# Supplementary material
Source: PubMed Central journal article supplement (PMC1560291)
Supplement: rspb20053458s03.pdf [file rspb20053458s03.pdf]

**Appendix A** – Patterns of parental care in birds, together with their phylogeny and geographic region. Parental care is classified on the basis of available data in Column 2, and inferred where data are unavailable or ambiguous in Column 3. Sources for behaviour and ecology are provided in Column 5.

Zoogeographic regions distinguished are given in Column (4): *Africa* (the Afrotropical Region, including Madagascar and other oceanic islands with an African derived fauna), the *Antarctic*, *Australia* (including the islands east of Wallace’s line, except where the species clearly have an origin from the Holarctic or Neotropics); the *Indomalayan* Region, the *Neotropical* Region, and the *Holarctic* (which is divided where possible into the *Palaearctic* and *Nearctic*).

Phylogenies are presented with relevant sources as a series of dichotomies (a versus b) or polytomies where appropriate for the Families used in this treatment in Column 6, and for clades below the level of family where molecular phylogenies are available in Column 8. Where such subfamilial phylogenies have not included some genera, these are grouped at the end of the sequence as *Untested*. The subfamilial data for the Cisticolidae and Muscicapidae refer primarily to the criteria for inclusion in those Families rather than a refined phylogeny. Where genera are known to be polyphyletic, I have included those species that have been subject to molecular scrutiny in the conventional systematic sequences, but grouped the untested species at the end of the sequence as *Polyphyletic*. Some species and higher clades are conservatively listed as *incertae sedis*.

| Higher taxon                    | Pattern of parental care |             | 4. Region   | 5. Source   | Phylogeny   |             |           |                |
|---------------------------------|--------------------------|-------------|-------------|-------------|-------------|-------------|-----------|----------------|
|                                 | 1. Species               | 2. Known    |             |             | 3. Inferred | 6. Familial | 7. Source | 8. Subfamilial |
| <b>Ratitae: Struthionidae</b>   |                          |             |             |             |             |             |           |                |
| <i>Struthio camelus</i>         |                          | Pair        | Pair        | Africa      | [1, 2]      | aaaa        |           | [3]            |
| <b>Ratitae: Rheidae</b>         |                          |             |             |             |             |             |           |                |
| <i>Rhea americana</i>           |                          | Cooperation | Cooperation | Neotropical | [4, 5]      | aaab        |           | [3]            |
| <i>R. pennata</i>               |                          | Male only   | Male only   | Neotropical | [5]         | --          |           | --             |
| <b>Ratitae: Casuariidae</b>     |                          |             |             |             |             |             |           |                |
| <i>Casuarus casuarus</i>        |                          | Male only   | Male only   | Australia   | [5]         | aaba        |           | [3]            |
| <i>C. bennetti</i>              |                          | Male only   | Male only   | Australia   | --          | --          |           | --             |
| <i>C. unappendiculatus</i>      |                          | Unknown     | Male only   | Australia   | --          | --          |           | --             |
| <i>Dromaius novaehollandiae</i> |                          | Male only   | Male only   | Australia   | --          | --          |           | --             |
| <b>Ratitae: Apterygidae</b>     |                          |             |             |             |             |             |           |                |
| <i>Apteryx australis</i>        |                          | Cooperation | Cooperation | Australia   | [5, 6]      | aabb        |           | [3]            |
| <i>A. mantelli</i>              |                          | Male only   | Male only   | Australia   | --          | --          |           | ab             |
| <i>A. rowi</i>                  |                          | Pair        | Pair        | Australia   | --          | --          |           | --             |
| <i>A. owenii</i>                |                          | Male only   | Male only   | Australia   | --          | --          |           | b              |
| <i>A. haastii</i>               |                          | Pair        | Pair        | Australia   | --          | --          |           | --             |
| <b>Ratitae: Tinamidae</b>       |                          |             |             |             |             |             |           |                |
| <i>Tinamus tao</i>              |                          | Male only   | Male only   | Neotropical | [5]         | ab          |           | [3]            |
| <i>T. solitarius</i>            |                          | Male only   | Male only   | Neotropical | --          | --          |           | --             |
| <i>T. osgoodi</i>               |                          | Unknown     | Male only   | Neotropical | --          | --          |           | --             |
| <i>T. major</i>                 |                          | Male only   | Male only   | Neotropical | --          | --          |           | --             |
| <i>T. guttatus</i>              |                          | Unknown     | Male only   | Neotropical | --          | --          |           | --             |
| <i>Nothocercus bonapartei</i>   |                          | Male only   | Male only   | Neotropical | --          | --          |           | --             |
| <i>N. julius</i>                |                          | Unknown     | Male only   | Neotropical | --          | --          |           | --             |
| <i>N. nigrocapillus</i>         |                          | Unknown     | Male only   | Neotropical | --          | --          |           | --             |
| <i>Crypturellus berlepschi</i>  |                          | Unknown     | Male only   | Neotropical | --          | --          |           | --             |

|                                 |           |           |             |    |    |    |
|---------------------------------|-----------|-----------|-------------|----|----|----|
| <i>C. cinereus</i>              | Unknown   | Male only | Neotropical | -- | -- | -- |
| <i>C. soui</i>                  | Male only | Male only | Neotropical | -- | -- | -- |
| <i>C. ptaritepui</i>            | Unknown   | Male only | Neotropical | -- | -- | -- |
| <i>C. obsoletus</i>             | Unknown   | Male only | Neotropical | -- | -- | -- |
| <i>C. cinnamomeus</i>           | Unknown   | Male only | Neotropical | -- | -- | -- |
| <i>C. undulatus</i>             | Unknown   | Male only | Neotropical | -- | -- | -- |
| <i>C. transfasciatus</i>        | Unknown   | Male only | Neotropical | -- | -- | -- |
| <i>C. strigulosus</i>           | Unknown   | Male only | Neotropical | -- | -- | -- |
| <i>C. boucardi</i>              | Male only | Male only | Neotropical | -- | -- | -- |
| <i>C. kerriae</i>               | Unknown   | Male only | Neotropical | -- | -- | -- |
| <i>C. erythropus</i>            | Unknown   | Male only | Neotropical | -- | -- | -- |
| <i>C. duidae</i>                | Unknown   | Male only | Neotropical | -- | -- | -- |
| <i>C. noctivagus</i>            | Male only | Male only | Neotropical | -- | -- | -- |
| <i>C. atrocapillus</i>          | Unknown   | Male only | Neotropical | -- | -- | -- |
| <i>C. variegatus</i>            | Male only | Male only | Neotropical | -- | -- | -- |
| <i>C. brevirostris</i>          | Unknown   | Male only | Neotropical | -- | -- | -- |
| <i>C. bartletti</i>             | Unknown   | Male only | Neotropical | -- | -- | -- |
| <i>C. parvirostris</i>          | Unknown   | Male only | Neotropical | -- | -- | -- |
| <i>C. casiquiare</i>            | Unknown   | Male only | Neotropical | -- | -- | -- |
| <i>C. tataupa</i>               | Unknown   | Male only | Neotropical | -- | -- | -- |
| <i>Rhynchotus rufescens</i>     | Male only | Male only | Neotropical | -- | -- | -- |
| <i>Nothoprocta taczanowskii</i> | Unknown   | Male only | Neotropical | -- | -- | -- |
| <i>N. kalinowskii</i>           | Unknown   | Male only | Neotropical | -- | -- | -- |
| <i>N. ornata</i>                | Male only | Male only | Neotropical | -- | -- | -- |
| <i>N. pentlandii</i>            | Male only | Male only | Neotropical | -- | -- | -- |
| <i>N. cinerascens</i>           | Male only | Male only | Neotropical | -- | -- | -- |
| <i>N. perdicaria</i>            | Unknown   | Male only | Neotropical | -- | -- | -- |
| <i>N. curvirostris</i>          | Unknown   | Male only | Neotropical | -- | -- | -- |
| <i>Nothura darwinii</i>         | Male only | Male only | Neotropical | -- | -- | -- |
| <i>N. chacoensis</i>            | Unknown   | Male only | Neotropical | -- | -- | -- |
| <i>N. maculosa</i>              | Male only | Male only | Neotropical | -- | -- | -- |
| <i>N. minor</i>                 | Unknown   | Male only | Neotropical | -- | -- | -- |
| <i>N. boraquira</i>             | Unknown   | Male only | Neotropical | -- | -- | -- |
| <i>Taoniscus nanus</i>          | Unknown   | Male only | Neotropical | -- | -- | -- |
| <i>Eudromia elegans</i>         | Male only | Male only | Neotropical | -- | -- | -- |
| <i>E. formosa</i>               | Unknown   | Male only | Neotropical | -- | -- | -- |
| <i>Tinamotis pentlandii</i>     | Unknown   | Male only | Neotropical | -- | -- | -- |
| <i>T. ingoufi</i>               | Unknown   | Male only | Neotropical | -- | -- | -- |

**Galliformes: Megapodidae**

|                             |           |           |           |     |      |     |    |      |
|-----------------------------|-----------|-----------|-----------|-----|------|-----|----|------|
| <i>Alectura lathamii</i>    | Male only | Male only | Australia | [8] | baaa | [9] | aa | [10] |
| <i>Aepyodius arfakianus</i> | Male only | Male only | Australia | --  | --   | --  | -- | --   |
| <i>A. bruijnii</i>          | Unknown   | Male only | Australia | --  | --   | --  | -- | --   |
| <i>Talegalla cuvieri</i>    | Unknown   | Pair      | Australia | --  | --   | --  | -- | --   |

|                                 |            |            |             |      |       |     |     |      |
|---------------------------------|------------|------------|-------------|------|-------|-----|-----|------|
| <i>T. fuscirostris</i>          | Unknown    | Pair       | Australia   | --   | --    | --  | --  | --   |
| <i>T. jobiensis</i>             | Unknown    | Pair       | Australia   | --   | --    | --  | --  | --   |
| <i>Leipoa ocellata</i>          | Pair       | Pair       | Australia   | --   | --    | --  | --  | --   |
| <i>Macrocephalon maleo</i>      | Geothermal | Geothermal | Australia   | --   | --    | --  | ab  | --   |
| <i>Megapodius nicobariensis</i> | Pair       | Pair       | Indomalayan | --   | --    | --  | b   | --   |
| <i>M. cumingii</i>              | Unknown    | Pair       | Indomalayan | --   | --    | --  | --  | --   |
| <i>M. bernsteinii</i>           | Unknown    | Pair       | Indomalayan | --   | --    | --  | --  | --   |
| <i>M. reinwardt</i>             | Unknown    | Pair       | Australia   | --   | --    | --  | --  | --   |
| <i>M. freycinet</i>             | Unknown    | Pair       | Australia   | --   | --    | --  | --  | --   |
| <i>M. affinis</i>               | Unknown    | Pair       | Australia   | --   | --    | --  | --  | --   |
| <i>M. eremita</i>               | Geothermal | Geothermal | Australia   | --   | --    | --  | --  | --   |
| <i>M. layardi</i>               | Unknown    | Pair       | Australia   | --   | --    | --  | --  | --   |
| <i>M. laperouse</i>             | Geothermal | Geothermal | Australia   | --   | --    | --  | --  | --   |
| <i>M. pritchardii</i>           | Geothermal | Geothermal | Australia   | [11] | --    | --  | --  | --   |
| <i>Eulipoa wallacei</i>         | Geothermal | Geothermal | Australia   | [8]  | --    | --  | --  | --   |
| <b>Galliformes: Cracidae</b>    |            |            |             |      |       |     |     |      |
| <i>Chamaepetes unicolor</i>     | Pair       | Pair       | Neotropical | [12] | baaba | [9] | aa  | [13] |
| <i>C. goudotii</i>              | Unknown    | Pair       | Neotropical | --   | --    | --  | --  | --   |
| <i>Penelopina nigra</i>         | Unknown    | Pair       | Neotropical | --   | --    | --  | --  | --   |
| <i>Penelope argyrotis</i>       | Unknown    | Pair       | Neotropical | --   | --    | --  | aba | --   |
| <i>P. barbata</i>               | Unknown    | Pair       | Neotropical | --   | --    | --  | --  | --   |
| <i>P. ortonii</i>               | Unknown    | Pair       | Neotropical | --   | --    | --  | --  | --   |
| <i>P. montagnii</i>             | Unknown    | Pair       | Neotropical | --   | --    | --  | --  | --   |
| <i>P. marail</i>                | Unknown    | Pair       | Neotropical | --   | --    | --  | --  | --   |
| <i>P. superciliaris</i>         | Unknown    | Pair       | Neotropical | --   | --    | --  | --  | --   |
| <i>P. dabbenei</i>              | Pair       | Pair       | Neotropical | --   | --    | --  | --  | --   |
| <i>P. purpurascens</i>          | Unknown    | Pair       | Neotropical | --   | --    | --  | --  | --   |
| <i>P. perspicax</i>             | Unknown    | Pair       | Neotropical | --   | --    | --  | --  | --   |
| <i>P. albipennis</i>            | Unknown    | Pair       | Neotropical | --   | --    | --  | --  | --   |
| <i>P. jacquacu</i>              | Unknown    | Pair       | Neotropical | --   | --    | --  | --  | --   |
| <i>P. obscura</i>               | Pair       | Pair       | Neotropical | --   | --    | --  | --  | --   |
| <i>P. pileata</i>               | Unknown    | Pair       | Neotropical | --   | --    | --  | --  | --   |
| <i>P. ochrogaster</i>           | Unknown    | Pair       | Neotropical | --   | --    | --  | --  | --   |
| <i>P. jacucaca</i>              | Unknown    | Pair       | Neotropical | --   | --    | --  | --  | --   |
| <i>Pipile pipile</i>            | Unknown    | Pair       | Neotropical | --   | --    | --  | abb | --   |
| <i>P. cumanensis</i>            | Pair       | Pair       | Neotropical | --   | --    | --  | --  | --   |
| <i>P. cujubi</i>                | Unknown    | Pair       | Neotropical | --   | --    | --  | --  | --   |
| <i>P. jacutinga</i>             | Unknown    | Pair       | Neotropical | --   | --    | --  | --  | --   |
| <i>Aburria aburri</i>           | Unknown    | Pair       | Neotropical | --   | --    | --  | --  | --   |
| <i>Ortalis vetula</i>           | Occasional | Pair       | Neotropical | [14] | --    | --  | ba  | --   |
| <i>O. cinereiceps</i>           | Unknown    | Pair       | Neotropical | [12] | --    | --  | --  | --   |
| <i>O. garrula</i>               | Unknown    | Pair       | Neotropical | --   | --    | --  | --  | --   |
| <i>O. ruficauda</i>             | Unknown    | Pair       | Neotropical | --   | --    | --  | --  | --   |

|                             |             |             |             |    |    |    |       |    |
|-----------------------------|-------------|-------------|-------------|----|----|----|-------|----|
| <i>O. erythroptera</i>      | Unknown     | Pair        | Neotropical | -- | -- | -- | --    | -- |
| <i>O. wagleri</i>           | Unknown     | Pair        | Neotropical | -- | -- | -- | --    | -- |
| <i>O. poliocephala</i>      | Unknown     | Pair        | Neotropical | -- | -- | -- | --    | -- |
| <i>O. canicollis</i>        | Unknown     | Pair        | Neotropical | -- | -- | -- | --    | -- |
| <i>O. leucogastra</i>       | Unknown     | Pair        | Neotropical | -- | -- | -- | --    | -- |
| <i>O. guttata</i>           | Unknown     | Pair        | Neotropical | -- | -- | -- | --    | -- |
| <i>O. motmot</i>            | Unknown     | Pair        | Neotropical | -- | -- | -- | --    | -- |
| <i>O. supercilialis</i>     | Unknown     | Pair        | Neotropical | -- | -- | -- | --    | -- |
| <i>Oreophasis derbianus</i> | Female only | Female only | Neotropical | -- | -- | -- | bba   | -- |
| <i>Crax rubra</i>           | Pair        | Pair        | Neotropical | -- | -- | -- | bbba  | -- |
| <i>C. alberti</i>           | Unknown     | Pair        | Neotropical | -- | -- | -- | --    | -- |
| <i>C. daubentoni</i>        | Female only | Female only | Neotropical | -- | -- | -- | --    | -- |
| <i>C. alector</i>           | Unknown     | Female only | Neotropical | -- | -- | -- | --    | -- |
| <i>C. globulosa</i>         | Unknown     | Female only | Neotropical | -- | -- | -- | --    | -- |
| <i>C. fasciolata</i>        | Unknown     | Female only | Neotropical | -- | -- | -- | --    | -- |
| <i>C. blumenbachii</i>      | Female only | Female only | Neotropical | -- | -- | -- | --    | -- |
| <i>Nothocrax urumutum</i>   | Pair        | Pair        | Neotropical | -- | -- | -- | bbbba | -- |
| <i>Mitu tomentosa</i>       | Unknown     | Pair        | Neotropical | -- | -- | -- | bbbbb | -- |
| <i>M. salvini</i>           | Pair        | Pair        | Neotropical | -- | -- | -- | --    | -- |
| <i>M. tuberosa</i>          | Unknown     | Pair        | Neotropical | -- | -- | -- | --    | -- |
| <i>M. mitu</i>              | Unknown     | Pair        | Neotropical | -- | -- | -- | --    | -- |
| <i>Pauxi pauxi</i>          | Female only | Female only | Neotropical | -- | -- | -- | --    | -- |
| <i>P. unicornis</i>         | Unknown     | Female only | Neotropical | -- | -- | -- | --    | -- |

**Galliformes: Odontophoridae**

|                                |             |             |             |          |        |     |  |  |
|--------------------------------|-------------|-------------|-------------|----------|--------|-----|--|--|
| <i>Dendrortyx barbatus</i>     | Unknown     | Pair        | Neotropical | [15]     | baabba | [9] |  |  |
| <i>D. macroura</i>             | Unknown     | Pair        | Neotropical | --       | --     | --  |  |  |
| <i>D. leucophrys</i>           | Unknown     | Pair        | Neotropical | --       | --     | --  |  |  |
| <i>Oreortyx pictus</i>         | Pair        | Pair        | Nearctic    | [15, 16] | --     | --  |  |  |
| <i>Callipepla squamata</i>     | Pair        | Pair        | Neotropical | [15]     | --     | --  |  |  |
| <i>C. douglasii</i>            | Pair        | Pair        | Neotropical | --       | --     | --  |  |  |
| <i>C. californica</i>          | Pair        | Pair        | Nearctic    | --       | --     | --  |  |  |
| <i>C. gambelii</i>             | Pair        | Pair        | Nearctic    | --       | --     | --  |  |  |
| <i>Philortyx fasciatus</i>     | Unknown     | Pair        | Neotropical | --       | --     | --  |  |  |
| <i>Colinus virginianus</i>     | Pair        | Pair        | Nearctic    | --       | --     | --  |  |  |
| <i>C. nigrogularis</i>         | Unknown     | Pair        | Neotropical | --       | --     | --  |  |  |
| <i>C. cristatus</i>            | Pair        | Pair        | Neotropical | --       | --     | --  |  |  |
| <i>Odontophorus gujanensis</i> | Pair        | Pair        | Neotropical | --       | --     | --  |  |  |
| <i>O. capueira</i>             | Female only | Female only | Neotropical | --       | --     | --  |  |  |
| <i>O. melanotis</i>            | Unknown     | Pair        | Neotropical | --       | --     | --  |  |  |
| <i>O. erythroptus</i>          | Unknown     | Pair        | Neotropical | --       | --     | --  |  |  |
| <i>O. atrifrons</i>            | Unknown     | Pair        | Neotropical | --       | --     | --  |  |  |
| <i>O. hyperythrus</i>          | Unknown     | Pair        | Neotropical | --       | --     | --  |  |  |
| <i>O. melanonotus</i>          | Unknown     | Pair        | Neotropical | --       | --     | --  |  |  |

|                               |         |      |             |    |    |    |
|-------------------------------|---------|------|-------------|----|----|----|
| <i>O. speciosus</i>           | Unknown | Pair | Neotropical | -- | -- | -- |
| <i>O. dialeucos</i>           | Unknown | Pair | Neotropical | -- | -- | -- |
| <i>O. strophium</i>           | Unknown | Pair | Neotropical | -- | -- | -- |
| <i>O. columbianus</i>         | Unknown | Pair | Neotropical | -- | -- | -- |
| <i>O. leucolaemus</i>         | Unknown | Pair | Neotropical | -- | -- | -- |
| <i>O. balliviani</i>          | Unknown | Pair | Neotropical | -- | -- | -- |
| <i>O. stellatus</i>           | Unknown | Pair | Neotropical | -- | -- | -- |
| <i>O. guttatus</i>            | Unknown | Pair | Neotropical | -- | -- | -- |
| <i>Dactylortyx thoracicus</i> | Unknown | Pair | Neotropical | -- | -- | -- |
| <i>Cyrtonyx montezumae</i>    | Pair    | Pair | Neotropical | -- | -- | -- |
| <i>C. ocellatus</i>           | Unknown | Pair | Neotropical | -- | -- | -- |
| <i>Rhynchortyx cinctus</i>    | Unknown | Pair | Neotropical | -- | -- | -- |

**Galliformes: Numididae**

|                              |         |      |        |      |          |     |
|------------------------------|---------|------|--------|------|----------|-----|
| <i>Agelastes meleagrides</i> | Unknown | Pair | Africa | [15] | baabbbba | [9] |
| <i>A. niger</i>              | Unknown | Pair | Africa | --   | --       | --  |
| <i>Numida meleagris</i>      | Pair    | Pair | Africa | --   | --       | --  |
| <i>Guttera plumifera</i>     | Unknown | Pair | Africa | --   | --       | --  |
| <i>G. pucherani</i>          | Pair    | Pair | Africa | --   | --       | --  |
| <i>Acryllium vulturinum</i>  | Pair    | Pair | Africa | --   | --       | --  |

**Galliformes: Phasianidae: Perdicinae**

|                                 |             |             |             |      |         |     |    |
|---------------------------------|-------------|-------------|-------------|------|---------|-----|----|
| <i>Lerwa lerwa</i>              | Pair        | Pair        | Indomalayan | [15] | baabbbb | [9] | a  |
| <i>Ammoperdix griseogularis</i> | Pair        | Pair        | Palaearctic | --   | --      | --  | -- |
| <i>A. heyi</i>                  | Pair        | Pair        | Palaearctic | --   | --      | --  | -- |
| <i>Tetraogallus caucasicus</i>  | Pair        | Pair        | Palaearctic | --   | --      | --  | -- |
| <i>T. caspius</i>               | Female only | Female only | Palaearctic | --   | --      | --  | -- |
| <i>T. tibetanus</i>             | Unknown     | Pair        | Indomalayan | --   | --      | --  | -- |
| <i>T. altaicus</i>              | Female only | Female only | Palaearctic | --   | --      | --  | -- |
| <i>T. himalayensis</i>          | Pair        | Pair        | Palaearctic | --   | --      | --  | -- |
| <i>Tetraophasis obscurus</i>    | Unknown     | Pair        | Palaearctic | --   | --      | --  | -- |
| <i>T. szechenyii</i>            | Unknown     | Pair        | Palaearctic | --   | --      | --  | -- |
| <i>Alectoris graeca</i>         | Pair        | Pair        | Palaearctic | --   | --      | --  | -- |
| <i>A. chukar</i>                | Pair        | Pair        | Palaearctic | --   | --      | --  | -- |
| <i>A. philbyi</i>               | Unknown     | Pair        | Palaearctic | --   | --      | --  | -- |
| <i>A. magna</i>                 | Pair        | Pair        | Palaearctic | --   | --      | --  | -- |
| <i>A. barbara</i>               | Unknown     | Pair        | Palaearctic | --   | --      | --  | -- |
| <i>A. rufa</i>                  | Unknown     | Pair        | Palaearctic | --   | --      | --  | -- |
| <i>A. melanocephala</i>         | Unknown     | Pair        | Palaearctic | --   | --      | --  | -- |
| <i>Francolinus francolinus</i>  | Pair        | Pair        | Palaearctic | --   | --      | --  | -- |
| <i>F. pictus</i>                | Pair        | Pair        | Indomalayan | --   | --      | --  | -- |
| <i>F. pintadeanus</i>           | Unknown     | Pair        | Indomalayan | --   | --      | --  | -- |
| <i>F. pondicerianus</i>         | Pair        | Pair        | Indomalayan | --   | --      | --  | -- |
| <i>F. gularis</i>               | Pair        | Pair        | Indomalayan | --   | --      | --  | -- |
| <i>F. coqui</i>                 | Pair        | Pair        | Africa      | --   | --      | --  | -- |

|                                   |         |      |             |          |    |    |    |
|-----------------------------------|---------|------|-------------|----------|----|----|----|
| <i>F. albogularis</i>             | Pair    | Pair | Africa      | --       | -- | -- | -- |
| <i>F. schlegelii</i>              | Pair    | Pair | Africa      | --       | -- | -- | -- |
| <i>F. lathamii</i>                | Pair    | Pair | Africa      | --       | -- | -- | -- |
| <i>F. sephaena</i>                | Pair    | Pair | Africa      | --       | -- | -- | -- |
| <i>F. streptophorus</i>           | Pair    | Pair | Africa      | --       | -- | -- | -- |
| <i>F. finschi</i>                 | Pair    | Pair | Africa      | --       | -- | -- | -- |
| <i>F. africanus</i>               | Pair    | Pair | Africa      | --       | -- | -- | -- |
| <i>F. levaillantii</i>            | Pair    | Pair | Africa      | --       | -- | -- | -- |
| <i>F. psilolaemus</i>             | Pair    | Pair | Africa      | --       | -- | -- | -- |
| <i>F. shelleyi</i>                | Pair    | Pair | Africa      | --       | -- | -- | -- |
| <i>F. levaillantoides</i>         | Pair    | Pair | Africa      | --       | -- | -- | -- |
| <i>F. nahani</i>                  | Unknown | Pair | Africa      | --       | -- | -- | -- |
| <i>F. hartlaubi</i>               | Pair    | Pair | Africa      | --       | -- | -- | -- |
| <i>F. bicalcaratus</i>            | Pair    | Pair | Africa      | --       | -- | -- | -- |
| <i>F. clappertoni</i>             | Unknown | Pair | Africa      | --       | -- | -- | -- |
| <i>F. icterorhynchus</i>          | Pair    | Pair | Africa      | --       | -- | -- | -- |
| <i>F. harwoodi</i>                | Unknown | Pair | Africa      | --       | -- | -- | -- |
| <i>F. adspersus</i>               | Pair    | Pair | Africa      | --       | -- | -- | -- |
| <i>F. capensis</i>                | Pair    | Pair | Africa      | --       | -- | -- | -- |
| <i>F. hildebrandti</i>            | Pair    | Pair | Africa      | --       | -- | -- | -- |
| <i>F. natalensis</i>              | Pair    | Pair | Africa      | --       | -- | -- | -- |
| <i>F. ahantensis</i>              | Unknown | Pair | Africa      | --       | -- | -- | -- |
| <i>F. squamatus</i>               | Pair    | Pair | Africa      | --       | -- | -- | -- |
| <i>F. griseostriatus</i>          | Unknown | Pair | Africa      | --       | -- | -- | -- |
| <i>F. leucoscepus</i>             | Pair    | Pair | Africa      | --       | -- | -- | -- |
| <i>F. rufopictus</i>              | Pair    | Pair | Africa      | --       | -- | -- | -- |
| <i>F. afer</i>                    | Pair    | Pair | Africa      | --       | -- | -- | -- |
| <i>F. swainsonii</i>              | Pair    | Pair | Africa      | --       | -- | -- | -- |
| <i>F. erckelii</i>                | Pair    | Pair | Africa      | --       | -- | -- | -- |
| <i>F. ochropectus</i>             | Unknown | Pair | Africa      | --       | -- | -- | -- |
| <i>F. castaneicollis</i>          | Pair    | Pair | Africa      | --       | -- | -- | -- |
| <i>F. nobilis</i>                 | Unknown | Pair | Africa      | --       | -- | -- | -- |
| <i>F. jacksoni</i>                | Unknown | Pair | Africa      | --       | -- | -- | -- |
| <i>F. camerunensis</i>            | Unknown | Pair | Africa      | --       | -- | -- | -- |
| <i>F. swierstrai</i>              | Unknown | Pair | Africa      | --       | -- | -- | -- |
| <i>Perdix perdix</i>              | Pair    | Pair | Palaearctic | --       | -- | -- | -- |
| <i>P. dauurica</i>                | Pair    | Pair | Palaearctic | --       | -- | -- | -- |
| <i>P. hodgsoniae</i>              | Unknown | Pair | Palaearctic | --       | -- | -- | -- |
| <i>Rhizothera longirostris</i>    | Unknown | Pair | Indomalayan | --       | -- | -- | -- |
| <i>Margaroperdix madagarensis</i> | Unknown | Pair | Africa      | --       | -- | -- | -- |
| <i>Melanoperdix nigra</i>         | Unknown | Pair | Indomalayan | --       | -- | -- | -- |
| <i>Coturnix coturnix</i>          | Pair    | Pair | Widespread  | [15, 17] | -- | -- | -- |
| <i>C. japonica</i>                | Pair    | Pair | Indomalayan | [15]     | -- | -- | -- |

|                                 |         |      |             |    |    |    |    |
|---------------------------------|---------|------|-------------|----|----|----|----|
| <i>C. pectoralis</i>            | Pair    | Pair | Australia   | -- | -- | -- | -- |
| <i>C. delegorguei</i>           | Pair    | Pair | Africa      | -- | -- | -- | -- |
| <i>C. ypsilophora</i>           | Pair    | Pair | Australia   | -- | -- | -- | -- |
| <i>C. adansonii</i>             | Pair    | Pair | Africa      | -- | -- | -- | -- |
| <i>C. chinensis</i>             | Pair    | Pair | Widespread  | -- | -- | -- | -- |
| <i>Anurophasis monorhonyx</i>   | Unknown | Pair | Africa      | -- | -- | -- | -- |
| <i>Perdicula asiatica</i>       | Pair    | Pair | Indomalayan | -- | -- | -- | -- |
| <i>P. argoondah</i>             | Pair    | Pair | Indomalayan | -- | -- | -- | -- |
| <i>P. erythrorhyncha</i>        | Pair    | Pair | Indomalayan | -- | -- | -- | -- |
| <i>P. manipurensis</i>          | Unknown | Pair | Indomalayan | -- | -- | -- | -- |
| <i>Arborophila torqueola</i>    | Pair    | Pair | Indomalayan | -- | -- | -- | -- |
| <i>A. rufogularis</i>           | Pair    | Pair | Indomalayan | -- | -- | -- | -- |
| <i>A. atrogularis</i>           | Pair    | Pair | Indomalayan | -- | -- | -- | -- |
| <i>A. crudigularis</i>          | Pair    | Pair | Palaearctic | -- | -- | -- | -- |
| <i>A. mandellii</i>             | Unknown | Pair | Indomalayan | -- | -- | -- | -- |
| <i>A. brunneopectus</i>         | Unknown | Pair | Indomalayan | -- | -- | -- | -- |
| <i>A. rufipectus</i>            | Pair    | Pair | Palaearctic | -- | -- | -- | -- |
| <i>A. orientalis</i>            | Unknown | Pair | Indomalayan | -- | -- | -- | -- |
| <i>A. javanica</i>              | Unknown | Pair | Indomalayan | -- | -- | -- | -- |
| <i>A. hyperythra</i>            | Unknown | Pair | Indomalayan | -- | -- | -- | -- |
| <i>A. gingica</i>               | Unknown | Pair | Palaearctic | -- | -- | -- | -- |
| <i>A. davidi</i>                | Unknown | Pair | Indomalayan | -- | -- | -- | -- |
| <i>A. cambodiana</i>            | Unknown | Pair | Indomalayan | -- | -- | -- | -- |
| <i>A. rubrirostris</i>          | Unknown | Pair | Indomalayan | -- | -- | -- | -- |
| <i>A. ardens</i>                | Unknown | Pair | Palaearctic | -- | -- | -- | -- |
| <i>A. chloropus</i>             | Unknown | Pair | Indomalayan | -- | -- | -- | -- |
| <i>A. merlini</i>               | Unknown | Pair | Indomalayan | -- | -- | -- | -- |
| <i>A. charltonii</i>            | Unknown | Pair | Indomalayan | -- | -- | -- | -- |
| <i>Caloperdix oculatea</i>      | Unknown | Pair | Indomalayan | -- | -- | -- | -- |
| <i>Haematortyx sanguiniceps</i> | Unknown | Pair | Indomalayan | -- | -- | -- | -- |
| <i>Rollulus rouloul</i>         | Pair    | Pair | Indomalayan | -- | -- | -- | -- |
| <i>Ptilopachus petrosus</i>     | Unknown | Pair | Africa      | -- | -- | -- | -- |
| <i>Bambusicola fytchii</i>      | Pair    | Pair | Indomalayan | -- | -- | -- | -- |
| <i>B. thoracica</i>             | Unknown | Pair | Palaearctic | -- | -- | -- | -- |
| <i>Galloperdix spadicea</i>     | Pair    | Pair | Indomalayan | -- | -- | -- | -- |
| <i>G. lunulata</i>              | Unknown | Pair | Indomalayan | -- | -- | -- | -- |
| <i>G. bicalcarata</i>           | Unknown | Pair | Indomalayan | -- | -- | -- | -- |

**Galliformes: Phasianidae: Phasianinae**

|                            |             |             |             |      |         |     |     |      |
|----------------------------|-------------|-------------|-------------|------|---------|-----|-----|------|
| <i>Gallus gallus</i>       | Female only | Female only | Indomalayan | [15] | baabbbb | [9] | ba  | [18] |
| <i>G. sonneratii</i>       | Unknown     | Female only | Indomalayan | --   | --      | --  | --  | --   |
| <i>G. lafayetii</i>        | Unknown     | Female only | Indomalayan | --   | --      | --  | --  | --   |
| <i>G. varius</i>           | Unknown     | Female only | Indomalayan | --   | --      | --  | --  | --   |
| <i>Pucrasia macrolopha</i> | Unknown     | Female only | Palaearctic | --   | --      | --  | bba | --   |

|                                |             |             |             |    |    |    |          |    |
|--------------------------------|-------------|-------------|-------------|----|----|----|----------|----|
| <i>Polyplectron chalcurum</i>  | Unknown     | Female only | Indomalayan | -- | -- | -- | bbba     | -- |
| <i>P. inopinatum</i>           | Unknown     | Female only | Indomalayan | -- | -- | -- | --       | -- |
| <i>P. germaini</i>             | Unknown     | Female only | Indomalayan | -- | -- | -- | --       | -- |
| <i>P. bicalcaratum</i>         | Unknown     | Female only | Indomalayan | -- | -- | -- | --       | -- |
| <i>P. malacense</i>            | Female only | Female only | Indomalayan | -- | -- | -- | --       | -- |
| <i>P. schleiermacheri</i>      | Unknown     | Female only | Indomalayan | -- | -- | -- | --       | -- |
| <i>P. emphanum</i>             | Unknown     | Female only | Indomalayan | -- | -- | -- | --       | -- |
| <i>Rheinardia ocellata</i>     | Unknown     | Female only | Indomalayan | -- | -- | -- | --       | -- |
| <i>Argusianus argus</i>        | Female only | Female only | Indomalayan | -- | -- | -- | --       | -- |
| <i>Afropavo congensis</i>      | Unknown     | Female only | Africa      | -- | -- | -- | --       | -- |
| <i>Pavo cristatus</i>          | Female only | Female only | Indomalayan | -- | -- | -- | --       | -- |
| <i>P. muticus</i>              | Female only | Female only | Indomalayan | -- | -- | -- | --       | -- |
| <i>Lophophorus impejanus</i>   | Unknown     | Pair        | Indomalayan | -- | -- | -- | bbbba    | -- |
| <i>L. sclateri</i>             | Unknown     | Pair        | Indomalayan | -- | -- | -- | --       | -- |
| <i>L. lhuyssii</i>             | Unknown     | Pair        | Palaearctic | -- | -- | -- | --       | -- |
| <i>Ithaginis cruentus</i>      | Pair        | Pair        | Palaearctic | -- | -- | -- | bbbbba   | -- |
| <i>Tragopan melanocephalus</i> | Pair        | Pair        | Indomalayan | -- | -- | -- | --       | -- |
| <i>T. satyra</i>               | Unknown     | Female only | Indomalayan | -- | -- | -- | --       | -- |
| <i>T. blythii</i>              | Unknown     | Female only | Indomalayan | -- | -- | -- | --       | -- |
| <i>T. temminckii</i>           | Female only | Female only | Palaearctic | -- | -- | -- | --       | -- |
| <i>T. caboti</i>               | Female only | Female only | Palaearctic | -- | -- | -- | --       | -- |
| <i>Lophura leucomelanos</i>    | Unknown     | Female only | Palaearctic | -- | -- | -- | bbbbbbba | -- |
| <i>L. nycthemera</i>           | Unknown     | Female only | Indomalayan | -- | -- | -- | --       | -- |
| <i>L. imperialis</i>           | Unknown     | Female only | Indomalayan | -- | -- | -- | --       | -- |
| <i>L. edwardsi</i>             | Unknown     | Female only | Indomalayan | -- | -- | -- | --       | -- |
| <i>L. hatinhensis</i>          | Unknown     | Female only | Indomalayan | -- | -- | -- | --       | -- |
| <i>L. swinhoii</i>             | Unknown     | Female only | Palaearctic | -- | -- | -- | --       | -- |
| <i>L. hoogerwerfi</i>          | Unknown     | Female only | Indomalayan | -- | -- | -- | --       | -- |
| <i>L. inornata</i>             | Unknown     | Female only | Indomalayan | -- | -- | -- | --       | -- |
| <i>L. erythroptthalma</i>      | Unknown     | Female only | Indomalayan | -- | -- | -- | --       | -- |
| <i>L. ignita</i>               | Unknown     | Female only | Indomalayan | -- | -- | -- | --       | -- |
| <i>L. diardi</i>               | Unknown     | Female only | Indomalayan | -- | -- | -- | --       | -- |
| <i>L. bulweri</i>              | Unknown     | Female only | Indomalayan | -- | -- | -- | --       | -- |
| <i>Crossoptilon harmani</i>    | Pair        | Pair        | Palaearctic | -- | -- | -- | bbbbbbba | -- |
| <i>C. crossoptilon</i>         | Unknown     | Pair        | Palaearctic | -- | -- | -- | --       | -- |
| <i>C. mantchuricum</i>         | Pair        | Pair        | Palaearctic | -- | -- | -- | --       | -- |
| <i>C. auritum</i>              | Pair        | Pair        | Palaearctic | -- | -- | -- | --       | -- |
| <i>Catreus wallichii</i>       | Pair        | Pair        | Indomalayan | -- | -- | -- | --       | -- |
| <i>Syrnaticus ellioti</i>      | Unknown     | Female only | Palaearctic | -- | -- | -- | --       | -- |
| <i>S. humiae</i>               | Unknown     | Female only | Indomalayan | -- | -- | -- | --       | -- |
| <i>S. mikado</i>               | Unknown     | Female only | Palaearctic | -- | -- | -- | --       | -- |
| <i>S. soemmerringii</i>        | Unknown     | Female only | Palaearctic | -- | -- | -- | --       | -- |
| <i>S. reevesii</i>             | Unknown     | Female only | Palaearctic | -- | -- | -- | --       | -- |



|                                              |             |             |             |          |         |     |       |      |
|----------------------------------------------|-------------|-------------|-------------|----------|---------|-----|-------|------|
| <i>Phasianus colchicus</i>                   | Female only | Female only | Palaearctic | --       | --      | --  | --    | --   |
| <i>Chrysolophus pictus</i>                   | Unknown     | Female only | Palaearctic | --       | --      | --  | --    | --   |
| <i>C. amherstiae</i>                         | Female only | Female only | Indomalayan | --       | --      | --  | --    | --   |
| <b>Galliformes: Phasianidae: Tetraoninae</b> |             |             |             |          |         |     |       |      |
| <i>Bonasa bonasia</i>                        | Female only | Female only | Palaearctic | [15]     | baabbbb | [9] | ca    | [19] |
| <i>B. sewerzowi</i>                          | Female only | Female only | Palaearctic | --       | --      | --  | --    | --   |
| <i>B. umbellus</i>                           | Female only | Female only | Nearctic    | --       | --      | --  | --    | --   |
| <i>Tympanuchus phasianellus</i>              | Female only | Female only | Nearctic    | --       | --      | --  | cbaaa | --   |
| <i>T. cupido</i>                             | Female only | Female only | Nearctic    | --       | --      | --  | --    | --   |
| <i>T. pallidicinctus</i>                     | Female only | Female only | Nearctic    | --       | --      | --  | --    | --   |
| <i>Dendragapus obscurus</i>                  | Female only | Female only | Nearctic    | --       | --      | --  | cbaab | --   |
| <i>Centrocercus urophasianus</i>             | Female only | Female only | Nearctic    | --       | --      | --  | --    | --   |
| <i>Lagopus lagopus</i>                       | Pair        | Pair        | Holarctic   | --       | --      | --  | cbab  | --   |
| <i>L. mutus</i>                              | Pair        | Pair        | Holarctic   | --       | --      | --  | --    | --   |
| <i>L. leucurus</i>                           | Pair        | Pair        | Nearctic    | --       | --      | --  | --    | --   |
| <i>Falcipecten falcipecten</i>               | Female only | Female only | Palaearctic | [15, 20] | --      | --  | cbbba | --   |
| <i>F. canadensis</i>                         | Female only | Female only | Nearctic    | [15]     | --      | --  | --    | --   |
| <i>Tetrao tetrix</i>                         | Female only | Female only | Palaearctic | --       | --      | --  | cbbbb | --   |
| <i>T. mlokosiewiczi</i>                      | Female only | Female only | Palaearctic | --       | --      | --  | --    | --   |
| <i>T. urogallus</i>                          | Female only | Female only | Palaearctic | --       | --      | --  | --    | --   |
| <i>T. parvirostris</i>                       | Female only | Female only | Palaearctic | --       | --      | --  | --    | --   |
| <b>Galliformes: Phasianidae: Meleagrinae</b> |             |             |             |          |         |     |       |      |
| <i>Meleagris gallopavo</i>                   | Female only | Female only | Nearctic    | [15]     | baabbbb | [9] | d     |      |
| <i>Agriocharis ocellata</i>                  | Female only | Female only | Neotropical | --       | --      | --  | --    |      |
| <b>Anseriformes: Anhimidae</b>               |             |             |             |          |         |     |       |      |
| <i>Anhima cornuta</i>                        | Pair        | Pair        | Neotropical | [21]     | baba    | [3] |       |      |
| <i>Chauna chavaria</i>                       | Pair        | Pair        | Neotropical | --       | --      | --  |       |      |
| <i>C. torquata</i>                           | Pair        | Pair        | Neotropical | --       | --      | --  |       |      |
| <b>Anseriformes: Anseranatidae</b>           |             |             |             |          |         |     |       |      |
| <i>Anseranas semipalmata</i>                 | Cooperation | Cooperation | Australia   | [22]     | babba   | [3] |       |      |
| <b>Anseriformes: Anatidae</b>                |             |             |             |          |         |     |       |      |
| <i>Dendrocygna guttata</i>                   | Pair        | Pair        | Australia   | [23]     | babbb   | [3] |       |      |
| <i>D. eytoni</i>                             | Pair        | Pair        | Australia   | [22]     | --      | --  |       |      |
| <i>D. bicolor</i>                            | Pair        | Pair        | Widespread  | [24, 25] | --      | --  |       |      |
| <i>D. arcuata</i>                            | Pair        | Pair        | Australia   | [22]     | --      | --  |       |      |
| <i>D. javanica</i>                           | Pair        | Pair        | Indomalayan | [23]     | --      | --  |       |      |
| <i>D. viduata</i>                            | Pair        | Pair        | Widespread  | --       | --      | --  |       |      |
| <i>D. arborea</i>                            | Pair        | Pair        | Neotropical | --       | --      | --  |       |      |
| <i>D. autumnalis</i>                         | Pair        | Pair        | Neotropical | [26]     | --      | --  |       |      |
| <i>Thalassornis leuconotus</i>               | Pair        | Pair        | Africa      | [23]     | --      | --  |       |      |
| <i>Oxyura dominica</i>                       | Female only | Female only | Neotropical | [27, 28] | --      | --  |       |      |
| <i>O. jamaicensis</i>                        | Female only | Female only | Widespread  | [28]     | --      | --  |       |      |
| <i>O. ferruginea</i>                         | Subspp      | Subspp      | Neotropical | [23]     | --      | --  |       |      |

|                                  |                |                |             |              |    |    |
|----------------------------------|----------------|----------------|-------------|--------------|----|----|
| <i>O. leucocephala</i>           | Female only    | Female only    | Palaearctic | [28]         | -- | -- |
| <i>O. maccoa</i>                 | Female only    | Female only    | Africa      | --           | -- | -- |
| <i>O. vittata</i>                | Female only    | Female only    | Neotropical | [28, 29]     | -- | -- |
| <i>O. australis</i>              | Female only    | Female only    | Australia   | [22, 28]     | -- | -- |
| <i>Biziura lobata</i>            | Female only    | Female only    | Australia   | [22, 28, 30] | -- | -- |
| <i>Heteronetta atricapilla</i>   | Brood parasite | Brood parasite | Neotropical | [28]         | -- | -- |
| <i>Stictonetta naevosa</i>       | Female only    | Female only    | Australia   | [22]         | -- | -- |
| <i>Cygnus olor</i>               | Occasional     | Pair           | Palaearctic | [23, 25, 31] | -- | -- |
| <i>C. atratus</i>                | Pair           | Pair           | Australia   | [22]         | -- | -- |
| <i>C. melanocorypha</i>          | Pair           | Pair           | Neotropical | [23]         | -- | -- |
| <i>C. cygnus</i>                 | Pair           | Pair           | Palaearctic | [23, 25]     | -- | -- |
| <i>C. buccinator</i>             | Pair           | Pair           | Nearctic    | [23]         | -- | -- |
| <i>C. columbianus</i>            | Pair           | Pair           | Holarctic   | [23, 25]     | -- | -- |
| <i>Coscoroba coscoroba</i>       | Pair           | Pair           | Neotropical | [23]         | -- | -- |
| <i>Anser cygnoides</i>           | Pair           | Pair           | Palaearctic | [32]         | -- | -- |
| <i>A. brachyrhynchus</i>         | Pair           | Pair           | Palaearctic | [25, 33]     | -- | -- |
| <i>A. fabalis</i>                | Pair           | Pair           | Palaearctic | --           | -- | -- |
| <i>A. albifrons</i>              | Occasional     | Pair           | Holarctic   | [25, 34]     | -- | -- |
| <i>A. erythropus</i>             | Pair           | Pair           | Palaearctic | [33]         | -- | -- |
| <i>A. anser</i>                  | Occasional     | Pair           | Palaearctic | --           | -- | -- |
| <i>A. indicus</i>                | Pair           | Pair           | Palaearctic | [32]         | -- | -- |
| <i>A. caerulescens</i>           | Pair           | Pair           | Holarctic   | [25, 35]     | -- | -- |
| <i>A. rossii</i>                 | Pair           | Pair           | Nearctic    | [25, 36]     | -- | -- |
| <i>A. canagica</i>               | Pair           | Pair           | Holarctic   | [37]         | -- | -- |
| <i>Branta sandvicensis</i>       | Occasional     | Pair           | Nearctic    | [38]         | -- | -- |
| <i>B. canadensis</i>             | Pair           | Pair           | Holarctic   | [33]         | -- | -- |
| <i>B. leucopsis</i>              | Pair           | Pair           | Holarctic   | --           | -- | -- |
| <i>B. bernicla</i>               | Pair           | Pair           | Holarctic   | [25, 39]     | -- | -- |
| <i>B. ruficollis</i>             | Pair           | Pair           | Palaearctic | [32]         | -- | -- |
| <i>Cereopsis novaehollandiae</i> | Pair           | Pair           | Australia   | [22]         | -- | -- |
| <i>Cyanochen cyanopterus</i>     | Pair           | Pair           | Africa      | [40]         | -- | -- |
| <i>Chloephaga melanoptera</i>    | Pair           | Pair           | Neotropical | [25, 32]     | -- | -- |
| <i>C. picta</i>                  | Pair           | Pair           | Neotropical | [32]         | -- | -- |
| <i>C. hybrida</i>                | Pair           | Pair           | Neotropical | --           | -- | -- |
| <i>C. poliocephala</i>           | Pair           | Pair           | Neotropical | --           | -- | -- |
| <i>C. rubidiceps</i>             | Pair           | Pair           | Neotropical | --           | -- | -- |
| <i>Neochen jubata</i>            | Pair           | Pair           | Neotropical | --           | -- | -- |
| <i>Alopochen aegyptiacus</i>     | Pair           | Pair           | Africa      | [33]         | -- | -- |
| <i>Tadorna ferruginea</i>        | Pair           | Pair           | Palaearctic | --           | -- | -- |
| <i>T. cana</i>                   | Pair           | Pair           | Africa      | [40]         | -- | -- |
| <i>T. tadornoides</i>            | Pair           | Pair           | Australia   | [22]         | -- | -- |
| <i>T. variegata</i>              | Pair           | Pair           | Australia   | [22, 25]     | -- | -- |
| <i>T. tadorna</i>                | Pair           | Pair           | Palaearctic | [25, 33]     | -- | -- |

|                                    |             |             |             |          |    |    |
|------------------------------------|-------------|-------------|-------------|----------|----|----|
| <i>T. radjah</i>                   | Pair        | Pair        | Australia   | [22]     | -- | -- |
| <i>Tachyeres pteneres</i>          | Pair        | Pair        | Neotropical | [32]     | -- | -- |
| <i>T. leucocephalus</i>            | Pair        | Pair        | Neotropical | [23, 25] | -- | -- |
| <i>T. brachypterus</i>             | Pair        | Pair        | Neotropical | [32]     | -- | -- |
| <i>T. patachonicus</i>             | Pair        | Pair        | Neotropical | --       | -- | -- |
| <i>Plectropterus gambensis</i>     | Pair        | Pair        | Africa      | [40]     | -- | -- |
| <i>Cairina moschata</i>            | Female only | Female only | Neotropical | [32]     | -- | -- |
| <i>C. scutulata</i>                | Pair        | Pair        | Indomalayan | --       | -- | -- |
| <i>Pteronetta hartlaubii</i>       | Pair        | Pair        | Africa      | [40]     | -- | -- |
| <i>Sarkidiornis melanotos</i>      | Female only | Female only | Africa      | --       | -- | -- |
| <i>Nettapus pulchellus</i>         | Pair        | Pair        | Australia   | [22]     | -- | -- |
| <i>N. coromandelianus</i>          | Pair        | Pair        | Widespread  | --       | -- | -- |
| <i>N. auritus</i>                  | Pair        | Pair        | Africa      | [40]     | -- | -- |
| <i>Callonetta leucophrys</i>       | Pair        | Pair        | Neotropical | [32]     | -- | -- |
| <i>Aix sponsa</i>                  | Female only | Female only | Nearctic    | [41]     | -- | -- |
| <i>A. galericulata</i>             | Female only | Female only | Palaearctic | [33]     | -- | -- |
| <i>Chenonetta jubata</i>           | Pair        | Pair        | Australia   | [22]     | -- | -- |
| <i>Amazonetta brasiliensis</i>     | Pair        | Pair        | Neotropical | [32]     | -- | -- |
| <i>Merganetta armata</i>           | Pair        | Pair        | Neotropical | --       | -- | -- |
| <i>Hymenolaimus malacorhynchos</i> | Pair        | Pair        | Australia   | [22, 25] | -- | -- |
| <i>Salvadorina waigiuenis</i>      | Pair        | Pair        | Australia   | [32]     | -- | -- |
| <i>Anas specularioides</i>         | Pair        | Pair        | Neotropical | --       | -- | -- |
| <i>A. specularis</i>               | Pair        | Pair        | Neotropical | --       | -- | -- |
| <i>A. capensis</i>                 | Pair        | Pair        | Africa      | [40]     | -- | -- |
| <i>A. strepera</i>                 | Female only | Female only | Holarctic   | [42]     | -- | -- |
| <i>A. falcata</i>                  | Female only | Female only | Palaearctic | [32]     | -- | -- |
| <i>A. penelope</i>                 | Female only | Female only | Palaearctic | [33, 43] | -- | -- |
| <i>A. americana</i>                | Female only | Female only | Nearctic    | [44]     | -- | -- |
| <i>A. sibilatrix</i>               | Pair        | Pair        | Neotropical | [32]     | -- | -- |
| <i>A. sparsa</i>                   | Female only | Female only | Africa      | [40]     | -- | -- |
| <i>A. rubripes</i>                 | Female only | Female only | Nearctic    | [45]     | -- | -- |
| <i>A. fulvigula</i>                | Female only | Female only | Nearctic    | [43, 46] | -- | -- |
| <i>A. platyrhynchos</i>            | Female only | Female only | Holarctic   | [47]     | -- | -- |
| <i>A. wyvilliana</i>               | Female only | Female only | Nearctic    | [43, 48] | -- | -- |
| <i>A. laysanensis</i>              | Female only | Female only | Nearctic    | [49]     | -- | -- |
| <i>A. poecilorhyncha</i>           | Unknown     | Pair        | Widespread  | [23, 43] | -- | -- |
| <i>A. luzonica</i>                 | Unknown     | Female only | Indomalayan | [32, 43] | -- | -- |
| <i>A. superciliosa</i>             | Pair        | Pair        | Australia   | [22, 43] | -- | -- |
| <i>A. undulata</i>                 | Pair        | Pair        | Africa      | [40, 43] | -- | -- |
| <i>A. melleri</i>                  | Unknown     | Female only | Africa      | [23, 43] | -- | -- |
| <i>A. discors</i>                  | Female only | Female only | Nearctic    | [50]     | -- | -- |
| <i>A. cyanoptera</i>               | Female only | Female only | Widespread  | [43, 51] | -- | -- |
| <i>A. smithii</i>                  | Pair        | Pair        | Africa      | [40, 43] | -- | -- |

|                                    |             |             |             |          |    |    |
|------------------------------------|-------------|-------------|-------------|----------|----|----|
| <i>A. platalea</i>                 | Unknown     | Female only | Neotropical | [32]     | -- | -- |
| <i>A. rhynchotis</i>               | Female only | Female only | Australia   | [22]     | -- | -- |
| <i>A. clypeata</i>                 | Female only | Female only | Holarctic   | [52]     | -- | -- |
| <i>A. bernieri</i>                 | Pair        | Pair        | Africa      | [32, 43] | -- | -- |
| <i>A. gibberifrons</i>             | Unknown     | Pair        | Australia   | [23, 43] | -- | -- |
| <i>A. gracilis</i>                 | Pair        | Pair        | Australia   | [22]     | -- | -- |
| <i>A. castanea</i>                 | Pair        | Pair        | Australia   | --       | -- | -- |
| <i>A. aucklandica</i>              | Pair        | Pair        | Australia   | --       | -- | -- |
| <i>A. bahamensis</i>               | Female only | Female only | Neotropical | [32]     | -- | -- |
| <i>A. erythrorhyncha</i>           | Female only | Female only | Africa      | [40]     | -- | -- |
| <i>A. flavirostris</i>             | Pair        | Pair        | Neotropical | [22, 32] | -- | -- |
| <i>A. acuta</i>                    | Female only | Female only | Holarctic   | [53]     | -- | -- |
| <i>A. eatoni</i>                   | Female only | Female only | Antarctic   | [22]     | -- | -- |
| <i>A. georgica</i>                 | Pair        | Pair        | Neotropical | [32]     | -- | -- |
| <i>A. querquedula</i>              | Female only | Female only | Paleartic   | [33]     | -- | -- |
| <i>A. formosa</i>                  | Female only | Female only | Paleartic   | [32, 43] | -- | -- |
| <i>A. crecca</i>                   | Female only | Female only | Holarctic   | [54]     | -- | -- |
| <i>A. puna</i>                     | Subspp      | Subspp      | Neotropical | [32]     | -- | -- |
| <i>A. versicolor</i>               | Pair        | Pair        | Neotropical | --       | -- | -- |
| <i>A. hottentota</i>               | Pair        | Pair        | Africa      | [40]     | -- | -- |
| <i>Malacorhynchus membranaceus</i> | Pair        | Pair        | Australia   | [22]     | -- | -- |
| <i>Marmaronetta angustirostris</i> | Female only | Female only | Paleartic   | [33]     | -- | -- |
| <i>Netta rufina</i>                | Female only | Female only | Paleartic   | --       | -- | -- |
| <i>N. peposaca</i>                 | Female only | Female only | Neotropical | [32]     | -- | -- |
| <i>N. erythrophthalma</i>          | Female only | Female only | Africa      | [40]     | -- | -- |
| <i>Aythya ferina</i>               | Female only | Female only | Paleartic   | [33]     | -- | -- |
| <i>A. valisineria</i>              | Female only | Female only | Nearctic    | [55]     | -- | -- |
| <i>A. americana</i>                | Female only | Female only | Nearctic    | [56]     | -- | -- |
| <i>A. collaris</i>                 | Female only | Female only | Nearctic    | [57]     | -- | -- |
| <i>A. nyroca</i>                   | Female only | Female only | Paleartic   | [33]     | -- | -- |
| <i>A. innotata</i>                 | Unknown     | Female only | Africa      | [32]     | -- | -- |
| <i>A. baeri</i>                    | Unknown     | Female only | Paleartic   | --       | -- | -- |
| <i>A. australis</i>                | Female only | Female only | Australia   | [22]     | -- | -- |
| <i>A. fuligula</i>                 | Female only | Female only | Paleartic   | [33, 43] | -- | -- |
| <i>A. novaeseelandiae</i>          | Female only | Female only | Australia   | [22]     | -- | -- |
| <i>A. marila</i>                   | Female only | Female only | Holarctic   | [43, 58] | -- | -- |
| <i>A. affinis</i>                  | Female only | Female only | Nearctic    | [43, 59] | -- | -- |
| <i>Somateria mollissima</i>        | Female only | Female only | Holarctic   | [60]     | -- | -- |
| <i>S. spectabilis</i>              | Female only | Female only | Holarctic   | [43, 61] | -- | -- |
| <i>S. fischeri</i>                 | Female only | Female only | Holarctic   | [62]     | -- | -- |
| <i>Polysticta stelleri</i>         | Female only | Female only | Holarctic   | [63]     | -- | -- |
| <i>Histrionicus histrionicus</i>   | Female only | Female only | Holarctic   | [64]     | -- | -- |
| <i>Clangula hyemalis</i>           | Female only | Female only | Holarctic   | [43, 65] | -- | -- |

|                              |             |             |             |          |    |    |
|------------------------------|-------------|-------------|-------------|----------|----|----|
| <i>Melanitta nigra</i>       | Female only | Female only | Holarctic   | [66]     | -- | -- |
| <i>M. perspicillata</i>      | Female only | Female only | Holarctic   | [43, 67] | -- | -- |
| <i>M. fusca</i>              | Female only | Female only | Holarctic   | [68]     | -- | -- |
| <i>Bucephala clangula</i>    | Female only | Female only | Holarctic   | [69]     | -- | -- |
| <i>B. islandica</i>          | Female only | Female only | Nearctic    | [70]     | -- | -- |
| <i>B. albeola</i>            | Female only | Female only | Nearctic    | [71]     | -- | -- |
| <i>Mergellus albellus</i>    | Female only | Female only | Palaearctic | [33]     | -- | -- |
| <i>Lophodytes cucullatus</i> | Female only | Female only | Nearctic    | [72]     | -- | -- |
| <i>Mergus octosetaceus</i>   | Pair        | Pair        | Neotropical | [32]     | -- | -- |
| <i>M. serrator</i>           | Female only | Female only | Holarctic   | [73]     | -- | -- |
| <i>M. squamatus</i>          | Female only | Female only | Palaearctic | [32, 43] | -- | -- |
| <i>M. merganser</i>          | Female only | Female only | Holarctic   | [74]     | -- | -- |

**Piciformes: Galbulidae**

|                                  |             |             |             |      |        |      |
|----------------------------------|-------------|-------------|-------------|------|--------|------|
| <i>Galbalcyrhynchus leucotis</i> | Unknown     | Cooperation | Neotropical | [75] | bbaaaa | [76] |
| <i>G. purusianus</i>             | Suspected   | Cooperation | Neotropical | --   | --     | --   |
| <i>Brachygalba salmoni</i>       | Unknown     | Cooperation | Neotropical | --   | --     | --   |
| <i>B. goeringi</i>               | Unknown     | Cooperation | Neotropical | --   | --     | --   |
| <i>B. lugubris</i>               | Unknown     | Cooperation | Neotropical | --   | --     | --   |
| <i>B. albogularis</i>            | Cooperation | Cooperation | Neotropical | [77] | --     | --   |
| <i>Jacamaralcyon tridactyla</i>  | Suspected   | Cooperation | Neotropical | [75] | --     | --   |
| <i>Galbula albirostris</i>       | Unknown     | Cooperation | Neotropical | --   | --     | --   |
| <i>G. cyanicollis</i>            | Unknown     | Cooperation | Neotropical | --   | --     | --   |
| <i>G. ruficauda</i>              | Cooperation | Cooperation | Neotropical | [78] | --     | --   |
| <i>G. galbula</i>                | Suspected   | Cooperation | Neotropical | [75] | --     | --   |
| <i>G. pastazae</i>               | Unknown     | Cooperation | Neotropical | --   | --     | --   |
| <i>G. tombacea</i>               | Unknown     | Cooperation | Neotropical | --   | --     | --   |
| <i>G. cyanescens</i>             | Unknown     | Cooperation | Neotropical | --   | --     | --   |
| <i>G. chalthorax</i>             | Unknown     | Cooperation | Neotropical | --   | --     | --   |
| <i>G. leucogastra</i>            | Unknown     | Cooperation | Neotropical | --   | --     | --   |
| <i>G. dea</i>                    | Unknown     | Cooperation | Neotropical | --   | --     | --   |
| <i>Jacamerops aureus</i>         | Unknown     | Cooperation | Neotropical | --   | --     | --   |

**Piciformes: Bucconidae**

|                                 |         |      |             |          |        |      |
|---------------------------------|---------|------|-------------|----------|--------|------|
| <i>Notharchus macrorhynchus</i> | Pair    | Pair | Neotropical | [79, 80] | bbaaab | [76] |
| <i>N. pectoralis</i>            | Pair    | Pair | Neotropical | [80]     | --     | --   |
| <i>N. ordii</i>                 | Unknown | Pair | Neotropical | --       | --     | --   |
| <i>N. tectus</i>                | Unknown | Pair | Neotropical | --       | --     | --   |
| <i>Bucco macrodactylus</i>      | Unknown | Pair | Neotropical | --       | --     | --   |
| <i>B. tamatia</i>               | Unknown | Pair | Neotropical | --       | --     | --   |
| <i>B. noanamae</i>              | Unknown | Pair | Neotropical | --       | --     | --   |
| <i>B. capensis</i>              | Unknown | Pair | Neotropical | --       | --     | --   |
| <i>Nystalus radiatus</i>        | Unknown | Pair | Neotropical | --       | --     | --   |
| <i>N. chacuru</i>               | Unknown | Pair | Neotropical | --       | --     | --   |
| <i>N. striolatus</i>            | Unknown | Pair | Neotropical | --       | --     | --   |

|                                 |             |             |             |          |         |          |
|---------------------------------|-------------|-------------|-------------|----------|---------|----------|
| <i>N. maculatus</i>             | Unknown     | Pair        | Neotropical | --       | --      | --       |
| <i>Hypnelus ruficollis</i>      | Unknown     | Pair        | Neotropical | --       | --      | --       |
| <i>Malacoptila fusca</i>        | Unknown     | Pair        | Neotropical | --       | --      | --       |
| <i>M. semicincta</i>            | Unknown     | Pair        | Neotropical | --       | --      | --       |
| <i>M. striata</i>               | Unknown     | Pair        | Neotropical | --       | --      | --       |
| <i>M. fulvogularis</i>          | Unknown     | Pair        | Neotropical | --       | --      | --       |
| <i>M. rufa</i>                  | Unknown     | Pair        | Neotropical | --       | --      | --       |
| <i>M. panamensis</i>            | Unknown     | Pair        | Neotropical | --       | --      | --       |
| <i>M. mystacalis</i>            | Unknown     | Pair        | Neotropical | --       | --      | --       |
| <i>Micromonacha lanceolata</i>  | Unknown     | Pair        | Neotropical | --       | --      | --       |
| <i>Nonnula rubecula</i>         | Unknown     | Pair        | Neotropical | --       | --      | --       |
| <i>N. sclateri</i>              | Unknown     | Pair        | Neotropical | --       | --      | --       |
| <i>N. brunnea</i>               | Unknown     | Pair        | Neotropical | --       | --      | --       |
| <i>N. frontalis</i>             | Unknown     | Pair        | Neotropical | --       | --      | --       |
| <i>N. ruficapilla</i>           | Unknown     | Pair        | Neotropical | --       | --      | --       |
| <i>N. amaurocephala</i>         | Unknown     | Pair        | Neotropical | --       | --      | --       |
| <i>Hapaloptila castanea</i>     | Unknown     | Pair        | Neotropical | --       | --      | --       |
| <i>Monasa atra</i>              | Suspected   | Cooperation | Neotropical | [79, 80] | --      | --       |
| <i>M. nigrifrons</i>            | Unknown     | Cooperation | Neotropical | [80]     | --      | --       |
| <i>M. morphoeus</i>             | Cooperation | Cooperation | Neotropical | --       | --      | --       |
| <i>M. flavirostris</i>          | Unknown     | Cooperation | Neotropical | --       | --      | --       |
| <i>Chelidoptera tenebrosa</i>   | Cooperation | Cooperation | Neotropical | --       | --      | --       |
| <b>Piciformes: Megalaimidae</b> |             |             |             |          |         |          |
| <i>Psilopogon pyrolophus</i>    | Unknown     | Pair        | Indomalayan | [81]     | bbaabaa | [76, 82] |
| <i>Megalaima virens</i>         | Pair        | Pair        | Indomalayan | --       | --      | --       |
| <i>M. lagrandieri</i>           | Unknown     | Pair        | Indomalayan | --       | --      | --       |
| <i>M. zeylanica</i>             | Pair        | Pair        | Indomalayan | --       | --      | --       |
| <i>M. lineata</i>               | Pair        | Pair        | Indomalayan | --       | --      | --       |
| <i>M. viridis</i>               | Pair        | Pair        | Indomalayan | --       | --      | --       |
| <i>M. faiostricta</i>           | Unknown     | Pair        | Indomalayan | --       | --      | --       |
| <i>M. corvina</i>               | Unknown     | Pair        | Indomalayan | --       | --      | --       |
| <i>M. chrysopogon</i>           | Unknown     | Pair        | Indomalayan | --       | --      | --       |
| <i>M. rafflesii</i>             | Unknown     | Pair        | Indomalayan | --       | --      | --       |
| <i>M. mystacophanos</i>         | Unknown     | Pair        | Indomalayan | --       | --      | --       |
| <i>M. javensis</i>              | Unknown     | Pair        | Indomalayan | --       | --      | --       |
| <i>M. flavifrons</i>            | Unknown     | Pair        | Indomalayan | --       | --      | --       |
| <i>M. franklinii</i>            | Pair        | Pair        | Indomalayan | --       | --      | --       |
| <i>M. oorti</i>                 | Unknown     | Pair        | Indomalayan | --       | --      | --       |
| <i>M. asiatica</i>              | Pair        | Pair        | Indomalayan | --       | --      | --       |
| <i>M. monticola</i>             | Unknown     | Pair        | Indomalayan | --       | --      | --       |
| <i>M. incognita</i>             | Unknown     | Pair        | Indomalayan | --       | --      | --       |
| <i>M. henricii</i>              | Unknown     | Pair        | Indomalayan | --       | --      | --       |
| <i>M. armillaris</i>            | Pair        | Pair        | Indomalayan | --       | --      | --       |

|                                 |         |      |             |    |    |    |
|---------------------------------|---------|------|-------------|----|----|----|
| <i>M. pulcherrima</i>           | Unknown | Pair | Indomalayan | -- | -- | -- |
| <i>M. australis</i>             | Unknown | Pair | Indomalayan | -- | -- | -- |
| <i>M. eximia</i>                | Unknown | Pair | Indomalayan | -- | -- | -- |
| <i>M. rubricapilla</i>          | Pair    | Pair | Indomalayan | -- | -- | -- |
| <i>M. haemacephala</i>          | Pair    | Pair | Indomalayan | -- | -- | -- |
| <i>Calorhamphus fuliginosus</i> | Unknown | Pair | Indomalayan | -- | -- | -- |

**Piciformes: Lybiidae**

|                               |             |             |        |      |          |          |
|-------------------------------|-------------|-------------|--------|------|----------|----------|
| <i>Gymnobucco calvus</i>      | Suspected   | Cooperation | Africa | [81] | bbaababa | [76, 82] |
| <i>G. peli</i>                | Unknown     | Cooperation | Africa | --   | --       | --       |
| <i>G. sladeni</i>             | Unknown     | Cooperation | Africa | --   | --       | --       |
| <i>G. bonapartei</i>          | Cooperation | Cooperation | Africa | --   | --       | --       |
| <i>Stactolaema leucotis</i>   | Cooperation | Cooperation | Africa | --   | --       | --       |
| <i>S. anchietae</i>           | Cooperation | Cooperation | Africa | --   | --       | --       |
| <i>S. whytii</i>              | Cooperation | Cooperation | Africa | --   | --       | --       |
| <i>S. olivacea</i>            | Cooperation | Cooperation | Africa | --   | --       | --       |
| <i>Pogoniulus scolopaceus</i> | Cooperation | Cooperation | Africa | --   | --       | --       |
| <i>P. coryphaeus</i>          | Unknown     | Pair        | Africa | --   | --       | --       |
| <i>P. leucomystax</i>         | Pair        | Pair        | Africa | --   | --       | --       |
| <i>P. simplex</i>             | Unknown     | Pair        | Africa | --   | --       | --       |
| <i>P. atroflavus</i>          | Unknown     | Pair        | Africa | --   | --       | --       |
| <i>P. subsulphureus</i>       | Pair        | Pair        | Africa | --   | --       | --       |
| <i>P. bilineatus</i>          | Pair        | Pair        | Africa | --   | --       | --       |
| <i>P. chrysoconus</i>         | Pair        | Pair        | Africa | --   | --       | --       |
| <i>P. pusillus</i>            | Pair        | Pair        | Africa | --   | --       | --       |
| <i>Buccanodon duchaillui</i>  | Unknown     | Pair        | Africa | --   | --       | --       |
| <i>Tricholaema hirsuta</i>    | Unknown     | Pair        | Africa | --   | --       | --       |
| <i>T. diademata</i>           | Pair        | Pair        | Africa | --   | --       | --       |
| <i>T. frontata</i>            | Pair        | Pair        | Africa | --   | --       | --       |
| <i>T. leucomelas</i>          | Pair        | Pair        | Africa | --   | --       | --       |
| <i>T. lacrymosa</i>           | Cooperation | Cooperation | Africa | --   | --       | --       |
| <i>T. melanocephala</i>       | Pair        | Pair        | Africa | --   | --       | --       |
| <i>Lybius undatus</i>         | Suspected   | Cooperation | Africa | --   | --       | --       |
| <i>L. vieilloti</i>           | Cooperation | Cooperation | Africa | --   | --       | --       |
| <i>L. leucocephalus</i>       | Cooperation | Cooperation | Africa | --   | --       | --       |
| <i>L. chaplini</i>            | Cooperation | Cooperation | Africa | --   | --       | --       |
| <i>L. rubrifacies</i>         | Suspected   | Cooperation | Africa | --   | --       | --       |
| <i>L. guifsobalito</i>        | Suspected   | Cooperation | Africa | --   | --       | --       |
| <i>L. torquatus</i>           | Cooperation | Cooperation | Africa | --   | --       | --       |
| <i>L. melanopterus</i>        | Suspected   | Cooperation | Africa | --   | --       | --       |
| <i>L. minor</i>               | Cooperation | Cooperation | Africa | --   | --       | --       |
| <i>L. bidentatus</i>          | Cooperation | Cooperation | Africa | --   | --       | --       |
| <i>L. dubius</i>              | Unknown     | Cooperation | Africa | --   | --       | --       |
| <i>L. rolleti</i>             | Suspected   | Cooperation | Africa | --   | --       | --       |

|                                 |             |             |             |          |          |          |
|---------------------------------|-------------|-------------|-------------|----------|----------|----------|
| <i>Trachyphonus purpuratus</i>  | Unknown     | Cooperation | Africa      | --       | --       | --       |
| <i>T. vaillantii</i>            | Pair        | Pair        | Africa      | --       | --       | --       |
| <i>T. margaritatus</i>          | Suspected   | Cooperation | Africa      | --       | --       | --       |
| <i>T. erythrocephalus</i>       | Cooperation | Cooperation | Africa      | --       | --       | --       |
| <i>T. darnaudii</i>             | Cooperation | Cooperation | Africa      | --       | --       | --       |
| <i>T. usambiro</i>              | Subspp      | Subspp      | Africa      | --       | --       | --       |
| <b>Piciformes: Ramphastidae</b> |             |             |             |          |          |          |
| <i>Capito aurovirens</i>        | Unknown     | Pair        | Neotropical | [81]     | bbaababb | [76, 82] |
| <i>C. maculicoronatus</i>       | Unknown     | Pair        | Neotropical | --       | --       | --       |
| <i>C. squamatus</i>             | Unknown     | Pair        | Neotropical | --       | --       | --       |
| <i>C. hypoleucus</i>            | Unknown     | Pair        | Neotropical | --       | --       | --       |
| <i>C. dayi</i>                  | Unknown     | Pair        | Neotropical | --       | --       | --       |
| <i>C. quinticolor</i>           | Pair        | Pair        | Neotropical | --       | --       | --       |
| <i>C. niger</i>                 | Pair        | Pair        | Neotropical | --       | --       | --       |
| <i>C. brunneipectus</i>         | Unknown     | Pair        | Neotropical | --       | --       | --       |
| <i>Eubucco richardsoni</i>      | Unknown     | Pair        | Neotropical | --       | --       | --       |
| <i>E. bourcierii</i>            | Pair        | Pair        | Neotropical | --       | --       | --       |
| <i>E. tucinkae</i>              | Unknown     | Pair        | Neotropical | --       | --       | --       |
| <i>E. versicolor</i>            | Unknown     | Pair        | Neotropical | --       | --       | --       |
| <i>Semnornis frantzii</i>       | Pair        | Pair        | Neotropical | --       | --       | --       |
| <i>S. ramphastinus</i>          | Cooperation | Cooperation | Neotropical | [81, 83] | --       | --       |
| <i>Aulacorhynchus prasinus</i>  | Pair        | Pair        | Neotropical | [81]     | --       | --       |
| <i>A. sulcatus</i>              | Unknown     | Pair        | Neotropical | --       | --       | --       |
| <i>A. derbianus</i>             | Unknown     | Pair        | Neotropical | --       | --       | --       |
| <i>A. haematopygus</i>          | Unknown     | Pair        | Neotropical | --       | --       | --       |
| <i>A. huallagae</i>             | Unknown     | Pair        | Neotropical | --       | --       | --       |
| <i>A. coeruleicinctis</i>       | Unknown     | Pair        | Neotropical | --       | --       | --       |
| <i>Pteroglossus inscriptus</i>  | Unknown     | Cooperation | Neotropical | --       | --       | --       |
| <i>P. viridis</i>               | Unknown     | Cooperation | Neotropical | --       | --       | --       |
| <i>P. bitorquatus</i>           | Unknown     | Cooperation | Neotropical | --       | --       | --       |
| <i>P. azara</i>                 | Subspp      | Subspp      | Neotropical | --       | --       | --       |
| <i>P. mariae</i>                | Unknown     | Cooperation | Neotropical | --       | --       | --       |
| <i>P. castanotis</i>            | Unknown     | Pair        | Neotropical | --       | --       | --       |
| <i>P. aracari</i>               | Unknown     | Pair        | Neotropical | --       | --       | --       |
| <i>P. torquatus</i>             | Cooperation | Cooperation | Neotropical | --       | --       | --       |
| <i>P. frantzii</i>              | Cooperation | Cooperation | Neotropical | --       | --       | --       |
| <i>P. sanguineus</i>            | Subspp      | Subspp      | Neotropical | --       | --       | --       |
| <i>P. erythrogygius</i>         | Subspp      | Subspp      | Neotropical | --       | --       | --       |
| <i>P. pluricinctus</i>          | Unknown     | Cooperation | Neotropical | --       | --       | --       |
| <i>P. beauharnaesii</i>         | Unknown     | Cooperation | Neotropical | --       | --       | --       |
| <i>Bailloni bailloni</i>        | Unknown     | Pair        | Neotropical | --       | --       | --       |
| <i>Andigena laminirostris</i>   | Pair        | Pair        | Neotropical | --       | --       | --       |
| <i>A. hypoglauca</i>            | Unknown     | Pair        | Neotropical | --       | --       | --       |



|                               |         |             |             |    |    |    |
|-------------------------------|---------|-------------|-------------|----|----|----|
| <i>A. cucullata</i>           | Unknown | Pair        | Neotropical | -- | -- | -- |
| <i>A. nigrirostris</i>        | Unknown | Pair        | Neotropical | -- | -- | -- |
| <i>Selenidera spectabilis</i> | Unknown | Cooperation | Neotropical | -- | -- | -- |
| <i>S. reinwardtii</i>         | Unknown | Pair        | Neotropical | -- | -- | -- |
| <i>S. nattereri</i>           | Unknown | Pair        | Neotropical | -- | -- | -- |
| <i>S. culik</i>               | Unknown | Cooperation | Neotropical | -- | -- | -- |
| <i>S. maculirostris</i>       | Unknown | Pair        | Neotropical | -- | -- | -- |
| <i>S. gouldii</i>             | Unknown | Pair        | Neotropical | -- | -- | -- |
| <i>Ramphastos sulfuratus</i>  | Pair    | Pair        | Neotropical | -- | -- | -- |
| <i>R. brevis</i>              | Unknown | Pair        | Neotropical | -- | -- | -- |
| <i>R. citreolaemus</i>        | Subspp  | Subspp      | Neotropical | -- | -- | -- |
| <i>R. culminatus</i>          | Subspp  | Subspp      | Neotropical | -- | -- | -- |
| <i>R. vitellinus</i>          | Pair    | Pair        | Neotropical | -- | -- | -- |
| <i>R. dicolorus</i>           | Pair    | Pair        | Neotropical | -- | -- | -- |
| <i>R. swainsonii</i>          | Subspp  | Subspp      | Neotropical | -- | -- | -- |
| <i>R. ambiguus</i>            | Unknown | Pair        | Neotropical | -- | -- | -- |
| <i>R. tucanus</i>             | Pair    | Pair        | Neotropical | -- | -- | -- |
| <i>R. cuvieri</i>             | Subspp  | Subspp      | Neotropical | -- | -- | -- |
| <i>R. toco</i>                | Pair    | Pair        | Neotropical | -- | -- | -- |

**Piciformes: Indicatoridae**

|                               |                |                |             |      |         |      |
|-------------------------------|----------------|----------------|-------------|------|---------|------|
| <i>Indicator maculatus</i>    | Brood parasite | Brood parasite | Africa      | [81] | bbaabba | [76] |
| <i>I. variegatus</i>          | Brood parasite | Brood parasite | Africa      | --   | --      | --   |
| <i>I. indicator</i>           | Brood parasite | Brood parasite | Africa      | --   | --      | --   |
| <i>I. archipelagicus</i>      | Unknown        | Brood parasite | Indomalayan | --   | --      | --   |
| <i>I. minor</i>               | Brood parasite | Brood parasite | Africa      | --   | --      | --   |
| <i>I. conirostris</i>         | Brood parasite | Brood parasite | Africa      | --   | --      | --   |
| <i>I. willcocksii</i>         | Brood parasite | Brood parasite | Africa      | --   | --      | --   |
| <i>I. exilis</i>              | Brood parasite | Brood parasite | Africa      | --   | --      | --   |
| <i>I. pumilio</i>             | Brood parasite | Brood parasite | Africa      | --   | --      | --   |
| <i>I. meliphilus</i>          | Brood parasite | Brood parasite | Africa      | --   | --      | --   |
| <i>I. xanthonotus</i>         | Unknown        | Brood parasite | Indomalayan | --   | --      | --   |
| <i>Melichneutes robustus</i>  | Brood parasite | Brood parasite | Africa      | --   | --      | --   |
| <i>Melignomon eisentrauti</i> | Brood parasite | Brood parasite | Africa      | --   | --      | --   |
| <i>M. zenkeri</i>             | Brood parasite | Brood parasite | Africa      | --   | --      | --   |
| <i>Prodotiscus insignis</i>   | Brood parasite | Brood parasite | Africa      | --   | --      | --   |
| <i>P. zambesiae</i>           | Brood parasite | Brood parasite | Africa      | --   | --      | --   |
| <i>P. regulus</i>             | Brood parasite | Brood parasite | Africa      | --   | --      | --   |

**Piciformes: Picidae: Jynaginae**

|                       |      |      |             |      |         |      |    |      |
|-----------------------|------|------|-------------|------|---------|------|----|------|
| <i>Jynx torquilla</i> | Pair | Pair | Palaearctic | [84] | bbaabbb | [76] | a  | [85] |
| <i>J. ruficollis</i>  | Pair | Pair | Africa      | --   | --      | --   | -- | --   |

**Piciformes: Picidae: Picumninae**

|                             |         |      |             |      |         |      |    |      |
|-----------------------------|---------|------|-------------|------|---------|------|----|------|
| <i>Picumnus innominatus</i> | Pair    | Pair | Indomalayan | [84] | bbaabbb | [76] | ba | [85] |
| <i>P. aurifrons</i>         | Unknown | Pair | Neotropical | --   | --      | --   | -- | --   |

|                             |         |      |             |    |    |    |    |    |
|-----------------------------|---------|------|-------------|----|----|----|----|----|
| <i>P. pumilus</i>           | Unknown | Pair | Neotropical | -- | -- | -- | -- | -- |
| <i>P. lafresnayi</i>        | Unknown | Pair | Neotropical | -- | -- | -- | -- | -- |
| <i>P. exilis</i>            | Unknown | Pair | Neotropical | -- | -- | -- | -- | -- |
| <i>P. fuscus</i>            | Unknown | Pair | Neotropical | -- | -- | -- | -- | -- |
| <i>P. sclateri</i>          | Unknown | Pair | Neotropical | -- | -- | -- | -- | -- |
| <i>P. squamulatus</i>       | Unknown | Pair | Neotropical | -- | -- | -- | -- | -- |
| <i>P. spilogaster</i>       | Unknown | Pair | Neotropical | -- | -- | -- | -- | -- |
| <i>P. minutissimus</i>      | Pair    | Pair | Neotropical | -- | -- | -- | -- | -- |
| <i>P. pygmaeus</i>          | Unknown | Pair | Neotropical | -- | -- | -- | -- | -- |
| <i>P. steindachneri</i>     | Unknown | Pair | Neotropical | -- | -- | -- | -- | -- |
| <i>P. varzeae</i>           | Unknown | Pair | Neotropical | -- | -- | -- | -- | -- |
| <i>P. cirratus</i>          | Unknown | Pair | Neotropical | -- | -- | -- | -- | -- |
| <i>P. dorbygnianus</i>      | Unknown | Pair | Neotropical | -- | -- | -- | -- | -- |
| <i>P. temminckii</i>        | Unknown | Pair | Neotropical | -- | -- | -- | -- | -- |
| <i>P. albosquamatus</i>     | Unknown | Pair | Neotropical | -- | -- | -- | -- | -- |
| <i>P. rufiventris</i>       | Unknown | Pair | Neotropical | -- | -- | -- | -- | -- |
| <i>P. fulvescens</i>        | Unknown | Pair | Neotropical | -- | -- | -- | -- | -- |
| <i>P. limae</i>             | Unknown | Pair | Neotropical | -- | -- | -- | -- | -- |
| <i>P. nebulosus</i>         | Unknown | Pair | Neotropical | -- | -- | -- | -- | -- |
| <i>P. castelnaui</i>        | Unknown | Pair | Neotropical | -- | -- | -- | -- | -- |
| <i>P. subtilis</i>          | Unknown | Pair | Neotropical | -- | -- | -- | -- | -- |
| <i>P. olivaceus</i>         | Pair    | Pair | Neotropical | -- | -- | -- | -- | -- |
| <i>P. granadensis</i>       | Unknown | Pair | Neotropical | -- | -- | -- | -- | -- |
| <i>P. cinnamomeus</i>       | Unknown | Pair | Neotropical | -- | -- | -- | -- | -- |
| <i>Sasia africana</i>       | Pair    | Pair | Neotropical | -- | -- | -- | -- | -- |
| <i>S. abnormis</i>          | Unknown | Pair | Indomalayan | -- | -- | -- | -- | -- |
| <i>S. ochracea</i>          | Unknown | Pair | Indomalayan | -- | -- | -- | -- | -- |
| <i>Nesocites micromegas</i> | Unknown | Pair | Neotropical | -- | -- | -- | -- | -- |

**Piciformes: Picidae: Picinae**

|                            |             |             |             |          |         |      |      |      |
|----------------------------|-------------|-------------|-------------|----------|---------|------|------|------|
| <i>Melanerpes candidus</i> | Suspected   | Cooperation | Neotropical | [84]     | bbaabbb | [76] | bbaa | [85] |
| <i>M. lewis</i>            | Occasional  | Pair        | Nearctic    | [84, 86] | --      | --   | --   | --   |
| <i>M. herminieri</i>       | Pair        | Pair        | Neotropical | [84]     | --      | --   | --   | --   |
| <i>M. portoricensis</i>    | Pair        | Pair        | Neotropical | --       | --      | --   | --   | --   |
| <i>M. erythrocephalus</i>  | Pair        | Pair        | Nearctic    | --       | --      | --   | --   | --   |
| <i>M. formicivorus</i>     | Cooperation | Cooperation | Neotropical | --       | --      | --   | --   | --   |
| <i>M. pucherani</i>        | Unknown     | Pair        | Neotropical | --       | --      | --   | --   | --   |
| <i>M. chrysauchen</i>      | Cooperation | Cooperation | Neotropical | --       | --      | --   | --   | --   |
| <i>M. cruentatus</i>       | Cooperation | Cooperation | Neotropical | --       | --      | --   | --   | --   |
| <i>M. flavifrons</i>       | Cooperation | Cooperation | Neotropical | --       | --      | --   | --   | --   |
| <i>M. cactorum</i>         | Cooperation | Cooperation | Neotropical | --       | --      | --   | --   | --   |
| <i>M. striatus</i>         | Suspected   | Cooperation | Neotropical | --       | --      | --   | --   | --   |
| <i>M. radiolatus</i>       | Pair        | Pair        | Neotropical | --       | --      | --   | --   | --   |
| <i>M. chrysogenys</i>      | Unknown     | Pair        | Neotropical | --       | --      | --   | --   | --   |

|                                |             |             |             |          |    |    |      |    |
|--------------------------------|-------------|-------------|-------------|----------|----|----|------|----|
| <i>M. hypopolius</i>           | Cooperation | Cooperation | Neotropical | --       | -- | -- | --   | -- |
| <i>M. pygmaeus</i>             | Unknown     | Pair        | Neotropical | --       | -- | -- | --   | -- |
| <i>M. rubricapillus</i>        | Pair        | Pair        | Neotropical | --       | -- | -- | --   | -- |
| <i>M. uropygialis</i>          | Pair        | Pair        | Neotropical | --       | -- | -- | --   | -- |
| <i>M. carolinus</i>            | Pair        | Pair        | Nearctic    | --       | -- | -- | --   | -- |
| <i>M. superciliaris</i>        | Pair        | Pair        | Neotropical | --       | -- | -- | --   | -- |
| <i>M. aurifrons</i>            | Pair        | Pair        | Neotropical | --       | -- | -- | --   | -- |
| <i>M. hoffmannii</i>           | Pair        | Pair        | Neotropical | --       | -- | -- | --   | -- |
| <i>Sphyrapticus varius</i>     | Pair        | Pair        | Nearctic    | --       | -- | -- | --   | -- |
| <i>S. nuchalis</i>             | Pair        | Pair        | Nearctic    | --       | -- | -- | --   | -- |
| <i>S. ruber</i>                | Occasional  | Pair        | Nearctic    | [84, 87] | -- | -- | --   | -- |
| <i>S. thyroideus</i>           | Occasional  | Pair        | Nearctic    | [84, 88] | -- | -- | --   | -- |
| <i>Xiphidiopicus percussus</i> | Pair        | Pair        | Neotropical | [84]     | -- | -- | --   | -- |
| <i>Dendropicos elachus</i>     | Unknown     | Pair        | Africa      | --       | -- | -- | bbab | -- |
| <i>D. poecilolaemus</i>        | Unknown     | Pair        | Africa      | --       | -- | -- | --   | -- |
| <i>D. abyssinicus</i>          | Unknown     | Pair        | Africa      | --       | -- | -- | --   | -- |
| <i>D. fuscescens</i>           | Pair        | Pair        | Africa      | --       | -- | -- | --   | -- |
| <i>D. lugubris</i>             | Unknown     | Pair        | Africa      | --       | -- | -- | --   | -- |
| <i>D. gabonensis</i>           | Unknown     | Pair        | Africa      | --       | -- | -- | --   | -- |
| <i>D. stierlingi</i>           | Unknown     | Pair        | Africa      | --       | -- | -- | --   | -- |
| <i>D. namaquus</i>             | Pair        | Pair        | Africa      | --       | -- | -- | --   | -- |
| <i>D. pyrrogaster</i>          | Unknown     | Pair        | Africa      | --       | -- | -- | --   | -- |
| <i>D. xantholophus</i>         | Unknown     | Pair        | Africa      | --       | -- | -- | --   | -- |
| <i>D. elliotii</i>             | Unknown     | Pair        | Africa      | --       | -- | -- | --   | -- |
| <i>D. goertae</i>              | Pair        | Pair        | Africa      | --       | -- | -- | --   | -- |
| <i>D. spodocephalus</i>        | Unknown     | Pair        | Africa      | --       | -- | -- | --   | -- |
| <i>D. griseocephalus</i>       | Cooperation | Cooperation | Africa      | --       | -- | -- | --   | -- |
| <i>D. obsoletus</i>            | Pair        | Pair        | Africa      | --       | -- | -- | --   | -- |
| <i>Dendrocopos temminckii</i>  | Unknown     | Pair        | Indomalayan | --       | -- | -- | --   | -- |
| <i>D. maculatus</i>            | Unknown     | Pair        | Indomalayan | --       | -- | -- | --   | -- |
| <i>D. nanus</i>                | Subspp      | Subspp      | Indomalayan | --       | -- | -- | --   | -- |
| <i>D. moluccensis</i>          | Unknown     | Pair        | Indomalayan | --       | -- | -- | --   | -- |
| <i>D. canicapillus</i>         | Pair        | Pair        | Indomalayan | --       | -- | -- | --   | -- |
| <i>D. kizuki</i>               | Occasional  | Pair        | Indomalayan | [84, 89] | -- | -- | --   | -- |
| <i>D. minor</i>                | Cooperation | Cooperation | Palaearctic | [84, 90] | -- | -- | --   | -- |
| <i>D. auriceps</i>             | Pair        | Pair        | Indomalayan | [84]     | -- | -- | --   | -- |
| <i>D. macei</i>                | Pair        | Pair        | Indomalayan | --       | -- | -- | --   | -- |
| <i>D. atratus</i>              | Unknown     | Pair        | Indomalayan | --       | -- | -- | --   | -- |
| <i>D. mahrattensis</i>         | Pair        | Pair        | Indomalayan | --       | -- | -- | --   | -- |
| <i>D. doriae</i>               | Pair        | Pair        | Palaearctic | --       | -- | -- | --   | -- |
| <i>D. hyperythrus</i>          | Pair        | Pair        | Palaearctic | --       | -- | -- | --   | -- |
| <i>D. cathpharius</i>          | Unknown     | Pair        | Palaearctic | --       | -- | -- | --   | -- |
| <i>D. darjellensis</i>         | Pair        | Pair        | Palaearctic | --       | -- | -- | --   | -- |

|                               |             |             |             |          |    |    |      |    |
|-------------------------------|-------------|-------------|-------------|----------|----|----|------|----|
| <i>D. medius</i>              | Occasional  | Pair        | Palaearctic | [84, 91] | -- | -- | --   | -- |
| <i>D. leucotos</i>            | Pair        | Pair        | Palaearctic | [84]     | -- | -- | --   | -- |
| <i>D. major</i>               | Occasional  | Pair        | Palaearctic | [84, 92] | -- | -- | --   | -- |
| <i>D. syriacus</i>            | Pair        | Pair        | Palaearctic | [84]     | -- | -- | --   | -- |
| <i>D. leucopterus</i>         | Unknown     | Pair        | Palaearctic | --       | -- | -- | --   | -- |
| <i>D. assimilis</i>           | Pair        | Pair        | Palaearctic | --       | -- | -- | --   | -- |
| <i>D. himalayensis</i>        | Pair        | Pair        | Palaearctic | --       | -- | -- | --   | -- |
| <i>Picoides lignarius</i>     | Unknown     | Pair        | Neotropical | --       | -- | -- | --   | -- |
| <i>P. mixtus</i>              | Unknown     | Pair        | Neotropical | --       | -- | -- | --   | -- |
| <i>P. nuttallii</i>           | Pair        | Pair        | Nearctic    | --       | -- | -- | --   | -- |
| <i>P. scalaris</i>            | Pair        | Pair        | Neotropical | --       | -- | -- | --   | -- |
| <i>P. pubescens</i>           | Cooperation | Cooperation | Nearctic    | [84, 93] | -- | -- | --   | -- |
| <i>P. borealis</i>            | Cooperation | Cooperation | Nearctic    | [84]     | -- | -- | --   | -- |
| <i>P. stricklandi</i>         | Pair        | Pair        | Neotropical | --       | -- | -- | --   | -- |
| <i>P. villosus</i>            | Pair        | Pair        | Nearctic    | --       | -- | -- | --   | -- |
| <i>P. albolarvatus</i>        | Pair        | Pair        | Nearctic    | --       | -- | -- | --   | -- |
| <i>P. tridactylus</i>         | Pair        | Pair        | Holarctic   | --       | -- | -- | --   | -- |
| <i>P. arcticus</i>            | Pair        | Pair        | Nearctic    | --       | -- | -- | --   | -- |
| <i>Veniliornis callonotus</i> | Unknown     | Pair        | Neotropical | --       | -- | -- | --   | -- |
| <i>V. dignus</i>              | Unknown     | Pair        | Neotropical | --       | -- | -- | --   | -- |
| <i>V. nigriceps</i>           | Unknown     | Pair        | Neotropical | --       | -- | -- | --   | -- |
| <i>V. fumigatus</i>           | Unknown     | Pair        | Neotropical | --       | -- | -- | --   | -- |
| <i>V. passerinus</i>          | Unknown     | Pair        | Neotropical | --       | -- | -- | --   | -- |
| <i>V. frontalis</i>           | Unknown     | Pair        | Neotropical | --       | -- | -- | --   | -- |
| <i>V. spilogaster</i>         | Unknown     | Pair        | Neotropical | --       | -- | -- | --   | -- |
| <i>V. sanguineus</i>          | Pair        | Pair        | Neotropical | --       | -- | -- | --   | -- |
| <i>V. kirkii</i>              | Unknown     | Pair        | Neotropical | --       | -- | -- | --   | -- |
| <i>V. chocoensis</i>          | Unknown     | Pair        | Neotropical | --       | -- | -- | --   | -- |
| <i>V. cassini</i>             | Unknown     | Pair        | Neotropical | --       | -- | -- | --   | -- |
| <i>V. affinis</i>             | Unknown     | Pair        | Neotropical | --       | -- | -- | --   | -- |
| <i>V. maculifrons</i>         | Unknown     | Pair        | Neotropical | --       | -- | -- | --   | -- |
| <i>Sapheopipo noguchii</i>    | Unknown     | Pair        | Palaearctic | --       | -- | -- | --   | -- |
| <i>Campephilus pollens</i>    | Unknown     | Pair        | Neotropical | --       | -- | -- | bbba | -- |
| <i>C. haematogaster</i>       | Unknown     | Pair        | Neotropical | --       | -- | -- | --   | -- |
| <i>C. rubricollis</i>         | Unknown     | Pair        | Neotropical | --       | -- | -- | --   | -- |
| <i>C. robustus</i>            | Unknown     | Pair        | Neotropical | --       | -- | -- | --   | -- |
| <i>C. guatemalensis</i>       | Pair        | Pair        | Neotropical | --       | -- | -- | --   | -- |
| <i>C. melanoleucos</i>        | Pair        | Pair        | Neotropical | --       | -- | -- | --   | -- |
| <i>C. gayaquilensis</i>       | Unknown     | Pair        | Neotropical | --       | -- | -- | --   | -- |
| <i>C. leucopogon</i>          | Unknown     | Pair        | Neotropical | --       | -- | -- | --   | -- |
| <i>C. magellanicus</i>        | Pair        | Pair        | Neotropical | [84, 94] | -- | -- | --   | -- |
| <i>C. imperialis</i>          | Unknown     | Pair        | Neotropical | [84]     | -- | -- | --   | -- |
| <i>C. principalis</i>         | Pair        | Pair        | Neotropical | --       | -- | -- | --   | -- |

|                                |             |             |             |          |    |    |          |    |
|--------------------------------|-------------|-------------|-------------|----------|----|----|----------|----|
| <i>Chrysocolaptes lucidus</i>  | Pair        | Pair        | Indomalayan | --       | -- | -- | --       | -- |
| <i>C. festivus</i>             | Pair        | Pair        | Indomalayan | --       | -- | -- | --       | -- |
| <i>Blythipicus rubiginosus</i> | Unknown     | Pair        | Indomalayan | --       | -- | -- | --       | -- |
| <i>B. pyrrhotis</i>            | Pair        | Pair        | Indomalayan | --       | -- | -- | --       | -- |
| <i>Reinwardtipicus validus</i> | Pair        | Pair        | Indomalayan | --       | -- | -- | --       | -- |
| <i>Geocolaptes olivaceus</i>   | Cooperation | Cooperation | Africa      | [84, 95] | -- | -- | bbbba    | -- |
| <i>Campethera punctuligera</i> | Pair        | Pair        | Africa      | [84]     | -- | -- | bbbbba   | -- |
| <i>C. nubica</i>               | Pair        | Pair        | Africa      | --       | -- | -- | --       | -- |
| <i>C. bennettii</i>            | Pair        | Pair        | Africa      | --       | -- | -- | --       | -- |
| <i>C. scriptoricauda</i>       | Unknown     | Pair        | Africa      | --       | -- | -- | --       | -- |
| <i>C. abingoni</i>             | Pair        | Pair        | Africa      | --       | -- | -- | --       | -- |
| <i>C. mombassica</i>           | Unknown     | Pair        | Africa      | --       | -- | -- | --       | -- |
| <i>C. notata</i>               | Pair        | Pair        | Africa      | --       | -- | -- | --       | -- |
| <i>C. maculosa</i>             | Unknown     | Pair        | Africa      | --       | -- | -- | --       | -- |
| <i>C. cailliautii</i>          | Pair        | Pair        | Africa      | --       | -- | -- | --       | -- |
| <i>C. tullbergi</i>            | Unknown     | Pair        | Africa      | --       | -- | -- | --       | -- |
| <i>C. nivosa</i>               | Unknown     | Pair        | Africa      | --       | -- | -- | --       | -- |
| <i>C. caroli</i>               | Unknown     | Pair        | Africa      | --       | -- | -- | --       | -- |
| <i>Picus mineaceus</i>         | Pair        | Pair        | Indomalayan | --       | -- | -- | --       | -- |
| <i>P. chlorolophus</i>         | Pair        | Pair        | Indomalayan | --       | -- | -- | --       | -- |
| <i>P. puniceus</i>             | Unknown     | Pair        | Indomalayan | --       | -- | -- | --       | -- |
| <i>P. flavinucha</i>           | Pair        | Pair        | Indomalayan | --       | -- | -- | --       | -- |
| <i>P. mentalis</i>             | Unknown     | Pair        | Indomalayan | --       | -- | -- | --       | -- |
| <i>P. viridanus</i>            | Unknown     | Pair        | Indomalayan | --       | -- | -- | --       | -- |
| <i>P. vittatus</i>             | Unknown     | Pair        | Indomalayan | --       | -- | -- | --       | -- |
| <i>P. xanthopygaeus</i>        | Pair        | Pair        | Indomalayan | --       | -- | -- | --       | -- |
| <i>P. squamatus</i>            | Pair        | Pair        | Indomalayan | --       | -- | -- | --       | -- |
| <i>P. awokera</i>              | Unknown     | Pair        | Palaearctic | --       | -- | -- | --       | -- |
| <i>P. viridis</i>              | Pair        | Pair        | Palaearctic | --       | -- | -- | --       | -- |
| <i>P. vaillantii</i>           | Subspp      | Subspp      | Palaearctic | --       | -- | -- | --       | -- |
| <i>P. rabieri</i>              | Unknown     | Pair        | Indomalayan | --       | -- | -- | --       | -- |
| <i>P. erythropygus</i>         | Unknown     | Pair        | Indomalayan | --       | -- | -- | --       | -- |
| <i>P. canus</i>                | Occasional  | Pair        | Palaearctic | [84, 96] | -- | -- | --       | -- |
| <i>Dinopium rafflesii</i>      | Pair        | Pair        | Indomalayan | [84]     | -- | -- | --       | -- |
| <i>D. shorii</i>               | Unknown     | Pair        | Indomalayan | --       | -- | -- | --       | -- |
| <i>D. javanense</i>            | Pair        | Pair        | Indomalayan | --       | -- | -- | --       | -- |
| <i>D. benghalense</i>          | Pair        | Pair        | Indomalayan | --       | -- | -- | --       | -- |
| <i>Meiglyptes tristis</i>      | Pair        | Pair        | Indomalayan | --       | -- | -- | --       | -- |
| <i>M. jugularis</i>            | Unknown     | Pair        | Indomalayan | --       | -- | -- | --       | -- |
| <i>M. tukki</i>                | Pair        | Pair        | Indomalayan | --       | -- | -- | --       | -- |
| <i>Mulleripicus fulvus</i>     | Unknown     | Cooperation | Indomalayan | --       | -- | -- | bbbbbbba | -- |
| <i>M. funebris</i>             | Unknown     | Cooperation | Indomalayan | --       | -- | -- | --       | -- |
| <i>M. pulverulentus</i>        | Cooperation | Cooperation | Indomalayan | [97]     | -- | -- | --       | -- |

|                                   |           |             |             |      |          |      |          |    |
|-----------------------------------|-----------|-------------|-------------|------|----------|------|----------|----|
| <i>Dryocopus galeatus</i>         | Unknown   | Pair        | Neotropical | [84] | --       | --   | --       | -- |
| <i>D. pileatus</i>                | Pair      | Pair        | Nearctic    | --   | --       | --   | --       | -- |
| <i>D. lineatus</i>                | Pair      | Pair        | Neotropical | --   | --       | --   | --       | -- |
| <i>D. schulzi</i>                 | Unknown   | Pair        | Neotropical | --   | --       | --   | --       | -- |
| <i>D. javensis</i>                | Pair      | Pair        | Indomalayan | --   | --       | --   | --       | -- |
| <i>D. hodgei</i>                  | Unknown   | Pair        | Indomalayan | --   | --       | --   | --       | -- |
| <i>D. martius</i>                 | Pair      | Pair        | Palaearctic | --   | --       | --   | --       | -- |
| <i>Piculus simplex</i>            | Unknown   | Pair        | Neotropical | --   | --       | --   | bbbbbbb  | -- |
| <i>P. callopterus</i>             | Unknown   | Pair        | Neotropical | --   | --       | --   | --       | -- |
| <i>P. litae</i>                   | Unknown   | Pair        | Neotropical | --   | --       | --   | --       | -- |
| <i>P. leucolaemus</i>             | Unknown   | Pair        | Neotropical | --   | --       | --   | --       | -- |
| <i>P. flavigula</i>               | Unknown   | Pair        | Neotropical | --   | --       | --   | --       | -- |
| <i>P. chrysochloros</i>           | Unknown   | Pair        | Neotropical | --   | --       | --   | --       | -- |
| <i>P. aurulentus</i>              | Unknown   | Pair        | Neotropical | --   | --       | --   | --       | -- |
| <i>P. auricularis</i>             | Unknown   | Pair        | Neotropical | --   | --       | --   | --       | -- |
| <i>P. rubiginosus</i>             | Pair      | Pair        | Neotropical | --   | --       | --   | --       | -- |
| <i>P. rivolii</i>                 | Unknown   | Pair        | Neotropical | --   | --       | --   | --       | -- |
| <i>Colaptes atricollis</i>        | Unknown   | Pair        | Neotropical | --   | --       | --   | --       | -- |
| <i>C. punctigula</i>              | Unknown   | Pair        | Neotropical | --   | --       | --   | --       | -- |
| <i>C. melanochloros</i>           | Pair      | Pair        | Neotropical | --   | --       | --   | --       | -- |
| <i>C. auratus</i>                 | Pair      | Pair        | Nearctic    | --   | --       | --   | --       | -- |
| <i>C. chrysoides</i>              | Pair      | Pair        | Nearctic    | --   | --       | --   | --       | -- |
| <i>C. fernandinae</i>             | Pair      | Pair        | Neotropical | --   | --       | --   | --       | -- |
| <i>C. pitius</i>                  | Unknown   | Cooperation | Neotropical | --   | --       | --   | --       | -- |
| <i>C. rupicola</i>                | Pair      | Pair        | Neotropical | --   | --       | --   | --       | -- |
| <i>C. campestris</i>              | Suspected | Cooperation | Neotropical | --   | --       | --   | --       | -- |
| <i>Celeus brachyurus</i>          | Pair      | Pair        | Indomalayan | --   | --       | --   | --       | -- |
| <i>C. loricatus</i>               | Unknown   | Pair        | Neotropical | --   | --       | --   | --       | -- |
| <i>C. grammicus</i>               | Unknown   | Pair        | Neotropical | --   | --       | --   | --       | -- |
| <i>C. undatus</i>                 | Unknown   | Pair        | Neotropical | --   | --       | --   | --       | -- |
| <i>C. castaneus</i>               | Unknown   | Pair        | Neotropical | --   | --       | --   | --       | -- |
| <i>C. elegans</i>                 | Unknown   | Pair        | Neotropical | --   | --       | --   | --       | -- |
| <i>C. lugubris</i>                | Unknown   | Pair        | Neotropical | --   | --       | --   | --       | -- |
| <i>C. flavescens</i>              | Unknown   | Pair        | Neotropical | --   | --       | --   | --       | -- |
| <i>C. flavus</i>                  | Unknown   | Pair        | Neotropical | --   | --       | --   | --       | -- |
| <i>C. spectabilis</i>             | Unknown   | Pair        | Neotropical | --   | --       | --   | --       | -- |
| <i>C. torquatus</i>               | Unknown   | Pair        | Neotropical | --   | --       | --   | --       | -- |
| <i>Gecinulus grantia</i>          | Unknown   | Pair        | Indomalayan | --   | --       | --   | Untested | -- |
| <i>G. viridis</i>                 | Unknown   | Pair        | Indomalayan | --   | --       | --   | --       | -- |
| <i>Hemicircus concretus</i>       | Unknown   | Pair        | Indomalayan | --   | --       | --   | --       | -- |
| <i>H. canente</i>                 | Unknown   | Pair        | Indomalayan | --   | --       | --   | --       | -- |
| <b>Coraciiformes: Bucerotidae</b> |           |             |             |      |          |      |          |    |
| <i>Tockus albocristatus</i>       | Pair      | Pair        | Africa      | [98] | bbabaaaa | [76] |          |    |

|                                 |             |             |             |           |    |    |
|---------------------------------|-------------|-------------|-------------|-----------|----|----|
| <i>T. hartlaubi</i>             | Pair        | Pair        | Africa      | --        | -- | -- |
| <i>T. camurus</i>               | Suspected   | Cooperation | Africa      | --        | -- | -- |
| <i>T. monteiri</i>              | Pair        | Pair        | Africa      | --        | -- | -- |
| <i>T. erythrorhynchus</i>       | Pair        | Pair        | Africa      | --        | -- | -- |
| <i>T. flavirostris</i>          | Pair        | Pair        | Africa      | --        | -- | -- |
| <i>T. leucomelas</i>            | Pair        | Pair        | Africa      | --        | -- | -- |
| <i>T. jacksoni</i>              | Subspp      | Subspp      | Africa      | --        | -- | -- |
| <i>T. deckeni</i>               | Pair        | Pair        | Africa      | --        | -- | -- |
| <i>T. alboterminatus</i>        | Occasional  | Pair        | Africa      | --        | -- | -- |
| <i>T. bradfieldi</i>            | Unknown     | Pair        | Africa      | --        | -- | -- |
| <i>T. fasciatus</i>             | Unknown     | Pair        | Africa      | --        | -- | -- |
| <i>T. hemprichii</i>            | Pair        | Pair        | Africa      | --        | -- | -- |
| <i>T. nasutus</i>               | Pair        | Pair        | Africa      | --        | -- | -- |
| <i>T. pallidirostris</i>        | Unknown     | Pair        | Africa      | --        | -- | -- |
| <i>Ocyrceros griseus</i>        | Pair        | Pair        | Indomalayan | --        | -- | -- |
| <i>O. gingalensis</i>           | Suspected   | Cooperation | Indomalayan | --        | -- | -- |
| <i>O. birostris</i>             | Suspected   | Cooperation | Indomalayan | --        | -- | -- |
| <i>Anthracosceros coronatus</i> | Pair        | Pair        | Indomalayan | --        | -- | -- |
| <i>A. albirostris</i>           | Pair        | Pair        | Indomalayan | --        | -- | -- |
| <i>A. malayanus</i>             | Cooperation | Cooperation | Indomalayan | --        | -- | -- |
| <i>A. marchei</i>               | Unknown     | Cooperation | Indomalayan | --        | -- | -- |
| <i>A. montani</i>               | Unknown     | Cooperation | Indomalayan | --        | -- | -- |
| <i>Buceros rhinoceros</i>       | Cooperation | Cooperation | Indomalayan | [98, 99]  | -- | -- |
| <i>B. bicornis</i>              | Pair        | Pair        | Indomalayan | [98]      | -- | -- |
| <i>B. hydrocorax</i>            | Cooperation | Cooperation | Indomalayan | --        | -- | -- |
| <i>B. vigil</i>                 | Pair        | Pair        | Indomalayan | --        | -- | -- |
| <i>Anorrhinus tickelli</i>      | Cooperation | Cooperation | Indomalayan | --        | -- | -- |
| <i>A. galeritus</i>             | Cooperation | Cooperation | Indomalayan | [98, 100] | -- | -- |
| <i>Penelopides manillae</i>     | Cooperation | Cooperation | Indomalayan | [98]      | -- | -- |
| <i>P. mindorensis</i>           | Unknown     | Cooperation | Indomalayan | --        | -- | -- |
| <i>P. panini</i>                | Suspected   | Cooperation | Indomalayan | --        | -- | -- |
| <i>P. samarensis</i>            | Subspp      | Subspp      | Indomalayan | --        | -- | -- |
| <i>P. affinis</i>               | Unknown     | Cooperation | Indomalayan | --        | -- | -- |
| <i>P. exarhatus</i>             | Cooperation | Cooperation | Indomalayan | --        | -- | -- |
| <i>Aceros comatus</i>           | Cooperation | Cooperation | Indomalayan | --        | -- | -- |
| <i>A. nipalensis</i>            | Pair        | Pair        | Indomalayan | --        | -- | -- |
| <i>A. corrugatus</i>            | Unknown     | Pair        | Indomalayan | --        | -- | -- |
| <i>A. waldeni</i>               | Unknown     | Pair        | Indomalayan | --        | -- | -- |
| <i>A. leucocephalus</i>         | Pair        | Pair        | Indomalayan | --        | -- | -- |
| <i>A. cassidix</i>              | Pair        | Pair        | Indomalayan | --        | -- | -- |
| <i>A. undulatus</i>             | Pair        | Pair        | Indomalayan | --        | -- | -- |
| <i>A. narcondami</i>            | Pair        | Pair        | Indomalayan | --        | -- | -- |
| <i>A. everetti</i>              | Pair        | Pair        | Australia   | --        | -- | -- |

|                                       |             |             |             |       |           |           |    |       |  |
|---------------------------------------|-------------|-------------|-------------|-------|-----------|-----------|----|-------|--|
| <i>A. subruficollis</i>               | Unknown     | Pair        | Indomalayan | --    | --        | --        |    |       |  |
| <i>A. plicatus</i>                    | Unknown     | Pair        | Australia   | --    | --        | --        |    |       |  |
| <i>Ceratogymna bucinator</i>          | Cooperation | Cooperation | Africa      | --    | --        | --        |    |       |  |
| <i>C. fistulator</i>                  | Unknown     | Cooperation | Africa      | --    | --        | --        |    |       |  |
| <i>C. brevis</i>                      | Pair        | Pair        | Africa      | --    | --        | --        |    |       |  |
| <i>C. subcylindricus</i>              | Pair        | Pair        | Africa      | --    | --        | --        |    |       |  |
| <i>C. cylindricus</i>                 | Unknown     | Pair        | Africa      | --    | --        | --        |    |       |  |
| <i>C. albotibialis</i>                | Subspp      | Subspp      | Africa      | --    | --        | --        |    |       |  |
| <i>C. atrata</i>                      | Cooperation | Cooperation | Africa      | --    | --        | --        |    |       |  |
| <i>C. elata</i>                       | Suspected   | Cooperation | Africa      | --    | --        | --        |    |       |  |
| <b>Coraciiformes: Bucorvidae</b>      |             |             |             |       |           |           |    |       |  |
| <i>Bucorvus abyssinicus</i>           | Suspected   | Cooperation | Africa      | [98]  | bbabaaab  | [76]      |    |       |  |
| <i>B. leadbeateri</i>                 | Cooperation | Cooperation | Africa      | --    | --        | --        |    |       |  |
| <b>Coraciiformes: Upupidae</b>        |             |             |             |       |           |           |    |       |  |
| <i>Upupa epops</i>                    | Cooperation | Cooperation | Palaearctic | [101] | bbabaaba  | [76, 102] |    |       |  |
| <i>U. africana</i>                    | Cooperation | Cooperation | Africa      | [103] | --        | --        |    |       |  |
| <b>Coraciiformes: Phoeniculidae</b>   |             |             |             |       |           |           |    |       |  |
| <i>Phoeniculus purpureus</i>          | Cooperation | Cooperation | Africa      | [104] | bbabaabba | [76, 102] |    |       |  |
| <i>P. damarensis</i>                  | Suspected   | Cooperation | Africa      | --    | --        | --        |    |       |  |
| <i>P. somaliensis</i>                 | Suspected   | Cooperation | Africa      | --    | --        | --        |    |       |  |
| <i>P. bollei</i>                      | Cooperation | Cooperation | Africa      | --    | --        | --        |    |       |  |
| <i>P. castaneiceps</i>                | Unknown     | Cooperation | Africa      | --    | --        | --        |    |       |  |
| <b>Coraciiformes: Rhinopomastidae</b> |             |             |             |       |           |           |    |       |  |
| <i>Rhinopomastus aterrimus</i>        | Pair        | Pair        | Africa      | [104] | bbabaabbb | [76, 102] |    |       |  |
| <i>R. cyanomelas</i>                  | Pair        | Pair        | Africa      | --    | --        | --        |    |       |  |
| <i>R. minor</i>                       | Pair        | Pair        | Africa      | --    | --        | --        |    |       |  |
| <b>Coraciiformes: Trogonidae</b>      |             |             |             |       |           |           |    |       |  |
| <i>Euptilotis neoxenus</i>            | Unknown     | Pair        | Neotropical | [105] | bbabab    | [76]      | aa | [106] |  |
| <i>Pharomachrus mocinno</i>           | Pair        | Pair        | Neotropical | --    | --        | --        | ab | --    |  |
| <i>P. antisianus</i>                  | Unknown     | Pair        | Neotropical | --    | --        | --        | -- | --    |  |
| <i>P. fulgidus</i>                    | Unknown     | Pair        | Neotropical | --    | --        | --        | -- | --    |  |
| <i>P. auriceps</i>                    | Unknown     | Pair        | Neotropical | --    | --        | --        | -- | --    |  |
| <i>P. pavoninus</i>                   | Unknown     | Pair        | Neotropical | --    | --        | --        | -- | --    |  |
| <i>Priotelus temnurus</i>             | Unknown     | Pair        | Neotropical | --    | --        | --        | ba | --    |  |
| <i>P. roseigaster</i>                 | Unknown     | Pair        | Neotropical | --    | --        | --        | -- | --    |  |
| <i>Trogon massena</i>                 | Pair        | Pair        | Neotropical | --    | --        | --        | ba | --    |  |
| <i>T. melanurus</i>                   | Unknown     | Pair        | Neotropical | --    | --        | --        | -- | --    |  |
| <i>T. clathratus</i>                  | Unknown     | Pair        | Neotropical | --    | --        | --        | -- | --    |  |
| <i>T. comptus</i>                     | Unknown     | Pair        | Neotropical | --    | --        | --        | -- | --    |  |
| <i>T. bairdii</i>                     | Pair        | Pair        | Neotropical | --    | --        | --        | -- | --    |  |
| <i>T. viridis</i>                     | Pair        | Pair        | Neotropical | --    | --        | --        | -- | --    |  |
| <i>T. citreolus</i>                   | Unknown     | Pair        | Neotropical | --    | --        | --        | -- | --    |  |
| <i>T. melanocephalus</i>              | Pair        | Pair        | Neotropical | --    | --        | --        | -- | --    |  |



|                              |         |        |             |    |    |    |      |    |
|------------------------------|---------|--------|-------------|----|----|----|------|----|
| <i>T. mexicanus</i>          | Pair    | Pair   | Neotropical | -- | -- | -- | --   | -- |
| <i>T. elegans</i>            | Pair    | Pair   | Neotropical | -- | -- | -- | --   | -- |
| <i>T. collaris</i>           | Pair    | Pair   | Neotropical | -- | -- | -- | --   | -- |
| <i>T. aurantiiventris</i>    | Subspp  | Subspp | Neotropical | -- | -- | -- | --   | -- |
| <i>T. personatus</i>         | Unknown | Pair   | Neotropical | -- | -- | -- | --   | -- |
| <i>T. rufus</i>              | Pair    | Pair   | Neotropical | -- | -- | -- | --   | -- |
| <i>T. surrucura</i>          | Unknown | Pair   | Neotropical | -- | -- | -- | --   | -- |
| <i>T. curucui</i>            | Pair    | Pair   | Neotropical | -- | -- | -- | --   | -- |
| <i>T. violaceus</i>          | Unknown | Pair   | Neotropical | -- | -- | -- | --   | -- |
| <i>Apaloderma narina</i>     | Pair    | Pair   | Africa      | -- | -- | -- | bbba | -- |
| <i>A. aequatoriale</i>       | Pair    | Pair   | Africa      | -- | -- | -- | --   | -- |
| <i>A. vittatum</i>           | Unknown | Pair   | Africa      | -- | -- | -- | --   | -- |
| <i>Harpactes reinwardtii</i> | Unknown | Pair   | Indomalayan | -- | -- | -- | bbbb | -- |
| <i>H. fasciatus</i>          | Unknown | Pair   | Indomalayan | -- | -- | -- | --   | -- |
| <i>H. kasumba</i>            | Unknown | Pair   | Indomalayan | -- | -- | -- | --   | -- |
| <i>H. diardii</i>            | Unknown | Pair   | Indomalayan | -- | -- | -- | --   | -- |
| <i>H. ardens</i>             | Unknown | Pair   | Indomalayan | -- | -- | -- | --   | -- |
| <i>H. whiteheadi</i>         | Unknown | Pair   | Indomalayan | -- | -- | -- | --   | -- |
| <i>H. orrhophaeus</i>        | Unknown | Pair   | Indomalayan | -- | -- | -- | --   | -- |
| <i>H. duvaucelii</i>         | Unknown | Pair   | Indomalayan | -- | -- | -- | --   | -- |
| <i>H. oreskios</i>           | Unknown | Pair   | Indomalayan | -- | -- | -- | --   | -- |
| <i>H. erythrocephalus</i>    | Unknown | Pair   | Indomalayan | -- | -- | -- | --   | -- |
| <i>H. wardi</i>              | Unknown | Pair   | Indomalayan | -- | -- | -- | --   | -- |

**Coraciiformes: Coraciidae**

|                             |            |             |             |       |          |      |
|-----------------------------|------------|-------------|-------------|-------|----------|------|
| <i>Coracias garrulus</i>    | Occasional | Pair        | Palaearctic | [107] | bbabbaaa | [76] |
| <i>C. abyssinica</i>        | Group      | Pair        | Africa      | [108] | --       | --   |
| <i>C. caudata</i>           | Pair       | Pair        | Africa      | [109] | --       | --   |
| <i>C. spatulata</i>         | Unknown    | Pair        | Africa      | --    | --       | --   |
| <i>C. naevia</i>            | Pair       | Pair        | Africa      | --    | --       | --   |
| <i>C. benghalensis</i>      | Pair       | Pair        | Indomalayan | --    | --       | --   |
| <i>C. temminckii</i>        | Unknown    | Pair        | Indomalayan | --    | --       | --   |
| <i>C. cyanogaster</i>       | Suspected  | Cooperation | Africa      | --    | --       | --   |
| <i>Eurystomus glaucurus</i> | Pair       | Pair        | Africa      | --    | --       | --   |
| <i>E. gularis</i>           | Pair       | Pair        | Africa      | --    | --       | --   |
| <i>E. orientalis</i>        | Pair       | Pair        | Widespread  | --    | --       | --   |
| <i>E. azureus</i>           | Unknown    | Pair        | Australia   | --    | --       | --   |

**Coraciiformes: Brachypteraciidae**

|                                   |         |      |        |       |          |      |
|-----------------------------------|---------|------|--------|-------|----------|------|
| <i>Brachypteracias leptosomus</i> | Pair    | Pair | Africa | [110] | bbabbaab | [76] |
| <i>B. squamigera</i>              | Pair    | Pair | Africa | --    | --       | --   |
| <i>Atelornis pittoides</i>        | Pair    | Pair | Africa | --    | --       | --   |
| <i>A. crossleyi</i>               | Unknown | Pair | Africa | --    | --       | --   |
| <i>Uratelornis chimaera</i>       | Unknown | Pair | Africa | --    | --       | --   |

**Coraciiformes: Leptosomidae**

|                                   |             |             |             |            |           |      |              |       |
|-----------------------------------|-------------|-------------|-------------|------------|-----------|------|--------------|-------|
| <i>Leptosomus discolor</i>        | Pair        | Pair        | Africa      | [111]      | bbabbab   | [76] |              |       |
| <b>Coraciiformes: Meropidae</b>   |             |             |             |            |           |      |              |       |
| <i>Nyctyornis amictus</i>         | Pair        | Pair        | Indomalayan | [112]      | bbabbba   | [76] | a            | [113] |
| <i>N. athertoni</i>               | Pair        | Pair        | Indomalayan | --         | --        | --   | --           | --    |
| <i>Merops forsteni</i>            | Cooperation | Cooperation | Indomalayan | [113]      | --        | --   | baaaaaaaaaa  | --    |
| <i>M. gularis</i>                 | Unknown     | Cooperation | Africa      | [112]      | --        | --   | --           | --    |
| <i>M. muelleri</i>                | Cooperation | Cooperation | Africa      | [114]      | --        | --   | --           | --    |
| <i>M. breweri</i>                 | Cooperation | Cooperation | Africa      | [112]      | --        | --   | --           | --    |
| <i>M. pusillus</i>                | Cooperation | Cooperation | Africa      | [115, 116] | --        | --   | baaaaaaaaaab | --    |
| <i>M. variegatus</i>              | Pair        | Pair        | Africa      | [114]      | --        | --   | --           | --    |
| <i>M. oreobates</i>               | Cooperation | Cooperation | Africa      | [112]      | --        | --   | --           | --    |
| <i>M. bulocki</i>                 | Cooperation | Cooperation | Africa      | --         | --        | --   | baaaaaaaab   | --    |
| <i>M. bullockoides</i>            | Cooperation | Cooperation | Africa      | --         | --        | --   | baaaaaaab    | --    |
| <i>M. malimbicus</i>              | Suspected   | Cooperation | Africa      | [116]      | --        | --   | baaaaaaab    | --    |
| <i>M. nubicus</i>                 | Suspected   | Cooperation | Africa      | --         | --        | --   | --           | --    |
| <i>M. nubicoides</i>              | Subspp      | Subspp      | Africa      | [112]      | --        | --   | --           | --    |
| <i>M. revoilii</i>                | Pair        | Pair        | Africa      | [113]      | --        | --   | baaaaaab     | --    |
| <i>M. albicollis</i>              | Cooperation | Cooperation | Africa      | [112]      | --        | --   | baaaaaab     | --    |
| <i>M. hirundineus</i>             | Cooperation | Cooperation | Africa      | [114]      | --        | --   | baaaab       | --    |
| <i>M. ornatus</i>                 | Cooperation | Cooperation | Australia   | [117]      | --        | --   | --           | --    |
| <i>M. boehmi</i>                  | Pair        | Pair        | Africa      | [112]      | --        | --   | baaab        | --    |
| <i>M. viridis</i>                 | Suspected   | Cooperation | Indomalayan | [114]      | --        | --   | --           | --    |
| <i>M. apiaster</i>                | Cooperation | Cooperation | Widespread  | [112]      | --        | --   | --           | --    |
| <i>M. leschenaulti</i>            | Cooperation | Cooperation | Indomalayan | [118]      | --        | --   | --           | --    |
| <i>M. superciliosus</i>           | Cooperation | Cooperation | Africa      | [113]      | --        | --   | baab         | --    |
| <i>M. philippinus</i>             | Cooperation | Cooperation | Indomalayan | [118]      | --        | --   | --           | --    |
| <i>M. persicus</i>                | Suspected   | Cooperation | Palaearctic | --         | --        | --   | bab          | --    |
| <i>M. orientalis</i>              | Cooperation | Cooperation | Widespread  | [118, 119] | --        | --   | bb           | --    |
| <b>Coraciiformes: Cerylidae</b>   |             |             |             |            |           |      |              |       |
| <i>Megaceryle maxima</i>          | Pair        | Pair        | Neotropical | [120]      | bbabbbbaa | [76] |              |       |
| <i>M. lugubris</i>                | Pair        | Pair        | Palaearctic | --         | --        | --   |              |       |
| <i>M. alcyon</i>                  | Occasional  | Pair        | Nearctic    | [120, 121] | --        | --   |              |       |
| <i>M. torquata</i>                | Pair        | Pair        | Neotropical | [120]      | --        | --   |              |       |
| <i>Ceryle rudis</i>               | Cooperation | Cooperation | Widespread  | --         | --        | --   |              |       |
| <i>Chloroceryle amazona</i>       | Pair        | Pair        | Neotropical | --         | --        | --   |              |       |
| <i>C. americana</i>               | Pair        | Pair        | Neotropical | --         | --        | --   |              |       |
| <i>C. inda</i>                    | Unknown     | Pair        | Neotropical | --         | --        | --   |              |       |
| <i>C. aenea</i>                   | Pair        | Pair        | Neotropical | --         | --        | --   |              |       |
| <b>Coraciiformes: Dacelonidae</b> |             |             |             |            |           |      |              |       |
| <i>Lacedo pulchella</i>           | Unknown     | Pair        | Indomalayan | [120]      | bbabbbaba | [76] |              |       |
| <i>Dacelo novaeguineae</i>        | Cooperation | Cooperation | Australia   | --         | --        | --   |              |       |
| <i>D. leachii</i>                 | Cooperation | Cooperation | Australia   | --         | --        | --   |              |       |
| <i>D. tyro</i>                    | Suspected   | Cooperation | Australia   | --         | --        | --   |              |       |

|                                  |             |             |             |            |    |    |
|----------------------------------|-------------|-------------|-------------|------------|----|----|
| <i>D. gaudichaud</i>             | Pair        | Pair        | Australia   | --         | -- | -- |
| <i>Clytoceyx rex</i>             | Unknown     | Pair        | Australia   | --         | -- | -- |
| <i>Cittura cyanotis</i>          | Unknown     | Pair        | Indomalayan | --         | -- | -- |
| <i>Pelargopsis amauropterus</i>  | Unknown     | Pair        | Indomalayan | --         | -- | -- |
| <i>P. capensis</i>               | Pair        | Pair        | Indomalayan | --         | -- | -- |
| <i>P. melanorhyncha</i>          | Unknown     | Pair        | Indomalayan | --         | -- | -- |
| <i>Halcyon coromanda</i>         | Pair        | Pair        | Indomalayan | --         | -- | -- |
| <i>H. badia</i>                  | Pair        | Pair        | Africa      | --         | -- | -- |
| <i>H. smyrnensis</i>             | Pair        | Pair        | Indomalayan | --         | -- | -- |
| <i>H. pileata</i>                | Pair        | Pair        | Indomalayan | --         | -- | -- |
| <i>H. cyanoventris</i>           | Pair        | Pair        | Indomalayan | --         | -- | -- |
| <i>H. leucocephala</i>           | Pair        | Pair        | Africa      | --         | -- | -- |
| <i>H. senegalensis</i>           | Pair        | Pair        | Africa      | --         | -- | -- |
| <i>H. senegaloides</i>           | Pair        | Pair        | Africa      | --         | -- | -- |
| <i>H. malimbica</i>              | Pair        | Pair        | Africa      | --         | -- | -- |
| <i>H. albiventris</i>            | Pair        | Pair        | Africa      | --         | -- | -- |
| <i>H. chelicuti</i>              | Cooperation | Cooperation | Africa      | [122]      | -- | -- |
| <i>Todirhamphus nigrocyaneus</i> | Unknown     | Cooperation | Australia   | [120]      | -- | -- |
| <i>T. winchelli</i>              | Unknown     | Cooperation | Indomalayan | --         | -- | -- |
| <i>T. diops</i>                  | Unknown     | Cooperation | Australia   | --         | -- | -- |
| <i>T. lazuli</i>                 | Unknown     | Cooperation | Australia   | --         | -- | -- |
| <i>T. macleayi</i>               | Cooperation | Cooperation | Australia   | --         | -- | -- |
| <i>T. albonotatus</i>            | Pair        | Pair        | Australia   | --         | -- | -- |
| <i>T. leucopygius</i>            | Unknown     | Pair        | Australia   | --         | -- | -- |
| <i>T. farquhari</i>              | Unknown     | Pair        | Australia   | --         | -- | -- |
| <i>T. pyrrhopygia</i>            | Pair        | Pair        | Australia   | --         | -- | -- |
| <i>T. recurvirostris</i>         | Subspp      | Subspp      | Australia   | --         | -- | -- |
| <i>T. cinnamominus</i>           | Cooperation | Cooperation | Australia   | [123]      | -- | -- |
| <i>T. funebris</i>               | Unknown     | Pair        | Australia   | [120]      | -- | -- |
| <i>T. chloris</i>                | Occasional  | Pair        | Widespread  | [120, 124] | -- | -- |
| <i>T. enigma</i>                 | Unknown     | Pair        | Australia   | [120]      | -- | -- |
| <i>T. saurophaga</i>             | Unknown     | Pair        | Australia   | [120, 125] | -- | -- |
| <i>T. australasia</i>            | Unknown     | Pair        | Australia   | [120]      | -- | -- |
| <i>T. sanctus</i>                | Pair        | Pair        | Australia   | --         | -- | -- |
| <i>T. veneratus</i>              | Unknown     | Pair        | Australia   | --         | -- | -- |
| <i>T. ruficollaris</i>           | Subspp      | Subspp      | Australia   | --         | -- | -- |
| <i>T. tuta</i>                   | Cooperation | Cooperation | Australia   | --         | -- | -- |
| <i>T. godeffroyi</i>             | Unknown     | Cooperation | Australia   | --         | -- | -- |
| <i>T. gambieri</i>               | Unknown     | Cooperation | Australia   | --         | -- | -- |
| <i>Caridonax fulgidus</i>        | Unknown     | Pair        | Australia   | --         | -- | -- |
| <i>Melidora macrorrhina</i>      | Pair        | Pair        | Australia   | --         | -- | -- |
| <i>Actenoides bougainvillei</i>  | Unknown     | Pair        | Australia   | --         | -- | -- |
| <i>A. concretus</i>              | Unknown     | Pair        | Indomalayan | --         | -- | -- |

|                                   |             |             |             |       |           |      |
|-----------------------------------|-------------|-------------|-------------|-------|-----------|------|
| <i>A. lindsayi</i>                | Unknown     | Pair        | Indomalayan | --    | --        | --   |
| <i>A. hombroni</i>                | Unknown     | Pair        | Indomalayan | --    | --        | --   |
| <i>A. monachus</i>                | Unknown     | Pair        | Indomalayan | --    | --        | --   |
| <i>A. princeps</i>                | Unknown     | Pair        | Indomalayan | --    | --        | --   |
| <i>Syma torotoro</i>              | Pair        | Pair        | Australia   | --    | --        | --   |
| <i>S. megarhyncha</i>             | Unknown     | Pair        | Australia   | --    | --        | --   |
| <i>Tanysiptera hydrocharis</i>    | Unknown     | Pair        | Australia   | --    | --        | --   |
| <i>T. galatea</i>                 | Pair        | Pair        | Australia   | --    | --        | --   |
| <i>T. ellioti</i>                 | Unknown     | Pair        | Australia   | --    | --        | --   |
| <i>T. riedelii</i>                | Unknown     | Pair        | Australia   | --    | --        | --   |
| <i>T. carolinae</i>               | Unknown     | Pair        | Australia   | --    | --        | --   |
| <i>T. nymphea</i>                 | Unknown     | Pair        | Australia   | --    | --        | --   |
| <i>T. danae</i>                   | Unknown     | Pair        | Australia   | --    | --        | --   |
| <i>T. sylvia</i>                  | Cooperation | Cooperation | Australia   | --    | --        | --   |
| <b>Coraciiformes: Alcedinidae</b> |             |             |             |       |           |      |
| <i>Alcedo hercules</i>            | Pair        | Pair        | Indomalayan | [120] | bbabbbabb | [76] |
| <i>A. atthis</i>                  | Occasional  | Pair        | Widespread  | --    | --        | --   |
| <i>A. semitorquata</i>            | Pair        | Pair        | Africa      | --    | --        | --   |
| <i>A. quadribrachys</i>           | Pair        | Pair        | Africa      | --    | --        | --   |
| <i>A. meninting</i>               | Pair        | Pair        | Indomalayan | --    | --        | --   |
| <i>A. azurea</i>                  | Pair        | Pair        | Australia   | --    | --        | --   |
| <i>A. websteri</i>                | Unknown     | Pair        | Australia   | --    | --        | --   |
| <i>A. euryzona</i>                | Unknown     | Pair        | Indomalayan | --    | --        | --   |
| <i>A. cyanopecta</i>              | Unknown     | Pair        | Indomalayan | --    | --        | --   |
| <i>A. argentata</i>               | Unknown     | Pair        | Indomalayan | --    | --        | --   |
| <i>A. cristata</i>                | Pair        | Pair        | Africa      | --    | --        | --   |
| <i>A. vintsioides</i>             | Pair        | Pair        | Africa      | --    | --        | --   |
| <i>A. thomensis</i>               | Unknown     | Pair        | Africa      | --    | --        | --   |
| <i>A. nais</i>                    | Unknown     | Pair        | Africa      | --    | --        | --   |
| <i>A. leucogaster</i>             | Unknown     | Pair        | Africa      | --    | --        | --   |
| <i>A. coerulescens</i>            | Pair        | Pair        | Indomalayan | --    | --        | --   |
| <i>A. pusilla</i>                 | Pair        | Pair        | Australia   | --    | --        | --   |
| <i>Ceyx lepidus</i>               | Unknown     | Pair        | Australia   | --    | --        | --   |
| <i>C. erithacus</i>               | Pair        | Pair        | Indomalayan | --    | --        | --   |
| <i>C. rufidorsa</i>               | Subspp      | Subspp      | Indomalayan | --    | --        | --   |
| <i>C. melanurus</i>               | Unknown     | Pair        | Indomalayan | --    | --        | --   |
| <i>C. fallax</i>                  | Unknown     | Pair        | Indomalayan | --    | --        | --   |
| <i>Ispidina madagascariensis</i>  | Pair        | Pair        | Africa      | --    | --        | --   |
| <i>I. picta</i>                   | Pair        | Pair        | Africa      | --    | --        | --   |
| <i>I. lecontei</i>                | Pair        | Pair        | Africa      | --    | --        | --   |
| <b>Coraciiformes: Momotidae</b>   |             |             |             |       |           |      |
| <i>Hylomanes momotula</i>         | Unknown     | Pair        | Neotropical | [126] | bbabbbba  | [76] |
| <i>Aspatha gularis</i>            | Pair        | Pair        | Neotropical | --    | --        | --   |

|                                               |                |                |             |       |           |       |     |       |
|-----------------------------------------------|----------------|----------------|-------------|-------|-----------|-------|-----|-------|
| <i>Electron platyrhynchum</i>                 | Pair           | Pair           | Neotropical | --    | --        | --    |     |       |
| <i>E. carinatum</i>                           | Unknown        | Pair           | Neotropical | --    | --        | --    |     |       |
| <i>Eumomota superciliosa</i>                  | Pair           | Pair           | Neotropical | --    | --        | --    |     |       |
| <i>Baryphthengus martii</i>                   | Pair           | Pair           | Neotropical | --    | --        | --    |     |       |
| <i>B. ruficapillus</i>                        | Pair           | Pair           | Neotropical | --    | --        | --    |     |       |
| <i>Momotus mexicanus</i>                      | Unknown        | Pair           | Neotropical | --    | --        | --    |     |       |
| <i>M. momota</i>                              | Pair           | Pair           | Neotropical | --    | --        | --    |     |       |
| <b>Coraciiformes: Todidae</b>                 |                |                |             |       |           |       |     |       |
| <i>Todus multicolor</i>                       | Unknown        | Cooperation    | Neotropical | [127] | bbabbbbbb | [76]  |     |       |
| <i>T. angustirostris</i>                      | Unknown        | Cooperation    | Neotropical | --    | --        | --    |     |       |
| <i>T. mexicanus</i>                           | Cooperation    | Cooperation    | Neotropical | --    | --        | --    |     |       |
| <i>T. todus</i>                               | Unknown        | Cooperation    | Neotropical | --    | --        | --    |     |       |
| <i>T. subulatus</i>                           | Unknown        | Cooperation    | Neotropical | --    | --        | --    |     |       |
| <b>Coliiformes: Coliidae</b>                  |                |                |             |       |           |       |     |       |
| <i>Colius striatus</i>                        | Cooperation    | Cooperation    | Africa      | [128] | bbac      | [3]   |     |       |
| <i>C. leucocephalus</i>                       | Suspected      | Cooperation    | Africa      | --    | --        | --    |     |       |
| <i>C. castanotus</i>                          | Suspected      | Cooperation    | Africa      | --    | --        | --    |     |       |
| <i>C. colius</i>                              | Cooperation    | Cooperation    | Africa      | --    | --        | --    |     |       |
| <i>Urocolius macrourus</i>                    | Suspected      | Cooperation    | Africa      | --    | --        | --    |     |       |
| <i>U. indicus</i>                             | Cooperation    | Cooperation    | Africa      | --    | --        | --    |     |       |
| <b>Cuculiformes: Cuculidae: Crotophaginae</b> |                |                |             |       |           |       |     |       |
| <i>Guira guira</i>                            | Cooperation    | Cooperation    | Neotropical | [129] | bbba      | [130] | aa  | [130] |
| <i>Crotophaga major</i>                       | Cooperation    | Cooperation    | Neotropical | --    | --        | --    | --  | --    |
| <i>C. ani</i>                                 | Cooperation    | Cooperation    | Neotropical | --    | --        | --    | --  | --    |
| <i>C. sulcirostris</i>                        | Cooperation    | Cooperation    | Neotropical | --    | --        | --    | --  | --    |
| <b>Cuculiformes: Cuculidae: Neomorhinae</b>   |                |                |             |       |           |       |     |       |
| <i>Tapera naevia</i>                          | Brood parasite | Brood parasite | Neotropical | [129] | bbba      | [130] | aba | [130] |
| <i>Dromococcyx phasianellus</i>               | Brood parasite | Brood parasite | Neotropical | --    | --        | --    | --  | --    |
| <i>D. pavoninus</i>                           | Brood parasite | Brood parasite | Neotropical | --    | --        | --    | --  | --    |
| <i>Morococcyx erythropygus</i>                | Pair           | Pair           | Neotropical | --    | --        | --    | abb | --    |
| <i>Geococcyx californianus</i>                | Pair           | Pair           | Neotropical | --    | --        | --    | --  | --    |
| <i>G. velox</i>                               | Pair           | Pair           | Neotropical | --    | --        | --    | --  | --    |
| <i>Neomorphus radiolosus</i>                  | Unknown        | Pair           | Neotropical | --    | --        | --    | --  | --    |
| <i>N. rufipennis</i>                          | Unknown        | Pair           | Neotropical | --    | --        | --    | --  | --    |
| <i>N. pucheranii</i>                          | Pair           | Pair           | Neotropical | --    | --        | --    | --  | --    |
| <i>N. geoffroyi</i>                           | Pair           | Pair           | Neotropical | --    | --        | --    | --  | --    |
| <i>N. squamiger</i>                           | Subspp         | Subspp         | Neotropical | --    | --        | --    | --  | --    |
| <b>Cuculiformes: Cuculidae: Centropodinae</b> |                |                |             |       |           |       |     |       |
| <i>Centropus milo</i>                         | Unknown        | Pair           | Australia   | [129] | bbba      | [130] | baa | [130] |
| <i>C. ateralbus</i>                           | Unknown        | Pair           | Australia   | --    | --        | --    | --  | --    |
| <i>C. menbeki</i>                             | Unknown        | Pair           | Australia   | --    | --        | --    | --  | --    |
| <i>C. chalybeus</i>                           | Unknown        | Pair           | Australia   | --    | --        | --    | --  | --    |
| <i>C. unirufus</i>                            | Unknown        | Pair           | Indomalayan | --    | --        | --    | --  | --    |

|                          |           |           |             |            |    |    |    |    |
|--------------------------|-----------|-----------|-------------|------------|----|----|----|----|
| <i>C. chlororhynchus</i> | Pair      | Pair      | Indomalayan | --         | -- | -- | -- | -- |
| <i>C. melanops</i>       | Unknown   | Pair      | Indomalayan | --         | -- | -- | -- | -- |
| <i>C. steerii</i>        | Unknown   | Pair      | Indomalayan | --         | -- | -- | -- | -- |
| <i>C. rectunguis</i>     | Pair      | Pair      | Indomalayan | --         | -- | -- | -- | -- |
| <i>C. celebensis</i>     | Unknown   | Pair      | Indomalayan | --         | -- | -- | -- | -- |
| <i>C. anselli</i>        | Unknown   | Pair      | Africa      | --         | -- | -- | -- | -- |
| <i>C. neumanni</i>       | Subspp    | Subspp    | Africa      | --         | -- | -- | -- | -- |
| <i>C. leucogaster</i>    | Unknown   | Pair      | Africa      | --         | -- | -- | -- | -- |
| <i>C. senegalensis</i>   | Pair      | Pair      | Africa      | --         | -- | -- | -- | -- |
| <i>C. monachus</i>       | Unknown   | Pair      | Africa      | --         | -- | -- | -- | -- |
| <i>C. cupreicaudus</i>   | Pair      | Pair      | Africa      | --         | -- | -- | -- | -- |
| <i>C. superciliosus</i>  | Pair      | Pair      | Africa      | --         | -- | -- | -- | -- |
| <i>C. burchelli</i>      | Subspp    | Subspp    | Africa      | --         | -- | -- | -- | -- |
| <i>C. nigrorufus</i>     | Unknown   | Pair      | Indomalayan | --         | -- | -- | -- | -- |
| <i>C. sinensis</i>       | Pair      | Pair      | Indomalayan | --         | -- | -- | -- | -- |
| <i>C. andamanensis</i>   | Subspp    | Subspp    | Australia   | --         | -- | -- | -- | -- |
| <i>C. goliath</i>        | Unknown   | Pair      | Australia   | --         | -- | -- | -- | -- |
| <i>C. toulou</i>         | Unknown   | Pair      | Africa      | --         | -- | -- | -- | -- |
| <i>C. grillii</i>        | Male only | Male only | Africa      | [129, 131] | -- | -- | -- | -- |
| <i>C. viridis</i>        | Unknown   | Pair      | Indomalayan | [129]      | -- | -- | -- | -- |
| <i>C. bengalensis</i>    | Unknown   | Pair      | Indomalayan | --         | -- | -- | -- | -- |
| <i>C. violaceus</i>      | Unknown   | Pair      | Australia   | --         | -- | -- | -- | -- |
| <i>C. bernsteini</i>     | Unknown   | Pair      | Australia   | --         | -- | -- | -- | -- |
| <i>C. phasianinus</i>    | Pair      | Pair      | Australia   | --         | -- | -- | -- | -- |
| <i>C. spilopterus</i>    | Subspp    | Subspp    | Australia   | --         | -- | -- | -- | -- |

**Cuculiformes: Cuculidae: Couinae**

|                             |         |      |             |       |      |       |     |       |
|-----------------------------|---------|------|-------------|-------|------|-------|-----|-------|
| <i>Carpococcyx radiatus</i> | Unknown | Pair | Indomalayan | [129] | bbba | [130] | bab | [130] |
| <i>C. renauldi</i>          | Pair    | Pair | Indomalayan | --    | --   | --    | --  | --    |
| <i>Coua cristata</i>        | Pair    | Pair | Africa      | --    | --   | --    | --  | --    |
| <i>C. verreauxi</i>         | Unknown | Pair | Africa      | --    | --   | --    | --  | --    |
| <i>C. caerulea</i>          | Unknown | Pair | Africa      | --    | --   | --    | --  | --    |
| <i>C. ruficeps</i>          | Unknown | Pair | Africa      | --    | --   | --    | --  | --    |
| <i>C. reynaudii</i>         | Unknown | Pair | Africa      | --    | --   | --    | --  | --    |
| <i>C. coquereli</i>         | Unknown | Pair | Africa      | --    | --   | --    | --  | --    |
| <i>C. cursor</i>            | Unknown | Pair | Africa      | --    | --   | --    | --  | --    |
| <i>C. gigas</i>             | Pair    | Pair | Africa      | --    | --   | --    | --  | --    |
| <i>C. delalandei</i>        | Unknown | Pair | Africa      | --    | --   | --    | --  | --    |
| <i>C. serriana</i>          | Unknown | Pair | Africa      | --    | --   | --    | --  | --    |

**Cuculiformes: Cuculidae: Cuculinae: Rhinortha**

|                              |         |      |             |       |      |       |     |       |
|------------------------------|---------|------|-------------|-------|------|-------|-----|-------|
| <i>Rhinortha chlorophaea</i> | Unknown | Pair | Indomalayan | [129] | bbba | [130] | bba | [130] |
|------------------------------|---------|------|-------------|-------|------|-------|-----|-------|

**Cuculiformes: Cuculidae: Cuculinae: Phaenicophaeni**

|                                |      |      |        |       |      |       |       |       |
|--------------------------------|------|------|--------|-------|------|-------|-------|-------|
| <i>Ceuthmochares australia</i> | Pair | Pair | Africa | [129] | bbba | [130] | bbbaa | [130] |
| <i>C. aereus</i>               | Pair | Pair | Africa | --    | --   | --    | --    | --    |

|                                               |                |                |             |            |    |    |             |    |
|-----------------------------------------------|----------------|----------------|-------------|------------|----|----|-------------|----|
| <i>Taccocua leschenaultii</i>                 | Pair           | Pair           | Indomalayan | --         | -- | -- | bbbbaa      | -- |
| <i>Zanclotomus javanicus</i>                  | Pair           | Pair           | Indomalayan | --         | -- | -- | bbbbbbaa    | -- |
| <i>Phaenicophaeus curvirostris</i>            | Pair           | Pair           | Indomalayan | --         | -- | -- | bbbbbbab    | -- |
| <i>P. sumatranus</i>                          | Pair           | Pair           | Indomalayan | --         | -- | -- | --          | -- |
| <i>P. pyrrhocephalus</i>                      | Pair           | Pair           | Indomalayan | --         | -- | -- | --          | -- |
| <i>P. viridirostris</i>                       | Unknown        | Pair           | Indomalayan | --         | -- | -- | --          | -- |
| <i>P. diardi</i>                              | Unknown        | Pair           | Indomalayan | --         | -- | -- | --          | -- |
| <i>P. tristis</i>                             | Pair           | Pair           | Indomalayan | --         | -- | -- | --          | -- |
| <i>Rhamphococcyx calyrorhynchus calyrorhy</i> | Unknown        | Pair           | Indomalayan | --         | -- | -- | bbbbbbbaa   | -- |
| <i>Dasylophus superciliosus</i>               | Unknown        | Pair           | Indomalayan | --         | -- | -- | --          | -- |
| <i>D. cumingi</i>                             | Unknown        | Pair           | Indomalayan | --         | -- | -- | --          | -- |
| <i>Clamator coromandus</i>                    | Brood parasite | Brood parasite | Indomalayan | --         | -- | -- | bbbbbbaba   | -- |
| <i>C. glandarius</i>                          | Brood parasite | Brood parasite | Widespread  | --         | -- | -- | --          | -- |
| <i>C. levaillantii</i>                        | Brood parasite | Brood parasite | Africa      | --         | -- | -- | --          | -- |
| <i>C. jacobinus</i>                           | Brood parasite | Brood parasite | Widespread  | --         | -- | -- | --          | -- |
| <i>Coccyua minuta</i>                         | Unknown        | Pair           | Neotropical | --         | -- | -- | bbbbbbabba  | -- |
| <i>C. pumila</i>                              | Occasional     | Pair           | Neotropical | [129, 132] | -- | -- | --          | -- |
| <i>C. cinerea</i>                             | Unknown        | Pair           | Neotropical | [129]      | -- | -- | --          | -- |
| <i>Piaya cayana</i>                           | Pair           | Pair           | Neotropical | --         | -- | -- | bbbbbbabbba | -- |
| <i>P. melanogaster</i>                        | Unknown        | Pair           | Neotropical | --         | -- | -- | --          | -- |
| <i>Coccyzus erythrophthalmus</i>              | Pair           | Pair           | Nearctic    | --         | -- | -- | bbbbbbabbbb | -- |
| <i>C. americanus</i>                          | Occasional     | Pair           | Nearctic    | [129, 133] | -- | -- | --          | -- |
| <i>C. euleri</i>                              | Unknown        | Pair           | Neotropical | [129]      | -- | -- | --          | -- |
| <i>C. minor</i>                               | Pair           | Pair           | Neotropical | --         | -- | -- | --          | -- |
| <i>C. ferrugineus</i>                         | Unknown        | Pair           | Neotropical | --         | -- | -- | --          | -- |
| <i>C. melacoryphus</i>                        | Occasional     | Pair           | Neotropical | --         | -- | -- | --          | -- |
| <i>C. lansbergi</i>                           | Unknown        | Pair           | Neotropical | --         | -- | -- | --          | -- |
| <i>C. pluvialis</i>                           | Unknown        | Pair           | Neotropical | --         | -- | -- | --          | -- |
| <i>C. rufularis</i>                           | Unknown        | Pair           | Neotropical | --         | -- | -- | --          | -- |
| <i>C. vetula</i>                              | Pair           | Pair           | Neotropical | --         | -- | -- | --          | -- |
| <i>C. vieillotii</i>                          | Unknown        | Pair           | Neotropical | --         | -- | -- | --          | -- |
| <i>C. merlini</i>                             | Unknown        | Pair           | Neotropical | --         | -- | -- | --          | -- |
| <i>C. longirostris</i>                        | Unknown        | Pair           | Neotropical | --         | -- | -- | --          | -- |

**Cuculiformes: Cuculidae: Cuculinae: Cuculini**

|                                  |                |                |             |       |      |       |          |       |
|----------------------------------|----------------|----------------|-------------|-------|------|-------|----------|-------|
| <i>Pachycoccyx audeberti</i>     | Brood parasite | Brood parasite | Africa      | [129] | bbba | [130] | bbbbbbba | [130] |
| <i>Microdynamis parva</i>        | Unknown        | Brood parasite | Australia   | --    | --   | --    | --       | --    |
| <i>Eudynamis scolopacea</i>      | Brood parasite | Brood parasite | Indomalayan | --    | --   | --    | --       | --    |
| <i>E. melanorhyncha</i>          | Subspp         | Subspp         | Widespread  | --    | --   | --    | --       | --    |
| <i>E. cyanocephala</i>           | Subspp         | Subspp         | Australia   | --    | --   | --    | --       | --    |
| <i>Urodynamis taitensis</i>      | Brood parasite | Brood parasite | Australia   | --    | --   | --    | bbbbbbba | --    |
| <i>Scythrops novaehollandiae</i> | Brood parasite | Brood parasite | Australia   | --    | --   | --    | --       | --    |
| <i>Chrysococcyx maculatus</i>    | Brood parasite | Brood parasite | Indomalayan | --    | --   | --    | bbbbbbba | --    |
| <i>C. xanthorhynchus</i>         | Brood parasite | Brood parasite | Indomalayan | --    | --   | --    | --       | --    |

|                               |                |                |             |    |    |    |               |    |
|-------------------------------|----------------|----------------|-------------|----|----|----|---------------|----|
| <i>C. caprius</i>             | Brood parasite | Brood parasite | Africa      | -- | -- | -- | --            | -- |
| <i>C. klaas</i>               | Brood parasite | Brood parasite | Africa      | -- | -- | -- | --            | -- |
| <i>C. flavigularis</i>        | Brood parasite | Brood parasite | Africa      | -- | -- | -- | --            | -- |
| <i>C. cupreus</i>             | Brood parasite | Brood parasite | Africa      | -- | -- | -- | --            | -- |
| <i>C. megarhynchus</i>        | Unknown        | Brood parasite | Australia   | -- | -- | -- | --            | -- |
| <i>C. basalis</i>             | Brood parasite | Brood parasite | Australia   | -- | -- | -- | --            | -- |
| <i>C. osculans</i>            | Brood parasite | Brood parasite | Australia   | -- | -- | -- | --            | -- |
| <i>C. ruficollis</i>          | Unknown        | Brood parasite | Australia   | -- | -- | -- | --            | -- |
| <i>C. lucidus</i>             | Brood parasite | Brood parasite | Australia   | -- | -- | -- | --            | -- |
| <i>C. meyeri</i>              | Unknown        | Brood parasite | Australia   | -- | -- | -- | --            | -- |
| <i>C. minutillus</i>          | Brood parasite | Brood parasite | Widespread  | -- | -- | -- | --            | -- |
| <i>C. russatus</i>            | Subspp         | Subspp         | Australia   | -- | -- | -- | --            | -- |
| <i>C. rufomerus</i>           | Subspp         | Subspp         | Australia   | -- | -- | -- | --            | -- |
| <i>C. crassirostris</i>       | Subspp         | Subspp         | Australia   | -- | -- | -- | --            | -- |
| <i>Cacomantis pallidus</i>    | Brood parasite | Brood parasite | Australia   | -- | -- | -- | bbbbbbbbbbba  | -- |
| <i>C. leucolophus</i>         | Unknown        | Brood parasite | Australia   | -- | -- | -- | --            | -- |
| <i>C. castaneiventris</i>     | Brood parasite | Brood parasite | Australia   | -- | -- | -- | --            | -- |
| <i>C. flabelliformis</i>      | Brood parasite | Brood parasite | Australia   | -- | -- | -- | --            | -- |
| <i>C. sonneratii</i>          | Brood parasite | Brood parasite | Indomalayan | -- | -- | -- | --            | -- |
| <i>C. merulinus</i>           | Brood parasite | Brood parasite | Indomalayan | -- | -- | -- | --            | -- |
| <i>C. passerinus</i>          | Brood parasite | Brood parasite | Indomalayan | -- | -- | -- | --            | -- |
| <i>C. sepulcralis</i>         | Subspp         | Subspp         | Indomalayan | -- | -- | -- | --            | -- |
| <i>C. variolosus</i>          | Brood parasite | Brood parasite | Widespread  | -- | -- | -- | --            | -- |
| <i>C. heinrichi</i>           | Subspp         | Subspp         | Australia   | -- | -- | -- | --            | -- |
| <i>Cercococcyx mechowi</i>    | Brood parasite | Brood parasite | Africa      | -- | -- | -- | bbbbbbbbbbba  | -- |
| <i>C. olivinus</i>            | Brood parasite | Brood parasite | Africa      | -- | -- | -- | --            | -- |
| <i>C. montanus</i>            | Brood parasite | Brood parasite | Africa      | -- | -- | -- | --            | -- |
| <i>Surniculus dicruroides</i> | Brood parasite | Brood parasite | Indomalayan | -- | -- | -- | --            | -- |
| <i>S. velutinus</i>           | Unknown        | Brood parasite | Indomalayan | -- | -- | -- | --            | -- |
| <i>S. lugubris</i>            | Brood parasite | Brood parasite | Indomalayan | -- | -- | -- | --            | -- |
| <i>S. musschenbroeki</i>      | Unknown        | Brood parasite | Indomalayan | -- | -- | -- | --            | -- |
| <i>Hierococcyx vagans</i>     | Brood parasite | Brood parasite | Indomalayan | -- | -- | -- | bbbbbbbbbbba  | -- |
| <i>H. bocki</i>               | Unknown        | Brood parasite | Indomalayan | -- | -- | -- | --            | -- |
| <i>H. sparverioides</i>       | Brood parasite | Brood parasite | Indomalayan | -- | -- | -- | --            | -- |
| <i>H. varius</i>              | Brood parasite | Brood parasite | Indomalayan | -- | -- | -- | --            | -- |
| <i>H. hyperythrus</i>         | Brood parasite | Brood parasite | Indomalayan | -- | -- | -- | --            | -- |
| <i>H. pectoralis</i>          | Unknown        | Brood parasite | Indomalayan | -- | -- | -- | --            | -- |
| <i>H. fugax</i>               | Brood parasite | Brood parasite | Indomalayan | -- | -- | -- | --            | -- |
| <i>H. niscolor</i>            | Brood parasite | Brood parasite | Indomalayan | -- | -- | -- | --            | -- |
| <i>Cuculus clamosus</i>       | Brood parasite | Brood parasite | Africa      | -- | -- | -- | bbbbbbbbbbbbb | -- |
| <i>C. solitarius</i>          | Brood parasite | Brood parasite | Africa      | -- | -- | -- | --            | -- |
| <i>C. poliocephalus</i>       | Brood parasite | Brood parasite | Palaearctic | -- | -- | -- | --            | -- |
| <i>C. crassirostris</i>       | Unknown        | Brood parasite | Indomalayan | -- | -- | -- | --            | -- |



|                       |                |                |             |    |    |    |    |    |
|-----------------------|----------------|----------------|-------------|----|----|----|----|----|
| <i>C. micropterus</i> | Brood parasite | Brood parasite | Indomalayan | -- | -- | -- | -- | -- |
| <i>C. rochii</i>      | Brood parasite | Brood parasite | Africa      | -- | -- | -- | -- | -- |
| <i>C. gularis</i>     | Brood parasite | Brood parasite | Africa      | -- | -- | -- | -- | -- |
| <i>C. optatus</i>     | Brood parasite | Brood parasite | Paleartic   | -- | -- | -- | -- | -- |
| <i>C. saturatus</i>   | Brood parasite | Brood parasite | Widespread  | -- | -- | -- | -- | -- |
| <i>C. lepidus</i>     | Brood parasite | Brood parasite | Widespread  | -- | -- | -- | -- | -- |
| <i>C. canorus</i>     | Brood parasite | Brood parasite | Paleartic   | -- | -- | -- | -- | -- |

**Opisthocomidae: Opisthocomidae**

|                            |             |             |             |       |      |            |
|----------------------------|-------------|-------------|-------------|-------|------|------------|
| <i>Opisthocomus hoazin</i> | Cooperation | Cooperation | Neotropical | [134] | bbbb | [135, 136] |
|----------------------------|-------------|-------------|-------------|-------|------|------------|

**Psittaciformes: Psittacidae**

|                                |         |      |             |                 |      |     |
|--------------------------------|---------|------|-------------|-----------------|------|-----|
| <i>Chalcopsitta atra</i>       | Pair    | Pair | Australia   | [137, 138]      | bbbc | [3] |
| <i>C. duivenbodei</i>          | Unknown | Pair | Australia   | --              | --   | --  |
| <i>C. sintillata</i>           | Unknown | Pair | Australia   | --              | --   | --  |
| <i>C. cardinalis</i>           | Unknown | Pair | Australia   | [125, 137, 138] | --   | --  |
| <i>Eos histrio</i>             | Unknown | Pair | Indomalayan | [137, 138]      | --   | --  |
| <i>E. squamata</i>             | Unknown | Pair | Australia   | --              | --   | --  |
| <i>E. bornea</i>               | Unknown | Pair | Australia   | --              | --   | --  |
| <i>E. reticulata</i>           | Unknown | Pair | Australia   | --              | --   | --  |
| <i>E. cyanogenia</i>           | Unknown | Pair | Australia   | --              | --   | --  |
| <i>E. semilarvata</i>          | Unknown | Pair | Australia   | --              | --   | --  |
| <i>Pseudeos fuscata</i>        | Pair    | Pair | Australia   | --              | --   | --  |
| <i>Trichoglossus ornatus</i>   | Unknown | Pair | Indomalayan | --              | --   | --  |
| <i>T. haematodus</i>           | Pair    | Pair | Australia   | [139]           | --   | --  |
| <i>T. rubritorquis</i>         | Pair    | Pair | Australia   | [137, 138]      | --   | --  |
| <i>T. euteles</i>              | Unknown | Pair | Australia   | --              | --   | --  |
| <i>T. flavoviridis</i>         | Unknown | Pair | Indomalayan | --              | --   | --  |
| <i>T. johnstoniae</i>          | Unknown | Pair | Indomalayan | --              | --   | --  |
| <i>T. rubiginosus</i>          | Unknown | Pair | Australia   | --              | --   | --  |
| <i>T. chlorolepidotus</i>      | Pair    | Pair | Australia   | [139]           | --   | --  |
| <i>Psitteuteles versicolor</i> | Pair    | Pair | Australia   | --              | --   | --  |
| <i>P. iris</i>                 | Unknown | Pair | Australia   | [137, 138]      | --   | --  |
| <i>P. goldiei</i>              | Unknown | Pair | Australia   | --              | --   | --  |
| <i>Lorius garrulus</i>         | Pair    | Pair | Australia   | --              | --   | --  |
| <i>L. domicella</i>            | Unknown | Pair | Australia   | --              | --   | --  |
| <i>L. lory</i>                 | Unknown | Pair | Australia   | --              | --   | --  |
| <i>L. hypoinochrous</i>        | Unknown | Pair | Australia   | --              | --   | --  |
| <i>L. albidinuchus</i>         | Unknown | Pair | Australia   | --              | --   | --  |
| <i>L. chlorocercus</i>         | Unknown | Pair | Australia   | --              | --   | --  |
| <i>Phigys solitarius</i>       | Pair    | Pair | Australia   | --              | --   | --  |
| <i>Vini australis</i>          | Pair    | Pair | Australia   | --              | --   | --  |
| <i>V. kuhlii</i>               | Unknown | Pair | Australia   | --              | --   | --  |
| <i>V. stepheni</i>             | Unknown | Pair | Australia   | --              | --   | --  |
| <i>V. peruviana</i>            | Pair    | Pair | Australia   | --              | --   | --  |

|                                     |         |      |             |            |    |    |
|-------------------------------------|---------|------|-------------|------------|----|----|
| <i>V. ultramarina</i>               | Unknown | Pair | Australia   | --         | -- | -- |
| <i>Glossopsitta concinna</i>        | Pair    | Pair | Australia   | [139]      | -- | -- |
| <i>G. pusilla</i>                   | Pair    | Pair | Australia   | --         | -- | -- |
| <i>G. porphyrocephala</i>           | Pair    | Pair | Australia   | --         | -- | -- |
| <i>Charmosyna palmarum</i>          | Pair    | Pair | Australia   | [137, 138] | -- | -- |
| <i>C. rubrigularis</i>              | Unknown | Pair | Australia   | --         | -- | -- |
| <i>C. meeki</i>                     | Unknown | Pair | Australia   | --         | -- | -- |
| <i>C. toxopei</i>                   | Unknown | Pair | Australia   | --         | -- | -- |
| <i>C. multistriata</i>              | Unknown | Pair | Australia   | --         | -- | -- |
| <i>C. wilhelminae</i>               | Unknown | Pair | Australia   | --         | -- | -- |
| <i>C. rubronotata</i>               | Unknown | Pair | Australia   | --         | -- | -- |
| <i>C. placentis</i>                 | Pair    | Pair | Australia   | --         | -- | -- |
| <i>C. diadema</i>                   | Unknown | Pair | Australia   | --         | -- | -- |
| <i>C. amabilis</i>                  | Unknown | Pair | Australia   | --         | -- | -- |
| <i>C. margarethae</i>               | Unknown | Pair | Australia   | --         | -- | -- |
| <i>C. pulchella</i>                 | Pair    | Pair | Australia   | --         | -- | -- |
| <i>C. josefinae</i>                 | Unknown | Pair | Australia   | --         | -- | -- |
| <i>C. papou</i>                     | Unknown | Pair | Australia   | --         | -- | -- |
| <i>Oreopsittacus arfaki</i>         | Unknown | Pair | Australia   | --         | -- | -- |
| <i>Neopsittacus musschenbroekii</i> | Unknown | Pair | Australia   | --         | -- | -- |
| <i>N. pullicauda</i>                | Unknown | Pair | Australia   | --         | -- | -- |
| <i>Probosciger aterrimus</i>        | Pair    | Pair | Australia   | [140]      | -- | -- |
| <i>Calyptorhynchus baudinii</i>     | Pair    | Pair | Australia   | --         | -- | -- |
| <i>C. latirostris</i>               | Pair    | Pair | Australia   | --         | -- | -- |
| <i>C. funereus</i>                  | Group   | Pair | Australia   | [139, 140] | -- | -- |
| <i>C. banksii</i>                   | Pair    | Pair | Australia   | [140]      | -- | -- |
| <i>C. lathamii</i>                  | Pair    | Pair | Australia   | --         | -- | -- |
| <i>Callocephalon fimbriatum</i>     | Pair    | Pair | Australia   | --         | -- | -- |
| <i>Eolophus roseicapillus</i>       | Pair    | Pair | Australia   | --         | -- | -- |
| <i>Cacatua leadbeateri</i>          | Pair    | Pair | Australia   | --         | -- | -- |
| <i>C. sulphurea</i>                 | Pair    | Pair | Indomalayan | --         | -- | -- |
| <i>C. galerita</i>                  | Pair    | Pair | Australia   | --         | -- | -- |
| <i>C. ophthalmica</i>               | Unknown | Pair | Australia   | --         | -- | -- |
| <i>C. moluccensis</i>               | Unknown | Pair | Australia   | --         | -- | -- |
| <i>C. alba</i>                      | Pair    | Pair | Australia   | --         | -- | -- |
| <i>C. haematuropygia</i>            | Pair    | Pair | Indomalayan | --         | -- | -- |
| <i>C. goffini</i>                   | Unknown | Pair | Australia   | --         | -- | -- |
| <i>C. sanguinea</i>                 | Pair    | Pair | Australia   | --         | -- | -- |
| <i>C. pastinator</i>                | Pair    | Pair | Australia   | --         | -- | -- |
| <i>C. tenuirostris</i>              | Pair    | Pair | Australia   | --         | -- | -- |
| <i>C. ducorpsii</i>                 | Unknown | Pair | Australia   | --         | -- | -- |
| <i>Nymphicus hollandicus</i>        | Group   | Pair | Australia   | [139, 140] | -- | -- |
| <i>Nestor notabilis</i>             | Group   | Pair | Australia   | [137-139]  | -- | -- |

|                                      |             |             |             |                 |    |    |
|--------------------------------------|-------------|-------------|-------------|-----------------|----|----|
| <i>N. meridionalis</i>               | Group       | Pair        | Australia   | [137-139, 141]  | -- | -- |
| <i>Micropsitta keiensis</i>          | Suspected   | Cooperation | Australia   | [137, 138, 142] | -- | -- |
| <i>M. geelvinkiana</i>               | Unknown     | Cooperation | Australia   | [137, 138]      | -- | -- |
| <i>M. pusio</i>                      | Unknown     | Cooperation | Australia   | --              | -- | -- |
| <i>M. meeki</i>                      | Unknown     | Cooperation | Australia   | --              | -- | -- |
| <i>M. finschii</i>                   | Unknown     | Cooperation | Australia   | --              | -- | -- |
| <i>M. bruijnii</i>                   | Suspected   | Cooperation | Australia   | --              | -- | -- |
| <i>Cyclopsitta gulelmitertii</i>     | Unknown     | Pair        | Australia   | --              | -- | -- |
| <i>C. diophthalma</i>                | Pair        | Pair        | Australia   | [139]           | -- | -- |
| <i>Psittaculirostris desmarestii</i> | Pair        | Pair        | Australia   | [137, 138]      | -- | -- |
| <i>P. edwardsii</i>                  | Unknown     | Pair        | Australia   | --              | -- | -- |
| <i>P. salvadorii</i>                 | Unknown     | Pair        | Australia   | --              | -- | -- |
| <i>Bolbopsittacus lunulatus</i>      | Unknown     | Pair        | Indomalayan | --              | -- | -- |
| <i>Psittinus cyanurus</i>            | Pair        | Pair        | Indomalayan | --              | -- | -- |
| <i>Psittacella brehmii</i>           | Unknown     | Pair        | Australia   | --              | -- | -- |
| <i>P. picta</i>                      | Unknown     | Pair        | Australia   | --              | -- | -- |
| <i>P. modesta</i>                    | Unknown     | Pair        | Australia   | --              | -- | -- |
| <i>P. madaraszi</i>                  | Unknown     | Pair        | Australia   | --              | -- | -- |
| <i>Geoffroyus geoffroyi</i>          | Group       | Pair        | Australia   | [137-139, 143]  | -- | -- |
| <i>G. simplex</i>                    | Unknown     | Pair        | Australia   | [137, 138]      | -- | -- |
| <i>G. heteroclitus</i>               | Pair        | Pair        | Australia   | [125, 137, 138] | -- | -- |
| <i>Prioniturus montanus</i>          | Unknown     | Pair        | Indomalayan | [137, 138]      | -- | -- |
| <i>P. waterstradti</i>               | Unknown     | Pair        | Indomalayan | --              | -- | -- |
| <i>P. platenae</i>                   | Unknown     | Pair        | Indomalayan | --              | -- | -- |
| <i>P. luconensis</i>                 | Unknown     | Pair        | Indomalayan | --              | -- | -- |
| <i>P. discurus</i>                   | Unknown     | Pair        | Indomalayan | --              | -- | -- |
| <i>P. verticalis</i>                 | Unknown     | Pair        | Indomalayan | --              | -- | -- |
| <i>P. flavicans</i>                  | Unknown     | Pair        | Indomalayan | --              | -- | -- |
| <i>P. platurus</i>                   | Unknown     | Pair        | Indomalayan | --              | -- | -- |
| <i>P. mada</i>                       | Unknown     | Pair        | Indomalayan | --              | -- | -- |
| <i>Tanygnathus megalorynchos</i>     | Unknown     | Pair        | Indomalayan | --              | -- | -- |
| <i>T. lucionensis</i>                | Unknown     | Pair        | Indomalayan | --              | -- | -- |
| <i>T. sumatranus</i>                 | Unknown     | Pair        | Indomalayan | --              | -- | -- |
| <i>T. gramineus</i>                  | Unknown     | Pair        | Indomalayan | --              | -- | -- |
| <i>Eclectus roratus</i>              | Cooperation | Cooperation | Australia   | [144]           | -- | -- |
| <i>Psittrichas fulgidus</i>          | Unknown     | Pair        | Australia   | [137, 138]      | -- | -- |
| <i>Prosopiea splendens</i>           | Unknown     | Pair        | Australia   | --              | -- | -- |
| <i>P. personata</i>                  | Unknown     | Pair        | Australia   | --              | -- | -- |
| <i>P. tabuensis</i>                  | Pair        | Pair        | Australia   | --              | -- | -- |
| <i>Alisterus scapularis</i>          | Pair        | Pair        | Australia   | [139]           | -- | -- |
| <i>A. amboinensis</i>                | Unknown     | Pair        | Australia   | [137, 138]      | -- | -- |
| <i>A. chloropterus</i>               | Unknown     | Pair        | Australia   | --              | -- | -- |
| <i>Aprosmictus jonquillaceus</i>     | Unknown     | Pair        | Australia   | --              | -- | -- |

|                                  |             |             |           |                 |    |    |
|----------------------------------|-------------|-------------|-----------|-----------------|----|----|
| <i>A. erythropterus</i>          | Pair        | Pair        | Australia | [139]           | -- | -- |
| <i>Polytelis swainsonii</i>      | Pair        | Pair        | Australia | --              | -- | -- |
| <i>P. anthoepplus</i>            | Suspected   | Cooperation | Australia | --              | -- | -- |
| <i>P. alexandrae</i>             | Pair        | Pair        | Australia | --              | -- | -- |
| <i>Purpureicephalus spurius</i>  | Pair        | Pair        | Australia | --              | -- | -- |
| <i>Barnardius zonarius</i>       | Pair        | Pair        | Australia | --              | -- | -- |
| <i>B. barnardi</i>               | Pair        | Pair        | Australia | --              | -- | -- |
| <i>Platycercus caledonicus</i>   | Pair        | Pair        | Australia | --              | -- | -- |
| <i>P. elegans</i>                | Occasional  | Pair        | Australia | --              | -- | -- |
| <i>P. flaveolus</i>              | Pair        | Pair        | Australia | --              | -- | -- |
| <i>P. venustus</i>               | Pair        | Pair        | Australia | --              | -- | -- |
| <i>P. adscitus</i>               | Pair        | Pair        | Australia | --              | -- | -- |
| <i>P. eximius</i>                | Pair        | Pair        | Australia | --              | -- | -- |
| <i>P. icterotis</i>              | Pair        | Pair        | Australia | --              | -- | -- |
| <i>Northiella haematogaster</i>  | Pair        | Pair        | Australia | --              | -- | -- |
| <i>Psephotus haematonotus</i>    | Pair        | Pair        | Australia | --              | -- | -- |
| <i>P. varius</i>                 | Pair        | Pair        | Australia | --              | -- | -- |
| <i>P. dissimilis</i>             | Pair        | Pair        | Australia | --              | -- | -- |
| <i>P. chrysopterygius</i>        | Pair        | Pair        | Australia | --              | -- | -- |
| <i>P. pulcherrimus</i>           | Pair        | Pair        | Australia | --              | -- | -- |
| <i>Cyanoramphus unicolor</i>     | Pair        | Pair        | Australia | --              | -- | -- |
| <i>C. cookii</i>                 | Pair        | Pair        | Australia | [137, 138]      | -- | -- |
| <i>C. novaezelandiae</i>         | Occasional  | Pair        | Australia | [139]           | -- | -- |
| <i>C. auriceps</i>               | Pair        | Pair        | Australia | --              | -- | -- |
| <i>Eunymphicus cornutus</i>      | Pair        | Pair        | Australia | [137, 138]      | -- | -- |
| <i>Neopsephotus bourkii</i>      | Pair        | Pair        | Australia | [139]           | -- | -- |
| <i>Neophema chrysostoma</i>      | Pair        | Pair        | Australia | --              | -- | -- |
| <i>N. elegans</i>                | Pair        | Pair        | Australia | --              | -- | -- |
| <i>N. petrophila</i>             | Pair        | Pair        | Australia | --              | -- | -- |
| <i>N. chrysogaster</i>           | Pair        | Pair        | Australia | --              | -- | -- |
| <i>N. pulchella</i>              | Pair        | Pair        | Australia | --              | -- | -- |
| <i>N. splendida</i>              | Pair        | Pair        | Australia | --              | -- | -- |
| <i>Lathamus discolor</i>         | Pair        | Pair        | Australia | --              | -- | -- |
| <i>Melopsittacus undulatus</i>   | Pair        | Pair        | Australia | --              | -- | -- |
| <i>Pezoporus wallicus</i>        | Pair        | Pair        | Australia | --              | -- | -- |
| <i>Geopsittacus occidentalis</i> | Unknown     | Pair        | Australia | --              | -- | -- |
| <i>Strigops habroptilus</i>      | Female only | Female only | Australia | --              | -- | -- |
| <i>Coracopsis vasa</i>           | Cooperation | Cooperation | Africa    | [145, 146]      | -- | -- |
| <i>C. nigra</i>                  | Cooperation | Cooperation | Africa    | [137, 138, 146] | -- | -- |
| <i>Psittacus erithacus</i>       | Pair        | Pair        | Africa    | [137, 138, 147] | -- | -- |
| <i>Poicephalus robustus</i>      | Pair        | Pair        | Africa    | --              | -- | -- |
| <i>P. gulielmi</i>               | Pair        | Pair        | Africa    | --              | -- | -- |
| <i>P. senegalus</i>              | Pair        | Pair        | Africa    | --              | -- | -- |

|                                   |           |             |             |                 |    |    |
|-----------------------------------|-----------|-------------|-------------|-----------------|----|----|
| <i>P. crassus</i>                 | Unknown   | Pair        | Africa      | --              | -- | -- |
| <i>P. meyeri</i>                  | Pair      | Pair        | Africa      | --              | -- | -- |
| <i>P. flavifrons</i>              | Unknown   | Pair        | Africa      | --              | -- | -- |
| <i>P. rufiventris</i>             | Pair      | Pair        | Africa      | --              | -- | -- |
| <i>P. cryptoxanthus</i>           | Unknown   | Pair        | Africa      | --              | -- | -- |
| <i>P. rueppellii</i>              | Unknown   | Pair        | Africa      | --              | -- | -- |
| <i>Agapornis canus</i>            | Pair      | Pair        | Africa      | --              | -- | -- |
| <i>A. pullarius</i>               | Pair      | Pair        | Africa      | --              | -- | -- |
| <i>A. taranta</i>                 | Pair      | Pair        | Africa      | --              | -- | -- |
| <i>A. swindernianus</i>           | Unknown   | Pair        | Africa      | --              | -- | -- |
| <i>A. roseicollis</i>             | Pair      | Pair        | Africa      | --              | -- | -- |
| <i>A. fischeri</i>                | Pair      | Pair        | Africa      | --              | -- | -- |
| <i>A. personatus</i>              | Pair      | Pair        | Africa      | --              | -- | -- |
| <i>A. lilianae</i>                | Pair      | Pair        | Africa      | --              | -- | -- |
| <i>A. nigrigenis</i>              | Unknown   | Pair        | Africa      | --              | -- | -- |
| <i>Loriculus vernalis</i>         | Pair      | Pair        | Indomalayan | [137, 138]      | -- | -- |
| <i>L. beryllinus</i>              | Pair      | Pair        | Indomalayan | --              | -- | -- |
| <i>L. philippensis</i>            | Pair      | Pair        | Indomalayan | --              | -- | -- |
| <i>L. galgulus</i>                | Captivity | Cooperation | Indomalayan | --              | -- | -- |
| <i>L. stigmatus</i>               | Unknown   | Pair        | Indomalayan | --              | -- | -- |
| <i>L. amabilis</i>                | Unknown   | Pair        | Indomalayan | --              | -- | -- |
| <i>L. catamene</i>                | Unknown   | Pair        | Indomalayan | --              | -- | -- |
| <i>L. aurantiifrons</i>           | Unknown   | Pair        | Australia   | --              | -- | -- |
| <i>L. tener</i>                   | Unknown   | Pair        | Australia   | --              | -- | -- |
| <i>L. exilis</i>                  | Unknown   | Pair        | Indomalayan | --              | -- | -- |
| <i>L. pusillus</i>                | Pair      | Pair        | Indomalayan | --              | -- | -- |
| <i>L. flosculus</i>               | Unknown   | Pair        | Indomalayan | --              | -- | -- |
| <i>Psittacula eupatria</i>        | Unknown   | Pair        | Indomalayan | --              | -- | -- |
| <i>P. krameri</i>                 | Pair      | Pair        | Widespread  | --              | -- | -- |
| <i>P. echo</i>                    | Pair      | Pair        | Africa      | --              | -- | -- |
| <i>P. himalayana</i>              | Unknown   | Pair        | Indomalayan | --              | -- | -- |
| <i>P. finschii</i>                | Unknown   | Pair        | Indomalayan | --              | -- | -- |
| <i>P. cyanocephala</i>            | Pair      | Pair        | Indomalayan | --              | -- | -- |
| <i>P. roseata</i>                 | Unknown   | Pair        | Indomalayan | --              | -- | -- |
| <i>P. columboides</i>             | Pair      | Pair        | Indomalayan | --              | -- | -- |
| <i>P. calthropae</i>              | Unknown   | Pair        | Indomalayan | --              | -- | -- |
| <i>P. derbiana</i>                | Unknown   | Pair        | Indomalayan | --              | -- | -- |
| <i>P. alexandri</i>               | Pair      | Pair        | Indomalayan | --              | -- | -- |
| <i>P. caniceps</i>                | Unknown   | Pair        | Indomalayan | --              | -- | -- |
| <i>P. longicauda</i>              | Pair      | Pair        | Indomalayan | --              | -- | -- |
| <i>Anodorhynchus hyacinthinus</i> | Pair      | Pair        | Neotropical | --              | -- | -- |
| <i>A. leari</i>                   | Unknown   | Pair        | Neotropical | --              | -- | -- |
| <i>Ara ararauna</i>               | Pair      | Pair        | Neotropical | [137, 138, 148] | -- | -- |

|                                   |             |             |             |                 |    |    |
|-----------------------------------|-------------|-------------|-------------|-----------------|----|----|
| <i>A. glaucogularis</i>           | Unknown     | Pair        | Neotropical | [137, 138]      | -- | -- |
| <i>A. militaris</i>               | Pair        | Pair        | Neotropical | [137, 138, 148] | -- | -- |
| <i>A. ambigua</i>                 | Pair        | Pair        | Neotropical | [137, 138]      | -- | -- |
| <i>A. macao</i>                   | Pair        | Pair        | Neotropical | [137, 138, 148] | -- | -- |
| <i>A. chloropterus</i>            | Pair        | Pair        | Neotropical | [79, 137, 138]  | -- | -- |
| <i>A. rubrogenys</i>              | Pair        | Pair        | Neotropical | [137, 138]      | -- | -- |
| <i>A. severa</i>                  | Pair        | Pair        | Neotropical | [137, 138, 148] | -- | -- |
| <i>A. manilata</i>                | Pair        | Pair        | Neotropical | [137, 138]      | -- | -- |
| <i>A. couloni</i>                 | Unknown     | Pair        | Neotropical | --              | -- | -- |
| <i>A. maracana</i>                | Unknown     | Pair        | Neotropical | --              | -- | -- |
| <i>A. auricollis</i>              | Unknown     | Pair        | Neotropical | --              | -- | -- |
| <i>A. nobilis</i>                 | Unknown     | Pair        | Neotropical | --              | -- | -- |
| <i>Aratinga acuticaudata</i>      | Unknown     | Pair        | Neotropical | --              | -- | -- |
| <i>A. guarouba</i>                | Cooperation | Cooperation | Neotropical | [137, 138, 149] | -- | -- |
| <i>A. holochlora</i>              | Unknown     | Pair        | Neotropical | [137, 138]      | -- | -- |
| <i>A. strenua</i>                 | Subspp      | Subspp      | Neotropical | --              | -- | -- |
| <i>A. wagleri</i>                 | Unknown     | Pair        | Neotropical | --              | -- | -- |
| <i>A. mitrata</i>                 | Unknown     | Pair        | Neotropical | --              | -- | -- |
| <i>A. erythrogenys</i>            | Unknown     | Pair        | Neotropical | --              | -- | -- |
| <i>A. finschi</i>                 | Unknown     | Pair        | Neotropical | --              | -- | -- |
| <i>A. leucophthalmus</i>          | Unknown     | Pair        | Neotropical | --              | -- | -- |
| <i>A. euops</i>                   | Unknown     | Pair        | Neotropical | --              | -- | -- |
| <i>A. chloroptera</i>             | Unknown     | Pair        | Neotropical | --              | -- | -- |
| <i>A. solstitialis</i>            | Unknown     | Pair        | Neotropical | --              | -- | -- |
| <i>A. jandaya</i>                 | Unknown     | Pair        | Neotropical | --              | -- | -- |
| <i>A. auricapilla</i>             | Unknown     | Pair        | Neotropical | --              | -- | -- |
| <i>A. weddellii</i>               | Suspected   | Cooperation | Neotropical | [150]           | -- | -- |
| <i>A. nana</i>                    | Unknown     | Pair        | Neotropical | [137, 138]      | -- | -- |
| <i>A. canicularis</i>             | Pair        | Pair        | Neotropical | --              | -- | -- |
| <i>A. aurea</i>                   | Pair        | Pair        | Neotropical | --              | -- | -- |
| <i>A. pertinax</i>                | Unknown     | Pair        | Neotropical | --              | -- | -- |
| <i>A. cactorum</i>                | Unknown     | Pair        | Neotropical | --              | -- | -- |
| <i>Nandayus nenday</i>            | Unknown     | Pair        | Neotropical | --              | -- | -- |
| <i>Leptosittaca branickii</i>     | Unknown     | Pair        | Neotropical | --              | -- | -- |
| <i>Ognorhynchus icterotis</i>     | Pair        | Pair        | Neotropical | --              | -- | -- |
| <i>Rhynchopsitta pachyrhyncha</i> | Unknown     | Pair        | Neotropical | --              | -- | -- |
| <i>R. terrisi</i>                 | Unknown     | Pair        | Neotropical | [137, 138, 148] | -- | -- |
| <i>Cyanoliseus patagonus</i>      | Pair        | Pair        | Neotropical | --              | -- | -- |
| <i>Pyrhura cruentata</i>          | Unknown     | Pair        | Neotropical | [137, 138]      | -- | -- |
| <i>P. devillei</i>                | Unknown     | Pair        | Neotropical | --              | -- | -- |
| <i>P. frontalis</i>               | Unknown     | Pair        | Neotropical | --              | -- | -- |
| <i>P. perlata</i>                 | Unknown     | Pair        | Neotropical | --              | -- | -- |
| <i>P. rhodogaster</i>             | Unknown     | Pair        | Neotropical | --              | -- | -- |

|                                 |             |             |             |                     |    |    |
|---------------------------------|-------------|-------------|-------------|---------------------|----|----|
| <i>P. molinae</i>               | Unknown     | Pair        | Neotropical | --                  | -- | -- |
| <i>P. picta</i>                 | Cooperation | Cooperation | Neotropical | [151]               | -- | -- |
| <i>P. leucotis</i>              | Unknown     | Pair        | Neotropical | [137, 138]          | -- | -- |
| <i>P. viridicata</i>            | Unknown     | Pair        | Neotropical | --                  | -- | -- |
| <i>P. egregia</i>               | Unknown     | Pair        | Neotropical | --                  | -- | -- |
| <i>P. melanura</i>              | Unknown     | Pair        | Neotropical | --                  | -- | -- |
| <i>P. orcesi</i>                | Unknown     | Pair        | Neotropical | --                  | -- | -- |
| <i>P. rupicola</i>              | Unknown     | Pair        | Neotropical | --                  | -- | -- |
| <i>P. albipectus</i>            | Unknown     | Pair        | Neotropical | --                  | -- | -- |
| <i>P. calliptera</i>            | Unknown     | Pair        | Neotropical | --                  | -- | -- |
| <i>P. hoematotis</i>            | Unknown     | Pair        | Neotropical | --                  | -- | -- |
| <i>P. rhodocephala</i>          | Unknown     | Pair        | Neotropical | --                  | -- | -- |
| <i>P. hoffmanni</i>             | Unknown     | Pair        | Neotropical | --                  | -- | -- |
| <i>Enicognathus ferrugineus</i> | Unknown     | Pair        | Neotropical | --                  | -- | -- |
| <i>E. leptorhynchus</i>         | Pair        | Pair        | Neotropical | [137, 138, 148]     | -- | -- |
| <i>Myiopsitta monachus</i>      | Cooperation | Cooperation | Neotropical | [152-154]           | -- | -- |
| <i>Bolborhynchus aymara</i>     | Pair        | Pair        | Neotropical | [137, 138]          | -- | -- |
| <i>B. aurifrons</i>             | Pair        | Pair        | Neotropical | --                  | -- | -- |
| <i>B. lineola</i>               | Unknown     | Pair        | Neotropical | --                  | -- | -- |
| <i>B. orbygnesi</i>             | Unknown     | Pair        | Neotropical | --                  | -- | -- |
| <i>B. ferrugineifrons</i>       | Unknown     | Pair        | Neotropical | --                  | -- | -- |
| <i>Forpus cyanopygius</i>       | Unknown     | Pair        | Neotropical | --                  | -- | -- |
| <i>F. passerinus</i>            | Pair        | Pair        | Neotropical | --                  | -- | -- |
| <i>F. crassirostris</i>         | Pair        | Pair        | Neotropical | --                  | -- | -- |
| <i>F. conspicillatus</i>        | Unknown     | Pair        | Neotropical | --                  | -- | -- |
| <i>F. sclateri</i>              | Pair        | Pair        | Neotropical | [79, 137, 138]      | -- | -- |
| <i>F. coelestis</i>             | Pair        | Pair        | Neotropical | [137, 138]          | -- | -- |
| <i>F. xanthops</i>              | Pair        | Pair        | Neotropical | --                  | -- | -- |
| <i>Brotogeris tirica</i>        | Pair        | Pair        | Neotropical | --                  | -- | -- |
| <i>B. versicolurus</i>          | Unknown     | Pair        | Neotropical | --                  | -- | -- |
| <i>B. chiriri</i>               | Pair        | Pair        | Neotropical | --                  | -- | -- |
| <i>B. pyrrhopterus</i>          | Pair        | Pair        | Neotropical | --                  | -- | -- |
| <i>B. jugularis</i>             | Pair        | Pair        | Neotropical | --                  | -- | -- |
| <i>B. cyanopectus</i>           | Cooperation | Cooperation | Neotropical | [79, 137, 138, 155] | -- | -- |
| <i>B. chrysopterus</i>          | Suspected   | Cooperation | Neotropical | [137, 138]          | -- | -- |
| <i>B. sanctithomae</i>          | Unknown     | Cooperation | Neotropical | --                  | -- | -- |
| <i>Nannopsittaca panychlora</i> | Unknown     | Pair        | Neotropical | --                  | -- | -- |
| <i>N. dachilleae</i>            | Unknown     | Pair        | Neotropical | --                  | -- | -- |
| <i>Touit batavica</i>           | Pair        | Pair        | Neotropical | [79, 137, 138]      | -- | -- |
| <i>T. huetii</i>                | Unknown     | Pair        | Neotropical | [137, 138]          | -- | -- |
| <i>T. costaricensis</i>         | Unknown     | Pair        | Neotropical | --                  | -- | -- |
| <i>T. dilectissima</i>          | Unknown     | Pair        | Neotropical | --                  | -- | -- |
| <i>T. purpurata</i>             | Unknown     | Pair        | Neotropical | --                  | -- | -- |

|                                  |           |             |             |                |    |    |
|----------------------------------|-----------|-------------|-------------|----------------|----|----|
| <i>T. melanonotus</i>            | Unknown   | Pair        | Neotropical | --             | -- | -- |
| <i>T. surda</i>                  | Unknown   | Pair        | Neotropical | --             | -- | -- |
| <i>T. stictoptera</i>            | Unknown   | Pair        | Neotropical | --             | -- | -- |
| <i>Pionites melanocephala</i>    | Unknown   | Pair        | Neotropical | --             | -- | -- |
| <i>P. leucogaster</i>            | Suspected | Cooperation | Neotropical | [150]          | -- | -- |
| <i>Pionopsitta pileata</i>       | Unknown   | Pair        | Neotropical | [137, 138]     | -- | -- |
| <i>P. haematotis</i>             | Unknown   | Pair        | Neotropical | --             | -- | -- |
| <i>P. pulchra</i>                | Unknown   | Pair        | Neotropical | --             | -- | -- |
| <i>P. barrabandi</i>             | Unknown   | Pair        | Neotropical | --             | -- | -- |
| <i>P. pyrilia</i>                | Unknown   | Pair        | Neotropical | --             | -- | -- |
| <i>P. caica</i>                  | Unknown   | Pair        | Neotropical | --             | -- | -- |
| <i>Gypopsitta vulturina</i>      | Unknown   | Pair        | Neotropical | --             | -- | -- |
| <i>Hapalopsittaca melanotis</i>  | Unknown   | Pair        | Neotropical | --             | -- | -- |
| <i>H. amazonina</i>              | Unknown   | Pair        | Neotropical | --             | -- | -- |
| <i>H. fuertesi</i>               | Unknown   | Pair        | Neotropical | --             | -- | -- |
| <i>H. pyrrhops</i>               | Unknown   | Pair        | Neotropical | --             | -- | -- |
| <i>Graydidascalus brachyurus</i> | Unknown   | Pair        | Neotropical | --             | -- | -- |
| <i>Pionus menstruus</i>          | Pair      | Pair        | Neotropical | --             | -- | -- |
| <i>P. sordidus</i>               | Unknown   | Pair        | Neotropical | --             | -- | -- |
| <i>P. maximiliani</i>            | Unknown   | Pair        | Neotropical | --             | -- | -- |
| <i>P. tumultuosus</i>            | Unknown   | Pair        | Neotropical | --             | -- | -- |
| <i>P. senilis</i>                | Pair      | Pair        | Neotropical | --             | -- | -- |
| <i>P. chalcopterus</i>           | Unknown   | Pair        | Neotropical | --             | -- | -- |
| <i>P. fuscus</i>                 | Pair      | Pair        | Neotropical | [79, 137, 138] | -- | -- |
| <i>Amazona leucocephala</i>      | Pair      | Pair        | Neotropical | [137, 138]     | -- | -- |
| <i>A. collaria</i>               | Pair      | Pair        | Neotropical | --             | -- | -- |
| <i>A. ventralis</i>              | Pair      | Pair        | Neotropical | --             | -- | -- |
| <i>A. albifrons</i>              | Pair      | Pair        | Neotropical | --             | -- | -- |
| <i>A. xantholora</i>             | Unknown   | Pair        | Neotropical | --             | -- | -- |
| <i>A. agilis</i>                 | Pair      | Pair        | Neotropical | --             | -- | -- |
| <i>A. vittata</i>                | Pair      | Pair        | Neotropical | --             | -- | -- |
| <i>A. tucumana</i>               | Unknown   | Pair        | Neotropical | --             | -- | -- |
| <i>A. pretrei</i>                | Pair      | Pair        | Neotropical | --             | -- | -- |
| <i>A. viridigenalis</i>          | Unknown   | Pair        | Neotropical | --             | -- | -- |
| <i>A. finschi</i>                | Unknown   | Pair        | Neotropical | --             | -- | -- |
| <i>A. autumnalis</i>             | Pair      | Pair        | Neotropical | --             | -- | -- |
| <i>A. dufresniana</i>            | Pair      | Pair        | Neotropical | [79, 137, 138] | -- | -- |
| <i>A. rhodocorytha</i>           | Unknown   | Pair        | Neotropical | [137, 138]     | -- | -- |
| <i>A. brasiliensis</i>           | Pair      | Pair        | Neotropical | --             | -- | -- |
| <i>A. festiva</i>                | Unknown   | Pair        | Neotropical | --             | -- | -- |
| <i>A. xanthops</i>               | Unknown   | Pair        | Neotropical | --             | -- | -- |
| <i>A. barbadensis</i>            | Pair      | Pair        | Neotropical | [79, 137, 138] | -- | -- |
| <i>A. aestiva</i>                | Pair      | Pair        | Neotropical | [137, 138]     | -- | -- |



|                                 |             |             |             |                |        |          |
|---------------------------------|-------------|-------------|-------------|----------------|--------|----------|
| <i>A. oratrix</i>               | Unknown     | Pair        | Neotropical | --             | --     | --       |
| <i>A. auropalliata</i>          | Pair        | Pair        | Neotropical | --             | --     | --       |
| <i>A. ochrocephala</i>          | Pair        | Pair        | Neotropical | [79, 137, 138] | --     | --       |
| <i>A. amazonica</i>             | Pair        | Pair        | Neotropical | [137, 138]     | --     | --       |
| <i>A. mercenaria</i>            | Pair        | Pair        | Neotropical | [79, 137, 138] | --     | --       |
| <i>A. kawalli</i>               | Unknown     | Pair        | Neotropical | [137, 138]     | --     | --       |
| <i>A. farinosa</i>              | Pair        | Pair        | Neotropical | [79, 137, 138] | --     | --       |
| <i>A. vinacea</i>               | Pair        | Pair        | Neotropical | [137, 138]     | --     | --       |
| <i>A. versicolor</i>            | Pair        | Pair        | Neotropical | --             | --     | --       |
| <i>A. arausiaca</i>             | Pair        | Pair        | Neotropical | --             | --     | --       |
| <i>A. guildingii</i>            | Pair        | Pair        | Neotropical | --             | --     | --       |
| <i>A. imperialis</i>            | Pair        | Pair        | Neotropical | --             | --     | --       |
| <i>Deroptyus accipitrinus</i>   | Unknown     | Pair        | Neotropical | --             | --     | --       |
| <i>Triclaria malachitacea</i>   | Pair        | Pair        | Neotropical | --             | --     | --       |
| <b>Trochiliformes: Apodidae</b> |             |             |             |                |        |          |
| <i>Cypseloides rutilus</i>      | Pair        | Pair        | Neotropical | [156]          | bbbdaa | [3, 136] |
| <i>C. phelpsi</i>               | Unknown     | Pair        | Neotropical | --             | --     | --       |
| <i>C. niger</i>                 | Pair        | Pair        | Paleartic   | --             | --     | --       |
| <i>C. lemosi</i>                | Unknown     | Pair        | Neotropical | --             | --     | --       |
| <i>C. rothschildi</i>           | Unknown     | Pair        | Neotropical | --             | --     | --       |
| <i>C. fumigatus</i>             | Unknown     | Pair        | Neotropical | --             | --     | --       |
| <i>C. cherriei</i>              | Unknown     | Pair        | Neotropical | --             | --     | --       |
| <i>C. storeri</i>               | Unknown     | Pair        | Neotropical | --             | --     | --       |
| <i>C. cryptus</i>               | Unknown     | Pair        | Neotropical | --             | --     | --       |
| <i>C. senex</i>                 | Unknown     | Pair        | Neotropical | --             | --     | --       |
| <i>Streptoprocne zonaris</i>    | Pair        | Pair        | Neotropical | --             | --     | --       |
| <i>S. biscutata</i>             | Unknown     | Pair        | Neotropical | --             | --     | --       |
| <i>S. semicollaris</i>          | Pair        | Pair        | Neotropical | --             | --     | --       |
| <i>Hydrochous gigas</i>         | Unknown     | Pair        | Indomalayan | --             | --     | --       |
| <i>Collocalia esculenta</i>     | Pair        | Pair        | Widespread  | --             | --     | --       |
| <i>C. linchi</i>                | Unknown     | Pair        | Indomalayan | --             | --     | --       |
| <i>C. troglodytes</i>           | Unknown     | Pair        | Indomalayan | --             | --     | --       |
| <i>C. elaphra</i>               | Pair        | Pair        | Africa      | --             | --     | --       |
| <i>C. francica</i>              | Pair        | Pair        | Africa      | --             | --     | --       |
| <i>C. unicolor</i>              | Pair        | Pair        | Indomalayan | --             | --     | --       |
| <i>C. mearnsi</i>               | Unknown     | Pair        | Indomalayan | --             | --     | --       |
| <i>C. infuscata</i>             | Unknown     | Pair        | Australia   | --             | --     | --       |
| <i>C. hirundinacea</i>          | Pair        | Pair        | Australia   | [157]          | --     | --       |
| <i>C. spodiopygius</i>          | Pair        | Pair        | Australia   | [156]          | --     | --       |
| <i>C. terraereginae</i>         | Cooperation | Cooperation | Australia   | --             | --     | --       |
| <i>C. brevirostris</i>          | Unknown     | Pair        | Indomalayan | --             | --     | --       |
| <i>C. vulcanorum</i>            | Subspp      | Subspp      | Indomalayan | --             | --     | --       |
| <i>C. rogersi</i>               | Subspp      | Subspp      | Indomalayan | --             | --     | --       |

|                                 |             |             |             |                 |    |    |
|---------------------------------|-------------|-------------|-------------|-----------------|----|----|
| <i>C. whiteheadi</i>            | Unknown     | Pair        | Indomalayan | --              | -- | -- |
| <i>C. nuditarsus</i>            | Unknown     | Pair        | Australia   | --              | -- | -- |
| <i>C. orientalis</i>            | Unknown     | Pair        | Australia   | --              | -- | -- |
| <i>C. salangana</i>             | Pair        | Pair        | Indomalayan | --              | -- | -- |
| <i>C. palawanensis</i>          | Subspp      | Subspp      | Indomalayan | --              | -- | -- |
| <i>C. amelis</i>                | Subspp      | Subspp      | Indomalayan | --              | -- | -- |
| <i>C. vanikorensis</i>          | Unknown     | Pair        | Australia   | --              | -- | -- |
| <i>C. pelewensis</i>            | Unknown     | Pair        | Indomalayan | --              | -- | -- |
| <i>C. inquieta</i>              | Unknown     | Pair        | Australia   | --              | -- | -- |
| <i>C. sawtelli</i>              | Pair        | Pair        | Australia   | --              | -- | -- |
| <i>C. leucophaeus</i>           | Pair        | Pair        | Australia   | --              | -- | -- |
| <i>C. ocista</i>                | Subspp      | Subspp      | Australia   | --              | -- | -- |
| <i>C. maxima</i>                | Pair        | Pair        | Indomalayan | --              | -- | -- |
| <i>C. fuciphaga</i>             | Pair        | Pair        | Indomalayan | --              | -- | -- |
| <i>C. germani</i>               | Subspp      | Subspp      | Indomalayan | --              | -- | -- |
| <i>C. papuensis</i>             | Unknown     | Pair        | Australia   | --              | -- | -- |
| <i>Schoutedenapus myoptilus</i> | Unknown     | Pair        | Africa      | --              | -- | -- |
| <i>S. schoutedeni</i>           | Unknown     | Pair        | Africa      | --              | -- | -- |
| <i>Mearnsia picina</i>          | Unknown     | Pair        | Indomalayan | --              | -- | -- |
| <i>M. novaeguineae</i>          | Unknown     | Pair        | Australia   | --              | -- | -- |
| <i>Zoonavena grandidieri</i>    | Unknown     | Pair        | Africa      | --              | -- | -- |
| <i>Z. thomensis</i>             | Unknown     | Pair        | Africa      | --              | -- | -- |
| <i>Z. sylvatica</i>             | Unknown     | Pair        | Indomalayan | --              | -- | -- |
| <i>Telacanthura ussheri</i>     | Unknown     | Pair        | Africa      | --              | -- | -- |
| <i>T. melanopygia</i>           | Unknown     | Pair        | Africa      | --              | -- | -- |
| <i>Rhaphidura leucopygialis</i> | Unknown     | Pair        | Indomalayan | --              | -- | -- |
| <i>R. sabini</i>                | Pair        | Pair        | Africa      | --              | -- | -- |
| <i>Neafrapus cassini</i>        | Unknown     | Pair        | Africa      | [156, 158]      | -- | -- |
| <i>N. boehmi</i>                | Pair        | Pair        | Africa      | --              | -- | -- |
| <i>Hirundapus caudacutus</i>    | Pair        | Pair        | Palaearctic | [156]           | -- | -- |
| <i>H. cochinchinensis</i>       | Unknown     | Pair        | Palaearctic | --              | -- | -- |
| <i>H. giganteus</i>             | Unknown     | Pair        | Indomalayan | --              | -- | -- |
| <i>H. celebensis</i>            | Unknown     | Pair        | Indomalayan | --              | -- | -- |
| <i>Chaetura spinicauda</i>      | Unknown     | Cooperation | Neotropical | --              | -- | -- |
| <i>C. martinica</i>             | Unknown     | Cooperation | Neotropical | --              | -- | -- |
| <i>C. cinereiventris</i>        | Unknown     | Cooperation | Neotropical | --              | -- | -- |
| <i>C. egregia</i>               | Unknown     | Cooperation | Neotropical | --              | -- | -- |
| <i>C. pelagica</i>              | Cooperation | Cooperation | Nearctic    | --              | -- | -- |
| <i>C. vauxi</i>                 | Cooperation | Cooperation | Nearctic    | [156, 159]      | -- | -- |
| <i>C. chapmani</i>              | Unknown     | Cooperation | Neotropical | [156]           | -- | -- |
| <i>C. brachyura</i>             | Cooperation | Cooperation | Neotropical | [156, 160, 161] | -- | -- |
| <i>C. andrei</i>                | Cooperation | Cooperation | Neotropical | [156, 162, 163] | -- | -- |
| <i>Aeronautes saxatalis</i>     | Pair        | Pair        | Nearctic    | [156]           | -- | -- |

|                                      |             |             |             |       |      |          |
|--------------------------------------|-------------|-------------|-------------|-------|------|----------|
| <i>A. montivagus</i>                 | Unknown     | Pair        | Neotropical | --    | --   | --       |
| <i>A. andecolus</i>                  | Unknown     | Pair        | Neotropical | --    | --   | --       |
| <i>Tachornis phoenicobia</i>         | Unknown     | Pair        | Neotropical | --    | --   | --       |
| <i>T. furcata</i>                    | Unknown     | Pair        | Neotropical | --    | --   | --       |
| <i>T. squamata</i>                   | Unknown     | Pair        | Neotropical | --    | --   | --       |
| <i>Panyptila sanctihieronymi</i>     | Unknown     | Pair        | Neotropical | --    | --   | --       |
| <i>P. cayennensis</i>                | Pair        | Pair        | Neotropical | --    | --   | --       |
| <i>Cypsiurus parvus</i>              | Pair        | Pair        | Africa      | --    | --   | --       |
| <i>C. balasiensis</i>                | Pair        | Pair        | Indomalayan | --    | --   | --       |
| <i>Tachymarptis melba</i>            | Pair        | Pair        | Widespread  | --    | --   | --       |
| <i>T. aequatorialis</i>              | Suspected   | Cooperation | Africa      | --    | --   | --       |
| <i>Apus alexandri</i>                | Unknown     | Pair        | Africa      | --    | --   | --       |
| <i>A. apus</i>                       | Pair        | Pair        | Palaearctic | --    | --   | --       |
| <i>A. unicolor</i>                   | Pair        | Pair        | Palaearctic | --    | --   | --       |
| <i>A. niansae</i>                    | Pair        | Pair        | Africa      | --    | --   | --       |
| <i>A. pallidus</i>                   | Pair        | Pair        | Palaearctic | --    | --   | --       |
| <i>A. barbatus</i>                   | Unknown     | Pair        | Africa      | --    | --   | --       |
| <i>A. berliozzi</i>                  | Unknown     | Pair        | Africa      | --    | --   | --       |
| <i>A. bradfieldi</i>                 | Unknown     | Pair        | Africa      | --    | --   | --       |
| <i>A. balstoni</i>                   | Subspp      | Subspp      | Africa      | --    | --   | --       |
| <i>A. pacificus</i>                  | Pair        | Pair        | Palaearctic | --    | --   | --       |
| <i>A. acuticauda</i>                 | Unknown     | Pair        | Indomalayan | --    | --   | --       |
| <i>A. affinis</i>                    | Suspected   | Cooperation | Africa      | --    | --   | --       |
| <i>A. nipalensis</i>                 | Pair        | Pair        | Indomalayan | --    | --   | --       |
| <i>A. horus</i>                      | Pair        | Pair        | Africa      | --    | --   | --       |
| <i>A. toulsoni</i>                   | Subspp      | Subspp      | Africa      | --    | --   | --       |
| <i>A. caffer</i>                     | Pair        | Pair        | Africa      | --    | --   | --       |
| <i>A. batesi</i>                     | Unknown     | Pair        | Africa      | --    | --   | --       |
| <b>Trochiliformes: Hemiprocridae</b> |             |             |             |       |      |          |
| <i>Hemiprocne coronata</i>           | Pair        | Pair        | Indomalayan | [164] | bbdb | [3, 136] |
| <i>H. longipennis</i>                | Pair        | Pair        | Indomalayan | --    | --   | --       |
| <i>H. mystacea</i>                   | Pair        | Pair        | Australia   | --    | --   | --       |
| <i>H. comata</i>                     | Pair        | Pair        | Indomalayan | --    | --   | --       |
| <b>Trochiliformes: Trochilidae</b>   |             |             |             |       |      |          |
| <i>Glaucis aenea</i>                 | Female only | Female only | Neotropical | [165] | bbdb | [3, 136] |
| <i>G. hirsuta</i>                    | Female only | Female only | Neotropical | --    | --   | --       |
| <i>Threnetes niger</i>               | Female only | Female only | Neotropical | --    | --   | --       |
| <i>T. ruckeri</i>                    | Female only | Female only | Neotropical | --    | --   | --       |
| <i>T. leucurus</i>                   | Unknown     | Female only | Neotropical | --    | --   | --       |
| <i>Phaethornis yaruqui</i>           | Female only | Female only | Neotropical | --    | --   | --       |
| <i>P. guy</i>                        | Female only | Female only | Neotropical | --    | --   | --       |
| <i>P. syrmatophorus</i>              | Unknown     | Female only | Neotropical | --    | --   | --       |
| <i>P. superciliosus</i>              | Female only | Female only | Neotropical | --    | --   | --       |

|                                  |             |             |             |    |    |    |
|----------------------------------|-------------|-------------|-------------|----|----|----|
| <i>P. malaris</i>                | Female only | Female only | Neotropical | -- | -- | -- |
| <i>P. eurynome</i>               | Female only | Female only | Neotropical | -- | -- | -- |
| <i>P. hispidus</i>               | Female only | Female only | Neotropical | -- | -- | -- |
| <i>P. anthophilus</i>            | Female only | Female only | Neotropical | -- | -- | -- |
| <i>P. bourcierii</i>             | Female only | Female only | Neotropical | -- | -- | -- |
| <i>P. koepckeae</i>              | Unknown     | Female only | Neotropical | -- | -- | -- |
| <i>P. philippii</i>              | Unknown     | Female only | Neotropical | -- | -- | -- |
| <i>P. squalidus</i>              | Female only | Female only | Neotropical | -- | -- | -- |
| <i>P. augusti</i>                | Unknown     | Female only | Neotropical | -- | -- | -- |
| <i>P. pretrei</i>                | Female only | Female only | Neotropical | -- | -- | -- |
| <i>P. subochraceus</i>           | Unknown     | Female only | Neotropical | -- | -- | -- |
| <i>P. nattereri</i>              | Unknown     | Female only | Neotropical | -- | -- | -- |
| <i>P. gounellei</i>              | Female only | Female only | Neotropical | -- | -- | -- |
| <i>P. ruber</i>                  | Female only | Female only | Neotropical | -- | -- | -- |
| <i>P. stuarti</i>                | Unknown     | Female only | Neotropical | -- | -- | -- |
| <i>P. griseogularis</i>          | Unknown     | Female only | Neotropical | -- | -- | -- |
| <i>P. longuemareus</i>           | Unknown     | Female only | Neotropical | -- | -- | -- |
| <i>P. idaliae</i>                | Female only | Female only | Neotropical | -- | -- | -- |
| <i>Eutoxeres aquila</i>          | Female only | Female only | Neotropical | -- | -- | -- |
| <i>E. condamini</i>              | Female only | Female only | Neotropical | -- | -- | -- |
| <i>Androdon aequatorialis</i>    | Female only | Female only | Neotropical | -- | -- | -- |
| <i>Ramphodon naevius</i>         | Female only | Female only | Neotropical | -- | -- | -- |
| <i>R. dohrnii</i>                | Female only | Female only | Neotropical | -- | -- | -- |
| <i>Doryfera johannae</i>         | Unknown     | Female only | Neotropical | -- | -- | -- |
| <i>D. ludovicae</i>              | Unknown     | Female only | Neotropical | -- | -- | -- |
| <i>Phaeochroa cuvierii</i>       | Female only | Female only | Neotropical | -- | -- | -- |
| <i>Campylopterus curvipennis</i> | Unknown     | Female only | Neotropical | -- | -- | -- |
| <i>C. excellens</i>              | Subspp      | Subspp      | Neotropical | -- | -- | -- |
| <i>C. largipennis</i>            | Unknown     | Female only | Neotropical | -- | -- | -- |
| <i>C. rufus</i>                  | Female only | Female only | Neotropical | -- | -- | -- |
| <i>C. hyperythrus</i>            | Unknown     | Female only | Neotropical | -- | -- | -- |
| <i>C. duidae</i>                 | Unknown     | Female only | Neotropical | -- | -- | -- |
| <i>C. hemileucurus</i>           | Female only | Female only | Neotropical | -- | -- | -- |
| <i>C. ensipennis</i>             | Female only | Female only | Neotropical | -- | -- | -- |
| <i>C. falcatus</i>               | Unknown     | Female only | Neotropical | -- | -- | -- |
| <i>C. phainopeplus</i>           | Unknown     | Female only | Neotropical | -- | -- | -- |
| <i>C. villaviscensio</i>         | Unknown     | Female only | Neotropical | -- | -- | -- |
| <i>Eupetomena macroura</i>       | Female only | Female only | Neotropical | -- | -- | -- |
| <i>Florisuga mellivora</i>       | Unknown     | Female only | Neotropical | -- | -- | -- |
| <i>Melanotrochilus fuscus</i>    | Female only | Female only | Neotropical | -- | -- | -- |
| <i>Colibri delphinae</i>         | Female only | Female only | Neotropical | -- | -- | -- |
| <i>C. thalassinus</i>            | Female only | Female only | Neotropical | -- | -- | -- |
| <i>C. coruscans</i>              | Female only | Female only | Neotropical | -- | -- | -- |

|                                  |             |             |             |    |    |    |
|----------------------------------|-------------|-------------|-------------|----|----|----|
| <i>C. serrirostris</i>           | Female only | Female only | Neotropical | -- | -- | -- |
| <i>Anthracothonax viridigula</i> | Female only | Female only | Neotropical | -- | -- | -- |
| <i>A. prevostii</i>              | Unknown     | Female only | Neotropical | -- | -- | -- |
| <i>A. nigricollis</i>            | Female only | Female only | Neotropical | -- | -- | -- |
| <i>A. mango</i>                  | Female only | Female only | Neotropical | -- | -- | -- |
| <i>A. dominicus</i>              | Unknown     | Female only | Neotropical | -- | -- | -- |
| <i>A. viridis</i>                | Unknown     | Female only | Neotropical | -- | -- | -- |
| <i>Avocettula recurvirostris</i> | Female only | Female only | Neotropical | -- | -- | -- |
| <i>Eulampis jugularis</i>        | Female only | Female only | Neotropical | -- | -- | -- |
| <i>E. holosericeus</i>           | Female only | Female only | Neotropical | -- | -- | -- |
| <i>Chrysolampis mosquitus</i>    | Female only | Female only | Neotropical | -- | -- | -- |
| <i>Orthorhyncus cristatus</i>    | Female only | Female only | Neotropical | -- | -- | -- |
| <i>Klais guimeti</i>             | Female only | Female only | Neotropical | -- | -- | -- |
| <i>Abeillia abeillei</i>         | Unknown     | Female only | Neotropical | -- | -- | -- |
| <i>Stephanoxis lalandi</i>       | Female only | Female only | Neotropical | -- | -- | -- |
| <i>Lophornis ornatus</i>         | Female only | Female only | Neotropical | -- | -- | -- |
| <i>L. gouldii</i>                | Female only | Female only | Neotropical | -- | -- | -- |
| <i>L. magnificus</i>             | Female only | Female only | Neotropical | -- | -- | -- |
| <i>L. brachylopha</i>            | Unknown     | Female only | Neotropical | -- | -- | -- |
| <i>L. delattrei</i>              | Unknown     | Female only | Neotropical | -- | -- | -- |
| <i>L. stictolophus</i>           | Unknown     | Female only | Neotropical | -- | -- | -- |
| <i>L. chalybeus</i>              | Female only | Female only | Neotropical | -- | -- | -- |
| <i>L. pavoninus</i>              | Female only | Female only | Neotropical | -- | -- | -- |
| <i>L. helenae</i>                | Unknown     | Female only | Neotropical | -- | -- | -- |
| <i>L. adorabilis</i>             | Female only | Female only | Neotropical | -- | -- | -- |
| <i>Popelairia popelairii</i>     | Unknown     | Female only | Neotropical | -- | -- | -- |
| <i>P. langsdorffi</i>            | Female only | Female only | Neotropical | -- | -- | -- |
| <i>P. letitia</i>                | Unknown     | Female only | Neotropical | -- | -- | -- |
| <i>P. conversii</i>              | Unknown     | Female only | Neotropical | -- | -- | -- |
| <i>Discosura longicauda</i>      | Female only | Female only | Neotropical | -- | -- | -- |
| <i>Chlorestes notatus</i>        | Female only | Female only | Neotropical | -- | -- | -- |
| <i>Chlorostilbon canivetii</i>   | Subspp      | Subspp      | Neotropical | -- | -- | -- |
| <i>C. assimilis</i>              | Subspp      | Subspp      | Neotropical | -- | -- | -- |
| <i>C. mellisugus</i>             | Female only | Female only | Neotropical | -- | -- | -- |
| <i>C. aureoventris</i>           | Female only | Female only | Neotropical | -- | -- | -- |
| <i>C. ricordii</i>               | Female only | Female only | Neotropical | -- | -- | -- |
| <i>C. bracei</i>                 | Subspp      | Subspp      | Neotropical | -- | -- | -- |
| <i>C. swainsonii</i>             | Female only | Female only | Neotropical | -- | -- | -- |
| <i>C. maugaeus</i>               | Female only | Female only | Neotropical | -- | -- | -- |
| <i>C. gibsoni</i>                | Subspp      | Subspp      | Neotropical | -- | -- | -- |
| <i>C. russatus</i>               | Female only | Female only | Neotropical | -- | -- | -- |
| <i>C. stenura</i>                | Female only | Female only | Neotropical | -- | -- | -- |
| <i>C. alice</i>                  | Female only | Female only | Neotropical | -- | -- | -- |

|                                   |             |             |             |    |    |    |
|-----------------------------------|-------------|-------------|-------------|----|----|----|
| <i>C. poortmani</i>               | Female only | Female only | Neotropical | -- | -- | -- |
| <i>Cynanthus sordidus</i>         | Unknown     | Female only | Neotropical | -- | -- | -- |
| <i>C. latirostris</i>             | Unknown     | Female only | Neotropical | -- | -- | -- |
| <i>Cyanophaia bicolor</i>         | Female only | Female only | Neotropical | -- | -- | -- |
| <i>Thalurania ridgwayi</i>        | Unknown     | Female only | Neotropical | -- | -- | -- |
| <i>T. colombica</i>               | Female only | Female only | Neotropical | -- | -- | -- |
| <i>T. fannyi</i>                  | Female only | Female only | Neotropical | -- | -- | -- |
| <i>T. furcata</i>                 | Unknown     | Female only | Neotropical | -- | -- | -- |
| <i>T. watertonii</i>              | Female only | Female only | Neotropical | -- | -- | -- |
| <i>T. glaucopsis</i>              | Female only | Female only | Neotropical | -- | -- | -- |
| <i>Panterpe insignis</i>          | Female only | Female only | Neotropical | -- | -- | -- |
| <i>Damophila julie</i>            | Female only | Female only | Neotropical | -- | -- | -- |
| <i>Lepidopyga coeruleogularis</i> | Female only | Female only | Neotropical | -- | -- | -- |
| <i>L. lilliae</i>                 | Unknown     | Female only | Neotropical | -- | -- | -- |
| <i>L. goudoti</i>                 | Unknown     | Female only | Neotropical | -- | -- | -- |
| <i>Hylocharis xantusii</i>        | Female only | Female only | Neotropical | -- | -- | -- |
| <i>H. leucotis</i>                | Female only | Female only | Neotropical | -- | -- | -- |
| <i>H. eliciae</i>                 | Unknown     | Female only | Neotropical | -- | -- | -- |
| <i>H. sapphirina</i>              | Female only | Female only | Neotropical | -- | -- | -- |
| <i>H. cyanus</i>                  | Female only | Female only | Neotropical | -- | -- | -- |
| <i>H. pyropygia</i>               | Unknown     | Female only | Neotropical | -- | -- | -- |
| <i>H. chrysur</i>                 | Female only | Female only | Neotropical | -- | -- | -- |
| <i>H. grayi</i>                   | Unknown     | Female only | Neotropical | -- | -- | -- |
| <i>Chrysuronia oenone</i>         | Female only | Female only | Neotropical | -- | -- | -- |
| <i>Goldmania violiceps</i>        | Unknown     | Female only | Neotropical | -- | -- | -- |
| <i>Goethalsia bella</i>           | Unknown     | Female only | Neotropical | -- | -- | -- |
| <i>Trochilus polytmus</i>         | Female only | Female only | Neotropical | -- | -- | -- |
| <i>Leucochloris albicollis</i>    | Female only | Female only | Neotropical | -- | -- | -- |
| <i>Polytmus guainumbi</i>         | Female only | Female only | Neotropical | -- | -- | -- |
| <i>P. milleri</i>                 | Female only | Female only | Neotropical | -- | -- | -- |
| <i>P. theresiae</i>               | Female only | Female only | Neotropical | -- | -- | -- |
| <i>Leucippus fallax</i>           | Unknown     | Female only | Neotropical | -- | -- | -- |
| <i>L. baeri</i>                   | Unknown     | Female only | Neotropical | -- | -- | -- |
| <i>L. taczanowskii</i>            | Unknown     | Female only | Neotropical | -- | -- | -- |
| <i>L. chlorocercus</i>            | Female only | Female only | Neotropical | -- | -- | -- |
| <i>Taphrospilus hypostictus</i>   | Female only | Female only | Neotropical | -- | -- | -- |
| <i>Amazilia viridicauda</i>       | Female only | Female only | Neotropical | -- | -- | -- |
| <i>A. chionogaster</i>            | Female only | Female only | Neotropical | -- | -- | -- |
| <i>A. candida</i>                 | Female only | Female only | Neotropical | -- | -- | -- |
| <i>A. chionopectus</i>            | Female only | Female only | Neotropical | -- | -- | -- |
| <i>A. versicolor</i>              | Female only | Female only | Neotropical | -- | -- | -- |
| <i>A. luciae</i>                  | Female only | Female only | Neotropical | -- | -- | -- |
| <i>A. fimbriata</i>               | Female only | Female only | Neotropical | -- | -- | -- |

|                                  |             |             |             |    |    |    |
|----------------------------------|-------------|-------------|-------------|----|----|----|
| <i>A. distans</i>                | Unknown     | Female only | Neotropical | -- | -- | -- |
| <i>A. lactea</i>                 | Female only | Female only | Neotropical | -- | -- | -- |
| <i>A. amabilis</i>               | Female only | Female only | Neotropical | -- | -- | -- |
| <i>A. decora</i>                 | Subspp      | Subspp      | Neotropical | -- | -- | -- |
| <i>A. rosenbergi</i>             | Female only | Female only | Neotropical | -- | -- | -- |
| <i>A. boucardi</i>               | Female only | Female only | Neotropical | -- | -- | -- |
| <i>A. francaiae</i>              | Female only | Female only | Neotropical | -- | -- | -- |
| <i>A. leucogaster</i>            | Female only | Female only | Neotropical | -- | -- | -- |
| <i>A. cyanocephala</i>           | Female only | Female only | Neotropical | -- | -- | -- |
| <i>A. cyanifrons</i>             | Female only | Female only | Neotropical | -- | -- | -- |
| <i>A. beryllina</i>              | Female only | Female only | Neotropical | -- | -- | -- |
| <i>A. cyanura</i>                | Unknown     | Female only | Neotropical | -- | -- | -- |
| <i>A. saucerrottei</i>           | Female only | Female only | Neotropical | -- | -- | -- |
| <i>A. tobaci</i>                 | Female only | Female only | Neotropical | -- | -- | -- |
| <i>A. viridigaster</i>           | Female only | Female only | Neotropical | -- | -- | -- |
| <i>A. edward</i>                 | Female only | Female only | Neotropical | -- | -- | -- |
| <i>A. rutila</i>                 | Female only | Female only | Neotropical | -- | -- | -- |
| <i>A. yucatanensis</i>           | Female only | Female only | Neotropical | -- | -- | -- |
| <i>A. tzacatl</i>                | Female only | Female only | Neotropical | -- | -- | -- |
| <i>A. castaneiventris</i>        | Unknown     | Female only | Neotropical | -- | -- | -- |
| <i>A. amazilia</i>               | Female only | Female only | Neotropical | -- | -- | -- |
| <i>A. viridifrons</i>            | Female only | Female only | Neotropical | -- | -- | -- |
| <i>A. violiceps</i>              | Female only | Female only | Neotropical | -- | -- | -- |
| <i>Eupherusa poliocerca</i>      | Unknown     | Female only | Neotropical | -- | -- | -- |
| <i>E. eximia</i>                 | Unknown     | Female only | Neotropical | -- | -- | -- |
| <i>E. cyanophrys</i>             | Female only | Female only | Neotropical | -- | -- | -- |
| <i>E. nigriventris</i>           | Female only | Female only | Neotropical | -- | -- | -- |
| <i>Elvira chionura</i>           | Female only | Female only | Neotropical | -- | -- | -- |
| <i>E. cupreiceps</i>             | Female only | Female only | Neotropical | -- | -- | -- |
| <i>Microchera albocoronata</i>   | Female only | Female only | Neotropical | -- | -- | -- |
| <i>Chalybura buffonii</i>        | Unknown     | Female only | Neotropical | -- | -- | -- |
| <i>C. urochrysia</i>             | Female only | Female only | Neotropical | -- | -- | -- |
| <i>Aphantochroa cirrochloris</i> | Female only | Female only | Neotropical | -- | -- | -- |
| <i>Lampornis clemenciae</i>      | Female only | Female only | Neotropical | -- | -- | -- |
| <i>L. amethystinus</i>           | Female only | Female only | Neotropical | -- | -- | -- |
| <i>L. viridipallens</i>          | Unknown     | Female only | Neotropical | -- | -- | -- |
| <i>L. sybillae</i>               | Unknown     | Female only | Neotropical | -- | -- | -- |
| <i>L. hemileucus</i>             | Unknown     | Female only | Neotropical | -- | -- | -- |
| <i>L. castaneoventrtris</i>      | Female only | Female only | Neotropical | -- | -- | -- |
| <i>Lamprolaima rhami</i>         | Female only | Female only | Neotropical | -- | -- | -- |
| <i>Adelomyia melanogenys</i>     | Female only | Female only | Neotropical | -- | -- | -- |
| <i>Anthocephala floriceps</i>    | Unknown     | Female only | Neotropical | -- | -- | -- |
| <i>Phlogophilus hemileucurus</i> | Female only | Female only | Neotropical | -- | -- | -- |

|                                 |             |             |             |    |    |    |
|---------------------------------|-------------|-------------|-------------|----|----|----|
| <i>P. harterti</i>              | Unknown     | Female only | Neotropical | -- | -- | -- |
| <i>Clytolaema rubricauda</i>    | Female only | Female only | Neotropical | -- | -- | -- |
| <i>Heliodoxa imperatrix</i>     | Unknown     | Female only | Neotropical | -- | -- | -- |
| <i>H. xanthogonys</i>           | Unknown     | Female only | Neotropical | -- | -- | -- |
| <i>H. gularis</i>               | Unknown     | Female only | Neotropical | -- | -- | -- |
| <i>H. branickii</i>             | Unknown     | Female only | Neotropical | -- | -- | -- |
| <i>H. schreibersii</i>          | Female only | Female only | Neotropical | -- | -- | -- |
| <i>H. aurescens</i>             | Female only | Female only | Neotropical | -- | -- | -- |
| <i>H. rubinoides</i>            | Female only | Female only | Neotropical | -- | -- | -- |
| <i>H. jacula</i>                | Unknown     | Female only | Neotropical | -- | -- | -- |
| <i>H. leadbeateri</i>           | Female only | Female only | Neotropical | -- | -- | -- |
| <i>Eugenes fulgens</i>          | Female only | Female only | Neotropical | -- | -- | -- |
| <i>Hylonympha macrocerca</i>    | Unknown     | Female only | Neotropical | -- | -- | -- |
| <i>Sternoclyta cyanopectus</i>  | Female only | Female only | Neotropical | -- | -- | -- |
| <i>Topaza pyra</i>              | Subspp      | Subspp      | Neotropical | -- | -- | -- |
| <i>T. pella</i>                 | Female only | Female only | Neotropical | -- | -- | -- |
| <i>Oreotrochilus chimborazo</i> | Female only | Female only | Neotropical | -- | -- | -- |
| <i>O. estella</i>               | Female only | Female only | Neotropical | -- | -- | -- |
| <i>O. leucopleurus</i>          | Unknown     | Female only | Neotropical | -- | -- | -- |
| <i>O. melanogaster</i>          | Unknown     | Female only | Neotropical | -- | -- | -- |
| <i>O. adela</i>                 | Unknown     | Female only | Neotropical | -- | -- | -- |
| <i>Urochroa bougueri</i>        | Female only | Female only | Neotropical | -- | -- | -- |
| <i>Patagona gigas</i>           | Female only | Female only | Neotropical | -- | -- | -- |
| <i>Aglaeactis cupripennis</i>   | Female only | Female only | Neotropical | -- | -- | -- |
| <i>A. castelnaudii</i>          | Unknown     | Female only | Neotropical | -- | -- | -- |
| <i>A. aliciae</i>               | Unknown     | Female only | Neotropical | -- | -- | -- |
| <i>A. pamela</i>                | Unknown     | Female only | Neotropical | -- | -- | -- |
| <i>Lafresnaya lafresnayi</i>    | Female only | Female only | Neotropical | -- | -- | -- |
| <i>Pterophanes cyanopterus</i>  | Female only | Female only | Neotropical | -- | -- | -- |
| <i>Coeligena coeligena</i>      | Female only | Female only | Neotropical | -- | -- | -- |
| <i>C. wilsoni</i>               | Female only | Female only | Neotropical | -- | -- | -- |
| <i>C. prunellei</i>             | Unknown     | Female only | Neotropical | -- | -- | -- |
| <i>C. torquata</i>              | Female only | Female only | Neotropical | -- | -- | -- |
| <i>C. phalerata</i>             | Unknown     | Female only | Neotropical | -- | -- | -- |
| <i>C. orina</i>                 | Subspp      | Subspp      | Neotropical | -- | -- | -- |
| <i>C. bonapartei</i>            | Unknown     | Female only | Neotropical | -- | -- | -- |
| <i>C. helianthea</i>            | Unknown     | Female only | Neotropical | -- | -- | -- |
| <i>C. lutetiae</i>              | Female only | Female only | Neotropical | -- | -- | -- |
| <i>C. violifer</i>              | Unknown     | Female only | Neotropical | -- | -- | -- |
| <i>C. iris</i>                  | Unknown     | Female only | Neotropical | -- | -- | -- |
| <i>Ensifera ensifera</i>        | Unknown     | Female only | Neotropical | -- | -- | -- |
| <i>Sephanoides sephaniodes</i>  | Unknown     | Female only | Neotropical | -- | -- | -- |
| <i>S. fernandensis</i>          | Unknown     | Female only | Neotropical | -- | -- | -- |



|                                   |             |             |             |    |    |    |
|-----------------------------------|-------------|-------------|-------------|----|----|----|
| <i>Boissonneaua flavescens</i>    | Female only | Female only | Neotropical | -- | -- | -- |
| <i>B. matthewsii</i>              | Female only | Female only | Neotropical | -- | -- | -- |
| <i>B. jardini</i>                 | Female only | Female only | Neotropical | -- | -- | -- |
| <i>Heliangelus mavors</i>         | Female only | Female only | Neotropical | -- | -- | -- |
| <i>H. spencei</i>                 | Female only | Female only | Neotropical | -- | -- | -- |
| <i>H. amethysticollis</i>         | Female only | Female only | Neotropical | -- | -- | -- |
| <i>H. strophianus</i>             | Female only | Female only | Neotropical | -- | -- | -- |
| <i>H. exortis</i>                 | Female only | Female only | Neotropical | -- | -- | -- |
| <i>H. viola</i>                   | Female only | Female only | Neotropical | -- | -- | -- |
| <i>H. regalis</i>                 | Female only | Female only | Neotropical | -- | -- | -- |
| <i>Eriocnemis nigrivestis</i>     | Female only | Female only | Neotropical | -- | -- | -- |
| <i>E. vestitus</i>                | Female only | Female only | Neotropical | -- | -- | -- |
| <i>E. godini</i>                  | Female only | Female only | Neotropical | -- | -- | -- |
| <i>E. luciani</i>                 | Female only | Female only | Neotropical | -- | -- | -- |
| <i>E. cupreovertris</i>           | Female only | Female only | Neotropical | -- | -- | -- |
| <i>E. mosquera</i>                | Female only | Female only | Neotropical | -- | -- | -- |
| <i>E. glaucopoides</i>            | Female only | Female only | Neotropical | -- | -- | -- |
| <i>E. mirabilis</i>               | Unknown     | Female only | Neotropical | -- | -- | -- |
| <i>E. alinae</i>                  | Unknown     | Female only | Neotropical | -- | -- | -- |
| <i>E. derbyi</i>                  | Female only | Female only | Neotropical | -- | -- | -- |
| <i>Haplophaedia aureliae</i>      | Female only | Female only | Neotropical | -- | -- | -- |
| <i>H. lugens</i>                  | Female only | Female only | Neotropical | -- | -- | -- |
| <i>Urosticte benjamini</i>        | Female only | Female only | Neotropical | -- | -- | -- |
| <i>U. ruficrissa</i>              | Female only | Female only | Neotropical | -- | -- | -- |
| <i>Ocreatus underwoodii</i>       | Female only | Female only | Neotropical | -- | -- | -- |
| <i>Lesbia victoriae</i>           | Female only | Female only | Neotropical | -- | -- | -- |
| <i>L. nuna</i>                    | Female only | Female only | Neotropical | -- | -- | -- |
| <i>Sappho sparganura</i>          | Female only | Female only | Neotropical | -- | -- | -- |
| <i>Polyonymus caroli</i>          | Unknown     | Female only | Neotropical | -- | -- | -- |
| <i>Ramphomicron microrhynchum</i> | Female only | Female only | Neotropical | -- | -- | -- |
| <i>R. dorsale</i>                 | Unknown     | Female only | Neotropical | -- | -- | -- |
| <i>Metallura williami</i>         | Female only | Female only | Neotropical | -- | -- | -- |
| <i>M. baroni</i>                  | Female only | Female only | Neotropical | -- | -- | -- |
| <i>M. odomae</i>                  | Female only | Female only | Neotropical | -- | -- | -- |
| <i>M. theresiae</i>               | Female only | Female only | Neotropical | -- | -- | -- |
| <i>M. eupogon</i>                 | Female only | Female only | Neotropical | -- | -- | -- |
| <i>M. aeneocauda</i>              | Unknown     | Female only | Neotropical | -- | -- | -- |
| <i>M. phoebe</i>                  | Female only | Female only | Neotropical | -- | -- | -- |
| <i>M. tyrianthina</i>             | Female only | Female only | Neotropical | -- | -- | -- |
| <i>M. iracunda</i>                | Unknown     | Female only | Neotropical | -- | -- | -- |
| <i>Chalcostigma ruficeps</i>      | Female only | Female only | Neotropical | -- | -- | -- |
| <i>C. olivaceum</i>               | Female only | Female only | Neotropical | -- | -- | -- |
| <i>C. stanleyi</i>                | Female only | Female only | Neotropical | -- | -- | -- |

|                                  |             |             |             |    |    |    |
|----------------------------------|-------------|-------------|-------------|----|----|----|
| <i>C. heteropogon</i>            | Female only | Female only | Neotropical | -- | -- | -- |
| <i>C. herrani</i>                | Female only | Female only | Neotropical | -- | -- | -- |
| <i>Oxyopogon guerinii</i>        | Female only | Female only | Neotropical | -- | -- | -- |
| <i>Opisthoprora euryptera</i>    | Unknown     | Female only | Neotropical | -- | -- | -- |
| <i>Taphrolesia griseiventris</i> | Unknown     | Female only | Neotropical | -- | -- | -- |
| <i>Aglaiocercus kingi</i>        | Female only | Female only | Neotropical | -- | -- | -- |
| <i>A. coelestis</i>              | Female only | Female only | Neotropical | -- | -- | -- |
| <i>Oreonympha nobilis</i>        | Unknown     | Female only | Neotropical | -- | -- | -- |
| <i>Augastes lumachellus</i>      | Female only | Female only | Neotropical | -- | -- | -- |
| <i>A. scutatus</i>               | Female only | Female only | Neotropical | -- | -- | -- |
| <i>A. geoffroyi</i>              | Female only | Female only | Neotropical | -- | -- | -- |
| <i>Heliothryx barroti</i>        | Female only | Female only | Neotropical | -- | -- | -- |
| <i>H. aurita</i>                 | Female only | Female only | Neotropical | -- | -- | -- |
| <i>Heliactin cornuta</i>         | Female only | Female only | Neotropical | -- | -- | -- |
| <i>Loddigesia mirabilis</i>      | Unknown     | Female only | Neotropical | -- | -- | -- |
| <i>Heliomaster constantii</i>    | Unknown     | Female only | Neotropical | -- | -- | -- |
| <i>H. longirostris</i>           | Female only | Female only | Neotropical | -- | -- | -- |
| <i>H. squamosus</i>              | Female only | Female only | Neotropical | -- | -- | -- |
| <i>H. furcifer</i>               | Female only | Female only | Neotropical | -- | -- | -- |
| <i>Rhodopis vesper</i>           | Female only | Female only | Neotropical | -- | -- | -- |
| <i>Thaumastura cora</i>          | Female only | Female only | Neotropical | -- | -- | -- |
| <i>Philodice bryantae</i>        | Female only | Female only | Neotropical | -- | -- | -- |
| <i>P. mitchellii</i>             | Female only | Female only | Neotropical | -- | -- | -- |
| <i>Doricha enicura</i>           | Unknown     | Female only | Neotropical | -- | -- | -- |
| <i>D. eliza</i>                  | Female only | Female only | Neotropical | -- | -- | -- |
| <i>Tilmatura dupontii</i>        | Unknown     | Female only | Neotropical | -- | -- | -- |
| <i>Microstilbon burmeisteri</i>  | Unknown     | Female only | Neotropical | -- | -- | -- |
| <i>Calothorax lucifer</i>        | Female only | Female only | Neotropical | -- | -- | -- |
| <i>C. pulcher</i>                | Female only | Female only | Neotropical | -- | -- | -- |
| <i>Archilochus colubris</i>      | Female only | Female only | Nearctic    | -- | -- | -- |
| <i>A. alexandri</i>              | Female only | Female only | Nearctic    | -- | -- | -- |
| <i>Calypte anna</i>              | Female only | Female only | Nearctic    | -- | -- | -- |
| <i>C. costae</i>                 | Female only | Female only | Nearctic    | -- | -- | -- |
| <i>Calliphlox evelynae</i>       | Female only | Female only | Neotropical | -- | -- | -- |
| <i>C. amethystina</i>            | Female only | Female only | Neotropical | -- | -- | -- |
| <i>Mellisuga helenae</i>         | Female only | Female only | Neotropical | -- | -- | -- |
| <i>M. minima</i>                 | Female only | Female only | Neotropical | -- | -- | -- |
| <i>Stellula calliope</i>         | Female only | Female only | Nearctic    | -- | -- | -- |
| <i>Atthis heloisa</i>            | Unknown     | Female only | Neotropical | -- | -- | -- |
| <i>A. ellioti</i>                | Unknown     | Female only | Neotropical | -- | -- | -- |
| <i>Myrtis fanny</i>              | Female only | Female only | Neotropical | -- | -- | -- |
| <i>Eulidia yarrellii</i>         | Unknown     | Female only | Neotropical | -- | -- | -- |
| <i>Myrmia micrura</i>            | Female only | Female only | Neotropical | -- | -- | -- |

|                                |             |             |             |    |    |    |
|--------------------------------|-------------|-------------|-------------|----|----|----|
| <i>Acestrura mulsant</i>       | Unknown     | Female only | Neotropical | -- | -- | -- |
| <i>A. bombus</i>               | Unknown     | Female only | Neotropical | -- | -- | -- |
| <i>A. heliodor</i>             | Unknown     | Female only | Neotropical | -- | -- | -- |
| <i>A. astreans</i>             | Unknown     | Female only | Neotropical | -- | -- | -- |
| <i>A. berlepschi</i>           | Unknown     | Female only | Neotropical | -- | -- | -- |
| <i>Chaetocercus jordanii</i>   | Unknown     | Female only | Neotropical | -- | -- | -- |
| <i>Selasphorus platycercus</i> | Female only | Female only | Neotropical | -- | -- | -- |
| <i>S. rufus</i>                | Female only | Female only | Neotropical | -- | -- | -- |
| <i>S. sasin</i>                | Female only | Female only | Neotropical | -- | -- | -- |
| <i>S. flammula</i>             | Unknown     | Female only | Neotropical | -- | -- | -- |
| <i>S. scintilla</i>            | Unknown     | Female only | Neotropical | -- | -- | -- |
| <i>S. ardens</i>               | Unknown     | Female only | Neotropical | -- | -- | -- |

**Musophagiformes: Musophagidae**

|                                |             |             |        |       |      |     |     |       |
|--------------------------------|-------------|-------------|--------|-------|------|-----|-----|-------|
| <i>Corythaeola cristata</i>    | Cooperation | Cooperation | Africa | [166] | bbbe | [3] | a   | [167] |
| <i>Corythaixoides concolor</i> | Cooperation | Cooperation | Africa | --    | --   | --  | ba  | --    |
| <i>C. personatus</i>           | Unknown     | Cooperation | Africa | --    | --   | --  | --  | --    |
| <i>C. leucogaster</i>          | Cooperation | Cooperation | Africa | --    | --   | --  | --  | --    |
| <i>Crinifer piscator</i>       | Suspected   | Cooperation | Africa | --    | --   | --  | --  | --    |
| <i>C. zonurus</i>              | Pair        | Pair        | Africa | --    | --   | --  | --  | --    |
| <i>Tauraco persa</i>           | Pair        | Pair        | Africa | --    | --   | --  | bb  | --    |
| <i>T. schuettii</i>            | Pair        | Pair        | Africa | --    | --   | --  | --  | --    |
| <i>T. schalowi</i>             | Pair        | Pair        | Africa | --    | --   | --  | --  | --    |
| <i>T. fischeri</i>             | Unknown     | Pair        | Africa | --    | --   | --  | --  | --    |
| <i>T. livingstonii</i>         | Pair        | Pair        | Africa | --    | --   | --  | --  | --    |
| <i>T. corythaix</i>            | Pair        | Pair        | Africa | --    | --   | --  | --  | --    |
| <i>T. bannermani</i>           | Pair        | Pair        | Africa | --    | --   | --  | --  | --    |
| <i>T. erythrolophus</i>        | Captivity   | Pair        | Africa | [168] | --   | --  | --  | --    |
| <i>T. macrorhynchus</i>        | Pair        | Pair        | Africa | [166] | --   | --  | --  | --    |
| <i>T. leucotis</i>             | Unknown     | Pair        | Africa | --    | --   | --  | --  | --    |
| <i>T. ruspolii</i>             | Unknown     | Pair        | Africa | --    | --   | --  | --  | --    |
| <i>T. hartlaubi</i>            | Pair        | Pair        | Africa | --    | --   | --  | --  | --    |
| <i>T. leucolophus</i>          | Captivity   | Pair        | Africa | [168] | --   | --  | --  | --    |
| <i>Musophaga violacea</i>      | Captivity   | Pair        | Africa | --    | --   | --  | --  | --    |
| <i>M. rossae</i>               | Pair        | Pair        | Africa | [166] | --   | --  | --  | --    |
| <i>Gallirex johnstoni</i>      | Unknown     | Pair        | Africa | --    | --   | --  | bbb | --    |
| <i>G. porphyreolopha</i>       | Pair        | Pair        | Africa | --    | --   | --  | --  | --    |

**Strigiformes: Tytonidae**

|                         |         |      |             |       |      |     |
|-------------------------|---------|------|-------------|-------|------|-----|
| <i>Tyto tenebricosa</i> | Pair    | Pair | Australia   | [169] | bbbf | [3] |
| <i>T. multipunctata</i> | Pair    | Pair | Australia   | --    | --   | --  |
| <i>T. inexpectata</i>   | Unknown | Pair | Indomalayan | --    | --   | --  |
| <i>T. nigrobrunnea</i>  | Unknown | Pair | Indomalayan | --    | --   | --  |
| <i>T. sororcula</i>     | Unknown | Pair | Australia   | --    | --   | --  |
| <i>T. manusi</i>        | Unknown | Pair | Australia   | --    | --   | --  |

|                                |            |      |             |            |        |     |
|--------------------------------|------------|------|-------------|------------|--------|-----|
| <i>T. aurantia</i>             | Unknown    | Pair | Australia   | --         | --     | --  |
| <i>T. novaehollandiae</i>      | Pair       | Pair | Australia   | --         | --     | --  |
| <i>T. castanops</i>            | Pair       | Pair | Australia   | --         | --     | --  |
| <i>T. rosenbergii</i>          | Unknown    | Pair | Indomalayan | --         | --     | --  |
| <i>T. soumagnei</i>            | Unknown    | Pair | Africa      | --         | --     | --  |
| <i>T. alba</i>                 | Pair       | Pair | Widespread  | --         | --     | --  |
| <i>T. glaucops</i>             | Pair       | Pair | Neotropical | --         | --     | --  |
| <i>T. capensis</i>             | Pair       | Pair | Africa      | --         | --     | --  |
| <i>T. longimembris</i>         | Pair       | Pair | Widespread  | --         | --     | --  |
| <i>Phodilus prigoginei</i>     | Unknown    | Pair | Africa      | --         | --     | --  |
| <i>P. badius</i>               | Pair       | Pair | Indomalayan | --         | --     | --  |
| <b>Strigiformes: Strigidae</b> |            |      |             |            |        |     |
| <i>Otus sagittatus</i>         | Unknown    | Pair | Indomalayan | [169]      | bbbfab | [3] |
| <i>O. rufescens</i>            | Unknown    | Pair | Indomalayan | --         | --     | --  |
| <i>O. icterorhynchus</i>       | Unknown    | Pair | Africa      | --         | --     | --  |
| <i>O. ireneae</i>              | Unknown    | Pair | Africa      | --         | --     | --  |
| <i>O. balli</i>                | Pair       | Pair | Indomalayan | --         | --     | --  |
| <i>O. spilocephalus</i>        | Pair       | Pair | Indomalayan | --         | --     | --  |
| <i>O. umbra</i>                | Unknown    | Pair | Indomalayan | --         | --     | --  |
| <i>O. angelinae</i>            | Unknown    | Pair | Indomalayan | --         | --     | --  |
| <i>O. manadensis</i>           | Unknown    | Pair | Indomalayan | --         | --     | --  |
| <i>O. longicornis</i>          | Unknown    | Pair | Indomalayan | --         | --     | --  |
| <i>O. mindorensis</i>          | Unknown    | Pair | Indomalayan | --         | --     | --  |
| <i>O. mirus</i>                | Unknown    | Pair | Indomalayan | --         | --     | --  |
| <i>O. hartlaubi</i>            | Unknown    | Pair | Africa      | --         | --     | --  |
| <i>O. brucei</i>               | Pair       | Pair | Palaearctic | --         | --     | --  |
| <i>O. flammeolus</i>           | Pair       | Pair | Nearctic    | --         | --     | --  |
| <i>O. scops</i>                | Pair       | Pair | Widespread  | --         | --     | --  |
| <i>O. elegans</i>              | Pair       | Pair | Palaearctic | --         | --     | --  |
| <i>O. mantananensis</i>        | Unknown    | Pair | Indomalayan | --         | --     | --  |
| <i>O. magicus</i>              | Unknown    | Pair | Australia   | --         | --     | --  |
| <i>O. rutilus</i>              | Pair       | Pair | Africa      | --         | --     | --  |
| <i>O. pauliani</i>             | Unknown    | Pair | Africa      | --         | --     | --  |
| <i>O. brookii</i>              | Pair       | Pair | Indomalayan | --         | --     | --  |
| <i>O. bakkamoena</i>           | Pair       | Pair | Indomalayan | --         | --     | --  |
| <i>O. mentawi</i>              | Unknown    | Pair | Indomalayan | --         | --     | --  |
| <i>O. fuliginosus</i>          | Unknown    | Pair | Indomalayan | --         | --     | --  |
| <i>O. megalotis</i>            | Unknown    | Pair | Indomalayan | --         | --     | --  |
| <i>O. silvicola</i>            | Unknown    | Pair | Indomalayan | --         | --     | --  |
| <i>O. leucotis</i>             | Pair       | Pair | Africa      | --         | --     | --  |
| <i>O. kennicottii</i>          | Pair       | Pair | Nearctic    | --         | --     | --  |
| <i>O. asio</i>                 | Occasional | Pair | Nearctic    | [169, 170] | --     | --  |
| <i>O. trichopsis</i>           | Pair       | Pair | Neotropical | [169]      | --     | --  |

|                            |            |        |             |            |    |    |
|----------------------------|------------|--------|-------------|------------|----|----|
| <i>O. choliba</i>          | Pair       | Pair   | Neotropical | --         | -- | -- |
| <i>O. koepckeae</i>        | Unknown    | Pair   | Neotropical | --         | -- | -- |
| <i>O. roboratus</i>        | Unknown    | Pair   | Neotropical | --         | -- | -- |
| <i>O. clarkii</i>          | Unknown    | Pair   | Neotropical | --         | -- | -- |
| <i>O. barbarus</i>         | Unknown    | Pair   | Neotropical | --         | -- | -- |
| <i>O. ingens</i>           | Unknown    | Pair   | Neotropical | --         | -- | -- |
| <i>O. marshalli</i>        | Unknown    | Pair   | Neotropical | --         | -- | -- |
| <i>O. watsonii</i>         | Unknown    | Pair   | Neotropical | --         | -- | -- |
| <i>O. atricapillus</i>     | Pair       | Pair   | Neotropical | --         | -- | -- |
| <i>O. vermiculatus</i>     | Unknown    | Pair   | Neotropical | --         | -- | -- |
| <i>O. sanctaecatarinae</i> | Pair       | Pair   | Neotropical | --         | -- | -- |
| <i>O. lawrencii</i>        | Pair       | Pair   | Neotropical | --         | -- | -- |
| <i>O. nudipes</i>          | Pair       | Pair   | Neotropical | --         | -- | -- |
| <i>O. podarginus</i>       | Unknown    | Pair   | Australia   | --         | -- | -- |
| <i>O. albogularis</i>      | Unknown    | Pair   | Neotropical | --         | -- | -- |
| <i>Mimizuku gurneyi</i>    | Unknown    | Pair   | Indomalayan | --         | -- | -- |
| <i>Bubo virginianus</i>    | Pair       | Pair   | Widespread  | --         | -- | -- |
| <i>B. bubo</i>             | Pair       | Pair   | Palaearctic | --         | -- | -- |
| <i>B. bengalensis</i>      | Pair       | Pair   | Indomalayan | --         | -- | -- |
| <i>B. ascalaphus</i>       | Pair       | Pair   | Palaearctic | --         | -- | -- |
| <i>B. capensis</i>         | Pair       | Pair   | Africa      | --         | -- | -- |
| <i>B. africanus</i>        | Pair       | Pair   | Africa      | --         | -- | -- |
| <i>B. poensis</i>          | Unknown    | Pair   | Africa      | --         | -- | -- |
| <i>B. vosseleri</i>        | Subspp     | Subspp | Africa      | --         | -- | -- |
| <i>B. nipalensis</i>       | Pair       | Pair   | Indomalayan | --         | -- | -- |
| <i>B. sumatranus</i>       | Pair       | Pair   | Indomalayan | --         | -- | -- |
| <i>B. shelleyi</i>         | Unknown    | Pair   | Africa      | --         | -- | -- |
| <i>B. lacteus</i>          | Occasional | Pair   | Africa      | [169, 171] | -- | -- |
| <i>B. coromandus</i>       | Unknown    | Pair   | Indomalayan | [169]      | -- | -- |
| <i>B. leucostictus</i>     | Unknown    | Pair   | Africa      | --         | -- | -- |
| <i>B. philippensis</i>     | Unknown    | Pair   | Indomalayan | --         | -- | -- |
| <i>Ketupa blakistoni</i>   | Pair       | Pair   | Palaearctic | --         | -- | -- |
| <i>K. zeylonensis</i>      | Unknown    | Pair   | Indomalayan | --         | -- | -- |
| <i>K. flavipes</i>         | Unknown    | Pair   | Palaearctic | --         | -- | -- |
| <i>K. ketupu</i>           | Unknown    | Pair   | Indomalayan | --         | -- | -- |
| <i>Scotopelia peli</i>     | Pair       | Pair   | Africa      | --         | -- | -- |
| <i>S. ussheri</i>          | Unknown    | Pair   | Africa      | --         | -- | -- |
| <i>S. bouvieri</i>         | Pair       | Pair   | Australia   | --         | -- | -- |
| <i>Nyctea scandiaca</i>    | Pair       | Pair   | Holarctic   | --         | -- | -- |
| <i>Strix seloputo</i>      | Unknown    | Pair   | Indomalayan | --         | -- | -- |
| <i>S. ocellata</i>         | Unknown    | Pair   | Indomalayan | --         | -- | -- |
| <i>S. leptogrammica</i>    | Unknown    | Pair   | Indomalayan | --         | -- | -- |
| <i>S. aluco</i>            | Pair       | Pair   | Palaearctic | --         | -- | -- |

|                                |            |        |             |            |    |    |
|--------------------------------|------------|--------|-------------|------------|----|----|
| <i>S. butleri</i>              | Pair       | Pair   | Palaearctic | --         | -- | -- |
| <i>S. occidentalis</i>         | Pair       | Pair   | Nearctic    | --         | -- | -- |
| <i>S. varia</i>                | Pair       | Pair   | Nearctic    | --         | -- | -- |
| <i>S. fulvescens</i>           | Pair       | Pair   | Neotropical | --         | -- | -- |
| <i>S. hylophila</i>            | Pair       | Pair   | Neotropical | --         | -- | -- |
| <i>S. rufipes</i>              | Unknown    | Pair   | Neotropical | --         | -- | -- |
| <i>S. uralensis</i>            | Pair       | Pair   | Palaearctic | --         | -- | -- |
| <i>S. davidi</i>               | Unknown    | Pair   | Palaearctic | --         | -- | -- |
| <i>S. nebulosa</i>             | Occasional | Pair   | Holarctic   | [169, 172] | -- | -- |
| <i>S. virgata</i>              | Pair       | Pair   | Neotropical | [169]      | -- | -- |
| <i>S. nigrolineata</i>         | Pair       | Pair   | Neotropical | --         | -- | -- |
| <i>S. huhula</i>               | Unknown    | Pair   | Neotropical | --         | -- | -- |
| <i>S. albitarsus</i>           | Unknown    | Pair   | Neotropical | --         | -- | -- |
| <i>S. woodfordii</i>           | Pair       | Pair   | Africa      | --         | -- | -- |
| <i>Jubula lettii</i>           | Pair       | Pair   | Africa      | --         | -- | -- |
| <i>Lophotrix cristata</i>      | Unknown    | Pair   | Neotropical | --         | -- | -- |
| <i>Pulsatrix perspicillata</i> | Pair       | Pair   | Neotropical | --         | -- | -- |
| <i>P. melanota</i>             | Unknown    | Pair   | Neotropical | --         | -- | -- |
| <i>P. koeniswaldiana</i>       | Pair       | Pair   | Neotropical | --         | -- | -- |
| <i>Surnia ulula</i>            | Pair       | Pair   | Holarctic   | --         | -- | -- |
| <i>Glaucidium passerinum</i>   | Pair       | Pair   | Palaearctic | --         | -- | -- |
| <i>G. brodiei</i>              | Unknown    | Pair   | Widespread  | --         | -- | -- |
| <i>G. perlatum</i>             | Pair       | Pair   | Africa      | --         | -- | -- |
| <i>G. californicum</i>         | Pair       | Pair   | Nearctic    | --         | -- | -- |
| <i>G. gnoma</i>                | Pair       | Pair   | Neotropical | --         | -- | -- |
| <i>G. jardini</i>              | Unknown    | Pair   | Neotropical | --         | -- | -- |
| <i>G. bolivianum</i>           | Pair       | Pair   | Neotropical | --         | -- | -- |
| <i>G. hardyi</i>               | Unknown    | Pair   | Neotropical | --         | -- | -- |
| <i>G. minutissimum</i>         | Unknown    | Pair   | Neotropical | --         | -- | -- |
| <i>G. brasilianum</i>          | Pair       | Pair   | Neotropical | --         | -- | -- |
| <i>G. peruanum</i>             | Pair       | Pair   | Neotropical | --         | -- | -- |
| <i>G. nanum</i>                | Pair       | Pair   | Neotropical | --         | -- | -- |
| <i>G. siju</i>                 | Pair       | Pair   | Neotropical | --         | -- | -- |
| <i>G. tephronotum</i>          | Unknown    | Pair   | Africa      | --         | -- | -- |
| <i>G. sjostedti</i>            | Pair       | Pair   | Africa      | --         | -- | -- |
| <i>G. cuculoides</i>           | Unknown    | Pair   | Palaearctic | --         | -- | -- |
| <i>G. castanopterum</i>        | Unknown    | Pair   | Indomalayan | --         | -- | -- |
| <i>G. radiatum</i>             | Pair       | Pair   | Indomalayan | --         | -- | -- |
| <i>G. castanonotum</i>         | Unknown    | Pair   | Indomalayan | --         | -- | -- |
| <i>G. capense</i>              | Pair       | Pair   | Africa      | --         | -- | -- |
| <i>G. castaneum</i>            | Unknown    | Pair   | Africa      | --         | -- | -- |
| <i>G. ngamiense</i>            | Subspp     | Subspp | Africa      | --         | -- | -- |
| <i>G. scheffleri</i>           | Subspp     | Subspp | Africa      | --         | -- | -- |

|                                           |            |      |             |            |         |            |
|-------------------------------------------|------------|------|-------------|------------|---------|------------|
| <i>G. albertinum</i>                      | Unknown    | Pair | Africa      | --         | --      | --         |
| <i>Xenoglaux loweryi</i>                  | Unknown    | Pair | Neotropical | --         | --      | --         |
| <i>Micrathene whitneyi</i>                | Pair       | Pair | Neotropical | --         | --      | --         |
| <i>Athene noctua</i>                      | Pair       | Pair | Palaearctic | --         | --      | --         |
| <i>A. brama</i>                           | Pair       | Pair | Indomalayan | --         | --      | --         |
| <i>A. blewitti</i>                        | Unknown    | Pair | Indomalayan | --         | --      | --         |
| <i>Speotyto cunicularia</i>               | Occasional | Pair | Widespread  | [169, 173] | --      | --         |
| <i>Aegolius funereus</i>                  | Pair       | Pair | Holarctic   | [169]      | --      | --         |
| <i>A. acadicus</i>                        | Pair       | Pair | Nearctic    | --         | --      | --         |
| <i>A. harrisii</i>                        | Unknown    | Pair | Neotropical | --         | --      | --         |
| <i>Ninox rufa</i>                         | Pair       | Pair | Australia   | --         | --      | --         |
| <i>N. strenua</i>                         | Pair       | Pair | Australia   | --         | --      | --         |
| <i>N. connivens</i>                       | Pair       | Pair | Australia   | --         | --      | --         |
| <i>N. rudolfi</i>                         | Unknown    | Pair | Australia   | --         | --      | --         |
| <i>N. boobook</i>                         | Pair       | Pair | Australia   | --         | --      | --         |
| <i>N. novaeseelandiae</i>                 | Pair       | Pair | Australia   | --         | --      | --         |
| <i>N. scutulata</i>                       | Pair       | Pair | Widespread  | --         | --      | --         |
| <i>N. affinis</i>                         | Unknown    | Pair | Indomalayan | --         | --      | --         |
| <i>N. supercilialis</i>                   | Unknown    | Pair | Africa      | --         | --      | --         |
| <i>N. philippensis</i>                    | Unknown    | Pair | Indomalayan | --         | --      | --         |
| <i>N. ochracea</i>                        | Unknown    | Pair | Indomalayan | --         | --      | --         |
| <i>N. squamipila</i>                      | Unknown    | Pair | Australia   | --         | --      | --         |
| <i>N. theomacha</i>                       | Unknown    | Pair | Australia   | --         | --      | --         |
| <i>N. meeki</i>                           | Unknown    | Pair | Australia   | --         | --      | --         |
| <i>N. punctulata</i>                      | Unknown    | Pair | Indomalayan | --         | --      | --         |
| <i>N. variegata</i>                       | Unknown    | Pair | Australia   | --         | --      | --         |
| <i>N. odiosa</i>                          | Unknown    | Pair | Australia   | --         | --      | --         |
| <i>N. jacquinoti</i>                      | Unknown    | Pair | Australia   | --         | --      | --         |
| <i>Uroglaux dimorpha</i>                  | Unknown    | Pair | Australia   | --         | --      | --         |
| <i>Sceloglaux albifacies</i>              | Pair       | Pair | Australia   | --         | --      | --         |
| <i>Pseudoscops grammicus</i>              | Pair       | Pair | Neotropical | --         | --      | --         |
| <i>Asio stygius</i>                       | Pair       | Pair | Neotropical | --         | --      | --         |
| <i>A. otus</i>                            | Occasional | Pair | Holarctic   | [169, 174] | --      | --         |
| <i>A. abyssinicus</i>                     | Unknown    | Pair | Africa      | [169]      | --      | --         |
| <i>A. madagascariensis</i>                | Unknown    | Pair | Africa      | --         | --      | --         |
| <i>A. clamator</i>                        | Pair       | Pair | Neotropical | --         | --      | --         |
| <i>A. flammeus</i>                        | Pair       | Pair | Widespread  | --         | --      | --         |
| <i>A. capensis</i>                        | Pair       | Pair | Africa      | --         | --      | --         |
| <i>Nesasio solomonensis</i>               | Unknown    | Pair | Australia   | --         | --      | --         |
| <b>Caprimulgiformes: Steatornithidae</b>  |            |      |             |            |         |            |
| <i>Steatornis caripensis</i>              | Pair       | Pair | Neotropical | [175]      | bbbfba  | [136, 176] |
| <b>Caprimulgiformes: Batrachostomidae</b> |            |      |             |            |         |            |
| <i>Batrachostomus auritus</i>             | Unknown    | Pair | Indomalayan | [175]      | bbbfbaa | [136, 176] |

|                                        |         |        |             |       |          |            |
|----------------------------------------|---------|--------|-------------|-------|----------|------------|
| <i>B. harterti</i>                     | Unknown | Pair   | Indomalayan | --    | --       | --         |
| <i>B. septimus</i>                     | Unknown | Pair   | Indomalayan | --    | --       | --         |
| <i>B. stellatus</i>                    | Unknown | Pair   | Indomalayan | --    | --       | --         |
| <i>B. moniliger</i>                    | Pair    | Pair   | Indomalayan | --    | --       | --         |
| <i>B. hodgsoni</i>                     | Pair    | Pair   | Indomalayan | --    | --       | --         |
| <i>B. poliophus</i>                    | Unknown | Pair   | Indomalayan | --    | --       | --         |
| <i>B. mixtus</i>                       | Subspp  | Subspp | Indomalayan | --    | --       | --         |
| <i>B. affinis</i>                      | Subspp  | Subspp | Indomalayan | --    | --       | --         |
| <i>B. javensis</i>                     | Pair    | Pair   | Indomalayan | --    | --       | --         |
| <i>B. cornutus</i>                     | Unknown | Pair   | Indomalayan | --    | --       | --         |
| <b>Caprimulgiformes: Podargidae</b>    |         |        |             |       |          |            |
| <i>Podargus strigoides</i>             | Pair    | Pair   | Australia   | [175] | bbbfbbab | [136, 176] |
| <i>P. papuensis</i>                    | Pair    | Pair   | Australia   | --    | --       | --         |
| <i>P. ocellatus</i>                    | Pair    | Pair   | Australia   | --    | --       | --         |
| <b>Caprimulgiformes: Nyctibiidae</b>   |         |        |             |       |          |            |
| <i>Nyctibius grandis</i>               | Unknown | Pair   | Neotropical | [175] | bbbfbbba | [136, 176] |
| <i>N. aethereus</i>                    | Unknown | Pair   | Neotropical | --    | --       | --         |
| <i>N. jamaicensis</i>                  | Unknown | Pair   | Neotropical | --    | --       | --         |
| <i>N. griseus</i>                      | Pair    | Pair   | Neotropical | --    | --       | --         |
| <i>N. maculosus</i>                    | Unknown | Pair   | Neotropical | --    | --       | --         |
| <i>N. leucopterus</i>                  | Unknown | Pair   | Neotropical | --    | --       | --         |
| <i>N. bracteatus</i>                   | Pair    | Pair   | Neotropical | --    | --       | --         |
| <b>Caprimulgiformes: Caprimulgidae</b> |         |        |             |       |          |            |
| <i>Lurocalis semitorquatus</i>         | Unknown | Pair   | Neotropical | [175] | bbbfbbba | [136, 176] |
| <i>L. rufiventris</i>                  | Unknown | Pair   | Neotropical | --    | --       | --         |
| <i>Chordeiles pusillus</i>             | Unknown | Pair   | Neotropical | --    | --       | --         |
| <i>C. rupestris</i>                    | Pair    | Pair   | Neotropical | --    | --       | --         |
| <i>C. acutipennis</i>                  | Pair    | Pair   | Neotropical | --    | --       | --         |
| <i>C. minor</i>                        | Pair    | Pair   | Widespread  | --    | --       | --         |
| <i>C. gundlachii</i>                   | Pair    | Pair   | Neotropical | --    | --       | --         |
| <i>Nyctiprogne leucopyga</i>           | Unknown | Pair   | Neotropical | --    | --       | --         |
| <i>Podager nacunda</i>                 | Unknown | Pair   | Neotropical | --    | --       | --         |
| <i>Nyctidromus albicollis</i>          | Pair    | Pair   | Neotropical | --    | --       | --         |
| <i>Phalaenoptilus nuttallii</i>        | Pair    | Pair   | Nearctic    | --    | --       | --         |
| <i>Siphonorhis brewsteri</i>           | Unknown | Pair   | Neotropical | --    | --       | --         |
| <i>Nyctiphrynus mcleodii</i>           | Pair    | Pair   | Neotropical | --    | --       | --         |
| <i>N. yucatanicus</i>                  | Unknown | Pair   | Neotropical | --    | --       | --         |
| <i>N. ocellatus</i>                    | Unknown | Pair   | Neotropical | --    | --       | --         |
| <i>Caprimulgus carolinensis</i>        | Pair    | Pair   | Nearctic    | --    | --       | --         |
| <i>C. rufus</i>                        | Unknown | Pair   | Neotropical | --    | --       | --         |
| <i>C. cubanensis</i>                   | Pair    | Pair   | Neotropical | --    | --       | --         |
| <i>C. salvini</i>                      | Unknown | Pair   | Neotropical | --    | --       | --         |
| <i>C. badius</i>                       | Unknown | Pair   | Neotropical | --    | --       | --         |



|                            |            |      |             |    |    |    |
|----------------------------|------------|------|-------------|----|----|----|
| <i>C. sericocaudatus</i>   | Unknown    | Pair | Neotropical | -- | -- | -- |
| <i>C. ridgwayi</i>         | Unknown    | Pair | Neotropical | -- | -- | -- |
| <i>C. vociferus</i>        | Pair       | Pair | Widespread  | -- | -- | -- |
| <i>C. noctitherus</i>      | Pair       | Pair | Neotropical | -- | -- | -- |
| <i>C. saturatus</i>        | Unknown    | Pair | Neotropical | -- | -- | -- |
| <i>C. longirostris</i>     | Unknown    | Pair | Neotropical | -- | -- | -- |
| <i>C. cayennensis</i>      | Pair       | Pair | Neotropical | -- | -- | -- |
| <i>C. candicans</i>        | Unknown    | Pair | Neotropical | -- | -- | -- |
| <i>C. maculicaudus</i>     | Unknown    | Pair | Neotropical | -- | -- | -- |
| <i>C. parvulus</i>         | Unknown    | Pair | Neotropical | -- | -- | -- |
| <i>C. anthonyi</i>         | Unknown    | Pair | Neotropical | -- | -- | -- |
| <i>C. maculosus</i>        | Unknown    | Pair | Neotropical | -- | -- | -- |
| <i>C. nigrescens</i>       | Pair       | Pair | Neotropical | -- | -- | -- |
| <i>C. whitelyi</i>         | Unknown    | Pair | Neotropical | -- | -- | -- |
| <i>C. hirundinaceus</i>    | Unknown    | Pair | Neotropical | -- | -- | -- |
| <i>C. binotatus</i>        | Unknown    | Pair | Africa      | -- | -- | -- |
| <i>C. ruficollis</i>       | Pair       | Pair | Palaearctic | -- | -- | -- |
| <i>C. indicus</i>          | Pair       | Pair | Widespread  | -- | -- | -- |
| <i>C. europaeus</i>        | Occasional | Pair | Palaearctic | -- | -- | -- |
| <i>C. fraenatus</i>        | Unknown    | Pair | Africa      | -- | -- | -- |
| <i>C. rufigena</i>         | Unknown    | Pair | Africa      | -- | -- | -- |
| <i>C. aegyptius</i>        | Pair       | Pair | Palaearctic | -- | -- | -- |
| <i>C. mahrattensis</i>     | Pair       | Pair | Indomalayan | -- | -- | -- |
| <i>C. centralasicus</i>    | Unknown    | Pair | Palaearctic | -- | -- | -- |
| <i>C. nubicus</i>          | Unknown    | Pair | Africa      | -- | -- | -- |
| <i>C. eximius</i>          | Unknown    | Pair | Africa      | -- | -- | -- |
| <i>C. madagascariensis</i> | Unknown    | Pair | Africa      | -- | -- | -- |
| <i>C. macrurus</i>         | Pair       | Pair | Widespread  | -- | -- | -- |
| <i>C. atripennis</i>       | Pair       | Pair | Indomalayan | -- | -- | -- |
| <i>C. manillensis</i>      | Unknown    | Pair | Indomalayan | -- | -- | -- |
| <i>C. celebensis</i>       | Unknown    | Pair | Indomalayan | -- | -- | -- |
| <i>C. donaldsoni</i>       | Unknown    | Pair | Africa      | -- | -- | -- |
| <i>C. nigriscapularis</i>  | Unknown    | Pair | Africa      | -- | -- | -- |
| <i>C. pectoralis</i>       | Pair       | Pair | Africa      | -- | -- | -- |
| <i>C. prigoginei</i>       | Unknown    | Pair | Africa      | -- | -- | -- |
| <i>C. poliocephalus</i>    | Pair       | Pair | Africa      | -- | -- | -- |
| <i>C. ruwenzorii</i>       | Unknown    | Pair | Africa      | -- | -- | -- |
| <i>C. asiaticus</i>        | Pair       | Pair | Indomalayan | -- | -- | -- |
| <i>C. natalensis</i>       | Pair       | Pair | Africa      | -- | -- | -- |
| <i>C. inornatus</i>        | Pair       | Pair | Africa      | -- | -- | -- |
| <i>C. stellatus</i>        | Unknown    | Pair | Africa      | -- | -- | -- |
| <i>C. affinis</i>          | Pair       | Pair | Indomalayan | -- | -- | -- |
| <i>C. tristigma</i>        | Pair       | Pair | Africa      | -- | -- | -- |

|                                         |             |             |             |       |           |            |     |       |
|-----------------------------------------|-------------|-------------|-------------|-------|-----------|------------|-----|-------|
| <i>C. concretus</i>                     | Unknown     | Pair        | Indomalayan | --    | --        | --         |     |       |
| <i>C. pulchellus</i>                    | Unknown     | Pair        | Indomalayan | --    | --        | --         |     |       |
| <i>C. enarratus</i>                     | Unknown     | Pair        | Africa      | --    | --        | --         |     |       |
| <i>C. batesi</i>                        | Unknown     | Pair        | Africa      | --    | --        | --         |     |       |
| <i>C. climacurus</i>                    | Pair        | Pair        | Africa      | --    | --        | --         |     |       |
| <i>C. clarus</i>                        | Pair        | Pair        | Africa      | --    | --        | --         |     |       |
| <i>C. fossii</i>                        | Pair        | Pair        | Africa      | --    | --        | --         |     |       |
| <i>Macrodipteryx longipennis</i>        | Female only | Female only | Africa      | --    | --        | --         |     |       |
| <i>M. vexillarius</i>                   | Unknown     | Female only | Africa      | --    | --        | --         |     |       |
| <i>Hydropsalis climacocerca</i>         | Unknown     | Pair        | Neotropical | --    | --        | --         |     |       |
| <i>H. brasiliana</i>                    | Unknown     | Pair        | Neotropical | --    | --        | --         |     |       |
| <i>Uropsalis segmentata</i>             | Unknown     | Female only | Neotropical | --    | --        | --         |     |       |
| <i>U. lyra</i>                          | Unknown     | Female only | Neotropical | --    | --        | --         |     |       |
| <i>Macropsalis creagra</i>              | Unknown     | Female only | Neotropical | --    | --        | --         |     |       |
| <i>Eleothreptus anomalus</i>            | Unknown     | Female only | Neotropical | --    | --        | --         |     |       |
| <b>Caprimulgiformes: Eurostopodidae</b> |             |             |             |       |           |            |     |       |
| <i>Eurostopodus argus</i>               | Pair        | Pair        | Australia   | [175] | bbbfbbbbb | [136, 176] |     |       |
| <i>E. mystacalis</i>                    | Pair        | Pair        | Australia   | --    | --        | --         |     |       |
| <i>E. diabolicus</i>                    | Unknown     | Pair        | Indomalayan | --    | --        | --         |     |       |
| <i>E. papuensis</i>                     | Unknown     | Pair        | Australia   | --    | --        | --         |     |       |
| <i>E. archboldi</i>                     | Unknown     | Pair        | Australia   | --    | --        | --         |     |       |
| <i>E. temminckii</i>                    | Unknown     | Pair        | Indomalayan | --    | --        | --         |     |       |
| <i>E. macrotis</i>                      | Unknown     | Pair        | Indomalayan | --    | --        | --         |     |       |
| <b>Caprimulgiformes: Aegothelidae</b>   |             |             |             |       |           |            |     |       |
| <i>Aegotheles crinifrons</i>            | Unknown     | Pair        | Australia   | [175] | bbbfbbc   | [136, 176] |     |       |
| <i>A. insignis</i>                      | Unknown     | Pair        | Australia   | --    | --        | --         |     |       |
| <i>A. cristatus</i>                     | Pair        | Pair        | Australia   | --    | --        | --         |     |       |
| <i>A. savesi</i>                        | Unknown     | Pair        | Australia   | --    | --        | --         |     |       |
| <i>A. bennettii</i>                     | Unknown     | Pair        | Australia   | --    | --        | --         |     |       |
| <i>A. wallacii</i>                      | Unknown     | Pair        | Australia   | --    | --        | --         |     |       |
| <i>A. archboldi</i>                     | Unknown     | Pair        | Australia   | --    | --        | --         |     |       |
| <i>A. albertisi</i>                     | Unknown     | Pair        | Australia   | --    | --        | --         |     |       |
| <b>Gruiformes: Otitidae</b>             |             |             |             |       |           |            |     |       |
| <i>Heterotetrax rueppellii</i>          | Group       | Pair        | Africa      | [177] | bbcaa     | [3]        | a   | [178] |
| <i>H. vigorsii</i>                      | Group       | Pair        | Africa      | --    | --        | --         | --  | --    |
| <i>H. humilis</i>                       | Unknown     | Pair        | Africa      | --    | --        | --         | --  | --    |
| <i>Neotis denhami</i>                   | Female only | Female only | Africa      | --    | --        | --         | baa | --    |
| <i>N. ludwigii</i>                      | Female only | Female only | Africa      | --    | --        | --         | --  | --    |
| <i>N. nuba</i>                          | Unknown     | Female only | Africa      | --    | --        | --         | --  | --    |
| <i>N. heuglinii</i>                     | Unknown     | Female only | Africa      | --    | --        | --         | --  | --    |
| <i>Ardeotis arabs</i>                   | Female only | Female only | Africa      | --    | --        | --         | --  | --    |
| <i>A. kori</i>                          | Female only | Female only | Africa      | --    | --        | --         | --  | --    |
| <i>A. nigriceps</i>                     | Female only | Female only | Indomalayan | --    | --        | --         | --  | --    |

|                                   |             |             |             |       |          |     |     |    |
|-----------------------------------|-------------|-------------|-------------|-------|----------|-----|-----|----|
| <i>A. australis</i>               | Female only | Female only | Australia   | --    | --       | --  | --  | -- |
| <i>Lissotis melanogaster</i>      | Female only | Female only | Africa      | --    | --       | --  | bab | -- |
| <i>L. hartlaubii</i>              | Female only | Female only | Africa      | --    | --       | --  | --  | -- |
| <i>Tetrax tetrax</i>              | Female only | Female only | Paelearctic | --    | --       | --  | bba | -- |
| <i>Lophotis savilei</i>           | Female only | Female only | Africa      | --    | --       | --  | --  | -- |
| <i>L. gindiana</i>                | Female only | Female only | Africa      | --    | --       | --  | --  | -- |
| <i>L. ruficrista</i>              | Female only | Female only | Africa      | --    | --       | --  | --  | -- |
| <i>Houbaropsis bengalensis</i>    | Female only | Female only | Paelearctic | --    | --       | --  | --  | -- |
| <i>Sypheotides indica</i>         | Female only | Female only | Paelearctic | --    | --       | --  | --  | -- |
| <i>Otis tarda</i>                 | Female only | Female only | Paelearctic | --    | --       | --  | bbb | -- |
| <i>Chlamydotis undulata</i>       | Female only | Female only | Paelearctic | --    | --       | --  | --  | -- |
| <i>Afrotis afrooides</i>          | Female only | Female only | Africa      | --    | --       | --  | --  | -- |
| <i>A. afra</i>                    | Female only | Female only | Africa      | --    | --       | --  | --  | -- |
| <i>Eupodotis senegalensis</i>     | Group       | Pair        | Africa      | --    | --       | --  | --  | -- |
| <i>E. caerulescens</i>            | Group       | Pair        | Africa      | --    | --       | --  | --  | -- |
| <b>Gruiformes: Gruidae</b>        |             |             |             |       |          |     |     |    |
| <i>Balearica pavonina</i>         | Pair        | Pair        | Africa      | [179] | bbcabaaa | [3] |     |    |
| <i>B. regulorum</i>               | Pair        | Pair        | Africa      | --    | --       | --  |     |    |
| <i>Grus leucogeranus</i>          | Pair        | Pair        | Paelearctic | --    | --       | --  |     |    |
| <i>G. antigone</i>                | Pair        | Pair        | Widespread  | --    | --       | --  |     |    |
| <i>G. rubicunda</i>               | Pair        | Pair        | Australia   | --    | --       | --  |     |    |
| <i>G. vipio</i>                   | Pair        | Pair        | Paelearctic | --    | --       | --  |     |    |
| <i>G. canadensis</i>              | Pair        | Pair        | Nearctic    | --    | --       | --  |     |    |
| <i>G. virgo</i>                   | Pair        | Pair        | Paelearctic | --    | --       | --  |     |    |
| <i>G. paradisea</i>               | Pair        | Pair        | Africa      | --    | --       | --  |     |    |
| <i>G. carunculatus</i>            | Pair        | Pair        | Africa      | --    | --       | --  |     |    |
| <i>G. grus</i>                    | Pair        | Pair        | Paelearctic | --    | --       | --  |     |    |
| <i>G. monacha</i>                 | Pair        | Pair        | Paelearctic | --    | --       | --  |     |    |
| <i>G. americana</i>               | Pair        | Pair        | Paelearctic | --    | --       | --  |     |    |
| <i>G. nigricollis</i>             | Pair        | Pair        | Paelearctic | --    | --       | --  |     |    |
| <i>G. japonensis</i>              | Pair        | Pair        | Paelearctic | --    | --       | --  |     |    |
| <b>Gruiformes: Heliornithidae</b> |             |             |             |       |          |     |     |    |
| <i>Podica senegalensis</i>        | Pair        | Pair        | Africa      | [180] | bbcabaab | [3] |     |    |
| <i>Heliopais personata</i>        | Unknown     | Pair        | Indomalayan | --    | --       | --  |     |    |
| <i>Heliornis fulica</i>           | Pair        | Pair        | Neotropical | --    | --       | --  |     |    |
| <i>Aramus guarauna</i>            | Pair        | Pair        | Neotropical | [181] | --       | --  |     |    |
| <b>Gruiformes: Psophiidae</b>     |             |             |             |       |          |     |     |    |
| <i>Psophia crepitans</i>          | Cooperation | Cooperation | Neotropical | [182] | bbcabab  | [3] |     |    |
| <i>P. leucoptera</i>              | Cooperation | Cooperation | Neotropical | --    | --       | --  |     |    |
| <i>P. viridis</i>                 | Suspected   | Cooperation | Neotropical | --    | --       | --  |     |    |
| <b>Gruiformes: Cariamidae</b>     |             |             |             |       |          |     |     |    |
| <i>Cariama cristata</i>           | Pair        | Pair        | Neotropical | [183] | bbcabb   | [3] |     |    |
| <i>Chunga burmeisteri</i>         | Unknown     | Pair        | Neotropical | --    | --       | --  |     |    |

**Gruiformes: Rallidae**

|                                 |             |             |             |       |      |     |
|---------------------------------|-------------|-------------|-------------|-------|------|-----|
| <i>Sarothrura pulchra</i>       | Pair        | Pair        | Africa      | [184] | bbcb | [3] |
| <i>S. elegans</i>               | Pair        | Pair        | Africa      | --    | --   | --  |
| <i>S. rufa</i>                  | Pair        | Pair        | Africa      | --    | --   | --  |
| <i>S. lugens</i>                | Unknown     | Pair        | Africa      | --    | --   | --  |
| <i>S. boehmi</i>                | Pair        | Pair        | Africa      | --    | --   | --  |
| <i>S. affinis</i>               | Pair        | Pair        | Africa      | --    | --   | --  |
| <i>S. insularis</i>             | Unknown     | Pair        | Africa      | --    | --   | --  |
| <i>S. ayresi</i>                | Pair        | Pair        | Africa      | --    | --   | --  |
| <i>S. watersi</i>               | Unknown     | Pair        | Africa      | --    | --   | --  |
| <i>Himantornis haematopus</i>   | Unknown     | Pair        | Africa      | --    | --   | --  |
| <i>Canirallus oculus</i>        | Unknown     | Pair        | Africa      | --    | --   | --  |
| <i>C. kioloides</i>             | Unknown     | Pair        | Africa      | --    | --   | --  |
| <i>Coturnicops exquisitus</i>   | Unknown     | Pair        | Palaearctic | --    | --   | --  |
| <i>C. noveboracensis</i>        | Pair        | Pair        | Nearctic    | --    | --   | --  |
| <i>C. notatus</i>               | Unknown     | Pair        | Neotropical | --    | --   | --  |
| <i>Micropygia schomburgkii</i>  | Unknown     | Pair        | Neotropical | --    | --   | --  |
| <i>Rallina rubra</i>            | Suspected   | Cooperation | Australia   | --    | --   | --  |
| <i>R. leucospila</i>            | Unknown     | Pair        | Australia   | --    | --   | --  |
| <i>R. forbesi</i>               | Unknown     | Pair        | Australia   | --    | --   | --  |
| <i>R. mayri</i>                 | Unknown     | Pair        | Australia   | --    | --   | --  |
| <i>R. tricolor</i>              | Occasional  | Pair        | Australia   | --    | --   | --  |
| <i>R. canningi</i>              | Unknown     | Pair        | Indomalayan | --    | --   | --  |
| <i>R. fasciata</i>              | Unknown     | Pair        | Indomalayan | --    | --   | --  |
| <i>R. eurizonoides</i>          | Pair        | Pair        | Indomalayan | --    | --   | --  |
| <i>Anurolimnas castaneiceps</i> | Unknown     | Pair        | Neotropical | --    | --   | --  |
| <i>A. viridis</i>               | Unknown     | Pair        | Neotropical | --    | --   | --  |
| <i>A. fasciatus</i>             | Unknown     | Pair        | Neotropical | --    | --   | --  |
| <i>Laterallus melanophaius</i>  | Captivity   | Pair        | Neotropical | --    | --   | --  |
| <i>L. levraudi</i>              | Unknown     | Pair        | Neotropical | --    | --   | --  |
| <i>L. ruber</i>                 | Unknown     | Pair        | Neotropical | --    | --   | --  |
| <i>L. albigularis</i>           | Unknown     | Pair        | Neotropical | --    | --   | --  |
| <i>L. exilis</i>                | Unknown     | Pair        | Neotropical | --    | --   | --  |
| <i>L. jamaicensis</i>           | Pair        | Pair        | Neotropical | --    | --   | --  |
| <i>L. spilonotus</i>            | Pair        | Pair        | Neotropical | --    | --   | --  |
| <i>L. leucopyrrhus</i>          | Captivity   | Pair        | Neotropical | --    | --   | --  |
| <i>L. xenopterus</i>            | Unknown     | Pair        | Neotropical | --    | --   | --  |
| <i>Nesoclopeus woodfordi</i>    | Unknown     | Pair        | Australia   | --    | --   | --  |
| <i>Gallirallus australis</i>    | Captivity   | Pair        | Australia   | --    | --   | --  |
| <i>G. sylvestris</i>            | Cooperation | Cooperation | Australia   | --    | --   | --  |
| <i>G. conditicius</i>           | Subspp      | Subspp      | Unknown     | --    | --   | --  |
| <i>G. okinawae</i>              | Unknown     | Pair        | Indomalayan | --    | --   | --  |
| <i>G. torquatus</i>             | Unknown     | Pair        | Indomalayan | --    | --   | --  |

|                              |             |             |             |    |    |    |
|------------------------------|-------------|-------------|-------------|----|----|----|
| <i>G. insignis</i>           | Unknown     | Pair        | Australia   | -- | -- | -- |
| <i>G. philippensis</i>       | Pair        | Pair        | Australia   | -- | -- | -- |
| <i>G. roviae</i>             | Unknown     | Pair        | Australia   | -- | -- | -- |
| <i>G. owstoni</i>            | Unknown     | Pair        | Australia   | -- | -- | -- |
| <i>G. striatus</i>           | Pair        | Pair        | Indomalayan | -- | -- | -- |
| <i>Rallus longirostris</i>   | Pair        | Pair        | Neotropical | -- | -- | -- |
| <i>R. elegans</i>            | Pair        | Pair        | Nearctic    | -- | -- | -- |
| <i>R. wetmorei</i>           | Unknown     | Pair        | Neotropical | -- | -- | -- |
| <i>R. limicola</i>           | Pair        | Pair        | Nearctic    | -- | -- | -- |
| <i>R. semiplumbeus</i>       | Pair        | Pair        | Neotropical | -- | -- | -- |
| <i>R. antarcticus</i>        | Unknown     | Pair        | Neotropical | -- | -- | -- |
| <i>R. aquaticus</i>          | Pair        | Pair        | Palaearctic | -- | -- | -- |
| <i>R. caerulescens</i>       | Pair        | Pair        | Africa      | -- | -- | -- |
| <i>R. madagascariensis</i>   | Unknown     | Pair        | Africa      | -- | -- | -- |
| <i>Lewinia mirificus</i>     | Unknown     | Pair        | Indomalayan | -- | -- | -- |
| <i>L. pectoralis</i>         | Pair        | Pair        | Australia   | -- | -- | -- |
| <i>L. muelleri</i>           | Unknown     | Pair        | Australia   | -- | -- | -- |
| <i>Dryolimnas cuvieri</i>    | Pair        | Pair        | Africa      | -- | -- | -- |
| <i>Creccopsis egregia</i>    | Pair        | Pair        | Africa      | -- | -- | -- |
| <i>Crex crex</i>             | Pair        | Pair        | Palaearctic | -- | -- | -- |
| <i>Rougetius rougetii</i>    | Suspected   | Cooperation | Africa      | -- | -- | -- |
| <i>Aramidopsis plateni</i>   | Unknown     | Pair        | Australia   | -- | -- | -- |
| <i>Atlantisia rogersi</i>    | Pair        | Pair        | Neotropical | -- | -- | -- |
| <i>Aramides mangle</i>       | Unknown     | Pair        | Neotropical | -- | -- | -- |
| <i>A. axillaris</i>          | Suspected   | Cooperation | Neotropical | -- | -- | -- |
| <i>A. cajanea</i>            | Pair        | Pair        | Neotropical | -- | -- | -- |
| <i>A. wolffi</i>             | Unknown     | Pair        | Neotropical | -- | -- | -- |
| <i>A. ypecaha</i>            | Pair        | Pair        | Neotropical | -- | -- | -- |
| <i>A. saracura</i>           | Unknown     | Pair        | Neotropical | -- | -- | -- |
| <i>A. calopterus</i>         | Unknown     | Pair        | Neotropical | -- | -- | -- |
| <i>Amaurolimnas concolor</i> | Unknown     | Pair        | Neotropical | -- | -- | -- |
| <i>Gymnocrex rosenbergii</i> | Unknown     | Pair        | Australia   | -- | -- | -- |
| <i>G. plumbeiventris</i>     | Unknown     | Pair        | Australia   | -- | -- | -- |
| <i>G. talaudensis</i>        | Unknown     | Pair        | Australia   | -- | -- | -- |
| <i>Amaurornis akool</i>      | Pair        | Pair        | Indomalayan | -- | -- | -- |
| <i>A. olivaceus</i>          | Unknown     | Pair        | Indomalayan | -- | -- | -- |
| <i>A. isabellinus</i>        | Unknown     | Pair        | Australia   | -- | -- | -- |
| <i>A. moluccanus</i>         | Pair        | Pair        | Australia   | -- | -- | -- |
| <i>A. magnirostris</i>       | Unknown     | Pair        | Australia   | -- | -- | -- |
| <i>A. phoenicurus</i>        | Pair        | Pair        | Indomalayan | -- | -- | -- |
| <i>A. flavirostra</i>        | Cooperation | Cooperation | Africa      | -- | -- | -- |
| <i>A. olivieri</i>           | Unknown     | Pair        | Africa      | -- | -- | -- |
| <i>A. bicolor</i>            | Pair        | Pair        | Indomalayan | -- | -- | -- |

[184]

[184]

|                                    |             |             |             |                 |    |    |
|------------------------------------|-------------|-------------|-------------|-----------------|----|----|
| <i>Porzana parva</i>               | Pair        | Pair        | Palaearctic | --              | -- | -- |
| <i>P. pusilla</i>                  | Pair        | Pair        | Widespread  | --              | -- | -- |
| <i>P. porzana</i>                  | Pair        | Pair        | Widespread  | --              | -- | -- |
| <i>P. fluminea</i>                 | Pair        | Pair        | Australia   | --              | -- | -- |
| <i>P. carolina</i>                 | Pair        | Pair        | Nearctic    | --              | -- | -- |
| <i>P. spiloptera</i>               | Unknown     | Pair        | Neotropical | --              | -- | -- |
| <i>P. albicollis</i>               | Unknown     | Pair        | Neotropical | --              | -- | -- |
| <i>P. fusca</i>                    | Pair        | Pair        | Indomalayan | --              | -- | -- |
| <i>P. paykullii</i>                | Pair        | Pair        | Palaearctic | --              | -- | -- |
| <i>P. tabuensis</i>                | Pair        | Pair        | Australia   | --              | -- | -- |
| <i>P. atra</i>                     | Cooperation | Cooperation | Australia   | --              | -- | -- |
| <i>P. flaviventer</i>              | Pair        | Pair        | Neotropical | --              | -- | -- |
| <i>P. cinerea</i>                  | Pair        | Pair        | Australia   | --              | -- | -- |
| <i>Aenigmatolimnas marginalis</i>  | Unknown     | Cooperation | Africa      | --              | -- | -- |
| <i>Cyanolimnas cerverai</i>        | Unknown     | Pair        | Neotropical | --              | -- | -- |
| <i>Neocrex colombianus</i>         | Unknown     | Pair        | Neotropical | --              | -- | -- |
| <i>N. erythrops</i>                | Unknown     | Pair        | Neotropical | --              | -- | -- |
| <i>Pardirallus maculatus</i>       | Unknown     | Pair        | Neotropical | --              | -- | -- |
| <i>P. nigricans</i>                | Unknown     | Pair        | Neotropical | --              | -- | -- |
| <i>P. sanguinolentus</i>           | Unknown     | Pair        | Neotropical | --              | -- | -- |
| <i>Eulabeornis castaneoventris</i> | Pair        | Pair        | Australia   | --              | -- | -- |
| <i>Habroptila wallacii</i>         | Unknown     | Pair        | Australia   | --              | -- | -- |
| <i>Megacrex inepta</i>             | Unknown     | Pair        | Australia   | --              | -- | -- |
| <i>Gallicrex cinerea</i>           | Pair        | Pair        | Indomalayan | --              | -- | -- |
| <i>Porphyrio porphyrio</i>         | Cooperation | Cooperation | Widespread  | --              | -- | -- |
| <i>P. mantelli</i>                 | Cooperation | Cooperation | Australia   | --              | -- | -- |
| <i>P. alleni</i>                   | Pair        | Pair        | Africa      | --              | -- | -- |
| <i>P. martinicus</i>               | Cooperation | Cooperation | Neotropical | --              | -- | -- |
| <i>P. flavirostris</i>             | Pair        | Pair        | Neotropical | --              | -- | -- |
| <i>Gallinula silvestris</i>        | Unknown     | Pair        | Australia   | --              | -- | -- |
| <i>G. nesiotis</i>                 | Cooperation | Cooperation | Africa      | --              | -- | -- |
| <i>G. chloropus</i>                | Cooperation | Cooperation | Widespread  | [184, 185]      | -- | -- |
| <i>G. tenebrosa</i>                | Cooperation | Cooperation | Australia   | [184]           | -- | -- |
| <i>G. angulata</i>                 | Pair        | Pair        | Africa      | --              | -- | -- |
| <i>G. melanops</i>                 | Pair        | Pair        | Neotropical | --              | -- | -- |
| <i>G. ventralis</i>                | Pair        | Pair        | Australia   | --              | -- | -- |
| <i>G. mortierii</i>                | Cooperation | Cooperation | Australia   | --              | -- | -- |
| <i>Fulica cristata</i>             | Cooperation | Cooperation | Africa      | [184, 186]      | -- | -- |
| <i>F. atra</i>                     | Cooperation | Cooperation | Widespread  | [184, 187, 188] | -- | -- |
| <i>F. alai</i>                     | Pair        | Pair        | Neotropical | [184]           | -- | -- |
| <i>F. americana</i>                | Pair        | Pair        | Neotropical | --              | -- | -- |
| <i>F. caribaea</i>                 | Unknown     | Pair        | Neotropical | --              | -- | -- |
| <i>F. leucoptera</i>               | Pair        | Pair        | Neotropical | --              | -- | -- |

|                                                   |             |             |             |            |      |          |
|---------------------------------------------------|-------------|-------------|-------------|------------|------|----------|
| <i>F. ardesiaca</i>                               | Cooperation | Cooperation | Neotropical | --         | --   | --       |
| <i>F. armillata</i>                               | Pair        | Pair        | Neotropical | --         | --   | --       |
| <i>F. rufifrons</i>                               | Pair        | Pair        | Neotropical | --         | --   | --       |
| <i>F. gigantea</i>                                | Cooperation | Cooperation | Neotropical | --         | --   | --       |
| <i>F. cornuta</i>                                 | Pair        | Pair        | Neotropical | --         | --   | --       |
| <b>Gruiformes incertae sedis: Rhynchocetidae</b>  |             |             |             |            |      |          |
| <i>Rhynchocetos jubatus</i>                       | Cooperation | Cooperation | Australia   | [189]      | bbcc | [3, 136] |
| <b>Gruiformes incertae sedis: Eurypygidae</b>     |             |             |             |            |      |          |
| <i>Eurypyga helias</i>                            | Pair        | Pair        | Neotropical | [190]      | bbcd | [3, 136] |
| <b>Gruiformes incertae sedis: Mesitornithidae</b> |             |             |             |            |      |          |
| <i>Mesitornis variegata</i>                       | Unknown     | Cooperation | Africa      | [191]      | bbce | [3, 136] |
| <i>M. unicolor</i>                                | Pair        | Pair        | Africa      | --         | --   | --       |
| <i>Monias benschi</i>                             | Cooperation | Cooperation | Africa      | [191, 192] | --   | --       |
| <b>Columbiformes: Columbidae</b>                  |             |             |             |            |      |          |
| <i>Columba livia</i>                              | Pair        | Pair        | Widespread  | [193-195]  | bbcf | [3, 136] |
| <i>C. rupestris</i>                               | Pair        | Pair        | Palaearctic | [194, 195] | --   | --       |
| <i>C. leuconota</i>                               | Pair        | Pair        | Palaearctic | --         | --   | --       |
| <i>C. guinea</i>                                  | Pair        | Pair        | Africa      | --         | --   | --       |
| <i>C. albitorques</i>                             | Pair        | Pair        | Africa      | --         | --   | --       |
| <i>C. oenas</i>                                   | Pair        | Pair        | Palaearctic | --         | --   | --       |
| <i>C. oliviae</i>                                 | Unknown     | Pair        | Africa      | --         | --   | --       |
| <i>C. eversmanni</i>                              | Pair        | Pair        | Palaearctic | --         | --   | --       |
| <i>C. palumbus</i>                                | Pair        | Pair        | Palaearctic | --         | --   | --       |
| <i>C. trocaz</i>                                  | Pair        | Pair        | Palaearctic | --         | --   | --       |
| <i>C. bollii</i>                                  | Pair        | Pair        | Palaearctic | --         | --   | --       |
| <i>C. junoniae</i>                                | Pair        | Pair        | Palaearctic | --         | --   | --       |
| <i>C. uncinata</i>                                | Unknown     | Pair        | Africa      | --         | --   | --       |
| <i>C. sjostedti</i>                               | Unknown     | Pair        | Africa      | --         | --   | --       |
| <i>C. thomensis</i>                               | Unknown     | Pair        | Africa      | --         | --   | --       |
| <i>C. arquatrix</i>                               | Pair        | Pair        | Africa      | --         | --   | --       |
| <i>C. pollenii</i>                                | Pair        | Pair        | Africa      | --         | --   | --       |
| <i>C. hodgsonii</i>                               | Unknown     | Pair        | Palaearctic | --         | --   | --       |
| <i>C. albinucha</i>                               | Unknown     | Pair        | Africa      | --         | --   | --       |
| <i>C. pulchricollis</i>                           | Pair        | Pair        | Indomalayan | --         | --   | --       |
| <i>C. elphinstonii</i>                            | Unknown     | Pair        | Indomalayan | --         | --   | --       |
| <i>C. torringtoni</i>                             | Unknown     | Pair        | Indomalayan | --         | --   | --       |
| <i>C. punicea</i>                                 | Pair        | Pair        | Indomalayan | --         | --   | --       |
| <i>C. argentina</i>                               | Unknown     | Pair        | Indomalayan | --         | --   | --       |
| <i>C. palumboides</i>                             | Unknown     | Pair        | Indomalayan | --         | --   | --       |
| <i>C. janthina</i>                                | Unknown     | Pair        | Palaearctic | --         | --   | --       |
| <i>C. vitiensis</i>                               | Pair        | Pair        | Widespread  | --         | --   | --       |
| <i>C. leucomela</i>                               | Pair        | Pair        | Australia   | --         | --   | --       |
| <i>C. pallidiceps</i>                             | Unknown     | Pair        | Australia   | --         | --   | --       |

|                            |         |      |             |    |    |    |
|----------------------------|---------|------|-------------|----|----|----|
| <i>C. leucocephala</i>     | Pair    | Pair | Neotropical | -- | -- | -- |
| <i>C. speciosa</i>         | Pair    | Pair | Neotropical | -- | -- | -- |
| <i>C. squamosa</i>         | Unknown | Pair | Neotropical | -- | -- | -- |
| <i>C. corensis</i>         | Pair    | Pair | Neotropical | -- | -- | -- |
| <i>C. picazuro</i>         | Pair    | Pair | Neotropical | -- | -- | -- |
| <i>C. maculosa</i>         | Pair    | Pair | Neotropical | -- | -- | -- |
| <i>C. fasciata</i>         | Pair    | Pair | Widespread  | -- | -- | -- |
| <i>C. araucana</i>         | Pair    | Pair | Neotropical | -- | -- | -- |
| <i>C. caribaea</i>         | Unknown | Pair | Neotropical | -- | -- | -- |
| <i>C. cayennensis</i>      | Pair    | Pair | Neotropical | -- | -- | -- |
| <i>C. flavirostris</i>     | Unknown | Pair | Neotropical | -- | -- | -- |
| <i>C. oenops</i>           | Unknown | Pair | Neotropical | -- | -- | -- |
| <i>C. inornata</i>         | Pair    | Pair | Neotropical | -- | -- | -- |
| <i>C. plumbea</i>          | Unknown | Pair | Neotropical | -- | -- | -- |
| <i>C. subvinacea</i>       | Pair    | Pair | Neotropical | -- | -- | -- |
| <i>C. nigrirostris</i>     | Unknown | Pair | Neotropical | -- | -- | -- |
| <i>C. goodsoni</i>         | Unknown | Pair | Neotropical | -- | -- | -- |
| <i>C. iriditorques</i>     | Unknown | Pair | Africa      | -- | -- | -- |
| <i>C. malherbii</i>        | Unknown | Pair | Africa      | -- | -- | -- |
| <i>C. delegorguei</i>      | Pair    | Pair | Africa      | -- | -- | -- |
| <i>C. picturata</i>        | Pair    | Pair | Africa      | -- | -- | -- |
| <i>C. larvata</i>          | Pair    | Pair | Africa      | -- | -- | -- |
| <i>C. mayeri</i>           | Pair    | Pair | Africa      | -- | -- | -- |
| <i>Streptopelia turtur</i> | Pair    | Pair | Palaearctic | -- | -- | -- |
| <i>S. hypopyrrha</i>       | Pair    | Pair | Africa      | -- | -- | -- |
| <i>S. lugens</i>           | Pair    | Pair | Africa      | -- | -- | -- |
| <i>S. orientalis</i>       | Pair    | Pair | Widespread  | -- | -- | -- |
| <i>S. senegalensis</i>     | Pair    | Pair | Widespread  | -- | -- | -- |
| <i>S. chinensis</i>        | Pair    | Pair | Indomalayan | -- | -- | -- |
| <i>S. decipiens</i>        | Pair    | Pair | Africa      | -- | -- | -- |
| <i>S. vinacea</i>          | Pair    | Pair | Africa      | -- | -- | -- |
| <i>S. capicola</i>         | Pair    | Pair | Africa      | -- | -- | -- |
| <i>S. tranquebarica</i>    | Pair    | Pair | Widespread  | -- | -- | -- |
| <i>S. semitorquata</i>     | Pair    | Pair | Africa      | -- | -- | -- |
| <i>S. decaocto</i>         | Pair    | Pair | Widespread  | -- | -- | -- |
| <i>S. roseoerisea</i>      | Pair    | Pair | Africa      | -- | -- | -- |
| <i>S. reichenowi</i>       | Unknown | Pair | Africa      | -- | -- | -- |
| <i>S. bitorquata</i>       | Pair    | Pair | Indomalayan | -- | -- | -- |
| <i>Macropygia unchall</i>  | Pair    | Pair | Indomalayan | -- | -- | -- |
| <i>M. rufipennis</i>       | Unknown | Pair | Indomalayan | -- | -- | -- |
| <i>M. tenuirostris</i>     | Unknown | Pair | Indomalayan | -- | -- | -- |
| <i>M. emiliana</i>         | Unknown | Pair | Indomalayan | -- | -- | -- |
| <i>M. amboinensis</i>      | Pair    | Pair | Australia   | -- | -- | -- |



|                                  |         |      |             |    |    |    |
|----------------------------------|---------|------|-------------|----|----|----|
| <i>M. magna</i>                  | Unknown | Pair | Australia   | -- | -- | -- |
| <i>M. phasianella</i>            | Pair    | Pair | Australia   | -- | -- | -- |
| <i>M. ruficeps</i>               | Pair    | Pair | Indomalayan | -- | -- | -- |
| <i>M. nigrirostris</i>           | Unknown | Pair | Australia   | -- | -- | -- |
| <i>M. mackinlayi</i>             | Unknown | Pair | Australia   | -- | -- | -- |
| <i>Reinwardtoena reinwardtsi</i> | Pair    | Pair | Australia   | -- | -- | -- |
| <i>R. browni</i>                 | Unknown | Pair | Australia   | -- | -- | -- |
| <i>R. crassirostris</i>          | Pair    | Pair | Australia   | -- | -- | -- |
| <i>Turacoena manadensis</i>      | Unknown | Pair | Indomalayan | -- | -- | -- |
| <i>T. modesta</i>                | Unknown | Pair | Australia   | -- | -- | -- |
| <i>Turtur abyssinicus</i>        | Pair    | Pair | Africa      | -- | -- | -- |
| <i>T. chalcospilos</i>           | Pair    | Pair | Africa      | -- | -- | -- |
| <i>T. afer</i>                   | Pair    | Pair | Africa      | -- | -- | -- |
| <i>T. tympanistria</i>           | Pair    | Pair | Africa      | -- | -- | -- |
| <i>T. brehmeri</i>               | Pair    | Pair | Africa      | -- | -- | -- |
| <i>Oena capensis</i>             | Pair    | Pair | Africa      | -- | -- | -- |
| <i>Chalcophaps indica</i>        | Pair    | Pair | Widespread  | -- | -- | -- |
| <i>C. stephani</i>               | Pair    | Pair | Australia   | -- | -- | -- |
| <i>Henicophaps albifrons</i>     | Unknown | Pair | Australia   | -- | -- | -- |
| <i>H. foersteri</i>              | Unknown | Pair | Australia   | -- | -- | -- |
| <i>Phaps chalcoptera</i>         | Pair    | Pair | Australia   | -- | -- | -- |
| <i>P. elegans</i>                | Pair    | Pair | Australia   | -- | -- | -- |
| <i>P. histrionica</i>            | Pair    | Pair | Australia   | -- | -- | -- |
| <i>Geophaps lophotes</i>         | Pair    | Pair | Australia   | -- | -- | -- |
| <i>G. plumifera</i>              | Pair    | Pair | Australia   | -- | -- | -- |
| <i>G. smithii</i>                | Pair    | Pair | Australia   | -- | -- | -- |
| <i>G. scripta</i>                | Pair    | Pair | Australia   | -- | -- | -- |
| <i>Petrophassa albipennis</i>    | Pair    | Pair | Australia   | -- | -- | -- |
| <i>P. rufipennis</i>             | Pair    | Pair | Australia   | -- | -- | -- |
| <i>Geopelia cuneata</i>          | Pair    | Pair | Australia   | -- | -- | -- |
| <i>G. striata</i>                | Pair    | Pair | Indomalayan | -- | -- | -- |
| <i>G. maugeus</i>                | Unknown | Pair | Australia   | -- | -- | -- |
| <i>G. placida</i>                | Pair    | Pair | Australia   | -- | -- | -- |
| <i>G. humeralis</i>              | Pair    | Pair | Australia   | -- | -- | -- |
| <i>Leucosarcia melanoleuca</i>   | Pair    | Pair | Australia   | -- | -- | -- |
| <i>Zenaida macroura</i>          | Pair    | Pair | Nearctic    | -- | -- | -- |
| <i>Z. graysoni</i>               | Pair    | Pair | Neotropical | -- | -- | -- |
| <i>Z. auriculata</i>             | Pair    | Pair | Neotropical | -- | -- | -- |
| <i>Z. aurita</i>                 | Pair    | Pair | Neotropical | -- | -- | -- |
| <i>Z. asiatica</i>               | Pair    | Pair | Neotropical | -- | -- | -- |
| <i>Z. galapagoensis</i>          | Pair    | Pair | Neotropical | -- | -- | -- |
| <i>Columbina inca</i>            | Pair    | Pair | Neotropical | -- | -- | -- |
| <i>C. squammata</i>              | Pair    | Pair | Neotropical | -- | -- | -- |

|                                |         |      |             |    |    |    |
|--------------------------------|---------|------|-------------|----|----|----|
| <i>C. passerina</i>            | Pair    | Pair | Neotropical | -- | -- | -- |
| <i>C. minuta</i>               | Pair    | Pair | Neotropical | -- | -- | -- |
| <i>C. talpacoti</i>            | Pair    | Pair | Neotropical | -- | -- | -- |
| <i>C. buckleyi</i>             | Pair    | Pair | Neotropical | -- | -- | -- |
| <i>C. picui</i>                | Pair    | Pair | Neotropical | -- | -- | -- |
| <i>C. cruziana</i>             | Pair    | Pair | Neotropical | -- | -- | -- |
| <i>C. cyanopsis</i>            | Unknown | Pair | Neotropical | -- | -- | -- |
| <i>Claravis pretiosa</i>       | Pair    | Pair | Neotropical | -- | -- | -- |
| <i>C. mondetoura</i>           | Unknown | Pair | Neotropical | -- | -- | -- |
| <i>C. godefrida</i>            | Unknown | Pair | Neotropical | -- | -- | -- |
| <i>Metriopelia ceciliae</i>    | Pair    | Pair | Neotropical | -- | -- | -- |
| <i>M. morenoi</i>              | Unknown | Pair | Neotropical | -- | -- | -- |
| <i>M. melanoptera</i>          | Pair    | Pair | Neotropical | -- | -- | -- |
| <i>M. aymara</i>               | Pair    | Pair | Neotropical | -- | -- | -- |
| <i>Uropelia campestris</i>     | Unknown | Pair | Neotropical | -- | -- | -- |
| <i>Leptotila verreauxi</i>     | Pair    | Pair | Neotropical | -- | -- | -- |
| <i>L. megalura</i>             | Pair    | Pair | Neotropical | -- | -- | -- |
| <i>L. plumbeiceps</i>          | Unknown | Pair | Neotropical | -- | -- | -- |
| <i>L. battyi</i>               | Unknown | Pair | Neotropical | -- | -- | -- |
| <i>L. wellsi</i>               | Pair    | Pair | Neotropical | -- | -- | -- |
| <i>L. rufaxilla</i>            | Pair    | Pair | Neotropical | -- | -- | -- |
| <i>L. jamaicensis</i>          | Pair    | Pair | Neotropical | -- | -- | -- |
| <i>L. pallida</i>              | Unknown | Pair | Neotropical | -- | -- | -- |
| <i>L. cassini</i>              | Pair    | Pair | Neotropical | -- | -- | -- |
| <i>L. ochraceiventris</i>      | Pair    | Pair | Neotropical | -- | -- | -- |
| <i>L. conoveri</i>             | Unknown | Pair | Neotropical | -- | -- | -- |
| <i>Geotrygon lawrencii</i>     | Pair    | Pair | Neotropical | -- | -- | -- |
| <i>G. costaricensis</i>        | Unknown | Pair | Neotropical | -- | -- | -- |
| <i>G. saphirina</i>            | Unknown | Pair | Neotropical | -- | -- | -- |
| <i>G. caniceps</i>             | Pair    | Pair | Neotropical | -- | -- | -- |
| <i>G. versicolor</i>           | Pair    | Pair | Neotropical | -- | -- | -- |
| <i>G. veraguensis</i>          | Pair    | Pair | Neotropical | -- | -- | -- |
| <i>G. albifacies</i>           | Pair    | Pair | Neotropical | -- | -- | -- |
| <i>G. chiriquensis</i>         | Unknown | Pair | Neotropical | -- | -- | -- |
| <i>G. goldmani</i>             | Unknown | Pair | Neotropical | -- | -- | -- |
| <i>G. linearis</i>             | Pair    | Pair | Neotropical | -- | -- | -- |
| <i>G. frenata</i>              | Pair    | Pair | Neotropical | -- | -- | -- |
| <i>G. chrysia</i>              | Pair    | Pair | Neotropical | -- | -- | -- |
| <i>G. mystacea</i>             | Pair    | Pair | Neotropical | -- | -- | -- |
| <i>G. violacea</i>             | Pair    | Pair | Neotropical | -- | -- | -- |
| <i>G. montana</i>              | Pair    | Pair | Neotropical | -- | -- | -- |
| <i>Starnoenas cyanocephala</i> | Pair    | Pair | Neotropical | -- | -- | -- |
| <i>Caloenas nicobarica</i>     | Pair    | Pair | Widespread  | -- | -- | -- |

|                              |         |      |             |    |    |    |
|------------------------------|---------|------|-------------|----|----|----|
| <i>Gallicolumba luzonica</i> | Pair    | Pair | Indomalayan | -- | -- | -- |
| <i>G. platenae</i>           | Unknown | Pair | Indomalayan | -- | -- | -- |
| <i>G. keayi</i>              | Unknown | Pair | Indomalayan | -- | -- | -- |
| <i>G. criniger</i>           | Unknown | Pair | Indomalayan | -- | -- | -- |
| <i>G. menagei</i>            | Unknown | Pair | Indomalayan | -- | -- | -- |
| <i>G. rufigula</i>           | Pair    | Pair | Australia   | -- | -- | -- |
| <i>G. tristigmata</i>        | Unknown | Pair | Indomalayan | -- | -- | -- |
| <i>G. jobiensis</i>          | Unknown | Pair | Australia   | -- | -- | -- |
| <i>G. kubaryi</i>            | Unknown | Pair | Australia   | -- | -- | -- |
| <i>G. erythroptera</i>       | Unknown | Pair | Australia   | -- | -- | -- |
| <i>G. xanthonura</i>         | Unknown | Pair | Australia   | -- | -- | -- |
| <i>G. stairi</i>             | Unknown | Pair | Australia   | -- | -- | -- |
| <i>G. sanctaecrucis</i>      | Unknown | Pair | Australia   | -- | -- | -- |
| <i>G. salamonis</i>          | Unknown | Pair | Australia   | -- | -- | -- |
| <i>G. rubescens</i>          | Unknown | Pair | Australia   | -- | -- | -- |
| <i>G. beccarii</i>           | Unknown | Pair | Australia   | -- | -- | -- |
| <i>G. canifrons</i>          | Unknown | Pair | Australia   | -- | -- | -- |
| <i>G. hoedtii</i>            | Unknown | Pair | Australia   | -- | -- | -- |
| <i>Trugon terrestris</i>     | Pair    | Pair | Australia   | -- | -- | -- |
| <i>Microgoura meeki</i>      | Unknown | Pair | Australia   | -- | -- | -- |
| <i>Otidiphaps nobilis</i>    | Pair    | Pair | Australia   | -- | -- | -- |
| <i>Phapitreron leucotis</i>  | Unknown | Pair | Indomalayan | -- | -- | -- |
| <i>P. amethystina</i>        | Unknown | Pair | Indomalayan | -- | -- | -- |
| <i>P. cinereiceps</i>        | Unknown | Pair | Indomalayan | -- | -- | -- |
| <i>Treron fulvicollis</i>    | Pair    | Pair | Indomalayan | -- | -- | -- |
| <i>T. olax</i>               | Pair    | Pair | Indomalayan | -- | -- | -- |
| <i>T. vernans</i>            | Pair    | Pair | Indomalayan | -- | -- | -- |
| <i>T. bicincta</i>           | Pair    | Pair | Indomalayan | -- | -- | -- |
| <i>T. pompadora</i>          | Pair    | Pair | Indomalayan | -- | -- | -- |
| <i>T. curvirostra</i>        | Pair    | Pair | Indomalayan | -- | -- | -- |
| <i>T. griseicauda</i>        | Unknown | Pair | Indomalayan | -- | -- | -- |
| <i>T. floris</i>             | Unknown | Pair | Indomalayan | -- | -- | -- |
| <i>T. teysmannii</i>         | Unknown | Pair | Indomalayan | -- | -- | -- |
| <i>T. psittacea</i>          | Unknown | Pair | Indomalayan | -- | -- | -- |
| <i>T. capellei</i>           | Unknown | Pair | Indomalayan | -- | -- | -- |
| <i>T. phoenicoptera</i>      | Pair    | Pair | Indomalayan | -- | -- | -- |
| <i>T. waalia</i>             | Pair    | Pair | Africa      | -- | -- | -- |
| <i>T. calva</i>              | Pair    | Pair | Africa      | -- | -- | -- |
| <i>T. sanctithomae</i>       | Unknown | Pair | Africa      | -- | -- | -- |
| <i>T. pambaensis</i>         | Pair    | Pair | Africa      | -- | -- | -- |
| <i>T. australis</i>          | Unknown | Pair | Africa      | -- | -- | -- |
| <i>T. apicauda</i>           | Pair    | Pair | Indomalayan | -- | -- | -- |
| <i>T. oxyura</i>             | Unknown | Pair | Indomalayan | -- | -- | -- |

|                              |         |      |             |    |    |    |
|------------------------------|---------|------|-------------|----|----|----|
| <i>T. seimundi</i>           | Unknown | Pair | Indomalayan | -- | -- | -- |
| <i>T. sphenura</i>           | Pair    | Pair | Indomalayan | -- | -- | -- |
| <i>T. sieboldii</i>          | Pair    | Pair | Paelearctic | -- | -- | -- |
| <i>T. formosae</i>           | Unknown | Pair | Paelearctic | -- | -- | -- |
| <i>Ptilinopus porphyreus</i> | Pair    | Pair | Indomalayan | -- | -- | -- |
| <i>P. cinctus</i>            | Unknown | Pair | Indomalayan | -- | -- | -- |
| <i>P. dohertyi</i>           | Unknown | Pair | Indomalayan | -- | -- | -- |
| <i>P. alligator</i>          | Pair    | Pair | Australia   | -- | -- | -- |
| <i>P. marcheii</i>           | Unknown | Pair | Indomalayan | -- | -- | -- |
| <i>P. merrilli</i>           | Unknown | Pair | Indomalayan | -- | -- | -- |
| <i>P. occipitalis</i>        | Unknown | Pair | Indomalayan | -- | -- | -- |
| <i>P. fischeri</i>           | Unknown | Pair | Indomalayan | -- | -- | -- |
| <i>P. jambu</i>              | Pair    | Pair | Indomalayan | -- | -- | -- |
| <i>P. leclancheri</i>        | Unknown | Pair | Indomalayan | -- | -- | -- |
| <i>P. subgularis</i>         | Unknown | Pair | Indomalayan | -- | -- | -- |
| <i>P. bernsteinii</i>        | Pair    | Pair | Australia   | -- | -- | -- |
| <i>P. magnificus</i>         | Pair    | Pair | Australia   | -- | -- | -- |
| <i>P. perlatus</i>           | Unknown | Pair | Australia   | -- | -- | -- |
| <i>P. ornatus</i>            | Unknown | Pair | Australia   | -- | -- | -- |
| <i>P. tannensis</i>          | Pair    | Pair | Australia   | -- | -- | -- |
| <i>P. aurantiifrons</i>      | Pair    | Pair | Australia   | -- | -- | -- |
| <i>P. wallacii</i>           | Unknown | Pair | Australia   | -- | -- | -- |
| <i>P. superbus</i>           | Pair    | Pair | Australia   | -- | -- | -- |
| <i>P. perousii</i>           | Pair    | Pair | Australia   | -- | -- | -- |
| <i>P. monacha</i>            | Unknown | Pair | Australia   | -- | -- | -- |
| <i>P. coronulatus</i>        | Pair    | Pair | Australia   | -- | -- | -- |
| <i>P. pulchellus</i>         | Unknown | Pair | Australia   | -- | -- | -- |
| <i>P. regina</i>             | Pair    | Pair | Australia   | -- | -- | -- |
| <i>P. roseicapilla</i>       | Unknown | Pair | Australia   | -- | -- | -- |
| <i>P. greyii</i>             | Pair    | Pair | Australia   | -- | -- | -- |
| <i>P. richardsii</i>         | Unknown | Pair | Australia   | -- | -- | -- |
| <i>P. porphyraceus</i>       | Unknown | Pair | Australia   | -- | -- | -- |
| <i>P. pelewensis</i>         | Pair    | Pair | Australia   | -- | -- | -- |
| <i>P. rarotongensis</i>      | Unknown | Pair | Australia   | -- | -- | -- |
| <i>P. huttoni</i>            | Unknown | Pair | Australia   | -- | -- | -- |
| <i>P. purpuratus</i>         | Pair    | Pair | Australia   | -- | -- | -- |
| <i>P. coralensis</i>         | Unknown | Pair | Australia   | -- | -- | -- |
| <i>P. chalcurus</i>          | Unknown | Pair | Australia   | -- | -- | -- |
| <i>P. insularis</i>          | Unknown | Pair | Australia   | -- | -- | -- |
| <i>P. dupetithouarsii</i>    | Unknown | Pair | Australia   | -- | -- | -- |
| <i>P. rivoli</i>             | Pair    | Pair | Australia   | -- | -- | -- |
| <i>P. solomonensis</i>       | Pair    | Pair | Australia   | -- | -- | -- |
| <i>P. viridis</i>            | Unknown | Pair | Australia   | -- | -- | -- |

|                                     |             |             |             |                 |    |    |
|-------------------------------------|-------------|-------------|-------------|-----------------|----|----|
| <i>P. eugeniae</i>                  | Unknown     | Pair        | Australia   | --              | -- | -- |
| <i>P. hyogastra</i>                 | Unknown     | Pair        | Australia   | --              | -- | -- |
| <i>P. granulifrons</i>              | Unknown     | Pair        | Australia   | --              | -- | -- |
| <i>P. iozonus</i>                   | Unknown     | Pair        | Australia   | --              | -- | -- |
| <i>P. insolitus</i>                 | Pair        | Pair        | Australia   | --              | -- | -- |
| <i>P. nanus</i>                     | Pair        | Pair        | Australia   | --              | -- | -- |
| <i>P. melanospila</i>               | Pair        | Pair        | Indomalayan | --              | -- | -- |
| <i>P. arcanus</i>                   | Unknown     | Pair        | Indomalayan | --              | -- | -- |
| <i>P. victor</i>                    | Female only | Female only | Australia   | [194-196]       | -- | -- |
| <i>P. luteovirens</i>               | Unknown     | Female only | Australia   | [194, 195]      | -- | -- |
| <i>P. layardi</i>                   | Female only | Female only | Australia   | [194, 195, 197] | -- | -- |
| <i>Drepanoptila holosericea</i>     | Female only | Female only | Australia   | [194, 195]      | -- | -- |
| <i>Alectroenas madagascariensis</i> | Unknown     | Pair        | Africa      | --              | -- | -- |
| <i>A. sganzini</i>                  | Unknown     | Pair        | Africa      | --              | -- | -- |
| <i>A. pulcherrima</i>               | Pair        | Pair        | Africa      | --              | -- | -- |
| <i>Ducula poliocephala</i>          | Unknown     | Pair        | Indomalayan | --              | -- | -- |
| <i>D. forsteni</i>                  | Unknown     | Pair        | Indomalayan | --              | -- | -- |
| <i>D. mindorensis</i>               | Unknown     | Pair        | Indomalayan | --              | -- | -- |
| <i>D. radiata</i>                   | Unknown     | Pair        | Indomalayan | --              | -- | -- |
| <i>D. carola</i>                    | Unknown     | Pair        | Indomalayan | --              | -- | -- |
| <i>D. aenea</i>                     | Pair        | Pair        | Indomalayan | --              | -- | -- |
| <i>D. perspicillata</i>             | Unknown     | Pair        | Australia   | --              | -- | -- |
| <i>D. concinna</i>                  | Unknown     | Pair        | Australia   | --              | -- | -- |
| <i>D. pacifica</i>                  | Pair        | Pair        | Australia   | --              | -- | -- |
| <i>D. oceanica</i>                  | Unknown     | Pair        | Australia   | --              | -- | -- |
| <i>D. aurorae</i>                   | Unknown     | Pair        | Australia   | --              | -- | -- |
| <i>D. galeata</i>                   | Unknown     | Pair        | Australia   | --              | -- | -- |
| <i>D. rubricera</i>                 | Unknown     | Pair        | Australia   | --              | -- | -- |
| <i>D. myristicivora</i>             | Unknown     | Pair        | Australia   | --              | -- | -- |
| <i>D. pistrinaria</i>               | Pair        | Pair        | Australia   | --              | -- | -- |
| <i>D. whartoni</i>                  | Pair        | Pair        | Indomalayan | --              | -- | -- |
| <i>D. rosacea</i>                   | Unknown     | Pair        | Indomalayan | --              | -- | -- |
| <i>D. pickeringii</i>               | Unknown     | Pair        | Indomalayan | --              | -- | -- |
| <i>D. basilica</i>                  | Unknown     | Pair        | Australia   | --              | -- | -- |
| <i>D. rufigaster</i>                | Unknown     | Pair        | Australia   | --              | -- | -- |
| <i>D. finschii</i>                  | Unknown     | Pair        | Australia   | --              | -- | -- |
| <i>D. chalconota</i>                | Unknown     | Pair        | Australia   | --              | -- | -- |
| <i>D. latrans</i>                   | Unknown     | Pair        | Australia   | --              | -- | -- |
| <i>D. brenchleyi</i>                | Unknown     | Pair        | Australia   | --              | -- | -- |
| <i>D. bakeri</i>                    | Unknown     | Pair        | Australia   | --              | -- | -- |
| <i>D. goliath</i>                   | Pair        | Pair        | Australia   | --              | -- | -- |
| <i>D. pinon</i>                     | Unknown     | Pair        | Australia   | --              | -- | -- |
| <i>D. melanothroa</i>               | Unknown     | Pair        | Australia   | --              | -- | -- |

|                                  |         |        |             |    |    |    |
|----------------------------------|---------|--------|-------------|----|----|----|
| <i>D. mullerii</i>               | Unknown | Pair   | Australia   | -- | -- | -- |
| <i>D. zoeae</i>                  | Unknown | Pair   | Australia   | -- | -- | -- |
| <i>D. badia</i>                  | Pair    | Pair   | Indomalayan | -- | -- | -- |
| <i>D. lacernulata</i>            | Unknown | Pair   | Indomalayan | -- | -- | -- |
| <i>D. cineracea</i>              | Unknown | Pair   | Indomalayan | -- | -- | -- |
| <i>D. bicolor</i>                | Pair    | Pair   | Indomalayan | -- | -- | -- |
| <i>D. luctuosa</i>               | Unknown | Pair   | Indomalayan | -- | -- | -- |
| <i>D. spilorrhoea</i>            | Pair    | Pair   | Australia   | -- | -- | -- |
| <i>D. constans</i>               | Subspp  | Subspp | Australia   | -- | -- | -- |
| <i>D. subflavescens</i>          | Unknown | Pair   | Australia   | -- | -- | -- |
| <i>Lopholaimus antarcticus</i>   | Pair    | Pair   | Australia   | -- | -- | -- |
| <i>Hemiphaga novaeseelandiae</i> | Pair    | Pair   | Australia   | -- | -- | -- |
| <i>Cryptophaps poecilorrhoea</i> | Unknown | Pair   | Indomalayan | -- | -- | -- |
| <i>Gymnophaps albertisii</i>     | Unknown | Pair   | Australia   | -- | -- | -- |
| <i>G. mada</i>                   | Unknown | Pair   | Australia   | -- | -- | -- |
| <i>G. solomonensis</i>           | Unknown | Pair   | Australia   | -- | -- | -- |
| <i>Goura cristata</i>            | Pair    | Pair   | Australia   | -- | -- | -- |
| <i>G. victoria</i>               | Pair    | Pair   | Australia   | -- | -- | -- |
| <i>G. scheepmakeri</i>           | Unknown | Pair   | Australia   | -- | -- | -- |
| <i>Didunculus strigirostris</i>  | Unknown | Pair   | Australia   | -- | -- | -- |

**Pteroclididae: Pteroclididae**

|                             |         |      |             |      |      |                |
|-----------------------------|---------|------|-------------|------|------|----------------|
| <i>Syrnhaptes tibetanus</i> | Pair    | Pair | Indomalayan | [15] | bbcg | [136, 198-200] |
| <i>S. paradoxus</i>         | Pair    | Pair | Palaearctic | --   | --   | --             |
| <i>Pterocles alchata</i>    | Pair    | Pair | Palaearctic | --   | --   | --             |
| <i>P. namaqua</i>           | Pair    | Pair | Africa      | --   | --   | --             |
| <i>P. exustus</i>           | Pair    | Pair | Widespread  | --   | --   | --             |
| <i>P. senegallus</i>        | Pair    | Pair | Palaearctic | --   | --   | --             |
| <i>P. gutturalis</i>        | Pair    | Pair | Africa      | --   | --   | --             |
| <i>P. orientalis</i>        | Pair    | Pair | Palaearctic | --   | --   | --             |
| <i>P. coronatus</i>         | Pair    | Pair | Palaearctic | --   | --   | --             |
| <i>P. personatus</i>        | Pair    | Pair | Africa      | --   | --   | --             |
| <i>P. decoratus</i>         | Unknown | Pair | Africa      | --   | --   | --             |
| <i>P. bicinctus</i>         | Pair    | Pair | Africa      | --   | --   | --             |
| <i>P. quadricinctus</i>     | Unknown | Pair | Africa      | --   | --   | --             |
| <i>P. indicus</i>           | Pair    | Pair | Indomalayan | --   | --   | --             |
| <i>P. lichtensteinii</i>    | Pair    | Pair | Widespread  | --   | --   | --             |
| <i>P. burchelli</i>         | Pair    | Pair | Africa      | --   | --   | --             |

**Charadrii: Scolopacidae**

|                             |         |      |             |       |          |           |    |       |
|-----------------------------|---------|------|-------------|-------|----------|-----------|----|-------|
| <i>Bartramia longicauda</i> | Pair    | Pair | Nearctic    | [201] | bbdaaaaa | [198-200] | aa | [202] |
| <i>Numenius minutus</i>     | Pair    | Pair | Palaearctic | --    | --       | --        | ab | --    |
| <i>N. borealis</i>          | Unknown | Pair | Nearctic    | --    | --       | --        | -- | --    |
| <i>N. phaeopus</i>          | Pair    | Pair | Widespread  | --    | --       | --        | -- | --    |
| <i>N. tahitiensis</i>       | Pair    | Pair | Nearctic    | --    | --       | --        | -- | --    |

|                              |             |             |             |            |    |    |         |    |
|------------------------------|-------------|-------------|-------------|------------|----|----|---------|----|
| <i>N. tenuirostris</i>       | Unknown     | Pair        | Palearctic  | --         | -- | -- | --      | -- |
| <i>N. arquata</i>            | Pair        | Pair        | Palearctic  | --         | -- | -- | --      | -- |
| <i>N. americanus</i>         | Pair        | Pair        | Nearctic    | --         | -- | -- | --      | -- |
| <i>N. madagascariensis</i>   | Pair        | Pair        | Palearctic  | --         | -- | -- | --      | -- |
| <i>Limosa limosa</i>         | Pair        | Pair        | Palearctic  | --         | -- | -- | ba      | -- |
| <i>L. haemastica</i>         | Pair        | Pair        | Nearctic    | --         | -- | -- | --      | -- |
| <i>L. lapponica</i>          | Pair        | Pair        | Palearctic  | [201, 203] | -- | -- | --      | -- |
| <i>L. fedoa</i>              | Pair        | Pair        | Nearctic    | [201]      | -- | -- | --      | -- |
| <i>Limnodromus griseus</i>   | Pair        | Pair        | Nearctic    | --         | -- | -- | baaa    | -- |
| <i>L. scolopaceus</i>        | Pair        | Pair        | Holarctic   | --         | -- | -- | --      | -- |
| <i>L. semipalmatus</i>       | Pair        | Pair        | Palearctic  | --         | -- | -- | --      | -- |
| <i>Coenocorypha pusilla</i>  | Pair        | Pair        | Australia   | --         | -- | -- | bbaba   | -- |
| <i>C. aucklandica</i>        | Pair        | Pair        | Australia   | --         | -- | -- | --      | -- |
| <i>Lymnocyrtus minimus</i>   | Pair        | Pair        | Palearctic  | --         | -- | -- | bbabba  | -- |
| <i>Scolopax rusticola</i>    | Pair        | Pair        | Palearctic  | --         | -- | -- | bbabbbb | -- |
| <i>S. mira</i>               | Unknown     | Pair        | Palearctic  | --         | -- | -- | --      | -- |
| <i>S. saturata</i>           | Unknown     | Pair        | Australia   | --         | -- | -- | --      | -- |
| <i>S. celebensis</i>         | Unknown     | Pair        | Indomalayan | --         | -- | -- | --      | -- |
| <i>S. rochussenii</i>        | Unknown     | Pair        | Australia   | --         | -- | -- | --      | -- |
| <i>S. minor</i>              | Pair        | Pair        | Nearctic    | --         | -- | -- | --      | -- |
| <i>Gallinago solitaria</i>   | Unknown     | Pair        | Palearctic  | --         | -- | -- | bbabbbb | -- |
| <i>G. hardwickii</i>         | Pair        | Pair        | Palearctic  | --         | -- | -- | --      | -- |
| <i>G. nemoricola</i>         | Unknown     | Pair        | Indomalayan | --         | -- | -- | --      | -- |
| <i>G. stenura</i>            | Pair        | Pair        | Palearctic  | --         | -- | -- | --      | -- |
| <i>G. megala</i>             | Pair        | Pair        | Palearctic  | --         | -- | -- | --      | -- |
| <i>G. media</i>              | Female only | Female only | Palearctic  | --         | -- | -- | --      | -- |
| <i>G. gallinago</i>          | Pair        | Pair        | Widespread  | --         | -- | -- | --      | -- |
| <i>G. nigripennis</i>        | Pair        | Pair        | Africa      | --         | -- | -- | --      | -- |
| <i>G. macrodactyla</i>       | Unknown     | Pair        | Africa      | --         | -- | -- | --      | -- |
| <i>G. paraguaiae</i>         | Unknown     | Pair        | Neotropical | --         | -- | -- | --      | -- |
| <i>G. andina</i>             | Subspp      | Subspp      | Neotropical | --         | -- | -- | --      | -- |
| <i>G. nobilis</i>            | Unknown     | Pair        | Neotropical | --         | -- | -- | --      | -- |
| <i>G. undulata</i>           | Unknown     | Pair        | Neotropical | --         | -- | -- | --      | -- |
| <i>G. jamesoni</i>           | Unknown     | Pair        | Neotropical | --         | -- | -- | --      | -- |
| <i>G. stricklandii</i>       | Unknown     | Pair        | Neotropical | --         | -- | -- | --      | -- |
| <i>G. imperialis</i>         | Unknown     | Pair        | Neotropical | --         | -- | -- | --      | -- |
| <i>Aphriza virgata</i>       | Pair        | Pair        | Nearctic    | --         | -- | -- | bbbaa   | -- |
| <i>Calidris tenuirostris</i> | Pair        | Pair        | Palearctic  | --         | -- | -- | --      | -- |
| <i>C. canutus</i>            | Pair        | Pair        | Holarctic   | --         | -- | -- | --      | -- |
| <i>C. alba</i>               | Pair        | Pair        | Holarctic   | --         | -- | -- | --      | -- |
| <i>C. pusilla</i>            | Pair        | Pair        | Nearctic    | --         | -- | -- | --      | -- |
| <i>C. mauri</i>              | Pair        | Pair        | Holarctic   | --         | -- | -- | --      | -- |
| <i>C. minuta</i>             | Pair        | Pair        | Palearctic  | --         | -- | -- | --      | -- |

|                                    |             |             |             |       |            |           |        |       |
|------------------------------------|-------------|-------------|-------------|-------|------------|-----------|--------|-------|
| <i>C. ruficollis</i>               | Pair        | Pair        | Palaearctic | --    | --         | --        | --     | --    |
| <i>C. temminckii</i>               | Pair        | Pair        | Palaearctic | --    | --         | --        | --     | --    |
| <i>C. subminuta</i>                | Pair        | Pair        | Palaearctic | --    | --         | --        | --     | --    |
| <i>C. minutilla</i>                | Pair        | Pair        | Nearctic    | --    | --         | --        | --     | --    |
| <i>C. fuscicollis</i>              | Female only | Female only | Nearctic    | --    | --         | --        | --     | --    |
| <i>C. bairdii</i>                  | Pair        | Pair        | Holarctic   | --    | --         | --        | --     | --    |
| <i>C. melanotos</i>                | Female only | Female only | Holarctic   | --    | --         | --        | --     | --    |
| <i>C. acuminata</i>                | Female only | Female only | Palaearctic | --    | --         | --        | --     | --    |
| <i>C. maritima</i>                 | Pair        | Pair        | Holarctic   | --    | --         | --        | --     | --    |
| <i>C. ptilocnemis</i>              | Pair        | Pair        | Holarctic   | --    | --         | --        | --     | --    |
| <i>C. alpina</i>                   | Pair        | Pair        | Holarctic   | --    | --         | --        | --     | --    |
| <i>C. ferruginea</i>               | Female only | Female only | Palaearctic | --    | --         | --        | --     | --    |
| <i>Micropalama himantopus</i>      | Pair        | Pair        | Nearctic    | --    | --         | --        | --     | --    |
| <i>Tryngites subruficollis</i>     | Female only | Female only | Nearctic    | --    | --         | --        | --     | --    |
| <i>Eurynorhynchus pygmeus</i>      | Pair        | Pair        | Palaearctic | --    | --         | --        | --     | --    |
| <i>Limicola falcinellus</i>        | Pair        | Pair        | Palaearctic | --    | --         | --        | --     | --    |
| <i>Philomachus pugnax</i>          | Female only | Female only | Palaearctic | --    | --         | --        | --     | --    |
| <i>Arenaria interpres</i>          | Pair        | Pair        | Holarctic   | --    | --         | --        | bbbab  | --    |
| <i>A. melanocephala</i>            | Pair        | Pair        | Nearctic    | --    | --         | --        | --     | --    |
| <i>Tringa erythropus</i>           | Male only   | Male only   | Palaearctic | --    | --         | --        | bbbba  | --    |
| <i>T. totanus</i>                  | Pair        | Pair        | Palaearctic | --    | --         | --        | --     | --    |
| <i>T. stagnatilis</i>              | Pair        | Pair        | Palaearctic | --    | --         | --        | --     | --    |
| <i>T. nebularia</i>                | Pair        | Pair        | Palaearctic | --    | --         | --        | --     | --    |
| <i>T. guttifer</i>                 | Pair        | Pair        | Palaearctic | --    | --         | --        | --     | --    |
| <i>T. melanoleuca</i>              | Pair        | Pair        | Nearctic    | --    | --         | --        | --     | --    |
| <i>T. flavipes</i>                 | Pair        | Pair        | Nearctic    | --    | --         | --        | --     | --    |
| <i>T. solitaria</i>                | Pair        | Pair        | Nearctic    | --    | --         | --        | --     | --    |
| <i>T. ochropus</i>                 | Pair        | Pair        | Palaearctic | --    | --         | --        | --     | --    |
| <i>T. glareola</i>                 | Pair        | Pair        | Palaearctic | --    | --         | --        | --     | --    |
| <i>T. brevipes</i>                 | Pair        | Pair        | Palaearctic | --    | --         | --        | --     | --    |
| <i>T. incana</i>                   | Pair        | Pair        | Holarctic   | --    | --         | --        | --     | --    |
| <i>Catoptrophorus semipalmatus</i> | Pair        | Pair        | Nearctic    | --    | --         | --        | --     | --    |
| <i>Steganopus tricolor</i>         | Male only   | Male only   | Nearctic    | --    | --         | --        | bbbbba | --    |
| <i>Phalaropus lobatus</i>          | Male only   | Male only   | Holarctic   | --    | --         | --        | --     | --    |
| <i>P. fulicaria</i>                | Male only   | Male only   | Holarctic   | --    | --         | --        | --     | --    |
| <i>Prosobonia cancellata</i>       | Unknown     | Pair        | Australia   | --    | --         | --        | bbbbbb | --    |
| <i>Tringa hypoleucos</i>           | Pair        | Pair        | Palaearctic | --    | --         | --        | bbbd   | --    |
| <i>T. macularia</i>                | Male only   | Male only   | Nearctic    | --    | --         | --        | --     | --    |
| <i>T. cinerea</i>                  | Pair        | Pair        | Palaearctic | --    | --         | --        | bbbe   | --    |
| <b>Charadrii: Jacanidae</b>        |             |             |             |       |            |           |        |       |
| <i>Microparra capensis</i>         | Pair        | Pair        | Africa      | [204] | bbdaaaabaa | [198-200] | aaaa   | [205] |
| <i>Irediparra gallinacea</i>       | Male only   | Male only   | Africa      | --    | --         | --        | aaab   | --    |
| <i>Metopidius indicus</i>          | Male only   | Male only   | Indomalayan | --    | --         | --        | aab    | --    |



|                                 |             |             |             |       |              |           |    |    |  |
|---------------------------------|-------------|-------------|-------------|-------|--------------|-----------|----|----|--|
| <i>Actophilornis africanus</i>  | Male only   | Male only   | Africa      | --    | --           | --        | ab | -- |  |
| <i>A. albinucha</i>             | Unknown     | Male only   | Africa      | --    | --           | --        | -- | -- |  |
| <i>Jacana spinosa</i>           | Male only   | Male only   | Neotropical | --    | --           | --        | ba | -- |  |
| <i>J. jacana</i>                | Male only   | Male only   | Neotropical | --    | --           | --        | -- | -- |  |
| <i>Hydrophasianus chirurgus</i> | Male only   | Male only   | Indomalayan | --    | --           | --        | bb | -- |  |
| <b>Charadrii: Rostratulidae</b> |             |             |             |       |              |           |    |    |  |
| <i>Rostratula benghalensis</i>  | Male only   | Male only   | Widespread  | [206] | bbdaaaabab   | [198-200] |    |    |  |
| <i>R. semicollaris</i>          | Pair        | Pair        | Neotropical | --    | --           | --        |    |    |  |
| <b>Charadrii: Thinocoridae</b>  |             |             |             |       |              |           |    |    |  |
| <i>Attagis gayi</i>             | Female only | Female only | Neotropical | [207] | bbdaaaabba   | [198-200] | a  |    |  |
| <i>A. malouinus</i>             | Female only | Female only | Neotropical | --    | --           | --        | -- |    |  |
| <i>Thinocorus orbignyianus</i>  | Female only | Female only | Neotropical | --    | --           | --        | b  |    |  |
| <i>T. rumicivorus</i>           | Female only | Female only | Neotropical | --    | --           | --        | -- |    |  |
| <b>Charadrii: Pedionomidae</b>  |             |             |             |       |              |           |    |    |  |
| <i>Pedionomus torquatus</i>     | Male only   | Male only   | Australia   | [15]  | bbdaaaabbb   | [198-200] |    |    |  |
| <b>Charadrii: Laridae</b>       |             |             |             |       |              |           |    |    |  |
| <i>Larus scoresbii</i>          | Pair        | Pair        | Neotropical | [208] | bbdaaaabaaaa | [198-200] |    |    |  |
| <i>L. pacificus</i>             | Pair        | Pair        | Australia   | --    | --           | --        |    |    |  |
| <i>L. belcheri</i>              | Pair        | Pair        | Neotropical | --    | --           | --        |    |    |  |
| <i>L. atlanticus</i>            | Pair        | Pair        | Neotropical | --    | --           | --        |    |    |  |
| <i>L. crassirostris</i>         | Pair        | Pair        | Paleartic   | --    | --           | --        |    |    |  |
| <i>L. modestus</i>              | Pair        | Pair        | Neotropical | --    | --           | --        |    |    |  |
| <i>L. heermanni</i>             | Pair        | Pair        | Nearctic    | --    | --           | --        |    |    |  |
| <i>L. leucophthalmus</i>        | Pair        | Pair        | Africa      | --    | --           | --        |    |    |  |
| <i>L. hemprichii</i>            | Pair        | Pair        | Africa      | --    | --           | --        |    |    |  |
| <i>L. canus</i>                 | Pair        | Pair        | Holarctic   | --    | --           | --        |    |    |  |
| <i>L. audouinii</i>             | Pair        | Pair        | Paleartic   | --    | --           | --        |    |    |  |
| <i>L. delawarensis</i>          | Pair        | Pair        | Nearctic    | --    | --           | --        |    |    |  |
| <i>L. californicus</i>          | Pair        | Pair        | Nearctic    | --    | --           | --        |    |    |  |
| <i>L. marinus</i>               | Pair        | Pair        | Holarctic   | --    | --           | --        |    |    |  |
| <i>L. dominicanus</i>           | Pair        | Pair        | Widespread  | --    | --           | --        |    |    |  |
| <i>L. glaucescens</i>           | Pair        | Pair        | Holarctic   | --    | --           | --        |    |    |  |
| <i>L. occidentalis</i>          | Pair        | Pair        | Nearctic    | --    | --           | --        |    |    |  |
| <i>L. livens</i>                | Pair        | Pair        | Nearctic    | --    | --           | --        |    |    |  |
| <i>L. hyperboreus</i>           | Pair        | Pair        | Holarctic   | --    | --           | --        |    |    |  |
| <i>L. glaucooides</i>           | Pair        | Pair        | Holarctic   | --    | --           | --        |    |    |  |
| <i>L. argentatus</i>            | Pair        | Pair        | Holarctic   | --    | --           | --        |    |    |  |
| <i>L. armenicus</i>             | Pair        | Pair        | Paleartic   | --    | --           | --        |    |    |  |
| <i>L. schistisagus</i>          | Pair        | Pair        | Paleartic   | --    | --           | --        |    |    |  |
| <i>L. cachinnans</i>            | Pair        | Pair        | Paleartic   | --    | --           | --        |    |    |  |
| <i>L. fuscus</i>                | Pair        | Pair        | Paleartic   | --    | --           | --        |    |    |  |
| <i>L. ichthyaetus</i>           | Pair        | Pair        | Paleartic   | --    | --           | --        |    |    |  |
| <i>L. brunnicephalus</i>        | Pair        | Pair        | Paleartic   | --    | --           | --        |    |    |  |

|                               |        |        |             |       |              |           |     |       |
|-------------------------------|--------|--------|-------------|-------|--------------|-----------|-----|-------|
| <i>L. cirrocephalus</i>       | Pair   | Pair   | Widespread  | --    | --           | --        |     |       |
| <i>L. hartlaubii</i>          | Pair   | Pair   | Africa      | --    | --           | --        |     |       |
| <i>L. novaehollandiae</i>     | Pair   | Pair   | Australia   | --    | --           | --        |     |       |
| <i>L. scopulinus</i>          | Pair   | Pair   | Australia   | --    | --           | --        |     |       |
| <i>L. bulleri</i>             | Pair   | Pair   | Australia   | --    | --           | --        |     |       |
| <i>L. maculipennis</i>        | Pair   | Pair   | Neotropical | --    | --           | --        |     |       |
| <i>L. ridibundus</i>          | Pair   | Pair   | Palaearctic | --    | --           | --        |     |       |
| <i>L. genei</i>               | Pair   | Pair   | Palaearctic | --    | --           | --        |     |       |
| <i>L. philadelphia</i>        | Pair   | Pair   | Nearctic    | --    | --           | --        |     |       |
| <i>L. saundersi</i>           | Pair   | Pair   | Palaearctic | --    | --           | --        |     |       |
| <i>L. serranus</i>            | Pair   | Pair   | Neotropical | --    | --           | --        |     |       |
| <i>L. melanocephalus</i>      | Pair   | Pair   | Palaearctic | --    | --           | --        |     |       |
| <i>L. relictus</i>            | Pair   | Pair   | Palaearctic | --    | --           | --        |     |       |
| <i>L. fuliginosus</i>         | Pair   | Pair   | Neotropical | --    | --           | --        |     |       |
| <i>L. atricilla</i>           | Pair   | Pair   | Widespread  | --    | --           | --        |     |       |
| <i>L. pipixcan</i>            | Pair   | Pair   | Nearctic    | --    | --           | --        |     |       |
| <i>L. minutus</i>             | Pair   | Pair   | Widespread  | --    | --           | --        |     |       |
| <i>Pagophila eburnea</i>      | Pair   | Pair   | Holarctic   | --    | --           | --        |     |       |
| <i>Rhodostethia rosea</i>     | Pair   | Pair   | Holarctic   | --    | --           | --        |     |       |
| <i>Xema sabini</i>            | Pair   | Pair   | Holarctic   | --    | --           | --        |     |       |
| <i>Creagrus furcatus</i>      | Pair   | Pair   | Neotropical | --    | --           | --        |     |       |
| <i>Rissa tridactyla</i>       | Pair   | Pair   | Holarctic   | --    | --           | --        |     |       |
| <i>R. brevirostris</i>        | Pair   | Pair   | Holarctic   | --    | --           | --        |     |       |
| <b>Charadrii: Rynchopidae</b> |        |        |             |       |              |           |     |       |
| <i>Rynchops niger</i>         | Pair   | Pair   | Neotropical | [209] | bbdaaabaaaab | [198-200] |     |       |
| <i>R. flavirostris</i>        | Pair   | Pair   | Africa      | --    | --           | --        |     |       |
| <i>R. albicollis</i>          | Pair   | Pair   | Indomalayan | --    | --           | --        |     |       |
| <b>Charadrii: Sternidae</b>   |        |        |             |       |              |           |     |       |
| <i>Anous stolidus</i>         | Pair   | Pair   | Widespread  | [210] | bbdaaabaaaab | [198-200] | a   | [211] |
| <i>A. minutus</i>             | Pair   | Pair   | Widespread  | --    | --           | --        | --  | --    |
| <i>A. tenuirostris</i>        | Pair   | Pair   | Widespread  | --    | --           | --        | --  | --    |
| <i>Gygis alba</i>             | Pair   | Pair   | Widespread  | [212] | --           | --        | ba  | --    |
| <i>G. microrhyncha</i>        | Subspp | Subspp | Australia   | [210] | --           | --        | --  | --    |
| <i>Sternula albifrons</i>     | Pair   | Pair   | Widespread  | --    | --           | --        | bba | --    |
| <i>S. saundersi</i>           | Pair   | Pair   | Widespread  | --    | --           | --        | --  | --    |
| <i>S. antillarum</i>          | Pair   | Pair   | Nearctic    | --    | --           | --        | --  | --    |
| <i>S. supercilialis</i>       | Pair   | Pair   | Neotropical | --    | --           | --        | --  | --    |
| <i>S. lorata</i>              | Pair   | Pair   | Neotropical | --    | --           | --        | --  | --    |
| <i>S. nereis</i>              | Pair   | Pair   | Australia   | --    | --           | --        | --  | --    |
| <i>S. balaenarum</i>          | Pair   | Pair   | Africa      | --    | --           | --        | --  | --    |
| <i>Onychoprion aleutica</i>   | Pair   | Pair   | Holarctic   | --    | --           | --        | --  | --    |
| <i>O. lunata</i>              | Pair   | Pair   | Australia   | --    | --           | --        | --  | --    |
| <i>O. anaethetus</i>          | Pair   | Pair   | Widespread  | --    | --           | --        | --  | --    |

|                               |            |      |             |                 |    |    |           |    |
|-------------------------------|------------|------|-------------|-----------------|----|----|-----------|----|
| <i>O. fuscata</i>             | Occasional | Pair | Widespread  | [210, 213]      | -- | -- | --        | -- |
| <i>Phaetusa simplex</i>       | Pair       | Pair | Neotropical | [210]           | -- | -- | bbba      | -- |
| <i>Geochelidon nilotica</i>   | Pair       | Pair | Widespread  | --              | -- | -- | bbbba     | -- |
| <i>Hydroprogne caspia</i>     | Pair       | Pair | Widespread  | --              | -- | -- | --        | -- |
| <i>Larosterna inca</i>        | Pair       | Pair | Neotropical | --              | -- | -- | bbbbb     | -- |
| <i>Chlidonias albostratus</i> | Pair       | Pair | Australia   | --              | -- | -- | bbbbbba   | -- |
| <i>C. hybridus</i>            | Pair       | Pair | Widespread  | --              | -- | -- | --        | -- |
| <i>C. leucopterus</i>         | Pair       | Pair | Palaearctic | --              | -- | -- | --        | -- |
| <i>C. niger</i>               | Pair       | Pair | Holarctic   | --              | -- | -- | --        | -- |
| <i>Thalasseus elegans</i>     | Pair       | Pair | Nearctic    | --              | -- | -- | bbbbbbba  | -- |
| <i>T. bengalensis</i>         | Pair       | Pair | Widespread  | --              | -- | -- | --        | -- |
| <i>T. bergii</i>              | Pair       | Pair | Widespread  | --              | -- | -- | --        | -- |
| <i>T. bernsteini</i>          | Unknown    | Pair | Palaearctic | --              | -- | -- | --        | -- |
| <i>T. sandvicensis</i>        | Pair       | Pair | Widespread  | --              | -- | -- | --        | -- |
| <i>Sterna repressa</i>        | Pair       | Pair | Africa      | --              | -- | -- | bbbbbbbbb | -- |
| <i>S. acuticauda</i>          | Pair       | Pair | Indomalayan | --              | -- | -- | --        | -- |
| <i>S. aurantia</i>            | Pair       | Pair | Indomalayan | --              | -- | -- | --        | -- |
| <i>S. maxima</i>              | Pair       | Pair | Widespread  | --              | -- | -- | --        | -- |
| <i>S. dougallii</i>           | Occasional | Pair | Widespread  | [214]           | -- | -- | --        | -- |
| <i>S. striata</i>             | Pair       | Pair | Australia   | [210]           | -- | -- | --        | -- |
| <i>S. sumatrana</i>           | Pair       | Pair | Widespread  | --              | -- | -- | --        | -- |
| <i>S. hirundinacea</i>        | Pair       | Pair | Neotropical | --              | -- | -- | --        | -- |
| <i>S. hirundo</i>             | Occasional | Pair | Holarctic   | [210, 215, 216] | -- | -- | --        | -- |
| <i>S. paradisaea</i>          | Occasional | Pair | Holarctic   | [210, 217]      | -- | -- | --        | -- |
| <i>S. vittata</i>             | Pair       | Pair | Antarctic   | [210]           | -- | -- | --        | -- |
| <i>S. virgata</i>             | Pair       | Pair | Antarctic   | --              | -- | -- | --        | -- |
| <i>S. forsteri</i>            | Pair       | Pair | Nearctic    | --              | -- | -- | --        | -- |
| <i>S. trudeaui</i>            | Pair       | Pair | Neotropical | --              | -- | -- | --        | -- |
| <i>Procelsterna cerulea</i>   | Pair       | Pair | Australia   | --              | -- | -- | Untested  | -- |

**Charadrii: Stercorariidae**

|                               |             |             |             |            |             |           |
|-------------------------------|-------------|-------------|-------------|------------|-------------|-----------|
| <i>Catharacta skua</i>        | Pair        | Pair        | Palaearctic | [218]      | bbdaaabaaba | [198-200] |
| <i>C. antarctica</i>          | Pair        | Pair        | Antarctic   | --         | --          | --        |
| <i>C. lonnbergi</i>           | Cooperation | Cooperation | Antarctic   | --         | --          | --        |
| <i>C. chilensis</i>           | Pair        | Pair        | Neotropical | --         | --          | --        |
| <i>C. maccormicki</i>         | Pair        | Pair        | Antarctic   | --         | --          | --        |
| <i>Stercorarius pomarinus</i> | Pair        | Pair        | Palaearctic | --         | --          | --        |
| <i>S. parasiticus</i>         | Occasional  | Pair        | Palaearctic | [218, 219] | --          | --        |
| <i>S. longicaudus</i>         | Pair        | Pair        | Palaearctic | [218]      | --          | --        |

**Charadrii: Alcidae**

|                   |            |      |           |            |             |           |
|-------------------|------------|------|-----------|------------|-------------|-----------|
| <i>Alle alle</i>  | Pair       | Pair | Holarctic | [220]      | bbdaaabaabb | [198-200] |
| <i>Uria aalge</i> | Occasional | Pair | Holarctic | [220-222]  | --          | --        |
| <i>U. lomvia</i>  | Pair       | Pair | Holarctic | [220, 223] | --          | --        |
| <i>Alca torda</i> | Pair       | Pair | Holarctic | [220]      | --          | --        |

|                                    |           |           |             |            |            |           |
|------------------------------------|-----------|-----------|-------------|------------|------------|-----------|
| <i>Cephus grylle</i>               | Pair      | Pair      | Holarctic   | --         | --         | --        |
| <i>C. columba</i>                  | Pair      | Pair      | Holarctic   | --         | --         | --        |
| <i>C. carbo</i>                    | Pair      | Pair      | Paleartic   | --         | --         | --        |
| <i>Brachyramphus marmoratus</i>    | Pair      | Pair      | Holarctic   | --         | --         | --        |
| <i>B. brevirostris</i>             | Pair      | Pair      | Holarctic   | --         | --         | --        |
| <i>Synthliboramphus hypoleucus</i> | Pair      | Pair      | Nearctic    | --         | --         | --        |
| <i>S. craveri</i>                  | Pair      | Pair      | Nearctic    | --         | --         | --        |
| <i>S. antiquus</i>                 | Pair      | Pair      | Holarctic   | --         | --         | --        |
| <i>S. wumizusume</i>               | Pair      | Pair      | Paleartic   | --         | --         | --        |
| <i>Ptychoramphus aleuticus</i>     | Pair      | Pair      | Holarctic   | --         | --         | --        |
| <i>Cyclorhynchus psittacula</i>    | Captivity | Pair      | Holarctic   | [220, 224] | --         | --        |
| <i>Aethia cristatella</i>          | Pair      | Pair      | Holarctic   | [220]      | --         | --        |
| <i>A. pygmaea</i>                  | Pair      | Pair      | Holarctic   | --         | --         | --        |
| <i>A. pusilla</i>                  | Pair      | Pair      | Holarctic   | --         | --         | --        |
| <i>Cerorhinca monocerata</i>       | Pair      | Pair      | Holarctic   | --         | --         | --        |
| <i>Fratercula arctica</i>          | Pair      | Pair      | Holarctic   | --         | --         | --        |
| <i>F. corniculata</i>              | Pair      | Pair      | Holarctic   | --         | --         | --        |
| <i>F. cirrhata</i>                 | Pair      | Pair      | Holarctic   | --         | --         | --        |
| <b>Charadrii: Glareolidae</b>      |           |           |             |            |            |           |
| <i>Pluvianus aegyptius</i>         | Pair      | Pair      | Africa      | [225]      | bbdaaababa | [198-200] |
| <i>Rhinoptilus africanus</i>       | Pair      | Pair      | Africa      | --         | --         | --        |
| <i>R. chalconotus</i>              | Pair      | Pair      | Africa      | --         | --         | --        |
| <i>R. cinctus</i>                  | Pair      | Pair      | Africa      | --         | --         | --        |
| <i>R. bitorquatus</i>              | Unknown   | Pair      | Indomalayan | --         | --         | --        |
| <i>Cursorius cursor</i>            | Pair      | Pair      | Widespread  | --         | --         | --        |
| <i>C. rufus</i>                    | Unknown   | Pair      | Africa      | --         | --         | --        |
| <i>C. temminckii</i>               | Pair      | Pair      | Africa      | --         | --         | --        |
| <i>C. coromandelicus</i>           | Pair      | Pair      | Indomalayan | --         | --         | --        |
| <i>Glareola pratincola</i>         | Pair      | Pair      | Widespread  | --         | --         | --        |
| <i>G. maldivarum</i>               | Pair      | Pair      | Widespread  | --         | --         | --        |
| <i>G. nordmanni</i>                | Pair      | Pair      | Paleartic   | --         | --         | --        |
| <i>G. ocularis</i>                 | Unknown   | Pair      | Africa      | --         | --         | --        |
| <i>G. nuchalis</i>                 | Pair      | Pair      | Africa      | --         | --         | --        |
| <i>G. cinerea</i>                  | Unknown   | Pair      | Africa      | --         | --         | --        |
| <i>G. lactea</i>                   | Pair      | Pair      | Indomalayan | --         | --         | --        |
| <i>Stiltia isabella</i>            | Pair      | Pair      | Australia   | --         | --         | --        |
| <b>Charadrii: Dromadidae</b>       |           |           |             |            |            |           |
| <i>Dromas ardeola</i>              | Pair      | Pair      | Paleartic   | [226]      | bbdaaababb | [198-200] |
| <b>Charadrii: Turnicidae</b>       |           |           |             |            |            |           |
| <i>Turnix sylvatica</i>            | Male only | Male only | Widespread  | [15]       | bbdaaabbb  | [198-200] |
| <i>T. maculosa</i>                 | Male only | Male only | Australia   | --         | --         | --        |
| <i>T. nana</i>                     | Subspp    | Subspp    | Africa      | --         | --         | --        |
| <i>T. hottentotta</i>              | Male only | Male only | Africa      | --         | --         | --        |

|                                |            |           |             |            |          |           |      |       |
|--------------------------------|------------|-----------|-------------|------------|----------|-----------|------|-------|
| <i>T. tanki</i>                | Male only  | Male only | Indomalayan | --         | --       | --        |      |       |
| <i>T. ocellata</i>             | Male only  | Male only | Indomalayan | --         | --       | --        |      |       |
| <i>T. suscitator</i>           | Male only  | Male only | Indomalayan | --         | --       | --        |      |       |
| <i>T. nigricollis</i>          | Male only  | Male only | Africa      | --         | --       | --        |      |       |
| <i>T. melanogaster</i>         | Male only  | Male only | Australia   | --         | --       | --        |      |       |
| <i>T. castanota</i>            | Male only  | Male only | Australia   | --         | --       | --        |      |       |
| <i>T. olivii</i>               | Male only  | Male only | Australia   | --         | --       | --        |      |       |
| <i>T. varia</i>                | Male only  | Male only | Australia   | --         | --       | --        |      |       |
| <i>T. worcesteri</i>           | Unknown    | Male only | Indomalayan | --         | --       | --        |      |       |
| <i>T. everetti</i>             | Unknown    | Male only | Australia   | --         | --       | --        |      |       |
| <i>T. pyrrhothorax</i>         | Male only  | Male only | Australia   | --         | --       | --        |      |       |
| <i>T. velox</i>                | Male only  | Male only | Australia   | --         | --       | --        |      |       |
| <i>Ortyxelos meiffrenii</i>    | Unknown    | Male only | Africa      | --         | --       | --        |      |       |
| <b>Charadrii: Charadriidae</b> |            |           |             |            |          |           |      |       |
| <i>Pluvialis apricaria</i>     | Pair       | Pair      | Palaearctic | [227]      | bbdaabaa | [198-200] | a    | [202] |
| <i>P. fulva</i>                | Pair       | Pair      | Holarctic   | --         | --       | --        | --   | --    |
| <i>P. dominica</i>             | Pair       | Pair      | Nearctic    | --         | --       | --        | --   | --    |
| <i>P. squatarola</i>           | Pair       | Pair      | Holarctic   | --         | --       | --        | --   | --    |
| <i>Oreopholus ruficollis</i>   | Unknown    | Pair      | Neotropical | --         | --       | --        | ba   | --    |
| <i>Eudromias morinellus</i>    | Male only  | Male only | Palaearctic | --         | --       | --        | baaa | --    |
| <i>Phegornis mitchellii</i>    | Unknown    | Pair      | Neotropical | --         | --       | --        | bbab | --    |
| <i>Anarhynchus frontalis</i>   | Pair       | Pair      | Australia   | --         | --       | --        | bbac | --    |
| <i>Charadrius obscurus</i>     | Pair       | Pair      | Australia   | --         | --       | --        | bbad | --    |
| <i>C. hiaticula</i>            | Occasional | Pair      | Holarctic   | [227, 228] | --       | --        | --   | --    |
| <i>C. semipalmatus</i>         | Pair       | Pair      | Nearctic    | [227]      | --       | --        | --   | --    |
| <i>C. placidus</i>             | Unknown    | Pair      | Palaearctic | --         | --       | --        | --   | --    |
| <i>C. dubius</i>               | Occasional | Pair      | Widespread  | --         | --       | --        | --   | --    |
| <i>C. wilsonia</i>             | Pair       | Pair      | Neotropical | --         | --       | --        | --   | --    |
| <i>C. vociferus</i>            | Pair       | Pair      | Widespread  | --         | --       | --        | --   | --    |
| <i>C. thoracicus</i>           | Unknown    | Pair      | Africa      | --         | --       | --        | --   | --    |
| <i>C. sanctaehelenae</i>       | Unknown    | Pair      | Africa      | --         | --       | --        | --   | --    |
| <i>C. pecuarius</i>            | Pair       | Pair      | Africa      | --         | --       | --        | --   | --    |
| <i>C. tricollaris</i>          | Pair       | Pair      | Africa      | --         | --       | --        | --   | --    |
| <i>C. forbesi</i>              | Pair       | Pair      | Africa      | --         | --       | --        | --   | --    |
| <i>C. melodus</i>              | Pair       | Pair      | Nearctic    | --         | --       | --        | --   | --    |
| <i>C. pallidus</i>             | Pair       | Pair      | Africa      | --         | --       | --        | --   | --    |
| <i>C. alexandrinus</i>         | Pair       | Pair      | Widespread  | --         | --       | --        | --   | --    |
| <i>C. marginatus</i>           | Pair       | Pair      | Africa      | --         | --       | --        | --   | --    |
| <i>C. ruficapillus</i>         | Pair       | Pair      | Australia   | --         | --       | --        | --   | --    |
| <i>C. peronii</i>              | Pair       | Pair      | Indomalayan | --         | --       | --        | --   | --    |
| <i>C. javanicus</i>            | Unknown    | Pair      | Africa      | --         | --       | --        | --   | --    |
| <i>C. collaris</i>             | Unknown    | Pair      | Neotropical | --         | --       | --        | --   | --    |
| <i>C. bicinctus</i>            | Pair       | Pair      | Australia   | --         | --       | --        | --   | --    |

|                                  |             |             |             |            |    |    |      |    |
|----------------------------------|-------------|-------------|-------------|------------|----|----|------|----|
| <i>C. alticola</i>               | Unknown     | Pair        | Neotropical | --         | -- | -- | --   | -- |
| <i>C. falklandicus</i>           | Unknown     | Pair        | Neotropical | --         | -- | -- | --   | -- |
| <i>C. mongolus</i>               | Pair        | Pair        | Palaearctic | --         | -- | -- | --   | -- |
| <i>C. leschenaultii</i>          | Pair        | Pair        | Palaearctic | --         | -- | -- | --   | -- |
| <i>C. asiaticus</i>              | Pair        | Pair        | Palaearctic | --         | -- | -- | --   | -- |
| <i>C. veredus</i>                | Unknown     | Pair        | Palaearctic | --         | -- | -- | --   | -- |
| <i>C. montanus</i>               | Male only   | Male only   | Nearctic    | --         | -- | -- | --   | -- |
| <i>C. modestus</i>               | Pair        | Pair        | Neotropical | --         | -- | -- | --   | -- |
| <i>C. rubricollis</i>            | Pair        | Pair        | Australia   | --         | -- | -- | --   | -- |
| <i>Thinornis novaeseelandiae</i> | Pair        | Pair        | Australia   | --         | -- | -- | --   | -- |
| <i>Peltohyas australis</i>       | Pair        | Pair        | Australia   | --         | -- | -- | --   | -- |
| <i>Eelseyornis melanops</i>      | Pair        | Pair        | Australia   | --         | -- | -- | --   | -- |
| <i>Erythrogonys cinctus</i>      | Pair        | Pair        | Australia   | --         | -- | -- | bbba | -- |
| <i>Vanellus vanellus</i>         | Pair        | Pair        | Palaearctic | --         | -- | -- | bbbb | -- |
| <i>V. crassirostris</i>          | Pair        | Pair        | Africa      | --         | -- | -- | --   | -- |
| <i>V. malarbaricus</i>           | Pair        | Pair        | Indomalayan | --         | -- | -- | --   | -- |
| <i>V. tricolor</i>               | Pair        | Pair        | Australia   | --         | -- | -- | --   | -- |
| <i>V. miles</i>                  | Pair        | Pair        | Australia   | --         | -- | -- | --   | -- |
| <i>V. armatus</i>                | Pair        | Pair        | Africa      | --         | -- | -- | --   | -- |
| <i>V. spinosus</i>               | Pair        | Pair        | Africa      | --         | -- | -- | --   | -- |
| <i>V. duvaucelii</i>             | Unknown     | Pair        | Indomalayan | --         | -- | -- | --   | -- |
| <i>V. tectus</i>                 | Pair        | Pair        | Africa      | --         | -- | -- | --   | -- |
| <i>V. melanocephalus</i>         | Unknown     | Pair        | Africa      | --         | -- | -- | --   | -- |
| <i>V. cinereus</i>               | Pair        | Pair        | Indomalayan | --         | -- | -- | --   | -- |
| <i>V. indicus</i>                | Pair        | Pair        | Indomalayan | --         | -- | -- | --   | -- |
| <i>V. albiceps</i>               | Pair        | Pair        | Africa      | --         | -- | -- | --   | -- |
| <i>V. senegallus</i>             | Pair        | Pair        | Africa      | --         | -- | -- | --   | -- |
| <i>V. lugubris</i>               | Pair        | Pair        | Africa      | --         | -- | -- | --   | -- |
| <i>V. melanopterus</i>           | Pair        | Pair        | Africa      | --         | -- | -- | --   | -- |
| <i>V. coronatus</i>              | Pair        | Pair        | Africa      | --         | -- | -- | --   | -- |
| <i>V. superciliosus</i>          | Pair        | Pair        | Africa      | --         | -- | -- | --   | -- |
| <i>V. gregarius</i>              | Pair        | Pair        | Palaearctic | --         | -- | -- | --   | -- |
| <i>V. leucurus</i>               | Pair        | Pair        | Palaearctic | --         | -- | -- | --   | -- |
| <i>V. cayanus</i>                | Unknown     | Pair        | Neotropical | --         | -- | -- | --   | -- |
| <i>V. chilensis</i>              | Cooperation | Cooperation | Neotropical | [227, 229] | -- | -- | --   | -- |
| <i>V. resplendens</i>            | Unknown     | Pair        | Neotropical | [227]      | -- | -- | --   | -- |

**Charadrii: Recurvirostridae**

|                                 |        |        |             |       |           |           |
|---------------------------------|--------|--------|-------------|-------|-----------|-----------|
| <i>Ibidorhyncha struthersii</i> | Pair   | Pair   | Palaearctic | [230] | bbdaababa | [198-200] |
| <i>Himantopus himantopus</i>    | Pair   | Pair   | Widespread  | [231] | --        | --        |
| <i>H. leucocephalus</i>         | Subspp | Subspp | Unknown     | --    | --        | --        |
| <i>H. novaeseelandiae</i>       | Pair   | Pair   | Australia   | --    | --        | --        |
| <i>H. mexicanus</i>             | Subspp | Subspp | Unknown     | --    | --        | --        |
| <i>H. melanurus</i>             | Subspp | Subspp | Unknown     | --    | --        | --        |

|                                               |             |             |             |            |           |           |    |
|-----------------------------------------------|-------------|-------------|-------------|------------|-----------|-----------|----|
| <i>Cladorhynchus leucocephalus</i>            | Pair        | Pair        | Australia   | --         | --        | --        |    |
| <i>Recurvirostra avosetta</i>                 | Pair        | Pair        | Widespread  | --         | --        | --        |    |
| <i>R. americana</i>                           | Pair        | Pair        | Nearctic    | --         | --        | --        |    |
| <i>R. novaehollandiae</i>                     | Pair        | Pair        | Australia   | --         | --        | --        |    |
| <i>R. andina</i>                              | Pair        | Pair        | Neotropical | --         | --        | --        |    |
| <b>Charadrii: Haematopodidae</b>              |             |             |             |            |           |           |    |
| <i>Haematopus ostralegus</i>                  | Cooperation | Cooperation | Paelearctic | [232, 233] | bbdaababb | [198-200] |    |
| <i>H. moquini</i>                             | Pair        | Pair        | Africa      | [233]      | --        | --        |    |
| <i>H. finschi</i>                             | Pair        | Pair        | Australia   | --         | --        | --        |    |
| <i>H. bachmani</i>                            | Pair        | Pair        | Nearctic    | --         | --        | --        |    |
| <i>H. palliatus</i>                           | Occasional  | Pair        | Neotropical | [233-236]  | --        | --        |    |
| <i>H. longirostris</i>                        | Pair        | Pair        | Australia   | [233]      | --        | --        |    |
| <i>H. unicolor</i>                            | Pair        | Pair        | Australia   | --         | --        | --        |    |
| <i>H. fuliginosus</i>                         | Pair        | Pair        | Australia   | --         | --        | --        |    |
| <i>H. ater</i>                                | Pair        | Pair        | Neotropical | --         | --        | --        |    |
| <i>H. leucopodus</i>                          | Pair        | Pair        | Neotropical | --         | --        | --        |    |
| <b>Charadrii: Burhinidae</b>                  |             |             |             |            |           |           |    |
| <i>Burhinus oedicephalus</i>                  | Pair        | Pair        | Widespread  | [237]      | bbdaabba  | [198-200] |    |
| <i>B. senegalensis</i>                        | Pair        | Pair        | Africa      | --         | --        | --        |    |
| <i>B. vermiculatus</i>                        | Pair        | Pair        | Africa      | --         | --        | --        |    |
| <i>B. capensis</i>                            | Pair        | Pair        | Africa      | --         | --        | --        |    |
| <i>B. bistriatus</i>                          | Pair        | Pair        | Neotropical | --         | --        | --        |    |
| <i>B. superciliosus</i>                       | Unknown     | Pair        | Neotropical | --         | --        | --        |    |
| <i>B. grallarius</i>                          | Pair        | Pair        | Australia   | --         | --        | --        |    |
| <i>B. recurvirostris</i>                      | Pair        | Pair        | Indomalayan | --         | --        | --        |    |
| <i>B. giganteus</i>                           | Pair        | Pair        | Widespread  | --         | --        | --        |    |
| <b>Charadrii: Chionidae</b>                   |             |             |             |            |           |           |    |
| <i>Chionis alba</i>                           | Pair        | Pair        | Antarctic   | [238]      | bbdaabba  | [198-200] |    |
| <i>C. minor</i>                               | Pair        | Pair        | Antarctic   | --         | --        | --        |    |
| <b>Charadrii: Pluvianellidae</b>              |             |             |             |            |           |           |    |
| <i>Pluvianellus socialis</i>                  | Pair        | Pair        | Neotropical | [227]      | bbdaabbbb | [198-200] |    |
| <b>Falconides: Accipitridae: Pandioninae</b>  |             |             |             |            |           |           |    |
| <i>Pandion haliaetus</i>                      | Occasional  | Pair        | Widespread  | [239, 240] | bbdabaaa  | [3]       | a  |
| <b>Falconides: Accipitridae: Accipitrinae</b> |             |             |             |            |           |           |    |
| <i>Aviceda cuculoides</i>                     | Pair        | Pair        | Africa      | [241]      | bbdabaaa  | [3]       | b  |
| <i>A. madagascariensis</i>                    | Unknown     | Pair        | Africa      | --         | --        | --        | -- |
| <i>A. jerdoni</i>                             | Unknown     | Pair        | Indomalayan | --         | --        | --        | -- |
| <i>A. subcristata</i>                         | Pair        | Pair        | Australia   | --         | --        | --        | -- |
| <i>A. leuphotes</i>                           | Unknown     | Pair        | Indomalayan | --         | --        | --        | -- |
| <i>Leptodon cayanensis</i>                    | Unknown     | Pair        | Neotropical | --         | --        | --        | -- |
| <i>L. forbesi</i>                             | Unknown     | Pair        | Neotropical | --         | --        | --        | -- |
| <i>Chondrohierax uncinatus</i>                | Pair        | Pair        | Neotropical | --         | --        | --        | -- |
| <i>Henicoperms longicauda</i>                 | Unknown     | Pair        | Australia   | --         | --        | --        | -- |

|                                 |             |             |             |                      |    |    |    |
|---------------------------------|-------------|-------------|-------------|----------------------|----|----|----|
| <i>H. infuscatus</i>            | Unknown     | Pair        | Australia   | --                   | -- | -- | -- |
| <i>Pernis apivorus</i>          | Occasional  | Pair        | Palaearctic | [241, 242]           | -- | -- | -- |
| <i>P. ptilorhynchus</i>         | Pair        | Pair        | Palaearctic | [241]                | -- | -- | -- |
| <i>P. celebensis</i>            | Unknown     | Pair        | Indomalayan | --                   | -- | -- | -- |
| <i>Lophoictinia isura</i>       | Pair        | Pair        | Australia   | --                   | -- | -- | -- |
| <i>Hamirostra melanosternon</i> | Cooperation | Cooperation | Australia   | [241, 243]           | -- | -- | -- |
| <i>Elanoides forficatus</i>     | Pair        | Pair        | Neotropical | [241]                | -- | -- | -- |
| <i>Macheiramphus alcinus</i>    | Pair        | Pair        | Widespread  | --                   | -- | -- | -- |
| <i>Gampsonyx swainsonii</i>     | Pair        | Pair        | Neotropical | --                   | -- | -- | -- |
| <i>Elanus caeruleus</i>         | Pair        | Pair        | Widespread  | --                   | -- | -- | -- |
| <i>E. axillaris</i>             | Pair        | Pair        | Australia   | --                   | -- | -- | -- |
| <i>E. leucurus</i>              | Pair        | Pair        | Neotropical | --                   | -- | -- | -- |
| <i>E. scriptus</i>              | Pair        | Pair        | Australia   | --                   | -- | -- | -- |
| <i>Chelictinia riocourii</i>    | Unknown     | Pair        | Africa      | --                   | -- | -- | -- |
| <i>Rostrhamus sociabilis</i>    | Occasional  | Pair        | Neotropical | [244]                | -- | -- | -- |
| <i>R. hamatus</i>               | Pair        | Pair        | Neotropical | [241]                | -- | -- | -- |
| <i>Harpagus bidentatus</i>      | Unknown     | Pair        | Neotropical | --                   | -- | -- | -- |
| <i>H. diodon</i>                | Unknown     | Pair        | Neotropical | --                   | -- | -- | -- |
| <i>Ictinia mississippiensis</i> | Cooperation | Cooperation | Nearctic    | [241, 245]           | -- | -- | -- |
| <i>I. plumbea</i>               | Pair        | Pair        | Neotropical | [241]                | -- | -- | -- |
| <i>Milvus milvus</i>            | Occasional  | Pair        | Palaearctic | [241, 246, 247]      | -- | -- | -- |
| <i>M. migrans</i>               | Pair        | Pair        | Widespread  | [241, 247]           | -- | -- | -- |
| <i>M. lineatus</i>              | Subspp      | Subspp      | Indomalayan | [241]                | -- | -- | -- |
| <i>Haliastur sphenurus</i>      | Pair        | Pair        | Australia   | --                   | -- | -- | -- |
| <i>H. indus</i>                 | Pair        | Pair        | Widespread  | --                   | -- | -- | -- |
| <i>Haliaeetus leucogaster</i>   | Pair        | Pair        | Widespread  | --                   | -- | -- | -- |
| <i>H. sanfordi</i>              | Unknown     | Pair        | Australia   | [125, 241]           | -- | -- | -- |
| <i>H. vocifer</i>               | Pair        | Pair        | Africa      | [241]                | -- | -- | -- |
| <i>H. vociferoides</i>          | Cooperation | Cooperation | Africa      | [248]                | -- | -- | -- |
| <i>H. leucoryphus</i>           | Pair        | Pair        | Palaearctic | [241, 247]           | -- | -- | -- |
| <i>H. albicilla</i>             | Occasional  | Pair        | Palaearctic | [241, 246, 247]      | -- | -- | -- |
| <i>H. leucocephalus</i>         | Occasional  | Pair        | Nearctic    | [241, 247, 249, 250] | -- | -- | -- |
| <i>H. pelagicus</i>             | Pair        | Pair        | Palaearctic | [241, 247]           | -- | -- | -- |
| <i>Ichthyophaga humilis</i>     | Unknown     | Pair        | Indomalayan | [241]                | -- | -- | -- |
| <i>I. ichthyaetus</i>           | Pair        | Pair        | Indomalayan | --                   | -- | -- | -- |
| <i>Gypohierax angolensis</i>    | Pair        | Pair        | Africa      | [241, 247]           | -- | -- | -- |
| <i>Gypaetus barbatus</i>        | Cooperation | Cooperation | Widespread  | [241, 247, 251-254]  | -- | -- | -- |
| <i>Neophron percnopterus</i>    | Occasional  | Pair        | Widespread  | [241, 247, 255, 256] | -- | -- | -- |
| <i>Necrosyrtes monachus</i>     | Pair        | Pair        | Africa      | [241, 247]           | -- | -- | -- |
| <i>Gyps africanus</i>           | Pair        | Pair        | Africa      | --                   | -- | -- | -- |
| <i>G. bengalensis</i>           | Pair        | Pair        | Indomalayan | --                   | -- | -- | -- |
| <i>G. indicus</i>               | Pair        | Pair        | Indomalayan | --                   | -- | -- | -- |
| <i>G. rueppellii</i>            | Pair        | Pair        | Africa      | --                   | -- | -- | -- |



|                                  |             |             |             |                      |    |    |    |
|----------------------------------|-------------|-------------|-------------|----------------------|----|----|----|
| <i>G. himalayensis</i>           | Pair        | Pair        | Palaearctic | --                   | -- | -- | -- |
| <i>G. fulvus</i>                 | Pair        | Pair        | Palaearctic | --                   | -- | -- | -- |
| <i>G. coprotheres</i>            | Pair        | Pair        | Africa      | --                   | -- | -- | -- |
| <i>Aegypius monachus</i>         | Pair        | Pair        | Palaearctic | --                   | -- | -- | -- |
| <i>Torgos tracheliotus</i>       | Pair        | Pair        | Africa      | --                   | -- | -- | -- |
| <i>Trigonoceps occipitalis</i>   | Pair        | Pair        | Africa      | --                   | -- | -- | -- |
| <i>Sarcogyps calvus</i>          | Pair        | Pair        | Indomalayan | --                   | -- | -- | -- |
| <i>Circaetus gallicus</i>        | Pair        | Pair        | Widespread  | --                   | -- | -- | -- |
| <i>C. pectoralis</i>             | Pair        | Pair        | Africa      | --                   | -- | -- | -- |
| <i>C. cinereus</i>               | Pair        | Pair        | Africa      | --                   | -- | -- | -- |
| <i>C. fasciolatus</i>            | Unknown     | Pair        | Africa      | --                   | -- | -- | -- |
| <i>C. cinerascens</i>            | Pair        | Pair        | Africa      | --                   | -- | -- | -- |
| <i>Terathopius ecaudatus</i>     | Cooperation | Cooperation | Africa      | [241, 247, 257]      | -- | -- | -- |
| <i>Spilornis cheela</i>          | Pair        | Pair        | Indomalayan | [241, 247]           | -- | -- | -- |
| <i>S. minimus</i>                | Unknown     | Pair        | Indomalayan | --                   | -- | -- | -- |
| <i>S. kinabaluensis</i>          | Unknown     | Pair        | Indomalayan | --                   | -- | -- | -- |
| <i>S. rufipectus</i>             | Unknown     | Pair        | Indomalayan | --                   | -- | -- | -- |
| <i>S. holospilus</i>             | Unknown     | Pair        | Indomalayan | --                   | -- | -- | -- |
| <i>S. elgini</i>                 | Unknown     | Pair        | Indomalayan | --                   | -- | -- | -- |
| <i>Dryotriorchis spectabilis</i> | Unknown     | Pair        | Africa      | --                   | -- | -- | -- |
| <i>Eutriorchis astur</i>         | Pair        | Pair        | Africa      | --                   | -- | -- | -- |
| <i>Circus aeruginosus</i>        | Occasional  | Pair        | Palaearctic | [241, 247, 258, 259] | -- | -- | -- |
| <i>C. ranivorus</i>              | Pair        | Pair        | Africa      | [241, 247, 257]      | -- | -- | -- |
| <i>C. spilnotus</i>              | Pair        | Pair        | Widespread  | [247]                | -- | -- | -- |
| <i>C. approximans</i>            | Pair        | Pair        | Australia   | [241, 247]           | -- | -- | -- |
| <i>C. maillardi</i>              | Pair        | Pair        | Africa      | --                   | -- | -- | -- |
| <i>C. buffoni</i>                | Cooperation | Cooperation | Neotropical | [241, 246, 247]      | -- | -- | -- |
| <i>C. assimilis</i>              | Pair        | Pair        | Australia   | [241, 247]           | -- | -- | -- |
| <i>C. maurus</i>                 | Occasional  | Pair        | Africa      | [241, 247, 257]      | -- | -- | -- |
| <i>C. cyaneus</i>                | Occasional  | Pair        | Widespread  | [241, 247, 260]      | -- | -- | -- |
| <i>C. cinereus</i>               | Pair        | Pair        | Neotropical | [241, 247]           | -- | -- | -- |
| <i>C. macrourus</i>              | Pair        | Pair        | Palaearctic | --                   | -- | -- | -- |
| <i>C. melanoleucos</i>           | Pair        | Pair        | Palaearctic | --                   | -- | -- | -- |
| <i>C. pygargus</i>               | Occasional  | Pair        | Palaearctic | [241, 247, 261-263]  | -- | -- | -- |
| <i>Polyboroides typus</i>        | Pair        | Pair        | Africa      | [241, 247, 257]      | -- | -- | -- |
| <i>P. radiatus</i>               | Unknown     | Pair        | Africa      | [241, 247]           | -- | -- | -- |
| <i>Kaupifalco monogrammicus</i>  | Pair        | Pair        | Africa      | [241, 247, 257]      | -- | -- | -- |
| <i>Melierax metabates</i>        | Pair        | Pair        | Africa      | --                   | -- | -- | -- |
| <i>M. poliopterus</i>            | Pair        | Pair        | Africa      | [241, 247]           | -- | -- | -- |
| <i>M. canorus</i>                | Cooperation | Cooperation | Africa      | [241, 247, 264]      | -- | -- | -- |
| <i>Micronisus gabor</i>          | Pair        | Pair        | Africa      | [241, 247, 257]      | -- | -- | -- |
| <i>Accipiter poliogaster</i>     | Unknown     | Pair        | Neotropical | [241, 247]           | -- | -- | -- |
| <i>A. trivirgatus</i>            | Pair        | Pair        | Indomalayan | --                   | -- | -- | -- |

|                            |            |      |             |                 |    |    |    |
|----------------------------|------------|------|-------------|-----------------|----|----|----|
| <i>A. griseiceps</i>       | Unknown    | Pair | Indomalayan | --              | -- | -- | -- |
| <i>A. toussenelii</i>      | Unknown    | Pair | Africa      | --              | -- | -- | -- |
| <i>A. tachiro</i>          | Pair       | Pair | Africa      | [241, 247, 257] | -- | -- | -- |
| <i>A. castanilius</i>      | Unknown    | Pair | Africa      | [241, 247]      | -- | -- | -- |
| <i>A. badius</i>           | Pair       | Pair | Widespread  | [241, 247, 257] | -- | -- | -- |
| <i>A. butleri</i>          | Unknown    | Pair | Indomalayan | [247]           | -- | -- | -- |
| <i>A. brevipes</i>         | Pair       | Pair | Palaearctic | [241, 247]      | -- | -- | -- |
| <i>A. soloensis</i>        | Pair       | Pair | Palaearctic | --              | -- | -- | -- |
| <i>A. francesii</i>        | Pair       | Pair | Africa      | --              | -- | -- | -- |
| <i>A. trinotatus</i>       | Unknown    | Pair | Indomalayan | --              | -- | -- | -- |
| <i>A. novaehollandiae</i>  | Pair       | Pair | Australia   | --              | -- | -- | -- |
| <i>A. fasciatus</i>        | Pair       | Pair | Australia   | --              | -- | -- | -- |
| <i>A. melanochlamys</i>    | Unknown    | Pair | Australia   | --              | -- | -- | -- |
| <i>A. albogularis</i>      | Unknown    | Pair | Australia   | [125, 241, 247] | -- | -- | -- |
| <i>A. rufitorques</i>      | Unknown    | Pair | Australia   | [241, 247]      | -- | -- | -- |
| <i>A. haplochrous</i>      | Unknown    | Pair | Australia   | --              | -- | -- | -- |
| <i>A. henicogrammus</i>    | Unknown    | Pair | Australia   | --              | -- | -- | -- |
| <i>A. luteoschistaceus</i> | Unknown    | Pair | Australia   | --              | -- | -- | -- |
| <i>A. imitator</i>         | Unknown    | Pair | Australia   | --              | -- | -- | -- |
| <i>A. poliocephalus</i>    | Unknown    | Pair | Australia   | --              | -- | -- | -- |
| <i>A. princeps</i>         | Unknown    | Pair | Australia   | --              | -- | -- | -- |
| <i>A. superciliosus</i>    | Unknown    | Pair | Neotropical | --              | -- | -- | -- |
| <i>A. collaris</i>         | Unknown    | Pair | Neotropical | --              | -- | -- | -- |
| <i>A. erythropus</i>       | Unknown    | Pair | Africa      | --              | -- | -- | -- |
| <i>A. minullus</i>         | Pair       | Pair | Africa      | [241, 247, 257] | -- | -- | -- |
| <i>A. gularis</i>          | Pair       | Pair | Palaearctic | [241, 247]      | -- | -- | -- |
| <i>A. virgatus</i>         | Pair       | Pair | Indomalayan | --              | -- | -- | -- |
| <i>A. nanus</i>            | Unknown    | Pair | Australia   | --              | -- | -- | -- |
| <i>A. erythrauchen</i>     | Unknown    | Pair | Australia   | --              | -- | -- | -- |
| <i>A. cirrocephalus</i>    | Pair       | Pair | Australia   | --              | -- | -- | -- |
| <i>A. brachyurus</i>       | Unknown    | Pair | Australia   | --              | -- | -- | -- |
| <i>A. rhodogaster</i>      | Unknown    | Pair | Australia   | --              | -- | -- | -- |
| <i>A. madagascariensis</i> | Unknown    | Pair | Africa      | --              | -- | -- | -- |
| <i>A. ovampensis</i>       | Pair       | Pair | Africa      | [241, 247, 257] | -- | -- | -- |
| <i>A. nesus</i>            | Occasional | Pair | Palaearctic | [241, 247, 265] | -- | -- | -- |
| <i>A. rufiventris</i>      | Pair       | Pair | Africa      | [241, 247]      | -- | -- | -- |
| <i>A. striatus</i>         | Pair       | Pair | Widespread  | --              | -- | -- | -- |
| <i>A. chionogaster</i>     | Unknown    | Pair | Neotropical | [247]           | -- | -- | -- |
| <i>A. ventralis</i>        | Unknown    | Pair | Neotropical | --              | -- | -- | -- |
| <i>A. erythronemius</i>    | Unknown    | Pair | Neotropical | --              | -- | -- | -- |
| <i>A. cooperii</i>         | Occasional | Pair | Nearctic    | [241, 247, 266] | -- | -- | -- |
| <i>A. gundlachi</i>        | Pair       | Pair | Neotropical | [241, 247]      | -- | -- | -- |
| <i>A. bicolor</i>          | Pair       | Pair | Neotropical | --              | -- | -- | -- |

|                                   |             |             |             |                     |    |    |    |
|-----------------------------------|-------------|-------------|-------------|---------------------|----|----|----|
| <i>A. melanoleucus</i>            | Pair        | Pair        | Africa      | [241, 247, 257]     | -- | -- | -- |
| <i>A. henstii</i>                 | Pair        | Pair        | Africa      | [241, 247]          | -- | -- | -- |
| <i>A. gentilis</i>                | Pair        | Pair        | Holarctic   | --                  | -- | -- | -- |
| <i>A. meyerianus</i>              | Pair        | Pair        | Australia   | --                  | -- | -- | -- |
| <i>Erythrotriorchis buergersi</i> | Unknown     | Pair        | Australia   | --                  | -- | -- | -- |
| <i>E. radiatus</i>                | Pair        | Pair        | Australia   | --                  | -- | -- | -- |
| <i>Megatriorchis doriae</i>       | Unknown     | Pair        | Australia   | --                  | -- | -- | -- |
| <i>Urotriorchis macrourus</i>     | Unknown     | Pair        | Africa      | --                  | -- | -- | -- |
| <i>Butastur rufipennis</i>        | Pair        | Pair        | Africa      | --                  | -- | -- | -- |
| <i>B. teesa</i>                   | Pair        | Pair        | Indomalayan | --                  | -- | -- | -- |
| <i>B. liventer</i>                | Unknown     | Pair        | Indomalayan | --                  | -- | -- | -- |
| <i>B. indicus</i>                 | Pair        | Pair        | Palaearctic | --                  | -- | -- | -- |
| <i>Geranoospiza caerulescens</i>  | Pair        | Pair        | Neotropical | --                  | -- | -- | -- |
| <i>Leucopternis plumbea</i>       | Unknown     | Pair        | Neotropical | --                  | -- | -- | -- |
| <i>L. schistacea</i>              | Unknown     | Pair        | Neotropical | --                  | -- | -- | -- |
| <i>L. princeps</i>                | Unknown     | Pair        | Neotropical | --                  | -- | -- | -- |
| <i>L. melanops</i>                | Unknown     | Pair        | Neotropical | --                  | -- | -- | -- |
| <i>L. kuhli</i>                   | Unknown     | Pair        | Neotropical | --                  | -- | -- | -- |
| <i>L. lacernulata</i>             | Unknown     | Pair        | Neotropical | --                  | -- | -- | -- |
| <i>L. semiplumbea</i>             | Unknown     | Pair        | Neotropical | --                  | -- | -- | -- |
| <i>L. albicollis</i>              | Unknown     | Pair        | Neotropical | --                  | -- | -- | -- |
| <i>L. occidentalis</i>            | Unknown     | Pair        | Neotropical | --                  | -- | -- | -- |
| <i>L. polionota</i>               | Unknown     | Pair        | Neotropical | --                  | -- | -- | -- |
| <i>Buteogallus aequinoctialis</i> | Pair        | Pair        | Neotropical | --                  | -- | -- | -- |
| <i>B. anthracinus</i>             | Pair        | Pair        | Neotropical | --                  | -- | -- | -- |
| <i>B. subtilis</i>                | Unknown     | Pair        | Neotropical | --                  | -- | -- | -- |
| <i>B. urubitinga</i>              | Pair        | Pair        | Neotropical | --                  | -- | -- | -- |
| <i>B. meridionalis</i>            | Pair        | Pair        | Neotropical | --                  | -- | -- | -- |
| <i>Parabuteo unicinctus</i>       | Cooperation | Cooperation | Neotropical | [241, 247, 267-269] | -- | -- | -- |
| <i>Busarellus nigricollis</i>     | Unknown     | Pair        | Neotropical | [241, 247]          | -- | -- | -- |
| <i>Geranoaetus melanoleucus</i>   | Pair        | Pair        | Neotropical | [241, 247, 270]     | -- | -- | -- |
| <i>Harpyhaliaetus solitarius</i>  | Unknown     | Pair        | Neotropical | [241, 247]          | -- | -- | -- |
| <i>H. coronatus</i>               | Unknown     | Cooperation | Neotropical | --                  | -- | -- | -- |
| <i>Asturina plagiata</i>          | Subspp      | Subspp      | Neotropical | --                  | -- | -- | -- |
| <i>A. nitida</i>                  | Pair        | Pair        | Neotropical | --                  | -- | -- | -- |
| <i>Buteo magnirostris</i>         | Pair        | Pair        | Neotropical | --                  | -- | -- | -- |
| <i>B. lineatus</i>                | Occasional  | Pair        | Nearctic    | [241, 246, 247]     | -- | -- | -- |
| <i>B. ridgwayi</i>                | Pair        | Pair        | Neotropical | [241, 247]          | -- | -- | -- |
| <i>B. platypterus</i>             | Pair        | Pair        | Nearctic    | --                  | -- | -- | -- |
| <i>B. leucorrhous</i>             | Unknown     | Pair        | Neotropical | --                  | -- | -- | -- |
| <i>B. brachyurus</i>              | Pair        | Pair        | Neotropical | --                  | -- | -- | -- |
| <i>B. albigula</i>                | Unknown     | Pair        | Neotropical | --                  | -- | -- | -- |
| <i>B. swainsoni</i>               | Cooperation | Cooperation | Nearctic    | [241, 247, 271]     | -- | -- | -- |

|                                |             |             |             |                      |    |    |    |
|--------------------------------|-------------|-------------|-------------|----------------------|----|----|----|
| <i>B. albicaudatus</i>         | Pair        | Pair        | Neotropical | [241, 247]           | -- | -- | -- |
| <i>B. galapagoensis</i>        | Cooperation | Cooperation | Neotropical | [241, 247, 272, 273] | -- | -- | -- |
| <i>B. polyosoma</i>            | Pair        | Pair        | Neotropical | [241, 247]           | -- | -- | -- |
| <i>B. poecilochrous</i>        | Cooperation | Cooperation | Neotropical | [241, 246, 247]      | -- | -- | -- |
| <i>B. albonotatus</i>          | Pair        | Pair        | Neotropical | [241, 247]           | -- | -- | -- |
| <i>B. solitarius</i>           | Pair        | Pair        | Neotropical | --                   | -- | -- | -- |
| <i>B. jamaicensis</i>          | Occasional  | Pair        | Nearctic    | --                   | -- | -- | -- |
| <i>B. ventralis</i>            | Unknown     | Pair        | Neotropical | --                   | -- | -- | -- |
| <i>B. buteo</i>                | Pair        | Pair        | Palaearctic | --                   | -- | -- | -- |
| <i>B. oreophilus</i>           | Pair        | Pair        | Africa      | [241, 247, 257]      | -- | -- | -- |
| <i>B. brachypterus</i>         | Pair        | Pair        | Africa      | [241, 247]           | -- | -- | -- |
| <i>B. rufinus</i>              | Pair        | Pair        | Palaearctic | --                   | -- | -- | -- |
| <i>B. hemilasius</i>           | Pair        | Pair        | Palaearctic | --                   | -- | -- | -- |
| <i>B. regalis</i>              | Occasional  | Pair        | Nearctic    | [241, 246, 247]      | -- | -- | -- |
| <i>B. lagopus</i>              | Pair        | Pair        | Holarctic   | [241, 247]           | -- | -- | -- |
| <i>B. auguralis</i>            | Pair        | Pair        | Africa      | [241, 247, 257]      | -- | -- | -- |
| <i>B. augur</i>                | Occasional  | Pair        | Africa      | [241, 246, 247]      | -- | -- | -- |
| <i>B. archeri</i>              | Subspp      | Subspp      | Africa      | [241, 247]           | -- | -- | -- |
| <i>B. rufofuscus</i>           | Cooperation | Cooperation | Africa      | [241, 247, 257, 274] | -- | -- | -- |
| <i>Morphnus guianensis</i>     | Pair        | Pair        | Neotropical | [241, 247]           | -- | -- | -- |
| <i>Harpia harpyja</i>          | Pair        | Pair        | Neotropical | --                   | -- | -- | -- |
| <i>Harpyopsis novaeguineae</i> | Unknown     | Pair        | Australia   | --                   | -- | -- | -- |
| <i>Pithecophaga jefferyi</i>   | Pair        | Pair        | Indomalayan | --                   | -- | -- | -- |
| <i>Ictinaetus malayensis</i>   | Pair        | Pair        | Indomalayan | --                   | -- | -- | -- |
| <i>Aquila pomarina</i>         | Occasional  | Pair        | Widespread  | --                   | -- | -- | -- |
| <i>A. clanga</i>               | Pair        | Pair        | Palaearctic | --                   | -- | -- | -- |
| <i>A. rapax</i>                | Pair        | Pair        | Widespread  | [241, 247, 257]      | -- | -- | -- |
| <i>A. nipalensis</i>           | Pair        | Pair        | Palaearctic | [241, 247]           | -- | -- | -- |
| <i>A. adalberti</i>            | Pair        | Pair        | Palaearctic | --                   | -- | -- | -- |
| <i>A. heliaca</i>              | Pair        | Pair        | Palaearctic | --                   | -- | -- | -- |
| <i>A. gurneyi</i>              | Unknown     | Pair        | Australia   | --                   | -- | -- | -- |
| <i>A. chrysaetos</i>           | Occasional  | Pair        | Holarctic   | [241, 247, 275, 276] | -- | -- | -- |
| <i>A. audax</i>                | Pair        | Pair        | Australia   | [241, 247]           | -- | -- | -- |
| <i>A. verreauxii</i>           | Pair        | Pair        | Africa      | [241, 247, 257]      | -- | -- | -- |
| <i>A. wahlbergi</i>            | Pair        | Pair        | Africa      | --                   | -- | -- | -- |
| <i>Hieraaetus fasciatus</i>    | Occasional  | Pair        | Widespread  | [241, 247, 277]      | -- | -- | -- |
| <i>H. spilogaster</i>          | Pair        | Pair        | Africa      | [241, 247, 257]      | -- | -- | -- |
| <i>H. pennatus</i>             | Pair        | Pair        | Widespread  | [241, 247]           | -- | -- | -- |
| <i>H. morphnoides</i>          | Pair        | Pair        | Australia   | --                   | -- | -- | -- |
| <i>H. ayresii</i>              | Pair        | Pair        | Africa      | [241, 247, 257]      | -- | -- | -- |
| <i>H. kienerii</i>             | Pair        | Pair        | Indomalayan | [241, 247]           | -- | -- | -- |
| <i>Polemaetus bellicosus</i>   | Pair        | Pair        | Africa      | [241, 247, 257]      | -- | -- | -- |
| <i>Spizastur melanoleucus</i>  | Unknown     | Pair        | Neotropical | [241, 247]           | -- | -- | -- |

|                                  |             |             |             |                      |          |     |         |
|----------------------------------|-------------|-------------|-------------|----------------------|----------|-----|---------|
| <i>Lophaetus occipitalis</i>     | Pair        | Pair        | Africa      | [241, 247, 257]      | --       | --  | --      |
| <i>Spizaetus africanus</i>       | Unknown     | Pair        | Africa      | [241, 247]           | --       | --  | --      |
| <i>S. cirrhatus</i>              | Pair        | Pair        | Indomalayan | --                   | --       | --  | --      |
| <i>S. nipalensis</i>             | Pair        | Pair        | Widespread  | --                   | --       | --  | --      |
| <i>S. alboniger</i>              | Unknown     | Pair        | Indomalayan | --                   | --       | --  | --      |
| <i>S. bartelsi</i>               | Cooperation | Cooperation | Indomalayan | [241, 246, 247]      | --       | --  | --      |
| <i>S. lanceolatus</i>            | Unknown     | Pair        | Indomalayan | [241, 247]           | --       | --  | --      |
| <i>S. philippensis</i>           | Unknown     | Pair        | Indomalayan | --                   | --       | --  | --      |
| <i>S. nanus</i>                  | Unknown     | Pair        | Indomalayan | --                   | --       | --  | --      |
| <i>S. tyrannus</i>               | Pair        | Pair        | Neotropical | --                   | --       | --  | --      |
| <i>S. ornatus</i>                | Pair        | Pair        | Neotropical | --                   | --       | --  | --      |
| <i>Stephanoaetus coronatus</i>   | Pair        | Pair        | Africa      | [241, 247, 257]      | --       | --  | --      |
| <i>Oroaetus isidori</i>          | Unknown     | Pair        | Neotropical | [241, 247]           | --       | --  | --      |
| <b>Falconides: Sagittariidae</b> |             |             |             |                      |          |     |         |
| <i>Sagittarius serpentarius</i>  | Pair        | Pair        | Africa      | [278]                | bbdabaab | [3] |         |
| <b>Falconides: Falconidae</b>    |             |             |             |                      |          |     |         |
| <i>Herpetotheres cachinnans</i>  | Pair        | Pair        | Neotropical | [241, 279]           | bbdabab  | [3] | a [280] |
| <i>Micrastur ruficollis</i>      | Pair        | Pair        | Neotropical | --                   | --       | --  | --      |
| <i>M. plumbeus</i>               | Unknown     | Pair        | Neotropical | --                   | --       | --  | --      |
| <i>M. gilvicollis</i>            | Unknown     | Pair        | Neotropical | --                   | --       | --  | --      |
| <i>M. mirandollei</i>            | Unknown     | Pair        | Neotropical | --                   | --       | --  | --      |
| <i>M. semitorquatus</i>          | Unknown     | Pair        | Neotropical | --                   | --       | --  | --      |
| <i>M. buckleyi</i>               | Unknown     | Pair        | Neotropical | --                   | --       | --  | --      |
| <i>Microhierax caerulescens</i>  | Cooperation | Cooperation | Indomalayan | [241, 279, 281]      | --       | --  | baa     |
| <i>M. fringillarius</i>          | Suspected   | Cooperation | Indomalayan | [241, 279]           | --       | --  | --      |
| <i>M. latifrons</i>              | Unknown     | Cooperation | Indomalayan | --                   | --       | --  | --      |
| <i>M. erythrognys</i>            | Unknown     | Cooperation | Indomalayan | --                   | --       | --  | --      |
| <i>M. melanoleucus</i>           | Unknown     | Cooperation | Indomalayan | --                   | --       | --  | --      |
| <i>Polihierax semitorquatus</i>  | Cooperation | Cooperation | Africa      | [241, 279, 282, 283] | --       | --  | baba    |
| <i>P. insignis</i>               | Unknown     | Cooperation | Indomalayan | [241, 279]           | --       | --  | --      |
| <i>Falco berigora</i>            | Pair        | Pair        | Australia   | --                   | --       | --  | babb    |
| <i>F. naumanni</i>               | Occasional  | Pair        | Paleartic   | [241, 279, 284]      | --       | --  | --      |
| <i>F. tinnunculus</i>            | Occasional  | Pair        | Widespread  | [241, 279, 285, 286] | --       | --  | --      |
| <i>F. newtoni</i>                | Unknown     | Pair        | Africa      | [241, 279]           | --       | --  | --      |
| <i>F. punctatus</i>              | Pair        | Pair        | Africa      | --                   | --       | --  | --      |
| <i>F. araea</i>                  | Pair        | Pair        | Africa      | --                   | --       | --  | --      |
| <i>F. moluccensis</i>            | Unknown     | Pair        | Indomalayan | --                   | --       | --  | --      |
| <i>F. cenchroides</i>            | Pair        | Pair        | Australia   | --                   | --       | --  | --      |
| <i>F. sparverius</i>             | Occasional  | Pair        | Widespread  | [241, 246, 247]      | --       | --  | --      |
| <i>F. rupicoloides</i>           | Pair        | Pair        | Africa      | [241, 257, 279]      | --       | --  | --      |
| <i>F. alopex</i>                 | Pair        | Pair        | Africa      | --                   | --       | --  | --      |
| <i>F. ardosiaceus</i>            | Pair        | Pair        | Africa      | --                   | --       | --  | --      |
| <i>F. dickinsoni</i>             | Pair        | Pair        | Africa      | --                   | --       | --  | --      |

|                                    |             |             |             |                      |         |          |     |    |
|------------------------------------|-------------|-------------|-------------|----------------------|---------|----------|-----|----|
| <i>F. zoniventris</i>              | Pair        | Pair        | Africa      | [241, 279]           | --      | --       | --  | -- |
| <i>F. chicquera</i>                | Pair        | Pair        | Widespread  | [241, 257, 279]      | --      | --       | --  | -- |
| <i>F. vespertinus</i>              | Pair        | Pair        | Palaearctic | [241, 279]           | --      | --       | --  | -- |
| <i>F. amurensis</i>                | Pair        | Pair        | Palaearctic | --                   | --      | --       | --  | -- |
| <i>F. eleonora</i>                 | Pair        | Pair        | Palaearctic | --                   | --      | --       | --  | -- |
| <i>F. concolor</i>                 | Pair        | Pair        | Palaearctic | --                   | --      | --       | --  | -- |
| <i>F. femoralis</i>                | Pair        | Pair        | Neotropical | --                   | --      | --       | --  | -- |
| <i>F. columbarius</i>              | Cooperation | Cooperation | Holarctic   | [241, 279, 287, 288] | --      | --       | --  | -- |
| <i>F. rufigularis</i>              | Pair        | Pair        | Neotropical | [241, 279]           | --      | --       | --  | -- |
| <i>F. subbuteo</i>                 | Occasional  | Pair        | Palaearctic | [241, 246, 247, 289] | --      | --       | --  | -- |
| <i>F. cuvierii</i>                 | Pair        | Pair        | Africa      | [241, 279]           | --      | --       | --  | -- |
| <i>F. severus</i>                  | Pair        | Pair        | Widespread  | --                   | --      | --       | --  | -- |
| <i>F. longipennis</i>              | Pair        | Pair        | Australia   | --                   | --      | --       | --  | -- |
| <i>F. novaeseelandiae</i>          | Pair        | Pair        | Australia   | --                   | --      | --       | --  | -- |
| <i>F. hypoleucos</i>               | Pair        | Pair        | Australia   | --                   | --      | --       | --  | -- |
| <i>F. subniger</i>                 | Pair        | Pair        | Australia   | --                   | --      | --       | --  | -- |
| <i>F. biarmicus</i>                | Occasional  | Pair        | Widespread  | --                   | --      | --       | --  | -- |
| <i>F. jugger</i>                   | Pair        | Pair        | Indomalayan | --                   | --      | --       | --  | -- |
| <i>F. cherrug</i>                  | Pair        | Pair        | Palaearctic | --                   | --      | --       | --  | -- |
| <i>F. rusticolus</i>               | Pair        | Pair        | Holarctic   | --                   | --      | --       | --  | -- |
| <i>F. mexicanus</i>                | Occasional  | Pair        | Nearctic    | [290]                | --      | --       | --  | -- |
| <i>F. peregrinus</i>               | Cooperation | Cooperation | Widespread  | [241, 279, 291-293]  | --      | --       | --  | -- |
| <i>F. pelegrinoides</i>            | Pair        | Pair        | Palaearctic | [241, 279]           | --      | --       | --  | -- |
| <i>F. deiroleucus</i>              | Pair        | Pair        | Neotropical | --                   | --      | --       | --  | -- |
| <i>F. fasciinucha</i>              | Pair        | Pair        | Africa      | [241, 257, 279]      | --      | --       | --  | -- |
| <i>Spiziapteryx circumcinctus</i>  | Unknown     | Pair        | Neotropical | [241, 279]           | --      | --       | bba | -- |
| <i>Daptrius ater</i>               | Unknown     | Cooperation | Neotropical | --                   | --      | --       | bbb | -- |
| <i>Ibycter americanus</i>          | Cooperation | Cooperation | Neotropical | [241, 279, 294]      | --      | --       | --  | -- |
| <i>Phalcoboenus carunculatus</i>   | Unknown     | Cooperation | Neotropical | [241, 279]           | --      | --       | --  | -- |
| <i>P. megalopterus</i>             | Unknown     | Cooperation | Neotropical | [241, 279, 295]      | --      | --       | --  | -- |
| <i>P. albogularis</i>              | Unknown     | Cooperation | Neotropical | [241, 279]           | --      | --       | --  | -- |
| <i>P. australis</i>                | Cooperation | Cooperation | Neotropical | [241, 246, 247]      | --      | --       | --  | -- |
| <i>Caracara lutosus</i>            | Subspp      | Subspp      | Neotropical | [241, 279]           | --      | --       | --  | -- |
| <i>C. plancus</i>                  | Unknown     | Pair        | Neotropical | --                   | --      | --       | --  | -- |
| <i>Milvago chimachima</i>          | Unknown     | Pair        | Neotropical | --                   | --      | --       | --  | -- |
| <i>M. chimango</i>                 | Pair        | Pair        | Neotropical | --                   | --      | --       | --  | -- |
| <b>Podicipedida: Podicipedidae</b> |             |             |             |                      |         |          |     |    |
| <i>Rollandia rolland</i>           | Occasional  | Pair        | Neotropical | [296]                | bbdabba | [3, 136] | --  | -- |
| <i>R. microptera</i>               | Occasional  | Pair        | Neotropical | --                   | --      | --       | --  | -- |
| <i>Tachybaptus ruficollis</i>      | Occasional  | Pair        | Widespread  | --                   | --      | --       | --  | -- |
| <i>T. novaehollandiae</i>          | Occasional  | Pair        | Australia   | [22, 296, 297]       | --      | --       | --  | -- |
| <i>T. pelzelinii</i>               | Pair        | Pair        | Africa      | [296]                | --      | --       | --  | -- |
| <i>T. dominicus</i>                | Pair        | Pair        | Neotropical | --                   | --      | --       | --  | -- |

|                                     |            |        |             |                    |             |          |
|-------------------------------------|------------|--------|-------------|--------------------|-------------|----------|
| <i>Podilymbus podiceps</i>          | Occasional | Pair   | Widespread  | [296, 298, 299]    | --          | --       |
| <i>P. gigas</i>                     | Pair       | Pair   | Neotropical | [296]              | --          | --       |
| <i>Poliiocephalus poliocephalus</i> | Pair       | Pair   | Australia   | --                 | --          | --       |
| <i>P. rufopectus</i>                | Occasional | Pair   | Australia   | [22, 296]          | --          | --       |
| <i>Podiceps major</i>               | Pair       | Pair   | Neotropical | [296]              | --          | --       |
| <i>P. griseogen</i>                 | Pair       | Pair   | Holarctic   | [296, 300]         | --          | --       |
| <i>P. cristatus</i>                 | Occasional | Pair   | Widespread  | [33, 296, 301-304] | --          | --       |
| <i>P. auritus</i>                   | Occasional | Pair   | Widespread  | [296, 305]         | --          | --       |
| <i>P. nigricollis</i>               | Pair       | Pair   | Widespread  | [296, 306]         | --          | --       |
| <i>P. occipitalis</i>               | Pair       | Pair   | Neotropical | [296]              | --          | --       |
| <i>P. taczanowskii</i>              | Pair       | Pair   | Neotropical | --                 | --          | --       |
| <i>P. gallardoi</i>                 | Pair       | Pair   | Neotropical | --                 | --          | --       |
| <i>Aechmophorus occidentalis</i>    | Occasional | Pair   | Nearctic    | [296, 307]         | --          | --       |
| <i>A. clarkii</i>                   | Pair       | Pair   | Nearctic    | --                 | --          | --       |
| <b>Phaethontida: Phaethontidae</b>  |            |        |             |                    |             |          |
| <i>Phaethon aethereus</i>           | Pair       | Pair   | Widespread  | [308]              | bbdabbba    | [3, 136] |
| <i>P. rubricauda</i>                | Pair       | Pair   | Widespread  | --                 | --          | --       |
| <i>P. lepturus</i>                  | Pair       | Pair   | Widespread  | --                 | --          | --       |
| <b>Sulida: Sulidae</b>              |            |        |             |                    |             |          |
| <i>Papasula abbotti</i>             | Pair       | Pair   | Indomalayan | [309]              | bbdabbbbaaa | [3]      |
| <i>Morus bassanus</i>               | Pair       | Pair   | Widespread  | --                 | --          | --       |
| <i>M. capensis</i>                  | Pair       | Pair   | Africa      | --                 | --          | --       |
| <i>M. serrator</i>                  | Pair       | Pair   | Australia   | --                 | --          | --       |
| <i>Sula neboxii</i>                 | Pair       | Pair   | Neotropical | --                 | --          | --       |
| <i>S. variegata</i>                 | Pair       | Pair   | Neotropical | --                 | --          | --       |
| <i>S. dactylatra</i>                | Pair       | Pair   | Widespread  | --                 | --          | --       |
| <i>S. sula</i>                      | Pair       | Pair   | Widespread  | --                 | --          | --       |
| <i>S. leucogaster</i>               | Pair       | Pair   | Widespread  | --                 | --          | --       |
| <b>Sulida: Anhingidae</b>           |            |        |             |                    |             |          |
| <i>Anhinga anhinga</i>              | Pair       | Pair   | Widespread  | [310]              | bbdabbbbaab | [3]      |
| <i>A. rufa</i>                      | Pair       | Pair   | Africa      | [311]              | --          | --       |
| <i>A. melanogaster</i>              | Subspp     | Subspp | Indomalayan | [310]              | --          | --       |
| <i>A. novaehollandiae</i>           | Pair       | Pair   | Australia   | [22]               | --          | --       |
| <b>Sulida: Phalacrocoracidae</b>    |            |        |             |                    |             |          |
| <i>Phalacrocorax africanus</i>      | Pair       | Pair   | Africa      | [312]              | bbdabbbbab  | [3]      |
| <i>P. coronatus</i>                 | Pair       | Pair   | Africa      | --                 | --          | --       |
| <i>P. pygmeus</i>                   | Pair       | Pair   | Paleartic   | --                 | --          | --       |
| <i>P. niger</i>                     | Pair       | Pair   | Indomalayan | --                 | --          | --       |
| <i>P. melanoleucos</i>              | Pair       | Pair   | Australia   | [22]               | --          | --       |
| <i>P. penicillatus</i>              | Pair       | Pair   | Nearctic    | [312]              | --          | --       |
| <i>P. harrisi</i>                   | Pair       | Pair   | Neotropical | --                 | --          | --       |
| <i>P. neglectus</i>                 | Pair       | Pair   | Africa      | --                 | --          | --       |
| <i>P. fuscescens</i>                | Pair       | Pair   | Australia   | [22]               | --          | --       |

|                           |            |      |             |            |    |    |
|---------------------------|------------|------|-------------|------------|----|----|
| <i>P. brasilianus</i>     | Pair       | Pair | Neotropical | [312]      | -- | -- |
| <i>P. auritus</i>         | Pair       | Pair | Nearctic    | --         | -- | -- |
| <i>P. fuscicollis</i>     | Pair       | Pair | Indomalayan | --         | -- | -- |
| <i>P. varius</i>          | Pair       | Pair | Australia   | [22]       | -- | -- |
| <i>P. sulcirostris</i>    | Pair       | Pair | Australia   | --         | -- | -- |
| <i>P. carbo</i>           | Pair       | Pair | Widespread  | [312]      | -- | -- |
| <i>P. capillatus</i>      | Pair       | Pair | Palaearctic | --         | -- | -- |
| <i>P. nigrogularis</i>    | Pair       | Pair | Palaearctic | --         | -- | -- |
| <i>P. capensis</i>        | Pair       | Pair | Africa      | --         | -- | -- |
| <i>P. bougainvillii</i>   | Pair       | Pair | Neotropical | --         | -- | -- |
| <i>P. verrucosus</i>      | Pair       | Pair | Antarctic   | [22]       | -- | -- |
| <i>P. atriceps</i>        | Pair       | Pair | Neotropical | [312]      | -- | -- |
| <i>P. bransfieldensis</i> | Pair       | Pair | Antarctic   | [22]       | -- | -- |
| <i>P. georgianus</i>      | Pair       | Pair | Antarctic   | --         | -- | -- |
| <i>P. campbelli</i>       | Pair       | Pair | Antarctic   | --         | -- | -- |
| <i>P. carunculatus</i>    | Pair       | Pair | Australia   | --         | -- | -- |
| <i>P. chalconotus</i>     | Pair       | Pair | Australia   | --         | -- | -- |
| <i>P. onslowi</i>         | Pair       | Pair | Australia   | --         | -- | -- |
| <i>P. colensoi</i>        | Pair       | Pair | Antarctic   | --         | -- | -- |
| <i>P. ranfurlyi</i>       | Pair       | Pair | Australia   | --         | -- | -- |
| <i>P. magellanicus</i>    | Pair       | Pair | Neotropical | [312]      | -- | -- |
| <i>P. urile</i>           | Pair       | Pair | Holarctic   | --         | -- | -- |
| <i>P. pelagicus</i>       | Occasional | Pair | Holarctic   | [312, 313] | -- | -- |
| <i>P. aristotelis</i>     | Pair       | Pair | Palaearctic | [312]      | -- | -- |
| <i>P. gaimardi</i>        | Pair       | Pair | Neotropical | --         | -- | -- |
| <i>P. punctatus</i>       | Pair       | Pair | Australia   | [22]       | -- | -- |
| <i>P. featherstoni</i>    | Pair       | Pair | Antarctic   | --         | -- | -- |

**Ciconiida: Ardeidae**

|                            |         |      |             |       |           |     |    |       |
|----------------------------|---------|------|-------------|-------|-----------|-----|----|-------|
| <i>Ardea cinerea</i>       | Pair    | Pair | Widespread  | [314] | bbdabbbba | [3] | aa | [314] |
| <i>A. herodias</i>         | Pair    | Pair | Widespread  | --    | --        | --  | -- | --    |
| <i>A. cocoi</i>            | Pair    | Pair | Neotropical | --    | --        | --  | -- | --    |
| <i>A. pacifica</i>         | Pair    | Pair | Australia   | --    | --        | --  | -- | --    |
| <i>A. alba</i>             | Pair    | Pair | Widespread  | --    | --        | --  | -- | --    |
| <i>A. modesta</i>          | Pair    | Pair | Widespread  | --    | --        | --  | -- | --    |
| <i>A. intermedia</i>       | Pair    | Pair | Widespread  | --    | --        | --  | -- | --    |
| <i>A. melanocephala</i>    | Pair    | Pair | Africa      | --    | --        | --  | -- | --    |
| <i>A. humbloti</i>         | Unknown | Pair | Africa      | --    | --        | --  | -- | --    |
| <i>A. insignis</i>         | Unknown | Pair | Indomalayan | --    | --        | --  | -- | --    |
| <i>A. sumatrana</i>        | Pair    | Pair | Widespread  | --    | --        | --  | -- | --    |
| <i>A. goliath</i>          | Pair    | Pair | Widespread  | --    | --        | --  | -- | --    |
| <i>A. purpurea</i>         | Pair    | Pair | Widespread  | --    | --        | --  | -- | --    |
| <i>A. ibis</i>             | Pair    | Pair | Widespread  | --    | --        | --  | -- | --    |
| <i>Butorides virescens</i> | Pair    | Pair | Nearctic    | --    | --        | --  | -- | --    |



|                              |             |             |             |    |    |    |    |    |
|------------------------------|-------------|-------------|-------------|----|----|----|----|----|
| <i>B. sundevalli</i>         | Subspp      | Subspp      | Neotropical | -- | -- | -- | -- | -- |
| <i>B. striatus</i>           | Pair        | Pair        | Widespread  | -- | -- | -- | -- | -- |
| <i>Ardeola ralloides</i>     | Pair        | Pair        | Widespread  | -- | -- | -- | -- | -- |
| <i>A. grayii</i>             | Pair        | Pair        | Indomalayan | -- | -- | -- | -- | -- |
| <i>A. bacchus</i>            | Pair        | Pair        | Widespread  | -- | -- | -- | -- | -- |
| <i>A. speciosa</i>           | Pair        | Pair        | Indomalayan | -- | -- | -- | -- | -- |
| <i>A. idae</i>               | Pair        | Pair        | Africa      | -- | -- | -- | -- | -- |
| <i>A. rufiventris</i>        | Pair        | Pair        | Africa      | -- | -- | -- | -- | -- |
| <i>Egretta rufescens</i>     | Pair        | Pair        | Neotropical | -- | -- | -- | ab | -- |
| <i>E. picata</i>             | Pair        | Pair        | Australia   | -- | -- | -- | -- | -- |
| <i>E. vinaceigula</i>        | Pair        | Pair        | Africa      | -- | -- | -- | -- | -- |
| <i>E. ardesiaca</i>          | Pair        | Pair        | Africa      | -- | -- | -- | -- | -- |
| <i>E. tricolor</i>           | Pair        | Pair        | Neotropical | -- | -- | -- | -- | -- |
| <i>E. novaehollandiae</i>    | Pair        | Pair        | Australia   | -- | -- | -- | -- | -- |
| <i>E. caerulea</i>           | Pair        | Pair        | Neotropical | -- | -- | -- | -- | -- |
| <i>E. thula</i>              | Pair        | Pair        | Neotropical | -- | -- | -- | -- | -- |
| <i>E. garzetta</i>           | Pair        | Pair        | Widespread  | -- | -- | -- | -- | -- |
| <i>E. eulophotes</i>         | Pair        | Pair        | Palaearctic | -- | -- | -- | -- | -- |
| <i>E. gularis</i>            | Subspp      | Subspp      | Africa      | -- | -- | -- | -- | -- |
| <i>E. dimorpha</i>           | Subspp      | Subspp      | Africa      | -- | -- | -- | -- | -- |
| <i>E. sacra</i>              | Pair        | Pair        | Widespread  | -- | -- | -- | -- | -- |
| <i>Syrigma sibilatrix</i>    | Pair        | Pair        | Neotropical | -- | -- | -- | -- | -- |
| <i>Pilherodius pileatus</i>  | Unknown     | Pair        | Neotropical | -- | -- | -- | -- | -- |
| <i>Nyctanassa violacea</i>   | Pair        | Pair        | Widespread  | -- | -- | -- | -- | -- |
| <i>Nycticorax nycticorax</i> | Pair        | Pair        | Widespread  | -- | -- | -- | ac | -- |
| <i>N. caledonicus</i>        | Pair        | Pair        | Australia   | -- | -- | -- | -- | -- |
| <i>N. leuconotus</i>         | Pair        | Pair        | Africa      | -- | -- | -- | -- | -- |
| <i>Gorsachius magnificus</i> | Unknown     | Pair        | Palaearctic | -- | -- | -- | -- | -- |
| <i>G. goisagi</i>            | Pair        | Pair        | Palaearctic | -- | -- | -- | -- | -- |
| <i>G. melanolophus</i>       | Pair        | Pair        | Indomalayan | -- | -- | -- | -- | -- |
| <i>Botaurus pinnatus</i>     | Female only | Female only | Neotropical | -- | -- | -- | b  | -- |
| <i>B. lentiginosus</i>       | Female only | Female only | Nearctic    | -- | -- | -- | -- | -- |
| <i>B. stellaris</i>          | Female only | Female only | Widespread  | -- | -- | -- | -- | -- |
| <i>B. poiciloptilus</i>      | Female only | Female only | Australia   | -- | -- | -- | -- | -- |
| <i>Ixobrychus involucris</i> | Unknown     | Pair        | Neotropical | -- | -- | -- | -- | -- |
| <i>I. exilis</i>             | Pair        | Pair        | Widespread  | -- | -- | -- | -- | -- |
| <i>I. minutus</i>            | Pair        | Pair        | Widespread  | -- | -- | -- | -- | -- |
| <i>I. novaezelandiae</i>     | Subspp      | Subspp      | Australia   | -- | -- | -- | -- | -- |
| <i>I. sinensis</i>           | Pair        | Pair        | Widespread  | -- | -- | -- | -- | -- |
| <i>I. eurhythmus</i>         | Pair        | Pair        | Palaearctic | -- | -- | -- | -- | -- |
| <i>I. cinnamomeus</i>        | Pair        | Pair        | Indomalayan | -- | -- | -- | -- | -- |
| <i>I. sturmii</i>            | Pair        | Pair        | Africa      | -- | -- | -- | -- | -- |
| <i>Dupetor flavicollis</i>   | Pair        | Pair        | Widespread  | -- | -- | -- | -- | -- |

|                                     |             |             |             |            |              |          |    |    |
|-------------------------------------|-------------|-------------|-------------|------------|--------------|----------|----|----|
| <i>Zebrilus undulatus</i>           | Pair        | Pair        | Neotropical | --         | --           | --       | -- | -- |
| <i>Tigrisoma mexicanum</i>          | Unknown     | Pair        | Neotropical | --         | --           | --       | c  | -- |
| <i>T. fasciatum</i>                 | Unknown     | Pair        | Neotropical | --         | --           | --       | -- | -- |
| <i>T. lineatum</i>                  | Pair        | Pair        | Neotropical | --         | --           | --       | -- | -- |
| <i>Zonerodius heliosylus</i>        | Unknown     | Pair        | Australia   | --         | --           | --       | -- | -- |
| <i>Tigriornis leucolophus</i>       | Unknown     | Pair        | Africa      | --         | --           | --       | -- | -- |
| <i>Agamia agami</i>                 | Pair        | Pair        | Neotropical | --         | --           | --       | d  | -- |
| <i>Cochlearius cochlearia</i>       | Pair        | Pair        | Neotropical | --         | --           | --       | e  | -- |
| <b>Ciconiida: Scopidae</b>          |             |             |             |            |              |          |    |    |
| <i>Scopus umbretta</i>              | Cooperation | Cooperation | Africa      | [315, 316] | bbdabbbbbbba | [3]      |    |    |
| <b>Ciconiida: Phoenicopteridae</b>  |             |             |             |            |              |          |    |    |
| <i>Phoenicopiterus ruber</i>        | Pair        | Pair        | Widespread  | [317]      | bbdabbbbbbba | [3, 136] |    |    |
| <i>P. chilensis</i>                 | Pair        | Pair        | Neotropical | --         | --           | --       |    |    |
| <i>P. minor</i>                     | Pair        | Pair        | Africa      | --         | --           | --       |    |    |
| <i>P. andinus</i>                   | Pair        | Pair        | Neotropical | --         | --           | --       |    |    |
| <i>P. jamesi</i>                    | Pair        | Pair        | Neotropical | --         | --           | --       |    |    |
| <b>Ciconiida: Threskiornithidae</b> |             |             |             |            |              |          |    |    |
| <i>Eudocimus albus</i>              | Pair        | Pair        | Neotropical | [318]      | bbdabbbbbbba | [3]      |    |    |
| <i>E. ruber</i>                     | Pair        | Pair        | Neotropical | --         | --           | --       |    |    |
| <i>Phimosus infuscatus</i>          | Pair        | Pair        | Neotropical | --         | --           | --       |    |    |
| <i>Plegadis falcinellus</i>         | Pair        | Pair        | Widespread  | --         | --           | --       |    |    |
| <i>P. chihii</i>                    | Pair        | Pair        | Widespread  | --         | --           | --       |    |    |
| <i>P. ridgwayi</i>                  | Pair        | Pair        | Neotropical | --         | --           | --       |    |    |
| <i>Cercibis oxycerca</i>            | Unknown     | Pair        | Neotropical | --         | --           | --       |    |    |
| <i>Theristicus caerulescens</i>     | Pair        | Pair        | Neotropical | --         | --           | --       |    |    |
| <i>T. caudatus</i>                  | Pair        | Pair        | Neotropical | --         | --           | --       |    |    |
| <i>T. branickii</i>                 | Subspp      | Subspp      | Neotropical | --         | --           | --       |    |    |
| <i>T. melanopis</i>                 | Pair        | Pair        | Neotropical | --         | --           | --       |    |    |
| <i>Mesembrinibis cayennensis</i>    | Pair        | Pair        | Neotropical | --         | --           | --       |    |    |
| <i>Bostrychia hagedash</i>          | Pair        | Pair        | Africa      | --         | --           | --       |    |    |
| <i>B. carunculata</i>               | Pair        | Pair        | Africa      | --         | --           | --       |    |    |
| <i>B. olivacea</i>                  | Pair        | Pair        | Africa      | --         | --           | --       |    |    |
| <i>B. rara</i>                      | Pair        | Pair        | Africa      | --         | --           | --       |    |    |
| <i>Geronticus eremita</i>           | Pair        | Pair        | Africa      | --         | --           | --       |    |    |
| <i>G. calvus</i>                    | Pair        | Pair        | Africa      | --         | --           | --       |    |    |
| <i>Lophotibis cristata</i>          | Unknown     | Pair        | Africa      | --         | --           | --       |    |    |
| <i>Threskiornis aethiopicus</i>     | Pair        | Pair        | Africa      | --         | --           | --       |    |    |
| <i>T. melanocephalus</i>            | Pair        | Pair        | Indomalayan | --         | --           | --       |    |    |
| <i>T. molucca</i>                   | Pair        | Pair        | Australia   | --         | --           | --       |    |    |
| <i>T. spinicollis</i>               | Pair        | Pair        | Australia   | --         | --           | --       |    |    |
| <i>Pseudibis papillosa</i>          | Pair        | Pair        | Indomalayan | --         | --           | --       |    |    |
| <i>P. davisoni</i>                  | Pair        | Pair        | Indomalayan | --         | --           | --       |    |    |
| <i>P. gigantea</i>                  | Unknown     | Pair        | Indomalayan | --         | --           | --       |    |    |

|                                                 |            |        |             |            |                |     |    |
|-------------------------------------------------|------------|--------|-------------|------------|----------------|-----|----|
| <i>Nipponia nippon</i>                          | Pair       | Pair   | Palaearctic | --         | --             | --  |    |
| <i>Platalea leucorodia</i>                      | Pair       | Pair   | Palaearctic | --         | --             | --  |    |
| <i>P. regia</i>                                 | Pair       | Pair   | Australia   | --         | --             | --  |    |
| <i>P. alba</i>                                  | Pair       | Pair   | Africa      | --         | --             | --  |    |
| <i>P. minor</i>                                 | Pair       | Pair   | Palaearctic | --         | --             | --  |    |
| <i>P. flavipes</i>                              | Pair       | Pair   | Australia   | --         | --             | --  |    |
| <i>Ajaia ajaja</i>                              | Pair       | Pair   | Neotropical | --         | --             | --  |    |
| <b>Ciconiida: Pelicanidae: Balaenicipitinae</b> |            |        |             |            |                |     |    |
| <i>Balaeniceps rex</i>                          | Pair       | Pair   | Africa      | [319]      | bbdabbbbbbbbaa | [3] | a  |
| <b>Ciconiida: Pelicanidae: Pelicaninae</b>      |            |        |             |            |                |     |    |
| <i>Pelecanus onocrotalus</i>                    | Pair       | Pair   | Widespread  | [320]      | bbdabbbbbbbbaa | [3] | b  |
| <i>P. rufescens</i>                             | Pair       | Pair   | Africa      | --         | --             | --  | -- |
| <i>P. crispus</i>                               | Pair       | Pair   | Palaearctic | --         | --             | --  | -- |
| <i>P. philippensis</i>                          | Pair       | Pair   | Indomalayan | --         | --             | --  | -- |
| <i>P. conspicillatus</i>                        | Pair       | Pair   | Australia   | --         | --             | --  | -- |
| <i>P. erythrorhynchos</i>                       | Pair       | Pair   | Nearctic    | --         | --             | --  | -- |
| <i>P. occidentalis</i>                          | Pair       | Pair   | Widespread  | --         | --             | --  | -- |
| <i>P. thagus</i>                                | Subspp     | Subspp | Neotropical | --         | --             | --  | -- |
| <b>Ciconiida: Ciconiidae: Cathartinae</b>       |            |        |             |            |                |     |    |
| <i>Coragyps atratus</i>                         | Group      | Pair   | Neotropical | [321]      | bbdabbbbbbbbab | [3] | a  |
| <i>Cathartes aura</i>                           | Pair       | Pair   | Widespread  | --         | --             | --  | -- |
| <i>C. burrovianus</i>                           | Unknown    | Pair   | Neotropical | --         | --             | --  | -- |
| <i>C. melambrotus</i>                           | Unknown    | Pair   | Neotropical | --         | --             | --  | -- |
| <i>Gymnogyps californianus</i>                  | Pair       | Pair   | Nearctic    | --         | --             | --  | -- |
| <i>Vultur gryphus</i>                           | Pair       | Pair   | Neotropical | --         | --             | --  | -- |
| <i>Sarcoramphus papa</i>                        | Pair       | Pair   | Neotropical | --         | --             | --  | -- |
| <b>Ciconiida: Ciconiidae: Ciconiinae</b>        |            |        |             |            |                |     |    |
| <i>Mycteria americana</i>                       | Pair       | Pair   | Neotropical | [322]      | bbdabbbbbbbbab | [3] | b  |
| <i>M. cinerea</i>                               | Pair       | Pair   | Indomalayan | --         | --             | --  | -- |
| <i>M. ibis</i>                                  | Pair       | Pair   | Africa      | --         | --             | --  | -- |
| <i>M. leucocephala</i>                          | Pair       | Pair   | Indomalayan | --         | --             | --  | -- |
| <i>Anastomus oscitans</i>                       | Occasional | Pair   | Indomalayan | [322, 323] | --             | --  | -- |
| <i>A. lamelligerus</i>                          | Pair       | Pair   | Africa      | [322]      | --             | --  | -- |
| <i>Ciconia nigra</i>                            | Pair       | Pair   | Widespread  | --         | --             | --  | -- |
| <i>C. abdimii</i>                               | Pair       | Pair   | Africa      | --         | --             | --  | -- |
| <i>C. episcopus</i>                             | Pair       | Pair   | Widespread  | --         | --             | --  | -- |
| <i>C. stormi</i>                                | Pair       | Pair   | Indomalayan | --         | --             | --  | -- |
| <i>C. maguari</i>                               | Pair       | Pair   | Neotropical | --         | --             | --  | -- |
| <i>C. ciconia</i>                               | Occasional | Pair   | Palaearctic | --         | --             | --  | -- |
| <i>C. boyciana</i>                              | Pair       | Pair   | Palaearctic | --         | --             | --  | -- |
| <i>Ephippiorhynchus asiaticus</i>               | Pair       | Pair   | Indomalayan | --         | --             | --  | -- |
| <i>E. senegalensis</i>                          | Pair       | Pair   | Africa      | --         | --             | --  | -- |
| <i>Jabiru mycteria</i>                          | Pair       | Pair   | Neotropical | --         | --             | --  | -- |

|                                                  |            |        |             |       |               |     |    |
|--------------------------------------------------|------------|--------|-------------|-------|---------------|-----|----|
| <i>Leptoptilos javanicus</i>                     | Pair       | Pair   | Indomalayan | --    | --            | --  | -- |
| <i>L. crumeniferus</i>                           | Pair       | Pair   | Africa      | --    | --            | --  | -- |
| <i>L. dubius</i>                                 | Pair       | Pair   | Indomalayan | --    | --            | --  | -- |
| <b>Ciconiida: Fregatidae</b>                     |            |        |             |       |               |     |    |
| <i>Fregata magnificens</i>                       | Pair       | Pair   | Widespread  | [324] | bbdabbbbbbbba | [3] |    |
| <i>F. aquila</i>                                 | Pair       | Pair   | Neotropical | --    | --            | --  |    |
| <i>F. minor</i>                                  | Pair       | Pair   | Widespread  | --    | --            | --  |    |
| <i>F. ariel</i>                                  | Pair       | Pair   | Widespread  | --    | --            | --  |    |
| <i>F. andrewsi</i>                               | Pair       | Pair   | Indomalayan | --    | --            | --  |    |
| <b>Ciconiida: Spheniscidae</b>                   |            |        |             |       |               |     |    |
| <i>Aptenodytes patagonicus</i>                   | Pair       | Pair   | Antarctic   | [325] | bbdabbbbbbbba | [3] |    |
| <i>A. forsteri</i>                               | Pair       | Pair   | Antarctic   | --    | --            | --  |    |
| <i>Pygoscelis papua</i>                          | Pair       | Pair   | Antarctic   | --    | --            | --  |    |
| <i>P. adeliae</i>                                | Occasional | Pair   | Antarctic   | [326] | --            | --  |    |
| <i>P. antarctica</i>                             | Pair       | Pair   | Antarctic   | [325] | --            | --  |    |
| <i>Eudyptes chrysocome</i>                       | Pair       | Pair   | Antarctic   | --    | --            | --  |    |
| <i>E. pachyrhynchus</i>                          | Pair       | Pair   | Australia   | --    | --            | --  |    |
| <i>E. robustus</i>                               | Pair       | Pair   | Australia   | --    | --            | --  |    |
| <i>E. sclateri</i>                               | Pair       | Pair   | Australia   | --    | --            | --  |    |
| <i>E. chrysolophus</i>                           | Pair       | Pair   | Widespread  | --    | --            | --  |    |
| <i>E. schlegeli</i>                              | Pair       | Pair   | Antarctic   | --    | --            | --  |    |
| <i>Megadyptes antipodes</i>                      | Pair       | Pair   | Australia   | --    | --            | --  |    |
| <i>Eudyptula minor</i>                           | Pair       | Pair   | Australia   | --    | --            | --  |    |
| <i>Spheniscus demersus</i>                       | Pair       | Pair   | Africa      | --    | --            | --  |    |
| <i>S. humboldti</i>                              | Pair       | Pair   | Neotropical | --    | --            | --  |    |
| <i>S. magellanicus</i>                           | Pair       | Pair   | Neotropical | --    | --            | --  |    |
| <i>S. mendiculus</i>                             | Pair       | Pair   | Neotropical | --    | --            | --  |    |
| <b>Ciconiida: Gaviidae</b>                       |            |        |             |       |               |     |    |
| <i>Gavia stellata</i>                            | Pair       | Pair   | Holarctic   | [327] | bbdabbbbbbbba | [3] |    |
| <i>G. arctica</i>                                | Pair       | Pair   | Holarctic   | --    | --            | --  |    |
| <i>G. pacifica</i>                               | Subspp     | Subspp | Holarctic   | --    | --            | --  |    |
| <i>G. immer</i>                                  | Pair       | Pair   | Nearctic    | --    | --            | --  |    |
| <i>G. adamsii</i>                                | Pair       | Pair   | Holarctic   | --    | --            | --  |    |
| <b>Ciconiida: Procellariidae: Procellariinae</b> |            |        |             |       |               |     |    |
| <i>Macronectes giganteus</i>                     | Pair       | Pair   | Antarctic   | [328] | bbdabbbbbbbba | [3] | a  |
| <i>M. halli</i>                                  | Pair       | Pair   | Antarctic   | --    | --            | --  | -- |
| <i>Fulmarus glacialis</i>                        | Pair       | Pair   | Holarctic   | --    | --            | --  | -- |
| <i>F. glacialisoides</i>                         | Pair       | Pair   | Antarctic   | --    | --            | --  | -- |
| <i>Thalassoica antarctica</i>                    | Pair       | Pair   | Antarctic   | --    | --            | --  | -- |
| <i>Daption capense</i>                           | Pair       | Pair   | Antarctic   | --    | --            | --  | -- |
| <i>Pagodroma nivea</i>                           | Pair       | Pair   | Antarctic   | --    | --            | --  | -- |
| <i>Pterodroma brevirostris</i>                   | Pair       | Pair   | Antarctic   | --    | --            | --  | -- |
| <i>P. aterrima</i>                               | Unknown    | Pair   | Antarctic   | --    | --            | --  | -- |

|                                   |         |        |             |    |    |    |    |    |
|-----------------------------------|---------|--------|-------------|----|----|----|----|----|
| <i>P. becki</i>                   | Subspp  | Subspp | Australia   | -- | -- | -- | -- | -- |
| <i>P. rostrata</i>                | Pair    | Pair   | Australia   | -- | -- | -- | -- | -- |
| <i>P. macgillivrayi</i>           | Unknown | Pair   | Australia   | -- | -- | -- | -- | -- |
| <i>P. axillaris</i>               | Pair    | Pair   | Australia   | -- | -- | -- | -- | -- |
| <i>P. nigripennis</i>             | Pair    | Pair   | Australia   | -- | -- | -- | -- | -- |
| <i>P. cervicalis</i>              | Pair    | Pair   | Australia   | -- | -- | -- | -- | -- |
| <i>P. inexpectata</i>             | Pair    | Pair   | Australia   | -- | -- | -- | -- | -- |
| <i>P. hypoleuca</i>               | Pair    | Pair   | Palaearctic | -- | -- | -- | -- | -- |
| <i>P. leucoptera</i>              | Pair    | Pair   | Australia   | -- | -- | -- | -- | -- |
| <i>P. cookii</i>                  | Pair    | Pair   | Australia   | -- | -- | -- | -- | -- |
| <i>P. pycrofti</i>                | Pair    | Pair   | Australia   | -- | -- | -- | -- | -- |
| <i>P. brevipes</i>                | Subspp  | Subspp | Australia   | -- | -- | -- | -- | -- |
| <i>P. defilippiana</i>            | Pair    | Pair   | Neotropical | -- | -- | -- | -- | -- |
| <i>P. longirostris</i>            | Pair    | Pair   | Neotropical | -- | -- | -- | -- | -- |
| <i>P. alba</i>                    | Pair    | Pair   | Australia   | -- | -- | -- | -- | -- |
| <i>P. arminjoniana</i>            | Pair    | Pair   | Widespread  | -- | -- | -- | -- | -- |
| <i>P. sandwichensis</i>           | Subspp  | Subspp | Australia   | -- | -- | -- | -- | -- |
| <i>P. phaeopygia</i>              | Pair    | Pair   | Neotropical | -- | -- | -- | -- | -- |
| <i>P. neglecta</i>                | Pair    | Pair   | Australia   | -- | -- | -- | -- | -- |
| <i>P. externa</i>                 | Pair    | Pair   | Neotropical | -- | -- | -- | -- | -- |
| <i>P. barau</i>                   | Pair    | Pair   | Africa      | -- | -- | -- | -- | -- |
| <i>P. ultima</i>                  | Pair    | Pair   | Australia   | -- | -- | -- | -- | -- |
| <i>P. solandri</i>                | Pair    | Pair   | Australia   | -- | -- | -- | -- | -- |
| <i>P. macroptera</i>              | Pair    | Pair   | Widespread  | -- | -- | -- | -- | -- |
| <i>P. magentae</i>                | Pair    | Pair   | Australia   | -- | -- | -- | -- | -- |
| <i>P. lessonii</i>                | Pair    | Pair   | Antarctic   | -- | -- | -- | -- | -- |
| <i>P. madeira</i>                 | Pair    | Pair   | Africa      | -- | -- | -- | -- | -- |
| <i>P. feae</i>                    | Pair    | Pair   | Africa      | -- | -- | -- | -- | -- |
| <i>P. mollis</i>                  | Pair    | Pair   | Antarctic   | -- | -- | -- | -- | -- |
| <i>P. incerta</i>                 | Pair    | Pair   | Africa      | -- | -- | -- | -- | -- |
| <i>P. cahow</i>                   | Pair    | Pair   | Nearctic    | -- | -- | -- | -- | -- |
| <i>P. hasitata</i>                | Pair    | Pair   | Neotropical | -- | -- | -- | -- | -- |
| <i>Halobaena caerulea</i>         | Pair    | Pair   | Antarctic   | -- | -- | -- | -- | -- |
| <i>Pachyptila vittata</i>         | Pair    | Pair   | Widespread  | -- | -- | -- | -- | -- |
| <i>P. salvini</i>                 | Pair    | Pair   | Antarctic   | -- | -- | -- | -- | -- |
| <i>P. desolata</i>                | Pair    | Pair   | Antarctic   | -- | -- | -- | -- | -- |
| <i>P. belcheri</i>                | Pair    | Pair   | Antarctic   | -- | -- | -- | -- | -- |
| <i>P. turtur</i>                  | Pair    | Pair   | Widespread  | -- | -- | -- | -- | -- |
| <i>P. crassirostris</i>           | Pair    | Pair   | Antarctic   | -- | -- | -- | -- | -- |
| <i>Bulweria bulwerii</i>          | Pair    | Pair   | Widespread  | -- | -- | -- | -- | -- |
| <i>B. fallax</i>                  | Unknown | Pair   | Africa      | -- | -- | -- | -- | -- |
| <i>Procellaria aequinoctialis</i> | Pair    | Pair   | Antarctic   | -- | -- | -- | -- | -- |
| <i>P. parkinsoni</i>              | Pair    | Pair   | Australia   | -- | -- | -- | -- | -- |

|                              |         |        |             |       |    |    |    |    |
|------------------------------|---------|--------|-------------|-------|----|----|----|----|
| <i>P. westlandica</i>        | Pair    | Pair   | Australia   | --    | -- | -- | -- | -- |
| <i>P. cinerea</i>            | Pair    | Pair   | Antarctic   | --    | -- | -- | -- | -- |
| <i>Calonectris diomedea</i>  | Pair    | Pair   | Widespread  | --    | -- | -- | -- | -- |
| <i>C. leucomelas</i>         | Pair    | Pair   | Palaearctic | --    | -- | -- | -- | -- |
| <i>Puffinus pacificus</i>    | Pair    | Pair   | Widespread  | --    | -- | -- | -- | -- |
| <i>P. bulleri</i>            | Pair    | Pair   | Australia   | --    | -- | -- | -- | -- |
| <i>P. carneipes</i>          | Pair    | Pair   | Widespread  | --    | -- | -- | -- | -- |
| <i>P. creatopus</i>          | Pair    | Pair   | Neotropical | --    | -- | -- | -- | -- |
| <i>P. gravis</i>             | Pair    | Pair   | Widespread  | --    | -- | -- | -- | -- |
| <i>P. griseus</i>            | Pair    | Pair   | Widespread  | --    | -- | -- | -- | -- |
| <i>P. tenuirostris</i>       | Pair    | Pair   | Australia   | --    | -- | -- | -- | -- |
| <i>P. nativitatis</i>        | Pair    | Pair   | Australia   | --    | -- | -- | -- | -- |
| <i>P. puffinus</i>           | Pair    | Pair   | Holarctic   | --    | -- | -- | -- | -- |
| <i>P. yelkouan</i>           | Pair    | Pair   | Palaearctic | --    | -- | -- | -- | -- |
| <i>P. auricularis</i>        | Pair    | Pair   | Widespread  | --    | -- | -- | -- | -- |
| <i>P. opisthomelas</i>       | Pair    | Pair   | Nearctic    | --    | -- | -- | -- | -- |
| <i>P. gavia</i>              | Pair    | Pair   | Australia   | --    | -- | -- | -- | -- |
| <i>P. huttoni</i>            | Pair    | Pair   | Australia   | --    | -- | -- | -- | -- |
| <i>P. lherminieri</i>        | Pair    | Pair   | Widespread  | --    | -- | -- | -- | -- |
| <i>P. assimilis</i>          | Pair    | Pair   | Widespread  | --    | -- | -- | -- | -- |
| <i>P. persicus</i>           | Subspp  | Subspp | Unknown     | --    | -- | -- | -- | -- |
| <i>P. bannermani</i>         | Subspp  | Subspp | Unknown     | --    | -- | -- | -- | -- |
| <i>P. heinrothi</i>          | Unknown | Pair   | Australia   | --    | -- | -- | -- | -- |
| <i>Pelecanoides garnotii</i> | Pair    | Pair   | Neotropical | [329] | -- | -- | -- | -- |
| <i>P. magellani</i>          | Pair    | Pair   | Neotropical | --    | -- | -- | -- | -- |
| <i>P. georgicus</i>          | Pair    | Pair   | Antarctic   | --    | -- | -- | -- | -- |
| <i>P. urinatrix</i>          | Pair    | Pair   | Antarctic   | --    | -- | -- | -- | -- |

**Ciconiida: Procellariidae: Diomedeinae**

|                          |      |      |             |       |                  |     |    |     |
|--------------------------|------|------|-------------|-------|------------------|-----|----|-----|
| <i>Diomedea exulans</i>  | Pair | Pair | Antarctic   | [330] | bbdabbbbbbbbbbbb | [3] | b  | [3] |
| <i>D. amsterdamensis</i> | Pair | Pair | Antarctic   | --    | --               | --  | -- | --  |
| <i>D. epomophora</i>     | Pair | Pair | Antarctic   | --    | --               | --  | -- | --  |
| <i>D. irrorata</i>       | Pair | Pair | Neotropical | --    | --               | --  | -- | --  |
| <i>D. albatrus</i>       | Pair | Pair | Palaearctic | --    | --               | --  | -- | --  |
| <i>D. nigripes</i>       | Pair | Pair | Holarctic   | --    | --               | --  | -- | --  |
| <i>D. immutabilis</i>    | Pair | Pair | Holarctic   | --    | --               | --  | -- | --  |
| <i>D. melanophris</i>    | Pair | Pair | Antarctic   | --    | --               | --  | -- | --  |
| <i>D. cauta</i>          | Pair | Pair | Widespread  | --    | --               | --  | -- | --  |
| <i>D. chrysostoma</i>    | Pair | Pair | Antarctic   | --    | --               | --  | -- | --  |
| <i>D. chlororhynchos</i> | Pair | Pair | Antarctic   | --    | --               | --  | -- | --  |
| <i>D. bulleri</i>        | Pair | Pair | Australia   | --    | --               | --  | -- | --  |
| <i>Phoebastria fusca</i> | Pair | Pair | Antarctic   | --    | --               | --  | -- | --  |
| <i>P. palpebrata</i>     | Pair | Pair | Antarctic   | --    | --               | --  | -- | --  |

**Ciconiida: Procellariidae: Hydrobatinae**

|                                |         |      |             |       |                  |     |    |     |
|--------------------------------|---------|------|-------------|-------|------------------|-----|----|-----|
| <i>Oceanites oceanicus</i>     | Pair    | Pair | Widespread  | [331] | bbdabbbbbbbbbbbb | [3] | c  | [3] |
| <i>O. gracilis</i>             | Unknown | Pair | Neotropical | --    | --               | --  | -- | --  |
| <i>Garrodia nereis</i>         | Pair    | Pair | Antarctic   | --    | --               | --  | -- | --  |
| <i>Pelagodroma marina</i>      | Pair    | Pair | Antarctic   | --    | --               | --  | -- | --  |
| <i>Fregetta tropica</i>        | Pair    | Pair | Antarctic   | --    | --               | --  | -- | --  |
| <i>F. grallaria</i>            | Pair    | Pair | Widespread  | --    | --               | --  | -- | --  |
| <i>Nesofregetta fuliginosa</i> | Pair    | Pair | Australia   | --    | --               | --  | -- | --  |
| <i>Hydrobates pelagicus</i>    | Pair    | Pair | Palaearctic | --    | --               | --  | -- | --  |
| <i>Oceanodroma microsoma</i>   | Pair    | Pair | Neotropical | --    | --               | --  | -- | --  |
| <i>O. tethys</i>               | Pair    | Pair | Neotropical | --    | --               | --  | -- | --  |
| <i>O. castro</i>               | Pair    | Pair | Widespread  | --    | --               | --  | -- | --  |
| <i>O. leucorhoa</i>            | Pair    | Pair | Holarctic   | --    | --               | --  | -- | --  |
| <i>O. monorhis</i>             | Pair    | Pair | Palaearctic | --    | --               | --  | -- | --  |
| <i>O. macrodactyla</i>         | Unknown | Pair | Neotropical | --    | --               | --  | -- | --  |
| <i>O. tristrami</i>            | Pair    | Pair | Palaearctic | --    | --               | --  | -- | --  |
| <i>O. markhami</i>             | Unknown | Pair | Neotropical | --    | --               | --  | -- | --  |
| <i>O. matsudairae</i>          | Unknown | Pair | Palaearctic | --    | --               | --  | -- | --  |
| <i>O. melania</i>              | Pair    | Pair | Nearctic    | --    | --               | --  | -- | --  |
| <i>O. homochroa</i>            | Pair    | Pair | Nearctic    | --    | --               | --  | -- | --  |
| <i>O. hornbyi</i>              | Unknown | Pair | Neotropical | --    | --               | --  | -- | --  |
| <i>O. furcata</i>              | Pair    | Pair | Holarctic   | --    | --               | --  | -- | --  |

**Acanthisittidae: Acanthisittidae**

|                             |             |             |           |       |       |            |  |  |
|-----------------------------|-------------|-------------|-----------|-------|-------|------------|--|--|
| <i>Acanthisitta chloris</i> | Cooperation | Cooperation | Australia | [332] | bbdba | [333, 334] |  |  |
| <i>Xenicus gilviventris</i> | Pair        | Pair        | Australia | --    | --    | --         |  |  |

**Old world suboscines: Pittidae**

|                         |         |      |             |       |          |            |  |  |
|-------------------------|---------|------|-------------|-------|----------|------------|--|--|
| <i>Pitta phayrei</i>    | Unknown | Pair | Indomalayan | [335] | bbdbbaaa | [333, 334] |  |  |
| <i>P. nivalensis</i>    | Pair    | Pair | Indomalayan | --    | --       | --         |  |  |
| <i>P. soror</i>         | Unknown | Pair | Indomalayan | --    | --       | --         |  |  |
| <i>P. oatesi</i>        | Unknown | Pair | Indomalayan | --    | --       | --         |  |  |
| <i>P. schneideri</i>    | Unknown | Pair | Indomalayan | --    | --       | --         |  |  |
| <i>P. caerulea</i>      | Pair    | Pair | Indomalayan | --    | --       | --         |  |  |
| <i>P. cyanea</i>        | Pair    | Pair | Indomalayan | --    | --       | --         |  |  |
| <i>P. guajana</i>       | Unknown | Pair | Indomalayan | --    | --       | --         |  |  |
| <i>P. elliotii</i>      | Unknown | Pair | Indomalayan | --    | --       | --         |  |  |
| <i>P. gurneyi</i>       | Pair    | Pair | Indomalayan | --    | --       | --         |  |  |
| <i>P. baudii</i>        | Unknown | Pair | Indomalayan | --    | --       | --         |  |  |
| <i>P. sordida</i>       | Pair    | Pair | Indomalayan | --    | --       | --         |  |  |
| <i>P. maxima</i>        | Unknown | Pair | Australia   | --    | --       | --         |  |  |
| <i>P. superba</i>       | Unknown | Pair | Australia   | --    | --       | --         |  |  |
| <i>P. steerii</i>       | Unknown | Pair | Indomalayan | --    | --       | --         |  |  |
| <i>P. kochi</i>         | Unknown | Pair | Indomalayan | --    | --       | --         |  |  |
| <i>P. erythrogaster</i> | Pair    | Pair | Australia   | --    | --       | --         |  |  |
| <i>P. dohertyi</i>      | Unknown | Pair | Australia   | --    | --       | --         |  |  |

|                                            |             |             |             |                 |             |                 |
|--------------------------------------------|-------------|-------------|-------------|-----------------|-------------|-----------------|
| <i>P. arquata</i>                          | Unknown     | Pair        | Indomalayan | --              | --          | --              |
| <i>P. granatina</i>                        | Unknown     | Pair        | Indomalayan | --              | --          | --              |
| <i>P. venusta</i>                          | Unknown     | Pair        | Indomalayan | --              | --          | --              |
| <i>P. angolensis</i>                       | Unknown     | Pair        | Africa      | --              | --          | --              |
| <i>P. reichenowi</i>                       | Unknown     | Pair        | Africa      | --              | --          | --              |
| <i>P. brachyura</i>                        | Unknown     | Pair        | Indomalayan | --              | --          | --              |
| <i>P. nympa</i>                            | Pair        | Pair        | Indomalayan | --              | --          | --              |
| <i>P. moluccensis</i>                      | Unknown     | Pair        | Indomalayan | --              | --          | --              |
| <i>P. megarhyncha</i>                      | Unknown     | Pair        | Indomalayan | --              | --          | --              |
| <i>P. elegans</i>                          | Unknown     | Pair        | Indomalayan | --              | --          | --              |
| <i>P. iris</i>                             | Pair        | Pair        | Australia   | [336]           | --          | --              |
| <i>P. versicolor</i>                       | Pair        | Pair        | Australia   | [335]           | --          | --              |
| <i>P. anerythra</i>                        | Unknown     | Pair        | Australia   | --              | --          | --              |
| <b>Old world suboscines: Eurylaimidae</b>  |             |             |             |                 |             |                 |
| <i>Smithornis capensis</i>                 | Pair        | Pair        | Africa      | [335, 337]      | bbdbbaaba   | [333, 334]      |
| <i>S. sharpei</i>                          | Unknown     | Pair        | Africa      | --              | --          | --              |
| <i>S. rufolateralis</i>                    | Pair        | Pair        | Africa      | --              | --          | --              |
| <i>Pseudocalyptomena graueri</i>           | Unknown     | Pair        | Africa      | --              | --          | --              |
| <i>Corydon sumatranus</i>                  | Suspected   | Cooperation | Indomalayan | --              | --          | --              |
| <i>Cymbirhynchus macrorhynchos</i>         | Pair        | Pair        | Indomalayan | --              | --          | --              |
| <i>Eurylaimus javanicus</i>                | Pair        | Pair        | Indomalayan | --              | --          | --              |
| <i>E. ochromalus</i>                       | Unknown     | Pair        | Indomalayan | --              | --          | --              |
| <i>E. steerii</i>                          | Unknown     | Pair        | Indomalayan | --              | --          | --              |
| <i>Serilophus lunatus</i>                  | Cooperation | Cooperation | Indomalayan | --              | --          | --              |
| <i>Psarisomus dalhousiae</i>               | Suspected   | Cooperation | Indomalayan | --              | --          | --              |
| <i>Calyptomena viridis</i>                 | Unknown     | Female only | Indomalayan | --              | --          | --              |
| <i>C. hosii</i>                            | Unknown     | Female only | Indomalayan | --              | --          | --              |
| <i>C. whiteheadi</i>                       | Unknown     | Female only | Indomalayan | --              | --          | --              |
| <i>Sapayoa aenigma</i>                     | Pair        | Pair        | Neotropical | [338]           | --          | [333, 334, 339] |
| <b>Old world suboscines: Philepittidae</b> |             |             |             |                 |             |                 |
| <i>Philepitta castanea</i>                 | Female only | Female only | Africa      | [335, 340, 341] | bbdbbaabb   | [333, 334]      |
| <i>P. schlegeli</i>                        | Unknown     | Female only | Africa      | --              | --          | --              |
| <i>Neodrepanis coruscans</i>               | Pair        | Pair        | Africa      | --              | --          | --              |
| <i>N. hypoxantha</i>                       | Pair        | Pair        | Africa      | --              | --          | --              |
| <b>Furnariida: Melanopareidae</b>          |             |             |             |                 |             |                 |
| <i>Melanopareia torquata</i>               | Unknown     | Pair        | Neotropical | [342]           | bbdbbabaa   | [343, 344]      |
| <i>M. maximiliani</i>                      | Unknown     | Pair        | Neotropical | --              | --          | --              |
| <i>M. elegans</i>                          | Unknown     | Pair        | Neotropical | --              | --          | --              |
| <b>Furnariida: Conopophagidae</b>          |             |             |             |                 |             |                 |
| <i>Conopophaga lineata</i>                 | Pair        | Pair        | Neotropical | [345]           | bbdbbababaa | [343, 344]      |
| <i>C. aurita</i>                           | Unknown     | Pair        | Neotropical | --              | --          | --              |
| <i>C. roberti</i>                          | Unknown     | Pair        | Neotropical | --              | --          | --              |
| <i>C. peruviana</i>                        | Unknown     | Pair        | Neotropical | --              | --          | --              |



|                                   |         |      |             |            |           |            |
|-----------------------------------|---------|------|-------------|------------|-----------|------------|
| <i>C. ardesiaca</i>               | Unknown | Pair | Neotropical | --         | --        | --         |
| <i>C. castaneiceps</i>            | Unknown | Pair | Neotropical | --         | --        | --         |
| <i>C. melanops</i>                | Pair    | Pair | Neotropical | --         | --        | --         |
| <i>C. melanogaster</i>            | Unknown | Pair | Neotropical | --         | --        | --         |
| <b>Furnariida: Thamnophilidae</b> |         |      |             |            |           |            |
| <i>Cymbilaimus lineatus</i>       | Pair    | Pair | Neotropical | [346]      | bbdbbabab | [343, 344] |
| <i>C. sanctaemariae</i>           | Unknown | Pair | Neotropical | --         | --        | --         |
| <i>Hypoedaleus guttatus</i>       | Unknown | Pair | Neotropical | --         | --        | --         |
| <i>Batara cinerea</i>             | Unknown | Pair | Neotropical | --         | --        | --         |
| <i>Mackenziaena severa</i>        | Unknown | Pair | Neotropical | --         | --        | --         |
| <i>M. leachii</i>                 | Unknown | Pair | Neotropical | --         | --        | --         |
| <i>Frederickena viridis</i>       | Unknown | Pair | Neotropical | --         | --        | --         |
| <i>F. unduligera</i>              | Unknown | Pair | Neotropical | --         | --        | --         |
| <i>Taraba major</i>               | Pair    | Pair | Neotropical | --         | --        | --         |
| <i>Sakesphorus canadensis</i>     | Pair    | Pair | Neotropical | --         | --        | --         |
| <i>S. cristatus</i>               | Unknown | Pair | Neotropical | --         | --        | --         |
| <i>S. bernardi</i>                | Pair    | Pair | Neotropical | --         | --        | --         |
| <i>S. melanonotus</i>             | Unknown | Pair | Neotropical | --         | --        | --         |
| <i>S. melanothorax</i>            | Unknown | Pair | Neotropical | --         | --        | --         |
| <i>S. luctuosus</i>               | Pair    | Pair | Neotropical | --         | --        | --         |
| <i>Biatas nigropectus</i>         | Unknown | Pair | Neotropical | --         | --        | --         |
| <i>Thamnophilus doliatus</i>      | Pair    | Pair | Neotropical | --         | --        | --         |
| <i>T. multistriatus</i>           | Unknown | Pair | Neotropical | --         | --        | --         |
| <i>T. palliatus</i>               | Unknown | Pair | Neotropical | --         | --        | --         |
| <i>T. bridgesi</i>                | Pair    | Pair | Neotropical | --         | --        | --         |
| <i>T. nigriceps</i>               | Unknown | Pair | Neotropical | --         | --        | --         |
| <i>T. praecox</i>                 | Unknown | Pair | Neotropical | --         | --        | --         |
| <i>T. nigrocinereus</i>           | Unknown | Pair | Neotropical | --         | --        | --         |
| <i>T. cryptoleucus</i>            | Unknown | Pair | Neotropical | [346, 347] | --        | --         |
| <i>T. aethiops</i>                | Pair    | Pair | Neotropical | [346]      | --        | --         |
| <i>T. unicolor</i>                | Unknown | Pair | Neotropical | --         | --        | --         |
| <i>T. schistaceus</i>             | Pair    | Pair | Neotropical | --         | --        | --         |
| <i>T. murinus</i>                 | Pair    | Pair | Neotropical | --         | --        | --         |
| <i>T. aroyae</i>                  | Unknown | Pair | Neotropical | --         | --        | --         |
| <i>T. punctatus</i>               | Pair    | Pair | Neotropical | --         | --        | --         |
| <i>T. insignis</i>                | Unknown | Pair | Neotropical | --         | --        | --         |
| <i>T. amazonicus</i>              | Unknown | Pair | Neotropical | --         | --        | --         |
| <i>T. caerulescens</i>            | Pair    | Pair | Neotropical | --         | --        | --         |
| <i>T. torquatus</i>               | Pair    | Pair | Neotropical | --         | --        | --         |
| <i>T. ruficapillus</i>            | Unknown | Pair | Neotropical | --         | --        | --         |
| <i>Pygiptila stellaris</i>        | Unknown | Pair | Neotropical | --         | --        | --         |
| <i>Megastictus margaritatus</i>   | Pair    | Pair | Neotropical | --         | --        | --         |
| <i>Neoctantes niger</i>           | Unknown | Pair | Neotropical | --         | --        | --         |

|                                 |         |      |             |    |    |    |
|---------------------------------|---------|------|-------------|----|----|----|
| <i>Clytactantes alixii</i>      | Unknown | Pair | Neotropical | -- | -- | -- |
| <i>C. atrogularis</i>           | Unknown | Pair | Neotropical | -- | -- | -- |
| <i>Xenornis setifrons</i>       | Pair    | Pair | Neotropical | -- | -- | -- |
| <i>Thamnistes anabatinus</i>    | Pair    | Pair | Neotropical | -- | -- | -- |
| <i>Dysithamnus stictothorax</i> | Unknown | Pair | Neotropical | -- | -- | -- |
| <i>D. mentalis</i>              | Pair    | Pair | Neotropical | -- | -- | -- |
| <i>D. striaticeps</i>           | Pair    | Pair | Neotropical | -- | -- | -- |
| <i>D. puncticeps</i>            | Unknown | Pair | Neotropical | -- | -- | -- |
| <i>D. xanthopterus</i>          | Unknown | Pair | Neotropical | -- | -- | -- |
| <i>D. leucostictus</i>          | Unknown | Pair | Neotropical | -- | -- | -- |
| <i>D. plumbeus</i>              | Unknown | Pair | Neotropical | -- | -- | -- |
| <i>D. occidentalis</i>          | Pair    | Pair | Neotropical | -- | -- | -- |
| <i>Thamnomanes ardesiacus</i>   | Unknown | Pair | Neotropical | -- | -- | -- |
| <i>T. caesius</i>               | Unknown | Pair | Neotropical | -- | -- | -- |
| <i>T. schistogynus</i>          | Unknown | Pair | Neotropical | -- | -- | -- |
| <i>Myrmotherula brachyura</i>   | Pair    | Pair | Neotropical | -- | -- | -- |
| <i>M. obscura</i>               | Unknown | Pair | Neotropical | -- | -- | -- |
| <i>M. sclateri</i>              | Unknown | Pair | Neotropical | -- | -- | -- |
| <i>M. klagesi</i>               | Unknown | Pair | Neotropical | -- | -- | -- |
| <i>M. ambigua</i>               | Unknown | Pair | Neotropical | -- | -- | -- |
| <i>M. surinamensis</i>          | Pair    | Pair | Neotropical | -- | -- | -- |
| <i>M. cherriei</i>              | Unknown | Pair | Neotropical | -- | -- | -- |
| <i>M. longicauda</i>            | Unknown | Pair | Neotropical | -- | -- | -- |
| <i>M. hauxwelli</i>             | Pair    | Pair | Neotropical | -- | -- | -- |
| <i>M. guttata</i>               | Unknown | Pair | Neotropical | -- | -- | -- |
| <i>M. gularis</i>               | Pair    | Pair | Neotropical | -- | -- | -- |
| <i>M. gutturalis</i>            | Pair    | Pair | Neotropical | -- | -- | -- |
| <i>M. fulviventris</i>          | Pair    | Pair | Neotropical | -- | -- | -- |
| <i>M. leucophthalma</i>         | Unknown | Pair | Neotropical | -- | -- | -- |
| <i>M. haematonota</i>           | Unknown | Pair | Neotropical | -- | -- | -- |
| <i>M. spodionota</i>            | Unknown | Pair | Neotropical | -- | -- | -- |
| <i>M. ornata</i>                | Unknown | Pair | Neotropical | -- | -- | -- |
| <i>M. erythrura</i>             | Unknown | Pair | Neotropical | -- | -- | -- |
| <i>M. axillaris</i>             | Pair    | Pair | Neotropical | -- | -- | -- |
| <i>M. fluminensis</i>           | Unknown | Pair | Neotropical | -- | -- | -- |
| <i>M. schisticolor</i>          | Pair    | Pair | Neotropical | -- | -- | -- |
| <i>M. sunensis</i>              | Unknown | Pair | Neotropical | -- | -- | -- |
| <i>M. longipennis</i>           | Pair    | Pair | Neotropical | -- | -- | -- |
| <i>M. minor</i>                 | Unknown | Pair | Neotropical | -- | -- | -- |
| <i>M. iheringi</i>              | Pair    | Pair | Neotropical | -- | -- | -- |
| <i>M. grisea</i>                | Unknown | Pair | Neotropical | -- | -- | -- |
| <i>M. unicolor</i>              | Unknown | Pair | Neotropical | -- | -- | -- |
| <i>M. behni</i>                 | Unknown | Pair | Neotropical | -- | -- | -- |

|                                 |         |      |             |    |    |    |
|---------------------------------|---------|------|-------------|----|----|----|
| <i>M. urosticta</i>             | Unknown | Pair | Neotropical | -- | -- | -- |
| <i>M. menetriesii</i>           | Unknown | Pair | Neotropical | -- | -- | -- |
| <i>M. assimilis</i>             | Unknown | Pair | Neotropical | -- | -- | -- |
| <i>Dichrozona cincta</i>        | Unknown | Pair | Neotropical | -- | -- | -- |
| <i>Myrmorchilus strigilatus</i> | Unknown | Pair | Neotropical | -- | -- | -- |
| <i>Herpsilochmus parkeri</i>    | Unknown | Pair | Neotropical | -- | -- | -- |
| <i>H. motacilloides</i>         | Unknown | Pair | Neotropical | -- | -- | -- |
| <i>H. atricapillus</i>          | Unknown | Pair | Neotropical | -- | -- | -- |
| <i>H. pileatus</i>              | Unknown | Pair | Neotropical | -- | -- | -- |
| <i>H. sticturus</i>             | Unknown | Pair | Neotropical | -- | -- | -- |
| <i>H. stictocephalus</i>        | Unknown | Pair | Neotropical | -- | -- | -- |
| <i>H. dorsimaculatus</i>        | Unknown | Pair | Neotropical | -- | -- | -- |
| <i>H. roraimae</i>              | Unknown | Pair | Neotropical | -- | -- | -- |
| <i>H. pectoralis</i>            | Unknown | Pair | Neotropical | -- | -- | -- |
| <i>H. longirostris</i>          | Unknown | Pair | Neotropical | -- | -- | -- |
| <i>H. axillaris</i>             | Unknown | Pair | Neotropical | -- | -- | -- |
| <i>H. rufimarginatus</i>        | Unknown | Pair | Neotropical | -- | -- | -- |
| <i>Microrhophias quixensis</i>  | Pair    | Pair | Neotropical | -- | -- | -- |
| <i>Formicivora iheringi</i>     | Unknown | Pair | Neotropical | -- | -- | -- |
| <i>F. grisea</i>                | Unknown | Pair | Neotropical | -- | -- | -- |
| <i>F. melanogaster</i>          | Unknown | Pair | Neotropical | -- | -- | -- |
| <i>F. serrana</i>               | Pair    | Pair | Neotropical | -- | -- | -- |
| <i>F. erythronotos</i>          | Pair    | Pair | Neotropical | -- | -- | -- |
| <i>F. rufa</i>                  | Pair    | Pair | Neotropical | -- | -- | -- |
| <i>Drymophila ferruginea</i>    | Unknown | Pair | Neotropical | -- | -- | -- |
| <i>D. rubricollis</i>           | Unknown | Pair | Neotropical | -- | -- | -- |
| <i>D. genei</i>                 | Unknown | Pair | Neotropical | -- | -- | -- |
| <i>D. ochropyga</i>             | Unknown | Pair | Neotropical | -- | -- | -- |
| <i>D. devillei</i>              | Unknown | Pair | Neotropical | -- | -- | -- |
| <i>D. caudata</i>               | Unknown | Pair | Neotropical | -- | -- | -- |
| <i>D. malura</i>                | Unknown | Pair | Neotropical | -- | -- | -- |
| <i>D. squamata</i>              | Pair    | Pair | Neotropical | -- | -- | -- |
| <i>Terenura maculata</i>        | Unknown | Pair | Neotropical | -- | -- | -- |
| <i>T. sicki</i>                 | Unknown | Pair | Neotropical | -- | -- | -- |
| <i>T. callinota</i>             | Unknown | Pair | Neotropical | -- | -- | -- |
| <i>T. humeralis</i>             | Unknown | Pair | Neotropical | -- | -- | -- |
| <i>T. sharpei</i>               | Unknown | Pair | Neotropical | -- | -- | -- |
| <i>T. spodioptila</i>           | Unknown | Pair | Neotropical | -- | -- | -- |
| <i>Cercomacra cinerascens</i>   | Unknown | Pair | Neotropical | -- | -- | -- |
| <i>C. brasiliانا</i>            | Unknown | Pair | Neotropical | -- | -- | -- |
| <i>C. tyrannina</i>             | Pair    | Pair | Neotropical | -- | -- | -- |
| <i>C. nigrescens</i>            | Unknown | Pair | Neotropical | -- | -- | -- |
| <i>C. ferdinandi</i>            | Unknown | Pair | Neotropical | -- | -- | -- |

|                                  |         |      |             |    |    |    |
|----------------------------------|---------|------|-------------|----|----|----|
| <i>C. serva</i>                  | Unknown | Pair | Neotropical | -- | -- | -- |
| <i>C. nigricans</i>              | Unknown | Pair | Neotropical | -- | -- | -- |
| <i>C. carbonaria</i>             | Unknown | Pair | Neotropical | -- | -- | -- |
| <i>C. manu</i>                   | Unknown | Pair | Neotropical | -- | -- | -- |
| <i>C. melanaria</i>              | Unknown | Pair | Neotropical | -- | -- | -- |
| <i>Pyriglena leuconota</i>       | Pair    | Pair | Neotropical | -- | -- | -- |
| <i>P. leucoptera</i>             | Pair    | Pair | Neotropical | -- | -- | -- |
| <i>P. atra</i>                   | Unknown | Pair | Neotropical | -- | -- | -- |
| <i>Rhopornis ardesiaca</i>       | Unknown | Pair | Neotropical | -- | -- | -- |
| <i>Myrmoborus leucophrys</i>     | Unknown | Pair | Neotropical | -- | -- | -- |
| <i>M. lugubris</i>               | Unknown | Pair | Neotropical | -- | -- | -- |
| <i>M. myotherinus</i>            | Unknown | Pair | Neotropical | -- | -- | -- |
| <i>M. melanurus</i>              | Unknown | Pair | Neotropical | -- | -- | -- |
| <i>Hypocnemis cantator</i>       | Pair    | Pair | Neotropical | -- | -- | -- |
| <i>H. hypoxantha</i>             | Unknown | Pair | Neotropical | -- | -- | -- |
| <i>Hypocnemoides melanopogon</i> | Unknown | Pair | Neotropical | -- | -- | -- |
| <i>H. maculicauda</i>            | Unknown | Pair | Neotropical | -- | -- | -- |
| <i>Myrmochanes hemileucus</i>    | Unknown | Pair | Neotropical | -- | -- | -- |
| <i>Gymnocichla nudiceps</i>      | Unknown | Pair | Neotropical | -- | -- | -- |
| <i>Sclateria naevia</i>          | Unknown | Pair | Neotropical | -- | -- | -- |
| <i>Percnostola rufifrons</i>     | Pair    | Pair | Neotropical | -- | -- | -- |
| <i>P. schistacea</i>             | Unknown | Pair | Neotropical | -- | -- | -- |
| <i>P. leucostigma</i>            | Unknown | Pair | Neotropical | -- | -- | -- |
| <i>P. caurensis</i>              | Unknown | Pair | Neotropical | -- | -- | -- |
| <i>P. lophotes</i>               | Unknown | Pair | Neotropical | -- | -- | -- |
| <i>Myrmeciza berlepschi</i>      | Unknown | Pair | Neotropical | -- | -- | -- |
| <i>M. longipes</i>               | Unknown | Pair | Neotropical | -- | -- | -- |
| <i>M. exsul</i>                  | Pair    | Pair | Neotropical | -- | -- | -- |
| <i>M. ferruginea</i>             | Unknown | Pair | Neotropical | -- | -- | -- |
| <i>M. ruficauda</i>              | Pair    | Pair | Neotropical | -- | -- | -- |
| <i>M. loricata</i>               | Unknown | Pair | Neotropical | -- | -- | -- |
| <i>M. squamosa</i>               | Unknown | Pair | Neotropical | -- | -- | -- |
| <i>M. laemosticta</i>            | Unknown | Pair | Neotropical | -- | -- | -- |
| <i>M. nigricauda</i>             | Unknown | Pair | Neotropical | -- | -- | -- |
| <i>M. disjuncta</i>              | Unknown | Pair | Neotropical | -- | -- | -- |
| <i>M. pelzelni</i>               | Unknown | Pair | Neotropical | -- | -- | -- |
| <i>M. hemimelaena</i>            | Unknown | Pair | Neotropical | -- | -- | -- |
| <i>M. hyperythra</i>             | Pair    | Pair | Neotropical | -- | -- | -- |
| <i>M. melanoceps</i>             | Pair    | Pair | Neotropical | -- | -- | -- |
| <i>M. goeldii</i>                | Pair    | Pair | Neotropical | -- | -- | -- |
| <i>M. fortis</i>                 | Unknown | Pair | Neotropical | -- | -- | -- |
| <i>M. immaculata</i>             | Unknown | Pair | Neotropical | -- | -- | -- |
| <i>M. griseiceps</i>             | Unknown | Pair | Neotropical | -- | -- | -- |

|                                   |             |             |             |            |             |            |
|-----------------------------------|-------------|-------------|-------------|------------|-------------|------------|
| <i>M. atrothorax</i>              | Pair        | Pair        | Neotropical | --         | --          | --         |
| <i>Pithys albifrons</i>           | Pair        | Pair        | Neotropical | --         | --          | --         |
| <i>P. castanea</i>                | Unknown     | Pair        | Neotropical | --         | --          | --         |
| <i>Gymnopathys rufigula</i>       | Pair        | Pair        | Neotropical | --         | --          | --         |
| <i>G. bicolor</i>                 | Subspp      | Subspp      | Neotropical | --         | --          | --         |
| <i>G. leucaspis</i>               | Pair        | Pair        | Neotropical | --         | --          | --         |
| <i>G. lunulata</i>                | Pair        | Pair        | Neotropical | --         | --          | --         |
| <i>G. salvini</i>                 | Unknown     | Pair        | Neotropical | --         | --          | --         |
| <i>Myrmornis torquata</i>         | Unknown     | Pair        | Neotropical | --         | --          | --         |
| <i>Rhegmatorhina melanosticta</i> | Pair        | Pair        | Neotropical | --         | --          | --         |
| <i>R. cristata</i>                | Unknown     | Pair        | Neotropical | --         | --          | --         |
| <i>R. hoffmannsi</i>              | Unknown     | Pair        | Neotropical | --         | --          | --         |
| <i>R. berlepschi</i>              | Unknown     | Pair        | Neotropical | --         | --          | --         |
| <i>R. gymnops</i>                 | Unknown     | Pair        | Neotropical | --         | --          | --         |
| <i>Hylophylax naevioides</i>      | Pair        | Pair        | Neotropical | --         | --          | --         |
| <i>H. naevia</i>                  | Pair        | Pair        | Neotropical | --         | --          | --         |
| <i>H. punctulata</i>              | Unknown     | Pair        | Neotropical | --         | --          | --         |
| <i>H. poecilonota</i>             | Pair        | Pair        | Neotropical | --         | --          | --         |
| <i>Phlegopsis nigromaculata</i>   | Cooperation | Cooperation | Neotropical | --         | --          | --         |
| <i>P. erythroptera</i>            | Unknown     | Cooperation | Neotropical | --         | --          | --         |
| <i>Skutchia borbae</i>            | Unknown     | Pair        | Neotropical | --         | --          | --         |
| <i>Phaenostictus mcleannani</i>   | Group       | Pair        | Neotropical | [346, 348] | --          | --         |
| <b>Furnariida: Grallariidae</b>   |             |             |             |            |             |            |
| <i>Pittasoma michleri</i>         | Unknown     | Pair        | Neotropical | [349]      | bbdbbababba | [343, 344] |
| <i>P. rufopileatum</i>            | Unknown     | Pair        | Neotropical | --         | --          | --         |
| <i>Grallaria squamigera</i>       | Unknown     | Pair        | Neotropical | --         | --          | --         |
| <i>G. gigantea</i>                | Unknown     | Pair        | Neotropical | --         | --          | --         |
| <i>G. excelsa</i>                 | Unknown     | Pair        | Neotropical | --         | --          | --         |
| <i>G. varia</i>                   | Pair        | Pair        | Neotropical | --         | --          | --         |
| <i>G. guatemalensis</i>           | Pair        | Pair        | Neotropical | --         | --          | --         |
| <i>G. alleni</i>                  | Unknown     | Pair        | Neotropical | --         | --          | --         |
| <i>G. chthonia</i>                | Unknown     | Pair        | Neotropical | --         | --          | --         |
| <i>G. haplonota</i>               | Unknown     | Pair        | Neotropical | --         | --          | --         |
| <i>G. dignissima</i>              | Unknown     | Pair        | Neotropical | --         | --          | --         |
| <i>G. eludens</i>                 | Unknown     | Pair        | Neotropical | --         | --          | --         |
| <i>G. kaestneri</i>               | Unknown     | Pair        | Neotropical | --         | --          | --         |
| <i>G. bangsi</i>                  | Unknown     | Pair        | Neotropical | --         | --          | --         |
| <i>G. ruficapilla</i>             | Unknown     | Pair        | Neotropical | --         | --          | --         |
| <i>G. watkinsi</i>                | Unknown     | Pair        | Neotropical | --         | --          | --         |
| <i>G. andicola</i>                | Unknown     | Pair        | Neotropical | --         | --          | --         |
| <i>G. rufocinerea</i>             | Unknown     | Pair        | Neotropical | --         | --          | --         |
| <i>G. nuchalis</i>                | Unknown     | Pair        | Neotropical | --         | --          | --         |
| <i>G. carrikeri</i>               | Pair        | Pair        | Neotropical | --         | --          | --         |

|                                  |         |      |             |    |    |    |
|----------------------------------|---------|------|-------------|----|----|----|
| <i>G. albigula</i>               | Unknown | Pair | Neotropical | -- | -- | -- |
| <i>G. flavotincta</i>            | Unknown | Pair | Neotropical | -- | -- | -- |
| <i>G. hypoleuca</i>              | Unknown | Pair | Neotropical | -- | -- | -- |
| <i>G. przewalskii</i>            | Unknown | Pair | Neotropical | -- | -- | -- |
| <i>G. capitalis</i>              | Unknown | Pair | Neotropical | -- | -- | -- |
| <i>G. erythroleuca</i>           | Unknown | Pair | Neotropical | -- | -- | -- |
| <i>G. griseonucha</i>            | Unknown | Pair | Neotropical | -- | -- | -- |
| <i>G. rufula</i>                 | Unknown | Pair | Neotropical | -- | -- | -- |
| <i>G. blakei</i>                 | Unknown | Pair | Neotropical | -- | -- | -- |
| <i>G. erythrotis</i>             | Unknown | Pair | Neotropical | -- | -- | -- |
| <i>G. quitensis</i>              | Unknown | Pair | Neotropical | -- | -- | -- |
| <i>G. milleri</i>                | Unknown | Pair | Neotropical | -- | -- | -- |
| <i>Hylopezus perspicillatus</i>  | Unknown | Pair | Neotropical | -- | -- | -- |
| <i>H. macularius</i>             | Unknown | Pair | Neotropical | -- | -- | -- |
| <i>H. dives</i>                  | Unknown | Pair | Neotropical | -- | -- | -- |
| <i>H. fulviventris</i>           | Unknown | Pair | Neotropical | -- | -- | -- |
| <i>H. berlepschi</i>             | Unknown | Pair | Neotropical | -- | -- | -- |
| <i>H. ochroleucus</i>            | Unknown | Pair | Neotropical | -- | -- | -- |
| <i>H. nattereri</i>              | Unknown | Pair | Neotropical | -- | -- | -- |
| <i>Myrmothera campanisona</i>    | Unknown | Pair | Neotropical | -- | -- | -- |
| <i>M. simplex</i>                | Unknown | Pair | Neotropical | -- | -- | -- |
| <i>Grallaricula flavirostris</i> | Pair    | Pair | Neotropical | -- | -- | -- |
| <i>G. ferrugineipectus</i>       | Pair    | Pair | Neotropical | -- | -- | -- |
| <i>G. nana</i>                   | Unknown | Pair | Neotropical | -- | -- | -- |
| <i>G. loricata</i>               | Unknown | Pair | Neotropical | -- | -- | -- |
| <i>G. peruviana</i>              | Unknown | Pair | Neotropical | -- | -- | -- |
| <i>G. ochraceifrons</i>          | Unknown | Pair | Neotropical | -- | -- | -- |
| <i>G. lineifrons</i>             | Unknown | Pair | Neotropical | -- | -- | -- |
| <i>G. cucullata</i>              | Unknown | Pair | Neotropical | -- | -- | -- |

**Furnariida: Rhinocryptidae**

|                                |         |      |             |       |              |            |
|--------------------------------|---------|------|-------------|-------|--------------|------------|
| <i>Pteroptochos tarnii</i>     | Pair    | Pair | Neotropical | [342] | bbdbbababbaa | [343, 344] |
| <i>P. megapodius</i>           | Unknown | Pair | Neotropical | --    | --           | --         |
| <i>Scelorchilus albicollis</i> | Pair    | Pair | Neotropical | --    | --           | --         |
| <i>S. rubecula</i>             | Pair    | Pair | Neotropical | --    | --           | --         |
| <i>Rhinocrypta lanceolata</i>  | Pair    | Pair | Neotropical | --    | --           | --         |
| <i>Teledromas fuscus</i>       | Unknown | Pair | Neotropical | --    | --           | --         |
| <i>Liosceles thoracicus</i>    | Unknown | Pair | Neotropical | --    | --           | --         |
| <i>Psilorhamphus guttatus</i>  | Unknown | Pair | Neotropical | --    | --           | --         |
| <i>Merulaxis ater</i>          | Unknown | Pair | Neotropical | --    | --           | --         |
| <i>M. stresemanni</i>          | Unknown | Pair | Neotropical | --    | --           | --         |
| <i>Eugralla paradoxa</i>       | Pair    | Pair | Neotropical | --    | --           | --         |
| <i>Myornis senilis</i>         | Unknown | Pair | Neotropical | --    | --           | --         |
| <i>Scytalopus unicolor</i>     | Unknown | Pair | Neotropical | --    | --           | --         |

|                                       |         |      |             |       |               |            |
|---------------------------------------|---------|------|-------------|-------|---------------|------------|
| <i>S. macropus</i>                    | Unknown | Pair | Neotropical | --    | --            | --         |
| <i>S. femoralis</i>                   | Unknown | Pair | Neotropical | --    | --            | --         |
| <i>S. panamensis</i>                  | Unknown | Pair | Neotropical | --    | --            | --         |
| <i>S. viciniior</i>                   | Pair    | Pair | Neotropical | --    | --            | --         |
| <i>S. argentifrons</i>                | Unknown | Pair | Neotropical | --    | --            | --         |
| <i>S. latebricola</i>                 | Unknown | Pair | Neotropical | --    | --            | --         |
| <i>S. magellanicus</i>                | Pair    | Pair | Neotropical | --    | --            | --         |
| <i>S. superciliaris</i>               | Unknown | Pair | Neotropical | --    | --            | --         |
| <i>S. speluncae</i>                   | Unknown | Pair | Neotropical | --    | --            | --         |
| <i>S. novacapitalis</i>               | Unknown | Pair | Neotropical | --    | --            | --         |
| <i>S. psychopompus</i>                | Unknown | Pair | Neotropical | --    | --            | --         |
| <i>S. indigoticus</i>                 | Unknown | Pair | Neotropical | --    | --            | --         |
| <i>Acropternis orthonyx</i>           | Unknown | Pair | Neotropical | --    | --            | --         |
| <b>Furnariida: Formicariidae</b>      |         |      |             |       |               |            |
| <i>Formicarius colma</i>              | Unknown | Pair | Neotropical | [349] | bbdbbababbbab | [343, 344] |
| <i>F. analis</i>                      | Pair    | Pair | Neotropical | --    | --            | --         |
| <i>F. rufifrons</i>                   | Unknown | Pair | Neotropical | --    | --            | --         |
| <i>F. nigricapillus</i>               | Unknown | Pair | Neotropical | --    | --            | --         |
| <i>F. rufipectus</i>                  | Unknown | Pair | Neotropical | --    | --            | --         |
| <i>Chamaeza campanisona</i>           | Unknown | Pair | Neotropical | --    | --            | --         |
| <i>C. nobilis</i>                     | Unknown | Pair | Neotropical | --    | --            | --         |
| <i>C. turdina</i>                     | Unknown | Pair | Neotropical | --    | --            | --         |
| <i>C. meruloides</i>                  | Unknown | Pair | Neotropical | --    | --            | --         |
| <i>C. ruficauda</i>                   | Unknown | Pair | Neotropical | --    | --            | --         |
| <i>C. mollissima</i>                  | Unknown | Pair | Neotropical | --    | --            | --         |
| <b>Furnariida: Sclerurus/Geositta</b> |         |      |             |       |               |            |
| <i>Geobates poecilopterus</i>         | Unknown | Pair | Neotropical | [350] | bbdbbababbbba | [343, 344] |
| <i>Geositta cucularia</i>             | Pair    | Pair | Neotropical | --    | --            | --         |
| <i>G. maritima</i>                    | Unknown | Pair | Neotropical | --    | --            | --         |
| <i>G. peruviana</i>                   | Unknown | Pair | Neotropical | --    | --            | --         |
| <i>G. punensis</i>                    | Unknown | Pair | Neotropical | --    | --            | --         |
| <i>G. saxicolina</i>                  | Unknown | Pair | Neotropical | --    | --            | --         |
| <i>G. isabellina</i>                  | Unknown | Pair | Neotropical | --    | --            | --         |
| <i>G. antarctica</i>                  | Unknown | Pair | Neotropical | --    | --            | --         |
| <i>G. rufipennis</i>                  | Unknown | Pair | Neotropical | --    | --            | --         |
| <i>G. crassirostris</i>               | Unknown | Pair | Neotropical | --    | --            | --         |
| <i>G. tenuirostris</i>                | Unknown | Pair | Neotropical | --    | --            | --         |
| <i>Sclerurus mexicanus</i>            | Unknown | Pair | Neotropical | --    | --            | --         |
| <i>S. ruficularis</i>                 | Unknown | Pair | Neotropical | --    | --            | --         |
| <i>S. albigularis</i>                 | Unknown | Pair | Neotropical | --    | --            | --         |
| <i>S. caudacutus</i>                  | Pair    | Pair | Neotropical | --    | --            | --         |
| <i>S. scansor</i>                     | Unknown | Pair | Neotropical | --    | --            | --         |
| <i>S. guatemalensis</i>               | Pair    | Pair | Neotropical | --    | --            | --         |

**Furnariida: Dendrocolaptidae**

|                                        |             |             |             |            |               |            |
|----------------------------------------|-------------|-------------|-------------|------------|---------------|------------|
| <i>Campylorhamphus pucherani</i>       | Unknown     | Pair        | Neotropical | [351]      | bbdbbababbbba | [343, 344] |
| <i>C. trochilirostris</i>              | Pair        | Pair        | Neotropical | --         | --            | --         |
| <i>C. falcularius</i>                  | Unknown     | Pair        | Neotropical | --         | --            | --         |
| <i>C. pusillus</i>                     | Unknown     | Pair        | Neotropical | --         | --            | --         |
| <i>C. procurvoides</i>                 | Unknown     | Pair        | Neotropical | --         | --            | --         |
| <i>Deconychura longicauda</i>          | Unknown     | Female only | Neotropical | --         | --            | --         |
| <i>D. stictolaema</i>                  | Unknown     | Female only | Neotropical | --         | --            | --         |
| <i>Dendrexetastes rufigula</i>         | Unknown     | Pair        | Neotropical | --         | --            | --         |
| <i>Dendrocincla tyrannina</i>          | Female only | Female only | Neotropical | [351, 352] | --            | --         |
| <i>D. fuliginosa</i>                   | Female only | Female only | Neotropical | [351]      | --            | --         |
| <i>D. turdina</i>                      | Female only | Female only | Neotropical | --         | --            | --         |
| <i>D. anabatina</i>                    | Female only | Female only | Neotropical | --         | --            | --         |
| <i>D. merula</i>                       | Female only | Female only | Neotropical | --         | --            | --         |
| <i>D. homochroa</i>                    | Unknown     | Female only | Neotropical | --         | --            | --         |
| <i>Dendrocolaptes certhia</i>          | Pair        | Pair        | Neotropical | --         | --            | --         |
| <i>D. hoffmannsi</i>                   | Unknown     | Pair        | Neotropical | --         | --            | --         |
| <i>D. picumnus</i>                     | Pair        | Pair        | Neotropical | --         | --            | --         |
| <i>D. platyrostris</i>                 | Pair        | Pair        | Neotropical | --         | --            | --         |
| <i>Drymornis bridgesii</i>             | Pair        | Pair        | Neotropical | --         | --            | --         |
| <i>Glyphorhynchus spirurus</i>         | Pair        | Pair        | Neotropical | --         | --            | --         |
| <i>Hylexetastes stresemanni</i>        | Unknown     | Pair        | Neotropical | --         | --            | --         |
| <i>H. perrotii</i>                     | Unknown     | Pair        | Neotropical | --         | --            | --         |
| <i>Lepidocolaptes leucogaster</i>      | Unknown     | Pair        | Neotropical | --         | --            | --         |
| <i>L. souleyetii</i>                   | Pair        | Pair        | Neotropical | --         | --            | --         |
| <i>L. angustirostris</i>               | Unknown     | Pair        | Neotropical | --         | --            | --         |
| <i>L. affinis</i>                      | Pair        | Pair        | Neotropical | --         | --            | --         |
| <i>L. squamatus</i>                    | Unknown     | Pair        | Neotropical | --         | --            | --         |
| <i>L. fuscus</i>                       | Unknown     | Pair        | Neotropical | --         | --            | --         |
| <i>L. albolineatus</i>                 | Unknown     | Pair        | Neotropical | --         | --            | --         |
| <i>Nasica longirostris</i>             | Pair        | Pair        | Neotropical | --         | --            | --         |
| <i>Sittasomus griseicapillus</i>       | Pair        | Pair        | Neotropical | --         | --            | --         |
| <i>Xiphocolaptes promeropirhynchus</i> | Unknown     | Pair        | Neotropical | --         | --            | --         |
| <i>X. albicollis</i>                   | Unknown     | Pair        | Neotropical | --         | --            | --         |
| <i>X. falcirostris</i>                 | Unknown     | Pair        | Neotropical | --         | --            | --         |
| <i>X. major</i>                        | Unknown     | Pair        | Neotropical | --         | --            | --         |
| <i>Xiphorhynchus picus</i>             | Unknown     | Pair        | Neotropical | --         | --            | --         |
| <i>X. necopinus</i>                    | Unknown     | Pair        | Neotropical | --         | --            | --         |
| <i>X. obsoletus</i>                    | Unknown     | Pair        | Neotropical | --         | --            | --         |
| <i>X. ocellatus</i>                    | Unknown     | Pair        | Neotropical | --         | --            | --         |
| <i>X. spixii</i>                       | Unknown     | Pair        | Neotropical | --         | --            | --         |
| <i>X. elegans</i>                      | Unknown     | Pair        | Neotropical | --         | --            | --         |
| <i>X. pardalotus</i>                   | Pair        | Pair        | Neotropical | --         | --            | --         |



|                                     |             |             |             |            |               |            |
|-------------------------------------|-------------|-------------|-------------|------------|---------------|------------|
| <i>X. guttatus</i>                  | Female only | Female only | Neotropical | --         | --            | --         |
| <i>X. eytoni</i>                    | Subspp      | Subspp      | Neotropical | --         | --            | --         |
| <i>X. flavigaster</i>               | Female only | Female only | Neotropical | [351, 353] | --            | --         |
| <i>X. lachrymosus</i>               | Unknown     | Female only | Neotropical | [351]      | --            | --         |
| <i>X. erythropygus</i>              | Unknown     | Female only | Neotropical | --         | --            | --         |
| <i>X. triangularis</i>              | Unknown     | Female only | Neotropical | --         | --            | --         |
| <b>Furnariida: Furnariidae</b>      |             |             |             |            |               |            |
| <i>Upucerthia harterti</i>          | Unknown     | Pair        | Neotropical | [350]      | bbdbbababbbbb | [343, 344] |
| <i>U. certhioides</i>               | Unknown     | Pair        | Neotropical | --         | --            | --         |
| <i>U. ruficauda</i>                 | Unknown     | Pair        | Neotropical | --         | --            | --         |
| <i>U. andaecola</i>                 | Unknown     | Pair        | Neotropical | --         | --            | --         |
| <i>U. serrana</i>                   | Unknown     | Pair        | Neotropical | --         | --            | --         |
| <i>U. dumetaria</i>                 | Unknown     | Pair        | Neotropical | --         | --            | --         |
| <i>U. albigula</i>                  | Unknown     | Pair        | Neotropical | --         | --            | --         |
| <i>U. jelskii</i>                   | Unknown     | Pair        | Neotropical | --         | --            | --         |
| <i>U. validirostris</i>             | Unknown     | Pair        | Neotropical | --         | --            | --         |
| <i>Cinclodes fuscus</i>             | Pair        | Pair        | Neotropical | --         | --            | --         |
| <i>C. comechingonus</i>             | Pair        | Pair        | Neotropical | --         | --            | --         |
| <i>C. pabsti</i>                    | Unknown     | Pair        | Neotropical | --         | --            | --         |
| <i>C. oustaleti</i>                 | Unknown     | Pair        | Neotropical | --         | --            | --         |
| <i>C. olrogi</i>                    | Unknown     | Pair        | Neotropical | --         | --            | --         |
| <i>C. excelsior</i>                 | Unknown     | Pair        | Neotropical | --         | --            | --         |
| <i>C. patagonicus</i>               | Unknown     | Pair        | Neotropical | --         | --            | --         |
| <i>C. taczanowskii</i>              | Unknown     | Pair        | Neotropical | --         | --            | --         |
| <i>C. nigrofumosus</i>              | Unknown     | Pair        | Neotropical | --         | --            | --         |
| <i>C. antarcticus</i>               | Pair        | Pair        | Neotropical | --         | --            | --         |
| <i>C. atacamensis</i>               | Unknown     | Pair        | Neotropical | --         | --            | --         |
| <i>C. palliatus</i>                 | Unknown     | Pair        | Neotropical | --         | --            | --         |
| <i>Chilia melanura</i>              | Unknown     | Pair        | Neotropical | --         | --            | --         |
| <i>Furnarius minor</i>              | Unknown     | Pair        | Neotropical | --         | --            | --         |
| <i>F. figulus</i>                   | Unknown     | Pair        | Neotropical | --         | --            | --         |
| <i>F. leucopus</i>                  | Pair        | Pair        | Neotropical | --         | --            | --         |
| <i>F. torridus</i>                  | Unknown     | Pair        | Neotropical | --         | --            | --         |
| <i>F. rufus</i>                     | Pair        | Pair        | Neotropical | --         | --            | --         |
| <i>F. cristatus</i>                 | Unknown     | Pair        | Neotropical | --         | --            | --         |
| <i>Sylviorthorhynchus desmursii</i> | Unknown     | Pair        | Neotropical | --         | --            | --         |
| <i>Aphrastura spinicauda</i>        | Pair        | Pair        | Neotropical | [354]      | --            | --         |
| <i>A. masafuerae</i>                | Pair        | Pair        | Neotropical | [350]      | --            | --         |
| <i>Leptasthenura fuliginiceps</i>   | Unknown     | Pair        | Neotropical | --         | --            | --         |
| <i>L. yanacensis</i>                | Pair        | Pair        | Neotropical | --         | --            | --         |
| <i>L. platensis</i>                 | Pair        | Pair        | Neotropical | --         | --            | --         |
| <i>L. aegithaloides</i>             | Unknown     | Pair        | Neotropical | --         | --            | --         |
| <i>L. striolata</i>                 | Pair        | Pair        | Neotropical | --         | --            | --         |

|                                     |         |      |             |    |    |    |
|-------------------------------------|---------|------|-------------|----|----|----|
| <i>L. pileata</i>                   | Unknown | Pair | Neotropical | -- | -- | -- |
| <i>L. xenothorax</i>                | Unknown | Pair | Neotropical | -- | -- | -- |
| <i>L. striata</i>                   | Unknown | Pair | Neotropical | -- | -- | -- |
| <i>L. andicola</i>                  | Unknown | Pair | Neotropical | -- | -- | -- |
| <i>L. setaria</i>                   | Unknown | Pair | Neotropical | -- | -- | -- |
| <i>Schizoeaca perijana</i>          | Unknown | Pair | Neotropical | -- | -- | -- |
| <i>S. coryi</i>                     | Unknown | Pair | Neotropical | -- | -- | -- |
| <i>S. fuliginosa</i>                | Unknown | Pair | Neotropical | -- | -- | -- |
| <i>S. griseomurina</i>              | Unknown | Pair | Neotropical | -- | -- | -- |
| <i>S. palpebralis</i>               | Unknown | Pair | Neotropical | -- | -- | -- |
| <i>S. vilcabambae</i>               | Unknown | Pair | Neotropical | -- | -- | -- |
| <i>S. helleri</i>                   | Unknown | Pair | Neotropical | -- | -- | -- |
| <i>S. harterti</i>                  | Pair    | Pair | Neotropical | -- | -- | -- |
| <i>S. moreirae</i>                  | Unknown | Pair | Neotropical | -- | -- | -- |
| <i>Schoeniophylax phryganophila</i> | Pair    | Pair | Neotropical | -- | -- | -- |
| <i>Synallaxis ruficapilla</i>       | Unknown | Pair | Neotropical | -- | -- | -- |
| <i>S. frontalis</i>                 | Pair    | Pair | Neotropical | -- | -- | -- |
| <i>S. azarae</i>                    | Pair    | Pair | Neotropical | -- | -- | -- |
| <i>S. courseni</i>                  | Unknown | Pair | Neotropical | -- | -- | -- |
| <i>S. albescens</i>                 | Pair    | Pair | Neotropical | -- | -- | -- |
| <i>S. spixi</i>                     | Pair    | Pair | Neotropical | -- | -- | -- |
| <i>S. brachyura</i>                 | Pair    | Pair | Neotropical | -- | -- | -- |
| <i>S. albigularis</i>               | Unknown | Pair | Neotropical | -- | -- | -- |
| <i>S. hypospodia</i>                | Unknown | Pair | Neotropical | -- | -- | -- |
| <i>S. infuscata</i>                 | Pair    | Pair | Neotropical | -- | -- | -- |
| <i>S. moesta</i>                    | Unknown | Pair | Neotropical | -- | -- | -- |
| <i>S. macconnelli</i>               | Unknown | Pair | Neotropical | -- | -- | -- |
| <i>S. cabanisi</i>                  | Unknown | Pair | Neotropical | -- | -- | -- |
| <i>S. subpudica</i>                 | Unknown | Pair | Neotropical | -- | -- | -- |
| <i>S. tithys</i>                    | Unknown | Pair | Neotropical | -- | -- | -- |
| <i>S. cinerascens</i>               | Unknown | Pair | Neotropical | -- | -- | -- |
| <i>S. propinqua</i>                 | Unknown | Pair | Neotropical | -- | -- | -- |
| <i>S. hellmayri</i>                 | Unknown | Pair | Neotropical | -- | -- | -- |
| <i>S. maranonica</i>                | Unknown | Pair | Neotropical | -- | -- | -- |
| <i>S. gujanensis</i>                | Pair    | Pair | Neotropical | -- | -- | -- |
| <i>S. albilora</i>                  | Unknown | Pair | Neotropical | -- | -- | -- |
| <i>S. rutilans</i>                  | Unknown | Pair | Neotropical | -- | -- | -- |
| <i>S. cherriei</i>                  | Unknown | Pair | Neotropical | -- | -- | -- |
| <i>S. unirufa</i>                   | Unknown | Pair | Neotropical | -- | -- | -- |
| <i>S. castanea</i>                  | Unknown | Pair | Neotropical | -- | -- | -- |
| <i>S. fusciorufa</i>                | Unknown | Pair | Neotropical | -- | -- | -- |
| <i>S. zimneri</i>                   | Pair    | Pair | Neotropical | -- | -- | -- |
| <i>S. erythrothorax</i>             | Pair    | Pair | Neotropical | -- | -- | -- |

|                                |         |        |             |    |    |    |
|--------------------------------|---------|--------|-------------|----|----|----|
| <i>S. cinnamomea</i>           | Unknown | Pair   | Neotropical | -- | -- | -- |
| <i>S. stictothorax</i>         | Unknown | Pair   | Neotropical | -- | -- | -- |
| <i>S. candei</i>               | Unknown | Pair   | Neotropical | -- | -- | -- |
| <i>S. kollari</i>              | Unknown | Pair   | Neotropical | -- | -- | -- |
| <i>S. scutata</i>              | Unknown | Pair   | Neotropical | -- | -- | -- |
| <i>Hellmayrea gularis</i>      | Unknown | Pair   | Neotropical | -- | -- | -- |
| <i>Cranioleuca erythroptis</i> | Pair    | Pair   | Neotropical | -- | -- | -- |
| <i>C. antisiensis</i>          | Unknown | Pair   | Neotropical | -- | -- | -- |
| <i>C. pallida</i>              | Unknown | Pair   | Neotropical | -- | -- | -- |
| <i>C. curtata</i>              | Unknown | Pair   | Neotropical | -- | -- | -- |
| <i>C. demissa</i>              | Unknown | Pair   | Neotropical | -- | -- | -- |
| <i>C. hellmayri</i>            | Unknown | Pair   | Neotropical | -- | -- | -- |
| <i>C. subcristata</i>          | Unknown | Pair   | Neotropical | -- | -- | -- |
| <i>C. pyrrhophia</i>           | Pair    | Pair   | Neotropical | -- | -- | -- |
| <i>C. obsoleta</i>             | Unknown | Pair   | Neotropical | -- | -- | -- |
| <i>C. marcapatae</i>           | Unknown | Pair   | Neotropical | -- | -- | -- |
| <i>C. albiceps</i>             | Unknown | Pair   | Neotropical | -- | -- | -- |
| <i>C. semicinerea</i>          | Unknown | Pair   | Neotropical | -- | -- | -- |
| <i>C. albicapilla</i>          | Unknown | Pair   | Neotropical | -- | -- | -- |
| <i>C. dissita</i>              | Subspp  | Subspp | Neotropical | -- | -- | -- |
| <i>C. vulpina</i>              | Unknown | Pair   | Neotropical | -- | -- | -- |
| <i>C. muelleri</i>             | Unknown | Pair   | Neotropical | -- | -- | -- |
| <i>C. gutturata</i>            | Unknown | Pair   | Neotropical | -- | -- | -- |
| <i>C. sulphurifera</i>         | Unknown | Pair   | Neotropical | -- | -- | -- |
| <i>Certhiaxis cinnamomea</i>   | Pair    | Pair   | Neotropical | -- | -- | -- |
| <i>C. mustelina</i>            | Unknown | Pair   | Neotropical | -- | -- | -- |
| <i>Asthenes pyrrholeuca</i>    | Unknown | Pair   | Neotropical | -- | -- | -- |
| <i>A. baeri</i>                | Pair    | Pair   | Neotropical | -- | -- | -- |
| <i>A. pudibunda</i>            | Unknown | Pair   | Neotropical | -- | -- | -- |
| <i>A. ottonis</i>              | Unknown | Pair   | Neotropical | -- | -- | -- |
| <i>A. heterura</i>             | Unknown | Pair   | Neotropical | -- | -- | -- |
| <i>A. cactorum</i>             | Unknown | Pair   | Neotropical | -- | -- | -- |
| <i>A. modesta</i>              | Unknown | Pair   | Neotropical | -- | -- | -- |
| <i>A. luizae</i>               | Unknown | Pair   | Neotropical | -- | -- | -- |
| <i>A. dorbignyi</i>            | Unknown | Pair   | Neotropical | -- | -- | -- |
| <i>A. berlepschi</i>           | Unknown | Pair   | Neotropical | -- | -- | -- |
| <i>A. steinbachi</i>           | Unknown | Pair   | Neotropical | -- | -- | -- |
| <i>A. humicola</i>             | Unknown | Pair   | Neotropical | -- | -- | -- |
| <i>A. patagonica</i>           | Unknown | Pair   | Neotropical | -- | -- | -- |
| <i>A. humilis</i>              | Unknown | Pair   | Neotropical | -- | -- | -- |
| <i>A. wyatti</i>               | Unknown | Pair   | Neotropical | -- | -- | -- |
| <i>A. sclateri</i>             | Unknown | Pair   | Neotropical | -- | -- | -- |
| <i>A. anthoides</i>            | Unknown | Pair   | Neotropical | -- | -- | -- |

|                                      |             |             |             |                 |    |                      |
|--------------------------------------|-------------|-------------|-------------|-----------------|----|----------------------|
| <i>A. urubambensis</i>               | Unknown     | Pair        | Neotropical | --              | -- | --                   |
| <i>A. flammulata</i>                 | Unknown     | Pair        | Neotropical | --              | -- | --                   |
| <i>A. virgata</i>                    | Unknown     | Pair        | Neotropical | --              | -- | --                   |
| <i>A. maculicauda</i>                | Unknown     | Pair        | Neotropical | --              | -- | --                   |
| <i>A. hudsoni</i>                    | Unknown     | Pair        | Neotropical | --              | -- | --                   |
| <i>Thripophaga cherriei</i>          | Unknown     | Pair        | Neotropical | --              | -- | --                   |
| <i>T. macroua</i>                    | Unknown     | Pair        | Neotropical | --              | -- | --                   |
| <i>T. berlepschi</i>                 | Unknown     | Pair        | Neotropical | --              | -- | --                   |
| <i>T. fusciceps</i>                  | Unknown     | Pair        | Neotropical | --              | -- | --                   |
| <i>Siptornopsis hypochondriacus</i>  | Unknown     | Pair        | Neotropical | --              | -- | --                   |
| <i>Phacellodomus rufifrons</i>       | Cooperation | Cooperation | Neotropical | [355]           | -- | --                   |
| <i>P. sibilatrix</i>                 | Suspected   | Cooperation | Neotropical | [350]           | -- | --                   |
| <i>P. striaticeps</i>                | Unknown     | Pair        | Neotropical | --              | -- | --                   |
| <i>P. striaticollis</i>              | Unknown     | Pair        | Neotropical | --              | -- | --                   |
| <i>P. ruber</i>                      | Unknown     | Pair        | Neotropical | --              | -- | --                   |
| <i>P. dorsalis</i>                   | Unknown     | Pair        | Neotropical | --              | -- | --                   |
| <i>P. erythropthalmus</i>            | Unknown     | Pair        | Neotropical | --              | -- | --                   |
| <i>Clibanornis dendrocolaptoides</i> | Unknown     | Pair        | Neotropical | --              | -- | --                   |
| <i>Spartonoica maluroides</i>        | Unknown     | Pair        | Neotropical | --              | -- | --                   |
| <i>Phleocryptes melanops</i>         | Pair        | Pair        | Neotropical | --              | -- | --                   |
| <i>Limnornis curvirostris</i>        | Unknown     | Pair        | Neotropical | --              | -- | --                   |
| <i>L. rectirostris</i>               | Pair        | Pair        | Neotropical | --              | -- | --                   |
| <i>Anumbius annumbi</i>              | Suspected   | Cooperation | Neotropical | --              | -- | --                   |
| <i>Coryphistera alaudina</i>         | Suspected   | Cooperation | Neotropical | [350, 356, 357] | -- | --                   |
| <i>Eremobius phoenicurus</i>         | Pair        | Pair        | Neotropical | [350]           | -- | --                   |
| <i>Siptornis striaticollis</i>       | Unknown     | Pair        | Neotropical | --              | -- | --                   |
| <i>Metopothrix aurantiacus</i>       | Unknown     | Pair        | Neotropical | --              | -- | --                   |
| <i>Xenerpestes minlosi</i>           | Unknown     | Pair        | Neotropical | --              | -- | --                   |
| <i>X. singularis</i>                 | Unknown     | Pair        | Neotropical | --              | -- | --                   |
| <i>Acrobatornis fonsecai</i>         | Cooperation | Cooperation | Neotropical | [350, 358]      | -- | [343, 344, 350, 358] |
| <i>Roraimia adusta</i>               | Unknown     | Pair        | Neotropical | [350]           | -- | [343, 344]           |
| <i>Premnornis guttuligera</i>        | Unknown     | Pair        | Neotropical | --              | -- | --                   |
| <i>Premnoplex brunnescens</i>        | Unknown     | Pair        | Neotropical | --              | -- | --                   |
| <i>P. tatei</i>                      | Unknown     | Pair        | Neotropical | --              | -- | --                   |
| <i>Margarornis rubiginosus</i>       | Unknown     | Pair        | Neotropical | --              | -- | --                   |
| <i>M. stellatus</i>                  | Unknown     | Pair        | Neotropical | --              | -- | --                   |
| <i>M. bellulus</i>                   | Unknown     | Pair        | Neotropical | --              | -- | --                   |
| <i>M. squamiger</i>                  | Unknown     | Pair        | Neotropical | --              | -- | --                   |
| <i>Lochmias nematura</i>             | Unknown     | Pair        | Neotropical | --              | -- | --                   |
| <i>Pseudoseisura cristata</i>        | Cooperation | Cooperation | Neotropical | [350, 359]      | -- | --                   |
| <i>P. lophotes</i>                   | Group       | Pair        | Neotropical | [350, 360]      | -- | --                   |
| <i>P. gutturalis</i>                 | Suspected   | Cooperation | Neotropical | [350, 361]      | -- | --                   |
| <i>Pseudocolaptes lawrencii</i>      | Pair        | Pair        | Neotropical | [350]           | -- | --                   |

|                                   |         |        |             |    |    |    |
|-----------------------------------|---------|--------|-------------|----|----|----|
| <i>P. boissonneautii</i>          | Unknown | Pair   | Neotropical | -- | -- | -- |
| <i>Berlepschia rikeri</i>         | Unknown | Pair   | Neotropical | -- | -- | -- |
| <i>Ancistrops strigilatus</i>     | Unknown | Pair   | Neotropical | -- | -- | -- |
| <i>Cichlocolaptes leucophrus</i>  | Unknown | Pair   | Neotropical | -- | -- | -- |
| <i>Hyloctistes subulatus</i>      | Unknown | Pair   | Neotropical | -- | -- | -- |
| <i>Syndactyla guttulata</i>       | Unknown | Pair   | Neotropical | -- | -- | -- |
| <i>S. subalaris</i>               | Unknown | Pair   | Neotropical | -- | -- | -- |
| <i>S. rufosuperciliata</i>        | Unknown | Pair   | Neotropical | -- | -- | -- |
| <i>S. ruficollis</i>              | Unknown | Pair   | Neotropical | -- | -- | -- |
| <i>Anabacerthia variegaticeps</i> | Unknown | Pair   | Neotropical | -- | -- | -- |
| <i>A. striaticollis</i>           | Unknown | Pair   | Neotropical | -- | -- | -- |
| <i>Philydor ruficaudatus</i>      | Unknown | Pair   | Neotropical | -- | -- | -- |
| <i>P. pyrrhodes</i>               | Unknown | Pair   | Neotropical | -- | -- | -- |
| <i>P. dimidiatus</i>              | Unknown | Pair   | Neotropical | -- | -- | -- |
| <i>P. fuscipennis</i>             | Unknown | Pair   | Neotropical | -- | -- | -- |
| <i>P. erythrocerus</i>            | Unknown | Pair   | Neotropical | -- | -- | -- |
| <i>P. ochrogaster</i>             | Subspp  | Subspp | Neotropical | -- | -- | -- |
| <i>P. erythropterus</i>           | Unknown | Pair   | Neotropical | -- | -- | -- |
| <i>P. amaurotis</i>               | Unknown | Pair   | Neotropical | -- | -- | -- |
| <i>P. lichtensteini</i>           | Unknown | Pair   | Neotropical | -- | -- | -- |
| <i>P. rufus</i>                   | Unknown | Pair   | Neotropical | -- | -- | -- |
| <i>P. atricapillus</i>            | Unknown | Pair   | Neotropical | -- | -- | -- |
| <i>P. novaesi</i>                 | Unknown | Pair   | Neotropical | -- | -- | -- |
| <i>Simoxenops ucayalae</i>        | Unknown | Pair   | Neotropical | -- | -- | -- |
| <i>S. striatus</i>                | Unknown | Pair   | Neotropical | -- | -- | -- |
| <i>Anabazenops fuscus</i>         | Unknown | Pair   | Neotropical | -- | -- | -- |
| <i>Thripadectes ignobilis</i>     | Pair    | Pair   | Neotropical | -- | -- | -- |
| <i>T. rufobrunneus</i>            | Pair    | Pair   | Neotropical | -- | -- | -- |
| <i>T. virgaticeps</i>             | Unknown | Pair   | Neotropical | -- | -- | -- |
| <i>T. melanorhynchus</i>          | Unknown | Pair   | Neotropical | -- | -- | -- |
| <i>T. holostictus</i>             | Unknown | Pair   | Neotropical | -- | -- | -- |
| <i>T. flammulatus</i>             | Unknown | Pair   | Neotropical | -- | -- | -- |
| <i>T. scrutator</i>               | Unknown | Pair   | Neotropical | -- | -- | -- |
| <i>Automolus ochrolaemus</i>      | Pair    | Pair   | Neotropical | -- | -- | -- |
| <i>A. dorsalis</i>                | Unknown | Pair   | Neotropical | -- | -- | -- |
| <i>A. infuscatus</i>              | Unknown | Pair   | Neotropical | -- | -- | -- |
| <i>A. leucophthalmus</i>          | Unknown | Pair   | Neotropical | -- | -- | -- |
| <i>A. roraimae</i>                | Unknown | Pair   | Neotropical | -- | -- | -- |
| <i>A. melanopezus</i>             | Unknown | Pair   | Neotropical | -- | -- | -- |
| <i>A. rubiginosus</i>             | Pair    | Pair   | Neotropical | -- | -- | -- |
| <i>A. rufipileatus</i>            | Unknown | Pair   | Neotropical | -- | -- | -- |
| <i>Hylocryptus rectirostris</i>   | Unknown | Pair   | Neotropical | -- | -- | -- |
| <i>H. erythrocephalus</i>         | Unknown | Pair   | Neotropical | -- | -- | -- |

|                                 |             |             |             |            |            |            |
|---------------------------------|-------------|-------------|-------------|------------|------------|------------|
| <i>Heliobletus contaminatus</i> | Unknown     | Pair        | Neotropical | --         | --         | --         |
| <i>Xenops milleri</i>           | Unknown     | Pair        | Neotropical | --         | --         | --         |
| <i>X. tenuirostris</i>          | Unknown     | Pair        | Neotropical | --         | --         | --         |
| <i>X. minutus</i>               | Pair        | Pair        | Neotropical | --         | --         | --         |
| <i>X. rutilans</i>              | Unknown     | Pair        | Neotropical | --         | --         | --         |
| <i>Megaxenops parnaguae</i>     | Unknown     | Pair        | Neotropical | --         | --         | --         |
| <i>Pygarrhichas albogularis</i> | Unknown     | Pair        | Neotropical | --         | --         | --         |
| <b>Tyrannida: Cotingidae</b>    |             |             |             |            |            |            |
| <i>Phoenicircus nigricollis</i> | Female only | Female only | Neotropical | [362]      | bbdbbabbaa | [343, 344] |
| <i>P. carnifex</i>              | Female only | Female only | Neotropical | --         | --         | --         |
| <i>Phibalura flavirostris</i>   | Pair        |             | Neotropical | [362, 363] | --         | --         |
| <i>Tijuca atra</i>              | Unknown     | Pair        | Neotropical | [362]      | --         | --         |
| <i>T. condita</i>               | Unknown     | Pair        | Neotropical | --         | --         | --         |
| <i>Carpornis cucullatus</i>     | Unknown     | Pair        | Neotropical | --         | --         | --         |
| <i>C. melanocephalus</i>        | Unknown     | Pair        | Neotropical | --         | --         | --         |
| <i>Doliornis sclateri</i>       | Unknown     | Pair        | Neotropical | --         | --         | --         |
| <i>Ampelion rubrocristata</i>   | Unknown     | Pair        | Neotropical | --         | --         | --         |
| <i>A. rufaxilla</i>             | Unknown     | Pair        | Neotropical | --         | --         | --         |
| <i>Zaratornis stresemanni</i>   | Pair        | Pair        | Neotropical | --         | --         | --         |
| <i>Pipreola riefferii</i>       | Pair        | Pair        | Neotropical | [79, 362]  | --         | --         |
| <i>P. intermedia</i>            | Unknown     | Pair        | Neotropical | [362]      | --         | --         |
| <i>P. arcuata</i>               | Unknown     | Pair        | Neotropical | --         | --         | --         |
| <i>P. aureopectus</i>           | Unknown     | Pair        | Neotropical | --         | --         | --         |
| <i>P. jucunda</i>               | Pair        | Pair        | Neotropical | [362, 364] | --         | --         |
| <i>P. lubomirskii</i>           | Unknown     | Pair        | Neotropical | [362]      | --         | --         |
| <i>P. pulchra</i>               | Unknown     | Pair        | Neotropical | --         | --         | --         |
| <i>P. chlorolepidota</i>        | Unknown     | Pair        | Neotropical | --         | --         | --         |
| <i>P. frontalis</i>             | Unknown     | Pair        | Neotropical | --         | --         | --         |
| <i>P. formosa</i>               | Unknown     | Pair        | Neotropical | --         | --         | --         |
| <i>P. whitelyi</i>              | Unknown     | Pair        | Neotropical | --         | --         | --         |
| <i>Ampelioides tschudii</i>     | Pair        | Pair        | Neotropical | --         | --         | --         |
| <i>Iodopleura pipra</i>         | Unknown     | Pair        | Neotropical | --         | --         | --         |
| <i>I. isabellae</i>             | Unknown     | Pair        | Neotropical | --         | --         | --         |
| <i>I. fusca</i>                 | Pair        | Pair        | Neotropical | --         | --         | --         |
| <i>Calyptura cristata</i>       | Unknown     | Pair        | Neotropical | --         | --         | --         |
| <i>Lipaugus subalaris</i>       | Unknown     | Pair        | Neotropical | --         | --         | --         |
| <i>L. cryptolophus</i>          | Unknown     | Pair        | Neotropical | --         | --         | --         |
| <i>L. fuscocinereus</i>         | Unknown     | Female only | Neotropical | [362, 365] | --         | --         |
| <i>L. uropygialis</i>           | Unknown     | Female only | Neotropical | [362]      | --         | --         |
| <i>L. vociferans</i>            | Female only | Female only | Neotropical | --         | --         | --         |
| <i>L. unirufus</i>              | Female only | Female only | Neotropical | --         | --         | --         |
| <i>L. lanioides</i>             | Female only | Female only | Neotropical | [362, 366] | --         | --         |
| <i>L. streptophorus</i>         | Unknown     | Female only | Neotropical | [362]      | --         | --         |

|                                    |             |             |             |            |            |            |
|------------------------------------|-------------|-------------|-------------|------------|------------|------------|
| <i>Porphyrolaema porphyrolaema</i> | Unknown     | Pair        | Neotropical | --         | --         | --         |
| <i>Cotinga amabilis</i>            | Unknown     | Female only | Neotropical | --         | --         | --         |
| <i>C. ridgwayi</i>                 | Unknown     | Female only | Neotropical | --         | --         | --         |
| <i>C. nattererii</i>               | Unknown     | Female only | Neotropical | --         | --         | --         |
| <i>C. maynana</i>                  | Unknown     | Female only | Neotropical | --         | --         | --         |
| <i>C. cotinga</i>                  | Unknown     | Female only | Neotropical | --         | --         | --         |
| <i>C. maculata</i>                 | Unknown     | Female only | Neotropical | --         | --         | --         |
| <i>C. cayana</i>                   | Unknown     | Female only | Neotropical | --         | --         | --         |
| <i>Xipholena punicea</i>           | Female only | Female only | Neotropical | --         | --         | --         |
| <i>X. lamellipennis</i>            | Unknown     | Female only | Neotropical | --         | --         | --         |
| <i>X. atropurpurea</i>             | Unknown     | Female only | Neotropical | --         | --         | --         |
| <i>Carpodectes nitidus</i>         | Unknown     | Female only | Neotropical | --         | --         | --         |
| <i>C. antoniae</i>                 | Unknown     | Female only | Neotropical | --         | --         | --         |
| <i>C. hopkei</i>                   | Unknown     | Female only | Neotropical | --         | --         | --         |
| <i>Conioptilon mcilhennyi</i>      | Pair        | Pair        | Neotropical | --         | --         | --         |
| <i>Gymnoderus foetidus</i>         | Female only | Female only | Neotropical | [79, 362]  | --         | --         |
| <i>Haematoderus militaris</i>      | Unknown     | Female only | Neotropical | [362]      | --         | --         |
| <i>Querula purpurata</i>           | Cooperation | Cooperation | Neotropical | --         | --         | --         |
| <i>Pyroderus scutatus</i>          | Female only | Female only | Neotropical | --         | --         | --         |
| <i>Cephalopterus glabricollis</i>  | Female only | Female only | Neotropical | --         | --         | --         |
| <i>C. penduliger</i>               | Female only | Female only | Neotropical | --         | --         | --         |
| <i>C. ornatus</i>                  | Female only | Female only | Neotropical | --         | --         | --         |
| <i>Perissocephalus tricolor</i>    | Female only | Female only | Neotropical | --         | --         | --         |
| <i>Procnias tricarunculata</i>     | Female only | Female only | Neotropical | --         | --         | --         |
| <i>P. alba</i>                     | Female only | Female only | Neotropical | --         | --         | --         |
| <i>P. averano</i>                  | Female only | Female only | Neotropical | --         | --         | --         |
| <i>P. nudicollis</i>               | Unknown     | Female only | Neotropical | --         | --         | --         |
| <i>Rupicola rupicola</i>           | Female only | Female only | Neotropical | --         | --         | --         |
| <i>R. peruviana</i>                | Female only | Female only | Neotropical | --         | --         | --         |
| <i>Phytotoma raimondii</i>         | Unknown     | Pair        | Neotropical | [367]      | --         | --         |
| <i>P. rutila</i>                   | Pair        | Pair        | Neotropical | --         | --         | --         |
| <i>P. rara</i>                     | Unknown     | Pair        | Neotropical | --         | --         | --         |
| <b>Tyrannida: Oxyruncidae</b>      |             |             |             |            |            |            |
| <i>Oxyruncus cristatus</i>         | Female only | Female only | Neotropical | [368]      | bbdbbabb   | [343, 344] |
| <b>Tyrannida: Tityridae</b>        |             |             |             |            |            |            |
| <i>Laniocera rufescens</i>         | Unknown     | Female only | Neotropical | [369]      | bbdbbabbca | [343, 344] |
| <i>L. hypopyrra</i>                | Female only | Female only | Neotropical | [369, 370] | --         | --         |
| <i>Schiffornis major</i>           | Unknown     | Pair        | Neotropical | [338]      | --         | --         |
| <i>S. turdinus</i>                 | Unknown     | Pair        | Neotropical | --         | --         | --         |
| <i>S. virescens</i>                | Unknown     | Pair        | Neotropical | --         | --         | --         |
| <i>Xenopsaris albinucha</i>        | Unknown     | Pair        | Neotropical | [369]      | --         | --         |
| <i>Pachyrhamphus viridis</i>       | Pair        | Pair        | Neotropical | --         | --         | --         |
| <i>P. versicolor</i>               | Unknown     | Pair        | Neotropical | --         | --         | --         |

|                          |         |      |             |            |    |    |
|--------------------------|---------|------|-------------|------------|----|----|
| <i>P. cinnamomeus</i>    | Pair    | Pair | Neotropical | [369, 371] | -- | -- |
| <i>P. castaneus</i>      | Unknown | Pair | Neotropical | [369]      | -- | -- |
| <i>P. polychopterus</i>  | Pair    | Pair | Neotropical | [369, 371] | -- | -- |
| <i>P. major</i>          | Pair    | Pair | Neotropical | [369]      | -- | -- |
| <i>P. albogriseus</i>    | Pair    | Pair | Neotropical | --         | -- | -- |
| <i>P. marginatus</i>     | Unknown | Pair | Neotropical | --         | -- | -- |
| <i>P. surinamus</i>      | Unknown | Pair | Neotropical | --         | -- | -- |
| <i>P. rufus</i>          | Pair    | Pair | Neotropical | --         | -- | -- |
| <i>P. spodiurus</i>      | Unknown | Pair | Neotropical | --         | -- | -- |
| <i>P. aglaiae</i>        | Pair    | Pair | Neotropical | --         | -- | -- |
| <i>P. homochrous</i>     | Unknown | Pair | Neotropical | --         | -- | -- |
| <i>P. minor</i>          | Unknown | Pair | Neotropical | --         | -- | -- |
| <i>P. niger</i>          | Pair    | Pair | Neotropical | --         | -- | -- |
| <i>P. validus</i>        | Unknown | Pair | Neotropical | --         | -- | -- |
| <i>Tityra cayana</i>     | Unknown | Pair | Neotropical | --         | -- | -- |
| <i>T. semifasciata</i>   | Pair    | Pair | Neotropical | --         | -- | -- |
| <i>T. inquisitor</i>     | Pair    | Pair | Neotropical | --         | -- | -- |
| <i>Laniisoma elegans</i> | Pair    | Pair | Neotropical | [362]      | -- | -- |

**Tyrannida: Pipridae**

|                             |             |             |             |            |           |            |
|-----------------------------|-------------|-------------|-------------|------------|-----------|------------|
| <i>Pipra aureola</i>        | Female only | Female only | Neotropical | [338]      | bbdbbbbbc | [343, 344] |
| <i>P. fasciicauda</i>       | Female only | Female only | Neotropical | --         | --        | --         |
| <i>P. filicauda</i>         | Female only | Female only | Neotropical | --         | --        | --         |
| <i>P. mentalis</i>          | Female only | Female only | Neotropical | --         | --        | --         |
| <i>P. erythrocephala</i>    | Female only | Female only | Neotropical | --         | --        | --         |
| <i>P. rubrocapilla</i>      | Female only | Female only | Neotropical | --         | --        | --         |
| <i>P. chloromeros</i>       | Female only | Female only | Neotropical | --         | --        | --         |
| <i>P. cornuta</i>           | Female only | Female only | Neotropical | --         | --        | --         |
| <i>P. pipra</i>             | Female only | Female only | Neotropical | --         | --        | --         |
| <i>P. coronata</i>          | Female only | Female only | Neotropical | --         | --        | --         |
| <i>P. suavissima</i>        | Female only | Female only | Neotropical | --         | --        | --         |
| <i>P. serena</i>            | Female only | Female only | Neotropical | --         | --        | --         |
| <i>P. iris</i>              | Female only | Female only | Neotropical | --         | --        | --         |
| <i>P. vilasboasi</i>        | Unknown     | Female only | Neotropical | --         | --        | --         |
| <i>P. nattereri</i>         | Unknown     | Female only | Neotropical | --         | --        | --         |
| <i>P. isidorei</i>          | Female only | Female only | Neotropical | --         | --        | --         |
| <i>P. coeruleocapilla</i>   | Female only | Female only | Neotropical | --         | --        | --         |
| <i>Antilophia galeata</i>   | Female only | Female only | Neotropical | [338, 372] | --        | --         |
| <i>Chiroxiphia linearis</i> | Female only | Female only | Neotropical | [338]      | --        | --         |
| <i>C. lanceolata</i>        | Female only | Female only | Neotropical | --         | --        | --         |
| <i>C. pareola</i>           | Female only | Female only | Neotropical | --         | --        | --         |
| <i>C. boliviana</i>         | Unknown     | Female only | Neotropical | --         | --        | --         |
| <i>C. caudata</i>           | Female only | Female only | Neotropical | --         | --        | --         |
| <i>Masius chrysopterus</i>  | Female only | Female only | Neotropical | --         | --        | --         |



|                                    |             |             |             |                 |           |            |
|------------------------------------|-------------|-------------|-------------|-----------------|-----------|------------|
| <i>Ilicura militaris</i>           | Female only | Female only | Neotropical | --              | --        | --         |
| <i>Corapipo gutturalis</i>         | Female only | Female only | Neotropical | --              | --        | --         |
| <i>C. altera</i>                   | Subsp       | Subsp       | Neotropical | --              | --        | --         |
| <i>C. leucorrhoa</i>               | Female only | Female only | Neotropical | --              | --        | --         |
| <i>Manacus candei</i>              | Female only | Female only | Neotropical | --              | --        | --         |
| <i>M. aurantiacus</i>              | Female only | Female only | Neotropical | --              | --        | --         |
| <i>M. vitellinus</i>               | Female only | Female only | Neotropical | --              | --        | --         |
| <i>M. manacus</i>                  | Female only | Female only | Neotropical | --              | --        | --         |
| <i>Machaeropterus pyrocephalus</i> | Female only | Female only | Neotropical | --              | --        | --         |
| <i>M. regulus</i>                  | Female only | Female only | Neotropical | --              | --        | --         |
| <i>M. deliciosus</i>               | Female only | Female only | Neotropical | --              | --        | --         |
| <i>Xenopipo atronitens</i>         | Unknown     | Female only | Neotropical | --              | --        | --         |
| <i>Chloropipo unicolor</i>         | Unknown     | Female only | Neotropical | --              | --        | --         |
| <i>C. uniformis</i>                | Unknown     | Female only | Neotropical | --              | --        | --         |
| <i>C. holochlora</i>               | Unknown     | Female only | Neotropical | --              | --        | --         |
| <i>C. flavicapilla</i>             | Unknown     | Female only | Neotropical | --              | --        | --         |
| <i>Heterocercus flavivertex</i>    | Female only | Female only | Neotropical | --              | --        | --         |
| <i>H. aurantiivertex</i>           | Female only | Female only | Neotropical | --              | --        | --         |
| <i>H. linteatus</i>                | Unknown     | Female only | Neotropical | --              | --        | --         |
| <i>Neopelma chrysocephalum</i>     | Female only | Female only | Neotropical | --              | --        | --         |
| <i>N. sulphureiventer</i>          | Unknown     | Female only | Neotropical | --              | --        | --         |
| <i>N. pallezens</i>                | Unknown     | Female only | Neotropical | --              | --        | --         |
| <i>N. aurifrons</i>                | Unknown     | Female only | Neotropical | --              | --        | --         |
| <i>Tyranneutes stolzmanni</i>      | Unknown     | Female only | Neotropical | --              | --        | --         |
| <i>T. virescens</i>                | Unknown     | Female only | Neotropical | --              | --        | --         |
| <i>Piprites pileatus</i>           | Unknown     | Female only | Neotropical | --              | --        | --         |
| <i>P. griseiceps</i>               | Unknown     | Female only | Neotropical | --              | --        | --         |
| <i>P. chloris</i>                  | Unknown     | Female only | Neotropical | --              | --        | --         |
| <b>Tyrannida: Pipromorphidae</b>   |             |             |             |                 |           |            |
| <i>Mionectes striaticollis</i>     | Female only | Female only | Neotropical | [369]           | bbdbbbbbd | [343, 344] |
| <i>M. olivaceus</i>                | Female only | Female only | Neotropical | [369, 373]      | --        | --         |
| <i>M. oleagineus</i>               | Female only | Female only | Neotropical | [369, 374, 375] | --        | --         |
| <i>M. macconnelli</i>              | Female only | Female only | Neotropical | [369, 376]      | --        | --         |
| <i>M. rufiventris</i>              | Female only | Female only | Neotropical | [369]           | --        | --         |
| <i>Leptopogon rufipectus</i>       | Unknown     | Pair        | Neotropical | --              | --        | --         |
| <i>L. taczanowskii</i>             | Unknown     | Pair        | Neotropical | --              | --        | --         |
| <i>L. amaurocephalus</i>           | Unknown     | Pair        | Neotropical | [79, 369, 377]  | --        | --         |
| <i>L. superciliaris</i>            | Unknown     | Pair        | Neotropical | [79, 369, 378]  | --        | --         |
| <i>Pseudotriccus pelzelni</i>      | Unknown     | Pair        | Neotropical | [369]           | --        | --         |
| <i>P. simplex</i>                  | Unknown     | Pair        | Neotropical | --              | --        | --         |
| <i>P. ruficeps</i>                 | Unknown     | Pair        | Neotropical | --              | --        | --         |
| <i>Poecilotriccus ruficeps</i>     | Unknown     | Pair        | Neotropical | --              | --        | --         |
| <i>P. capitalis</i>                | Unknown     | Pair        | Neotropical | --              | --        | --         |

|                              |         |        |             |                 |            |            |
|------------------------------|---------|--------|-------------|-----------------|------------|------------|
| <i>P. albifacies</i>         | Unknown | Pair   | Neotropical | --              | --         | --         |
| <i>Taeniotriccus andrei</i>  | Unknown | Pair   | Neotropical | --              | --         | --         |
| <i>Hemitriccus minor</i>     | Unknown | Pair   | Neotropical | --              | --         | --         |
| <i>H. josephinae</i>         | Unknown | Pair   | Neotropical | --              | --         | --         |
| <i>H. flammulatus</i>        | Unknown | Pair   | Neotropical | --              | --         | --         |
| <i>H. diops</i>              | Unknown | Pair   | Neotropical | --              | --         | --         |
| <i>H. obsoletus</i>          | Unknown | Pair   | Neotropical | --              | --         | --         |
| <i>H. zosterops</i>          | Unknown | Pair   | Neotropical | --              | --         | --         |
| <i>H. minimus</i>            | Unknown | Pair   | Neotropical | --              | --         | --         |
| <i>H. orbitatus</i>          | Unknown | Pair   | Neotropical | --              | --         | --         |
| <i>H. iohannis</i>           | Unknown | Pair   | Neotropical | --              | --         | --         |
| <i>H. striaticollis</i>      | Unknown | Pair   | Neotropical | --              | --         | --         |
| <i>H. nidipendulus</i>       | Unknown | Pair   | Neotropical | --              | --         | --         |
| <i>H. spodiops</i>           | Unknown | Pair   | Neotropical | --              | --         | --         |
| <i>H. margaritaceiventer</i> | Pair    | Pair   | Neotropical | --              | --         | --         |
| <i>H. inornatus</i>          | Unknown | Pair   | Neotropical | --              | --         | --         |
| <i>H. granadensis</i>        | Unknown | Pair   | Neotropical | --              | --         | --         |
| <i>H. rufularis</i>          | Unknown | Pair   | Neotropical | --              | --         | --         |
| <i>H. cinnamomeipectus</i>   | Unknown | Pair   | Neotropical | --              | --         | --         |
| <i>H. mirandae</i>           | Unknown | Pair   | Neotropical | --              | --         | --         |
| <i>H. kaempferi</i>          | Pair    | Pair   | Neotropical | [369, 379, 380] | --         | --         |
| <i>H. furcatus</i>           | Unknown | Pair   | Neotropical | [369]           | --         | --         |
| <i>Todirostrum senex</i>     | Unknown | Pair   | Neotropical | --              | --         | --         |
| <i>T. russatum</i>           | Unknown | Pair   | Neotropical | --              | --         | --         |
| <i>T. plumbeiceps</i>        | Unknown | Pair   | Neotropical | --              | --         | --         |
| <i>T. latirostre</i>         | Unknown | Pair   | Neotropical | --              | --         | --         |
| <i>T. fumifrons</i>          | Unknown | Pair   | Neotropical | --              | --         | --         |
| <i>T. sylvia</i>             | Pair    | Pair   | Neotropical | --              | --         | --         |
| <i>T. maculatum</i>          | Pair    | Pair   | Neotropical | [369, 381]      | --         | --         |
| <i>T. poliocephalum</i>      | Unknown | Pair   | Neotropical | [369]           | --         | --         |
| <i>T. cinereum</i>           | Pair    | Pair   | Neotropical | [369, 381, 382] | --         | --         |
| <i>T. viridanum</i>          | Unknown | Pair   | Neotropical | [369]           | --         | --         |
| <i>T. nigriceps</i>          | Pair    | Pair   | Neotropical | [369, 378]      | --         | --         |
| <i>T. pictum</i>             | Pair    | Pair   | Neotropical | [369]           | --         | --         |
| <i>T. chrysocrotaphum</i>    | Unknown | Pair   | Neotropical | --              | --         | --         |
| <i>T. calopterum</i>         | Unknown | Pair   | Neotropical | --              | --         | --         |
| <i>T. pulchellum</i>         | Unknown | Pair   | Neotropical | --              | --         | --         |
| <i>Corythopsis torquata</i>  | Pair    | Pair   | Neotropical | --              | --         | --         |
| <i>C. delalandi</i>          | Pair    | Pair   | Neotropical | --              | --         | --         |
| <b>Tyrannida: Tyrannidae</b> |         |        |             |                 |            |            |
| <i>Phyllomyias fasciatus</i> | Unknown | Pair   | Neotropical | [369]           | bbdbbabbdd | [343, 344] |
| <i>P. zeledoni</i>           | Subspp  | Subspp | Neotropical | [79]            | --         | --         |
| <i>P. burmeisteri</i>        | Unknown | Pair   | Neotropical | [369]           | --         | --         |

|                                 |         |        |             |            |    |    |
|---------------------------------|---------|--------|-------------|------------|----|----|
| <i>P. reiseri</i>               | Unknown | Pair   | Neotropical | --         | -- | -- |
| <i>P. virescens</i>             | Unknown | Pair   | Neotropical | --         | -- | -- |
| <i>P. sclateri</i>              | Unknown | Pair   | Neotropical | --         | -- | -- |
| <i>P. griseocapilla</i>         | Unknown | Pair   | Neotropical | --         | -- | -- |
| <i>P. griseiceps</i>            | Pair    | Pair   | Neotropical | [369, 370] | -- | -- |
| <i>P. plumbeiceps</i>           | Unknown | Pair   | Neotropical | [369]      | -- | -- |
| <i>P. nigrocapillus</i>         | Unknown | Pair   | Neotropical | --         | -- | -- |
| <i>P. cinereiceps</i>           | Unknown | Pair   | Neotropical | --         | -- | -- |
| <i>P. uropygialis</i>           | Unknown | Pair   | Neotropical | --         | -- | -- |
| <i>Zimmerius vilissimus</i>     | Pair    | Pair   | Neotropical | [369, 381] | -- | -- |
| <i>Z. improbus</i>              | Unknown | Pair   | Neotropical | [369]      | -- | -- |
| <i>Z. bolivianus</i>            | Unknown | Pair   | Neotropical | --         | -- | -- |
| <i>Z. cinereicapillus</i>       | Unknown | Pair   | Neotropical | --         | -- | -- |
| <i>Z. gracilipes</i>            | Unknown | Pair   | Neotropical | --         | -- | -- |
| <i>Z. chrysops</i>              | Unknown | Pair   | Neotropical | --         | -- | -- |
| <i>Z. viridiflavus</i>          | Unknown | Pair   | Neotropical | --         | -- | -- |
| <i>Ornithion inerme</i>         | Unknown | Pair   | Neotropical | --         | -- | -- |
| <i>O. semiflavum</i>            | Unknown | Pair   | Neotropical | --         | -- | -- |
| <i>O. brunneicapillum</i>       | Pair    | Pair   | Neotropical | [369, 370] | -- | -- |
| <i>Camptostoma imberbe</i>      | Pair    | Pair   | Neotropical | [369]      | -- | -- |
| <i>C. obsoletum</i>             | Pair    | Pair   | Neotropical | --         | -- | -- |
| <i>Phaeomyias murina</i>        | Pair    | Pair   | Neotropical | --         | -- | -- |
| <i>Nesotriccus ridgwayi</i>     | Pair    | Pair   | Neotropical | --         | -- | -- |
| <i>Capsiempis flaveola</i>      | Pair    | Pair   | Neotropical | [369, 383] | -- | -- |
| <i>Sublegatus arenarum</i>      | Pair    | Pair   | Neotropical | [369]      | -- | -- |
| <i>S. obscurior</i>             | Unknown | Pair   | Neotropical | --         | -- | -- |
| <i>S. modestus</i>              | Pair    | Pair   | Neotropical | --         | -- | -- |
| <i>Suiriri affinis</i>          | Subspp  | Subspp | Neotropical | --         | -- | -- |
| <i>S. suiriri</i>               | Unknown | Pair   | Neotropical | --         | -- | -- |
| <i>Tyrannulus elatus</i>        | Pair    | Pair   | Neotropical | --         | -- | -- |
| <i>Myiopagis gaimardii</i>      | Pair    | Pair   | Neotropical | --         | -- | -- |
| <i>M. caniceps</i>              | Pair    | Pair   | Neotropical | --         | -- | -- |
| <i>M. subplacens</i>            | Unknown | Pair   | Neotropical | --         | -- | -- |
| <i>M. flavivertex</i>           | Unknown | Pair   | Neotropical | --         | -- | -- |
| <i>M. cotta</i>                 | Pair    | Pair   | Neotropical | --         | -- | -- |
| <i>M. viridicata</i>            | Pair    | Pair   | Neotropical | --         | -- | -- |
| <i>Pseudelaenia leucospodia</i> | Pair    | Pair   | Neotropical | --         | -- | -- |
| <i>Elaenia martinica</i>        | Pair    | Pair   | Neotropical | --         | -- | -- |
| <i>E. flavogaster</i>           | Pair    | Pair   | Neotropical | --         | -- | -- |
| <i>E. spectabilis</i>           | Pair    | Pair   | Neotropical | --         | -- | -- |
| <i>E. ridleyana</i>             | Unknown | Pair   | Neotropical | --         | -- | -- |
| <i>E. albiceps</i>              | Unknown | Pair   | Neotropical | --         | -- | -- |
| <i>E. parvirostris</i>          | Pair    | Pair   | Neotropical | --         | -- | -- |

|                                  |         |      |             |            |    |    |
|----------------------------------|---------|------|-------------|------------|----|----|
| <i>E. strepera</i>               | Pair    | Pair | Neotropical | --         | -- | -- |
| <i>E. mesoleuca</i>              | Pair    | Pair | Neotropical | --         | -- | -- |
| <i>E. gigas</i>                  | Unknown | Pair | Neotropical | --         | -- | -- |
| <i>E. pelzelni</i>               | Unknown | Pair | Neotropical | --         | -- | -- |
| <i>E. cristata</i>               | Unknown | Pair | Neotropical | --         | -- | -- |
| <i>E. ruficeps</i>               | Unknown | Pair | Neotropical | --         | -- | -- |
| <i>E. chiriquensis</i>           | Pair    | Pair | Neotropical | --         | -- | -- |
| <i>E. frantzii</i>               | Pair    | Pair | Neotropical | --         | -- | -- |
| <i>E. obscura</i>                | Unknown | Pair | Neotropical | --         | -- | -- |
| <i>E. dayi</i>                   | Unknown | Pair | Neotropical | --         | -- | -- |
| <i>E. pallatangae</i>            | Unknown | Pair | Neotropical | --         | -- | -- |
| <i>E. fallax</i>                 | Pair    | Pair | Neotropical | --         | -- | -- |
| <i>Mecocerculus leucophrys</i>   | Unknown | Pair | Neotropical | --         | -- | -- |
| <i>M. poecilocercus</i>          | Unknown | Pair | Neotropical | --         | -- | -- |
| <i>M. hellmayri</i>              | Unknown | Pair | Neotropical | --         | -- | -- |
| <i>M. calopterus</i>             | Unknown | Pair | Neotropical | --         | -- | -- |
| <i>M. minor</i>                  | Unknown | Pair | Neotropical | --         | -- | -- |
| <i>M. stictopterus</i>           | Pair    | Pair | Neotropical | --         | -- | -- |
| <i>Serpophaga cinerea</i>        | Pair    | Pair | Neotropical | [369, 381] | -- | -- |
| <i>S. nigricans</i>              | Unknown | Pair | Neotropical | [369]      | -- | -- |
| <i>S. hypoleuca</i>              | Pair    | Pair | Neotropical | --         | -- | -- |
| <i>S. subcristata</i>            | Pair    | Pair | Neotropical | --         | -- | -- |
| <i>S. munda</i>                  | Pair    | Pair | Neotropical | --         | -- | -- |
| <i>Inezia tenuirostris</i>       | Unknown | Pair | Neotropical | --         | -- | -- |
| <i>I. inornata</i>               | Unknown | Pair | Neotropical | --         | -- | -- |
| <i>I. subflava</i>               | Unknown | Pair | Neotropical | --         | -- | -- |
| <i>Stigmatura napensis</i>       | Unknown | Pair | Neotropical | --         | -- | -- |
| <i>S. budytoides</i>             | Pair    | Pair | Neotropical | --         | -- | -- |
| <i>Uromyias agilis</i>           | Unknown | Pair | Neotropical | [384]      | -- | -- |
| <i>U. agraphia</i>               | Unknown | Pair | Neotropical | --         | -- | -- |
| <i>Anairetes alpinus</i>         | Unknown | Pair | Neotropical | [369]      | -- | -- |
| <i>A. nigrocristatus</i>         | Unknown | Pair | Neotropical | --         | -- | -- |
| <i>A. reguloides</i>             | Unknown | Pair | Neotropical | --         | -- | -- |
| <i>A. flavirostris</i>           | Pair    | Pair | Neotropical | --         | -- | -- |
| <i>A. fernandezianus</i>         | Unknown | Pair | Neotropical | --         | -- | -- |
| <i>A. parulus</i>                | Pair    | Pair | Neotropical | --         | -- | -- |
| <i>Tachuris rubrigastra</i>      | Unknown | Pair | Neotropical | --         | -- | -- |
| <i>Culicivora caudacuta</i>      | Unknown | Pair | Neotropical | --         | -- | -- |
| <i>Polystictus pectoralis</i>    | Unknown | Pair | Neotropical | --         | -- | -- |
| <i>P. superciliaris</i>          | Unknown | Pair | Neotropical | --         | -- | -- |
| <i>Pseudocolopteryx sclateri</i> | Pair    | Pair | Neotropical | --         | -- | -- |
| <i>P. acutipennis</i>            | Pair    | Pair | Neotropical | --         | -- | -- |
| <i>P. dinellianus</i>            | Unknown | Pair | Neotropical | --         | -- | -- |

|                                   |             |             |             |            |    |    |
|-----------------------------------|-------------|-------------|-------------|------------|----|----|
| <i>P. flaviventris</i>            | Pair        | Pair        | Neotropical | --         | -- | -- |
| <i>Euscarthmus meloryphus</i>     | Pair        | Pair        | Neotropical | --         | -- | -- |
| <i>E. rufomarginatus</i>          | Unknown     | Pair        | Neotropical | --         | -- | -- |
| <i>Phylloscartes ophthalmicus</i> | Unknown     | Pair        | Neotropical | --         | -- | -- |
| <i>P. venezuelanus</i>            | Unknown     | Pair        | Neotropical | --         | -- | -- |
| <i>P. lanyoni</i>                 | Unknown     | Pair        | Neotropical | --         | -- | -- |
| <i>P. orbitalis</i>               | Unknown     | Pair        | Neotropical | --         | -- | -- |
| <i>P. poecilotis</i>              | Unknown     | Pair        | Neotropical | --         | -- | -- |
| <i>P. eximius</i>                 | Unknown     | Pair        | Neotropical | --         | -- | -- |
| <i>P. nigrifrons</i>              | Unknown     | Pair        | Neotropical | --         | -- | -- |
| <i>P. chapmani</i>                | Unknown     | Pair        | Neotropical | --         | -- | -- |
| <i>P. gualaquizae</i>             | Unknown     | Pair        | Neotropical | --         | -- | -- |
| <i>P. flaviventris</i>            | Unknown     | Pair        | Neotropical | --         | -- | -- |
| <i>P. roquettei</i>               | Pair        | Pair        | Neotropical | --         | -- | -- |
| <i>P. paulistus</i>               | Unknown     | Pair        | Neotropical | --         | -- | -- |
| <i>P. oustaleti</i>               | Unknown     | Pair        | Neotropical | --         | -- | -- |
| <i>P. difficilis</i>              | Unknown     | Pair        | Neotropical | --         | -- | -- |
| <i>P. ceciliae</i>                | Unknown     | Pair        | Neotropical | --         | -- | -- |
| <i>P. ventralis</i>               | Unknown     | Pair        | Neotropical | --         | -- | -- |
| <i>P. flavovirens</i>             | Unknown     | Pair        | Neotropical | --         | -- | -- |
| <i>P. virescens</i>               | Unknown     | Pair        | Neotropical | --         | -- | -- |
| <i>P. superciliaris</i>           | Unknown     | Pair        | Neotropical | --         | -- | -- |
| <i>P. sylviolus</i>               | Unknown     | Pair        | Neotropical | --         | -- | -- |
| <i>Myiornis albiventris</i>       | Unknown     | Pair        | Neotropical | --         | -- | -- |
| <i>M. auricularis</i>             | Unknown     | Pair        | Neotropical | --         | -- | -- |
| <i>M. atricapillus</i>            | Pair        | Pair        | Neotropical | --         | -- | -- |
| <i>M. ecaudatus</i>               | Pair        | Pair        | Neotropical | --         | -- | -- |
| <i>Lophotriccus pileatus</i>      | Female only | Female only | Neotropical | [369, 378] | -- | -- |
| <i>L. vitiosus</i>                | Unknown     | Female only | Neotropical | [369]      | -- | -- |
| <i>L. eulophotes</i>              | Unknown     | Female only | Neotropical | --         | -- | -- |
| <i>L. galeatus</i>                | Pair        | Pair        | Neotropical | --         | -- | -- |
| <i>Atalotriccus pilaris</i>       | Unknown     | Pair        | Neotropical | --         | -- | -- |
| <i>Oncostoma cinereigulare</i>    | Female only | Female only | Neotropical | [369, 381] | -- | -- |
| <i>O. olivaceum</i>               | Female only | Female only | Neotropical | --         | -- | -- |
| <i>Cnipodectes subbrunneus</i>    | Unknown     | Female only | Neotropical | [369]      | -- | -- |
| <i>Rhynchocyclus brevirostris</i> | Female only | Female only | Neotropical | [369, 381] | -- | -- |
| <i>R. olivaceus</i>               | Unknown     | Female only | Neotropical | [369]      | -- | -- |
| <i>R. fulvipectus</i>             | Unknown     | Female only | Neotropical | --         | -- | -- |
| <i>Tolmomyias sulphurescens</i>   | Pair        | Pair        | Neotropical | [369, 381] | -- | -- |
| <i>T. assimilis</i>               | Unknown     | Pair        | Neotropical | [369]      | -- | -- |
| <i>T. poliocephalus</i>           | Pair        | Pair        | Neotropical | --         | -- | -- |
| <i>T. flaviventris</i>            | Pair        | Pair        | Neotropical | --         | -- | -- |
| <i>Platyrinchus saturatus</i>     | Unknown     | Pair        | Neotropical | --         | -- | -- |

|                                 |             |             |             |                 |    |    |
|---------------------------------|-------------|-------------|-------------|-----------------|----|----|
| <i>P. cancrminus</i>            | Pair        | Pair        | Neotropical | --              | -- | -- |
| <i>P. mystaceus</i>             | Pair        | Pair        | Neotropical | --              | -- | -- |
| <i>P. coronatus</i>             | Pair        | Pair        | Neotropical | [369, 381]      | -- | -- |
| <i>P. flavigularis</i>          | Unknown     | Pair        | Neotropical | [369]           | -- | -- |
| <i>P. platyrhynchos</i>         | Unknown     | Pair        | Neotropical | --              | -- | -- |
| <i>P. leucoryphus</i>           | Pair        | Pair        | Neotropical | --              | -- | -- |
| <i>Onychorhynchus coronatus</i> | Female only | Female only | Neotropical | [369, 381]      | -- | -- |
| <i>Myiotriccus ornatus</i>      | Unknown     | Pair        | Neotropical | [369]           | -- | -- |
| <i>Myiophobus flavicans</i>     | Unknown     | Pair        | Neotropical | --              | -- | -- |
| <i>M. phoenicomitra</i>         | Unknown     | Pair        | Neotropical | --              | -- | -- |
| <i>M. inornatus</i>             | Unknown     | Pair        | Neotropical | --              | -- | -- |
| <i>M. roraimae</i>              | Unknown     | Pair        | Neotropical | --              | -- | -- |
| <i>M. pulcher</i>               | Unknown     | Pair        | Neotropical | --              | -- | -- |
| <i>M. lintoni</i>               | Unknown     | Pair        | Neotropical | --              | -- | -- |
| <i>M. ochraceiventris</i>       | Unknown     | Pair        | Neotropical | --              | -- | -- |
| <i>M. fasciatus</i>             | Pair        | Pair        | Neotropical | [369, 381, 385] | -- | -- |
| <i>M. cryptoxanthus</i>         | Unknown     | Pair        | Neotropical | [369]           | -- | -- |
| <i>Myiobius erythrurus</i>      | Female only | Female only | Neotropical | [381]           | -- | -- |
| <i>M. villosus</i>              | Unknown     | Female only | Neotropical | [369]           | -- | -- |
| <i>M. barbatus</i>              | Female only | Female only | Neotropical | [369, 381, 386] | -- | -- |
| <i>M. atricaudus</i>            | Female only | Female only | Neotropical | [369, 381]      | -- | -- |
| <i>Pyrrhomyias cinnamomea</i>   | Pair        | Pair        | Neotropical | [369]           | -- | -- |
| <i>Hirundinea ferruginea</i>    | Occasional  | Pair        | Neotropical | --              | -- | -- |
| <i>H. bellicosa</i>             | Subspp      | Subspp      | Neotropical | --              | -- | -- |
| <i>Cnemotriccus fuscatus</i>    | Pair        | Pair        | Neotropical | --              | -- | -- |
| <i>Lathrotriccus euleri</i>     | Pair        | Pair        | Neotropical | --              | -- | -- |
| <i>L. griseipectus</i>          | Unknown     | Pair        | Neotropical | --              | -- | -- |
| <i>Aphanotriccus capitalis</i>  | Unknown     | Pair        | Neotropical | --              | -- | -- |
| <i>A. audax</i>                 | Pair        | Pair        | Neotropical | --              | -- | -- |
| <i>Xenotriccus callizonus</i>   | Unknown     | Pair        | Neotropical | --              | -- | -- |
| <i>X. mexicanus</i>             | Unknown     | Pair        | Neotropical | --              | -- | -- |
| <i>Mitrephanes phaeocercus</i>  | Pair        | Pair        | Neotropical | --              | -- | -- |
| <i>M. olivaceus</i>             | Unknown     | Pair        | Neotropical | --              | -- | -- |
| <i>Contopus cooperi</i>         | Pair        | Pair        | Nearctic    | [387]           | -- | -- |
| <i>C. pertinax</i>              | Pair        | Pair        | Neotropical | [388]           | -- | -- |
| <i>C. lugubris</i>              | Pair        | Pair        | Neotropical | [369]           | -- | -- |
| <i>C. fumigatus</i>             | Unknown     | Pair        | Neotropical | --              | -- | -- |
| <i>C. ochraceus</i>             | Unknown     | Pair        | Neotropical | --              | -- | -- |
| <i>C. sordidulus</i>            | Pair        | Pair        | Nearctic    | [389]           | -- | -- |
| <i>C. virens</i>                | Pair        | Pair        | Nearctic    | [390]           | -- | -- |
| <i>C. cinereus</i>              | Pair        | Pair        | Neotropical | [369]           | -- | -- |
| <i>C. nigrescens</i>            | Unknown     | Pair        | Neotropical | --              | -- | -- |
| <i>C. albogularis</i>           | Unknown     | Pair        | Neotropical | --              | -- | -- |

|                                    |         |      |             |            |    |    |
|------------------------------------|---------|------|-------------|------------|----|----|
| <i>C. caribaeus</i>                | Pair    | Pair | Neotropical | --         | -- | -- |
| <i>C. latirostris</i>              | Pair    | Pair | Neotropical | --         | -- | -- |
| <i>Empidonax flaviventris</i>      | Pair    | Pair | Nearctic    | [391]      | -- | -- |
| <i>E. virescens</i>                | Pair    | Pair | Nearctic    | [392]      | -- | -- |
| <i>E. alnorum</i>                  | Pair    | Pair | Nearctic    | [393]      | -- | -- |
| <i>E. traillii</i>                 | Pair    | Pair | Nearctic    | [394]      | -- | -- |
| <i>E. albigularis</i>              | Pair    | Pair | Neotropical | [369]      | -- | -- |
| <i>E. minimus</i>                  | Pair    | Pair | Nearctic    | [395]      | -- | -- |
| <i>E. hammondii</i>                | Pair    | Pair | Nearctic    | [396]      | -- | -- |
| <i>E. wrightii</i>                 | Pair    | Pair | Nearctic    | [397]      | -- | -- |
| <i>E. oberholseri</i>              | Pair    | Pair | Nearctic    | [398]      | -- | -- |
| <i>E. affinis</i>                  | Unknown | Pair | Neotropical | [369]      | -- | -- |
| <i>E. difficilis</i>               | Pair    | Pair | Neotropical | [399]      | -- | -- |
| <i>E. occidentalis</i>             | Pair    | Pair | Neotropical | --         | -- | -- |
| <i>E. flavescens</i>               | Pair    | Pair | Neotropical | [369]      | -- | -- |
| <i>E. fulvifrons</i>               | Pair    | Pair | Neotropical | [400]      | -- | -- |
| <i>E. atriceps</i>                 | Pair    | Pair | Neotropical | [369]      | -- | -- |
| <i>Sayornis phoebe</i>             | Pair    | Pair | Nearctic    | [401]      | -- | -- |
| <i>S. saya</i>                     | Pair    | Pair | Nearctic    | [402]      | -- | -- |
| <i>S. nigricans</i>                | Pair    | Pair | Neotropical | [403]      | -- | -- |
| <i>Pyrocephalus rubinus</i>        | Pair    | Pair | Neotropical | [404, 405] | -- | -- |
| <i>Silvicultrix frontalis</i>      | Unknown | Pair | Neotropical | [369]      | -- | -- |
| <i>S. jelskii</i>                  | Unknown | Pair | Neotropical | --         | -- | -- |
| <i>S. diadema</i>                  | Unknown | Pair | Neotropical | --         | -- | -- |
| <i>S. pulchella</i>                | Unknown | Pair | Neotropical | --         | -- | -- |
| <i>Ochthoeca cinnamomeiventris</i> | Unknown | Pair | Neotropical | --         | -- | -- |
| <i>O. rufipectoralis</i>           | Unknown | Pair | Neotropical | --         | -- | -- |
| <i>O. fumicolor</i>                | Pair    | Pair | Neotropical | --         | -- | -- |
| <i>O. oenanthoides</i>             | Pair    | Pair | Neotropical | --         | -- | -- |
| <i>O. leucophrys</i>               | Unknown | Pair | Neotropical | --         | -- | -- |
| <i>O. piurae</i>                   | Unknown | Pair | Neotropical | --         | -- | -- |
| <i>Tumbezia salvini</i>            | Unknown | Pair | Neotropical | --         | -- | -- |
| <i>Colorhamphus parvirostris</i>   | Pair    | Pair | Neotropical | --         | -- | -- |
| <i>Ochthornis littoralis</i>       | Unknown | Pair | Neotropical | --         | -- | -- |
| <i>Cnemarchus erythropygius</i>    | Unknown | Pair | Neotropical | --         | -- | -- |
| <i>Myiotheretes striaticollis</i>  | Unknown | Pair | Neotropical | --         | -- | -- |
| <i>M. pernix</i>                   | Unknown | Pair | Neotropical | --         | -- | -- |
| <i>M. fumigatus</i>                | Unknown | Pair | Neotropical | --         | -- | -- |
| <i>M. fuscovufus</i>               | Unknown | Pair | Neotropical | --         | -- | -- |
| <i>Xolmis pyrope</i>               | Pair    | Pair | Neotropical | [369, 406] | -- | -- |
| <i>X. cinerea</i>                  | Pair    | Pair | Neotropical | [369]      | -- | -- |
| <i>X. coronata</i>                 | Pair    | Pair | Neotropical | [369, 404] | -- | -- |
| <i>X. velata</i>                   | Unknown | Pair | Neotropical | [369]      | -- | -- |

|                                    |             |             |             |            |    |    |
|------------------------------------|-------------|-------------|-------------|------------|----|----|
| <i>X. irupero</i>                  | Unknown     | Pair        | Neotropical | --         | -- | -- |
| <i>X. rubetra</i>                  | Pair        | Pair        | Neotropical | --         | -- | -- |
| <i>X. salinarum</i>                | Pair        | Pair        | Neotropical | [369, 407] | -- | -- |
| <i>Heteroxolmis dominicana</i>     | Pair        | Pair        | Neotropical | [369, 408] | -- | -- |
| <i>Neoxolmis rufiventris</i>       | Pair        | Pair        | Neotropical | [369]      | -- | -- |
| <i>Agriornis montana</i>           | Pair        | Pair        | Neotropical | --         | -- | -- |
| <i>A. andicola</i>                 | Unknown     | Pair        | Neotropical | --         | -- | -- |
| <i>A. livida</i>                   | Pair        | Pair        | Neotropical | --         | -- | -- |
| <i>A. microptera</i>               | Unknown     | Pair        | Neotropical | --         | -- | -- |
| <i>A. murina</i>                   | Unknown     | Pair        | Neotropical | --         | -- | -- |
| <i>Polioxolmis rufipennis</i>      | Pair        | Pair        | Neotropical | --         | -- | -- |
| <i>Muscisaxicola maculirostris</i> | Pair        | Pair        | Neotropical | --         | -- | -- |
| <i>M. fluviatilis</i>              | Unknown     | Pair        | Neotropical | --         | -- | -- |
| <i>M. macloviana</i>               | Pair        | Pair        | Neotropical | --         | -- | -- |
| <i>M. capistrata</i>               | Unknown     | Pair        | Neotropical | --         | -- | -- |
| <i>M. rufivertex</i>               | Pair        | Pair        | Neotropical | --         | -- | -- |
| <i>M. juninensis</i>               | Unknown     | Pair        | Neotropical | --         | -- | -- |
| <i>M. albilora</i>                 | Unknown     | Pair        | Neotropical | --         | -- | -- |
| <i>M. alpina</i>                   | Unknown     | Pair        | Neotropical | --         | -- | -- |
| <i>M. cinerea</i>                  | Unknown     | Pair        | Neotropical | --         | -- | -- |
| <i>M. albifrons</i>                | Unknown     | Pair        | Neotropical | --         | -- | -- |
| <i>M. flavinucha</i>               | Unknown     | Pair        | Neotropical | --         | -- | -- |
| <i>M. frontalis</i>                | Unknown     | Pair        | Neotropical | --         | -- | -- |
| <i>Muscigralla brevicauda</i>      | Pair        | Pair        | Neotropical | --         | -- | -- |
| <i>Lessonia oreas</i>              | Unknown     | Female only | Neotropical | --         | -- | -- |
| <i>L. rufa</i>                     | Female only | Female only | Neotropical | --         | -- | -- |
| <i>Knipolegus striaticeps</i>      | Unknown     | Pair        | Neotropical | --         | -- | -- |
| <i>K. hudsoni</i>                  | Unknown     | Pair        | Neotropical | --         | -- | -- |
| <i>K. poecilocercus</i>            | Unknown     | Pair        | Neotropical | --         | -- | -- |
| <i>K. signatus</i>                 | Unknown     | Pair        | Neotropical | --         | -- | -- |
| <i>K. cyanirostris</i>             | Pair        | Pair        | Neotropical | --         | -- | -- |
| <i>K. poecilurus</i>               | Unknown     | Pair        | Neotropical | --         | -- | -- |
| <i>K. orenocensis</i>              | Unknown     | Pair        | Neotropical | --         | -- | -- |
| <i>K. aterrimus</i>                | Pair        | Pair        | Neotropical | --         | -- | -- |
| <i>K. nigerrimus</i>               | Unknown     | Pair        | Neotropical | --         | -- | -- |
| <i>K. lophotes</i>                 | Unknown     | Pair        | Neotropical | --         | -- | -- |
| <i>Hymenops perspicillatus</i>     | Pair        | Pair        | Neotropical | --         | -- | -- |
| <i>Fluvicola pica</i>              | Pair        | Pair        | Neotropical | --         | -- | -- |
| <i>F. albiventer</i>               | Pair        | Pair        | Neotropical | --         | -- | -- |
| <i>F. nengeta</i>                  | Unknown     | Pair        | Neotropical | --         | -- | -- |
| <i>Arundinicola leucocephala</i>   | Pair        | Pair        | Neotropical | --         | -- | -- |
| <i>A. tricolor</i>                 | Unknown     | Female only | Neotropical | --         | -- | -- |
| <i>A. risora</i>                   | Unknown     | Female only | Neotropical | --         | -- | -- |



|                                  |         |      |             |                 |    |    |
|----------------------------------|---------|------|-------------|-----------------|----|----|
| <i>Gubernetes yetapa</i>         | Pair    | Pair | Neotropical | --              | -- | -- |
| <i>Satrapa icterophrys</i>       | Pair    | Pair | Neotropical | --              | -- | -- |
| <i>Colonia colonus</i>           | Pair    | Pair | Neotropical | --              | -- | -- |
| <i>Machetornis rixosus</i>       | Unknown | Pair | Neotropical | --              | -- | -- |
| <i>Muscipipra vetula</i>         | Unknown | Pair | Neotropical | [369, 409]      | -- | -- |
| <i>Attila phoenicurus</i>        | Unknown | Pair | Neotropical | [369]           | -- | -- |
| <i>A. cinnamomeus</i>            | Unknown | Pair | Neotropical | --              | -- | -- |
| <i>A. torridus</i>               | Unknown | Pair | Neotropical | --              | -- | -- |
| <i>A. citriniventris</i>         | Unknown | Pair | Neotropical | --              | -- | -- |
| <i>A. bolivianus</i>             | Unknown | Pair | Neotropical | --              | -- | -- |
| <i>A. rufus</i>                  | Unknown | Pair | Neotropical | --              | -- | -- |
| <i>A. spadiceus</i>              | Pair    | Pair | Neotropical | [369, 386]      | -- | -- |
| <i>Casiornis rufa</i>            | Unknown | Pair | Neotropical | [369]           | -- | -- |
| <i>C. fusca</i>                  | Unknown | Pair | Neotropical | --              | -- | -- |
| <i>Rhytipterna holerythra</i>    | Unknown | Pair | Neotropical | --              | -- | -- |
| <i>R. simplex</i>                | Unknown | Pair | Neotropical | --              | -- | -- |
| <i>R. immunda</i>                | Unknown | Pair | Neotropical | --              | -- | -- |
| <i>Sirystes sibilator</i>        | Pair    | Pair | Neotropical | --              | -- | -- |
| <i>Myiarchus semirufus</i>       | Pair    | Pair | Neotropical | --              | -- | -- |
| <i>M. yucatanensis</i>           | Unknown | Pair | Neotropical | --              | -- | -- |
| <i>M. tuberculifer</i>           | Pair    | Pair | Neotropical | [410]           | -- | -- |
| <i>M. barbirostris</i>           | Pair    | Pair | Neotropical | [369]           | -- | -- |
| <i>M. swainsoni</i>              | Pair    | Pair | Neotropical | --              | -- | -- |
| <i>M. venezuelensis</i>          | Unknown | Pair | Neotropical | --              | -- | -- |
| <i>M. panamensis</i>             | Pair    | Pair | Neotropical | --              | -- | -- |
| <i>M. ferox</i>                  | Pair    | Pair | Neotropical | --              | -- | -- |
| <i>M. cephalotes</i>             | Unknown | Pair | Neotropical | --              | -- | -- |
| <i>M. phaeocephalus</i>          | Unknown | Pair | Neotropical | --              | -- | -- |
| <i>M. apicalis</i>               | Pair    | Pair | Neotropical | [369, 411]      | -- | -- |
| <i>M. cinerascens</i>            | Pair    | Pair | Nearctic    | [412, 413]      | -- | -- |
| <i>M. nuttingi</i>               | Pair    | Pair | Neotropical | [369]           | -- | -- |
| <i>M. crinitus</i>               | Pair    | Pair | Nearctic    | [414]           | -- | -- |
| <i>M. tyrannulus</i>             | Pair    | Pair | Neotropical | [369, 404, 415] | -- | -- |
| <i>M. nugator</i>                | Pair    | Pair | Neotropical | [369]           | -- | -- |
| <i>M. magnirostris</i>           | Unknown | Pair | Neotropical | [369, 416]      | -- | -- |
| <i>M. validus</i>                | Pair    | Pair | Neotropical | [369]           | -- | -- |
| <i>M. sagrae</i>                 | Pair    | Pair | Neotropical | --              | -- | -- |
| <i>M. stolidus</i>               | Pair    | Pair | Neotropical | --              | -- | -- |
| <i>M. antillarum</i>             | Pair    | Pair | Neotropical | --              | -- | -- |
| <i>M. oberi</i>                  | Pair    | Pair | Neotropical | --              | -- | -- |
| <i>Deltarhynchus flammulatus</i> | Pair    | Pair | Neotropical | --              | -- | -- |
| <i>Ramphotrigon megacephala</i>  | Unknown | Pair | Neotropical | --              | -- | -- |
| <i>R. fuscicauda</i>             | Unknown | Pair | Neotropical | --              | -- | -- |

|                                                         |             |             |             |                      |         |       |                 |       |
|---------------------------------------------------------|-------------|-------------|-------------|----------------------|---------|-------|-----------------|-------|
| <i>R. ruficauda</i>                                     | Pair        | Pair        | Neotropical | --                   | --      | --    |                 |       |
| <i>Tyrannus niveigularis</i>                            | Pair        | Pair        | Neotropical | [369, 417]           | --      | --    |                 |       |
| <i>T. albogularis</i>                                   | Unknown     | Pair        | Neotropical | [369]                | --      | --    |                 |       |
| <i>T. melancholicus</i>                                 | Pair        | Pair        | Neotropical | [418]                | --      | --    |                 |       |
| <i>T. couchii</i>                                       | Pair        | Pair        | Neotropical | [419]                | --      | --    |                 |       |
| <i>T. vociferans</i>                                    | Pair        | Pair        | Neotropical | [420]                | --      | --    |                 |       |
| <i>T. crassirostris</i>                                 | Pair        | Pair        | Neotropical | [421]                | --      | --    |                 |       |
| <i>T. verticalis</i>                                    | Pair        | Pair        | Nearctic    | [422]                | --      | --    |                 |       |
| <i>T. forficatus</i>                                    | Pair        | Pair        | Nearctic    | [423]                | --      | --    |                 |       |
| <i>T. savana</i>                                        | Pair        | Pair        | Neotropical | [404]                | --      | --    |                 |       |
| <i>T. tyrannus</i>                                      | Unknown     | Pair        | Nearctic    | [424, 425]           | --      | --    |                 |       |
| <i>T. dominicensis</i>                                  | Pair        | Pair        | Neotropical | [426]                | --      | --    |                 |       |
| <i>T. caudifasciatus</i>                                | Pair        | Pair        | Neotropical | [369]                | --      | --    |                 |       |
| <i>T. cubensis</i>                                      | Pair        | Pair        | Neotropical | --                   | --      | --    |                 |       |
| <i>Empidonomus varius</i>                               | Unknown     | Pair        | Neotropical | --                   | --      | --    |                 |       |
| <i>Griseotyrannus aurantioatrocristatus</i>             | Pair        | Pair        | Neotropical | [369, 404]           | --      | --    |                 |       |
| <i>Tyrannopsis sulphurea</i>                            | Pair        | Pair        | Neotropical | [369]                | --      | --    |                 |       |
| <i>Megarynchus pitangua</i>                             | Pair        | Pair        | Neotropical | --                   | --      | --    |                 |       |
| <i>Conopias albobittata</i>                             | Unknown     | Cooperation | Neotropical | --                   | --      | --    |                 |       |
| <i>C. parva</i>                                         | Unknown     | Cooperation | Neotropical | --                   | --      | --    |                 |       |
| <i>C. trivirgata</i>                                    | Unknown     | Cooperation | Neotropical | --                   | --      | --    |                 |       |
| <i>C. cinchoneti</i>                                    | Unknown     | Cooperation | Neotropical | --                   | --      | --    |                 |       |
| <i>Myiodynastes hemichrysus</i>                         | Unknown     | Pair        | Neotropical | --                   | --      | --    |                 |       |
| <i>M. chrysocephalus</i>                                | Pair        | Pair        | Neotropical | --                   | --      | --    |                 |       |
| <i>M. bairdii</i>                                       | Pair        | Pair        | Neotropical | --                   | --      | --    |                 |       |
| <i>M. maculatus</i>                                     | Pair        | Pair        | Neotropical | [369, 381]           | --      | --    |                 |       |
| <i>M. luteiventris</i>                                  | Pair        | Pair        | Neotropical | [369, 427]           | --      | --    |                 |       |
| <i>Myiozetetes cayanensis</i>                           | Cooperation | Cooperation | Neotropical | [369, 381, 428, 429] | --      | --    |                 |       |
| <i>M. similis</i>                                       | Pair        | Pair        | Neotropical | [369, 381, 429]      | --      | --    |                 |       |
| <i>M. granadensis</i>                                   | Pair        | Pair        | Neotropical | [369, 381]           | --      | --    |                 |       |
| <i>M. luteiventris</i>                                  | Unknown     | Pair        | Neotropical | [79]                 | --      | --    |                 |       |
| <i>Legatus leucophaeus</i>                              | Pair        | Pair        | Neotropical | [369]                | --      | --    |                 |       |
| <i>Philohydor lictor</i>                                | Pair        | Pair        | Neotropical | [369, 430]           | --      | --    |                 |       |
| <i>Pitangus sulphuratus</i>                             | Pair        | Pair        | Neotropical | [369, 431]           | --      | --    |                 |       |
| <i>Phelpsia inornata</i>                                | Cooperation | Cooperation | Neotropical | [369, 432]           | --      | --    |                 |       |
| <i>Neopipo cinnamomea</i>                               | Unknown     | Pair        | Neotropical | [369]                | --      | --    | [343, 344, 369] |       |
| <b>Old Australian taxa: Menuridae: Menurinae</b>        |             |             |             |                      |         |       |                 |       |
| <i>Menura alberti</i>                                   | Female only | Female only | Australia   | [332]                | bbdbbba | [433] | a               | [433] |
| <i>M. novaehollandiae</i>                               | Female only | Female only | Australia   | --                   | --      | --    | --              | --    |
| <b>Old Australian taxa: Menuridae: Atrichothorninae</b> |             |             |             |                      |         |       |                 |       |
| <i>Atrichornis rufescens</i>                            | Female only | Female only | Australia   | [332]                | bbdbbba | [433] | b               | [433] |
| <i>A. clamosus</i>                                      | Female only | Female only | Australia   | --                   | --      | --    | --              | --    |
| <b>Old Australian taxa: Climacteridae</b>               |             |             |             |                      |         |       |                 |       |

|                            |             |             |           |       |           |       |
|----------------------------|-------------|-------------|-----------|-------|-----------|-------|
| <i>Cormobates placens</i>  | Unknown     | Pair        | Australia | [434] | bbdbbbbaa | [433] |
| <i>C. leucophaeus</i>      | Pair        | Pair        | Australia | [332] | --        | --    |
| <i>Climacteris affinis</i> | Cooperation | Cooperation | Australia | --    | --        | --    |
| <i>C. erythrops</i>        | Cooperation | Cooperation | Australia | --    | --        | --    |
| <i>C. picumnus</i>         | Cooperation | Cooperation | Australia | --    | --        | --    |
| <i>C. melanura</i>         | Cooperation | Cooperation | Australia | --    | --        | --    |
| <i>C. rufa</i>             | Cooperation | Cooperation | Australia | [434] | --        | --    |

**Old Australian taxa: Ptilonorhynchidae**

|                                  |             |             |           |       |           |       |     |       |
|----------------------------------|-------------|-------------|-----------|-------|-----------|-------|-----|-------|
| <i>Ailuroedus buccoides</i>      | Pair        | Pair        | Australia | [435] | bbdbbbbab | [433] | a   | [436] |
| <i>A. melanotis</i>              | Pair        | Pair        | Australia | --    | --        | --    | --  | --    |
| <i>A. crassirostris</i>          | Pair        | Pair        | Australia | --    | --        | --    | --  | --    |
| <i>Archboldia papuensis</i>      | Female only | Female only | Australia | --    | --        | --    | baa | --    |
| <i>A. sanfordi</i>               | Subspp      | Subspp      | Australia | --    | --        | --    | --  | --    |
| <i>Amblyornis inornatus</i>      | Female only | Female only | Australia | --    | --        | --    | --  | --    |
| <i>A. macgregoriae</i>           | Female only | Female only | Australia | --    | --        | --    | --  | --    |
| <i>A. subalaris</i>              | Female only | Female only | Australia | --    | --        | --    | --  | --    |
| <i>A. flavifrons</i>             | Unknown     | Female only | Australia | --    | --        | --    | --  | --    |
| <i>Prionodura newtoniana</i>     | Female only | Female only | Australia | --    | --        | --    | --  | --    |
| <i>Scenopoeetes dentirostris</i> | Female only | Female only | Australia | --    | --        | --    | bab | --    |
| <i>Ptilonorhynchus violaceus</i> | Female only | Female only | Australia | --    | --        | --    | bba | --    |
| <i>Chlamydera guttata</i>        | Female only | Female only | Australia | --    | --        | --    | --  | --    |
| <i>C. maculata</i>               | Female only | Female only | Australia | --    | --        | --    | --  | --    |
| <i>C. nuchalis</i>               | Female only | Female only | Australia | --    | --        | --    | --  | --    |
| <i>C. lauterbachii</i>           | Female only | Female only | Australia | --    | --        | --    | --  | --    |
| <i>C. cerviniventris</i>         | Female only | Female only | Australia | --    | --        | --    | --  | --    |
| <i>Sericulus aureus</i>          | Female only | Female only | Australia | --    | --        | --    | bbb | --    |
| <i>S. bakeri</i>                 | Female only | Female only | Australia | --    | --        | --    | --  | --    |
| <i>S. chrysocephalus</i>         | Female only | Female only | Australia | --    | --        | --    | --  | --    |

**Old Australian taxa: Maluridae**

|                            |             |             |           |       |           |       |
|----------------------------|-------------|-------------|-----------|-------|-----------|-------|
| <i>Clytomyias insignis</i> | Unknown     | Cooperation | Australia | [437] | bbdbbbbaa | [433] |
| <i>Sipodotus wallacii</i>  | Cooperation | Cooperation | Australia | [434] | --        | --    |
| <i>Malurus grayi</i>       | Cooperation | Cooperation | Australia | [437] | --        | --    |
| <i>M. campbelli</i>        | Cooperation | Cooperation | Australia | --    | --        | --    |
| <i>M. alboscapulatus</i>   | Cooperation | Cooperation | Australia | --    | --        | --    |
| <i>M. melanocephalus</i>   | Cooperation | Cooperation | Australia | [332] | --        | --    |
| <i>M. leucopterus</i>      | Cooperation | Cooperation | Australia | --    | --        | --    |
| <i>M. cyaneus</i>          | Cooperation | Cooperation | Australia | --    | --        | --    |
| <i>M. splendens</i>        | Cooperation | Cooperation | Australia | --    | --        | --    |
| <i>M. lamberti</i>         | Cooperation | Cooperation | Australia | --    | --        | --    |
| <i>M. amabilis</i>         | Cooperation | Cooperation | Australia | --    | --        | --    |
| <i>M. elegans</i>          | Cooperation | Cooperation | Australia | --    | --        | --    |
| <i>M. pulcherrimus</i>     | Cooperation | Cooperation | Australia | --    | --        | --    |
| <i>M. coronatus</i>        | Cooperation | Cooperation | Australia | --    | --        | --    |

|                                          |             |             |           |            |            |       |            |       |
|------------------------------------------|-------------|-------------|-----------|------------|------------|-------|------------|-------|
| <i>M. cyanocephalus</i>                  | Suspected   | Cooperation | Australia | [437]      | --         | --    |            |       |
| <i>Stipiturus ruficeps</i>               | Unknown     | Cooperation | Australia | [332]      | --         | --    |            |       |
| <i>S. malachurus</i>                     | Cooperation | Cooperation | Australia | [438]      | --         | --    |            |       |
| <i>S. mallee</i>                         | Unknown     | Cooperation | Australia | [332]      | --         | --    |            |       |
| <i>Amytornis barbatus</i>                | Suspected   | Cooperation | Australia | --         | --         | --    | [332, 433] |       |
| <i>A. woodwardi</i>                      | Cooperation | Cooperation | Australia | [439]      | --         | --    | [433]      |       |
| <i>A. dorotheae</i>                      | Suspected   | Cooperation | Australia | [437]      | --         | --    |            |       |
| <i>A. striatus</i>                       | Cooperation | Cooperation | Australia | [440]      | --         | --    |            |       |
| <i>A. merrotsoyi</i>                     | Unknown     | Cooperation | Australia | [332]      | --         | --    |            |       |
| <i>A. goyderi</i>                        | Unknown     | Cooperation | Australia | --         | --         | --    |            |       |
| <i>A. textilis</i>                       | Cooperation | Cooperation | Australia | [437]      | --         | --    |            |       |
| <i>A. purnelli</i>                       | Suspected   | Cooperation | Australia | --         | --         | --    |            |       |
| <i>A. housei</i>                         | Cooperation | Cooperation | Australia | [441]      | --         | --    |            |       |
| <i>A. kalkadoon</i>                      | Cooperation | Cooperation | Australia | [332]      | --         | --    |            |       |
| <b>Old Australian taxa: Meliphagidae</b> |             |             |           |            |            |       |            |       |
| <i>Acanthorhynchus tenuirostris</i>      | Pair        | Pair        | Australia | [332]      | bbdbbbbaba | [433] | a          | [442] |
| <i>A. superciliosus</i>                  | Pair        | Pair        | Australia | --         | --         | --    | --         | --    |
| <i>Xanthomyza phrygia</i>                | Pair        | Pair        | Australia | --         | --         | --    | baaaa      | --    |
| <i>Acanthagenys rufogularis</i>          | Unknown     | Pair        | Australia | --         | --         | --    | --         | --    |
| <i>Anthochaera lunulata</i>              | Unknown     | Pair        | Australia | --         | --         | --    | --         | --    |
| <i>A. chrysoptera</i>                    | Suspected   | Cooperation | Australia | --         | --         | --    | --         | --    |
| <i>A. carunculata</i>                    | Occasional  | Pair        | Australia | --         | --         | --    | --         | --    |
| <i>A. paradoxa</i>                       | Pair        | Pair        | Australia | --         | --         | --    | --         | --    |
| <i>Lichenostomus subfrenatus</i>         | Unknown     | Pair        | Australia | [434]      | --         | --    | baaab      | --    |
| <i>L. obscurus</i>                       | Unknown     | Pair        | Australia | --         | --         | --    | --         | --    |
| <i>L. frenatus</i>                       | Unknown     | Pair        | Australia | [332]      | --         | --    | --         | --    |
| <i>L. hindwoodi</i>                      | Unknown     | Pair        | Australia | --         | --         | --    | --         | --    |
| <i>L. chrysops</i>                       | Occasional  | Pair        | Australia | [332, 443] | --         | --    | --         | --    |
| <i>L. versicolor</i>                     | Cooperation | Cooperation | Australia | [332]      | --         | --    | --         | --    |
| <i>L. fasciogularis</i>                  | Unknown     | Cooperation | Australia | --         | --         | --    | --         | --    |
| <i>L. virescens</i>                      | Cooperation | Cooperation | Australia | [332, 444] | --         | --    | --         | --    |
| <i>L. flavus</i>                         | Cooperation | Cooperation | Australia | [332]      | --         | --    | --         | --    |
| <i>L. unicolor</i>                       | Pair        | Pair        | Australia | --         | --         | --    | --         | --    |
| <i>L. leucotis</i>                       | Pair        | Pair        | Australia | --         | --         | --    | --         | --    |
| <i>L. flavicollis</i>                    | Pair        | Pair        | Australia | --         | --         | --    | --         | --    |
| <i>L. melanops</i>                       | Cooperation | Cooperation | Australia | [332, 443] | --         | --    | --         | --    |
| <i>L. cratitius</i>                      | Unknown     | Pair        | Australia | [332]      | --         | --    | --         | --    |
| <i>L. keartlandi</i>                     | Unknown     | Pair        | Australia | --         | --         | --    | --         | --    |
| <i>L. flavescens</i>                     | Pair        | Pair        | Australia | --         | --         | --    | --         | --    |
| <i>L. fuscus</i>                         | Occasional  | Pair        | Australia | --         | --         | --    | --         | --    |
| <i>L. plumulus</i>                       | Pair        | Pair        | Australia | --         | --         | --    | --         | --    |
| <i>L. ornatus</i>                        | Occasional  | Pair        | Australia | --         | --         | --    | --         | --    |
| <i>L. penicillatus</i>                   | Cooperation | Cooperation | Australia | --         | --         | --    | --         | --    |

|                                     |             |             |           |           |    |    |      |    |
|-------------------------------------|-------------|-------------|-----------|-----------|----|----|------|----|
| <i>Melidectes fuscus</i>            | Unknown     | Pair        | Australia | [434]     | -- | -- | --   | -- |
| <i>M. whitemanensis</i>             | Unknown     | Pair        | Australia | --        | -- | -- | --   | -- |
| <i>M. nouhuysi</i>                  | Unknown     | Pair        | Australia | no source | -- | -- | --   | -- |
| <i>M. princeps</i>                  | Unknown     | Pair        | Australia | [445]     | -- | -- | --   | -- |
| <i>M. ochromelas</i>                | Unknown     | Pair        | Australia | [434]     | -- | -- | --   | -- |
| <i>M. leucostephes</i>              | Unknown     | Pair        | Australia | no source | -- | -- | --   | -- |
| <i>M. belfordi</i>                  | Unknown     | Pair        | Australia | [434]     | -- | -- | --   | -- |
| <i>M. rufocrissalis</i>             | Unknown     | Pair        | Australia | --        | -- | -- | --   | -- |
| <i>M. foersteri</i>                 | Unknown     | Pair        | Australia | --        | -- | -- | --   | -- |
| <i>M. torquatus</i>                 | Unknown     | Pair        | Australia | --        | -- | -- | --   | -- |
| <i>M. sclateri</i>                  | Unknown     | Pair        | Australia | no source | -- | -- | --   | -- |
| <i>Manorina melanophrys</i>         | Cooperation | Cooperation | Australia | [332]     | -- | -- | --   | -- |
| <i>M. melanocephala</i>             | Cooperation | Cooperation | Australia | --        | -- | -- | --   | -- |
| <i>M. flavigula</i>                 | Cooperation | Cooperation | Australia | --        | -- | -- | --   | -- |
| <i>Phylidonyris albifrons</i>       | Pair        | Pair        | Australia | --        | -- | -- | --   | -- |
| <i>Meliphaga montana</i>            | Unknown     | Pair        | Australia | [434]     | -- | -- | baab | -- |
| <i>M. mimikae</i>                   | Unknown     | Pair        | Australia | --        | -- | -- | --   | -- |
| <i>M. orientalis</i>                | Unknown     | Pair        | Australia | --        | -- | -- | --   | -- |
| <i>M. albonotata</i>                | Pair        | Pair        | Australia | --        | -- | -- | --   | -- |
| <i>M. aruensis</i>                  | Pair        | Pair        | Australia | --        | -- | -- | --   | -- |
| <i>M. analoga</i>                   | Unknown     | Pair        | Australia | --        | -- | -- | --   | -- |
| <i>M. vicina</i>                    | Unknown     | Pair        | Australia | --        | -- | -- | --   | -- |
| <i>M. gracilis</i>                  | Unknown     | Pair        | Australia | [332]     | -- | -- | --   | -- |
| <i>M. notata</i>                    | Unknown     | Pair        | Australia | --        | -- | -- | --   | -- |
| <i>M. flavirictus</i>               | Unknown     | Pair        | Australia | [434]     | -- | -- | --   | -- |
| <i>M. lewinii</i>                   | Unknown     | Pair        | Australia | [332]     | -- | -- | --   | -- |
| <i>M. albilineata</i>               | Occasional  | Pair        | Australia | --        | -- | -- | --   | -- |
| <i>M. reticulata</i>                | Unknown     | Pair        | Australia | [446]     | -- | -- | --   | -- |
| <i>Pycnopygius ixoides</i>          | Unknown     | Pair        | Australia | [434]     | -- | -- | bab  | -- |
| <i>P. cinereus</i>                  | Unknown     | Pair        | Australia | --        | -- | -- | --   | -- |
| <i>P. stictocephalus</i>            | Unknown     | Pair        | Australia | --        | -- | -- | --   | -- |
| <i>Prothemadera novaeseelandiae</i> | Pair        | Pair        | Australia | [332]     | -- | -- | --   | -- |
| <i>Certhionyx variegatus</i>        | Pair        | Pair        | Australia | --        | -- | -- | --   | -- |
| <i>Ramsayornis modestus</i>         | Unknown     | Pair        | Australia | --        | -- | -- | bba  | -- |
| <i>R. fasciatus</i>                 | Suspected   | Cooperation | Australia | --        | -- | -- | --   | -- |
| <i>Conopophila albogularis</i>      | Pair        | Pair        | Australia | --        | -- | -- | --   | -- |
| <i>C. rufogularis</i>               | Suspected   | Cooperation | Australia | --        | -- | -- | --   | -- |
| <i>C. whitei</i>                    | Unknown     | Pair        | Australia | --        | -- | -- | --   | -- |
| <i>Epthianura tricolor</i>          | Pair        | Pair        | Australia | --        | -- | -- | bbba | -- |
| <i>E. aurifrons</i>                 | Pair        | Pair        | Australia | --        | -- | -- | --   | -- |
| <i>E. crocea</i>                    | Unknown     | Pair        | Australia | --        | -- | -- | --   | -- |
| <i>E. albifrons</i>                 | Pair        | Pair        | Australia | --        | -- | -- | --   | -- |
| <i>Ashbyia lovensis</i>             | Unknown     | Pair        | Australia | --        | -- | -- | --   | -- |

|                                |         |        |           |           |    |    |      |    |
|--------------------------------|---------|--------|-----------|-----------|----|----|------|----|
| <i>Melipotés gymnops</i>       | Unknown | Pair   | Australia | no source | -- | -- | bbbb | -- |
| <i>M. fumigatus</i>            | Unknown | Pair   | Australia | [434]     | -- | -- | --   | -- |
| <i>M. ater</i>                 | Unknown | Pair   | Australia | --        | -- | -- | --   | -- |
| <i>Timeliopsis fulvigula</i>   | Unknown | Pair   | Australia | --        | -- | -- | --   | -- |
| <i>T. griseigula</i>           | Unknown | Pair   | Australia | --        | -- | -- | --   | -- |
| <i>Melilestes megarhynchus</i> | Pair    | Pair   | Australia | --        | -- | -- | --   | -- |
| <i>Myzomela blasii</i>         | Unknown | Pair   | Australia | [446]     | -- | -- | bca  | -- |
| <i>M. albigula</i>             | Unknown | Pair   | Australia | [434]     | -- | -- | --   | -- |
| <i>M. eques</i>                | Unknown | Pair   | Australia | --        | -- | -- | --   | -- |
| <i>M. obscura</i>              | Unknown | Pair   | Australia | [332]     | -- | -- | --   | -- |
| <i>M. cruentata</i>            | Unknown | Pair   | Australia | [446]     | -- | -- | --   | -- |
| <i>M. nigrita</i>              | Unknown | Pair   | Australia | --        | -- | -- | --   | -- |
| <i>M. pulchella</i>            | Unknown | Pair   | Australia | no source | -- | -- | --   | -- |
| <i>M. adolphinae</i>           | Unknown | Pair   | Australia | [434]     | -- | -- | --   | -- |
| <i>M. kuehni</i>               | Unknown | Pair   | Australia | [445]     | -- | -- | --   | -- |
| <i>M. dammermani</i>           | Unknown | Pair   | Australia | [446]     | -- | -- | --   | -- |
| <i>M. erythrocephala</i>       | Unknown | Pair   | Australia | [332]     | -- | -- | --   | -- |
| <i>M. chloroptera</i>          | Subspp  | Subspp | Australia | [446]     | -- | -- | --   | -- |
| <i>M. wakoloensis</i>          | Subspp  | Subspp | Australia | --        | -- | -- | --   | -- |
| <i>M. boiei</i>                | Subspp  | Subspp | Australia | --        | -- | -- | --   | -- |
| <i>M. sanguinolenta</i>        | Pair    | Pair   | Australia | [332]     | -- | -- | --   | -- |
| <i>M. caledonica</i>           | Pair    | Pair   | Australia | [447]     | -- | -- | --   | -- |
| <i>M. rubratra</i>             | Unknown | Pair   | Australia | [448]     | -- | -- | --   | -- |
| <i>M. cardinalis</i>           | Pair    | Pair   | Australia | [449]     | -- | -- | --   | -- |
| <i>M. chermesina</i>           | Unknown | Pair   | Australia | [450]     | -- | -- | --   | -- |
| <i>M. sclateri</i>             | Pair    | Pair   | Australia | [434]     | -- | -- | --   | -- |
| <i>M. pammelaena</i>           | Unknown | Pair   | Australia | [451]     | -- | -- | --   | -- |
| <i>M. lafargei</i>             | Unknown | Pair   | Australia | [434]     | -- | -- | --   | -- |
| <i>M. eichhorni</i>            | Unknown | Pair   | Australia | no source | -- | -- | --   | -- |
| <i>M. melanocephala</i>        | Unknown | Pair   | Australia | --        | -- | -- | --   | -- |
| <i>M. malaitae</i>             | Unknown | Pair   | Australia | [445]     | -- | -- | --   | -- |
| <i>M. tristrami</i>            | Unknown | Pair   | Australia | [452]     | -- | -- | --   | -- |
| <i>M. jugularis</i>            | Unknown | Pair   | Australia | [450]     | -- | -- | --   | -- |
| <i>M. erythromelas</i>         | Unknown | Pair   | Australia | no source | -- | -- | --   | -- |
| <i>M. vulnerata</i>            | Unknown | Pair   | Australia | [446]     | -- | -- | --   | -- |
| <i>M. rosenbergii</i>          | Unknown | Pair   | Australia | [434]     | -- | -- | --   | -- |
| <i>Certhionyx niger</i>        | Pair    | Pair   | Australia | [332]     | -- | -- | --   | -- |
| <i>Glycichaera fallax</i>      | Unknown | Pair   | Australia | --        | -- | -- | bcb  | -- |
| <i>Ptiloprora plumbea</i>      | Unknown | Pair   | Australia | [434]     | -- | -- | --   | -- |
| <i>P. meekiana</i>             | Unknown | Pair   | Australia | --        | -- | -- | --   | -- |
| <i>P. erythropleura</i>        | Unknown | Pair   | Australia | no source | -- | -- | --   | -- |
| <i>P. mayri</i>                | Unknown | Pair   | Australia | [434]     | -- | -- | --   | -- |
| <i>P. guisei</i>               | Unknown | Pair   | Australia | --        | -- | -- | --   | -- |

|                                 |             |             |           |            |    |    |      |    |
|---------------------------------|-------------|-------------|-----------|------------|----|----|------|----|
| <i>P. perstriata</i>            | Unknown     | Pair        | Australia | --         | -- | -- | --   | -- |
| <i>Phylidonyris melanops</i>    | Pair        | Pair        | Australia | [332]      | -- | -- | --   | -- |
| <i>Lichmera lombokia</i>        | Unknown     | Pair        | Australia | [446]      | -- | -- | bda  | -- |
| <i>L. argentauris</i>           | Unknown     | Pair        | Australia | --         | -- | -- | --   | -- |
| <i>L. limbata</i>               | Unknown     | Pair        | Australia | no source  | -- | -- | --   | -- |
| <i>L. indistincta</i>           | Pair        | Pair        | Australia | [332]      | -- | -- | --   | -- |
| <i>L. incana</i>                | Pair        | Pair        | Australia | [447]      | -- | -- | --   | -- |
| <i>L. squamata</i>              | Unknown     | Pair        | Australia | [446]      | -- | -- | --   | -- |
| <i>L. alboauricularis</i>       | Unknown     | Pair        | Australia | [434]      | -- | -- | --   | -- |
| <i>L. deningeri</i>             | Unknown     | Pair        | Australia | [446]      | -- | -- | --   | -- |
| <i>L. monticola</i>             | Unknown     | Pair        | Australia | --         | -- | -- | --   | -- |
| <i>L. flavicans</i>             | Unknown     | Pair        | Australia | --         | -- | -- | --   | -- |
| <i>L. notabilis</i>             | Unknown     | Pair        | Australia | [445]      | -- | -- | --   | -- |
| <i>Trichodere cockerelli</i>    | Unknown     | Pair        | Australia | [332]      | -- | -- | --   | -- |
| <i>Phylidonyris pyrrhoptera</i> | Pair        | Pair        | Australia | --         | -- | -- | --   | -- |
| <i>P. novaehollandiae</i>       | Occasional  | Pair        | Australia | --         | -- | -- | --   | -- |
| <i>P. nigra</i>                 | Pair        | Pair        | Australia | --         | -- | -- | --   | -- |
| <i>Certhionyx pectoralis</i>    | Unknown     | Pair        | Australia | --         | -- | -- | --   | -- |
| <i>Foulehaio carunculata</i>    | Pair        | Pair        | Australia | [450]      | -- | -- | bdb  | -- |
| <i>Melithreptus lunatus</i>     | Cooperation | Cooperation | Australia | [332]      | -- | -- | --   | -- |
| <i>M. affinis</i>               | Cooperation | Cooperation | Australia | --         | -- | -- | --   | -- |
| <i>M. albogularis</i>           | Cooperation | Cooperation | Australia | --         | -- | -- | --   | -- |
| <i>M. laetior</i>               | Cooperation | Cooperation | Australia | --         | -- | -- | --   | -- |
| <i>M. gularis</i>               | Cooperation | Cooperation | Australia | --         | -- | -- | --   | -- |
| <i>M. validirostris</i>         | Cooperation | Cooperation | Australia | --         | -- | -- | --   | -- |
| <i>M. brevirostris</i>          | Cooperation | Cooperation | Australia | [332, 453] | -- | -- | --   | -- |
| <i>Entomyzon cyanotis</i>       | Cooperation | Cooperation | Australia | [332]      | -- | -- | --   | -- |
| <i>Xanthotis flaviventer</i>    | Unknown     | Pair        | Australia | --         | -- | -- | bdc  | -- |
| <i>X. polygramma</i>            | Unknown     | Pair        | Australia | [434]      | -- | -- | --   | -- |
| <i>X. macleayana</i>            | Unknown     | Pair        | Australia | [332]      | -- | -- | --   | -- |
| <i>X. provocator</i>            | Unknown     | Pair        | Australia | [450]      | -- | -- | bdca | -- |
| <i>Plectorhyncha lanceolata</i> | Cooperation | Cooperation | Australia | [332, 454] | -- | -- | --   | -- |
| <i>Grantiella picta</i>         | Pair        | Pair        | Australia | [332]      | -- | -- | --   | -- |
| <i>Philemon meyeri</i>          | Unknown     | Pair        | Australia | [434]      | -- | -- | bdcb | -- |
| <i>P. inornatus</i>             | Unknown     | Pair        | Australia | [446]      | -- | -- | --   | -- |
| <i>P. kisserensis</i>           | Unknown     | Pair        | Australia | --         | -- | -- | --   | -- |
| <i>P. brassi</i>                | Unknown     | Pair        | Australia | [445]      | -- | -- | --   | -- |
| <i>P. citreogularis</i>         | Pair        | Pair        | Australia | [332]      | -- | -- | --   | -- |
| <i>P. fuscicapillus</i>         | Unknown     | Pair        | Australia | [455]      | -- | -- | --   | -- |
| <i>P. moluccensis</i>           | Unknown     | Pair        | Australia | [446]      | -- | -- | --   | -- |
| <i>P. subcorniculatus</i>       | Unknown     | Pair        | Australia | --         | -- | -- | --   | -- |
| <i>P. buceroides</i>            | Unknown     | Pair        | Australia | [332]      | -- | -- | --   | -- |
| <i>P. novaeguineae</i>          | Unknown     | Pair        | Australia | no source  | -- | -- | --   | -- |

|                                                          |             |             |           |            |            |       |          |       |
|----------------------------------------------------------|-------------|-------------|-----------|------------|------------|-------|----------|-------|
| <i>P. albitorques</i>                                    | Unknown     | Pair        | Australia | [434]      | --         | --    | --       | --    |
| <i>P. cockerelli</i>                                     | Pair        | Pair        | Australia | --         | --         | --    | --       | --    |
| <i>P. eichhorni</i>                                      | Unknown     | Pair        | Australia | --         | --         | --    | --       | --    |
| <i>P. argenteiceps</i>                                   | Pair        | Pair        | Australia | [332]      | --         | --    | --       | --    |
| <i>P. corniculatus</i>                                   | Pair        | Pair        | Australia | --         | --         | --    | --       | --    |
| <i>P. diemenensis</i>                                    | Unknown     | Pair        | Australia | [447]      | --         | --    | --       | --    |
| <i>Stresemannia bougainvillei</i>                        | Unknown     | Pair        | Australia | [125, 434] | --         | --    | Untested | --    |
| <i>Guadalcanaria inexpectata</i>                         | Pair        | Pair        | Australia | [447]      | --         | --    | --       | --    |
| <i>Oreornis chrysogenys</i>                              | Unknown     | Pair        | Australia | no source  | --         | --    | --       | --    |
| <i>Notiomystis cincta</i>                                | Cooperation | Cooperation | Australia | [332, 456] | --         | --    | --       | --    |
| <i>Melitograis gilolensis</i>                            | Unknown     | Pair        | Australia | [446]      | --         | --    | --       | --    |
| <i>Myza celebensis</i>                                   | Unknown     | Pair        | Australia | --         | --         | --    | --       | --    |
| <i>M. sarasinorum</i>                                    | Unknown     | Pair        | Australia | --         | --         | --    | --       | --    |
| <i>Gymnomyza viridis</i>                                 | Unknown     | Pair        | Australia | [445]      | --         | --    | --       | --    |
| <i>G. samoensis</i>                                      | Unknown     | Pair        | Australia | [450]      | --         | --    | --       | --    |
| <i>G. aubryana</i>                                       | Pair        | Pair        | Australia | [445]      | --         | --    | --       | --    |
| <i>Phylidonyris undulata</i>                             | Unknown     | Pair        | Australia | no source  | --         | --    | --       | --    |
| <i>P. notabilis</i>                                      | Unknown     | Pair        | Australia | [449]      | --         | --    | --       | --    |
| <i>Anthornis melanura</i>                                | Pair        | Pair        | Australia | [332]      | --         | --    | --       | --    |
| <i>Macgregoria pulchra</i>                               | Pair        | Pair        | Australia | [457]      | --         | --    | --       | [458] |
| <b>Old Australian taxa: Pardalotidae: Pardalotinae</b>   |             |             |           |            |            |       |          |       |
| <i>Pardalotus punctatus</i>                              | Pair        | Pair        | Australia | [459]      | bbdbbbbabb | [433] | a        | [3]   |
| <i>P. quadragintus</i>                                   | Pair        | Pair        | Australia | --         | --         | --    | --       | --    |
| <i>P. rubricatus</i>                                     | Pair        | Pair        | Australia | --         | --         | --    | --       | --    |
| <i>P. striatus</i>                                       | Cooperation | Cooperation | Australia | --         | --         | --    | --       | --    |
| <b>Old Australian taxa: Pardalotidae: Dasyornithinae</b> |             |             |           |            |            |       |          |       |
| <i>Dasyornis longirostris</i>                            | Pair        | Pair        | Australia | [459]      | bbdbbbbabb | [433] | b        | [3]   |
| <i>D. brachypterus</i>                                   | Pair        | Pair        | Australia | --         | --         | --    | --       | --    |
| <i>D. broadbenti</i>                                     | Pair        | Pair        | Australia | --         | --         | --    | --       | --    |
| <b>Old Australian taxa: Pardalotidae: Acanthizinae</b>   |             |             |           |            |            |       |          |       |
| <i>Pycnoptilus floccosus</i>                             | Pair        | Pair        | Australia | [459]      | bbdbbbbabb | [433] | c        | [3]   |
| <i>Origma solitaria</i>                                  | Pair        | Pair        | Australia | --         | --         | --    | --       | --    |
| <i>Oreoscopus gutturalis</i>                             | Pair        | Pair        | Australia | --         | --         | --    | --       | --    |
| <i>Crateroscelis murina</i>                              | Unknown     | Pair        | Australia | [434]      | --         | --    | --       | --    |
| <i>C. nigrorufa</i>                                      | Unknown     | Cooperation | Australia | --         | --         | --    | --       | --    |
| <i>C. robusta</i>                                        | Unknown     | Pair        | Australia | --         | --         | --    | --       | --    |
| <i>Sericornis citreogularis</i>                          | Pair        | Pair        | Australia | [459]      | --         | --    | --       | --    |
| <i>S. frontalis</i>                                      | Cooperation | Cooperation | Australia | [460, 461] | --         | --    | --       | --    |
| <i>S. humilis</i>                                        | Suspected   | Cooperation | Australia | [459]      | --         | --    | --       | --    |
| <i>S. keri</i>                                           | Unknown     | Cooperation | Australia | --         | --         | --    | --       | --    |
| <i>S. beccarii</i>                                       | Suspected   | Cooperation | Australia | [462]      | --         | --    | --       | --    |
| <i>S. virgatus</i>                                       | Unknown     | Cooperation | Australia | no source  | --         | --    | --       | --    |
| <i>S. nouhuysi</i>                                       | Suspected   | Cooperation | Australia | [462]      | --         | --    | --       | --    |



|                                |             |             |             |            |    |    |    |    |
|--------------------------------|-------------|-------------|-------------|------------|----|----|----|----|
| <i>S. magnirostris</i>         | Cooperation | Cooperation | Australia   | [459]      | -- | -- | -- | -- |
| <i>S. rufescens</i>            | Unknown     | Cooperation | Australia   | no source  | -- | -- | -- | -- |
| <i>S. perspicillatus</i>       | Suspected   | Cooperation | Australia   | [462]      | -- | -- | -- | -- |
| <i>S. arfakianus</i>           | Unknown     | Cooperation | Australia   | [434]      | -- | -- | -- | -- |
| <i>S. papuensis</i>            | Suspected   | Cooperation | Australia   | [462]      | -- | -- | -- | -- |
| <i>S. spilodera</i>            | Unknown     | Cooperation | Australia   | [434]      | -- | -- | -- | -- |
| <i>Acanthornis magnus</i>      | Pair        | Pair        | Australia   | [459]      | -- | -- | -- | -- |
| <i>Pyrrholaemus brunneus</i>   | Pair        | Pair        | Australia   | --         | -- | -- | -- | -- |
| <i>Chthonicola sagittatus</i>  | Group       | Pair        | Australia   | [463, 464] | -- | -- | -- | -- |
| <i>Calamanthus campestris</i>  | Pair        | Pair        | Australia   | [459]      | -- | -- | -- | -- |
| <i>C. fuliginosus</i>          | Pair        | Pair        | Australia   | --         | -- | -- | -- | -- |
| <i>Hylacola pyrrhopygia</i>    | Pair        | Pair        | Australia   | --         | -- | -- | -- | -- |
| <i>H. cautus</i>               | Pair        | Pair        | Australia   | --         | -- | -- | -- | -- |
| <i>Acanthiza murina</i>        | Cooperation | Cooperation | Australia   | [434]      | -- | -- | -- | -- |
| <i>A. katherina</i>            | Cooperation | Cooperation | Australia   | [459, 465] | -- | -- | -- | -- |
| <i>A. pusilla</i>              | Pair        | Pair        | Australia   | [466]      | -- | -- | -- | -- |
| <i>A. ewingii</i>              | Pair        | Pair        | Australia   | [462]      | -- | -- | -- | -- |
| <i>A. reguloides</i>           | Cooperation | Cooperation | Australia   | [459]      | -- | -- | -- | -- |
| <i>A. inornata</i>             | Cooperation | Cooperation | Australia   | --         | -- | -- | -- | -- |
| <i>A. iredalei</i>             | Cooperation | Cooperation | Australia   | --         | -- | -- | -- | -- |
| <i>A. chrysorrhoa</i>          | Cooperation | Cooperation | Australia   | --         | -- | -- | -- | -- |
| <i>A. uropygialis</i>          | Cooperation | Cooperation | Australia   | --         | -- | -- | -- | -- |
| <i>A. nana</i>                 | Cooperation | Cooperation | Australia   | --         | -- | -- | -- | -- |
| <i>A. lineata</i>              | Cooperation | Cooperation | Australia   | --         | -- | -- | -- | -- |
| <i>A. robustirostris</i>       | Pair        | Pair        | Australia   | [462]      | -- | -- | -- | -- |
| <i>Smicrornis brevirostris</i> | Cooperation | Cooperation | Australia   | [459]      | -- | -- | -- | -- |
| <i>Gerygone cinerea</i>        | Unknown     | Pair        | Australia   | [434]      | -- | -- | -- | -- |
| <i>G. chloronotus</i>          | Unknown     | Pair        | Australia   | [459]      | -- | -- | -- | -- |
| <i>G. palpebrosa</i>           | Unknown     | Pair        | Australia   | --         | -- | -- | -- | -- |
| <i>G. olivacea</i>             | Pair        | Pair        | Australia   | --         | -- | -- | -- | -- |
| <i>G. chrysogaster</i>         | Suspected   | Cooperation | Australia   | [434]      | -- | -- | -- | -- |
| <i>G. magnirostris</i>         | Pair        | Pair        | Australia   | [459]      | -- | -- | -- | -- |
| <i>G. tenebrosa</i>            | Unknown     | Pair        | Australia   | --         | -- | -- | -- | -- |
| <i>G. sulphurea</i>            | Unknown     | Pair        | Indomalayan | [467, 468] | -- | -- | -- | -- |
| <i>G. inornata</i>             | Unknown     | Pair        | Australia   | [446]      | -- | -- | -- | -- |
| <i>G. dorsalis</i>             | Pair        | Pair        | Australia   | --         | -- | -- | -- | -- |
| <i>G. ruficollis</i>           | Unknown     | Pair        | Australia   | [434]      | -- | -- | -- | -- |
| <i>G. levigaster</i>           | Pair        | Pair        | Australia   | [469]      | -- | -- | -- | -- |
| <i>G. fusca</i>                | Pair        | Pair        | Australia   | [459]      | -- | -- | -- | -- |
| <i>G. mouki</i>                | Cooperation | Cooperation | Australia   | [459, 470] | -- | -- | -- | -- |
| <i>G. modesta</i>              | Unknown     | Pair        | Australia   | [459]      | -- | -- | -- | -- |
| <i>G. igata</i>                | Pair        | Pair        | Australia   | --         | -- | -- | -- | -- |
| <i>G. albofrontata</i>         | Pair        | Pair        | Australia   | --         | -- | -- | -- | -- |

|                                              |             |             |             |            |              |            |      |            |
|----------------------------------------------|-------------|-------------|-------------|------------|--------------|------------|------|------------|
| <i>G. flavolateralis</i>                     | Pair        | Pair        | Australia   | [471]      | --           | --         | --   | --         |
| <i>Aphelocephala leucopsis</i>               | Cooperation | Cooperation | Australia   | [459]      | --           | --         | --   | --         |
| <i>A. pectoralis</i>                         | Cooperation | Cooperation | Australia   | --         | --           | --         | --   | --         |
| <i>A. nigricincta</i>                        | Suspected   | Cooperation | Australia   | --         | --           | --         | --   | --         |
| <b>Old Australian taxa: Pomatostomidae</b>   |             |             |             |            |              |            |      |            |
| <i>Pomatostomus isidorei</i>                 | Cooperation | Cooperation | Australia   | [434]      | bbdbbbbba    | [433]      |      |            |
| <i>P. temporalis</i>                         | Cooperation | Cooperation | Australia   | [459]      | --           | --         |      |            |
| <i>P. superciliosus</i>                      | Cooperation | Cooperation | Australia   | --         | --           | --         |      |            |
| <i>P. halli</i>                              | Cooperation | Cooperation | Australia   | --         | --           | --         |      |            |
| <i>P. ruficeps</i>                           | Cooperation | Cooperation | Australia   | --         | --           | --         |      |            |
| <b>Old Australian taxa: Orthonychidae</b>    |             |             |             |            |              |            |      |            |
| <i>Orthonyx temminckii</i>                   | Female only | Female only | Australia   | [472]      | bbdbbbbba    | [433]      |      |            |
| <i>O. spaldingii</i>                         | Group       | Female only | Australia   | [473, 474] | --           | --         |      |            |
| <b>Old Australian taxa: Melanocharitidae</b> |             |             |             |            |              |            |      |            |
| <i>Melanocharis arfakiana</i>                | Unknown     | Pair        | Australia   | [434]      | bbdbbbbbaaa  | [433]      |      |            |
| <i>M. nigra</i>                              | Pair        | Pair        | Australia   | --         | --           | --         |      |            |
| <i>M. longicauda</i>                         | Unknown     | Pair        | Australia   | --         | --           | --         |      |            |
| <i>M. versteri</i>                           | Unknown     | Pair        | Australia   | --         | --           | --         |      |            |
| <i>M. striativentris</i>                     | Unknown     | Pair        | Australia   | --         | --           | --         |      |            |
| <i>M. crassirostris</i>                      | Unknown     | Pair        | Australia   | --         | --           | --         |      |            |
| <i>Toxorhamphus poliopterus</i>              | Unknown     | Pair        | Australia   | --         | --           | --         |      |            |
| <i>T. novaeguineae</i>                       | Unknown     | Pair        | Australia   | --         | --           | --         |      |            |
| <i>T. iliolophus</i>                         | Unknown     | Pair        | Australia   | --         | --           | --         |      |            |
| <i>Oedistoma pygmaeum</i>                    | Unknown     | Pair        | Australia   | --         | --           | --         |      |            |
| <b>Old Australian taxa: Callaeatidae</b>     |             |             |             |            |              |            |      |            |
| <i>Callaeas cinerea</i>                      | Pair        | Pair        | Australia   | [475]      | bbdbbbbbaaba | [433]      |      |            |
| <i>Philesturnus carunculatus</i>             | Pair        | Pair        | Australia   | --         | --           | --         |      |            |
| <b>Old Australian taxa: Cnemophilidae</b>    |             |             |             |            |              |            |      |            |
| <i>Loboparadisea sericea</i>                 | Unknown     | Female only | Australia   | [457]      | bbdbbbbbaabb | [433, 458] |      |            |
| <i>Cnemophilus macgregorii</i>               | Female only | Female only | Australia   | --         | --           | --         |      |            |
| <i>C. lorae</i>                              | Female only | Female only | Australia   | --         | --           | --         |      |            |
| <b>Corvoidea: Neosittidae</b>                |             |             |             |            |              |            |      |            |
| <i>Daphoenositta chrysoptera</i>             | Cooperation | Cooperation | Australia   | [459]      | bbdbbbbba    | [433]      |      |            |
| <i>D. miranda</i>                            | Cooperation | Cooperation | Australia   | [434]      | --           | --         |      |            |
| <b>Corvoidea: Vireonidae</b>                 |             |             |             |            |              |            |      |            |
| <i>Erpornis zantholeuca</i>                  | Suspected   | Cooperation | Indomalayan | [476]      | bbdbbbbba    | [433]      | a    | [433, 477] |
| <i>Vireolanius melitophrys</i>               | Unknown     | Pair        | Neotropical | [478]      | --           | --         | ba   | [479]      |
| <i>V. pulchellus</i>                         | Unknown     | Pair        | Neotropical | [480]      | --           | --         | --   | --         |
| <i>V. eximius</i>                            | Unknown     | Pair        | Neotropical | [79, 370]  | --           | --         | --   | --         |
| <i>V. leucotis</i>                           | Unknown     | Pair        | Neotropical | [481]      | --           | --         | --   | --         |
| <i>Cyclarhis gujanensis</i>                  | Pair        | Pair        | Neotropical | [480]      | --           | --         | bba  | --         |
| <i>C. nigrirostris</i>                       | Unknown     | Pair        | Neotropical | [370]      | --           | --         | --   | --         |
| <i>Hylophilus amaurocephalus</i>             | Unknown     | Pair        | Neotropical | [481]      | --           | --         | bbba | --         |

|                          |         |      |             |            |    |    |      |    |
|--------------------------|---------|------|-------------|------------|----|----|------|----|
| <i>H. poicilotis</i>     | Pair    | Pair | Neotropical | --         | -- | -- | --   | -- |
| <i>H. thoracicus</i>     | Unknown | Pair | Neotropical | [79]       | -- | -- | --   | -- |
| <i>H. semicinereus</i>   | Unknown | Pair | Neotropical | --         | -- | -- | --   | -- |
| <i>H. pectoralis</i>     | Unknown | Pair | Neotropical | --         | -- | -- | --   | -- |
| <i>H. sclateri</i>       | Unknown | Pair | Neotropical | --         | -- | -- | --   | -- |
| <i>H. muscicapinus</i>   | Unknown | Pair | Neotropical | --         | -- | -- | --   | -- |
| <i>H. brunneiceps</i>    | Unknown | Pair | Neotropical | --         | -- | -- | --   | -- |
| <i>H. hypoxanthus</i>    | Unknown | Pair | Neotropical | --         | -- | -- | --   | -- |
| <i>H. semibrunneus</i>   | Unknown | Pair | Neotropical | --         | -- | -- | --   | -- |
| <i>H. aurantiifrons</i>  | Pair    | Pair | Neotropical | [79, 482]  | -- | -- | --   | -- |
| <i>H. flavipes</i>       | Pair    | Pair | Neotropical | [480]      | -- | -- | --   | -- |
| <i>H. olivaceus</i>      | Unknown | Pair | Neotropical | [481]      | -- | -- | --   | -- |
| <i>H. ochraceiceps</i>   | Pair    | Pair | Neotropical | [381]      | -- | -- | --   | -- |
| <i>H. decurtatus</i>     | Pair    | Pair | Neotropical | --         | -- | -- | --   | -- |
| <i>Vireo brevipennis</i> | Unknown | Pair | Neotropical | [478, 483] | -- | -- | bbbb | -- |
| <i>V. bellii</i>         | Pair    | Pair | Nearctic    | [484]      | -- | -- | --   | -- |
| <i>V. atricapillus</i>   | Pair    | Pair | Nearctic    | [485]      | -- | -- | --   | -- |
| <i>V. nelsoni</i>        | Pair    | Pair | Neotropical | [478]      | -- | -- | --   | -- |
| <i>V. huttoni</i>        | Pair    | Pair | Nearctic    | [486]      | -- | -- | --   | -- |
| <i>V. carmioli</i>       | Unknown | Pair | Neotropical | [481]      | -- | -- | --   | -- |
| <i>V. griseus</i>        | Pair    | Pair | Nearctic    | [487]      | -- | -- | --   | -- |
| <i>V. pallens</i>        | Unknown | Pair | Neotropical | [480]      | -- | -- | --   | -- |
| <i>V. bairdi</i>         | Unknown | Pair | Neotropical | [478]      | -- | -- | --   | -- |
| <i>V. gundlachi</i>      | Pair    | Pair | Neotropical | [488]      | -- | -- | --   | -- |
| <i>V. crassirostris</i>  | Unknown | Pair | Neotropical | --         | -- | -- | --   | -- |
| <i>V. caribaeus</i>      | Pair    | Pair | Neotropical | [489]      | -- | -- | --   | -- |
| <i>V. vicinior</i>       | Pair    | Pair | Nearctic    | [490]      | -- | -- | --   | -- |
| <i>V. hypochryseus</i>   | Unknown | Pair | Neotropical | [478]      | -- | -- | --   | -- |
| <i>V. modestus</i>       | Unknown | Pair | Neotropical | [491]      | -- | -- | --   | -- |
| <i>V. nanus</i>          | Unknown | Pair | Neotropical | --         | -- | -- | --   | -- |
| <i>V. latimeri</i>       | Pair    | Pair | Neotropical | [492]      | -- | -- | --   | -- |
| <i>V. osburni</i>        | Unknown | Pair | Neotropical | [445]      | -- | -- | --   | -- |
| <i>V. cassinii</i>       | Pair    | Pair | Nearctic    | [493]      | -- | -- | --   | -- |
| <i>V. plumbeus</i>       | Pair    | Pair | Nearctic    | [494]      | -- | -- | --   | -- |
| <i>V. solitarius</i>     | Pair    | Pair | Nearctic    | [495]      | -- | -- | --   | -- |
| <i>V. flavifrons</i>     | Pair    | Pair | Nearctic    | [496]      | -- | -- | --   | -- |
| <i>V. philadelphicus</i> | Pair    | Pair | Nearctic    | [497]      | -- | -- | --   | -- |
| <i>V. olivaceus</i>      | Pair    | Pair | Nearctic    | [498]      | -- | -- | --   | -- |
| <i>V. flavoviridis</i>   | Pair    | Pair | Neotropical | [381]      | -- | -- | --   | -- |
| <i>V. gracilirostris</i> | Unknown | Pair | Neotropical | [499]      | -- | -- | --   | -- |
| <i>V. altiloquus</i>     | Unknown | Pair | Neotropical | [500]      | -- | -- | --   | -- |
| <i>V. magister</i>       | Pair    | Pair | Neotropical | [478]      | -- | -- | --   | -- |
| <i>V. swainsonii</i>     | Pair    | Pair | Nearctic    | [493]      | -- | -- | --   | -- |

|                                 |             |             |             |            |                |       |    |       |
|---------------------------------|-------------|-------------|-------------|------------|----------------|-------|----|-------|
| <i>V. gilvus</i>                | Pair        | Pair        | Nearctic    | [501]      | --             | --    | -- | --    |
| <i>V. leucophrys</i>            | Unknown     | Pair        | Neotropical | [480]      | --             | --    | -- | --    |
| <b>Corvoidea: Campephagidae</b> |             |             |             |            |                |       |    |       |
| <i>Pteropodocys maxima</i>      | Cooperation | Cooperation | Australia   | [502]      | bbdbbbbbbabbba | [433] |    | [502] |
| <i>Coracina larvata</i>         | Unknown     | Pair        | Indomalayan | --         | --             | --    |    |       |
| <i>C. macei</i>                 | Unknown     | Pair        | Indomalayan | --         | --             | --    |    |       |
| <i>C. javensis</i>              | Unknown     | Pair        | Indomalayan | --         | --             | --    |    |       |
| <i>C. schistacea</i>            | Unknown     | Pair        | Australia   | --         | --             | --    |    |       |
| <i>C. personata</i>             | Unknown     | Pair        | Australia   | --         | --             | --    |    |       |
| <i>C. atriceps</i>              | Unknown     | Pair        | Australia   | --         | --             | --    |    |       |
| <i>C. fortis</i>                | Unknown     | Pair        | Australia   | --         | --             | --    |    |       |
| <i>C. caledonica</i>            | Unknown     | Pair        | Australia   | --         | --             | --    |    |       |
| <i>C. novaehollandiae</i>       | Occasional  | Pair        | Widespread  | --         | --             | --    |    |       |
| <i>C. caeruleogrisea</i>        | Unknown     | Pair        | Australia   | --         | --             | --    |    |       |
| <i>C. temminckii</i>            | Unknown     | Pair        | Australia   | --         | --             | --    |    |       |
| <i>C. striata</i>               | Female only | Female only | Indomalayan | --         | --             | --    |    |       |
| <i>C. bicolor</i>               | Unknown     | Pair        | Australia   | --         | --             | --    |    |       |
| <i>C. lineata</i>               | Pair        | Pair        | Australia   | --         | --             | --    |    |       |
| <i>C. boyeri</i>                | Pair        | Pair        | Australia   | --         | --             | --    |    |       |
| <i>C. leucopygia</i>            | Unknown     | Pair        | Australia   | --         | --             | --    |    |       |
| <i>C. papuensis</i>             | Pair        | Pair        | Australia   | --         | --             | --    |    |       |
| <i>C. longicauda</i>            | Pair        | Pair        | Australia   | --         | --             | --    |    |       |
| <i>C. parvula</i>               | Unknown     | Pair        | Australia   | --         | --             | --    |    |       |
| <i>C. abbotti</i>               | Unknown     | Pair        | Australia   | --         | --             | --    |    |       |
| <i>C. analis</i>                | Unknown     | Pair        | Australia   | --         | --             | --    |    |       |
| <i>C. pectoralis</i>            | Pair        | Pair        | Africa      | [502, 503] | --             | --    |    |       |
| <i>C. caesia</i>                | Pair        | Pair        | Africa      | --         | --             | --    |    |       |
| <i>C. azurea</i>                | Unknown     | Pair        | Africa      | --         | --             | --    |    |       |
| <i>C. graueri</i>               | Unknown     | Pair        | Africa      | --         | --             | --    |    |       |
| <i>C. cinerea</i>               | Unknown     | Pair        | Africa      | [502]      | --             | --    |    |       |
| <i>C. typica</i>                | Pair        | Pair        | Africa      | --         | --             | --    |    |       |
| <i>C. newtoni</i>               | Pair        | Pair        | Africa      | --         | --             | --    |    |       |
| <i>C. coerulescens</i>          | Unknown     | Pair        | Indomalayan | --         | --             | --    |    |       |
| <i>C. tenuirostris</i>          | Pair        | Pair        | Australia   | --         | --             | --    |    |       |
| <i>C. dohertyi</i>              | Unknown     | Pair        | Australia   | --         | --             | --    |    |       |
| <i>C. sula</i>                  | Unknown     | Pair        | Australia   | --         | --             | --    |    |       |
| <i>C. dispar</i>                | Unknown     | Pair        | Australia   | --         | --             | --    |    |       |
| <i>C. mindanensis</i>           | Unknown     | Pair        | Indomalayan | --         | --             | --    |    |       |
| <i>C. morio</i>                 | Unknown     | Pair        | Australia   | --         | --             | --    |    |       |
| <i>C. ceramensis</i>            | Unknown     | Pair        | Australia   | --         | --             | --    |    |       |
| <i>C. incerta</i>               | Unknown     | Pair        | Australia   | --         | --             | --    |    |       |
| <i>C. schisticeps</i>           | Unknown     | Pair        | Australia   | --         | --             | --    |    |       |
| <i>C. melas</i>                 | Unknown     | Pair        | Australia   | --         | --             | --    |    |       |

|                            |             |             |             |            |    |    |
|----------------------------|-------------|-------------|-------------|------------|----|----|
| <i>C. montana</i>          | Unknown     | Pair        | Australia   | --         | -- | -- |
| <i>C. holopolia</i>        | Unknown     | Pair        | Australia   | --         | -- | -- |
| <i>C. mcgregori</i>        | Unknown     | Pair        | Indomalayan | --         | -- | -- |
| <i>C. ostenta</i>          | Pair        | Pair        | Indomalayan | --         | -- | -- |
| <i>C. polioptera</i>       | Unknown     | Pair        | Indomalayan | --         | -- | -- |
| <i>C. melaschistos</i>     | Unknown     | Pair        | Indomalayan | --         | -- | -- |
| <i>C. fimbriata</i>        | Unknown     | Pair        | Indomalayan | --         | -- | -- |
| <i>C. melanoptera</i>      | Pair        | Pair        | Indomalayan | --         | -- | -- |
| <i>Campochaera sloetii</i> | Unknown     | Cooperation | Australia   | [502, 504] | -- | -- |
| <i>Lalage melanoleuca</i>  | Unknown     | Pair        | Indomalayan | [502]      | -- | -- |
| <i>L. nigra</i>            | Pair        | Pair        | Indomalayan | --         | -- | -- |
| <i>L. leucopygialis</i>    | Unknown     | Pair        | Australia   | --         | -- | -- |
| <i>L. sueurii</i>          | Unknown     | Pair        | Australia   | --         | -- | -- |
| <i>L. tricolor</i>         | Pair        | Pair        | Australia   | --         | -- | -- |
| <i>L. aurea</i>            | Unknown     | Pair        | Australia   | --         | -- | -- |
| <i>L. moesta</i>           | Subspp      | Subspp      | Australia   | --         | -- | -- |
| <i>L. atrovirens</i>       | Unknown     | Pair        | Australia   | --         | -- | -- |
| <i>L. leucomela</i>        | Pair        | Pair        | Australia   | --         | -- | -- |
| <i>L. maculosa</i>         | Unknown     | Pair        | Australia   | --         | -- | -- |
| <i>L. sharpei</i>          | Unknown     | Pair        | Australia   | --         | -- | -- |
| <i>L. leucopyga</i>        | Unknown     | Pair        | Australia   | --         | -- | -- |
| <i>Campephaga petiti</i>   | Unknown     | Pair        | Africa      | --         | -- | -- |
| <i>C. flava</i>            | Pair        | Pair        | Africa      | --         | -- | -- |
| <i>C. phoenicea</i>        | Pair        | Pair        | Africa      | --         | -- | -- |
| <i>C. quisqualina</i>      | Pair        | Pair        | Africa      | --         | -- | -- |
| <i>Lobotos lobata</i>      | Unknown     | Pair        | Africa      | --         | -- | -- |
| <i>L. oriolina</i>         | Unknown     | Pair        | Africa      | --         | -- | -- |
| <i>Pericrocotus roseus</i> | Pair        | Pair        | Palaearctic | --         | -- | -- |
| <i>P. cantonensis</i>      | Unknown     | Pair        | Palaearctic | --         | -- | -- |
| <i>P. divaricatus</i>      | Pair        | Pair        | Palaearctic | --         | -- | -- |
| <i>P. tegimae</i>          | Subspp      | Subspp      | Palaearctic | --         | -- | -- |
| <i>P. cinnamomeus</i>      | Cooperation | Cooperation | Indomalayan | [502, 505] | -- | -- |
| <i>P. igneus</i>           | Unknown     | Pair        | Indomalayan | [502]      | -- | -- |
| <i>P. lansbergei</i>       | Unknown     | Pair        | Australia   | --         | -- | -- |
| <i>P. erythropygus</i>     | Pair        | Pair        | Indomalayan | --         | -- | -- |
| <i>P. solaris</i>          | Cooperation | Cooperation | Indomalayan | --         | -- | -- |
| <i>P. ethologus</i>        | Pair        | Pair        | Palaearctic | --         | -- | -- |
| <i>P. brevirostris</i>     | Unknown     | Pair        | Indomalayan | --         | -- | -- |
| <i>P. miniatus</i>         | Unknown     | Pair        | Indomalayan | --         | -- | -- |
| <i>P. flammeus</i>         | Unknown     | Cooperation | Indomalayan | --         | -- | -- |
| <i>Hemipus picatus</i>     | Pair        | Pair        | Indomalayan | --         | -- | -- |
| <i>H. hirundinaceus</i>    | Pair        | Pair        | Indomalayan | --         | -- | -- |

**Corvoidea: Falcunculidae**

|                                   |             |             |             |            |                  |       |
|-----------------------------------|-------------|-------------|-------------|------------|------------------|-------|
| <i>Falcunculus frontatus</i>      | Cooperation | Cooperation | Australia   | [459]      | bbdbbbbbbabbbaa  | [433] |
| <i>Rhagologus leucostigma</i>     | Unknown     | Cooperation | Australia   | [506]      | --               | --    |
| <b>Corvoidea: Eupetidae</b>       |             |             |             |            |                  |       |
| <i>Androphobus viridis</i>        | Unknown     | Pair        | Australia   | [434]      | bbdbbbbbbabbbaab | [433] |
| <i>Psophodes olivaceus</i>        | Pair        | Pair        | Australia   | [459, 507] | --               | --    |
| <i>P. nigrogularis</i>            | Pair        | Pair        | Australia   | [459]      | --               | --    |
| <i>P. occidentalis</i>            | Pair        | Pair        | Australia   | --         | --               | --    |
| <i>P. cristatus</i>               | Pair        | Pair        | Australia   | --         | --               | --    |
| <i>Ptilorrhhoa leucosticta</i>    | Pair        | Pair        | Australia   | [434]      | --               | --    |
| <i>P. caerulescens</i>            | Unknown     | Pair        | Australia   | --         | --               | --    |
| <i>P. castanonota</i>             | Unknown     | Pair        | Australia   | --         | --               | --    |
| <i>Eupetes macrocerus</i>         | Unknown     | Pair        | Indomalayan | [508]      | --               | --    |
| <i>Ifrita kowaldi</i>             | Unknown     | Pair        | Australia   | [434]      | --               | --    |
| <b>Corvoidea: Pachycephalidae</b> |             |             |             |            |                  |       |
| <i>Pachycare flavogrisea</i>      | Unknown     | Pair        | Australia   | [434]      | bbdbbbbbbabbbaab | [433] |
| <i>Hylcitrea bonensis</i>         | Unknown     | Pair        | Australia   | [446]      | --               | --    |
| <i>Coracornis raveni</i>          | Unknown     | Pair        | Australia   | --         | --               | --    |
| <i>Aleadryas rufinucha</i>        | Unknown     | Pair        | Australia   | [434]      | --               | --    |
| <i>Pachycephala olivacea</i>      | Pair        | Pair        | Australia   | [459]      | --               | --    |
| <i>P. rufogularis</i>             | Pair        | Pair        | Australia   | --         | --               | --    |
| <i>P. inornata</i>                | Pair        | Pair        | Australia   | --         | --               | --    |
| <i>P. grisola</i>                 | Unknown     | Pair        | Indomalayan | [468]      | --               | --    |
| <i>P. albiventris</i>             | Unknown     | Pair        | Indomalayan | --         | --               | --    |
| <i>P. homeyeri</i>                | Unknown     | Pair        | Indomalayan | --         | --               | --    |
| <i>P. phaionotus</i>              | Unknown     | Pair        | Australia   | [446]      | --               | --    |
| <i>P. hyperythra</i>              | Unknown     | Pair        | Australia   | [434]      | --               | --    |
| <i>P. modesta</i>                 | Unknown     | Pair        | Australia   | --         | --               | --    |
| <i>P. hypoxantha</i>              | Unknown     | Pair        | Indomalayan | [99]       | --               | --    |
| <i>P. sulfuriventer</i>           | Unknown     | Pair        | Australia   | [446]      | --               | --    |
| <i>P. philippinensis</i>          | Unknown     | Pair        | Indomalayan | [468]      | --               | --    |
| <i>P. meyeri</i>                  | Unknown     | Pair        | Australia   | no source  | --               | --    |
| <i>P. griseiceps</i>              | Subspp      | Subspp      | Australia   | [459]      | --               | --    |
| <i>P. simplex</i>                 | Unknown     | Pair        | Australia   | --         | --               | --    |
| <i>P. orpheus</i>                 | Unknown     | Pair        | Australia   | [446]      | --               | --    |
| <i>P. pectoralis</i>              | Pair        | Pair        | Australia   | [459]      | --               | --    |
| <i>P. soror</i>                   | Unknown     | Pair        | Australia   | [434]      | --               | --    |
| <i>P. lorentzi</i>                | Unknown     | Pair        | Australia   | --         | --               | --    |
| <i>P. melanura</i>                | Pair        | Pair        | Australia   | [459]      | --               | --    |
| <i>P. caledonica</i>              | Pair        | Pair        | Australia   | [447]      | --               | --    |
| <i>P. flavifrons</i>              | Unknown     | Pair        | Australia   | [450]      | --               | --    |
| <i>P. jacquinoti</i>              | Unknown     | Pair        | Australia   | --         | --               | --    |
| <i>P. schlegelii</i>              | Unknown     | Pair        | Australia   | [434]      | --               | --    |
| <i>P. nudigula</i>                | Unknown     | Pair        | Australia   | [446]      | --               | --    |

|                                 |            |        |             |            |                 |       |
|---------------------------------|------------|--------|-------------|------------|-----------------|-------|
| <i>P. implicata</i>             | Unknown    | Pair   | Australia   | [434]      | --              | --    |
| <i>P. aurea</i>                 | Unknown    | Pair   | Australia   | --         | --              | --    |
| <i>P. griseonota</i>            | Unknown    | Pair   | Australia   | [446]      | --              | --    |
| <i>P. arctitorquis</i>          | Unknown    | Pair   | Australia   | --         | --              | --    |
| <i>P. monacha</i>               | Unknown    | Pair   | Australia   | [434]      | --              | --    |
| <i>P. leucogastra</i>           | Subspp     | Subspp | Australia   | --         | --              | --    |
| <i>P. rufiventris</i>           | Pair       | Pair   | Australia   | [459]      | --              | --    |
| <i>P. lanioides</i>             | Pair       | Pair   | Australia   | --         | --              | --    |
| <i>Colluricincla umbrina</i>    | Unknown    | Pair   | Australia   | [434]      | --              | --    |
| <i>C. megarhyncha</i>           | Pair       | Pair   | Australia   | [459]      | --              | --    |
| <i>C. boweri</i>                | Pair       | Pair   | Australia   | --         | --              | --    |
| <i>C. woodwardi</i>             | Unknown    | Pair   | Australia   | --         | --              | --    |
| <i>C. harmonica</i>             | Pair       | Pair   | Australia   | --         | --              | --    |
| <i>C. tenebrosa</i>             | Unknown    | Pair   | Australia   | no source  | --              | --    |
| <i>Eulacestoma nigropectus</i>  | Unknown    | Pair   | Australia   | [434]      | --              | --    |
| <b>Corvoidea: Paramythiidae</b> |            |        |             |            |                 |       |
| <i>Oreocharis arfaki</i>        | Unknown    | Pair   | Australia   | [434]      | bbdbbbbbbabbbaa | [433] |
| <i>Paramythia montium</i>       | Pair       | Pair   | Australia   | [434, 509] | --              | --    |
| <b>Corvoidea: Oriolidae</b>     |            |        |             |            |                 |       |
| <i>Oriolus melanotis</i>        | Unknown    | Pair   | Australia   | [446]      | bbdbbbbbbabbbaa | [433] |
| <i>O. bouroensis</i>            | Unknown    | Pair   | Australia   | --         | --              | --    |
| <i>O. forsteni</i>              | Unknown    | Pair   | Australia   | --         | --              | --    |
| <i>O. phaeochromus</i>          | Unknown    | Pair   | Australia   | --         | --              | --    |
| <i>O. szalayi</i>               | Pair       | Pair   | Australia   | [434]      | --              | --    |
| <i>O. sagittatus</i>            | Pair       | Pair   | Australia   | [510]      | --              | --    |
| <i>O. flavocinctus</i>          | Pair       | Pair   | Australia   | --         | --              | --    |
| <i>O. xanthonotus</i>           | Unknown    | Pair   | Indomalayan | [468]      | --              | --    |
| <i>O. steerii</i>               | Unknown    | Pair   | Indomalayan | --         | --              | --    |
| <i>O. abiloris</i>              | Subspp     | Subspp | Indomalayan | --         | --              | --    |
| <i>O. isabellae</i>             | Unknown    | Pair   | Indomalayan | [455]      | --              | --    |
| <i>O. oriolus</i>               | Occasional | Pair   | Paelearctic | [511]      | --              | --    |
| <i>O. auratus</i>               | Pair       | Pair   | Africa      | [512]      | --              | --    |
| <i>O. chinensis</i>             | Pair       | Pair   | Paelearctic | [513]      | --              | --    |
| <i>O. tenuirostris</i>          | Unknown    | Pair   | Paelearctic | --         | --              | --    |
| <i>O. chlorocephalus</i>        | Unknown    | Pair   | Africa      | [512]      | --              | --    |
| <i>O. crassirostris</i>         | Unknown    | Pair   | Africa      | --         | --              | --    |
| <i>O. brachyrhynchus</i>        | Pair       | Pair   | Africa      | --         | --              | --    |
| <i>O. monacha</i>               | Unknown    | Pair   | Africa      | --         | --              | --    |
| <i>O. larvatus</i>              | Pair       | Pair   | Africa      | --         | --              | --    |
| <i>O. percivali</i>             | Unknown    | Pair   | Africa      | --         | --              | --    |
| <i>O. nigripennis</i>           | Unknown    | Pair   | Africa      | --         | --              | --    |
| <i>O. xanthornus</i>            | Pair       | Pair   | Indomalayan | [514]      | --              | --    |
| <i>O. hosii</i>                 | Unknown    | Pair   | Indomalayan | [99]       | --              | --    |

|                                     |             |             |             |            |                     |       |    |       |
|-------------------------------------|-------------|-------------|-------------|------------|---------------------|-------|----|-------|
| <i>O. cruentus</i>                  | Unknown     | Pair        | Indomalayan | --         | --                  | --    |    |       |
| <i>O. traillii</i>                  | Pair        | Pair        | Indomalayan | [514]      | --                  | --    |    |       |
| <i>O. mellianus</i>                 | Unknown     | Pair        | Indomalayan | [455]      | --                  | --    |    |       |
| <i>Sphecotheres hypoleucus</i>      | Unknown     | Cooperation | Australia   | [446]      | --                  | --    |    |       |
| <i>S. viridis</i>                   | Cooperation | Cooperation | Australia   | [515]      | --                  | --    |    |       |
| <b>Corvoidea: Artamidae</b>         |             |             |             |            |                     |       |    |       |
| <i>Cracticus mentalis</i>           | Unknown     | Pair        | Australia   | [434]      | bbdbbbbbbabbabbbbaa | [433] |    |       |
| <i>C. torquatus</i>                 | Cooperation | Cooperation | Australia   | [516]      | --                  | --    |    |       |
| <i>C. cassicus</i>                  | Cooperation | Cooperation | Australia   | [434]      | --                  | --    |    |       |
| <i>C. louisianensis</i>             | Unknown     | Cooperation | Australia   | --         | --                  | --    |    |       |
| <i>C. nigrogularis</i>              | Cooperation | Cooperation | Australia   | [516]      | --                  | --    |    |       |
| <i>C. quoyi</i>                     | Pair        | Pair        | Australia   | [510]      | --                  | --    |    |       |
| <i>Gymnorhina tibicen</i>           | Cooperation | Cooperation | Australia   | [517]      | --                  | --    |    |       |
| <i>Strepera graculina</i>           | Pair        | Pair        | Australia   | [510]      | --                  | --    |    |       |
| <i>S. fuliginosa</i>                | Pair        | Pair        | Australia   | --         | --                  | --    |    |       |
| <i>S. versicolor</i>                | Pair        | Pair        | Australia   | --         | --                  | --    |    |       |
| <i>Artamus fuscus</i>               | Unknown     | Cooperation | Indomalayan | [514]      | --                  | --    |    |       |
| <i>A. leucorhynchus</i>             | Cooperation | Cooperation | Australia   | [434, 516] | --                  | --    |    |       |
| <i>A. monachus</i>                  | Unknown     | Cooperation | Australia   | [446]      | --                  | --    |    |       |
| <i>A. maximus</i>                   | Cooperation | Cooperation | Australia   | [434]      | --                  | --    |    |       |
| <i>A. insignis</i>                  | Unknown     | Cooperation | Australia   | --         | --                  | --    |    |       |
| <i>A. mentalis</i>                  | Cooperation | Cooperation | Australia   | [518]      | --                  | --    |    |       |
| <i>A. personatus</i>                | Pair        | Pair        | Australia   | [510]      | --                  | --    |    |       |
| <i>A. superciliosus</i>             | Pair        | Pair        | Australia   | --         | --                  | --    |    |       |
| <i>A. cinereus</i>                  | Cooperation | Cooperation | Australia   | [519]      | --                  | --    |    |       |
| <i>A. cyanopterus</i>               | Cooperation | Cooperation | Australia   | [520]      | --                  | --    |    |       |
| <i>A. minor</i>                     | Cooperation | Cooperation | Australia   | [516]      | --                  | --    |    |       |
| <i>Pityriasis gymnocephala</i>      | Suspected   | Cooperation | Indomalayan | [99, 521]  | --                  | --    |    |       |
| <i>Peltops blainvillii</i>          | Unknown     | Cooperation | Australia   | [434]      | --                  | --    |    |       |
| <i>P. montanus</i>                  | Unknown     | Cooperation | Australia   | --         | --                  | --    |    |       |
| <b>Corvoidea: Malaconotidae</b>     |             |             |             |            |                     |       |    |       |
| <i>Prionops plumatus</i>            | Cooperation | Cooperation | Africa      | [522]      | bbdbbbbbbabbabbbaba | [433] | a  | [523] |
| <i>P. poliophus</i>                 | Cooperation | Cooperation | Africa      | --         | --                  | --    | -- | --    |
| <i>P. alberti</i>                   | Cooperation | Cooperation | Africa      | --         | --                  | --    | -- | --    |
| <i>P. caniceps</i>                  | Cooperation | Cooperation | Africa      | --         | --                  | --    | -- | --    |
| <i>P. rufiventris</i>               | Subspp      | Subspp      | Africa      | --         | --                  | --    | -- | --    |
| <i>P. retzii</i>                    | Cooperation | Cooperation | Africa      | --         | --                  | --    | -- | --    |
| <i>P. gabela</i>                    | Suspected   | Cooperation | Africa      | --         | --                  | --    | -- | --    |
| <i>P. scopifrons</i>                | Cooperation | Cooperation | Africa      | --         | --                  | --    | -- | --    |
| <i>Bias flammulatus</i>             | Suspected   | Cooperation | Africa      | [524]      | --                  | --    | -- | --    |
| <i>B. musicus</i>                   | Suspected   | Cooperation | Africa      | [522]      | --                  | --    | -- | --    |
| <i>Pseudobias wardi</i>             | Unknown     | Pair        | Africa      | [525]      | --                  | --    | -- | --    |
| <i>Calicalicus madagascariensis</i> | Pair        | Pair        | Africa      | --         | --                  | --    | -- | --    |



|                                    |             |             |        |           |    |    |    |    |
|------------------------------------|-------------|-------------|--------|-----------|----|----|----|----|
| <i>Schetba rufa</i>                | Cooperation | Cooperation | Africa | [526-528] | -- | -- | -- | -- |
| <i>Vanga curvirostris</i>          | Pair        | Pair        | Africa | [529]     | -- | -- | -- | -- |
| <i>Xenopirostris xenopirostris</i> | Unknown     | Pair        | Africa | [525]     | -- | -- | -- | -- |
| <i>X. damii</i>                    | Pair        | Pair        | Africa | [530]     | -- | -- | -- | -- |
| <i>X. polleni</i>                  | Pair        | Pair        | Africa | [531]     | -- | -- | -- | -- |
| <i>Artamella viridis</i>           | Group       | Pair        | Africa | [532]     | -- | -- | -- | -- |
| <i>Falcolea palliata</i>           | Unknown     | Cooperation | Africa | [533]     | -- | -- | -- | -- |
| <i>Leptopterus chabert</i>         | Cooperation | Cooperation | Africa | [534]     | -- | -- | -- | -- |
| <i>Cyanolanius madagascarinus</i>  | Unknown     | Pair        | Africa | [525]     | -- | -- | -- | -- |
| <i>Oriolia bernieri</i>            | Cooperation | Cooperation | Africa | [535]     | -- | -- | -- | -- |
| <i>Euryceros prevostii</i>         | Pair        | Pair        | Africa | [536]     | -- | -- | -- | -- |
| <i>Tylas eduardi</i>               | Unknown     | Pair        | Africa | [525]     | -- | -- | -- | -- |
| <i>Hypositta corallirostris</i>    | Unknown     | Pair        | Africa | --        | -- | -- | -- | -- |
| <i>Lanioturdus torquatus</i>       | Pair        | Pair        | Africa | [522]     | -- | -- | b  | -- |
| <i>Batis diops</i>                 | Unknown     | Pair        | Africa | [524]     | -- | -- | -- | -- |
| <i>B. margaritae</i>               | Unknown     | Pair        | Africa | --        | -- | -- | -- | -- |
| <i>B. mixta</i>                    | Unknown     | Pair        | Africa | --        | -- | -- | -- | -- |
| <i>B. reichenowi</i>               | Subspp      | Subspp      | Africa | --        | -- | -- | -- | -- |
| <i>B. dimorpha</i>                 | Subspp      | Subspp      | Africa | --        | -- | -- | -- | -- |
| <i>B. capensis</i>                 | Suspected   | Cooperation | Africa | --        | -- | -- | -- | -- |
| <i>B. fratrum</i>                  | Suspected   | Cooperation | Africa | --        | -- | -- | -- | -- |
| <i>B. molitor</i>                  | Suspected   | Cooperation | Africa | --        | -- | -- | -- | -- |
| <i>B. soror</i>                    | Suspected   | Cooperation | Africa | --        | -- | -- | -- | -- |
| <i>B. pririt</i>                   | Pair        | Pair        | Africa | --        | -- | -- | -- | -- |
| <i>B. senegalensis</i>             | Group       | Pair        | Africa | --        | -- | -- | -- | -- |
| <i>B. orientalis</i>               | Unknown     | Pair        | Africa | --        | -- | -- | -- | -- |
| <i>B. minor</i>                    | Pair        | Pair        | Africa | --        | -- | -- | -- | -- |
| <i>B. perkeo</i>                   | Unknown     | Pair        | Africa | --        | -- | -- | -- | -- |
| <i>B. minima</i>                   | Unknown     | Pair        | Africa | --        | -- | -- | -- | -- |
| <i>B. ituriensis</i>               | Unknown     | Pair        | Africa | --        | -- | -- | -- | -- |
| <i>B. occulta</i>                  | Subspp      | Subspp      | Africa | --        | -- | -- | -- | -- |
| <i>B. poensis</i>                  | Unknown     | Pair        | Africa | --        | -- | -- | -- | -- |
| <i>B. minulla</i>                  | Unknown     | Pair        | Africa | --        | -- | -- | -- | -- |
| <i>Platysteira cyanea</i>          | Pair        | Pair        | Africa | --        | -- | -- | -- | -- |
| <i>P. laticincta</i>               | Unknown     | Pair        | Africa | --        | -- | -- | -- | -- |
| <i>P. albifrons</i>                | Unknown     | Pair        | Africa | --        | -- | -- | -- | -- |
| <i>P. peltata</i>                  | Cooperation | Cooperation | Africa | [522]     | -- | -- | -- | -- |
| <i>P. castanea</i>                 | Cooperation | Cooperation | Africa | [524]     | -- | -- | -- | -- |
| <i>P. tonsa</i>                    | Cooperation | Cooperation | Africa | --        | -- | -- | -- | -- |
| <i>P. blissetti</i>                | Cooperation | Cooperation | Africa | --        | -- | -- | -- | -- |
| <i>P. chalybea</i>                 | Cooperation | Cooperation | Africa | [522]     | -- | -- | -- | -- |
| <i>P. jamesoni</i>                 | Unknown     | Cooperation | Africa | --        | -- | -- | -- | -- |
| <i>P. concreta</i>                 | Unknown     | Pair        | Africa | --        | -- | -- | -- | -- |

|                              |            |        |        |       |    |    |    |    |
|------------------------------|------------|--------|--------|-------|----|----|----|----|
| <i>Nilous afer</i>           | Pair       | Pair   | Africa | --    | -- | -- | C  | -- |
| <i>Dryoscopus gambensis</i>  | Unknown    | Pair   | Africa | --    | -- | -- | -- | -- |
| <i>D. pringlii</i>           | Unknown    | Pair   | Africa | --    | -- | -- | -- | -- |
| <i>D. cubla</i>              | Occasional | Pair   | Africa | [537] | -- | -- | -- | -- |
| <i>D. senegalensis</i>       | Pair       | Pair   | Africa | [512] | -- | -- | -- | -- |
| <i>D. angolensis</i>         | Unknown    | Pair   | Africa | [522] | -- | -- | -- | -- |
| <i>D. sabini</i>             | Unknown    | Pair   | Africa | --    | -- | -- | -- | -- |
| <i>Tchagra minuta</i>        | Unknown    | Pair   | Africa | --    | -- | -- | -- | -- |
| <i>T. anchietae</i>          | Subspp     | Subspp | Africa | --    | -- | -- | -- | -- |
| <i>T. senegala</i>           | Pair       | Pair   | Africa | --    | -- | -- | -- | -- |
| <i>T. australis</i>          | Pair       | Pair   | Africa | --    | -- | -- | -- | -- |
| <i>T. jamesi</i>             | Pair       | Pair   | Africa | --    | -- | -- | -- | -- |
| <i>T. tchagra</i>            | Pair       | Pair   | Africa | --    | -- | -- | -- | -- |
| <i>Laniarius ruficeps</i>    | Unknown    | Pair   | Africa | --    | -- | -- | -- | -- |
| <i>L. luehderi</i>           | Pair       | Pair   | Africa | --    | -- | -- | -- | -- |
| <i>L. brauni</i>             | Unknown    | Pair   | Africa | --    | -- | -- | -- | -- |
| <i>L. amboimensis</i>        | Unknown    | Pair   | Africa | --    | -- | -- | -- | -- |
| <i>L. liberatus</i>          | Unknown    | Pair   | Africa | --    | -- | -- | -- | -- |
| <i>L. turatii</i>            | Unknown    | Pair   | Africa | --    | -- | -- | -- | -- |
| <i>L. aethiopicus</i>        | Pair       | Pair   | Africa | --    | -- | -- | -- | -- |
| <i>L. bicolor</i>            | Pair       | Pair   | Africa | --    | -- | -- | -- | -- |
| <i>L. ferrugineus</i>        | Pair       | Pair   | Africa | --    | -- | -- | -- | -- |
| <i>L. barbarus</i>           | Unknown    | Pair   | Africa | --    | -- | -- | -- | -- |
| <i>L. erythrogaster</i>      | Unknown    | Pair   | Africa | --    | -- | -- | -- | -- |
| <i>L. atrococcineus</i>      | Pair       | Pair   | Africa | --    | -- | -- | -- | -- |
| <i>L. mufumbiri</i>          | Unknown    | Pair   | Africa | --    | -- | -- | -- | -- |
| <i>L. atroflavus</i>         | Pair       | Pair   | Africa | --    | -- | -- | -- | -- |
| <i>L. funebris</i>           | Pair       | Pair   | Africa | --    | -- | -- | -- | -- |
| <i>L. leucorhynchus</i>      | Unknown    | Pair   | Africa | --    | -- | -- | -- | -- |
| <i>L. poensis</i>            | Unknown    | Pair   | Africa | --    | -- | -- | -- | -- |
| <i>L. fuelleborni</i>        | Unknown    | Pair   | Africa | --    | -- | -- | -- | -- |
| <i>Rhodophoneus cruentus</i> | Unknown    | Pair   | Africa | --    | -- | -- | -- | -- |
| <i>Telophorus zeylonus</i>   | Pair       | Pair   | Africa | --    | -- | -- | -- | -- |
| <i>T. bocagei</i>            | Unknown    | Pair   | Africa | --    | -- | -- | -- | -- |
| <i>T. sulfureopectus</i>     | Pair       | Pair   | Africa | --    | -- | -- | -- | -- |
| <i>T. olivaceus</i>          | Pair       | Pair   | Africa | --    | -- | -- | -- | -- |
| <i>T. multicolor</i>         | Unknown    | Pair   | Africa | --    | -- | -- | -- | -- |
| <i>T. nigrifrons</i>         | Unknown    | Pair   | Africa | --    | -- | -- | -- | -- |
| <i>T. kupeensis</i>          | Unknown    | Pair   | Africa | --    | -- | -- | -- | -- |
| <i>T. viridis</i>            | Pair       | Pair   | Africa | --    | -- | -- | -- | -- |
| <i>T. dohertyi</i>           | Unknown    | Pair   | Africa | --    | -- | -- | -- | -- |
| <i>T. quadricolor</i>        | Subspp     | Subspp | Africa | --    | -- | -- | -- | -- |
| <i>Malaconotus cruentus</i>  | Pair       | Pair   | Africa | --    | -- | -- | -- | -- |

|                                |             |             |             |            |                     |       |    |    |
|--------------------------------|-------------|-------------|-------------|------------|---------------------|-------|----|----|
| <i>M. lagdeni</i>              | Pair        | Pair        | Africa      | --         | --                  | --    | -- | -- |
| <i>M. gladiator</i>            | Unknown     | Pair        | Africa      | --         | --                  | --    | -- | -- |
| <i>M. blanchoti</i>            | Pair        | Pair        | Africa      | --         | --                  | --    | -- | -- |
| <i>M. monteiri</i>             | Unknown     | Pair        | Africa      | --         | --                  | --    | -- | -- |
| <i>M. alius</i>                | Unknown     | Pair        | Africa      | --         | --                  | --    | -- | -- |
| <i>Philentoma pyrhopterum</i>  | Unknown     | Pair        | Indomalayan | --         | --                  | --    | d  | -- |
| <i>P. velatum</i>              | Unknown     | Pair        | Indomalayan | --         | --                  | --    | -- | -- |
| <i>Tephrodornis gularis</i>    | Pair        | Pair        | Indomalayan | [502, 522] | --                  | --    | -- | -- |
| <i>T. pondicerianus</i>        | Pair        | Pair        | Indomalayan | --         | --                  | --    | -- | -- |
| <b>Corvoidea: Aegithinidae</b> |             |             |             |            |                     |       |    |    |
| <i>Aegithina tiphia</i>        | Pair        | Pair        | Indomalayan | [538]      | bbdbbbbbbabbabbbabb | [433] |    |    |
| <i>A. nigrolutea</i>           | Pair        | Pair        | Indomalayan | --         | --                  | --    |    |    |
| <i>A. viridissima</i>          | Pair        | Pair        | Indomalayan | --         | --                  | --    |    |    |
| <i>A. lafresnayeii</i>         | Unknown     | Pair        | Indomalayan | --         | --                  | --    |    |    |
| <b>Corvoidea: Dicruridae</b>   |             |             |             |            |                     |       |    |    |
| <i>Dicrurus ludwigii</i>       | Unknown     | Pair        | Africa      | [512]      | bbdbbbbbbabbabbbba  | [433] |    |    |
| <i>D. atripennis</i>           | Unknown     | Pair        | Africa      | --         | --                  | --    |    |    |
| <i>D. adsimilis</i>            | Pair        | Pair        | Africa      | --         | --                  | --    |    |    |
| <i>D. modestus</i>             | Unknown     | Pair        | Africa      | --         | --                  | --    |    |    |
| <i>D. aldabranus</i>           | Unknown     | Pair        | Africa      | [539]      | --                  | --    |    |    |
| <i>D. fuscipennis</i>          | Pair        | Pair        | Africa      | [445]      | --                  | --    |    |    |
| <i>D. forficatus</i>           | Pair        | Pair        | Africa      | [525]      | --                  | --    |    |    |
| <i>D. waldenii</i>             | Unknown     | Pair        | Africa      | [445]      | --                  | --    |    |    |
| <i>D. macrocercus</i>          | Cooperation | Cooperation | Indomalayan | [540, 541] | --                  | --    |    |    |
| <i>D. leucophaeus</i>          | Unknown     | Pair        | Indomalayan | [514]      | --                  | --    |    |    |
| <i>D. caerulescens</i>         | Pair        | Pair        | Indomalayan | --         | --                  | --    |    |    |
| <i>D. annectans</i>            | Pair        | Pair        | Indomalayan | --         | --                  | --    |    |    |
| <i>D. aeneus</i>               | Pair        | Pair        | Indomalayan | --         | --                  | --    |    |    |
| <i>D. remifer</i>              | Pair        | Pair        | Indomalayan | --         | --                  | --    |    |    |
| <i>D. hottentottus</i>         | Pair        | Pair        | Australia   | --         | --                  | --    |    |    |
| <i>D. sumatranus</i>           | Unknown     | Pair        | Indomalayan | [445]      | --                  | --    |    |    |
| <i>D. montanus</i>             | Unknown     | Pair        | Australia   | [446]      | --                  | --    |    |    |
| <i>D. densus</i>               | Unknown     | Pair        | Australia   | --         | --                  | --    |    |    |
| <i>D. balicassius</i>          | Unknown     | Pair        | Indomalayan | [468]      | --                  | --    |    |    |
| <i>D. bracteatus</i>           | Pair        | Pair        | Australia   | [510]      | --                  | --    |    |    |
| <i>D. megarhynchus</i>         | Unknown     | Pair        | Australia   | [434]      | --                  | --    |    |    |
| <i>D. andamanensis</i>         | Pair        | Pair        | Indomalayan | [514]      | --                  | --    |    |    |
| <i>D. paradiseus</i>           | Pair        | Pair        | Indomalayan | --         | --                  | --    |    |    |
| <b>Corvoidea: Rhipiduridae</b> |             |             |             |            |                     |       |    |    |
| <i>Rhipidura hypoxantha</i>    | Pair        | Pair        | Palaearctic | [513]      | bbdbbbbbbabbabbbba  | [433] |    |    |
| <i>R. supercilialis</i>        | Unknown     | Pair        | Indomalayan | [468]      | --                  | --    |    |    |
| <i>R. cyaniceps</i>            | Unknown     | Pair        | Indomalayan | --         | --                  | --    |    |    |
| <i>R. phoenicura</i>           | Unknown     | Pair        | Indomalayan | no source  | --                  | --    |    |    |

|                                 |            |      |             |            |                     |       |
|---------------------------------|------------|------|-------------|------------|---------------------|-------|
| <i>R. nigrocinnamomea</i>       | Unknown    | Pair | Indomalayan | [468]      | --                  | --    |
| <i>R. albicollis</i>            | Pair       | Pair | Indomalayan | [513]      | --                  | --    |
| <i>R. euryura</i>               | Unknown    | Pair | Indomalayan | no source  | --                  | --    |
| <i>R. aureola</i>               | Pair       | Pair | Indomalayan | [513]      | --                  | --    |
| <i>R. javanica</i>              | Pair       | Pair | Indomalayan | [468]      | --                  | --    |
| <i>R. perlata</i>               | Unknown    | Pair | Indomalayan | [99]       | --                  | --    |
| <i>R. leucophrys</i>            | Pair       | Pair | Australia   | [542]      | --                  | --    |
| <i>R. diluta</i>                | Unknown    | Pair | Australia   | [446]      | --                  | --    |
| <i>R. rufiventris</i>           | Pair       | Pair | Australia   | [542]      | --                  | --    |
| <i>R. fusciorufa</i>            | Unknown    | Pair | Australia   | [445]      | --                  | --    |
| <i>R. cockerelli</i>            | Unknown    | Pair | Australia   | [125, 434] | --                  | --    |
| <i>R. threnothorax</i>          | Unknown    | Pair | Australia   | [434]      | --                  | --    |
| <i>R. maculipectus</i>          | Unknown    | Pair | Australia   | --         | --                  | --    |
| <i>R. leucothorax</i>           | Pair       | Pair | Australia   | --         | --                  | --    |
| <i>R. atra</i>                  | Pair       | Pair | Australia   | --         | --                  | --    |
| <i>R. hyperythra</i>            | Occasional | Pair | Australia   | --         | --                  | --    |
| <i>R. albolimbata</i>           | Pair       | Pair | Australia   | --         | --                  | --    |
| <i>R. phasiana</i>              | Unknown    | Pair | Australia   | [542]      | --                  | --    |
| <i>R. fuliginosa</i>            | Pair       | Pair | Australia   | --         | --                  | --    |
| <i>R. drownei</i>               | Unknown    | Pair | Australia   | [434]      | --                  | --    |
| <i>R. tenebrosa</i>             | Unknown    | Pair | Australia   | [445]      | --                  | --    |
| <i>R. rennelliana</i>           | Unknown    | Pair | Australia   | no source  | --                  | --    |
| <i>R. spilodera</i>             | Pair       | Pair | Australia   | [447]      | --                  | --    |
| <i>R. personata</i>             | Unknown    | Pair | Australia   | [450]      | --                  | --    |
| <i>R. nebulosa</i>              | Unknown    | Pair | Australia   | --         | --                  | --    |
| <i>R. brachyrhyncha</i>         | Unknown    | Pair | Australia   | [434]      | --                  | --    |
| <i>R. teysmanni</i>             | Unknown    | Pair | Australia   | [446]      | --                  | --    |
| <i>R. superflua</i>             | Unknown    | Pair | Australia   | --         | --                  | --    |
| <i>R. dedemi</i>                | Unknown    | Pair | Australia   | --         | --                  | --    |
| <i>R. opistherythra</i>         | Unknown    | Pair | Australia   | [445]      | --                  | --    |
| <i>R. lepida</i>                | Unknown    | Pair | Australia   | no source  | --                  | --    |
| <i>R. rufidorsa</i>             | Unknown    | Pair | Australia   | [434]      | --                  | --    |
| <i>R. dahli</i>                 | Unknown    | Pair | Australia   | --         | --                  | --    |
| <i>R. matthiae</i>              | Unknown    | Pair | Australia   | --         | --                  | --    |
| <i>R. malitae</i>               | Unknown    | Pair | Australia   | [445]      | --                  | --    |
| <i>R. kubaryi</i>               | Unknown    | Pair | Australia   | no source  | --                  | --    |
| <i>R. rufifrons</i>             | Pair       | Pair | Australia   | [542]      | --                  | --    |
| <i>R. semirubra</i>             | Unknown    | Pair | Australia   | [434]      | --                  | --    |
| <i>Chaetorhynchus papuensis</i> | Unknown    | Pair | Australia   | --         | --                  | --    |
| <b>Corvoidea: Paradisaeidae</b> |            |      |             |            |                     |       |
| <i>Lycocorax pyrrhopterus</i>   | Unknown    | Pair | Australia   | [457]      | bbdbbbbbbabbdbbbbaa | [433] |
| <i>Manucodia atra</i>           | Pair       | Pair | Australia   | --         | --                  | --    |
| <i>M. chalybata</i>             | Pair       | Pair | Australia   | --         | --                  | --    |

|                                |             |             |           |            |                       |            |
|--------------------------------|-------------|-------------|-----------|------------|-----------------------|------------|
| <i>M. comrii</i>               | Unknown     | Pair        | Australia | --         | --                    | --         |
| <i>M. jobiensis</i>            | Unknown     | Pair        | Australia | --         | --                    | --         |
| <i>M. keraudrenii</i>          | Pair        | Pair        | Australia | --         | --                    | --         |
| <i>Semioptera wallacii</i>     | Female only | Female only | Australia | --         | --                    | --         |
| <i>Paradigalla carunculata</i> | Unknown     | Female only | Australia | --         | --                    | --         |
| <i>P. brevicauda</i>           | Female only | Female only | Australia | --         | --                    | --         |
| <i>Epimachus fastuosus</i>     | Female only | Female only | Australia | --         | --                    | --         |
| <i>E. meyeri</i>               | Female only | Female only | Australia | --         | --                    | --         |
| <i>E. albertsi</i>             | Female only | Female only | Australia | --         | --                    | --         |
| <i>E. bruijnii</i>             | Female only | Female only | Australia | --         | --                    | --         |
| <i>Lophorina superba</i>       | Female only | Female only | Australia | --         | --                    | --         |
| <i>Parotia sefilata</i>        | Female only | Female only | Australia | --         | --                    | --         |
| <i>P. carolae</i>              | Female only | Female only | Australia | --         | --                    | --         |
| <i>P. lawesii</i>              | Female only | Female only | Australia | --         | --                    | --         |
| <i>P. helenae</i>              | Subspp      | Subspp      | Australia | --         | --                    | --         |
| <i>P. wahnesi</i>              | Female only | Female only | Australia | --         | --                    | --         |
| <i>Ptiloris magnificus</i>     | Female only | Female only | Australia | --         | --                    | --         |
| <i>P. intercedens</i>          | Subspp      | Subspp      | Australia | --         | --                    | --         |
| <i>P. victoriae</i>            | Female only | Female only | Australia | --         | --                    | --         |
| <i>P. paradiseus</i>           | Female only | Female only | Australia | --         | --                    | --         |
| <i>Cicinnurus magnificus</i>   | Female only | Female only | Australia | --         | --                    | --         |
| <i>C. republica</i>            | Female only | Female only | Australia | --         | --                    | --         |
| <i>C. regius</i>               | Female only | Female only | Australia | --         | --                    | --         |
| <i>Astrapia nigra</i>          | Unknown     | Female only | Australia | --         | --                    | --         |
| <i>A. splendidissima</i>       | Female only | Female only | Australia | --         | --                    | --         |
| <i>A. mayeri</i>               | Female only | Female only | Australia | --         | --                    | --         |
| <i>A. stephaniae</i>           | Female only | Female only | Australia | --         | --                    | --         |
| <i>A. rothschildi</i>          | Female only | Female only | Australia | --         | --                    | --         |
| <i>Pteridophora alberti</i>    | Female only | Female only | Australia | --         | --                    | --         |
| <i>Seleucidis melanoleuca</i>  | Female only | Female only | Australia | --         | --                    | --         |
| <i>Paradisaea rubra</i>        | Female only | Female only | Australia | --         | --                    | --         |
| <i>P. minor</i>                | Female only | Female only | Australia | --         | --                    | --         |
| <i>P. apoda</i>                | Female only | Female only | Australia | --         | --                    | --         |
| <i>P. raggiana</i>             | Female only | Female only | Australia | --         | --                    | --         |
| <i>P. decora</i>               | Female only | Female only | Australia | --         | --                    | --         |
| <i>P. guillemi</i>             | Female only | Female only | Australia | --         | --                    | --         |
| <i>P. rudolphi</i>             | Female only | Female only | Australia | --         | --                    | --         |
| <b>Corvoidea: Corcoracidae</b> |             |             |           |            |                       |            |
| <i>Corcorax melanorhamphos</i> | Cooperation | Cooperation | Australia | [543, 544] | bbdbbbbbbabbdbbbbabab | [433]      |
| <i>Struthidea cinerea</i>      | Cooperation | Cooperation | Australia | [545]      | --                    | --         |
| <b>Corvoidea: Monarchidae</b>  |             |             |           |            |                       |            |
| <i>Trochocercus nitens</i>     | Pair        | Pair        | Africa    | [524]      | bbdbbbbbbabbdbbbbabab | [433, 546] |
| <i>T. cyanomelas</i>           | Pair        | Pair        | Africa    | --         | --                    | --         |

|                                       |             |             |             |            |    |       |
|---------------------------------------|-------------|-------------|-------------|------------|----|-------|
| <i>Hypothymis helenae</i>             | Unknown     | Pair        | Indomalayan | [468]      | -- | --    |
| <i>H. coelestis</i>                   | Unknown     | Pair        | Indomalayan | [455]      | -- | --    |
| <i>H. azurea</i>                      | Pair        | Pair        | Indomalayan | [468]      | -- | --    |
| <i>Eutrichomyias rowleyi</i>          | Unknown     | Pair        | Indomalayan | [455]      | -- | --    |
| <i>Terpsiphone rufiventer</i>         | Pair        | Pair        | Africa      | [524]      | -- | --    |
| <i>T. bedfordi</i>                    | Unknown     | Pair        | Africa      | --         | -- | --    |
| <i>T. rufocinerea</i>                 | Pair        | Pair        | Africa      | --         | -- | --    |
| <i>T. viridis</i>                     | Pair        | Pair        | Africa      | --         | -- | --    |
| <i>T. atrochalybeia</i>               | Pair        | Pair        | Africa      | --         | -- | --    |
| <i>T. mutata</i>                      | Pair        | Pair        | Africa      | [547, 548] | -- | --    |
| <i>T. corvina</i>                     | Pair        | Pair        | Africa      | [539]      | -- | --    |
| <i>T. bourbonensis</i>                | Pair        | Pair        | Africa      | [549]      | -- | --    |
| <i>T. paradisi</i>                    | Pair        | Pair        | Indomalayan | [550]      | -- | --    |
| <i>T. atrocaudata</i>                 | Pair        | Pair        | Palaearctic | [551]      | -- | --    |
| <i>T. cinnamomea</i>                  | Pair        | Pair        | Indomalayan | [468]      | -- | --    |
| <i>T. cyanescens</i>                  | Unknown     | Pair        | Indomalayan | --         | -- | --    |
| <i>Chasiempis sandwichensis</i>       | Unknown     | Pair        | Australia   | [552]      | -- | [433] |
| <i>Pomarea dimidiata</i>              | Cooperation | Cooperation | Australia   | [553]      | -- | --    |
| <i>P. nigra</i>                       | Unknown     | Pair        | Australia   | [554]      | -- | --    |
| <i>P. iphis</i>                       | Pair        | Pair        | Australia   | --         | -- | --    |
| <i>P. mendozae</i>                    | Pair        | Pair        | Australia   | --         | -- | --    |
| <i>P. whitneyi</i>                    | Pair        | Pair        | Australia   | --         | -- | --    |
| <i>Mayrornis versicolor</i>           | Unknown     | Pair        | Australia   | [450]      | -- | --    |
| <i>M. lessoni</i>                     | Unknown     | Pair        | Australia   | --         | -- | --    |
| <i>M. schistaceus</i>                 | Unknown     | Pair        | Australia   | [445]      | -- | --    |
| <i>Neolalage banksiana</i>            | Unknown     | Pair        | Australia   | [449]      | -- | --    |
| <i>Clytorhynchus pachycephaloides</i> | Pair        | Pair        | Australia   | [447]      | -- | --    |
| <i>C. vitiensis</i>                   | Unknown     | Pair        | Australia   | [450]      | -- | --    |
| <i>C. nigrogularis</i>                | Unknown     | Pair        | Australia   | --         | -- | --    |
| <i>C. hamlini</i>                     | Unknown     | Pair        | Australia   | no source  | -- | --    |
| <i>Metabolus rugensis</i>             | Unknown     | Pair        | Australia   | [445]      | -- | --    |
| <i>Monarcha axillaris</i>             | Unknown     | Pair        | Australia   | [434]      | -- | --    |
| <i>M. rubiensis</i>                   | Unknown     | Pair        | Australia   | --         | -- | --    |
| <i>M. cinerascens</i>                 | Unknown     | Pair        | Australia   | --         | -- | --    |
| <i>M. frater</i>                      | Pair        | Pair        | Australia   | [542]      | -- | --    |
| <i>M. melanopsis</i>                  | Pair        | Pair        | Australia   | --         | -- | --    |
| <i>M. erythrostrictus</i>             | Unknown     | Pair        | Australia   | [125]      | -- | --    |
| <i>M. castaneiventris</i>             | Unknown     | Pair        | Australia   | [434]      | -- | --    |
| <i>M. richardsii</i>                  | Unknown     | Pair        | Australia   | no source  | -- | --    |
| <i>M. pileatus</i>                    | Unknown     | Pair        | Australia   | [446]      | -- | --    |
| <i>M. castus</i>                      | Unknown     | Pair        | Australia   | no source  | -- | --    |
| <i>M. leucotis</i>                    | Pair        | Pair        | Australia   | [542]      | -- | --    |
| <i>M. guttulus</i>                    | Pair        | Pair        | Australia   | [434]      | -- | --    |

|                                     |         |      |           |            |    |    |
|-------------------------------------|---------|------|-----------|------------|----|----|
| <i>M. mundus</i>                    | Unknown | Pair | Australia | [446]      | -- | -- |
| <i>M. trivirgatus</i>               | Pair    | Pair | Australia | [542]      | -- | -- |
| <i>M. sacerdotum</i>                | Unknown | Pair | Australia | [455]      | -- | -- |
| <i>M. everetti</i>                  | Unknown | Pair | Australia | --         | -- | -- |
| <i>M. loricatus</i>                 | Unknown | Pair | Australia | [446]      | -- | -- |
| <i>M. boanensis</i>                 | Unknown | Pair | Australia | [455]      | -- | -- |
| <i>M. leucurus</i>                  | Unknown | Pair | Australia | --         | -- | -- |
| <i>M. julianae</i>                  | Unknown | Pair | Australia | --         | -- | -- |
| <i>M. manadensis</i>                | Unknown | Pair | Australia | [434]      | -- | -- |
| <i>M. brehmii</i>                   | Unknown | Pair | Australia | [455]      | -- | -- |
| <i>M. infelix</i>                   | Unknown | Pair | Australia | [434]      | -- | -- |
| <i>M. menckei</i>                   | Unknown | Pair | Australia | --         | -- | -- |
| <i>M. verticalis</i>                | Unknown | Pair | Australia | --         | -- | -- |
| <i>M. barbatus</i>                  | Unknown | Pair | Australia | --         | -- | -- |
| <i>M. browni</i>                    | Unknown | Pair | Australia | [445]      | -- | -- |
| <i>M. viduus</i>                    | Unknown | Pair | Australia | no source  | -- | -- |
| <i>M. godeffroyi</i>                | Unknown | Pair | Australia | [445]      | -- | -- |
| <i>M. takatsukasae</i>              | Unknown | Pair | Australia | [555]      | -- | -- |
| <i>M. chrysomela</i>                | Pair    | Pair | Australia | [434]      | -- | -- |
| <i>Arses telescopthalmus</i>        | Pair    | Pair | Australia | [434, 542] | -- | -- |
| <i>A. insularis</i>                 | Unknown | Pair | Australia | [434]      | -- | -- |
| <i>A. kaupi</i>                     | Pair    | Pair | Australia | [542]      | -- | -- |
| <i>Myiagra freycineti</i>           | Unknown | Pair | Australia | no source  | -- | -- |
| <i>M. erythrops</i>                 | Unknown | Pair | Australia | --         | -- | -- |
| <i>M. oceanica</i>                  | Unknown | Pair | Australia | --         | -- | -- |
| <i>M. pluto</i>                     | Unknown | Pair | Australia | --         | -- | -- |
| <i>M. atra</i>                      | Unknown | Pair | Australia | [445]      | -- | -- |
| <i>M. galeata</i>                   | Unknown | Pair | Australia | [446]      | -- | -- |
| <i>M. rubecula</i>                  | Pair    | Pair | Australia | [542]      | -- | -- |
| <i>M. ferrocyanea</i>               | Unknown | Pair | Australia | [434]      | -- | -- |
| <i>M. cervinicauda</i>              | Unknown | Pair | Australia | no source  | -- | -- |
| <i>M. caledonica</i>                | Pair    | Pair | Australia | [447]      | -- | -- |
| <i>M. vanikorensis</i>              | Unknown | Pair | Australia | [450]      | -- | -- |
| <i>M. albiventris</i>               | Unknown | Pair | Australia | --         | -- | -- |
| <i>M. azureocapilla</i>             | Unknown | Pair | Australia | --         | -- | -- |
| <i>M. ruficollis</i>                | Pair    | Pair | Australia | [542]      | -- | -- |
| <i>M. cyanoleuca</i>                | Pair    | Pair | Australia | --         | -- | -- |
| <i>M. inquieta</i>                  | Pair    | Pair | Australia | --         | -- | -- |
| <i>M. alecto</i>                    | Pair    | Pair | Australia | --         | -- | -- |
| <i>M. hebetior</i>                  | Unknown | Pair | Australia | [446]      | -- | -- |
| <i>Lamprolia victoriae</i>          | Pair    | Pair | Australia | [450, 556] | -- | -- |
| <i>Machaerirhynchus flaviventer</i> | Pair    | Pair | Australia | [542]      | -- | -- |
| <i>M. nigripectus</i>               | Unknown | Pair | Australia | [434]      | -- | -- |

|                                |             |             |             |                 |                       |       |    |       |
|--------------------------------|-------------|-------------|-------------|-----------------|-----------------------|-------|----|-------|
| <i>Grallina cyanoleuca</i>     | Occasional  | Pair        | Australia   | [557]           | --                    | --    |    |       |
| <i>G. bruijni</i>              | Unknown     | Pair        | Australia   | [434]           | --                    | --    |    |       |
| <b>Corvoidea: Laniidae</b>     |             |             |             |                 |                       |       |    |       |
| <i>Lanius tigrinus</i>         | Pair        | Pair        | Palearctic  | [512, 522, 558] | bbdbbbbbbabbdbbbbbbba | [433] |    |       |
| <i>L. bucephalus</i>           | Pair        | Pair        | Palearctic  | --              | --                    | --    |    |       |
| <i>L. collurio</i>             | Occasional  | Pair        | Palearctic  | [511]           | --                    | --    |    |       |
| <i>L. isabellinus</i>          | Pair        | Pair        | Palearctic  | [512, 522, 558] | --                    | --    |    |       |
| <i>L. cristatus</i>            | Pair        | Pair        | Palearctic  | --              | --                    | --    |    |       |
| <i>L. colluriooides</i>        | Pair        | Pair        | Palearctic  | --              | --                    | --    |    |       |
| <i>L. gubernator</i>           | Unknown     | Pair        | Africa      | --              | --                    | --    |    |       |
| <i>L. souzae</i>               | Unknown     | Pair        | Africa      | --              | --                    | --    |    |       |
| <i>L. vittatus</i>             | Pair        | Pair        | Indomalayan | --              | --                    | --    |    |       |
| <i>L. schach</i>               | Pair        | Pair        | Palearctic  | --              | --                    | --    |    |       |
| <i>L. tephronotus</i>          | Pair        | Pair        | Palearctic  | --              | --                    | --    |    |       |
| <i>L. validirostris</i>        | Unknown     | Pair        | Indomalayan | --              | --                    | --    |    |       |
| <i>L. minor</i>                | Pair        | Pair        | Palearctic  | --              | --                    | --    |    |       |
| <i>L. ludovicianus</i>         | Pair        | Pair        | Nearctic    | --              | --                    | --    |    |       |
| <i>L. excubitor</i>            | Pair        | Pair        | Palearctic  | --              | --                    | --    |    |       |
| <i>L. sphenocercus</i>         | Pair        | Pair        | Palearctic  | --              | --                    | --    |    |       |
| <i>L. excubitoroides</i>       | Cooperation | Cooperation | Africa      | --              | --                    | --    |    |       |
| <i>L. cabanisi</i>             | Cooperation | Cooperation | Africa      | --              | --                    | --    |    |       |
| <i>L. dorsalis</i>             | Unknown     | Pair        | Africa      | --              | --                    | --    |    |       |
| <i>L. somalicus</i>            | Unknown     | Pair        | Africa      | --              | --                    | --    |    |       |
| <i>L. mackinnoni</i>           | Unknown     | Pair        | Africa      | --              | --                    | --    |    |       |
| <i>L. collaris</i>             | Pair        | Pair        | Africa      | --              | --                    | --    |    |       |
| <i>L. newtoni</i>              | Unknown     | Pair        | Africa      | --              | --                    | --    |    |       |
| <i>L. marwizi</i>              | Unknown     | Pair        | Africa      | --              | --                    | --    |    |       |
| <i>L. senator</i>              | Pair        | Pair        | Palearctic  | --              | --                    | --    |    |       |
| <i>L. nubicus</i>              | Pair        | Pair        | Palearctic  | --              | --                    | --    |    |       |
| <i>Corvinella corvina</i>      | Cooperation | Cooperation | Africa      | --              | --                    | --    |    |       |
| <i>C. melanoleuca</i>          | Cooperation | Cooperation | Africa      | --              | --                    | --    |    |       |
| <i>Eurocephalus rueppelli</i>  | Cooperation | Cooperation | Africa      | --              | --                    | --    |    |       |
| <i>E. anguimans</i>            | Cooperation | Cooperation | Africa      | --              | --                    | --    |    |       |
| <b>Corvoidea: Corvidae</b>     |             |             |             |                 |                       |       |    |       |
| <i>Platysmurus leucopterus</i> | Pair        | Pair        | Indomalayan | [559]           | bbdbbbbbbabbdbbbbbbba | [433] | a  | [560] |
| <i>Dendrocitta vagabunda</i>   | Pair        | Pair        | Indomalayan | --              | --                    | --    | -- | --    |
| <i>D. formosae</i>             | Pair        | Pair        | Indomalayan | --              | --                    | --    | -- | --    |
| <i>D. occipitalis</i>          | Unknown     | Pair        | Indomalayan | --              | --                    | --    | -- | --    |
| <i>D. leucogastra</i>          | Pair        | Pair        | Indomalayan | --              | --                    | --    | -- | --    |
| <i>D. frontalis</i>            | Pair        | Pair        | Indomalayan | --              | --                    | --    | -- | --    |
| <i>D. bayleyi</i>              | Pair        | Pair        | Indomalayan | --              | --                    | --    | -- | --    |
| <i>Crypsirina temia</i>        | Pair        | Pair        | Indomalayan | --              | --                    | --    | -- | --    |
| <i>C. cucullata</i>            | Unknown     | Pair        | Indomalayan | --              | --                    | --    | -- | --    |



|                                  |             |             |             |            |    |    |     |    |
|----------------------------------|-------------|-------------|-------------|------------|----|----|-----|----|
| <i>Temnurus temnurus</i>         | Unknown     | Pair        | Indomalayan | --         | -- | -- | --  | -- |
| <i>Pyrrhocorax pyrrhocorax</i>   | Pair        | Pair        | Palaearctic | --         | -- | -- | --  | -- |
| <i>P. graculus</i>               | Pair        | Pair        | Palaearctic | --         | -- | -- | --  | -- |
| <i>Urocissa ornata</i>           | Unknown     | Cooperation | Indomalayan | [455]      | -- | -- | ba  | -- |
| <i>U. caerulea</i>               | Cooperation | Cooperation | Palaearctic | [561]      | -- | -- | --  | -- |
| <i>U. flavirostris</i>           | Unknown     | Cooperation | Indomalayan | [559]      | -- | -- | --  | -- |
| <i>U. erythrorhyncha</i>         | Unknown     | Cooperation | Indomalayan | --         | -- | -- | --  | -- |
| <i>U. whiteheadi</i>             | Unknown     | Cooperation | Indomalayan | --         | -- | -- | --  | -- |
| <i>Cissa chinensis</i>           | Pair        | Pair        | Indomalayan | --         | -- | -- | --  | -- |
| <i>C. hypoleuca</i>              | Unknown     | Pair        | Indomalayan | --         | -- | -- | --  | -- |
| <i>C. thalassina</i>             | Unknown     | Pair        | Indomalayan | --         | -- | -- | --  | -- |
| <i>Gymnorhinus cyanocephalus</i> | Cooperation | Cooperation | Nearctic    | --         | -- | -- | bba | -- |
| <i>Cyanocitta cristata</i>       | Occasional  | Pair        | Nearctic    | [562]      | -- | -- | --  | -- |
| <i>C. stelleri</i>               | Pair        | Pair        | Nearctic    | [559]      | -- | -- | --  | -- |
| <i>Aphelocoma insularis</i>      | Pair        | Pair        | Nearctic    | [563]      | -- | -- | --  | -- |
| <i>A. californica</i>            | Cooperation | Cooperation | Nearctic    | [564]      | -- | -- | --  | -- |
| <i>A. coerulescens</i>           | Cooperation | Cooperation | Nearctic    | [565]      | -- | -- | --  | -- |
| <i>A. ultramarina</i>            | Cooperation | Cooperation | Neotropical | [559]      | -- | -- | --  | -- |
| <i>A. unicolor</i>               | Cooperation | Cooperation | Neotropical | [566]      | -- | -- | --  | -- |
| <i>Cyanolyca armillata</i>       | Unknown     | Cooperation | Neotropical | [79, 559]  | -- | -- | --  | -- |
| <i>C. turcosa</i>                | Unknown     | Cooperation | Neotropical | [559]      | -- | -- | --  | -- |
| <i>C. viridicyana</i>            | Unknown     | Cooperation | Neotropical | --         | -- | -- | --  | -- |
| <i>C. cucullata</i>              | Unknown     | Cooperation | Neotropical | --         | -- | -- | --  | -- |
| <i>C. pulchra</i>                | Unknown     | Cooperation | Neotropical | --         | -- | -- | --  | -- |
| <i>C. pumilo</i>                 | Unknown     | Cooperation | Neotropical | --         | -- | -- | --  | -- |
| <i>C. nana</i>                   | Pair        | Pair        | Neotropical | --         | -- | -- | --  | -- |
| <i>C. mirabilis</i>              | Unknown     | Cooperation | Neotropical | --         | -- | -- | --  | -- |
| <i>C. argentigula</i>            | Cooperation | Cooperation | Neotropical | [559, 567] | -- | -- | --  | -- |
| <i>Cyanocorax melanocyaneus</i>  | Cooperation | Cooperation | Neotropical | [559]      | -- | -- | --  | -- |
| <i>C. sanblasianus</i>           | Cooperation | Cooperation | Neotropical | --         | -- | -- | --  | -- |
| <i>C. yucatanicus</i>            | Cooperation | Cooperation | Neotropical | --         | -- | -- | --  | -- |
| <i>C. beecheii</i>               | Cooperation | Cooperation | Neotropical | --         | -- | -- | --  | -- |
| <i>C. cyanomelas</i>             | Unknown     | Cooperation | Neotropical | --         | -- | -- | --  | -- |
| <i>C. caeruleus</i>              | Cooperation | Cooperation | Neotropical | [568]      | -- | -- | --  | -- |
| <i>C. violaceus</i>              | Cooperation | Cooperation | Neotropical | [559]      | -- | -- | --  | -- |
| <i>C. cristatellus</i>           | Cooperation | Cooperation | Neotropical | [568]      | -- | -- | --  | -- |
| <i>C. heilprini</i>              | Unknown     | Cooperation | Neotropical | [559]      | -- | -- | --  | -- |
| <i>C. cayanus</i>                | Cooperation | Cooperation | Neotropical | [569]      | -- | -- | --  | -- |
| <i>C. affinis</i>                | Cooperation | Cooperation | Neotropical | [79, 559]  | -- | -- | --  | -- |
| <i>C. dickeyi</i>                | Cooperation | Cooperation | Neotropical | [559]      | -- | -- | --  | -- |
| <i>C. chrysops</i>               | Cooperation | Cooperation | Neotropical | [568]      | -- | -- | --  | -- |
| <i>C. cyanopogon</i>             | Unknown     | Cooperation | Neotropical | [559]      | -- | -- | --  | -- |
| <i>C. mystacalis</i>             | Unknown     | Cooperation | Neotropical | --         | -- | -- | --  | -- |

|                                   |             |             |             |            |    |    |     |    |
|-----------------------------------|-------------|-------------|-------------|------------|----|----|-----|----|
| <i>C. yncas</i>                   | Cooperation | Cooperation | Neotropical | [570]      | -- | -- | --  | -- |
| <i>Psilorhinus morio</i>          | Cooperation | Cooperation | Neotropical | [559]      | -- | -- | --  | -- |
| <i>Calocitta colliei</i>          | Cooperation | Cooperation | Neotropical | --         | -- | -- | --  | -- |
| <i>C. formosa</i>                 | Cooperation | Cooperation | Neotropical | [571]      | -- | -- | --  | -- |
| <i>Garrulus glandarius</i>        | Pair        | Pair        | Palaearctic | [559]      | -- | -- | bbb | -- |
| <i>G. lanceolatus</i>             | Pair        | Pair        | Palaearctic | --         | -- | -- | --  | -- |
| <i>G. lidthi</i>                  | Cooperation | Cooperation | Palaearctic | [455, 572] | -- | -- | --  | -- |
| <i>Perisoreus infaustus</i>       | Group       | Pair        | Palaearctic | [573]      | -- | -- | --  | -- |
| <i>P. internigrans</i>            | Cooperation | Cooperation | Palaearctic | [574]      | -- | -- | --  | -- |
| <i>P. canadensis</i>              | Group       | Pair        | Nearctic    | [575]      | -- | -- | --  | -- |
| <i>Cyanopica cyana</i>            | Cooperation | Cooperation | Palaearctic | [559]      | -- | -- | --  | -- |
| <i>Pica pica</i>                  | Pair        | Pair        | Holarctic   | --         | -- | -- | --  | -- |
| <i>P. nuttalli</i>                | Pair        | Pair        | Nearctic    | [576]      | -- | -- | --  | -- |
| <i>Zavattariornis stresemanni</i> | Cooperation | Cooperation | Africa      | [512]      | -- | -- | --  | -- |
| <i>Podoces hendersoni</i>         | Unknown     | Pair        | Palaearctic | [559]      | -- | -- | --  | -- |
| <i>P. biddulphi</i>               | Unknown     | Pair        | Palaearctic | --         | -- | -- | --  | -- |
| <i>P. panderi</i>                 | Pair        | Pair        | Palaearctic | --         | -- | -- | --  | -- |
| <i>P. pleskei</i>                 | Unknown     | Pair        | Palaearctic | --         | -- | -- | --  | -- |
| <i>Nucifraga columbiana</i>       | Pair        | Pair        | Nearctic    | --         | -- | -- | --  | -- |
| <i>N. caryocatactes</i>           | Pair        | Pair        | Palaearctic | --         | -- | -- | --  | -- |
| <i>Ptilostomus afer</i>           | Cooperation | Cooperation | Africa      | [512, 577] | -- | -- | --  | -- |
| <i>Corvus monedula</i>            | Pair        | Pair        | Palaearctic | [559]      | -- | -- | --  | -- |
| <i>C. dauuricus</i>               | Pair        | Pair        | Palaearctic | --         | -- | -- | --  | -- |
| <i>C. splendens</i>               | Pair        | Pair        | Indomalayan | --         | -- | -- | --  | -- |
| <i>C. moneduloides</i>            | Unknown     | Pair        | Australia   | [559, 578] | -- | -- | --  | -- |
| <i>C. enca</i>                    | Unknown     | Pair        | Indomalayan | [559]      | -- | -- | --  | -- |
| <i>C. typicus</i>                 | Unknown     | Pair        | Indomalayan | --         | -- | -- | --  | -- |
| <i>C. unicolor</i>                | Unknown     | Pair        | Indomalayan | --         | -- | -- | --  | -- |
| <i>C. florensis</i>               | Unknown     | Pair        | Indomalayan | --         | -- | -- | --  | -- |
| <i>C. kubaryi</i>                 | Pair        | Pair        | Indomalayan | --         | -- | -- | --  | -- |
| <i>C. validus</i>                 | Unknown     | Pair        | Indomalayan | --         | -- | -- | --  | -- |
| <i>C. meeki</i>                   | Unknown     | Pair        | Australia   | --         | -- | -- | --  | -- |
| <i>C. woodfordi</i>               | Unknown     | Pair        | Australia   | --         | -- | -- | --  | -- |
| <i>C. fuscicapillus</i>           | Unknown     | Pair        | Australia   | --         | -- | -- | --  | -- |
| <i>C. tristis</i>                 | Unknown     | Pair        | Australia   | --         | -- | -- | --  | -- |
| <i>C. capensis</i>                | Pair        | Pair        | Africa      | --         | -- | -- | --  | -- |
| <i>C. frugilegus</i>              | Pair        | Pair        | Palaearctic | --         | -- | -- | --  | -- |
| <i>C. caurinus</i>                | Cooperation | Cooperation | Nearctic    | [579]      | -- | -- | --  | -- |
| <i>C. brachyrhynchus</i>          | Cooperation | Cooperation | Nearctic    | [580]      | -- | -- | --  | -- |
| <i>C. ossifragus</i>              | Cooperation | Cooperation | Nearctic    | [581]      | -- | -- | --  | -- |
| <i>C. imparatus</i>               | Unknown     | Pair        | Neotropical | [559]      | -- | -- | --  | -- |
| <i>C. sinaloae</i>                | Unknown     | Pair        | Neotropical | --         | -- | -- | --  | -- |
| <i>C. palmarum</i>                | Pair        | Pair        | Neotropical | --         | -- | -- | --  | -- |

|                          |             |             |             |       |    |    |    |    |
|--------------------------|-------------|-------------|-------------|-------|----|----|----|----|
| <i>C. jamaicensis</i>    | Unknown     | Pair        | Neotropical | --    | -- | -- | -- | -- |
| <i>C. nasicus</i>        | Unknown     | Pair        | Neotropical | --    | -- | -- | -- | -- |
| <i>C. leucognaphalus</i> | Unknown     | Pair        | Neotropical | --    | -- | -- | -- | -- |
| <i>C. corone</i>         | Cooperation | Cooperation | Palaearctic | [582] | -- | -- | -- | -- |
| <i>C. macrorhynchus</i>  | Pair        | Pair        | Africa      | [559] | -- | -- | -- | -- |
| <i>C. levaillantii</i>   | Pair        | Pair        | Indomalayan | --    | -- | -- | -- | -- |
| <i>C. orru</i>           | Pair        | Pair        | Australia   | --    | -- | -- | -- | -- |
| <i>C. bennetti</i>       | Pair        | Pair        | Australia   | --    | -- | -- | -- | -- |
| <i>C. coronoides</i>     | Pair        | Pair        | Australia   | --    | -- | -- | -- | -- |
| <i>C. mellori</i>        | Pair        | Pair        | Australia   | --    | -- | -- | -- | -- |
| <i>C. boreus</i>         | Pair        | Pair        | Australia   | --    | -- | -- | -- | -- |
| <i>C. tasmanicus</i>     | Pair        | Pair        | Australia   | --    | -- | -- | -- | -- |
| <i>C. torquatus</i>      | Pair        | Pair        | Palaearctic | --    | -- | -- | -- | -- |
| <i>C. hawaiiensis</i>    | Suspected   | Cooperation | Nearctic    | [583] | -- | -- | -- | -- |
| <i>C. cryptoleucus</i>   | Pair        | Pair        | Neotropical | [559] | -- | -- | -- | -- |
| <i>C. albus</i>          | Pair        | Pair        | Africa      | --    | -- | -- | -- | -- |
| <i>C. ruficollis</i>     | Pair        | Pair        | Palaearctic | --    | -- | -- | -- | -- |
| <i>C. corax</i>          | Pair        | Pair        | Palaearctic | --    | -- | -- | -- | -- |
| <i>C. rhipidurus</i>     | Pair        | Pair        | Palaearctic | --    | -- | -- | -- | -- |
| <i>C. albicollis</i>     | Pair        | Pair        | Africa      | --    | -- | -- | -- | -- |
| <i>C. crassirostris</i>  | Pair        | Pair        | Africa      | --    | -- | -- | -- | -- |

**Corvoidea: incertae sedis**

|                                  |             |             |             |            |             |    |    |       |
|----------------------------------|-------------|-------------|-------------|------------|-------------|----|----|-------|
| <i>Cinclosoma punctatum</i>      | Pair        | Pair        | Australia   | [459]      | bbdbbbbbbac | 0  | a  | [433] |
| <i>C. castanotus</i>             | Suspected   | Cooperation | Australia   | --         | --          | -- | -- | --    |
| <i>C. castaneothorax</i>         | Suspected   | Cooperation | Australia   | --         | --          | -- | -- | --    |
| <i>C. cinnamomeum</i>            | Suspected   | Cooperation | Australia   | --         | --          | -- | -- | --    |
| <i>C. ajax</i>                   | Unknown     | Pair        | Australia   | [434]      | --          | -- | -- | --    |
| <i>Melampitta lugubris</i>       | Pair        | Pair        | Australia   | [584]      | --          | -- | b  | --    |
| <i>M. gigantea</i>               | Unknown     | Pair        | Australia   | [434]      | --          | -- | -- | --    |
| <i>Mohoua albicilla</i>          | Cooperation | Cooperation | Australia   | [459]      | --          | -- | c  | --    |
| <i>M. ochrocephala</i>           | Cooperation | Cooperation | Australia   | --         | --          | -- | -- | --    |
| <i>M. novaeseelandiae</i>        | Cooperation | Cooperation | Australia   | --         | --          | -- | -- | --    |
| <i>Mystacornis crossleyi</i>     | Pair        | Pair        | Africa      | [525]      | --          | -- | d  | [585] |
| <i>Oreoica gutturalis</i>        | Pair        | Pair        | Australia   | [459]      | --          | -- | e  | [433] |
| <i>Pitohui kirhocephalus</i>     | Unknown     | Cooperation | Australia   | [434]      | --          | -- | f  | --    |
| <i>P. dichrous</i>               | Cooperation | Cooperation | Australia   | [586]      | --          | -- | -- | --    |
| <i>P. incertus</i>               | Unknown     | Cooperation | Australia   | [434]      | --          | -- | -- | --    |
| <i>P. ferrugineus</i>            | Suspected   | Cooperation | Australia   | [587]      | --          | -- | -- | --    |
| <i>P. cristatus</i>              | Unknown     | Cooperation | Australia   | [434]      | --          | -- | -- | --    |
| <i>P. nigrescens</i>             | Unknown     | Cooperation | Australia   | --         | --          | -- | -- | --    |
| <i>Platylophus galericulatus</i> | Unknown     | Pair        | Indomalayan | [559, 588] | --          | -- | g  | [560] |
| <i>Pteruthius rufiventer</i>     | Unknown     | Pair        | Palaearctic | [513]      | --          | -- | h  | [589] |
| <i>P. flaviscapis</i>            | Pair        | Pair        | Palaearctic | --         | --          | -- | -- | --    |

|                                     |             |             |             |            |             |            |    |    |
|-------------------------------------|-------------|-------------|-------------|------------|-------------|------------|----|----|
| <i>P. xanthochlorus</i>             | Unknown     | Pair        | Palaearctic | --         | --          | --         | -- | -- |
| <i>P. melanotis</i>                 | Pair        | Pair        | Indomalayan | --         | --          | --         | -- | -- |
| <i>P. aenobarbus</i>                | Unknown     | Pair        | Palaearctic | --         | --          | --         | -- | -- |
| <b>Picathartidae: Picathartidae</b> |             |             |             |            |             |            |    |    |
| <i>Chaetops frenatus</i>            | Cooperation | Cooperation | Africa      | [590]      | bbdbbbbbbba | [433, 591] |    |    |
| <i>C. aurantius</i>                 | Subspp      | Subspp      | Africa      | [512]      | --          | --         |    |    |
| <i>Picathartes gymnocephalus</i>    | Pair        | Pair        | Africa      | [592-594]  | --          | --         |    |    |
| <i>P. oreas</i>                     | Unknown     | Pair        | Africa      | [595]      | --          | --         |    |    |
| <b>Petroicidae: Petroicidae</b>     |             |             |             |            |             |            |    |    |
| <i>Amalocichla sclateriana</i>      | Unknown     | Pair        | Australia   | [434]      | bbdbbbbbbba | [433]      |    |    |
| <i>A. incerta</i>                   | Unknown     | Pair        | Australia   | --         | --          | --         |    |    |
| <i>Monachella muelleriana</i>       | Unknown     | Cooperation | Australia   | --         | --          | --         |    |    |
| <i>Microeca fascians</i>            | Cooperation | Cooperation | Australia   | [459]      | --          | --         |    |    |
| <i>M. hemixantha</i>                | Unknown     | Pair        | Australia   | [445]      | --          | --         |    |    |
| <i>M. flavigaster</i>               | Suspected   | Cooperation | Australia   | [459]      | --          | --         |    |    |
| <i>M. griseiceps</i>                | Unknown     | Pair        | Australia   | --         | --          | --         |    |    |
| <i>M. flavovirescens</i>            | Pair        | Pair        | Australia   | [434]      | --          | --         |    |    |
| <i>M. papuana</i>                   | Unknown     | Pair        | Australia   | --         | --          | --         |    |    |
| <i>Eugerygone rubra</i>             | Unknown     | Pair        | Australia   | --         | --          | --         |    |    |
| <i>Petroica bivittata</i>           | Unknown     | Pair        | Australia   | --         | --          | --         |    |    |
| <i>P. archboldi</i>                 | Unknown     | Pair        | Australia   | [455]      | --          | --         |    |    |
| <i>P. multicolor</i>                | Pair        | Pair        | Australia   | [459]      | --          | --         |    |    |
| <i>P. macrocephala</i>              | Pair        | Pair        | Australia   | --         | --          | --         |    |    |
| <i>P. goodenovii</i>                | Pair        | Pair        | Australia   | --         | --          | --         |    |    |
| <i>P. phoenicea</i>                 | Occasional  | Pair        | Australia   | --         | --          | --         |    |    |
| <i>P. rosea</i>                     | Pair        | Pair        | Australia   | --         | --          | --         |    |    |
| <i>P. rodinogaster</i>              | Pair        | Pair        | Australia   | --         | --          | --         |    |    |
| <i>P. australis</i>                 | Pair        | Pair        | Australia   | --         | --          | --         |    |    |
| <i>P. traversi</i>                  | Pair        | Pair        | Australia   | --         | --          | --         |    |    |
| <i>Melanodryas cucullata</i>        | Cooperation | Cooperation | Australia   | --         | --          | --         |    |    |
| <i>M. vittata</i>                   | Cooperation | Cooperation | Australia   | --         | --          | --         |    |    |
| <i>Tregellasia leucops</i>          | Unknown     | Cooperation | Australia   | --         | --          | --         |    |    |
| <i>T. capito</i>                    | Cooperation | Cooperation | Australia   | --         | --          | --         |    |    |
| <i>Eopsaltria australis</i>         | Cooperation | Cooperation | Australia   | --         | --          | --         |    |    |
| <i>E. griseogularis</i>             | Cooperation | Cooperation | Australia   | --         | --          | --         |    |    |
| <i>E. flaviventris</i>              | Unknown     | Cooperation | Australia   | [447]      | --          | --         |    |    |
| <i>E. georgiana</i>                 | Cooperation | Cooperation | Australia   | [459, 596] | --          | --         |    |    |
| <i>E. pulverulenta</i>              | Unknown     | Cooperation | Australia   | [459]      | --          | --         |    |    |
| <i>Poecilodryas brachyura</i>       | Unknown     | Pair        | Australia   | [434]      | --          | --         |    |    |
| <i>P. hypoleuca</i>                 | Unknown     | Pair        | Australia   | --         | --          | --         |    |    |
| <i>P. superciliosa</i>              | Pair        | Pair        | Australia   | [459]      | --          | --         |    |    |
| <i>P. placens</i>                   | Unknown     | Pair        | Australia   | [434]      | --          | --         |    |    |
| <i>P. albonotata</i>                | Unknown     | Pair        | Australia   | --         | --          | --         |    |    |

|                                     |         |        |           |           |    |    |
|-------------------------------------|---------|--------|-----------|-----------|----|----|
| <i>Peneothello sigillatus</i>       | Unknown | Pair   | Australia | --        | -- | -- |
| <i>P. cryptoleucus</i>              | Unknown | Pair   | Australia | no source | -- | -- |
| <i>P. cyanus</i>                    | Unknown | Pair   | Australia | [434]     | -- | -- |
| <i>P. bimaculatus</i>               | Unknown | Pair   | Australia | --        | -- | -- |
| <i>Heteromyias albispecularis</i>   | Pair    | Pair   | Australia | [459]     | -- | -- |
| <i>H. cinereifrons</i>              | Subspp  | Subspp | Australia | [434]     | -- | -- |
| <i>Pachycephalopsis hattamensis</i> | Unknown | Pair   | Australia | --        | -- | -- |
| <i>P. poliosoma</i>                 | Unknown | Pair   | Australia | --        | -- | -- |
| <i>Drymodes superciliaris</i>       | Pair    | Pair   | Australia | [459]     | -- | -- |
| <i>D. brunneopygia</i>              | Unknown | Pair   | Australia | --        | -- | -- |

**Paridae group: Paridae: Parinae**

|                               |             |             |             |            |               |            |      |            |
|-------------------------------|-------------|-------------|-------------|------------|---------------|------------|------|------------|
| <i>Cyanistes caeruleus</i>    | Occasional  | Pair        | Palaearctic | [511]      | bbdbbbbbbbaaa | [433, 591] | aa   | [597]      |
| <i>C. cyanus</i>              | Pair        | Pair        | Palaearctic | --         | --            | --         | --   | --         |
| <i>Sylviparus modestus</i>    | Unknown     | Pair        | Palaearctic | [598]      | --            | --         | aba  | --         |
| <i>Melanochlora sultanea</i>  | Unknown     | Pair        | Indomalayan | --         | --            | --         | --   | --         |
| <i>Pseudopodoces humilis</i>  | Pair        | Pair        | Palaearctic | [559]      | --            | --         | abba | [597, 599] |
| <i>Parus guineensis</i>       | Unknown     | Cooperation | Africa      | [598]      | --            | --         | --   | [597]      |
| <i>P. leucomelas</i>          | Unknown     | Cooperation | Africa      | --         | --            | --         | --   | --         |
| <i>P. niger</i>               | Cooperation | Cooperation | Africa      | [512, 600] | --            | --         | --   | --         |
| <i>P. albiventris</i>         | Unknown     | Cooperation | Africa      | [512]      | --            | --         | --   | --         |
| <i>P. leuconotus</i>          | Unknown     | Cooperation | Africa      | --         | --            | --         | --   | --         |
| <i>P. funereus</i>            | Unknown     | Cooperation | Africa      | --         | --            | --         | --   | --         |
| <i>P. rufiventris</i>         | Suspected   | Cooperation | Africa      | --         | --            | --         | --   | --         |
| <i>P. pallidiventris</i>      | Subspp      | Subspp      | Africa      | --         | --            | --         | --   | --         |
| <i>P. fringillinus</i>        | Subspp      | Subspp      | Africa      | --         | --            | --         | --   | --         |
| <i>P. fasciiventer</i>        | Suspected   | Cooperation | Africa      | --         | --            | --         | --   | --         |
| <i>P. thruppi</i>             | Unknown     | Cooperation | Africa      | --         | --            | --         | --   | --         |
| <i>P. griseiventris</i>       | Subspp      | Subspp      | Africa      | --         | --            | --         | --   | --         |
| <i>P. cinerascens</i>         | Suspected   | Cooperation | Africa      | --         | --            | --         | --   | --         |
| <i>P. afer</i>                | Suspected   | Cooperation | Africa      | --         | --            | --         | --   | --         |
| <i>P. major</i>               | Pair        | Pair        | Palaearctic | [511]      | --            | --         | --   | --         |
| <i>P. bokharensis</i>         | Pair        | Pair        | Palaearctic | [598]      | --            | --         | --   | --         |
| <i>P. monticolus</i>          | Pair        | Pair        | Palaearctic | --         | --            | --         | --   | --         |
| <i>P. nuchalis</i>            | Pair        | Pair        | Palaearctic | --         | --            | --         | --   | --         |
| <i>P. xanthogenys</i>         | Pair        | Pair        | Indomalayan | --         | --            | --         | --   | --         |
| <i>P. spilonotus</i>          | Unknown     | Pair        | Indomalayan | --         | --            | --         | --   | --         |
| <i>P. holsti</i>              | Unknown     | Pair        | Palaearctic | --         | --            | --         | --   | --         |
| <i>P. flavipectus</i>         | Pair        | Pair        | Palaearctic | --         | --            | --         | --   | --         |
| <i>P. semilarvatus</i>        | Unknown     | Pair        | Indomalayan | --         | --            | --         | --   | --         |
| <i>Periparus rufonuchalis</i> | Pair        | Pair        | Palaearctic | --         | --            | --         | abba | --         |
| <i>P. rubidiventris</i>       | Pair        | Pair        | Palaearctic | --         | --            | --         | --   | --         |
| <i>P. melanolophus</i>        | Pair        | Pair        | Palaearctic | --         | --            | --         | --   | --         |
| <i>P. ater</i>                | Pair        | Pair        | Palaearctic | [511]      | --            | --         | --   | --         |

|                              |             |             |             |            |    |    |       |    |
|------------------------------|-------------|-------------|-------------|------------|----|----|-------|----|
| <i>P. venustus</i>           | Unknown     | Pair        | Palaearctic | [598]      | -- | -- | --    | -- |
| <i>P. elegans</i>            | Unknown     | Pair        | Indomalayan | --         | -- | -- | --    | -- |
| <i>P. amabilis</i>           | Unknown     | Pair        | Indomalayan | --         | -- | -- | --    | -- |
| <i>Lophophanes cristatus</i> | Pair        | Pair        | Palaearctic | [511]      | -- | -- | abbbb | -- |
| <i>L. dichrous</i>           | Pair        | Pair        | Palaearctic | [598]      | -- | -- | --    | -- |
| <i>Baeolophus wollweberi</i> | Cooperation | Cooperation | Neotropical | [601, 602] | -- | -- | --    | -- |
| <i>B. inornatus</i>          | Pair        | Pair        | Nearctic    | [603]      | -- | -- | --    | -- |
| <i>B. bicolor</i>            | Cooperation | Cooperation | Nearctic    | [604]      | -- | -- | --    | -- |
| <i>B. atricristatus</i>      | Pair        | Pair        | Nearctic    | [598]      | -- | -- | --    | -- |
| <i>Poecile varius</i>        | Pair        | Pair        | Palaearctic | --         | -- | -- | abbbc | -- |
| <i>P. palustris</i>          | Pair        | Pair        | Palaearctic | [511]      | -- | -- | --    | -- |
| <i>P. lugubris</i>           | Occasional  | Pair        | Palaearctic | --         | -- | -- | --    | -- |
| <i>P. montanus</i>           | Pair        | Pair        | Palaearctic | --         | -- | -- | --    | -- |
| <i>P. carolinensis</i>       | Occasional  | Pair        | Nearctic    | [605]      | -- | -- | --    | -- |
| <i>P. atricapillus</i>       | Pair        | Pair        | Nearctic    | [606]      | -- | -- | --    | -- |
| <i>P. gambeli</i>            | Pair        | Pair        | Nearctic    | [607]      | -- | -- | --    | -- |
| <i>P. sclateri</i>           | Unknown     | Pair        | Neotropical | [608]      | -- | -- | --    | -- |
| <i>P. superciliosus</i>      | Pair        | Pair        | Palaearctic | [598]      | -- | -- | --    | -- |
| <i>P. davidi</i>             | Unknown     | Pair        | Palaearctic | --         | -- | -- | --    | -- |
| <i>P. cinctus</i>            | Pair        | Pair        | Palaearctic | [511]      | -- | -- | --    | -- |
| <i>P. hudsonicus</i>         | Pair        | Pair        | Nearctic    | [609]      | -- | -- | --    | -- |
| <i>P. rufescens</i>          | Pair        | Pair        | Nearctic    | [610]      | -- | -- | --    | -- |

**Paridae group: Paridae: Remizinae**

|                                |             |             |             |       |               |            |    |     |
|--------------------------------|-------------|-------------|-------------|-------|---------------|------------|----|-----|
| <i>Remiz pendulinus</i>        | Female only | Female only | Palaearctic | [611] | bbdbbbbbbbaaa | [433, 591] | b  | [3] |
| <i>R. coronatus</i>            | Unknown     | Pair        | Palaearctic | [598] | --            | --         | -- | --  |
| <i>R. consobrinus</i>          | Pair        | Pair        | Palaearctic | --    | --            | --         | -- | --  |
| <i>Anthoscopus punctifrons</i> | Unknown     | Cooperation | Palaearctic | --    | --            | --         | -- | --  |
| <i>A. parvulus</i>             | Unknown     | Cooperation | Africa      | --    | --            | --         | -- | --  |
| <i>A. musculus</i>             | Unknown     | Cooperation | Africa      | --    | --            | --         | -- | --  |
| <i>A. flavifrons</i>           | Suspected   | Cooperation | Africa      | --    | --            | --         | -- | --  |
| <i>A. caroli</i>               | Suspected   | Cooperation | Africa      | [512] | --            | --         | -- | --  |
| <i>A. sylviella</i>            | Cooperation | Cooperation | Africa      | [598] | --            | --         | -- | --  |
| <i>A. minutus</i>              | Suspected   | Cooperation | Africa      | --    | --            | --         | -- | --  |
| <i>Cephalopyrus flammiceps</i> | Pair        | Pair        | Indomalayan | --    | --            | --         | -- | --  |

**Paridae group: Stenostiridae**

|                                   |             |             |        |       |               |            |  |  |
|-----------------------------------|-------------|-------------|--------|-------|---------------|------------|--|--|
| <i>Elminia longicauda</i>         | Cooperation | Cooperation | Africa | [524] | bbdbbbbbbbaab | [433, 591] |  |  |
| <i>E. albicauda</i>               | Unknown     | Cooperation | Africa | --    | --            | --         |  |  |
| <i>Trochocercus nigromitratus</i> | Pair        | Pair        | Africa | --    | --            | --         |  |  |
| <i>T. albiventris</i>             | Pair        | Pair        | Africa | --    | --            | --         |  |  |
| <i>T. albonotatus</i>             | Pair        | Pair        | Africa | --    | --            | --         |  |  |
| <i>Stenostira scita</i>           | Pair        | Pair        | Africa | --    | --            | --         |  |  |
| <i>Myioparus griseigularis</i>    | Pair        | Pair        | Africa | --    | --            | --         |  |  |
| <i>M. plumbeus</i>                | Pair        | Pair        | Africa | --    | --            | --         |  |  |

|                                    |             |             |             |                 |             |            |
|------------------------------------|-------------|-------------|-------------|-----------------|-------------|------------|
| <i>Culicicapa ceylonensis</i>      | Pair        | Pair        | Indomalayan | [467, 513]      | --          | --         |
| <i>C. helianthea</i>               | Unknown     | Pair        | Indomalayan | [468]           | --          | --         |
| <b>Alaudidae: Alaudidae</b>        |             |             |             |                 |             |            |
| <i>Mirafra passerina</i>           | Pair        | Pair        | Africa      | [503, 612]      | bbdbbbbbbba | [433, 613] |
| <i>M. cantillans</i>               | Pair        | Pair        | Widespread  | --              | --          | --         |
| <i>M. javanica</i>                 | Pair        | Pair        | Widespread  | [612]           | --          | --         |
| <i>M. cheniana</i>                 | Pair        | Pair        | Africa      | [503, 612]      | --          | --         |
| <i>M. albicauda</i>                | Pair        | Pair        | Africa      | --              | --          | --         |
| <i>M. hova</i>                     | Pair        | Pair        | Africa      | [612]           | --          | --         |
| <i>M. cordofanica</i>              | Unknown     | Pair        | Africa      | [503, 612]      | --          | --         |
| <i>M. williamsi</i>                | Unknown     | Pair        | Africa      | --              | --          | --         |
| <i>M. pulpa</i>                    | Unknown     | Pair        | Africa      | --              | --          | --         |
| <i>M. hypermetra</i>               | Pair        | Pair        | Africa      | --              | --          | --         |
| <i>M. somalica</i>                 | Unknown     | Pair        | Africa      | --              | --          | --         |
| <i>M. ashi</i>                     | Unknown     | Pair        | Africa      | --              | --          | --         |
| <i>M. africana</i>                 | Pair        | Pair        | Africa      | --              | --          | --         |
| <i>M. sharpii</i>                  | Subspp      | Subspp      | Africa      | --              | --          | --         |
| <i>M. angolensis</i>               | Pair        | Pair        | Africa      | --              | --          | --         |
| <i>M. rufocinnamomea</i>           | Pair        | Pair        | Africa      | --              | --          | --         |
| <i>M. apiata</i>                   | Pair        | Pair        | Africa      | --              | --          | --         |
| <i>M. collaris</i>                 | Unknown     | Pair        | Africa      | --              | --          | --         |
| <i>M. africanoides</i>             | Pair        | Pair        | Africa      | --              | --          | --         |
| <i>M. alopex</i>                   | Unknown     | Pair        | Africa      | --              | --          | --         |
| <i>M. erythroptera</i>             | Pair        | Pair        | Indomalayan | [612]           | --          | --         |
| <i>M. assamica</i>                 | Pair        | Pair        | Indomalayan | --              | --          | --         |
| <i>M. rufa</i>                     | Unknown     | Pair        | Africa      | [503, 612]      | --          | --         |
| <i>M. gilletti</i>                 | Pair        | Pair        | Africa      | --              | --          | --         |
| <i>M. poecilosterna</i>            | Pair        | Pair        | Africa      | --              | --          | --         |
| <i>M. degodiensis</i>              | Unknown     | Pair        | Africa      | --              | --          | --         |
| <i>M. naevia</i>                   | Subspp      | Subspp      | Africa      | --              | --          | --         |
| <i>M. sabota</i>                   | Pair        | Pair        | Africa      | --              | --          | --         |
| <i>Pinarocorys erythropterygia</i> | Unknown     | Pair        | Africa      | --              | --          | --         |
| <i>P. nigricans</i>                | Pair        | Pair        | Africa      | --              | --          | --         |
| <i>Heteromirafra archeri</i>       | Unknown     | Pair        | Africa      | --              | --          | --         |
| <i>H. sidamoensis</i>              | Unknown     | Pair        | Africa      | --              | --          | --         |
| <i>H. ruddi</i>                    | Pair        | Pair        | Africa      | --              | --          | --         |
| <i>Certhilauda curvirostris</i>    | Pair        | Pair        | Africa      | --              | --          | --         |
| <i>C. chuana</i>                   | Unknown     | Pair        | Africa      | --              | --          | --         |
| <i>C. erythrochlamys</i>           | Pair        | Pair        | Africa      | --              | --          | --         |
| <i>C. albescens</i>                | Pair        | Pair        | Africa      | --              | --          | --         |
| <i>C. burra</i>                    | Pair        | Pair        | Africa      | --              | --          | --         |
| <i>Chersomanes albobasciata</i>    | Cooperation | Cooperation | Africa      | [503, 612, 614] | --          | --         |
| <i>Eremopterix leucotis</i>        | Pair        | Pair        | Africa      | [503, 612]      | --          | --         |

|                                  |            |             |             |            |    |    |
|----------------------------------|------------|-------------|-------------|------------|----|----|
| <i>E. australis</i>              | Pair       | Pair        | Africa      | --         | -- | -- |
| <i>E. verticalis</i>             | Pair       | Pair        | Africa      | --         | -- | -- |
| <i>E. leucopareia</i>            | Pair       | Pair        | Africa      | --         | -- | -- |
| <i>E. signata</i>                | Unknown    | Pair        | Africa      | --         | -- | -- |
| <i>E. nigriceps</i>              | Pair       | Pair        | Africa      | --         | -- | -- |
| <i>E. grisea</i>                 | Pair       | Pair        | Indomalayan | [612]      | -- | -- |
| <i>Ammomanes cincturus</i>       | Pair       | Pair        | Widespread  | [503, 612] | -- | -- |
| <i>A. phoenicurus</i>            | Pair       | Pair        | Indomalayan | [612]      | -- | -- |
| <i>A. deserti</i>                | Unknown    | Pair        | Widespread  | [503]      | -- | -- |
| <i>A. grayi</i>                  | Suspected  | Cooperation | Africa      | [503, 612] | -- | -- |
| <i>Alaemon alaudipes</i>         | Pair       | Pair        | Africa      | --         | -- | -- |
| <i>A. hamertoni</i>              | Unknown    | Pair        | Africa      | --         | -- | -- |
| <i>Ramphocoris clotbey</i>       | Pair       | Pair        | Africa      | --         | -- | -- |
| <i>Melanocorypha calandra</i>    | Occasional | Pair        | Palaearctic | --         | -- | -- |
| <i>M. bimaculata</i>             | Pair       | Pair        | Palaearctic | [612, 615] | -- | -- |
| <i>M. maxima</i>                 | Pair       | Pair        | Palaearctic | [612]      | -- | -- |
| <i>M. mongolica</i>              | Pair       | Pair        | Palaearctic | --         | -- | -- |
| <i>M. leucoptera</i>             | Pair       | Pair        | Palaearctic | [612, 615] | -- | -- |
| <i>M. yeltoniensis</i>           | Pair       | Pair        | Palaearctic | --         | -- | -- |
| <i>Calandrella brachydactyla</i> | Pair       | Pair        | Palaearctic | --         | -- | -- |
| <i>C. blanfordi</i>              | Unknown    | Pair        | Africa      | [503, 612] | -- | -- |
| <i>C. erlangeri</i>              | Unknown    | Pair        | Africa      | --         | -- | -- |
| <i>C. cinerea</i>                | Pair       | Pair        | Africa      | --         | -- | -- |
| <i>C. acutirostris</i>           | Pair       | Pair        | Palaearctic | [612]      | -- | -- |
| <i>C. rufescens</i>              | Occasional | Pair        | Palaearctic | [612, 615] | -- | -- |
| <i>C. cheleensis</i>             | Subspp     | Subspp      | Palaearctic | --         | -- | -- |
| <i>C. raytal</i>                 | Pair       | Pair        | Palaearctic | [612]      | -- | -- |
| <i>C. somalica</i>               | Unknown    | Pair        | Africa      | [503, 612] | -- | -- |
| <i>C. athenis</i>                | Subspp     | Subspp      | Africa      | --         | -- | -- |
| <i>Spizocorys conirostris</i>    | Pair       | Pair        | Africa      | --         | -- | -- |
| <i>S. sclateri</i>               | Pair       | Pair        | Africa      | --         | -- | -- |
| <i>S. obbiensis</i>              | Unknown    | Pair        | Africa      | --         | -- | -- |
| <i>S. personata</i>              | Unknown    | Pair        | Africa      | --         | -- | -- |
| <i>S. fringillaris</i>           | Pair       | Pair        | Africa      | --         | -- | -- |
| <i>Eremalauda starki</i>         | Pair       | Pair        | Africa      | --         | -- | -- |
| <i>E. dunni</i>                  | Pair       | Pair        | Africa      | --         | -- | -- |
| <i>Chersophilus duponti</i>      | Pair       | Pair        | Palaearctic | --         | -- | -- |
| <i>Galerida cristata</i>         | Occasional | Pair        | Widespread  | [612, 615] | -- | -- |
| <i>G. theklae</i>                | Pair       | Pair        | Widespread  | [503, 612] | -- | -- |
| <i>G. malabarica</i>             | Pair       | Pair        | Indomalayan | [612]      | -- | -- |
| <i>G. deva</i>                   | Pair       | Pair        | Indomalayan | --         | -- | -- |
| <i>G. modesta</i>                | Unknown    | Pair        | Africa      | [503, 612] | -- | -- |
| <i>G. magnirostris</i>           | Pair       | Pair        | Africa      | --         | -- | -- |



|                                   |            |        |             |                 |               |            |     |       |
|-----------------------------------|------------|--------|-------------|-----------------|---------------|------------|-----|-------|
| <i>Pseudalaemon fremantlii</i>    | Unknown    | Pair   | Africa      | --              | --            | --         |     |       |
| <i>Lullula arborea</i>            | Pair       | Pair   | Palaearctic | [612, 615]      | --            | --         |     |       |
| <i>Alauda arvensis</i>            | Pair       | Pair   | Palaearctic | --              | --            | --         |     |       |
| <i>A. japonica</i>                | Subspp     | Subspp | Palaearctic | --              | --            | --         |     |       |
| <i>A. gulgula</i>                 | Pair       | Pair   | Palaearctic | --              | --            | --         |     |       |
| <i>A. razae</i>                   | Pair       | Pair   | Palaearctic | --              | --            | --         |     |       |
| <i>Eremophila alpestris</i>       | Occasional | Pair   | Holarctic   | [612, 616, 617] | --            | --         |     |       |
| <i>E. bilopha</i>                 | Pair       | Pair   | Palaearctic | [503, 612]      | --            | --         |     |       |
| <b>Sylvioidea: Hirundinidae</b>   |            |        |             |                 |               |            |     |       |
| <i>Pseudochelidon eurystomina</i> | Pair       | Pair   | Africa      | [618]           | bbdbbbbbbbaaa | [433, 613] | a   | [619] |
| <i>P. sirintarae</i>              | Unknown    | Pair   | Indomalayan | --              | --            | --         | --  | --    |
| <i>Cheramoeca leucosternus</i>    | Pair       | Pair   | Australia   | --              | --            | --         | baa | --    |
| <i>Pseudhirundo griseopyga</i>    | Pair       | Pair   | Africa      | --              | --            | --         | --  | --    |
| <i>Psalidoprocne nitens</i>       | Pair       | Pair   | Africa      | --              | --            | --         | --  | --    |
| <i>P. fuliginosa</i>              | Pair       | Pair   | Africa      | --              | --            | --         | --  | --    |
| <i>P. albiceps</i>                | Pair       | Pair   | Africa      | --              | --            | --         | --  | --    |
| <i>P. chalybea</i>                | Subspp     | Subspp | Africa      | --              | --            | --         | --  | --    |
| <i>P. petiti</i>                  | Subspp     | Subspp | Africa      | --              | --            | --         | --  | --    |
| <i>P. mangbettorum</i>            | Subspp     | Subspp | Africa      | --              | --            | --         | --  | --    |
| <i>P. oleaginea</i>               | Subspp     | Subspp | Africa      | --              | --            | --         | --  | --    |
| <i>P. pristoptera</i>             | Pair       | Pair   | Africa      | --              | --            | --         | --  | --    |
| <i>P. antinorii</i>               | Subspp     | Subspp | Africa      | --              | --            | --         | --  | --    |
| <i>P. orientalis</i>              | Subspp     | Subspp | Africa      | --              | --            | --         | --  | --    |
| <i>P. holomelas</i>               | Subspp     | Subspp | Africa      | --              | --            | --         | --  | --    |
| <i>P. obscura</i>                 | Pair       | Pair   | Africa      | --              | --            | --         | --  | --    |
| <i>Ptyonoprogne rupestris</i>     | Pair       | Pair   | Palaearctic | --              | --            | --         | bab | --    |
| <i>P. obsoleta</i>                | Subspp     | Subspp | Africa      | --              | --            | --         | --  | --    |
| <i>P. fuligula</i>                | Pair       | Pair   | Africa      | --              | --            | --         | --  | --    |
| <i>P. concolor</i>                | Pair       | Pair   | Indomalayan | --              | --            | --         | --  | --    |
| <i>Hirundo rustica</i>            | Occasional | Pair   | Holarctic   | --              | --            | --         | --  | --    |
| <i>H. lucida</i>                  | Unknown    | Pair   | Africa      | --              | --            | --         | --  | --    |
| <i>H. aethiopica</i>              | Pair       | Pair   | Africa      | --              | --            | --         | --  | --    |
| <i>H. angolensis</i>              | Pair       | Pair   | Africa      | --              | --            | --         | --  | --    |
| <i>H. albigularis</i>             | Pair       | Pair   | Africa      | --              | --            | --         | --  | --    |
| <i>H. domicola</i>                | Subspp     | Subspp | Indomalayan | --              | --            | --         | --  | --    |
| <i>H. tahitica</i>                | Pair       | Pair   | Indomalayan | --              | --            | --         | --  | --    |
| <i>H. neoxena</i>                 | Pair       | Pair   | Australia   | --              | --            | --         | --  | --    |
| <i>H. smithii</i>                 | Pair       | Pair   | Widespread  | --              | --            | --         | --  | --    |
| <i>H. nigrita</i>                 | Pair       | Pair   | Africa      | --              | --            | --         | --  | --    |
| <i>H. nigrorufa</i>               | Pair       | Pair   | Africa      | --              | --            | --         | --  | --    |
| <i>H. atrocaerulea</i>            | Occasional | Pair   | Africa      | [618, 620]      | --            | --         | --  | --    |
| <i>H. leucosoma</i>               | Pair       | Pair   | Africa      | [618]           | --            | --         | --  | --    |
| <i>H. megaensis</i>               | Unknown    | Pair   | Africa      | --              | --            | --         | --  | --    |

|                                 |            |        |             |            |    |    |    |    |
|---------------------------------|------------|--------|-------------|------------|----|----|----|----|
| <i>H. dimidiata</i>             | Pair       | Pair   | Africa      | --         | -- | -- | -- | -- |
| <i>Cecropis cucullata</i>       | Pair       | Pair   | Africa      | --         | -- | -- | -- | -- |
| <i>C. abyssinica</i>            | Pair       | Pair   | Africa      | --         | -- | -- | -- | -- |
| <i>C. semirufa</i>              | Pair       | Pair   | Africa      | --         | -- | -- | -- | -- |
| <i>C. senegalensis</i>          | Pair       | Pair   | Africa      | --         | -- | -- | -- | -- |
| <i>C. daurica</i>               | Pair       | Pair   | Palaearctic | --         | -- | -- | -- | -- |
| <i>C. domicella</i>             | Subspp     | Subspp | Africa      | --         | -- | -- | -- | -- |
| <i>C. striolata</i>             | Pair       | Pair   | Indomalayan | --         | -- | -- | -- | -- |
| <i>Petrochelidon perdita</i>    | Unknown    | Pair   | Africa      | --         | -- | -- | -- | -- |
| <i>P. preussi</i>               | Pair       | Pair   | Africa      | --         | -- | -- | -- | -- |
| <i>P. rufigula</i>              | Pair       | Pair   | Africa      | --         | -- | -- | -- | -- |
| <i>P. spilodera</i>             | Pair       | Pair   | Africa      | --         | -- | -- | -- | -- |
| <i>Haplochelidon andecola</i>   | Pair       | Pair   | Neotropical | --         | -- | -- | -- | -- |
| <i>Petrochelidon pyrrhonota</i> | Pair       | Pair   | Neotropical | [618, 621] | -- | -- | -- | -- |
| <i>P. fulva</i>                 | Pair       | Pair   | Nearctic    | [618, 622] | -- | -- | -- | -- |
| <i>P. rufocollaris</i>          | Unknown    | Pair   | Neotropical | [618]      | -- | -- | -- | -- |
| <i>P. nigricans</i>             | Pair       | Pair   | Australia   | --         | -- | -- | -- | -- |
| <i>P. fluvicola</i>             | Pair       | Pair   | Indomalayan | --         | -- | -- | -- | -- |
| <i>P. ariel</i>                 | Pair       | Pair   | Australia   | --         | -- | -- | -- | -- |
| <i>P. fuliginosa</i>            | Pair       | Pair   | Africa      | --         | -- | -- | -- | -- |
| <i>Delichon urbica</i>          | Pair       | Pair   | Palaearctic | [615, 618] | -- | -- | -- | -- |
| <i>D. dasypus</i>               | Pair       | Pair   | Palaearctic | [618]      | -- | -- | -- | -- |
| <i>D. nipalensis</i>            | Pair       | Pair   | Palaearctic | --         | -- | -- | -- | -- |
| <i>Tachycineta bicolor</i>      | Occasional | Pair   | Neotropical | [618, 623] | -- | -- | bb | -- |
| <i>T. albilinea</i>             | Pair       | Pair   | Neotropical | [618]      | -- | -- | -- | -- |
| <i>T. albiventer</i>            | Unknown    | Pair   | Neotropical | --         | -- | -- | -- | -- |
| <i>T. leucorrhoa</i>            | Pair       | Pair   | Neotropical | --         | -- | -- | -- | -- |
| <i>T. meyeni</i>                | Unknown    | Pair   | Neotropical | --         | -- | -- | -- | -- |
| <i>T. thalassina</i>            | Occasional | Pair   | Neotropical | [618, 624] | -- | -- | -- | -- |
| <i>T. cyaneoviridis</i>         | Pair       | Pair   | Neotropical | [618]      | -- | -- | -- | -- |
| <i>T. euchrysea</i>             | Unknown    | Pair   | Neotropical | --         | -- | -- | -- | -- |
| <i>Progne tapera</i>            | Occasional | Pair   | Neotropical | --         | -- | -- | -- | -- |
| <i>P. subis</i>                 | Pair       | Pair   | Nearctic    | [618, 625] | -- | -- | -- | -- |
| <i>P. cryptoleuca</i>           | Unknown    | Pair   | Neotropical | [618]      | -- | -- | -- | -- |
| <i>P. dominicensis</i>          | Pair       | Pair   | Neotropical | --         | -- | -- | -- | -- |
| <i>P. sinaloae</i>              | Unknown    | Pair   | Neotropical | --         | -- | -- | -- | -- |
| <i>P. chalybea</i>              | Pair       | Pair   | Neotropical | --         | -- | -- | -- | -- |
| <i>P. modesta</i>               | Unknown    | Pair   | Neotropical | --         | -- | -- | -- | -- |
| <i>Notiochelidon murina</i>     | Unknown    | Pair   | Neotropical | --         | -- | -- | -- | -- |
| <i>N. cyanoleuca</i>            | Pair       | Pair   | Neotropical | --         | -- | -- | -- | -- |
| <i>N. flavipes</i>              | Unknown    | Pair   | Neotropical | --         | -- | -- | -- | -- |
| <i>N. pileata</i>               | Pair       | Pair   | Neotropical | --         | -- | -- | -- | -- |
| <i>Atticora fasciata</i>        | Unknown    | Pair   | Neotropical | --         | -- | -- | -- | -- |

|                              |            |        |             |                 |    |    |    |    |
|------------------------------|------------|--------|-------------|-----------------|----|----|----|----|
| <i>A. melanoleuca</i>        | Pair       | Pair   | Neotropical | --              | -- | -- | -- | -- |
| <i>Neochelidon tibialis</i>  | Unknown    | Pair   | Neotropical | --              | -- | -- | -- | -- |
| <i>Stelgidopteryx fucata</i> | Pair       | Pair   | Neotropical | [618, 626]      | -- | -- | -- | -- |
| <i>S. serripennis</i>        | Occasional | Pair   | Nearctic    | [618, 627, 628] | -- | -- | -- | -- |
| <i>S. ridgwayi</i>           | Subspp     | Subspp | Neotropical | [618, 626]      | -- | -- | -- | -- |
| <i>S. ruficollis</i>         | Pair       | Pair   | Neotropical | [618]           | -- | -- | -- | -- |
| <i>Riparia riparia</i>       | Pair       | Pair   | Holarctic   | [618, 629]      | -- | -- | -- | -- |
| <i>R. paludicola</i>         | Pair       | Pair   | Widespread  | [615, 618, 626] | -- | -- | -- | -- |
| <i>R. congica</i>            | Unknown    | Pair   | Africa      | [618]           | -- | -- | -- | -- |
| <i>R. cincta</i>             | Pair       | Pair   | Africa      | --              | -- | -- | -- | -- |
| <i>Phedina borbonica</i>     | Pair       | Pair   | Africa      | --              | -- | -- | -- | -- |
| <i>P. brazzae</i>            | Unknown    | Pair   | Africa      | --              | -- | -- | -- | -- |

**Sylvioidea: Aegithalidae**

|                             |             |             |             |            |               |                 |
|-----------------------------|-------------|-------------|-------------|------------|---------------|-----------------|
| <i>Aegithalos caudatus</i>  | Cooperation | Cooperation | Palaearctic | [630, 631] | bbdbbbbbbabab | [433, 613]      |
| <i>A. leucogenys</i>        | Pair        | Pair        | Palaearctic | [598]      | --            | --              |
| <i>A. concinnus</i>         | Pair        | Pair        | Palaearctic | --         | --            | --              |
| <i>A. niveogularis</i>      | Unknown     | Pair        | Palaearctic | --         | --            | --              |
| <i>A. iouschistos</i>       | Pair        | Pair        | Palaearctic | --         | --            | --              |
| <i>A. fuliginosus</i>       | Unknown     | Pair        | Palaearctic | --         | --            | --              |
| <i>Psaltriparus minimus</i> | Cooperation | Cooperation | Nearctic    | [632]      | --            | --              |
| <i>Psaltria exilis</i>      | Unknown     | Pair        | Indomalayan | [598]      | --            | --              |
| <i>Leptopoecile sophiae</i> | Suspected   | Cooperation | Palaearctic | [633, 634] | --            | [433, 613, 634] |
| <i>L. elegans</i>           | Unknown     | Cooperation | Palaearctic | [635]      | --            | --              |

**Sylvioidea: Pycnonotidae**

|                              |             |             |             |            |               |            |
|------------------------------|-------------|-------------|-------------|------------|---------------|------------|
| <i>Spizixos canifrons</i>    | Cooperation | Cooperation | Indomalayan | [636]      | bbdbbbbbbabba | [433, 613] |
| <i>S. semitorques</i>        | Unknown     | Cooperation | Indomalayan | --         | --            | --         |
| <i>Pycnonotus zeylanicus</i> | Cooperation | Cooperation | Indomalayan | --         | --            | --         |
| <i>P. striatus</i>           | Unknown     | Pair        | Indomalayan | --         | --            | --         |
| <i>P. leucogrammicus</i>     | Unknown     | Pair        | Indomalayan | --         | --            | --         |
| <i>P. tympanistrigus</i>     | Unknown     | Pair        | Indomalayan | --         | --            | --         |
| <i>P. melanoleucos</i>       | Unknown     | Pair        | Indomalayan | --         | --            | --         |
| <i>P. priocephalus</i>       | Unknown     | Pair        | Indomalayan | --         | --            | --         |
| <i>P. atriceps</i>           | Pair        | Pair        | Indomalayan | --         | --            | --         |
| <i>P. melanicterus</i>       | Pair        | Pair        | Indomalayan | --         | --            | --         |
| <i>P. squamatus</i>          | Unknown     | Pair        | Indomalayan | --         | --            | --         |
| <i>P. cyaniventris</i>       | Pair        | Pair        | Indomalayan | --         | --            | --         |
| <i>P. jocosus</i>            | Pair        | Pair        | Indomalayan | --         | --            | --         |
| <i>P. xanthorrhous</i>       | Unknown     | Pair        | Indomalayan | --         | --            | --         |
| <i>P. sinensis</i>           | Unknown     | Pair        | Indomalayan | --         | --            | --         |
| <i>P. taivanus</i>           | Pair        | Pair        | Indomalayan | --         | --            | --         |
| <i>P. barbatus</i>           | Cooperation | Cooperation | Africa      | [615, 636] | --            | --         |
| <i>P. somaliensis</i>        | Subspp      | Subspp      | Africa      | [503]      | --            | --         |
| <i>P. dodsoni</i>            | Subspp      | Subspp      | Africa      | --         | --            | --         |

|                             |             |             |             |            |    |    |
|-----------------------------|-------------|-------------|-------------|------------|----|----|
| <i>P. tricolor</i>          | Subspp      | Subspp      | Africa      | --         | -- | -- |
| <i>P. nigricans</i>         | Pair        | Pair        | Africa      | [636]      | -- | -- |
| <i>P. capensis</i>          | Pair        | Pair        | Africa      | --         | -- | -- |
| <i>P. xanthopygos</i>       | Pair        | Pair        | Palaearctic | --         | -- | -- |
| <i>P. leucotis</i>          | Suspected   | Cooperation | Palaearctic | --         | -- | -- |
| <i>P. leucogenys</i>        | Suspected   | Cooperation | Palaearctic | [615, 636] | -- | -- |
| <i>P. cafer</i>             | Pair        | Pair        | Indomalayan | [636]      | -- | -- |
| <i>P. aurigaster</i>        | Unknown     | Pair        | Indomalayan | --         | -- | -- |
| <i>P. eutilotus</i>         | Unknown     | Pair        | Indomalayan | --         | -- | -- |
| <i>P. nieuwenhuisii</i>     | Unknown     | Pair        | Indomalayan | --         | -- | -- |
| <i>P. urostictus</i>        | Unknown     | Pair        | Indomalayan | --         | -- | -- |
| <i>P. bimaculatus</i>       | Unknown     | Pair        | Indomalayan | --         | -- | -- |
| <i>P. finlaysoni</i>        | Pair        | Pair        | Indomalayan | --         | -- | -- |
| <i>P. xantholaemus</i>      | Pair        | Pair        | Indomalayan | --         | -- | -- |
| <i>P. penicillatus</i>      | Unknown     | Pair        | Indomalayan | --         | -- | -- |
| <i>P. flavescens</i>        | Pair        | Pair        | Indomalayan | --         | -- | -- |
| <i>P. luteolus</i>          | Unknown     | Pair        | Indomalayan | --         | -- | -- |
| <i>P. goiavier</i>          | Pair        | Pair        | Indomalayan | --         | -- | -- |
| <i>P. plumosus</i>          | Pair        | Pair        | Indomalayan | --         | -- | -- |
| <i>P. blanfordi</i>         | Unknown     | Pair        | Indomalayan | --         | -- | -- |
| <i>P. simplex</i>           | Unknown     | Pair        | Indomalayan | --         | -- | -- |
| <i>P. brunneus</i>          | Pair        | Pair        | Indomalayan | --         | -- | -- |
| <i>P. erythrophthalmos</i>  | Unknown     | Pair        | Indomalayan | --         | -- | -- |
| <i>Andropadus montanus</i>  | Unknown     | Pair        | Africa      | --         | -- | -- |
| <i>A. kakamegae</i>         | Subspp      | Subspp      | Africa      | --         | -- | -- |
| <i>A. masukuensis</i>       | Unknown     | Pair        | Africa      | --         | -- | -- |
| <i>A. virens</i>            | Pair        | Pair        | Africa      | --         | -- | -- |
| <i>A. hallae</i>            | Subspp      | Subspp      | Africa      | --         | -- | -- |
| <i>A. gracilis</i>          | Unknown     | Pair        | Africa      | --         | -- | -- |
| <i>A. ansorgei</i>          | Unknown     | Pair        | Africa      | --         | -- | -- |
| <i>A. curvirostris</i>      | Unknown     | Pair        | Africa      | --         | -- | -- |
| <i>A. gracilirostris</i>    | Unknown     | Pair        | Africa      | --         | -- | -- |
| <i>A. importunus</i>        | Pair        | Pair        | Africa      | --         | -- | -- |
| <i>A. latirostris</i>       | Female only | Female only | Africa      | [503, 636] | -- | -- |
| <i>A. tephrolaemus</i>      | Pair        | Pair        | Africa      | [636]      | -- | -- |
| <i>A. nigriceps</i>         | Pair        | Pair        | Africa      | --         | -- | -- |
| <i>A. chlorigula</i>        | Subspp      | Subspp      | Africa      | --         | -- | -- |
| <i>A. olivaceiceps</i>      | Subspp      | Subspp      | Africa      | --         | -- | -- |
| <i>A. milanjensis</i>       | Pair        | Pair        | Africa      | --         | -- | -- |
| <i>Calyptocichla serina</i> | Pair        | Pair        | Africa      | --         | -- | -- |
| <i>Baeopogon indicator</i>  | Unknown     | Pair        | Africa      | --         | -- | -- |
| <i>B. clamans</i>           | Unknown     | Pair        | Africa      | --         | -- | -- |
| <i>Ixonotus guttatus</i>    | Cooperation | Cooperation | Africa      | --         | -- | -- |

|                                   |             |             |             |            |    |    |
|-----------------------------------|-------------|-------------|-------------|------------|----|----|
| <i>Chlorocichla simplex</i>       | Unknown     | Cooperation | Africa      | --         | -- | -- |
| <i>C. flavicollis</i>             | Cooperation | Cooperation | Africa      | --         | -- | -- |
| <i>C. falkensteini</i>            | Unknown     | Cooperation | Africa      | --         | -- | -- |
| <i>C. flaviventris</i>            | Pair        | Pair        | Africa      | --         | -- | -- |
| <i>C. laetissima</i>              | Unknown     | Pair        | Africa      | --         | -- | -- |
| <i>C. prigoginei</i>              | Unknown     | Pair        | Africa      | --         | -- | -- |
| <i>Thescelocichla leucopleura</i> | Cooperation | Cooperation | Africa      | --         | -- | -- |
| <i>Pyrrhurus scandens</i>         | Suspected   | Cooperation | Africa      | --         | -- | -- |
| <i>Phyllastrephus cabanisi</i>    | Pair        | Pair        | Africa      | --         | -- | -- |
| <i>P. fischeri</i>                | Unknown     | Pair        | Africa      | --         | -- | -- |
| <i>P. placidus</i>                | Subspp      | Subspp      | Africa      | --         | -- | -- |
| <i>P. terrestris</i>              | Pair        | Pair        | Africa      | --         | -- | -- |
| <i>P. strepitans</i>              | Unknown     | Pair        | Africa      | --         | -- | -- |
| <i>P. fulviventris</i>            | Unknown     | Pair        | Africa      | --         | -- | -- |
| <i>P. cerviniventris</i>          | Pair        | Pair        | Africa      | --         | -- | -- |
| <i>P. baumanni</i>                | Unknown     | Pair        | Africa      | --         | -- | -- |
| <i>P. poensis</i>                 | Unknown     | Pair        | Africa      | --         | -- | -- |
| <i>P. hypochloris</i>             | Unknown     | Pair        | Africa      | --         | -- | -- |
| <i>P. lorentzi</i>                | Unknown     | Pair        | Africa      | --         | -- | -- |
| <i>P. poliocephalus</i>           | Unknown     | Pair        | Africa      | --         | -- | -- |
| <i>P. flavostriatus</i>           | Pair        | Pair        | Africa      | --         | -- | -- |
| <i>P. alfredi</i>                 | Subspp      | Subspp      | Africa      | --         | -- | -- |
| <i>P. debilis</i>                 | Pair        | Pair        | Africa      | --         | -- | -- |
| <i>P. albigularis</i>             | Unknown     | Pair        | Africa      | --         | -- | -- |
| <i>P. icterinus</i>               | Pair        | Pair        | Africa      | --         | -- | -- |
| <i>P. leucolepis</i>              | Unknown     | Pair        | Africa      | --         | -- | -- |
| <i>P. xavieri</i>                 | Pair        | Pair        | Africa      | --         | -- | -- |
| <i>Bleda syndactyla</i>           | Pair        | Pair        | Africa      | --         | -- | -- |
| <i>B. eximia</i>                  | Pair        | Pair        | Africa      | --         | -- | -- |
| <i>B. canicapilla</i>             | Unknown     | Pair        | Africa      | --         | -- | -- |
| <i>Criniger barbatus</i>          | Unknown     | Cooperation | Africa      | [503, 636] | -- | -- |
| <i>C. chloronotus</i>             | Suspected   | Cooperation | Africa      | --         | -- | -- |
| <i>C. calurus</i>                 | Suspected   | Cooperation | Africa      | --         | -- | -- |
| <i>C. olivaceus</i>               | Unknown     | Cooperation | Africa      | --         | -- | -- |
| <i>C. ndussumensis</i>            | Unknown     | Cooperation | Africa      | --         | -- | -- |
| <i>Alophoixus finschii</i>        | Pair        | Pair        | Indomalayan | [636]      | -- | -- |
| <i>A. flaveolus</i>               | Pair        | Pair        | Indomalayan | --         | -- | -- |
| <i>A. pallidus</i>                | Suspected   | Cooperation | Indomalayan | --         | -- | -- |
| <i>A. ochraceus</i>               | Pair        | Pair        | Indomalayan | --         | -- | -- |
| <i>A. bres</i>                    | Unknown     | Pair        | Indomalayan | --         | -- | -- |
| <i>A. phaeocephalus</i>           | Unknown     | Pair        | Indomalayan | --         | -- | -- |
| <i>Thapsinillas affinis</i>       | Unknown     | Pair        | Australia   | --         | -- | -- |
| <i>Setornis criniger</i>          | Unknown     | Pair        | Indomalayan | --         | -- | -- |

|                                 |             |             |             |       |                |            |       |
|---------------------------------|-------------|-------------|-------------|-------|----------------|------------|-------|
| <i>Tricholestes criniger</i>    | Unknown     | Pair        | Indomalayan | --    | --             | --         |       |
| <i>Iole virescens</i>           | Unknown     | Pair        | Indomalayan | --    | --             | --         |       |
| <i>I. propinqua</i>             | Unknown     | Pair        | Indomalayan | --    | --             | --         |       |
| <i>I. olivacea</i>              | Pair        | Pair        | Indomalayan | --    | --             | --         |       |
| <i>Acritillas indica</i>        | Suspected   | Cooperation | Indomalayan | --    | --             | --         |       |
| <i>Ixos palawanensis</i>        | Unknown     | Pair        | Indomalayan | --    | --             | --         |       |
| <i>I. philippinus</i>           | Unknown     | Pair        | Indomalayan | --    | --             | --         |       |
| <i>I. rufigularis</i>           | Unknown     | Pair        | Indomalayan | --    | --             | --         |       |
| <i>I. siquijorensis</i>         | Unknown     | Pair        | Indomalayan | --    | --             | --         |       |
| <i>Microscelis amaurotis</i>    | Pair        | Pair        | Indomalayan | --    | --             | --         |       |
| <i>Ixos everetti</i>            | Unknown     | Pair        | Indomalayan | --    | --             | --         |       |
| <i>I. malaccensis</i>           | Pair        | Pair        | Indomalayan | --    | --             | --         |       |
| <i>Hemixos flava</i>            | Pair        | Pair        | Indomalayan | --    | --             | --         |       |
| <i>H. castanonotus</i>          | Pair        | Pair        | Indomalayan | --    | --             | --         |       |
| <i>Hypsipetes mccllellandii</i> | Pair        | Pair        | Indomalayan | --    | --             | --         |       |
| <i>H. virescens</i>             | Unknown     | Pair        | Indomalayan | --    | --             | --         |       |
| <i>H. madagascariensis</i>      | Unknown     | Pair        | Africa      | --    | --             | --         |       |
| <i>H. crassirostris</i>         | Group       | Pair        | Africa      | --    | --             | --         |       |
| <i>H. parvirostris</i>          | Unknown     | Pair        | Africa      | --    | --             | --         |       |
| <i>H. olivaceus</i>             | Cooperation | Cooperation | Africa      | --    | --             | --         |       |
| <i>H. borbonicus</i>            | Unknown     | Pair        | Africa      | --    | --             | --         |       |
| <i>H. leucocephalus</i>         | Unknown     | Pair        | Indomalayan | --    | --             | --         |       |
| <i>H. nicobariensis</i>         | Unknown     | Pair        | Indomalayan | --    | --             | --         |       |
| <i>Cerasophila thompsoni</i>    | Unknown     | Pair        | Indomalayan | --    | --             | --         |       |
| <i>Neolestes torquatus</i>      | Pair        | Pair        | Africa      | --    | --             | --         |       |
| <b>Sylvioidea: Cisticolidae</b> |             |             |             |       |                |            |       |
| <i>Cisticola erythrops</i>      | Pair        | Pair        | Africa      | [524] | bbdbbbbbbabbba | [433, 613] | [591] |
| <i>C. lepe</i>                  | Subspp      | Subspp      | Africa      | --    | --             | --         | --    |
| <i>C. cantans</i>               | Pair        | Pair        | Africa      | --    | --             | --         | --    |
| <i>C. lateralis</i>             | Unknown     | Pair        | Africa      | --    | --             | --         | --    |
| <i>C. anonymus</i>              | Cooperation | Cooperation | Africa      | --    | --             | --         | --    |
| <i>C. woosnami</i>              | Unknown     | Cooperation | Africa      | --    | --             | --         | --    |
| <i>C. bulliens</i>              | Unknown     | Pair        | Africa      | --    | --             | --         | --    |
| <i>C. discolor</i>              | Subspp      | Subspp      | Africa      | --    | --             | --         | --    |
| <i>C. chubbi</i>                | Pair        | Pair        | Africa      | --    | --             | --         | --    |
| <i>C. hunteri</i>               | Pair        | Pair        | Africa      | --    | --             | --         | --    |
| <i>C. nigriloris</i>            | Cooperation | Cooperation | Africa      | --    | --             | --         | --    |
| <i>C. emini</i>                 | Subspp      | Subspp      | Africa      | --    | --             | --         | --    |
| <i>C. aberrans</i>              | Pair        | Pair        | Africa      | --    | --             | --         | --    |
| <i>C. bodessa</i>               | Unknown     | Pair        | Africa      | --    | --             | --         | --    |
| <i>C. chinianus</i>             | Cooperation | Cooperation | Africa      | [637] | --             | --         | --    |
| <i>C. cinereolus</i>            | Suspected   | Cooperation | Africa      | [524] | --             | --         | --    |
| <i>C. ruficeps</i>              | Unknown     | Pair        | Africa      | --    | --             | --         | --    |

|                            |             |             |             |            |    |    |       |
|----------------------------|-------------|-------------|-------------|------------|----|----|-------|
| <i>C. mongalla</i>         | Subspp      | Subspp      | Africa      | --         | -- | -- | --    |
| <i>C. dorsti</i>           | Unknown     | Pair        | Africa      | --         | -- | -- | --    |
| <i>C. rufilatus</i>        | Pair        | Pair        | Africa      | --         | -- | -- | --    |
| <i>C. subruficapillus</i>  | Pair        | Pair        | Africa      | --         | -- | -- | --    |
| <i>C. lais</i>             | Unknown     | Pair        | Africa      | --         | -- | -- | --    |
| <i>C. distinctus</i>       | Subspp      | Subspp      | Africa      | --         | -- | -- | --    |
| <i>C. restrictus</i>       | Unknown     | Pair        | Africa      | --         | -- | -- | --    |
| <i>C. njombe</i>           | Unknown     | Pair        | Africa      | --         | -- | -- | --    |
| <i>C. galactotes</i>       | Pair        | Pair        | Africa      | --         | -- | -- | --    |
| <i>C. pipiens</i>          | Unknown     | Pair        | Africa      | [524, 638] | -- | -- | --    |
| <i>C. carruthersi</i>      | Unknown     | Pair        | Africa      | [524]      | -- | -- | --    |
| <i>C. tinniensi</i>        | Pair        | Pair        | Africa      | --         | -- | -- | --    |
| <i>C. angolensis</i>       | Subspp      | Subspp      | Africa      | --         | -- | -- | --    |
| <i>C. robustus</i>         | Cooperation | Cooperation | Africa      | [524, 639] | -- | -- | --    |
| <i>C. aberdare</i>         | Unknown     | Cooperation | Africa      | [524]      | -- | -- | --    |
| <i>C. natalensis</i>       | Unknown     | Pair        | Africa      | --         | -- | -- | --    |
| <i>C. fulvicapillus</i>    | Pair        | Pair        | Africa      | --         | -- | -- | --    |
| <i>C. angusticauda</i>     | Pair        | Pair        | Africa      | --         | -- | -- | --    |
| <i>C. melanurus</i>        | Unknown     | Pair        | Africa      | --         | -- | -- | --    |
| <i>C. brachypterus</i>     | Pair        | Pair        | Africa      | --         | -- | -- | --    |
| <i>C. rufus</i>            | Unknown     | Pair        | Africa      | --         | -- | -- | --    |
| <i>C. troglodytes</i>      | Unknown     | Pair        | Africa      | --         | -- | -- | --    |
| <i>C. nanus</i>            | Unknown     | Pair        | Africa      | --         | -- | -- | --    |
| <i>C. incanus</i>          | Unknown     | Pair        | Africa      | --         | -- | -- | --    |
| <i>C. juncidis</i>         | Female only | Female only | Widespread  | --         | -- | -- | --    |
| <i>C. haesitatus</i>       | Unknown     | Pair        | Africa      | [445]      | -- | -- | --    |
| <i>C. cherinus</i>         | Unknown     | Pair        | Africa      | [524]      | -- | -- | --    |
| <i>C. aridulus</i>         | Pair        | Pair        | Africa      | --         | -- | -- | --    |
| <i>C. textrix</i>          | Pair        | Pair        | Africa      | --         | -- | -- | --    |
| <i>C. eximius</i>          | Unknown     | Pair        | Africa      | [524, 640] | -- | -- | --    |
| <i>C. dambo</i>            | Pair        | Pair        | Africa      | [524]      | -- | -- | --    |
| <i>C. brunnescens</i>      | Unknown     | Cooperation | Africa      | --         | -- | -- | --    |
| <i>C. ayresii</i>          | Pair        | Pair        | Africa      | --         | -- | -- | --    |
| <i>C. exilis</i>           | Female only | Female only | Australia   | [641]      | -- | -- | --    |
| <i>Scotocerca inquieta</i> | Pair        | Pair        | Palaearctic | [524]      | -- | -- | [3]   |
| <i>Prinia burnesii</i>     | Unknown     | Pair        | Indomalayan | [635]      | -- | -- | [591] |
| <i>P. criniger</i>         | Pair        | Pair        | Indomalayan | --         | -- | -- | --    |
| <i>P. polychroa</i>        | Unknown     | Pair        | Indomalayan | [642]      | -- | -- | --    |
| <i>P. atrogularis</i>      | Pair        | Pair        | Indomalayan | [635]      | -- | -- | --    |
| <i>P. cinereocapilla</i>   | Unknown     | Pair        | Indomalayan | [455]      | -- | -- | --    |
| <i>P. buchanani</i>        | Pair        | Pair        | Indomalayan | [635]      | -- | -- | --    |
| <i>P. rufescens</i>        | Pair        | Pair        | Indomalayan | --         | -- | -- | --    |
| <i>P. hodgsonii</i>        | Pair        | Pair        | Indomalayan | --         | -- | -- | --    |

|                               |             |             |             |            |    |    |       |
|-------------------------------|-------------|-------------|-------------|------------|----|----|-------|
| <i>P. gracilis</i>            | Pair        | Pair        | Palaearctic | [643]      | -- | -- | --    |
| <i>P. sylvatica</i>           | Pair        | Pair        | Indomalayan | [635]      | -- | -- | --    |
| <i>P. familiaris</i>          | Unknown     | Pair        | Indomalayan | [642]      | -- | -- | --    |
| <i>P. flaviventris</i>        | Pair        | Pair        | Indomalayan | [644]      | -- | -- | --    |
| <i>P. socialis</i>            | Pair        | Pair        | Indomalayan | [635]      | -- | -- | --    |
| <i>P. subflava</i>            | Cooperation | Cooperation | Africa      | [639]      | -- | -- | --    |
| <i>P. somalica</i>            | Unknown     | Pair        | Africa      | [524]      | -- | -- | --    |
| <i>P. inornata</i>            | Pair        | Pair        | Africa      | [644]      | -- | -- | --    |
| <i>P. fluviatilis</i>         | Unknown     | Pair        | Africa      | [524]      | -- | -- | --    |
| <i>P. flavicans</i>           | Pair        | Pair        | Africa      | --         | -- | -- | --    |
| <i>P. maculosa</i>            | Pair        | Pair        | Africa      | --         | -- | -- | --    |
| <i>P. mollerii</i>            | Pair        | Pair        | Africa      | --         | -- | -- | --    |
| <i>P. leontica</i>            | Unknown     | Pair        | Africa      | [524, 645] | -- | -- | --    |
| <i>P. leucopogon</i>          | Suspected   | Cooperation | Africa      | [524]      | -- | -- | --    |
| <i>P. bairdii</i>             | Cooperation | Cooperation | Africa      | --         | -- | -- | --    |
| <i>P. melanops</i>            | Pair        | Pair        | Africa      | --         | -- | -- | --    |
| <i>Phragmacia substriata</i>  | Pair        | Pair        | Africa      | --         | -- | -- | [3]   |
| <i>Oreophilais robertsi</i>   | Unknown     | Pair        | Africa      | --         | -- | -- | --    |
| <i>Heliolais erythroptera</i> | Unknown     | Pair        | Africa      | --         | -- | -- | [613] |
| <i>Malcorus pectoralis</i>    | Pair        | Pair        | Africa      | --         | -- | -- | [3]   |
| <i>Drymocichla incana</i>     | Unknown     | Pair        | Africa      | --         | -- | -- | --    |
| <i>Urolais epichlora</i>      | Unknown     | Pair        | Africa      | --         | -- | -- | --    |
| <i>Spiloptila clamans</i>     | Unknown     | Pair        | Africa      | --         | -- | -- | [613] |
| <i>Apalis pulchra</i>         | Pair        | Pair        | Africa      | --         | -- | -- | [591] |
| <i>A. ruwenzorii</i>          | Pair        | Pair        | Africa      | --         | -- | -- | --    |
| <i>A. thoracica</i>           | Pair        | Pair        | Africa      | --         | -- | -- | --    |
| <i>A. nigriceps</i>           | Unknown     | Pair        | Africa      | --         | -- | -- | --    |
| <i>A. jacksoni</i>            | Unknown     | Pair        | Africa      | --         | -- | -- | --    |
| <i>A. chariessa</i>           | Pair        | Pair        | Africa      | --         | -- | -- | --    |
| <i>A. binotata</i>            | Pair        | Pair        | Africa      | --         | -- | -- | --    |
| <i>A. personata</i>           | Unknown     | Pair        | Africa      | --         | -- | -- | --    |
| <i>A. flavida</i>             | Pair        | Pair        | Africa      | --         | -- | -- | --    |
| <i>A. viridiceps</i>          | Subspp      | Subspp      | Africa      | --         | -- | -- | --    |
| <i>A. ruddi</i>               | Pair        | Pair        | Africa      | --         | -- | -- | --    |
| <i>A. sharpii</i>             | Unknown     | Pair        | Africa      | --         | -- | -- | --    |
| <i>A. rufogularis</i>         | Unknown     | Pair        | Africa      | --         | -- | -- | --    |
| <i>A. argentea</i>            | Subspp      | Subspp      | Africa      | --         | -- | -- | --    |
| <i>A. bamendae</i>            | Unknown     | Pair        | Africa      | --         | -- | -- | --    |
| <i>A. goslingi</i>            | Unknown     | Pair        | Africa      | --         | -- | -- | --    |
| <i>A. porphyrolaema</i>       | Unknown     | Pair        | Africa      | --         | -- | -- | --    |
| <i>A. kaboboensis</i>         | Subspp      | Subspp      | Africa      | --         | -- | -- | --    |
| <i>A. chapini</i>             | Pair        | Pair        | Africa      | --         | -- | -- | --    |
| <i>A. melanocephala</i>       | Suspected   | Cooperation | Africa      | --         | -- | -- | --    |



|                                    |         |             |             |       |                 |            |                    |
|------------------------------------|---------|-------------|-------------|-------|-----------------|------------|--------------------|
| <i>A. chirindensis</i>             | Pair    | Pair        | Africa      | --    | --              | --         | --                 |
| <i>A. cinerea</i>                  | Unknown | Pair        | Africa      | --    | --              | --         | --                 |
| <i>A. alticola</i>                 | Unknown | Pair        | Africa      | --    | --              | --         | --                 |
| <i>A. karamojae</i>                | Unknown | Pair        | Africa      | --    | --              | --         | --                 |
| <i>A. rufifrons</i>                | Pair    | Pair        | Africa      | --    | --              | --         | --                 |
| <i>Hypergerus atriceps</i>         | Pair    | Pair        | Africa      | --    | --              | --         | [585]              |
| <i>Eminia lepida</i>               | Pair    | Pair        | Africa      | --    | --              | --         | [585, 591]         |
| <i>Camaroptera brevicaudata</i>    | Subspp  | Subspp      | Africa      | --    | --              | --         | [585]              |
| <i>C. harterti</i>                 | Subspp  | Subspp      | Africa      | --    | --              | --         | --                 |
| <i>C. brachyura</i>                | Pair    | Pair        | Africa      | --    | --              | --         | --                 |
| <i>C. superciliaris</i>            | Pair    | Pair        | Africa      | --    | --              | --         | --                 |
| <i>C. chloronota</i>               | Pair    | Pair        | Africa      | --    | --              | --         | --                 |
| <i>Calamonastes simplex</i>        | Pair    | Pair        | Africa      | --    | --              | --         | --                 |
| <i>C. stierlingi</i>               | Pair    | Pair        | Africa      | --    | --              | --         | --                 |
| <i>C. fasciolatus</i>              | Pair    | Pair        | Africa      | --    | --              | --         | --                 |
| <i>Euryptila subcinnamomea</i>     | Unknown | Pair        | Africa      | --    | --              | --         | [591]              |
| <i>Neomixis tenella</i>            | Unknown | Pair        | Africa      | [525] | --              | --         | [585]              |
| <i>N. viridis</i>                  | Unknown | Pair        | Africa      | --    | --              | --         | --                 |
| <i>N. striatigula</i>              | Unknown | Pair        | Africa      | --    | --              | --         | --                 |
| <i>Orthotomus sutorius</i>         | Pair    | Pair        | Indomalayan | [635] | --              | --         | [591, 613]         |
| <i>O. atrogularis</i>              | Pair    | Pair        | Indomalayan | --    | --              | --         | [613]              |
| <i>Bathmocercus cerviniventris</i> | Unknown | Pair        | Africa      | [524] | --              | --         | --                 |
| <i>B. rufus</i>                    | Pair    | Pair        | Africa      | --    | --              | --         | --                 |
| <i>Scepomycter winifredae</i>      | Unknown | Pair        | Africa      | --    | --              | --         | [524, 613]         |
| <b>Sylvioidea: Timaliidae</b>      |         |             |             |       |                 |            |                    |
| <i>Pseudoalcippe pyrrhoptera</i>   | Unknown | Cooperation | Africa      | [512] | bbdbbbbbbabbabb | [589, 613] | aa [477, 589, 613] |
| <i>P. atriceps</i>                 | Subspp  | Subspp      | Africa      | --    | --              | --         | --                 |
| <i>Sylvia buryi</i>                | Pair    | Pair        | Palaearctic | [646] | --              | --         | [477, 589]         |
| <i>S. lugens</i>                   | Pair    | Pair        | Africa      | --    | --              | --         | --                 |
| <i>S. boehmi</i>                   | Pair    | Pair        | Africa      | --    | --              | --         | --                 |
| <i>S. layardi</i>                  | Pair    | Pair        | Africa      | --    | --              | --         | --                 |
| <i>S. subcaeruleum</i>             | Pair    | Pair        | Africa      | --    | --              | --         | --                 |
| <i>S. atricapilla</i>              | Pair    | Pair        | Palaearctic | --    | --              | --         | --                 |
| <i>S. borin</i>                    | Pair    | Pair        | Palaearctic | --    | --              | --         | --                 |
| <i>S. communis</i>                 | Pair    | Pair        | Palaearctic | --    | --              | --         | --                 |
| <i>S. curruca</i>                  | Pair    | Pair        | Palaearctic | --    | --              | --         | --                 |
| <i>S. minula</i>                   | Pair    | Pair        | Palaearctic | --    | --              | --         | --                 |
| <i>S. althaea</i>                  | Pair    | Pair        | Palaearctic | --    | --              | --         | --                 |
| <i>S. nana</i>                     | Pair    | Pair        | Palaearctic | --    | --              | --         | --                 |
| <i>S. nisoria</i>                  | Pair    | Pair        | Palaearctic | --    | --              | --         | --                 |
| <i>S. hortensis</i>                | Pair    | Pair        | Palaearctic | --    | --              | --         | --                 |
| <i>S. leucomelaena</i>             | Pair    | Pair        | Palaearctic | --    | --              | --         | --                 |
| <i>S. rueppelli</i>                | Pair    | Pair        | Palaearctic | --    | --              | --         | --                 |

|                               |             |             |             |            |    |    |    |                 |
|-------------------------------|-------------|-------------|-------------|------------|----|----|----|-----------------|
| <i>S. melanocephala</i>       | Pair        | Pair        | Paelearctic | --         | -- | -- | -- | --              |
| <i>S. melanothorax</i>        | Pair        | Pair        | Paelearctic | --         | -- | -- | -- | --              |
| <i>S. cantillans</i>          | Pair        | Pair        | Paelearctic | --         | -- | -- | -- | --              |
| <i>S. mystacea</i>            | Pair        | Pair        | Paelearctic | --         | -- | -- | -- | --              |
| <i>S. conspicillata</i>       | Pair        | Pair        | Paelearctic | --         | -- | -- | -- | --              |
| <i>S. deserticola</i>         | Pair        | Pair        | Paelearctic | --         | -- | -- | -- | --              |
| <i>S. undata</i>              | Cooperation | Cooperation | Paelearctic | --         | -- | -- | -- | --              |
| <i>S. sarda</i>               | Pair        | Pair        | Paelearctic | --         | -- | -- | -- | --              |
| <i>Chrysomma sinense</i>      | Cooperation | Cooperation | Indomalayan | [647]      | -- | -- | ab | --              |
| <i>C. altirostre</i>          | Pair        | Pair        | Indomalayan | [455]      | -- | -- | -- | --              |
| <i>C. poecilotis</i>          | Unknown     | Cooperation | Paelearctic | [648]      | -- | -- | -- | --              |
| <i>Alcippe chrysotis</i>      | Unknown     | Pair        | Indomalayan | --         | -- | -- | -- | --              |
| <i>A. cinereiceps</i>         | Unknown     | Pair        | Paelearctic | --         | -- | -- | -- | --              |
| <i>Panurus biarmicus</i>      | Pair        | Pair        | Paelearctic | [511]      | -- | -- | -- | --              |
| <i>Conostoma oemodium</i>     | Unknown     | Pair        | Paelearctic | [649]      | -- | -- | -- | --              |
| <i>Paradoxornis paradoxus</i> | Unknown     | Pair        | Paelearctic | [648]      | -- | -- | -- | --              |
| <i>P. unicolor</i>            | Unknown     | Pair        | Paelearctic | [649]      | -- | -- | -- | --              |
| <i>P. gularis</i>             | Unknown     | Pair        | Paelearctic | --         | -- | -- | -- | --              |
| <i>P. flavirostris</i>        | Unknown     | Pair        | Paelearctic | [455]      | -- | -- | -- | --              |
| <i>P. guttaticollis</i>       | Unknown     | Pair        | Paelearctic | [649]      | -- | -- | -- | --              |
| <i>P. conspicillatus</i>      | Unknown     | Pair        | Paelearctic | [648]      | -- | -- | -- | --              |
| <i>P. webbianus</i>           | Pair        | Pair        | Paelearctic | [650, 651] | -- | -- | -- | --              |
| <i>P. brunneus</i>            | Unknown     | Pair        | Indomalayan | [508]      | -- | -- | -- | --              |
| <i>P. alphonsianus</i>        | Unknown     | Pair        | Paelearctic | [648]      | -- | -- | -- | --              |
| <i>P. zappeyi</i>             | Unknown     | Pair        | Paelearctic | [455]      | -- | -- | -- | --              |
| <i>P. przewalskii</i>         | Unknown     | Pair        | Paelearctic | --         | -- | -- | -- | --              |
| <i>P. fulvifrons</i>          | Unknown     | Pair        | Paelearctic | [649]      | -- | -- | -- | --              |
| <i>P. nipalensis</i>          | Unknown     | Pair        | Paelearctic | --         | -- | -- | -- | --              |
| <i>P. verreauxi</i>           | Unknown     | Pair        | Indomalayan | [508]      | -- | -- | -- | --              |
| <i>P. davidianus</i>          | Unknown     | Pair        | Indomalayan | [445]      | -- | -- | -- | --              |
| <i>P. atrosuperciliaris</i>   | Unknown     | Pair        | Paelearctic | [649]      | -- | -- | -- | --              |
| <i>P. ruficeps</i>            | Unknown     | Pair        | Paelearctic | --         | -- | -- | -- | --              |
| <i>P. heudei</i>              | Pair        | Pair        | Paelearctic | [652]      | -- | -- | -- | --              |
| <i>Chamaea fasciata</i>       | Pair        | Pair        | Paelearctic | [653]      | -- | -- | -- | [477, 589, 613] |
| <i>Yuhina plateni</i>         | Unknown     | Pair        | Indomalayan | [468]      | -- | -- | ba | [477]           |
| <i>Y. dennistouni</i>         | Unknown     | Pair        | Indomalayan | --         | -- | -- | -- | --              |
| <i>Y. nigrocapitata</i>       | Unknown     | Pair        | Indomalayan | --         | -- | -- | -- | --              |
| <i>Y. capitalis</i>           | Unknown     | Pair        | Indomalayan | --         | -- | -- | -- | --              |
| <i>Y. speciosa</i>            | Pair        | Pair        | Indomalayan | [455]      | -- | -- | -- | --              |
| <i>Y. whiteheadi</i>          | Unknown     | Pair        | Indomalayan | [468]      | -- | -- | -- | --              |
| <i>Y. striata</i>             | Unknown     | Pair        | Indomalayan | --         | -- | -- | -- | --              |
| <i>Y. latistriata</i>         | Unknown     | Pair        | Indomalayan | --         | -- | -- | -- | --              |
| <i>Y. nigrorum</i>            | Unknown     | Pair        | Indomalayan | --         | -- | -- | -- | --              |

|                                |             |             |             |            |    |    |    |            |
|--------------------------------|-------------|-------------|-------------|------------|----|----|----|------------|
| <i>Y. hypogrammica</i>         | Unknown     | Pair        | Indomalayan | [455]      | -- | -- | -- | --         |
| <i>Y. castaniceps</i>          | Unknown     | Pair        | Indomalayan | [513]      | -- | -- | -- | [477, 589] |
| <i>Y. everetti</i>             | Cooperation | Cooperation | Indomalayan | [99, 476]  | -- | -- | -- | --         |
| <i>Y. bakeri</i>               | Pair        | Pair        | Indomalayan | [513]      | -- | -- | -- | --         |
| <i>Y. flavicollis</i>          | Pair        | Pair        | Indomalayan | --         | -- | -- | -- | --         |
| <i>Y. humilis</i>              | Unknown     | Pair        | Indomalayan | [508]      | -- | -- | -- | --         |
| <i>Y. gularis</i>              | Unknown     | Pair        | Palaearctic | [513]      | -- | -- | -- | --         |
| <i>Y. diademata</i>            | Unknown     | Pair        | Indomalayan | [508]      | -- | -- | -- | --         |
| <i>Y. occipitalis</i>          | Unknown     | Pair        | Indomalayan | [513]      | -- | -- | -- | --         |
| <i>Y. brunneiceps</i>          | Cooperation | Cooperation | Palaearctic | [654]      | -- | -- | -- | --         |
| <i>Y. nigrimenta</i>           | Unknown     | Cooperation | Indomalayan | [513]      | -- | -- | -- | --         |
| <i>Speirops melanocephalus</i> | Unknown     | Cooperation | Africa      | [512]      | -- | -- | -- | --         |
| <i>S. lugubris</i>             | Cooperation | Cooperation | Africa      | [512, 655] | -- | -- | -- | --         |
| <i>S. brunneus</i>             | Unknown     | Cooperation | Africa      | [512]      | -- | -- | -- | --         |
| <i>S. leucophoeus</i>          | Suspected   | Cooperation | Africa      | [512, 655] | -- | -- | -- | --         |
| <i>Zosterops senegalensis</i>  | Pair        | Pair        | Africa      | [512]      | -- | -- | -- | --         |
| <i>Z. vaughani</i>             | Unknown     | Pair        | Africa      | --         | -- | -- | -- | --         |
| <i>Z. mayottensis</i>          | Unknown     | Pair        | Africa      | no source  | -- | -- | -- | --         |
| <i>Z. poliogaster</i>          | Pair        | Pair        | Africa      | [512]      | -- | -- | -- | --         |
| <i>Z. abyssinicus</i>          | Pair        | Pair        | Africa      | --         | -- | -- | -- | --         |
| <i>Z. pallidus</i>             | Pair        | Pair        | Africa      | --         | -- | -- | -- | --         |
| <i>Z. maderaspatanus</i>       | Unknown     | Pair        | Africa      | [539]      | -- | -- | -- | --         |
| <i>Z. mouroniensis</i>         | Unknown     | Pair        | Africa      | [445]      | -- | -- | -- | --         |
| <i>Z. ficedulinus</i>          | Unknown     | Pair        | Africa      | [512]      | -- | -- | -- | --         |
| <i>Z. griseovirescens</i>      | Unknown     | Pair        | Africa      | --         | -- | -- | -- | --         |
| <i>Z. borbonicus</i>           | Cooperation | Cooperation | Africa      | [549, 656] | -- | -- | -- | --         |
| <i>Z. olivaceus</i>            | Unknown     | Pair        | Africa      | [657]      | -- | -- | -- | --         |
| <i>Z. chloronothos</i>         | Unknown     | Pair        | Africa      | [549]      | -- | -- | -- | --         |
| <i>Z. modestus</i>             | Cooperation | Cooperation | Africa      | [539]      | -- | -- | -- | --         |
| <i>Z. ceylonensis</i>          | Pair        | Pair        | Indomalayan | [658]      | -- | -- | -- | --         |
| <i>Z. erythropleurus</i>       | Unknown     | Pair        | Palaearctic | [648]      | -- | -- | -- | --         |
| <i>Z. palpebrosus</i>          | Pair        | Pair        | Indomalayan | [659]      | -- | -- | -- | --         |
| <i>Z. japonicus</i>            | Occasional  | Pair        | Palaearctic | [660]      | -- | -- | -- | --         |
| <i>Z. meyeri</i>               | Unknown     | Pair        | Indomalayan | [468]      | -- | -- | -- | --         |
| <i>Z. salvadorii</i>           | Unknown     | Pair        | Indomalayan | no source  | -- | -- | -- | --         |
| <i>Z. conspicillatus</i>       | Unknown     | Pair        | Australia   | [661-663]  | -- | -- | -- | --         |
| <i>Z. hypolais</i>             | Unknown     | Pair        | Indomalayan | [445]      | -- | -- | -- | --         |
| <i>Z. semperi</i>              | Unknown     | Pair        | Indomalayan | no source  | -- | -- | -- | --         |
| <i>Z. atricapillus</i>         | Unknown     | Pair        | Indomalayan | [99]       | -- | -- | -- | --         |
| <i>Z. everetti</i>             | Unknown     | Pair        | Indomalayan | [468]      | -- | -- | -- | --         |
| <i>Z. nigrorum</i>             | Unknown     | Pair        | Indomalayan | --         | -- | -- | -- | --         |
| <i>Z. montanus</i>             | Unknown     | Pair        | Indomalayan | --         | -- | -- | -- | --         |
| <i>Z. natalis</i>              | Pair        | Pair        | Australia   | [664]      | -- | -- | -- | --         |

|                              |         |      |             |            |    |    |    |       |
|------------------------------|---------|------|-------------|------------|----|----|----|-------|
| <i>Z. flavus</i>             | Unknown | Pair | Indomalayan | [99]       | -- | -- | -- | --    |
| <i>Z. chloris</i>            | Unknown | Pair | Indomalayan | --         | -- | -- | -- | --    |
| <i>Z. citrinellus</i>        | Unknown | Pair | Australia   | [664]      | -- | -- | -- | --    |
| <i>Z. grayi</i>              | Unknown | Pair | Australia   | [445]      | -- | -- | -- | --    |
| <i>Z. uropygialis</i>        | Unknown | Pair | Australia   | --         | -- | -- | -- | --    |
| <i>Z. consobrinorum</i>      | Unknown | Pair | Australia   | [446]      | -- | -- | -- | --    |
| <i>Z. anomalus</i>           | Unknown | Pair | Australia   | --         | -- | -- | -- | --    |
| <i>Z. wallacei</i>           | Unknown | Pair | Australia   | --         | -- | -- | -- | --    |
| <i>Z. atrifrons</i>          | Unknown | Pair | Australia   | --         | -- | -- | -- | --    |
| <i>Z. atriceps</i>           | Unknown | Pair | Australia   | --         | -- | -- | -- | --    |
| <i>Z. minor</i>              | Unknown | Pair | Australia   | [434]      | -- | -- | -- | --    |
| <i>Z. meeki</i>              | Unknown | Pair | Australia   | --         | -- | -- | -- | --    |
| <i>Z. hypoxanthus</i>        | Unknown | Pair | Australia   | --         | -- | -- | -- | --    |
| <i>Z. mysorensis</i>         | Unknown | Pair | Australia   | [445]      | -- | -- | -- | --    |
| <i>Z. fuscicapillus</i>      | Unknown | Pair | Australia   | [434]      | -- | -- | -- | --    |
| <i>Z. buruensis</i>          | Unknown | Pair | Australia   | [446]      | -- | -- | -- | --    |
| <i>Z. kuehni</i>             | Unknown | Pair | Australia   | [445]      | -- | -- | -- | --    |
| <i>Z. novaeguineae</i>       | Unknown | Pair | Australia   | [434]      | -- | -- | -- | --    |
| <i>Z. luteus</i>             | Pair    | Pair | Australia   | [665]      | -- | -- | -- | --    |
| <i>Z. griseotinctus</i>      | Pair    | Pair | Australia   | [434]      | -- | -- | -- | --    |
| <i>Z. rennellianus</i>       | Unknown | Pair | Australia   | no source  | -- | -- | -- | --    |
| <i>Z. vellalavella</i>       | Unknown | Pair | Australia   | [445]      | -- | -- | -- | --    |
| <i>Z. splendidus</i>         | Unknown | Pair | Australia   | --         | -- | -- | -- | --    |
| <i>Z. luteirostris</i>       | Unknown | Pair | Australia   | --         | -- | -- | -- | --    |
| <i>Z. kulambangrae</i>       | Unknown | Pair | Australia   | [125, 434] | -- | -- | -- | --    |
| <i>Z. murphyi</i>            | Unknown | Pair | Australia   | no source  | -- | -- | -- | --    |
| <i>Z. metcalfii</i>          | Pair    | Pair | Australia   | [125, 434] | -- | -- | -- | --    |
| <i>Z. rendovae</i>           | Unknown | Pair | Australia   | no source  | -- | -- | -- | --    |
| <i>Z. stresemanni</i>        | Unknown | Pair | Australia   | --         | -- | -- | -- | --    |
| <i>Z. sanctaerucis</i>       | Unknown | Pair | Australia   | --         | -- | -- | -- | --    |
| <i>Z. lateralis</i>          | Pair    | Pair | Australia   | [666]      | -- | -- | -- | --    |
| <i>Z. inornatus</i>          | Unknown | Pair | Australia   | no source  | -- | -- | -- | --    |
| <i>Z. explorator</i>         | Unknown | Pair | Australia   | [450]      | -- | -- | -- | --    |
| <i>Z. flavifrons</i>         | Pair    | Pair | Australia   | [449]      | -- | -- | -- | --    |
| <i>Z. xanthochrous</i>       | Pair    | Pair | Australia   | [447]      | -- | -- | -- | --    |
| <i>Z. minutus</i>            | Unknown | Pair | Australia   | no source  | -- | -- | -- | --    |
| <i>Z. samoensis</i>          | Unknown | Pair | Australia   | [450]      | -- | -- | -- | --    |
| <i>Z. finschii</i>           | Unknown | Pair | Australia   | no source  | -- | -- | -- | --    |
| <i>Z. cinereus</i>           | Unknown | Pair | Australia   | --         | -- | -- | -- | --    |
| <i>Z. oleagineus</i>         | Unknown | Pair | Australia   | [445]      | -- | -- | -- | --    |
| <i>Rukia longirostra</i>     | Unknown | Pair | Australia   | --         | -- | -- | -- | --    |
| <i>R. ruki</i>               | Unknown | Pair | Australia   | [445, 667] | -- | -- | -- | --    |
| <i>Apalopteron familiare</i> | Pair    | Pair | Australia   | [668, 669] | -- | -- | -- | [668] |

|                                    |           |             |             |                 |    |    |       |                 |
|------------------------------------|-----------|-------------|-------------|-----------------|----|----|-------|-----------------|
| <i>Cleptornis marchei</i>          | Pair      | Pair        | Indomalayan | [670]           | -- | -- | --    | [477, 589, 613] |
| <i>Tephrozosterops stalker</i>     | Unknown   | Pair        | Australia   | [446]           | -- | -- | --    | [477, 589]      |
| <i>Madanga ruficollis</i>          | Unknown   | Pair        | Indomalayan | [455]           | -- | -- | --    | --              |
| <i>Lophozosterops javanicus</i>    | Unknown   | Pair        | Indomalayan | [642]           | -- | -- | --    | --              |
| <i>L. squamiceps</i>               | Unknown   | Pair        | Australia   | [446]           | -- | -- | --    | --              |
| <i>L. goodfellowi</i>              | Unknown   | Pair        | Indomalayan | [468]           | -- | -- | --    | --              |
| <i>L. superciliaris</i>            | Unknown   | Pair        | Australia   | [446]           | -- | -- | --    | --              |
| <i>L. pinaiae</i>                  | Unknown   | Pair        | Australia   | --              | -- | -- | --    | --              |
| <i>L. doherlyi</i>                 | Unknown   | Pair        | Australia   | --              | -- | -- | --    | --              |
| <i>Oculocincta squamifrons</i>     | Unknown   | Pair        | Indomalayan | [99]            | -- | -- | --    | --              |
| <i>Heleia crassirostris</i>        | Unknown   | Pair        | Australia   | [446]           | -- | -- | --    | --              |
| <i>H. muelleri</i>                 | Unknown   | Pair        | Australia   | [445]           | -- | -- | --    | --              |
| <i>Chlorocharis emiliae</i>        | Unknown   | Pair        | Indomalayan | [99]            | -- | -- | --    | --              |
| <i>Woodfordia superciliosa</i>     | Unknown   | Pair        | Australia   | no source       | -- | -- | --    | --              |
| <i>W. lacertosa</i>                | Unknown   | Pair        | Australia   | [445]           | -- | -- | --    | --              |
| <i>Megazosterops palauensis</i>    | Unknown   | Pair        | Australia   | --              | -- | -- | --    | --              |
| <i>Hypocryptadius cinnamomeus</i>  | Unknown   | Pair        | Indomalayan | [468]           | -- | -- | --    | --              |
| <i>Stachyris rodolphe</i>          | Unknown   | Pair        | Indomalayan | no source       | -- | -- | bbaa  | [477, 589, 613] |
| <i>S. ambigua</i>                  | Subspp    | Subspp      | Indomalayan | [648]           | -- | -- | --    | --              |
| <i>S. pyrrhops</i>                 | Pair      | Pair        | Palaearctic | [649, 671]      | -- | -- | --    | --              |
| <i>Alcippe poioicephala</i>        | Suspected | Cooperation | Indomalayan | [476]           | -- | -- | --    | [477, 589]      |
| <i>A. morrisonia</i>               | Unknown   | Pair        | Indomalayan | [648]           | -- | -- | --    | --              |
| <i>Pomatorhinus hypoleucos</i>     | Unknown   | Pair        | Indomalayan | [649]           | -- | -- | bbaba | [477, 589, 613] |
| <i>P. erythrocnemis</i>            | Subspp    | Subspp      | Indomalayan | --              | -- | -- | --    | --              |
| <i>P. erythrognys</i>              | Pair      | Pair        | Indomalayan | --              | -- | -- | --    | --              |
| <i>P. horsfieldii</i>              | Subspp    | Subspp      | Indomalayan | --              | -- | -- | --    | --              |
| <i>P. schisticeps</i>              | Pair      | Pair        | Indomalayan | --              | -- | -- | --    | --              |
| <i>P. montanus</i>                 | Unknown   | Pair        | Indomalayan | [99]            | -- | -- | --    | --              |
| <i>P. ruficollis</i>               | Pair      | Pair        | Indomalayan | [649]           | -- | -- | --    | --              |
| <i>P. ochraceiceps</i>             | Unknown   | Pair        | Indomalayan | --              | -- | -- | --    | --              |
| <i>P. ferruginosus</i>             | Unknown   | Pair        | Indomalayan | --              | -- | -- | --    | --              |
| <i>Xiphirhynchus superciliaris</i> | Unknown   | Pair        | Indomalayan | --              | -- | -- | --    | --              |
| <i>Spelaeornis caudatus</i>        | Unknown   | Pair        | Indomalayan | --              | -- | -- | --    | --              |
| <i>S. badeigularis</i>             | Unknown   | Pair        | Palaearctic | [455]           | -- | -- | --    | --              |
| <i>S. troglodytoides</i>           | Unknown   | Pair        | Palaearctic | [649]           | -- | -- | --    | --              |
| <i>S. formosus</i>                 | Unknown   | Pair        | Palaearctic | --              | -- | -- | --    | --              |
| <i>S. chocolatinus</i>             | Pair      | Pair        | Indomalayan | --              | -- | -- | --    | --              |
| <i>S. longicaudatus</i>            | Pair      | Pair        | Indomalayan | [455]           | -- | -- | --    | --              |
| <i>Stachyris rufifrons</i>         | Pair      | Pair        | Indomalayan | [649]           | -- | -- | --    | [477, 589]      |
| <i>S. ruficeps</i>                 | Pair      | Pair        | Palaearctic | --              | -- | -- | --    | --              |
| <i>S. chrysaea</i>                 | Unknown   | Pair        | Palaearctic | --              | -- | -- | --    | --              |
| <i>Macronous gularis</i>           | Suspected | Cooperation | Indomalayan | [468, 672, 673] | -- | -- | --    | --              |
| <i>M. flavicollis</i>              | Unknown   | Cooperation | Indomalayan | [642]           | -- | -- | --    | --              |

|                                 |             |             |             |           |    |    |       |                 |
|---------------------------------|-------------|-------------|-------------|-----------|----|----|-------|-----------------|
| <i>M. kelleyi</i>               | Unknown     | Cooperation | Indomalayan | [508]     | -- | -- | --    | --              |
| <i>M. striaticeps</i>           | Unknown     | Cooperation | Indomalayan | [468]     | -- | -- | --    | --              |
| <i>M. ptilosus</i>              | Unknown     | Pair        | Indomalayan | [99]      | -- | -- | --    | --              |
| <i>Micromacronus leytensis</i>  | Unknown     | Cooperation | Indomalayan | [468]     | -- | -- | --    | --              |
| <i>Timalia pileata</i>          | Pair        | Pair        | Indomalayan | [649]     | -- | -- | --    | --              |
| <i>Malacocincla abbotti</i>     | Pair        | Pair        | Indomalayan | [674]     | -- | -- | bbabb | [477, 589, 613] |
| <i>M. sepiarium</i>             | Unknown     | Pair        | Indomalayan | [99, 467] | -- | -- | --    | --              |
| <i>M. perspicillata</i>         | Unknown     | Pair        | Indomalayan | [455]     | -- | -- | --    | --              |
| <i>M. malaccensis</i>           | Unknown     | Pair        | Indomalayan | [99, 467] | -- | -- | --    | --              |
| <i>M. cinereiceps</i>           | Unknown     | Pair        | Indomalayan | [468]     | -- | -- | --    | --              |
| <i>Pellorneum tickelli</i>      | Pair        | Pair        | Indomalayan | [649]     | -- | -- | --    | --              |
| <i>P. pyrrogenys</i>            | Unknown     | Pair        | Indomalayan | [99]      | -- | -- | --    | --              |
| <i>P. albiventre</i>            | Pair        | Pair        | Indomalayan | [649]     | -- | -- | --    | --              |
| <i>P. palustre</i>              | Unknown     | Pair        | Indomalayan | [455]     | -- | -- | --    | --              |
| <i>P. ruficeps</i>              | Unknown     | Pair        | Indomalayan | [649]     | -- | -- | --    | --              |
| <i>P. fuscocapillum</i>         | Pair        | Pair        | Indomalayan | --        | -- | -- | --    | --              |
| <i>P. capistratum</i>           | Unknown     | Pair        | Indomalayan | [99, 467] | -- | -- | --    | --              |
| <i>Malacopteron magnirostre</i> | Unknown     | Pair        | Indomalayan | [99]      | -- | -- | --    | --              |
| <i>M. affine</i>                | Unknown     | Pair        | Indomalayan | [99, 467] | -- | -- | --    | --              |
| <i>M. cinereum</i>              | Unknown     | Pair        | Indomalayan | [99]      | -- | -- | --    | --              |
| <i>M. magnum</i>                | Unknown     | Pair        | Indomalayan | --        | -- | -- | --    | --              |
| <i>M. palawanense</i>           | Unknown     | Pair        | Indomalayan | [468]     | -- | -- | --    | --              |
| <i>M. albogulare</i>            | Unknown     | Pair        | Indomalayan | [99]      | -- | -- | --    | --              |
| <i>Illadopsis cleaveri</i>      | Pair        | Pair        | Africa      | [512]     | -- | -- | --    | --              |
| <i>I. albipectus</i>            | Unknown     | Pair        | Africa      | --        | -- | -- | --    | --              |
| <i>I. rufescens</i>             | Unknown     | Pair        | Africa      | --        | -- | -- | --    | --              |
| <i>I. puveli</i>                | Unknown     | Pair        | Africa      | --        | -- | -- | --    | --              |
| <i>I. rufipennis</i>            | Cooperation | Cooperation | Africa      | --        | -- | -- | --    | --              |
| <i>I. fulvescens</i>            | Unknown     | Pair        | Africa      | --        | -- | -- | --    | --              |
| <i>I. abyssinica</i>            | Pair        | Pair        | Africa      | --        | -- | -- | --    | --              |
| <i>Jabouilleia danjoui</i>      | Unknown     | Pair        | Indomalayan | [445]     | -- | -- | --    | --              |
| <i>Kenopia striata</i>          | Unknown     | Pair        | Indomalayan | [675]     | -- | -- | --    | --              |
| <i>Napothera macrodactyla</i>   | Unknown     | Pair        | Indomalayan | [445]     | -- | -- | --    | --              |
| <i>N. rufipectus</i>            | Unknown     | Pair        | Indomalayan | [642]     | -- | -- | --    | --              |
| <i>N. atrigularis</i>           | Unknown     | Pair        | Indomalayan | [99, 467] | -- | -- | --    | --              |
| <i>N. marmorata</i>             | Unknown     | Pair        | Indomalayan | [467]     | -- | -- | --    | --              |
| <i>N. crispifrons</i>           | Unknown     | Pair        | Indomalayan | [508]     | -- | -- | --    | --              |
| <i>N. brevicaudata</i>          | Pair        | Pair        | Indomalayan | [649]     | -- | -- | --    | --              |
| <i>N. crassa</i>                | Unknown     | Pair        | Indomalayan | [99]      | -- | -- | --    | --              |
| <i>N. rabori</i>                | Unknown     | Pair        | Indomalayan | [468]     | -- | -- | --    | --              |
| <i>N. epilepidota</i>           | Pair        | Pair        | Indomalayan | [649]     | -- | -- | --    | --              |
| <i>Gampsorhynchus rufulus</i>   | Unknown     | Pair        | Palaearctic | [513]     | -- | -- | --    | [477, 589]      |
| <i>Alcippe castaneiceps</i>     | Pair        | Pair        | Indomalayan | --        | -- | -- | --    | --              |

|                              |           |             |             |            |    |    |       |                 |
|------------------------------|-----------|-------------|-------------|------------|----|----|-------|-----------------|
| <i>Ptyrticus turdinus</i>    | Unknown   | Cooperation | Africa      | [512]      | -- | -- | bbabc | [477, 589, 613] |
| <i>Garrulax cinereifrons</i> | Suspected | Cooperation | Indomalayan | [455, 676] | -- | -- | bbb   | --              |
| <i>G. palliatus</i>          | Suspected | Cooperation | Indomalayan | [99, 675]  | -- | -- | --    | --              |
| <i>G. rufifrons</i>          | Unknown   | Cooperation | Indomalayan | [445]      | -- | -- | --    | --              |
| <i>G. perspicillatus</i>     | Unknown   | Cooperation | Palaearctic | [677]      | -- | -- | --    | --              |
| <i>G. albogularis</i>        | Suspected | Cooperation | Indomalayan | [513, 671] | -- | -- | --    | --              |
| <i>G. leucolophus</i>        | Suspected | Cooperation | Indomalayan | [678]      | -- | -- | --    | --              |
| <i>G. monileger</i>          | Pair      | Pair        | Indomalayan | [513]      | -- | -- | --    | --              |
| <i>G. pectoralis</i>         | Suspected | Cooperation | Indomalayan | --         | -- | -- | --    | --              |
| <i>G. lugubris</i>           | Suspected | Cooperation | Indomalayan | [99, 675]  | -- | -- | --    | --              |
| <i>G. calvus</i>             | Unknown   | Cooperation | Indomalayan | [99]       | -- | -- | --    | --              |
| <i>G. striatus</i>           | Pair      | Pair        | Indomalayan | [513]      | -- | -- | --    | --              |
| <i>G. strepitans</i>         | Suspected | Cooperation | Indomalayan | [679]      | -- | -- | --    | --              |
| <i>G. milleti</i>            | Unknown   | Cooperation | Indomalayan | [445]      | -- | -- | --    | --              |
| <i>G. maesi</i>              | Unknown   | Cooperation | Indomalayan | [508]      | -- | -- | --    | --              |
| <i>G. ruficollis</i>         | Pair      | Pair        | Indomalayan | [513]      | -- | -- | --    | --              |
| <i>G. nuchalis</i>           | Unknown   | Cooperation | Indomalayan | [445]      | -- | -- | --    | --              |
| <i>G. chinensis</i>          | Unknown   | Cooperation | Indomalayan | [513, 677] | -- | -- | --    | --              |
| <i>G. vassali</i>            | Unknown   | Cooperation | Indomalayan | [508]      | -- | -- | --    | --              |
| <i>G. galbanus</i>           | Suspected | Cooperation | Indomalayan | [680]      | -- | -- | --    | --              |
| <i>G. delesserti</i>         | Suspected | Cooperation | Indomalayan | [681]      | -- | -- | --    | --              |
| <i>G. gularis</i>            | Unknown   | Cooperation | Indomalayan | [513]      | -- | -- | --    | --              |
| <i>G. davidi</i>             | Unknown   | Cooperation | Indomalayan | [677]      | -- | -- | --    | --              |
| <i>G. sukatschewi</i>        | Pair      | Pair        | Palaearctic | [682]      | -- | -- | --    | --              |
| <i>G. cineraceus</i>         | Pair      | Pair        | Indomalayan | [513]      | -- | -- | --    | --              |
| <i>G. rufogularis</i>        | Pair      | Pair        | Indomalayan | --         | -- | -- | --    | --              |
| <i>G. lunulatus</i>          | Unknown   | Pair        | Palaearctic | [677]      | -- | -- | --    | --              |
| <i>G. bieti</i>              | Unknown   | Pair        | Palaearctic | [455]      | -- | -- | --    | --              |
| <i>G. maximus</i>            | Unknown   | Pair        | Indomalayan | [677]      | -- | -- | --    | --              |
| <i>G. ocellatus</i>          | Unknown   | Pair        | Indomalayan | --         | -- | -- | --    | --              |
| <i>G. caerulatus</i>         | Unknown   | Pair        | Indomalayan | [513]      | -- | -- | --    | --              |
| <i>G. poecilorhynchus</i>    | Unknown   | Pair        | Indomalayan | [648]      | -- | -- | --    | --              |
| <i>G. mitratus</i>           | Pair      | Pair        | Indomalayan | [99, 675]  | -- | -- | --    | --              |
| <i>G. merulinus</i>          | Unknown   | Pair        | Indomalayan | [513]      | -- | -- | --    | --              |
| <i>G. canorus</i>            | Unknown   | Pair        | Indomalayan | [648]      | -- | -- | --    | --              |
| <i>G. sannio</i>             | Pair      | Pair        | Indomalayan | [513]      | -- | -- | --    | --              |
| <i>G. cachinnans</i>         | Pair      | Pair        | Indomalayan | [683]      | -- | -- | --    | --              |
| <i>G. jerdoni</i>            | Pair      | Pair        | Indomalayan | [684, 685] | -- | -- | --    | --              |
| <i>G. lineatus</i>           | Pair      | Pair        | Indomalayan | [671, 684] | -- | -- | --    | --              |
| <i>G. virgatus</i>           | Unknown   | Pair        | Indomalayan | [513]      | -- | -- | --    | --              |
| <i>G. austeni</i>            | Unknown   | Pair        | Indomalayan | --         | -- | -- | --    | --              |
| <i>G. squamatus</i>          | Unknown   | Pair        | Indomalayan | --         | -- | -- | --    | --              |
| <i>G. subunicolor</i>        | Unknown   | Pair        | Indomalayan | --         | -- | -- | --    | --              |

|                             |             |             |             |       |    |    |    |            |
|-----------------------------|-------------|-------------|-------------|-------|----|----|----|------------|
| <i>G. elliotii</i>          | Unknown     | Pair        | Palaearctic | [648] | -- | -- | -- | --         |
| <i>G. variegatus</i>        | Pair        | Pair        | Indomalayan | [513] | -- | -- | -- | --         |
| <i>G. henrici</i>           | Pair        | Pair        | Indomalayan | --    | -- | -- | -- | --         |
| <i>G. affinis</i>           | Pair        | Pair        | Indomalayan | --    | -- | -- | -- | --         |
| <i>G. morrisonianus</i>     | Unknown     | Pair        | Palaearctic | [677] | -- | -- | -- | --         |
| <i>G. erythrocephalus</i>   | Pair        | Pair        | Indomalayan | [513] | -- | -- | -- | --         |
| <i>G. yersini</i>           | Unknown     | Pair        | Indomalayan | [455] | -- | -- | -- | --         |
| <i>G. formosus</i>          | Unknown     | Pair        | Indomalayan | [508] | -- | -- | -- | --         |
| <i>G. milnei</i>            | Suspected   | Cooperation | Palaearctic | [686] | -- | -- | -- | --         |
| <i>Liocichla phoenicea</i>  | Pair        | Pair        | Indomalayan | [513] | -- | -- | -- | --         |
| <i>L. omeiensis</i>         | Unknown     | Pair        | Palaearctic | [455] | -- | -- | -- | --         |
| <i>L. steerii</i>           | Unknown     | Pair        | Palaearctic | [648] | -- | -- | -- | --         |
| <i>Turdoides nipalensis</i> | Unknown     | Cooperation | Palaearctic | [649] | -- | -- | -- | [477, 589] |
| <i>T. altirostris</i>       | Cooperation | Cooperation | Palaearctic | [511] | -- | -- | -- | --         |
| <i>T. caudatus</i>          | Cooperation | Cooperation | Indomalayan | [687] | -- | -- | -- | --         |
| <i>T. earlei</i>            | Cooperation | Cooperation | Indomalayan | [649] | -- | -- | -- | --         |
| <i>T. gularis</i>           | Unknown     | Cooperation | Indomalayan | [508] | -- | -- | -- | --         |
| <i>T. longirostris</i>      | Unknown     | Pair        | Indomalayan | [455] | -- | -- | -- | --         |
| <i>T. malcolmi</i>          | Cooperation | Cooperation | Indomalayan | [649] | -- | -- | -- | --         |
| <i>T. squamiceps</i>        | Cooperation | Cooperation | Palaearctic | [688] | -- | -- | -- | --         |
| <i>T. fulvus</i>            | Cooperation | Cooperation | Africa      | [511] | -- | -- | -- | --         |
| <i>T. aylmeri</i>           | Cooperation | Cooperation | Africa      | [512] | -- | -- | -- | --         |
| <i>T. rubiginosus</i>       | Cooperation | Cooperation | Africa      | [689] | -- | -- | -- | --         |
| <i>T. subrufus</i>          | Unknown     | Cooperation | Indomalayan | [649] | -- | -- | -- | --         |
| <i>T. striatus</i>          | Cooperation | Cooperation | Indomalayan | [690] | -- | -- | -- | --         |
| <i>T. rufescens</i>         | Suspected   | Cooperation | Indomalayan | [649] | -- | -- | -- | --         |
| <i>T. affinis</i>           | Cooperation | Cooperation | Indomalayan | --    | -- | -- | -- | --         |
| <i>T. reinwardtii</i>       | Cooperation | Cooperation | Africa      | [512] | -- | -- | -- | --         |
| <i>T. tenebrosus</i>        | Cooperation | Cooperation | Africa      | --    | -- | -- | -- | --         |
| <i>T. melanops</i>          | Cooperation | Cooperation | Africa      | --    | -- | -- | -- | --         |
| <i>T. squamulatus</i>       | Suspected   | Cooperation | Africa      | --    | -- | -- | -- | --         |
| <i>T. leucopygius</i>       | Suspected   | Cooperation | Africa      | --    | -- | -- | -- | --         |
| <i>T. hartlaubii</i>        | Cooperation | Cooperation | Africa      | --    | -- | -- | -- | --         |
| <i>T. bicolor</i>           | Cooperation | Cooperation | Africa      | --    | -- | -- | -- | --         |
| <i>T. sharpei</i>           | Cooperation | Cooperation | Africa      | --    | -- | -- | -- | --         |
| <i>T. hypoleucus</i>        | Cooperation | Cooperation | Africa      | --    | -- | -- | -- | --         |
| <i>T. hindei</i>            | Cooperation | Cooperation | Africa      | --    | -- | -- | -- | --         |
| <i>T. plebejus</i>          | Suspected   | Cooperation | Africa      | --    | -- | -- | -- | --         |
| <i>T. leucocephalus</i>     | Cooperation | Cooperation | Africa      | --    | -- | -- | -- | --         |
| <i>T. jardinei</i>          | Cooperation | Cooperation | Africa      | --    | -- | -- | -- | --         |
| <i>T. gymnogenys</i>        | Cooperation | Cooperation | Africa      | --    | -- | -- | -- | --         |
| <i>Babax lanceolatus</i>    | Unknown     | Cooperation | Palaearctic | [649] | -- | -- | -- | --         |
| <i>B. waddelli</i>          | Unknown     | Cooperation | Palaearctic | --    | -- | -- | -- | --         |



|                               |           |             |             |           |    |    |              |    |
|-------------------------------|-----------|-------------|-------------|-----------|----|----|--------------|----|
| <i>B. koslowi</i>             | Unknown   | Cooperation | Indomalayan | [445]     | -- | -- | --           | -- |
| <i>Leiothrix argentauris</i>  | Pair      | Pair        | Indomalayan | [513]     | -- | -- | --           | -- |
| <i>L. lutea</i>               | Pair      | Pair        | Indomalayan | [691]     | -- | -- | --           | -- |
| <i>Cutia nipalensis</i>       | Unknown   | Pair        | Palaearctic | [513]     | -- | -- | --           | -- |
| <i>Actinodura egertoni</i>    | Pair      | Pair        | Indomalayan | --        | -- | -- | --           | -- |
| <i>A. ramsayi</i>             | Unknown   | Pair        | Indomalayan | [508]     | -- | -- | --           | -- |
| <i>A. nipalensis</i>          | Unknown   | Pair        | Indomalayan | [513]     | -- | -- | --           | -- |
| <i>A. waldeni</i>             | Unknown   | Pair        | Indomalayan | --        | -- | -- | --           | -- |
| <i>A. souliei</i>             | Unknown   | Pair        | Indomalayan | [508]     | -- | -- | --           | -- |
| <i>A. morrisoniana</i>        | Unknown   | Pair        | Palaearctic | [648]     | -- | -- | --           | -- |
| <i>Minla cyanouroptera</i>    | Unknown   | Pair        | Indomalayan | [513]     | -- | -- | --           | -- |
| <i>M. strigula</i>            | Unknown   | Pair        | Indomalayan | --        | -- | -- | --           | -- |
| <i>M. ignotincta</i>          | Unknown   | Pair        | Indomalayan | --        | -- | -- | --           | -- |
| <i>Heterophasia annectens</i> | Unknown   | Pair        | Indomalayan | --        | -- | -- | --           | -- |
| <i>H. capistrata</i>          | Pair      | Pair        | Palaearctic | [671]     | -- | -- | --           | -- |
| <i>H. gracilis</i>            | Pair      | Pair        | Palaearctic | [513]     | -- | -- | --           | -- |
| <i>H. melanoleuca</i>         | Unknown   | Pair        | Indomalayan | [508]     | -- | -- | --           | -- |
| <i>H. auricularis</i>         | Unknown   | Pair        | Palaearctic | [648]     | -- | -- | --           | -- |
| <i>H. pulchella</i>           | Unknown   | Pair        | Palaearctic | [513]     | -- | -- | --           | -- |
| <i>H. picaoides</i>           | Unknown   | Pair        | Palaearctic | --        | -- | -- | --           | -- |
| <i>Stachyris grammiceps</i>   | Unknown   | Pair        | Indomalayan | [445]     | -- | -- | Polyphyletic | -- |
| <i>S. herberti</i>            | Unknown   | Pair        | Indomalayan | [692]     | -- | -- | --           | -- |
| <i>S. nigriceps</i>           | Pair      | Pair        | Palaearctic | [99, 649] | -- | -- | --           | -- |
| <i>S. poliocephala</i>        | Unknown   | Pair        | Indomalayan | [99]      | -- | -- | --           | -- |
| <i>S. oglei</i>               | Unknown   | Pair        | Palaearctic | [455]     | -- | -- | --           | -- |
| <i>S. striolata</i>           | Unknown   | Pair        | Indomalayan | [467]     | -- | -- | --           | -- |
| <i>S. leucotis</i>            | Unknown   | Pair        | Indomalayan | [99]      | -- | -- | --           | -- |
| <i>S. nigricollis</i>         | Unknown   | Pair        | Indomalayan | [99, 467] | -- | -- | --           | -- |
| <i>S. thoracica</i>           | Unknown   | Cooperation | Indomalayan | [642]     | -- | -- | --           | -- |
| <i>S. maculata</i>            | Unknown   | Cooperation | Indomalayan | [99, 467] | -- | -- | --           | -- |
| <i>S. erythroptera</i>        | Suspected | Cooperation | Indomalayan | [99, 675] | -- | -- | --           | -- |
| <i>S. melanothorax</i>        | Unknown   | Cooperation | Indomalayan | [642]     | -- | -- | --           | -- |
| <i>Alcippe variegaticeps</i>  | Pair      | Pair        | Indomalayan | [455]     | -- | -- | --           | -- |
| <i>A. cinerea</i>             | Unknown   | Pair        | Indomalayan | [513]     | -- | -- | --           | -- |
| <i>A. vinipectus</i>          | Unknown   | Pair        | Palaearctic | --        | -- | -- | --           | -- |
| <i>A. striaticollis</i>       | Unknown   | Pair        | Palaearctic | --        | -- | -- | --           | -- |
| <i>A. ruficapilla</i>         | Unknown   | Pair        | Palaearctic | [648]     | -- | -- | --           | -- |
| <i>A. ludlowi</i>             | Unknown   | Pair        | Palaearctic | --        | -- | -- | --           | -- |
| <i>A. rufogularis</i>         | Pair      | Pair        | Palaearctic | [513]     | -- | -- | --           | -- |
| <i>A. brunnea</i>             | Pair      | Pair        | Palaearctic | --        | -- | -- | --           | -- |
| <i>A. dubia</i>               | Unknown   | Pair        | Indomalayan | [508]     | -- | -- | --           | -- |
| <i>A. brunneicauda</i>        | Unknown   | Pair        | Indomalayan | [99]      | -- | -- | --           | -- |
| <i>A. pyrrhoptera</i>         | Unknown   | Cooperation | Indomalayan | [642]     | -- | -- | --           | -- |

|                                  |           |             |             |       |    |    |          |                 |
|----------------------------------|-----------|-------------|-------------|-------|----|----|----------|-----------------|
| <i>A. peracensis</i>             | Unknown   | Pair        | Indomalayan | [467] | -- | -- | --       | --              |
| <i>A. nipalensis</i>             | Pair      | Pair        | Indomalayan | [513] | -- | -- | --       | --              |
| <i>Rhopophilus pekinensis</i>    | Unknown   | Pair        | Palaearctic | [648] | -- | -- | Untested | [613]           |
| <i>Graminicola bengalensis</i>   | Unknown   | Pair        | Indomalayan | [635] | -- | -- | --       | --              |
| <i>Trichastoma rostratum</i>     | Unknown   | Pair        | Indomalayan | [445] | -- | -- | --       | [477, 589, 613] |
| <i>T. celebense</i>              | Unknown   | Pair        | Indomalayan | [446] | -- | -- | --       | --              |
| <i>T. bicolor</i>                | Unknown   | Pair        | Indomalayan | [99]  | -- | -- | --       | --              |
| <i>T. woodi</i>                  | Unknown   | Pair        | Indomalayan | [468] | -- | -- | --       | --              |
| <i>Rimator malacoptilus</i>      | Pair      | Pair        | Indomalayan | [649] | -- | -- | --       | --              |
| <i>Ptilocichla leucogrammica</i> | Unknown   | Pair        | Indomalayan | [99]  | -- | -- | --       | --              |
| <i>P. mindanensis</i>            | Unknown   | Pair        | Indomalayan | [468] | -- | -- | --       | --              |
| <i>P. falcata</i>                | Unknown   | Pair        | Indomalayan | --    | -- | -- | --       | --              |
| <i>Pnoepyga albiventer</i>       | Pair      | Pair        | Indomalayan | [649] | -- | -- | --       | --              |
| <i>P. immaculata</i>             | Unknown   | Pair        | Indomalayan | --    | -- | -- | --       | --              |
| <i>P. pusilla</i>                | Unknown   | Pair        | Indomalayan | --    | -- | -- | --       | --              |
| <i>Sphenocichla humei</i>        | Unknown   | Pair        | Indomalayan | --    | -- | -- | --       | --              |
| <i>Dumetia hyperythra</i>        | Unknown   | Cooperation | Indomalayan | --    | -- | -- | --       | [477, 589]      |
| <i>Rhopocichla atriceps</i>      | Suspected | Cooperation | Indomalayan | --    | -- | -- | --       | --              |
| <i>Lioptilus nigricapillus</i>   | Pair      | Pair        | Africa      | [512] | -- | -- | --       | --              |
| <i>Kupeornis gilberti</i>        | Unknown   | Cooperation | Africa      | --    | -- | -- | --       | --              |
| <i>K. rufocinctus</i>            | Unknown   | Cooperation | Africa      | --    | -- | -- | --       | --              |
| <i>K. chapini</i>                | Unknown   | Cooperation | Africa      | --    | -- | -- | --       | --              |
| <i>Parophasma galinieri</i>      | Unknown   | Cooperation | Africa      | --    | -- | -- | --       | --              |
| <i>Phyllanthus atripennis</i>    | Suspected | Cooperation | Africa      | --    | -- | -- | --       | --              |
| <i>Crocias langbianis</i>        | Unknown   | Pair        | Indomalayan | [455] | -- | -- | --       | --              |
| <i>C. albonotatus</i>            | Unknown   | Pair        | Indomalayan | [445] | -- | -- | --       | --              |
| <i>Myzornis pyrrhoura</i>        | Unknown   | Pair        | Indomalayan | [513] | -- | -- | --       | --              |

**Sylvioidea: Acrocephalidae**

|                                 |             |             |             |            |                |       |
|---------------------------------|-------------|-------------|-------------|------------|----------------|-------|
| <i>Acrocephalus melanopogon</i> | Cooperation | Cooperation | Palaearctic | [693]      | bbbbbbbbbbbbbb | [613] |
| <i>A. paludicola</i>            | Female only | Female only | Palaearctic | [643]      | --             | --    |
| <i>A. schoenobaenus</i>         | Pair        | Pair        | Palaearctic | --         | --             | --    |
| <i>A. sorghophilus</i>          | Unknown     | Pair        | Palaearctic | [455]      | --             | --    |
| <i>A. bistrigiceps</i>          | Pair        | Pair        | Palaearctic | [694, 695] | --             | --    |
| <i>A. agricola</i>              | Pair        | Pair        | Palaearctic | [643]      | --             | --    |
| <i>A. concinens</i>             | Pair        | Pair        | Palaearctic | [635]      | --             | --    |
| <i>A. scirpaceus</i>            | Pair        | Pair        | Palaearctic | [643]      | --             | --    |
| <i>A. baeticatus</i>            | Cooperation | Cooperation | Africa      | [696]      | --             | --    |
| <i>A. dumetorum</i>             | Pair        | Pair        | Palaearctic | [643]      | --             | --    |
| <i>A. palustris</i>             | Pair        | Pair        | Palaearctic | --         | --             | --    |
| <i>A. arundinaceus</i>          | Pair        | Pair        | Palaearctic | --         | --             | --    |
| <i>A. stentoreus</i>            | Pair        | Pair        | Palaearctic | --         | --             | --    |
| <i>A. griseldis</i>             | Pair        | Pair        | Palaearctic | [697]      | --             | --    |
| <i>A. australis</i>             | Pair        | Pair        | Australia   | [698]      | --             | --    |

|                              |             |             |             |           |    |    |
|------------------------------|-------------|-------------|-------------|-----------|----|----|
| <i>A. syrinx</i>             | Unknown     | Pair        | Indomalayan | no source | -- | -- |
| <i>A. rehsei</i>             | Unknown     | Pair        | Indomalayan | --        | -- | -- |
| <i>A. familiaris</i>         | Pair        | Pair        | Indomalayan | [699]     | -- | -- |
| <i>A. aequinoctialis</i>     | Pair        | Pair        | Australia   | [700]     | -- | -- |
| <i>A. caffer</i>             | Unknown     | Pair        | Australia   | [445]     | -- | -- |
| <i>A. mendanae</i>           | Unknown     | Pair        | Australia   | no source | -- | -- |
| <i>A. atyphus</i>            | Unknown     | Pair        | Australia   | --        | -- | -- |
| <i>A. kerearako</i>          | Unknown     | Pair        | Australia   | [445]     | -- | -- |
| <i>A. rimatarae</i>          | Unknown     | Pair        | Australia   | no source | -- | -- |
| <i>A. vaughani</i>           | Unknown     | Pair        | Australia   | --        | -- | -- |
| <i>A. taiti</i>              | Cooperation | Cooperation | Australia   | [701]     | -- | -- |
| <i>A. rufescens</i>          | Pair        | Pair        | Africa      | [524]     | -- | -- |
| <i>A. brevipennis</i>        | Unknown     | Pair        | Africa      | [445]     | -- | -- |
| <i>A. gracilirostris</i>     | Unknown     | Pair        | Africa      | [524]     | -- | -- |
| <i>A. newtoni</i>            | Pair        | Pair        | Africa      | [525]     | -- | -- |
| <i>A. aedon</i>              | Pair        | Pair        | Paelearctic | [643]     | -- | -- |
| <i>A. rodericanus</i>        | Pair        | Pair        | Africa      | [702]     | -- | -- |
| <i>A. sechellensis</i>       | Cooperation | Cooperation | Africa      | [703]     | -- | -- |
| <i>Hippolais caligata</i>    | Pair        | Pair        | Paelearctic | [643]     | -- | -- |
| <i>H. rama</i>               | Subspp      | Subspp      | Paelearctic | --        | -- | -- |
| <i>H. pallida</i>            | Pair        | Pair        | Paelearctic | --        | -- | -- |
| <i>H. languida</i>           | Pair        | Pair        | Paelearctic | --        | -- | -- |
| <i>H. olivetorum</i>         | Pair        | Pair        | Paelearctic | --        | -- | -- |
| <i>H. polyglotta</i>         | Pair        | Pair        | Paelearctic | --        | -- | -- |
| <i>H. icterina</i>           | Pair        | Pair        | Paelearctic | [702]     | -- | -- |
| <i>Chloropeta natalensis</i> | Pair        | Pair        | Africa      | [524]     | -- | -- |
| <i>C. similis</i>            | Pair        | Pair        | Africa      | --        | -- | -- |
| <i>C. gracilirostris</i>     | Unknown     | Pair        | Africa      | --        | -- | -- |

**Sylvioidea: Cettidae**

|                               |             |             |             |            |                 |       |
|-------------------------------|-------------|-------------|-------------|------------|-----------------|-------|
| <i>Tesia castaneocoronata</i> | Pair        | Pair        | Indomalayan | [635]      | bbdbbbbbbabbabb | [613] |
| <i>T. olivea</i>              | Unknown     | Pair        | Indomalayan | --         | --              | --    |
| <i>T. cyaniventer</i>         | Unknown     | Pair        | Indomalayan | --         | --              | --    |
| <i>T. superciliaris</i>       | Unknown     | Pair        | Indomalayan | [642]      | --              | --    |
| <i>T. everetti</i>            | Unknown     | Pair        | Indomalayan | [446]      | --              | --    |
| <i>Urosphena subulata</i>     | Unknown     | Cooperation | Indomalayan | --         | --              | --    |
| <i>U. whiteheadi</i>          | Unknown     | Cooperation | Indomalayan | [99]       | --              | --    |
| <i>U. squameiceps</i>         | Cooperation | Cooperation | Paelearctic | [704, 705] | --              | --    |
| <i>Cettia pallidipes</i>      | Unknown     | Pair        | Paelearctic | [635]      | --              | --    |
| <i>C. canturians</i>          | Unknown     | Pair        | Paelearctic | [648]      | --              | --    |
| <i>C. diphone</i>             | Female only | Female only | Paelearctic | [706-708]  | --              | --    |
| <i>C. seebohmi</i>            | Unknown     | Pair        | Indomalayan | [468]      | --              | --    |
| <i>C. annae</i>               | Unknown     | Pair        | Indomalayan | no source  | --              | --    |
| <i>C. parens</i>              | Unknown     | Pair        | Australia   | --         | --              | --    |

|                               |         |      |             |       |    |    |
|-------------------------------|---------|------|-------------|-------|----|----|
| <i>C. ruficapilla</i>         | Pair    | Pair | Australia   | [450] | -- | -- |
| <i>C. fortipes</i>            | Unknown | Pair | Australia   | [445] | -- | -- |
| <i>C. vulcania</i>            | Pair    | Pair | Indomalayan | [635] | -- | -- |
| <i>C. carolinae</i>           | Unknown | Pair | Indomalayan | [468] | -- | -- |
| <i>C. major</i>               | Unknown | Pair | Paelearctic | [635] | -- | -- |
| <i>C. flavolivacea</i>        | Unknown | Pair | Paelearctic | --    | -- | -- |
| <i>C. acanthizoides</i>       | Unknown | Pair | Paelearctic | --    | -- | -- |
| <i>C. brunneifrons</i>        | Unknown | Pair | Paelearctic | --    | -- | -- |
| <i>C. cetti</i>               | Pair    | Pair | Paelearctic | [643] | -- | -- |
| <i>Tickellia hodgsoni</i>     | Unknown | Pair | Indomalayan | [635] | -- | -- |
| <i>Abroscopus albogularis</i> | Pair    | Pair | Paelearctic | --    | -- | -- |
| <i>A. schisticeps</i>         | Unknown | Pair | Paelearctic | --    | -- | -- |
| <i>A. superciliaris</i>       | Pair    | Pair | Indomalayan | --    | -- | -- |

**Sylvioidea: Malagasy warblers**

|                                   |           |             |        |       |           |            |
|-----------------------------------|-----------|-------------|--------|-------|-----------|------------|
| <i>Thamnornis chloropetoides</i>  | Unknown   | Pair        | Africa | [525] | bbdbbbbbb | [591, 709] |
| <i>Randia pseudozosterops</i>     | Unknown   | Pair        | Africa | --    | --        | --         |
| <i>Harterula flavoviridis</i>     | Unknown   | Pair        | Africa | --    | --        | --         |
| <i>Oxylabes madagascariensis</i>  | Unknown   | Pair        | Africa | --    | --        | --         |
| <i>Crossleyia xanthophrys</i>     | Unknown   | Pair        | Africa | --    | --        | --         |
| <i>Bernieria madagascariensis</i> | Unknown   | Pair        | Africa | [636] | --        | --         |
| <i>Xanthomixis zosterops</i>      | Suspected | Cooperation | Africa | --    | --        | --         |
| <i>X. apperti</i>                 | Unknown   | Cooperation | Africa | --    | --        | --         |
| <i>X. tenebrosus</i>              | Unknown   | Cooperation | Africa | --    | --        | --         |
| <i>X. cinereiceps</i>             | Suspected | Cooperation | Africa | --    | --        | --         |

**Sylvioidea: Megaluridae**

|                              |         |        |             |       |           |                 |
|------------------------------|---------|--------|-------------|-------|-----------|-----------------|
| <i>Bradypterus baboecala</i> | Pair    | Pair   | Africa      | [524] | bbdbbbbbb | [433, 591, 613] |
| <i>B. grandis</i>            | Pair    | Pair   | Africa      | --    | --        | --              |
| <i>B. carpalis</i>           | Unknown | Pair   | Africa      | --    | --        | --              |
| <i>B. graueri</i>            | Unknown | Pair   | Africa      | --    | --        | --              |
| <i>B. alfredi</i>            | Unknown | Pair   | Africa      | --    | --        | --              |
| <i>B. sylvaticus</i>         | Pair    | Pair   | Africa      | --    | --        | --              |
| <i>B. lopezi</i>             | Pair    | Pair   | Africa      | --    | --        | --              |
| <i>B. mariae</i>             | Subspp  | Subspp | Africa      | --    | --        | --              |
| <i>B. barratti</i>           | Pair    | Pair   | Africa      | --    | --        | --              |
| <i>B. cinnamomeus</i>        | Pair    | Pair   | Africa      | --    | --        | --              |
| <i>B. thoracicus</i>         | Unknown | Pair   | Paelearctic | [635] | --        | --              |
| <i>B. major</i>              | Unknown | Pair   | Paelearctic | --    | --        | --              |
| <i>B. tacsanowskii</i>       | Pair    | Pair   | Paelearctic | [710] | --        | --              |
| <i>B. luteoventris</i>       | Pair    | Pair   | Paelearctic | [635] | --        | --              |
| <i>B. seebohmi</i>           | Unknown | Pair   | Indomalayan | [468] | --        | --              |
| <i>B. palliseri</i>          | Pair    | Pair   | Indomalayan | [635] | --        | --              |
| <i>B. caudatus</i>           | Unknown | Pair   | Indomalayan | [468] | --        | --              |
| <i>B. accentor</i>           | Unknown | Pair   | Indomalayan | [99]  | --        | --              |

|                                   |             |             |             |            |                 |       |
|-----------------------------------|-------------|-------------|-------------|------------|-----------------|-------|
| <i>B. castaneus</i>               | Unknown     | Pair        | Indomalayan | [446]      | --              | --    |
| <i>Amphilais seebohmi</i>         | Unknown     | Pair        | Africa      | [525]      | --              | --    |
| <i>Megalurus pryeri</i>           | Pair        | Pair        | Palaearctic | [455]      | --              | --    |
| <i>M. timoriensis</i>             | Pair        | Pair        | Australia   | [698]      | --              | --    |
| <i>M. palustris</i>               | Unknown     | Pair        | Indomalayan | [635]      | --              | --    |
| <i>M. albolimbatus</i>            | Unknown     | Pair        | Australia   | [434]      | --              | --    |
| <i>M. gramineus</i>               | Pair        | Pair        | Australia   | [698]      | --              | --    |
| <i>M. punctatus</i>               | Pair        | Pair        | Australia   | [475]      | --              | --    |
| <i>Cincloramphus cruralis</i>     | Female only | Female only | Australia   | [711]      | --              | --    |
| <i>C. mathewsi</i>                | Pair        | Pair        | Australia   | --         | --              | --    |
| <i>Eremiornis carteri</i>         | Pair        | Pair        | Australia   | [698]      | --              | --    |
| <i>Buettikofarella bivittata</i>  | Unknown     | Pair        | Australia   | [445]      | --              | --    |
| <i>Megalurulus mariei</i>         | Unknown     | Pair        | Australia   | --         | --              | --    |
| <i>M. grosvenori</i>              | Unknown     | Pair        | Australia   | [449]      | --              | --    |
| <i>M. llaneae</i>                 | Unknown     | Pair        | Australia   | [125, 445] | --              | --    |
| <i>M. whitneyi</i>                | Unknown     | Pair        | Australia   | [434]      | --              | --    |
| <i>M. rubiginosus</i>             | Unknown     | Pair        | Australia   | --         | --              | --    |
| <i>Trichocichla rufa</i>          | Unknown     | Pair        | Australia   | [450]      | --              | --    |
| <i>Chaetornis striatus</i>        | Unknown     | Pair        | Indomalayan | [455]      | --              | --    |
| <i>Schoenicola brevirostris</i>   | Pair        | Pair        | Africa      | [524]      | --              | --    |
| <i>S. platyura</i>                | Pair        | Pair        | Indomalayan | [455]      | --              | --    |
| <i>Locustella lanceolata</i>      | Pair        | Pair        | Palaearctic | [643]      | --              | --    |
| <i>L. naevia</i>                  | Pair        | Pair        | Palaearctic | --         | --              | --    |
| <i>L. certhiola</i>               | Pair        | Pair        | Palaearctic | --         | --              | --    |
| <i>L. ochotensis</i>              | Pair        | Pair        | Palaearctic | [712]      | --              | --    |
| <i>L. pleskei</i>                 | Pair        | Pair        | Palaearctic | [455]      | --              | --    |
| <i>L. fluviatilis</i>             | Pair        | Pair        | Palaearctic | [643]      | --              | --    |
| <i>L. luscinioides</i>            | Pair        | Pair        | Palaearctic | --         | --              | --    |
| <i>L. fasciolata</i>              | Pair        | Pair        | Palaearctic | --         | --              | --    |
| <b>Sylvioidea: Phylloscopidae</b> |             |             |             |            |                 |       |
| <i>Phylloscopus laetus</i>        | Pair        | Pair        | Africa      | [524]      | bbdbbbbbbabbabb | [613] |
| <i>P. laurae</i>                  | Unknown     | Pair        | Africa      | --         | --              | --    |
| <i>P. ruficapillus</i>            | Pair        | Pair        | Africa      | --         | --              | --    |
| <i>P. herberti</i>                | Unknown     | Pair        | Africa      | --         | --              | --    |
| <i>P. budongoensis</i>            | Unknown     | Pair        | Africa      | --         | --              | --    |
| <i>P. umbrovirens</i>             | Pair        | Pair        | Africa      | --         | --              | --    |
| <i>P. trochilus</i>               | Occasional  | Pair        | Palaearctic | [643, 713] | --              | --    |
| <i>P. collybita</i>               | Pair        | Pair        | Palaearctic | [643]      | --              | --    |
| <i>P. lorenzii</i>                | Pair        | Pair        | Palaearctic | --         | --              | --    |
| <i>P. neglectus</i>               | Unknown     | Pair        | Palaearctic | [635]      | --              | --    |
| <i>P. bonelli</i>                 | Occasional  | Pair        | Palaearctic | [643]      | --              | --    |
| <i>P. sibilatrix</i>              | Pair        | Pair        | Palaearctic | --         | --              | --    |
| <i>P. fuscatus</i>                | Pair        | Pair        | Palaearctic | [714]      | --              | --    |

|                                  |         |        |             |            |                |    |               |       |
|----------------------------------|---------|--------|-------------|------------|----------------|----|---------------|-------|
| <i>P. fulgivent</i>              | Unknown | Pair   | Palaearctic | [635]      | --             | -- |               |       |
| <i>P. affinis</i>                | Pair    | Pair   | Palaearctic | --         | --             | -- |               |       |
| <i>P. subaffinis</i>             | Pair    | Pair   | Palaearctic | [648]      | --             | -- |               |       |
| <i>P. griseolus</i>              | Pair    | Pair   | Palaearctic | --         | --             | -- |               |       |
| <i>P. armandii</i>               | Unknown | Pair   | Palaearctic | --         | --             | -- |               |       |
| <i>P. schwarzi</i>               | Unknown | Pair   | Palaearctic | --         | --             | -- |               |       |
| <i>P. pulcher</i>                | Pair    | Pair   | Palaearctic | [715]      | --             | -- |               |       |
| <i>P. maculipennis</i>           | Unknown | Pair   | Palaearctic | [635]      | --             | -- |               |       |
| <i>P. proregulus</i>             | Pair    | Pair   | Palaearctic | [715]      | --             | -- |               |       |
| <i>P. chloronotus</i>            | Subspp  | Subspp | Palaearctic | no source  | --             | -- |               |       |
| <i>P. subviridis</i>             | Unknown | Pair   | Palaearctic | [635]      | --             | -- |               |       |
| <i>P. inornatus</i>              | Pair    | Pair   | Palaearctic | [643, 715] | --             | -- |               |       |
| <i>P. borealis</i>               | Pair    | Pair   | Palaearctic | [643]      | --             | -- |               |       |
| <i>P. trochiloides</i>           | Pair    | Pair   | Palaearctic | [643, 715] | --             | -- |               |       |
| <i>P. tenellipes</i>             | Pair    | Pair   | Palaearctic | [697]      | --             | -- |               |       |
| <i>P. borealoides</i>            | Pair    | Pair   | Palaearctic | [643]      | --             | -- |               |       |
| <i>P. magnirostris</i>           | Pair    | Pair   | Palaearctic | [715]      | --             | -- |               |       |
| <i>P. tytleri</i>                | Pair    | Pair   | Palaearctic | --         | --             | -- |               |       |
| <i>P. occipitalis</i>            | Pair    | Pair   | Indomalayan | --         | --             | -- |               |       |
| <i>P. coronatus</i>              | Pair    | Pair   | Palaearctic | [697]      | --             | -- |               |       |
| <i>P. ijimae</i>                 | Pair    | Pair   | Palaearctic | [455]      | --             | -- |               |       |
| <i>P. reguloides</i>             | Unknown | Pair   | Indomalayan | [648]      | --             | -- |               |       |
| <i>P. davisoni</i>               | Pair    | Pair   | Indomalayan | [715]      | --             | -- |               |       |
| <i>P. cantator</i>               | Pair    | Pair   | Palaearctic | [635]      | --             | -- |               |       |
| <i>P. ricketti</i>               | Unknown | Pair   | Palaearctic | [648]      | --             | -- |               |       |
| <i>P. olivaceus</i>              | Unknown | Pair   | Indomalayan | [468]      | --             | -- |               |       |
| <i>P. cebuensis</i>              | Unknown | Pair   | Indomalayan | --         | --             | -- |               |       |
| <i>P. trivirgatus</i>            | Unknown | Pair   | Indomalayan | --         | --             | -- |               |       |
| <i>P. sarasinorum</i>            | Unknown | Pair   | Indomalayan | [446]      | --             | -- |               |       |
| <i>P. presbytes</i>              | Unknown | Pair   | Indomalayan | --         | --             | -- |               |       |
| <i>P. poliocephalus</i>          | Unknown | Pair   | Indomalayan | --         | --             | -- |               |       |
| <i>P. makirensis</i>             | Unknown | Pair   | Australia   | no source  | --             | -- |               |       |
| <i>P. amoenus</i>                | Unknown | Pair   | Australia   | [445]      | --             | -- |               |       |
| <i>Seicercus burkii</i>          | Pair    | Pair   | Indomalayan | [635]      | --             | -- |               |       |
| <i>S. xanthoschistos</i>         | Pair    | Pair   | Palaearctic | --         | --             | -- |               |       |
| <i>S. affinis</i>                | Pair    | Pair   | Palaearctic | --         | --             | -- |               |       |
| <i>S. polioegenys</i>            | Pair    | Pair   | Indomalayan | --         | --             | -- |               |       |
| <i>S. castaniceps</i>            | Pair    | Pair   | Indomalayan | --         | --             | -- |               |       |
| <i>S. montis</i>                 | Unknown | Pair   | Indomalayan | [467, 468] | --             | -- |               |       |
| <i>S. grammiceps</i>             | Unknown | Pair   | Indomalayan | [642]      | --             | -- |               |       |
| <b>Passerida: incertae sedis</b> |         |        |             |            |                |    |               |       |
| <i>Phyllolais pulchella</i>      | Unknown | Pair   | Africa      | [524]      | bbdbbbbbbabbcb |    | 0 a - African | [524] |
| <i>Poliolais lopezi</i>          | Pair    | Pair   | Africa      | --         | --             | -- | --            | --    |

|                                 |             |             |        |       |    |    |                 |            |
|---------------------------------|-------------|-------------|--------|-------|----|----|-----------------|------------|
| <i>Graueria vittata</i>         | Unknown     | Pair        | Africa | --    | -- | -- | --              | --         |
| <i>Eremomela icteropygialis</i> | Unknown     | Cooperation | Africa | --    | -- | -- | --              | --         |
| <i>E. salvadorii</i>            | Unknown     | Cooperation | Africa | --    | -- | -- | --              | --         |
| <i>E. flavicrissalis</i>        | Unknown     | Cooperation | Africa | --    | -- | -- | --              | --         |
| <i>E. pusilla</i>               | Cooperation | Cooperation | Africa | --    | -- | -- | --              | --         |
| <i>E. canescens</i>             | Cooperation | Cooperation | Africa | --    | -- | -- | --              | --         |
| <i>E. scotops</i>               | Cooperation | Cooperation | Africa | --    | -- | -- | --              | --         |
| <i>E. gregalis</i>              | Cooperation | Cooperation | Africa | [716] | -- | -- | --              | --         |
| <i>E. badiceps</i>              | Cooperation | Cooperation | Africa | [524] | -- | -- | --              | --         |
| <i>E. turneri</i>               | Unknown     | Cooperation | Africa | --    | -- | -- | --              | --         |
| <i>E. atricollis</i>            | Cooperation | Cooperation | Africa | --    | -- | -- | --              | --         |
| <i>E. usticollis</i>            | Cooperation | Cooperation | Africa | --    | -- | -- | --              | --         |
| <i>Hemitesia neumanni</i>       | Unknown     | Pair        | Africa | --    | -- | -- | --              | --         |
| <i>Amaurocichla bocagii</i>     | Unknown     | Pair        | Africa | --    | -- | -- | --              | --         |
| <i>Erythrocerus mccallii</i>    | Cooperation | Cooperation | Africa | --    | -- | -- | --              | [546]      |
| <i>E. holochlorus</i>           | Suspected   | Cooperation | Africa | --    | -- | -- | --              | --         |
| <i>E. livingstonei</i>          | Cooperation | Cooperation | Africa | [717] | -- | -- | --              | --         |
| <i>Horizorhinus dohrni</i>      | Suspected   | Cooperation | Africa | [512] | -- | -- | --              | [3, 512]   |
| <i>Bradypterus victorini</i>    | Pair        | Pair        | Africa | [524] | -- | -- | b - Sphenoeacus | [591]      |
| <i>Melocichla mentalis</i>      | Pair        | Pair        | Africa | --    | -- | -- | --              | [591, 613] |
| <i>Achaetops pycnopygius</i>    | Pair        | Pair        | Africa | [512] | -- | -- | --              | [591]      |
| <i>Sphenoeacus afer</i>         | Pair        | Pair        | Africa | [524] | -- | -- | --              | --         |
| <i>Sylvietta virens</i>         | Cooperation | Cooperation | Africa | --    | -- | -- | --              | --         |
| <i>S. denti</i>                 | Pair        | Pair        | Africa | --    | -- | -- | --              | --         |
| <i>S. chapini</i>               | Unknown     | Pair        | Africa | --    | -- | -- | --              | --         |
| <i>S. leucophrys</i>            | Pair        | Pair        | Africa | --    | -- | -- | --              | --         |
| <i>S. brachyura</i>             | Pair        | Pair        | Africa | --    | -- | -- | --              | --         |
| <i>S. philippae</i>             | Unknown     | Pair        | Africa | --    | -- | -- | --              | --         |
| <i>S. ruficapilla</i>           | Pair        | Pair        | Africa | --    | -- | -- | --              | --         |
| <i>S. whytii</i>                | Pair        | Pair        | Africa | --    | -- | -- | --              | --         |
| <i>S. isabellina</i>            | Unknown     | Pair        | Africa | --    | -- | -- | --              | --         |
| <i>S. rufescens</i>             | Pair        | Pair        | Africa | --    | -- | -- | --              | --         |
| <i>Macrosphenus kempii</i>      | Unknown     | Pair        | Africa | --    | -- | -- | --              | --         |
| <i>M. flavicans</i>             | Unknown     | Pair        | Africa | --    | -- | -- | --              | --         |
| <i>M. concolor</i>              | Unknown     | Pair        | Africa | --    | -- | -- | --              | --         |
| <i>M. pulitzeri</i>             | Unknown     | Pair        | Africa | --    | -- | -- | --              | --         |
| <i>M. kretschmeri</i>           | Unknown     | Pair        | Africa | --    | -- | -- | --              | --         |
| <i>Hylia prasina</i>            | Unknown     | Pair        | Africa | --    | -- | -- | c - Hylia       | [718]      |
| <i>Hylota flavigaster</i>       | Unknown     | Pair        | Africa | --    | -- | -- | --              | [718, 719] |
| <i>H. australis</i>             | Unknown     | Pair        | Africa | --    | -- | -- | --              | --         |
| <i>H. violacea</i>              | Unknown     | Pair        | Africa | --    | -- | -- | --              | --         |
| <i>Pholidornis rushiae</i>      | Cooperation | Cooperation | Africa | [512] | -- | -- | --              | [718]      |
| <i>Dromaeocercus brunneus</i>   | Unknown     | Pair        | Africa | [525] | -- | -- | d - Malagasy    | [709]      |

|                                  |             |             |             |                 |    |                   |              |            |       |
|----------------------------------|-------------|-------------|-------------|-----------------|----|-------------------|--------------|------------|-------|
| <i>Nesillas alaburana</i>        | Unknown     | Pair        | Africa      | [539, 720]      | -- | --                | --           | --         |       |
| <i>N. longicaudata</i>           | Unknown     | Pair        | Africa      | no source       | -- | --                | --           | --         |       |
| <i>N. typica</i>                 | Unknown     | Pair        | Africa      | [525]           | -- | --                | --           | --         |       |
| <i>N. brevicaudata</i>           | Unknown     | Pair        | Africa      | no source       | -- | --                | --           | --         |       |
| <i>N. mariae</i>                 | Unknown     | Pair        | Africa      | --              | -- | --                | --           | --         |       |
| <i>Newtonia amphichroa</i>       | Unknown     | Pair        | Africa      | [525]           | -- | --                | --           | --         |       |
| <i>N. brunneicauda</i>           | Unknown     | Pair        | Africa      | --              | -- | --                | --           | --         |       |
| <i>N. archboldi</i>              | Unknown     | Pair        | Africa      | --              | -- | --                | --           | --         |       |
| <i>N. fanovanae</i>              | Unknown     | Pair        | Africa      | --              | -- | --                | --           | --         |       |
| <i>Malia grata</i>               | Unknown     | Cooperation | Indomalayan | [446]           | -- | --                | e            | [3]        |       |
| <i>Donacobius atricapillus</i>   | Cooperation | Cooperation | Neotropical | [721, 722]      | -- | --                | f            | [723]      |       |
| <i>Dulus dominicus</i>           | Suspected   | Cooperation | Neotropical | [724]           | -- | --                | g            | [3]        |       |
| <i>Hypocolius ampelinus</i>      | Pair        | Pair        | Palaearctic | [725]           | -- | --                | h            | --         |       |
| <i>Nicator chloris</i>           | Pair        | Pair        | Africa      | [512, 636]      | -- | --                | I            | [591]      |       |
| <i>N. gularis</i>                | Pair        | Pair        | Africa      | --              | -- | --                | --           | --         |       |
| <i>N. vireo</i>                  | Pair        | Pair        | Africa      | --              | -- | --                | --           | --         |       |
| <i>Orthotomus metopias</i>       | Unknown     | Pair        | Africa      | [524]           | -- | --                | Polyphyletic | [591, 613] |       |
| <i>O. moreaui</i>                | Unknown     | Pair        | Africa      | --              | -- | --                | --           | --         |       |
| <i>O. cuculatus</i>              | Unknown     | Pair        | Indomalayan | [468]           | -- | --                | --           | --         |       |
| <i>O. heterolaemus</i>           | Subspp      | Subspp      | Indomalayan | --              | -- | --                | --           | --         |       |
| <i>O. castaneiceps</i>           | Unknown     | Pair        | Indomalayan | --              | -- | --                | --           | --         |       |
| <i>O. frontalis</i>              | Subspp      | Subspp      | Indomalayan | --              | -- | --                | --           | --         |       |
| <i>O. derbianus</i>              | Unknown     | Pair        | Indomalayan | --              | -- | --                | --           | --         |       |
| <i>O. sericeus</i>               | Unknown     | Pair        | Indomalayan | --              | -- | --                | --           | --         |       |
| <i>O. ruficeps</i>               | Unknown     | Pair        | Indomalayan | --              | -- | --                | --           | --         |       |
| <i>O. sepium</i>                 | Unknown     | Pair        | Indomalayan | [446]           | -- | --                | --           | --         |       |
| <i>O. samarensis</i>             | Unknown     | Pair        | Indomalayan | [468]           | -- | --                | --           | --         |       |
| <i>O. nigriceps</i>              | Unknown     | Pair        | Indomalayan | --              | -- | --                | --           | --         |       |
| <i>O. cinereiceps</i>            | Unknown     | Pair        | Indomalayan | --              | -- | --                | --           | --         |       |
| <b>Wren group: Troglodytidae</b> |             |             |             |                 |    |                   |              |            |       |
| <i>Odontorchilus branickii</i>   | Unknown     | Pair        | Neotropical | [726, 727]      | -- | bbbbbbbbbbbbbaaaa | [433]        | aa         | [723] |
| <i>O. cinereus</i>               | Unknown     | Pair        | Neotropical | --              | -- | --                | --           | --         | --    |
| <i>Catherpes mexicanus</i>       | Pair        | Pair        | Nearctic    | [726-728]       | -- | --                | --           | aba        | --    |
| <i>Hylorchilus sumichrasti</i>   | Pair        | Pair        | Neotropical | [726, 727]      | -- | --                | --           | --         | --    |
| <i>Salpinctes obsoletus</i>      | Pair        | Pair        | Nearctic    | [726, 727, 729] | -- | --                | --           | abb        | --    |
| <i>Microcerculus philomela</i>   | Unknown     | Pair        | Neotropical | [726, 727, 730] | -- | --                | --           | --         | --    |
| <i>M. marginatus</i>             | Pair        | Pair        | Neotropical | [726, 727]      | -- | --                | --           | --         | --    |
| <i>M. ustulatus</i>              | Unknown     | Pair        | Neotropical | --              | -- | --                | --           | --         | --    |
| <i>M. bambla</i>                 | Pair        | Pair        | Neotropical | [726, 727, 731] | -- | --                | --           | --         | --    |
| <i>Cistothorus platensis</i>     | Female only | Female only | Neotropical | [726, 727, 732] | -- | --                | --           | ba         | --    |
| <i>C. apolinari</i>              | Cooperation | Cooperation | Neotropical | [727, 733]      | -- | --                | --           | --         | --    |
| <i>C. meridae</i>                | Unknown     | Pair        | Neotropical | [726, 727]      | -- | --                | --           | --         | --    |
| <i>C. palustris</i>              | Pair        | Pair        | Nearctic    | [726, 727, 734] | -- | --                | --           | --         | --    |



|                                |             |             |             |                 |    |    |     |    |
|--------------------------------|-------------|-------------|-------------|-----------------|----|----|-----|----|
| <i>Troglodytes troglodytes</i> | Pair        | Pair        | Holarctic   | [615, 726, 727] | -- | -- | --  | -- |
| <i>T. aedon</i>                | Occasional  | Pair        | Nearctic    | [726, 727, 735] | -- | -- | --  | -- |
| <i>T. tanneri</i>              | Unknown     | Pair        | Neotropical | [726, 727]      | -- | -- | --  | -- |
| <i>T. rufociliatus</i>         | Pair        | Pair        | Neotropical | --              | -- | -- | --  | -- |
| <i>T. ochraceus</i>            | Unknown     | Pair        | Neotropical | --              | -- | -- | --  | -- |
| <i>T. monticola</i>            | Unknown     | Pair        | Neotropical | --              | -- | -- | --  | -- |
| <i>T. solstitialis</i>         | Unknown     | Pair        | Neotropical | --              | -- | -- | --  | -- |
| <i>T. rufulus</i>              | Unknown     | Pair        | Neotropical | --              | -- | -- | --  | -- |
| <i>T. sissonii</i>             | Unknown     | Pair        | Neotropical | --              | -- | -- | --  | -- |
| <i>Thryorchilus browni</i>     | Unknown     | Pair        | Neotropical | --              | -- | -- | --  | -- |
| <i>Thryomanes bewickii</i>     | Pair        | Pair        | Nearctic    | [726, 727, 736] | -- | -- | bbb | -- |
| <i>Campylorhynchus gularis</i> | Cooperation | Cooperation | Neotropical | [726, 727]      | -- | -- | --  | -- |
| <i>C. brunneicapillus</i>      | Cooperation | Cooperation | Neotropical | [726, 727, 737] | -- | -- | --  | -- |
| <i>C. jocosus</i>              | Cooperation | Cooperation | Neotropical | [726, 727]      | -- | -- | --  | -- |
| <i>C. yucatanicus</i>          | Suspected   | Cooperation | Neotropical | --              | -- | -- | --  | -- |
| <i>C. chiapensis</i>           | Cooperation | Cooperation | Neotropical | --              | -- | -- | --  | -- |
| <i>C. griseus</i>              | Cooperation | Cooperation | Neotropical | --              | -- | -- | --  | -- |
| <i>C. rufinucha</i>            | Cooperation | Cooperation | Neotropical | [726, 727, 738] | -- | -- | --  | -- |
| <i>C. turdinus</i>             | Cooperation | Cooperation | Neotropical | [726, 727, 739] | -- | -- | --  | -- |
| <i>C. megalopterus</i>         | Cooperation | Cooperation | Neotropical | [726, 727]      | -- | -- | --  | -- |
| <i>C. zonatus</i>              | Cooperation | Cooperation | Neotropical | --              | -- | -- | --  | -- |
| <i>C. albobrunneus</i>         | Suspected   | Cooperation | Neotropical | --              | -- | -- | --  | -- |
| <i>C. nuchalis</i>             | Cooperation | Cooperation | Neotropical | --              | -- | -- | --  | -- |
| <i>C. fasciatus</i>            | Cooperation | Cooperation | Neotropical | --              | -- | -- | --  | -- |
| <i>Cinnycerthia unirufa</i>    | Unknown     | Cooperation | Neotropical | --              | -- | -- | bbb | -- |
| <i>C. peruana</i>              | Suspected   | Cooperation | Neotropical | --              | -- | -- | --  | -- |
| <i>Thryothorus atrogularis</i> | Unknown     | Pair        | Neotropical | --              | -- | -- | --  | -- |
| <i>T. spadix</i>               | Unknown     | Pair        | Neotropical | --              | -- | -- | --  | -- |
| <i>T. fasciatoventris</i>      | Pair        | Pair        | Neotropical | --              | -- | -- | --  | -- |
| <i>T. euophrys</i>             | Unknown     | Pair        | Neotropical | --              | -- | -- | --  | -- |
| <i>T. eisenmanni</i>           | Unknown     | Pair        | Neotropical | --              | -- | -- | --  | -- |
| <i>T. mystacalis</i>           | Unknown     | Pair        | Neotropical | --              | -- | -- | --  | -- |
| <i>T. genibarbis</i>           | Unknown     | Pair        | Neotropical | --              | -- | -- | --  | -- |
| <i>T. coraya</i>               | Unknown     | Pair        | Neotropical | --              | -- | -- | --  | -- |
| <i>T. felix</i>                | Unknown     | Pair        | Neotropical | --              | -- | -- | --  | -- |
| <i>T. maculipectus</i>         | Pair        | Pair        | Neotropical | --              | -- | -- | --  | -- |
| <i>T. rutilus</i>              | Pair        | Pair        | Neotropical | --              | -- | -- | --  | -- |
| <i>T. sclateri</i>             | Unknown     | Pair        | Neotropical | --              | -- | -- | --  | -- |
| <i>T. semibadius</i>           | Pair        | Pair        | Neotropical | --              | -- | -- | --  | -- |
| <i>T. nigricapillus</i>        | Pair        | Pair        | Neotropical | --              | -- | -- | --  | -- |
| <i>T. thoracicus</i>           | Pair        | Pair        | Neotropical | --              | -- | -- | --  | -- |
| <i>T. leucopogon</i>           | Unknown     | Pair        | Neotropical | --              | -- | -- | --  | -- |
| <i>T. pleurostictus</i>        | Occasional  | Pair        | Neotropical | [726, 727, 738] | -- | -- | --  | -- |

|                                  |            |      |             |                      |    |    |          |    |
|----------------------------------|------------|------|-------------|----------------------|----|----|----------|----|
| <i>T. rufalbus</i>               | Pair       | Pair | Neotropical | [726, 727, 740]      | -- | -- | --       | -- |
| <i>T. nicefori</i>               | Unknown    | Pair | Neotropical | [726, 727]           | -- | -- | --       | -- |
| <i>T. sinaloa</i>                | Unknown    | Pair | Neotropical | --                   | -- | -- | --       | -- |
| <i>T. modestus</i>               | Pair       | Pair | Neotropical | --                   | -- | -- | --       | -- |
| <i>T. leucotis</i>               | Occasional | Pair | Neotropical | [726, 727, 740, 741] | -- | -- | --       | -- |
| <i>T. superciliaris</i>          | Unknown    | Pair | Neotropical | [726, 727]           | -- | -- | --       | -- |
| <i>T. guarayanus</i>             | Unknown    | Pair | Neotropical | --                   | -- | -- | --       | -- |
| <i>T. longirostris</i>           | Unknown    | Pair | Neotropical | --                   | -- | -- | --       | -- |
| <i>T. griseus</i>                | Unknown    | Pair | Neotropical | --                   | -- | -- | --       | -- |
| <i>Henicorhina leucosticta</i>   | Pair       | Pair | Neotropical | --                   | -- | -- | --       | -- |
| <i>H. leucophrys</i>             | Pair       | Pair | Neotropical | --                   | -- | -- | --       | -- |
| <i>H. leucoptera</i>             | Unknown    | Pair | Neotropical | --                   | -- | -- | --       | -- |
| <i>Cyphorhinus phaeocephalus</i> | Group      | Pair | Neotropical | [726, 727, 742]      | -- | -- | --       | -- |
| <i>C. thoracicus</i>             | Unknown    | Pair | Neotropical | [726, 727]           | -- | -- | --       | -- |
| <i>C. aradus</i>                 | Unknown    | Pair | Neotropical | --                   | -- | -- | --       | -- |
| <i>Ferminia cerverae</i>         | Unknown    | Pair | Neotropical | --                   | -- | -- | Untested | -- |
| <i>Thryothorus ludovicianus</i>  | Pair       | Pair | Nearctic    | [726, 727, 743]      | -- | -- | --       | -- |
| <i>Uropsila leucogastra</i>      | Pair       | Pair | Neotropical | [726, 727]           | -- | -- | --       | -- |

**Wren group: Polioptilidae**

|                               |            |      |             |       |                |       |
|-------------------------------|------------|------|-------------|-------|----------------|-------|
| <i>Auriparus flaviceps</i>    | Pair       | Pair | Nearctic    | [744] | bbdbbbbbbbaaab | [433] |
| <i>Microbates collaris</i>    | Unknown    | Pair | Neotropical | [370] | --             | --    |
| <i>M. cinereiventris</i>      | Pair       | Pair | Neotropical | [480] | --             | --    |
| <i>Ramphocaenus melanurus</i> | Pair       | Pair | Neotropical | [381] | --             | --    |
| <i>Polioptila caerulea</i>    | Pair       | Pair | Nearctic    | [745] | --             | --    |
| <i>P. californica</i>         | Occasional | Pair | Nearctic    | [746] | --             | --    |
| <i>P. melanura</i>            | Pair       | Pair | Nearctic    | [747] | --             | --    |
| <i>P. lembeyei</i>            | Pair       | Pair | Neotropical | [488] | --             | --    |
| <i>P. nigriceps</i>           | Pair       | Pair | Nearctic    | [493] | --             | --    |
| <i>P. albiloris</i>           | Pair       | Pair | Neotropical | [480] | --             | --    |
| <i>P. plumbea</i>             | Pair       | Pair | Neotropical | [381] | --             | --    |
| <i>P. lactea</i>              | Unknown    | Pair | Neotropical | [748] | --             | --    |
| <i>P. guianensis</i>          | Unknown    | Pair | Neotropical | [79]  | --             | --    |
| <i>P. schistaceigula</i>      | Unknown    | Pair | Neotropical | [370] | --             | --    |
| <i>P. dumicola</i>            | Unknown    | Pair | Neotropical | [481] | --             | --    |

**Wren group: Sittidae**

|                        |             |             |             |       |                |       |
|------------------------|-------------|-------------|-------------|-------|----------------|-------|
| <i>Sitta europaea</i>  | Pair        | Pair        | Palaearctic | [598] | bbdbbbbbbbaaba | [433] |
| <i>S. nagaensis</i>    | Pair        | Pair        | Palaearctic | --    | --             | --    |
| <i>S. cashmirensis</i> | Pair        | Pair        | Palaearctic | --    | --             | --    |
| <i>S. castanea</i>     | Pair        | Pair        | Indomalayan | --    | --             | --    |
| <i>S. himalayensis</i> | Pair        | Pair        | Palaearctic | --    | --             | --    |
| <i>S. victoriae</i>    | Unknown     | Pair        | Indomalayan | --    | --             | --    |
| <i>S. pygmaea</i>      | Cooperation | Cooperation | Nearctic    | [749] | --             | --    |
| <i>S. pusilla</i>      | Cooperation | Cooperation | Nearctic    | [750] | --             | --    |

|                                     |         |      |             |       |                     |            |
|-------------------------------------|---------|------|-------------|-------|---------------------|------------|
| <i>S. whiteheadi</i>                | Pair    | Pair | Palaearctic | [598] | --                  | --         |
| <i>S. ledanti</i>                   | Pair    | Pair | Palaearctic | --    | --                  | --         |
| <i>S. krueperi</i>                  | Pair    | Pair | Palaearctic | --    | --                  | --         |
| <i>S. villosa</i>                   | Pair    | Pair | Palaearctic | --    | --                  | --         |
| <i>S. yunnanensis</i>               | Unknown | Pair | Palaearctic | --    | --                  | --         |
| <i>S. canadensis</i>                | Pair    | Pair | Nearctic    | --    | --                  | --         |
| <i>S. leucopsis</i>                 | Pair    | Pair | Palaearctic | --    | --                  | --         |
| <i>S. carolinensis</i>              | Pair    | Pair | Nearctic    | --    | --                  | --         |
| <i>S. neumayer</i>                  | Pair    | Pair | Palaearctic | --    | --                  | --         |
| <i>S. tephronota</i>                | Pair    | Pair | Palaearctic | --    | --                  | --         |
| <i>S. frontalis</i>                 | Pair    | Pair | Indomalayan | --    | --                  | --         |
| <i>S. solangiae</i>                 | Unknown | Pair | Indomalayan | --    | --                  | --         |
| <i>S. oenochlamys</i>               | Unknown | Pair | Indomalayan | --    | --                  | --         |
| <i>S. azurea</i>                    | Unknown | Pair | Indomalayan | --    | --                  | --         |
| <i>S. magna</i>                     | Unknown | Pair | Indomalayan | --    | --                  | --         |
| <i>S. formosa</i>                   | Unknown | Pair | Indomalayan | --    | --                  | --         |
| <i>Tichodroma muraria</i>           | Pair    | Pair | Palaearctic | --    | --                  | --         |
| <b>Wren group: Certhiidae</b>       |         |      |             |       |                     |            |
| <i>Certhia familiaris</i>           | Pair    | Pair | Palaearctic | [598] | bbdbbbbbbbbbbaabb   | [433]      |
| <i>C. americana</i>                 | Pair    | Pair | Nearctic    | --    | --                  | --         |
| <i>C. brachydactyla</i>             | Pair    | Pair | Palaearctic | --    | --                  | --         |
| <i>C. himalayana</i>                | Pair    | Pair | Palaearctic | --    | --                  | --         |
| <i>C. nipalensis</i>                | Unknown | Pair | Palaearctic | --    | --                  | --         |
| <i>C. discolor</i>                  | Unknown | Pair | Indomalayan | --    | --                  | --         |
| <i>Salpomis spilonotus</i>          | Pair    | Pair | Widespread  | --    | --                  | --         |
| <b>Regulidae: Regulidae</b>         |         |      |             |       |                     |            |
| <i>Regulus calendula</i>            | Pair    | Pair | Nearctic    | [751] | bbdbbbbbbbbbbbaba   | [433]      |
| <i>R. regulus</i>                   | Pair    | Pair | Palaearctic | [643] | --                  | --         |
| <i>R. teneriffae</i>                | Pair    | Pair | Palaearctic | [752] | --                  | --         |
| <i>R. goodfellowi</i>               | Pair    | Pair | Palaearctic | [648] | --                  | --         |
| <i>R. ignicapillus</i>              | Pair    | Pair | Palaearctic | [643] | --                  | --         |
| <i>R. satrapa</i>                   | Pair    | Pair | Nearctic    | [753] | --                  | --         |
| <b>Bombycillidae: Bombycillidae</b> |         |      |             |       |                     |            |
| <i>Ptilogonys cinereus</i>          | Unknown | Pair | Neotropical | [754] | bbdbbbbbbbbbbbabba  | [755, 756] |
| <i>P. caudatus</i>                  | Pair    | Pair | Neotropical | --    | --                  | --         |
| <i>Phainopepla nitens</i>           | Pair    | Pair | Neotropical | --    | --                  | --         |
| <i>Phainoptila melanoxantha</i>     | Unknown | Pair | Neotropical | --    | --                  | --         |
| <i>Bombycilla garrulus</i>          | Pair    | Pair | Palaearctic | [757] | --                  | --         |
| <i>B. japonica</i>                  | Pair    | Pair | Palaearctic | --    | --                  | --         |
| <i>B. cedrorum</i>                  | Pair    | Pair | Nearctic    | --    | --                  | --         |
| <b>Muscicapoidea: Sturnidae</b>     |         |      |             |       |                     |            |
| <i>Rhabdornis mystacalis</i>        | Unknown | Pair | Indomalayan | [468] | bbdbbbbbbbbbbbabbaa | [755]      |
| <i>R. grandis</i>                   | Unknown | Pair | Indomalayan | --    | --                  | --         |

|                                 |             |             |             |            |    |    |
|---------------------------------|-------------|-------------|-------------|------------|----|----|
| <i>R. inornatus</i>             | Unknown     | Pair        | Indomalayan | --         | -- | -- |
| <i>Aplonis zelandica</i>        | Unknown     | Pair        | Australia   | [758]      | -- | -- |
| <i>A. santovestris</i>          | Unknown     | Pair        | Australia   | --         | -- | -- |
| <i>A. pelzelni</i>              | Unknown     | Pair        | Australia   | --         | -- | -- |
| <i>A. atrifusca</i>             | Unknown     | Pair        | Australia   | --         | -- | -- |
| <i>A. mavornata</i>             | Unknown     | Pair        | Australia   | --         | -- | -- |
| <i>A. cinerascens</i>           | Unknown     | Pair        | Australia   | --         | -- | -- |
| <i>A. tabuensis</i>             | Unknown     | Pair        | Australia   | --         | -- | -- |
| <i>A. striata</i>               | Unknown     | Pair        | Australia   | --         | -- | -- |
| <i>A. opaca</i>                 | Pair        | Pair        | Australia   | --         | -- | -- |
| <i>A. crassa</i>                | Unknown     | Pair        | Australia   | --         | -- | -- |
| <i>A. cantoroides</i>           | Pair        | Pair        | Australia   | [125, 758] | -- | -- |
| <i>A. feadensis</i>             | Unknown     | Pair        | Australia   | [758]      | -- | -- |
| <i>A. insularis</i>             | Unknown     | Pair        | Australia   | --         | -- | -- |
| <i>A. grandis</i>               | Unknown     | Pair        | Australia   | [125, 758] | -- | -- |
| <i>A. dichroa</i>               | Unknown     | Pair        | Australia   | [758]      | -- | -- |
| <i>A. mysolensis</i>            | Unknown     | Pair        | Australia   | --         | -- | -- |
| <i>A. minor</i>                 | Pair        | Pair        | Indomalayan | --         | -- | -- |
| <i>A. panayensis</i>            | Unknown     | Pair        | Indomalayan | --         | -- | -- |
| <i>A. metallica</i>             | Pair        | Pair        | Australia   | --         | -- | -- |
| <i>A. magna</i>                 | Unknown     | Pair        | Australia   | --         | -- | -- |
| <i>A. mystacea</i>              | Unknown     | Pair        | Australia   | --         | -- | -- |
| <i>A. brunneicapilla</i>        | Pair        | Pair        | Australia   | [125, 758] | -- | -- |
| <i>Poeoptera stuhlmanni</i>     | Unknown     | Pair        | Africa      | [512, 758] | -- | -- |
| <i>P. kenricki</i>              | Unknown     | Pair        | Africa      | --         | -- | -- |
| <i>P. lugubris</i>              | Unknown     | Pair        | Africa      | --         | -- | -- |
| <i>Grafisia torquata</i>        | Unknown     | Pair        | Africa      | --         | -- | -- |
| <i>Onychognathus walleri</i>    | Pair        | Pair        | Africa      | --         | -- | -- |
| <i>O. nabouroup</i>             | Pair        | Pair        | Africa      | --         | -- | -- |
| <i>O. tristranii</i>            | Pair        | Pair        | Palaearctic | --         | -- | -- |
| <i>O. morio</i>                 | Pair        | Pair        | Africa      | --         | -- | -- |
| <i>O. blythii</i>               | Unknown     | Pair        | Africa      | --         | -- | -- |
| <i>O. frater</i>                | Unknown     | Pair        | Africa      | --         | -- | -- |
| <i>O. fulgidus</i>              | Unknown     | Pair        | Africa      | --         | -- | -- |
| <i>O. tenuirostris</i>          | Pair        | Pair        | Africa      | --         | -- | -- |
| <i>O. albirostris</i>           | Pair        | Pair        | Africa      | --         | -- | -- |
| <i>O. salvadorii</i>            | Unknown     | Pair        | Africa      | --         | -- | -- |
| <i>Coccycolius iris</i>         | Captivity   | Cooperation | Africa      | --         | -- | -- |
| <i>Lamprotornis cupreocauda</i> | Unknown     | Pair        | Africa      | --         | -- | -- |
| <i>L. purpureiceps</i>          | Unknown     | Pair        | Africa      | --         | -- | -- |
| <i>L. corruscus</i>             | Pair        | Pair        | Africa      | --         | -- | -- |
| <i>L. purpureus</i>             | Unknown     | Pair        | Africa      | --         | -- | -- |
| <i>L. nitens</i>                | Cooperation | Cooperation | Africa      | --         | -- | -- |

|                               |             |             |             |            |    |    |
|-------------------------------|-------------|-------------|-------------|------------|----|----|
| <i>L. chalcurus</i>           | Unknown     | Pair        | Africa      | --         | -- | -- |
| <i>L. chalybaeus</i>          | Pair        | Pair        | Africa      | --         | -- | -- |
| <i>L. chloropterus</i>        | Cooperation | Cooperation | Africa      | --         | -- | -- |
| <i>L. elisabeth</i>           | Subspp      | Subspp      | Africa      | --         | -- | -- |
| <i>L. acuticaudus</i>         | Unknown     | Pair        | Africa      | --         | -- | -- |
| <i>L. splendidus</i>          | Pair        | Pair        | Africa      | --         | -- | -- |
| <i>L. ornatus</i>             | Unknown     | Pair        | Africa      | --         | -- | -- |
| <i>L. australis</i>           | Pair        | Pair        | Africa      | --         | -- | -- |
| <i>L. mevesii</i>             | Cooperation | Cooperation | Africa      | --         | -- | -- |
| <i>L. caudatus</i>            | Cooperation | Cooperation | Africa      | --         | -- | -- |
| <i>L. purpuropterus</i>       | Cooperation | Cooperation | Africa      | --         | -- | -- |
| <i>L. superbus</i>            | Cooperation | Cooperation | Africa      | --         | -- | -- |
| <i>L. pulcher</i>             | Cooperation | Cooperation | Africa      | --         | -- | -- |
| <i>L. shelleyi</i>            | Pair        | Pair        | Africa      | --         | -- | -- |
| <i>L. hildebrandti</i>        | Unknown     | Pair        | Africa      | --         | -- | -- |
| <i>Cinnyricinclus sharpii</i> | Unknown     | Pair        | Africa      | --         | -- | -- |
| <i>C. femoralis</i>           | Unknown     | Pair        | Africa      | --         | -- | -- |
| <i>C. leucogaster</i>         | Occasional  | Pair        | Africa      | --         | -- | -- |
| <i>Speculipastor bicolor</i>  | Suspected   | Cooperation | Africa      | --         | -- | -- |
| <i>Neocichla gutturalis</i>   | Cooperation | Cooperation | Africa      | --         | -- | -- |
| <i>Spreo fischeri</i>         | Cooperation | Cooperation | Africa      | --         | -- | -- |
| <i>S. bicolor</i>             | Cooperation | Cooperation | Africa      | --         | -- | -- |
| <i>S. albicapillus</i>        | Unknown     | Cooperation | Africa      | --         | -- | -- |
| <i>Cosmopsarus regius</i>     | Cooperation | Cooperation | Africa      | --         | -- | -- |
| <i>C. unicolor</i>            | Cooperation | Cooperation | Africa      | --         | -- | -- |
| <i>Saroglossa aurata</i>      | Unknown     | Pair        | Africa      | [758]      | -- | -- |
| <i>S. spiloptera</i>          | Unknown     | Pair        | Indomalayan | --         | -- | -- |
| <i>Creatophora cinerea</i>    | Pair        | Pair        | Africa      | [512, 758] | -- | -- |
| <i>Sturnus senex</i>          | Unknown     | Pair        | Indomalayan | [758]      | -- | -- |
| <i>S. malabaricus</i>         | Pair        | Pair        | Indomalayan | --         | -- | -- |
| <i>S. erythrogygius</i>       | Unknown     | Pair        | Indomalayan | --         | -- | -- |
| <i>S. pagodarum</i>           | Pair        | Pair        | Indomalayan | --         | -- | -- |
| <i>S. sericeus</i>            | Unknown     | Pair        | Palaearctic | --         | -- | -- |
| <i>S. sturninus</i>           | Pair        | Pair        | Palaearctic | --         | -- | -- |
| <i>S. philippensis</i>        | Pair        | Pair        | Palaearctic | --         | -- | -- |
| <i>S. sinensis</i>            | Unknown     | Pair        | Palaearctic | --         | -- | -- |
| <i>S. roseus</i>              | Unknown     | Pair        | Palaearctic | --         | -- | -- |
| <i>S. vulgaris</i>            | Occasional  | Pair        | Palaearctic | [759]      | -- | -- |
| <i>S. unicolor</i>            | Pair        | Pair        | Palaearctic | [758]      | -- | -- |
| <i>S. cineraceus</i>          | Pair        | Pair        | Palaearctic | --         | -- | -- |
| <i>S. contra</i>              | Pair        | Pair        | Indomalayan | --         | -- | -- |
| <i>S. nigricollis</i>         | Unknown     | Pair        | Indomalayan | --         | -- | -- |
| <i>S. burmannicus</i>         | Unknown     | Pair        | Indomalayan | --         | -- | -- |

|                                  |             |             |             |                 |                   |       |
|----------------------------------|-------------|-------------|-------------|-----------------|-------------------|-------|
| <i>S. melanopterus</i>           | Pair        | Pair        | Indomalayan | [455]           | --                | --    |
| <i>Leucopsar rothschildi</i>     | Pair        | Pair        | Indomalayan | --              | --                | --    |
| <i>Acridotheres tristis</i>      | Pair        | Pair        | Widespread  | [758]           | --                | --    |
| <i>A. ginginianus</i>            | Pair        | Pair        | Indomalayan | --              | --                | --    |
| <i>A. fuscus</i>                 | Pair        | Pair        | Indomalayan | --              | --                | --    |
| <i>A. grandis</i>                | Pair        | Pair        | Indomalayan | --              | --                | --    |
| <i>A. cinereus</i>               | Unknown     | Pair        | Indomalayan | --              | --                | --    |
| <i>A. albocinctus</i>            | Unknown     | Pair        | Indomalayan | --              | --                | --    |
| <i>A. cristatellus</i>           | Pair        | Pair        | Palaearctic | --              | --                | --    |
| <i>Ampeliceps coronatus</i>      | Unknown     | Pair        | Indomalayan | --              | --                | --    |
| <i>Mino anais</i>                | Unknown     | Pair        | Australia   | --              | --                | --    |
| <i>M. dumontii</i>               | Cooperation | Cooperation | Australia   | [758, 760]      | --                | --    |
| <i>Basilornis celebensis</i>     | Unknown     | Pair        | Indomalayan | [758]           | --                | --    |
| <i>B. galeatus</i>               | Unknown     | Pair        | Indomalayan | --              | --                | --    |
| <i>B. corythaix</i>              | Unknown     | Pair        | Indomalayan | --              | --                | --    |
| <i>B. miranda</i>                | Unknown     | Pair        | Indomalayan | --              | --                | --    |
| <i>Streptocitta albicollis</i>   | Unknown     | Pair        | Indomalayan | --              | --                | --    |
| <i>S. albertinae</i>             | Unknown     | Pair        | Indomalayan | --              | --                | --    |
| <i>Sarcops calvus</i>            | Unknown     | Pair        | Indomalayan | --              | --                | --    |
| <i>Gracula ptilogenys</i>        | Pair        | Pair        | Indomalayan | --              | --                | --    |
| <i>G. religiosa</i>              | Pair        | Pair        | Indomalayan | --              | --                | --    |
| <i>Enodes erythrophris</i>       | Unknown     | Pair        | Indomalayan | --              | --                | --    |
| <i>Scissirostrum dubium</i>      | Pair        | Pair        | Indomalayan | --              | --                | --    |
| <i>Buphagus africanus</i>        | Cooperation | Cooperation | Africa      | [512, 758]      | --                | --    |
| <i>B. erythrorhynchus</i>        | Cooperation | Cooperation | Africa      | --              | --                | --    |
| <b>Muscicapoidea: Mimidae</b>    |             |             |             |                 |                   |       |
| <i>Dumetella carolinensis</i>    | Pair        | Pair        | Nearctic    | [761, 762]      | bbbbbbbbbbbbbbbab | [755] |
| <i>Melanoptila glabrirostris</i> | Unknown     | Pair        | Neotropical | [762]           | --                | --    |
| <i>Melanotis caerulescens</i>    | Unknown     | Pair        | Neotropical | --              | --                | --    |
| <i>M. hypoleucus</i>             | Pair        | Pair        | Neotropical | --              | --                | --    |
| <i>Mimus polyglottos</i>         | Pair        | Pair        | Nearctic    | [762, 763]      | --                | --    |
| <i>M. gilvus</i>                 | Cooperation | Cooperation | Neotropical | [762, 764, 765] | --                | --    |
| <i>M. gundlachi</i>              | Unknown     | Pair        | Neotropical | [762]           | --                | --    |
| <i>M. saturninus</i>             | Suspected   | Cooperation | Neotropical | [356, 762]      | --                | --    |
| <i>M. patagonicus</i>            | Pair        | Pair        | Neotropical | [762]           | --                | --    |
| <i>M. dorsalis</i>               | Unknown     | Pair        | Neotropical | --              | --                | --    |
| <i>M. triurus</i>                | Unknown     | Pair        | Neotropical | --              | --                | --    |
| <i>M. longicaudatus</i>          | Unknown     | Pair        | Neotropical | --              | --                | --    |
| <i>M. thenca</i>                 | Pair        | Pair        | Neotropical | --              | --                | --    |
| <i>Nesomimus parvulus</i>        | Cooperation | Cooperation | Neotropical | --              | --                | --    |
| <i>N. trifasciatus</i>           | Cooperation | Cooperation | Neotropical | --              | --                | --    |
| <i>N. macdonaldi</i>             | Cooperation | Cooperation | Neotropical | --              | --                | --    |
| <i>N. melanotis</i>              | Pair        | Pair        | Neotropical | --              | --                | --    |

|                                  |             |             |             |            |             |       |    |       |
|----------------------------------|-------------|-------------|-------------|------------|-------------|-------|----|-------|
| <i>Mimodes graysoni</i>          | Pair        | Pair        | Neotropical | --         | --          | --    |    |       |
| <i>Oreoscoptes montanus</i>      | Pair        | Pair        | Nearctic    | [762, 766] | --          | --    |    |       |
| <i>Toxostoma rufum</i>           | Pair        | Pair        | Nearctic    | [762, 767] | --          | --    |    |       |
| <i>T. longirostre</i>            | Pair        | Pair        | Neotropical | [762, 768] | --          | --    |    |       |
| <i>T. guttatum</i>               | Unknown     | Pair        | Neotropical | [762]      | --          | --    |    |       |
| <i>T. bendirei</i>               | Pair        | Pair        | Nearctic    | [762, 769] | --          | --    |    |       |
| <i>T. cinereum</i>               | Unknown     | Pair        | Neotropical | [762]      | --          | --    |    |       |
| <i>T. curvirostre</i>            | Pair        | Pair        | Neotropical | [762, 770] | --          | --    |    |       |
| <i>T. ocellatum</i>              | Unknown     | Pair        | Neotropical | [762]      | --          | --    |    |       |
| <i>T. lecontei</i>               | Pair        | Pair        | Nearctic    | [762, 771] | --          | --    |    |       |
| <i>T. redivivum</i>              | Pair        | Pair        | Nearctic    | [762, 772] | --          | --    |    |       |
| <i>T. crissale</i>               | Pair        | Pair        | Neotropical | [762, 773] | --          | --    |    |       |
| <i>Cinlocerthia ruficauda</i>    | Unknown     | Pair        | Neotropical | [762]      | --          | --    |    |       |
| <i>C. gutturalis</i>             | Unknown     | Pair        | Neotropical | --         | --          | --    |    |       |
| <i>Ramphocinclus brachyurus</i>  | Cooperation | Cooperation | Neotropical | --         | --          | --    |    |       |
| <i>Margarops fuscus</i>          | Unknown     | Pair        | Neotropical | --         | --          | --    |    |       |
| <i>M. fuscatus</i>               | Unknown     | Pair        | Neotropical | --         | --          | --    |    |       |
| <b>Muscicapoidea: Cinclidae</b>  |             |             |             |            |             |       |    |       |
| <i>Cinclus cinclus</i>           | Pair        | Pair        | Palaearctic | [774]      | bbdbbbbbbba | [755] |    |       |
| <i>C. pallasii</i>               | Pair        | Pair        | Palaearctic | --         | --          | --    |    |       |
| <i>C. mexicanus</i>              | Pair        | Pair        | Nearctic    | --         | --          | --    |    |       |
| <i>C. leucocephalus</i>          | Unknown     | Pair        | Neotropical | --         | --          | --    |    |       |
| <i>C. schulzi</i>                | Pair        | Pair        | Neotropical | --         | --          | --    |    |       |
| <b>Muscicapoidea: Muscipidae</b> |             |             |             |            |             |       |    |       |
| <i>Kakamega poliothorax</i>      | Unknown     | Pair        | Africa      | [512]      | bbdbbbbbbba | [755] |    | [589] |
| <i>Empidonax semipartitus</i>    | Pair        | Pair        | Africa      | [524]      | --          | [756] | a  | [756] |
| <i>Bradornis pallidus</i>        | Suspected   | Cooperation | Africa      | --         | --          | --    | -- | --    |
| <i>B. infuscatus</i>             | Pair        | Pair        | Africa      | --         | --          | --    | -- | --    |
| <i>B. mariquensis</i>            | Cooperation | Cooperation | Africa      | --         | --          | --    | -- | --    |
| <i>B. pumilus</i>                | Subspp      | Subspp      | Africa      | --         | --          | --    | -- | --    |
| <i>B. microrhynchus</i>          | Pair        | Pair        | Africa      | --         | --          | --    | -- | --    |
| <i>Dioptrornis chocolatinus</i>  | Suspected   | Cooperation | Africa      | [775]      | --          | --    | -- | --    |
| <i>D. fischeri</i>               | Suspected   | Cooperation | Africa      | [524]      | --          | --    | -- | --    |
| <i>D. brunneus</i>               | Unknown     | Cooperation | Africa      | --         | --          | --    | -- | --    |
| <i>Melaenornis edoloides</i>     | Unknown     | Pair        | Africa      | --         | --          | --    | -- | --    |
| <i>M. pammelaina</i>             | Unknown     | Pair        | Africa      | --         | --          | --    | -- | --    |
| <i>M. ardesiacus</i>             | Unknown     | Pair        | Africa      | --         | --          | --    | -- | --    |
| <i>M. annamarulae</i>            | Unknown     | Cooperation | Africa      | --         | --          | --    | -- | --    |
| <i>Fraseria ocreata</i>          | Cooperation | Cooperation | Africa      | --         | --          | --    | -- | --    |
| <i>F. cinerascens</i>            | Pair        | Pair        | Africa      | --         | --          | --    | -- | --    |
| <i>Sigelus silens</i>            | Unknown     | Pair        | Africa      | --         | --          | --    | -- | --    |
| <i>Rhinomyias addita</i>         | Unknown     | Pair        | Indomalayan | [446]      | --          | --    | -- | --    |
| <i>R. oscillans</i>              | Unknown     | Pair        | Indomalayan | --         | --          | --    | -- | --    |

|                               |             |             |             |       |    |    |    |    |
|-------------------------------|-------------|-------------|-------------|-------|----|----|----|----|
| <i>R. brunneata</i>           | Unknown     | Pair        | Palaearctic | [455] | -- | -- | -- | -- |
| <i>R. olivacea</i>            | Unknown     | Pair        | Indomalayan | [99]  | -- | -- | -- | -- |
| <i>R. umbratilis</i>          | Unknown     | Pair        | Indomalayan | --    | -- | -- | -- | -- |
| <i>R. ruficauda</i>           | Unknown     | Pair        | Indomalayan | [468] | -- | -- | -- | -- |
| <i>R. colonus</i>             | Unknown     | Pair        | Indomalayan | [446] | -- | -- | -- | -- |
| <i>R. gularis</i>             | Unknown     | Pair        | Indomalayan | [99]  | -- | -- | -- | -- |
| <i>R. insignis</i>            | Unknown     | Pair        | Indomalayan | [455] | -- | -- | -- | -- |
| <i>R. albigularis</i>         | Unknown     | Pair        | Indomalayan | --    | -- | -- | -- | -- |
| <i>R. goodfellowi</i>         | Unknown     | Pair        | Indomalayan | [468] | -- | -- | -- | -- |
| <i>Muscicapa striata</i>      | Pair        | Pair        | Palaearctic | [511] | -- | -- | -- | -- |
| <i>M. gambagae</i>            | Unknown     | Pair        | Africa      | [524] | -- | -- | -- | -- |
| <i>M. griseisticta</i>        | Unknown     | Pair        | Palaearctic | [710] | -- | -- | -- | -- |
| <i>M. sibirica</i>            | Pair        | Pair        | Palaearctic | [697] | -- | -- | -- | -- |
| <i>M. dauurica</i>            | Pair        | Pair        | Palaearctic | --    | -- | -- | -- | -- |
| <i>M. randi</i>               | Unknown     | Pair        | Indomalayan | [468] | -- | -- | -- | -- |
| <i>M. segregata</i>           | Unknown     | Pair        | Indomalayan | [445] | -- | -- | -- | -- |
| <i>M. ruficauda</i>           | Pair        | Pair        | Palaearctic | [513] | -- | -- | -- | -- |
| <i>M. muttui</i>              | Pair        | Pair        | Palaearctic | --    | -- | -- | -- | -- |
| <i>M. ferruginea</i>          | Pair        | Pair        | Palaearctic | --    | -- | -- | -- | -- |
| <i>M. ussheri</i>             | Unknown     | Pair        | Africa      | [524] | -- | -- | -- | -- |
| <i>M. infuscata</i>           | Cooperation | Cooperation | Africa      | --    | -- | -- | -- | -- |
| <i>M. boehmi</i>              | Unknown     | Pair        | Africa      | --    | -- | -- | -- | -- |
| <i>M. aquatica</i>            | Pair        | Pair        | Africa      | --    | -- | -- | -- | -- |
| <i>M. olivascens</i>          | Unknown     | Pair        | Africa      | --    | -- | -- | -- | -- |
| <i>M. lendu</i>               | Unknown     | Pair        | Africa      | --    | -- | -- | -- | -- |
| <i>M. itombwensis</i>         | Unknown     | Pair        | Africa      | --    | -- | -- | -- | -- |
| <i>M. adusta</i>              | Pair        | Pair        | Africa      | --    | -- | -- | -- | -- |
| <i>M. epulata</i>             | Pair        | Pair        | Africa      | --    | -- | -- | -- | -- |
| <i>M. sethsmithi</i>          | Pair        | Pair        | Africa      | --    | -- | -- | -- | -- |
| <i>M. comitata</i>            | Pair        | Pair        | Africa      | --    | -- | -- | -- | -- |
| <i>M. tessmanni</i>           | Unknown     | Pair        | Africa      | --    | -- | -- | -- | -- |
| <i>M. cassini</i>             | Pair        | Pair        | Africa      | --    | -- | -- | -- | -- |
| <i>M. caerulescens</i>        | Pair        | Pair        | Africa      | --    | -- | -- | -- | -- |
| <i>Humblotia flavirostris</i> | Unknown     | Pair        | Africa      | [445] | -- | -- | -- | -- |
| <i>Ficedula hypoleuca</i>     | Occasional  | Pair        | Palaearctic | [511] | -- | -- | b  | -- |
| <i>F. albicollis</i>          | Occasional  | Pair        | Palaearctic | --    | -- | -- | -- | -- |
| <i>F. semitorquata</i>        | Pair        | Pair        | Palaearctic | --    | -- | -- | -- | -- |
| <i>F. zanthopygia</i>         | Pair        | Pair        | Palaearctic | [776] | -- | -- | -- | -- |
| <i>F. narcissina</i>          | Pair        | Pair        | Palaearctic | [697] | -- | -- | -- | -- |
| <i>F. mugimaki</i>            | Pair        | Pair        | Palaearctic | [710] | -- | -- | -- | -- |
| <i>F. hodgsonii</i>           | Pair        | Pair        | Indomalayan | [513] | -- | -- | -- | -- |
| <i>F. strophhiata</i>         | Pair        | Pair        | Palaearctic | --    | -- | -- | -- | -- |
| <i>F. parva</i>               | Pair        | Pair        | Palaearctic | [511] | -- | -- | -- | -- |



|                               |         |      |             |            |    |    |    |       |
|-------------------------------|---------|------|-------------|------------|----|----|----|-------|
| <i>F. subrubra</i>            | Pair    | Pair | Indomalayan | [455]      | -- | -- | -- | --    |
| <i>F. monileger</i>           | Pair    | Pair | Indomalayan | [513]      | -- | -- | -- | --    |
| <i>F. solitaris</i>           | Pair    | Pair | Indomalayan | [467]      | -- | -- | -- | --    |
| <i>F. hyperythra</i>          | Pair    | Pair | Indomalayan | [513]      | -- | -- | -- | --    |
| <i>F. dumetoria</i>           | Unknown | Pair | Indomalayan | [99]       | -- | -- | -- | --    |
| <i>F. rufigula</i>            | Unknown | Pair | Indomalayan | [446]      | -- | -- | -- | --    |
| <i>F. buruensis</i>           | Unknown | Pair | Indomalayan | --         | -- | -- | -- | --    |
| <i>F. basilanica</i>          | Unknown | Pair | Indomalayan | [455]      | -- | -- | -- | --    |
| <i>F. henrici</i>             | Unknown | Pair | Indomalayan | --         | -- | -- | -- | --    |
| <i>F. harterti</i>            | Unknown | Pair | Indomalayan | [446]      | -- | -- | -- | --    |
| <i>F. platenae</i>            | Unknown | Pair | Indomalayan | [455]      | -- | -- | -- | --    |
| <i>F. crypta</i>              | Unknown | Pair | Indomalayan | --         | -- | -- | -- | --    |
| <i>F. bonthaina</i>           | Unknown | Pair | Indomalayan | [468]      | -- | -- | -- | --    |
| <i>F. westermanni</i>         | Pair    | Pair | Indomalayan | [513]      | -- | -- | -- | --    |
| <i>F. superciliaris</i>       | Pair    | Pair | Indomalayan | --         | -- | -- | -- | --    |
| <i>F. tricolor</i>            | Unknown | Pair | Indomalayan | --         | -- | -- | -- | --    |
| <i>F. sapphira</i>            | Pair    | Pair | Indomalayan | --         | -- | -- | -- | --    |
| <i>F. nigrorufa</i>           | Pair    | Pair | Indomalayan | --         | -- | -- | -- | --    |
| <i>F. timorensis</i>          | Unknown | Pair | Indomalayan | [446]      | -- | -- | -- | --    |
| <i>Cyanoptila cyanomelana</i> | Pair    | Pair | Palaearctic | [513]      | -- | -- | -- | --    |
| <i>Eumyias thalassina</i>     | Pair    | Pair | Indomalayan | --         | -- | -- | -- | --    |
| <i>E. sordida</i>             | Unknown | Pair | Indomalayan | --         | -- | -- | -- | --    |
| <i>E. panayensis</i>          | Unknown | Pair | Indomalayan | [468]      | -- | -- | -- | --    |
| <i>E. albicaudata</i>         | Unknown | Pair | Indomalayan | [467, 513] | -- | -- | -- | --    |
| <i>E. indigo</i>              | Unknown | Pair | Indomalayan | [99]       | -- | -- | -- | --    |
| <i>Niltava grandis</i>        | Pair    | Pair | Indomalayan | [513]      | -- | -- | -- | --    |
| <i>N. macgrigoriae</i>        | Pair    | Pair | Indomalayan | --         | -- | -- | -- | --    |
| <i>N. davidi</i>              | Unknown | Pair | Indomalayan | [648]      | -- | -- | -- | --    |
| <i>N. sundara</i>             | Pair    | Pair | Indomalayan | [513]      | -- | -- | -- | --    |
| <i>N. sumatrana</i>           | Unknown | Pair | Indomalayan | [467]      | -- | -- | -- | --    |
| <i>N. vivida</i>              | Unknown | Pair | Indomalayan | [513]      | -- | -- | -- | --    |
| <i>Cyornis sanfordi</i>       | Unknown | Pair | Indomalayan | [455]      | -- | -- | b  | [756] |
| <i>C. hoevelli</i>            | Unknown | Pair | Indomalayan | [446]      | -- | -- | -- | --    |
| <i>C. hyacinthinus</i>        | Unknown | Pair | Indomalayan | --         | -- | -- | -- | --    |
| <i>C. concretus</i>           | Unknown | Pair | Indomalayan | [513]      | -- | -- | -- | --    |
| <i>C. ruckii</i>              | Unknown | Pair | Indomalayan | [455]      | -- | -- | -- | --    |
| <i>C. herioti</i>             | Unknown | Pair | Indomalayan | [468]      | -- | -- | -- | --    |
| <i>C. hainanus</i>            | Unknown | Pair | Indomalayan | [648]      | -- | -- | -- | --    |
| <i>C. pallipes</i>            | Unknown | Pair | Indomalayan | [513]      | -- | -- | -- | --    |
| <i>C. poliogenys</i>          | Pair    | Pair | Indomalayan | --         | -- | -- | -- | --    |
| <i>C. unicolor</i>            | Pair    | Pair | Indomalayan | --         | -- | -- | -- | --    |
| <i>C. rubeculoides</i>        | Pair    | Pair | Indomalayan | --         | -- | -- | -- | --    |
| <i>C. banyumas</i>            | Unknown | Pair | Indomalayan | --         | -- | -- | -- | --    |

|                                 |             |             |             |            |    |    |    |    |
|---------------------------------|-------------|-------------|-------------|------------|----|----|----|----|
| <i>C. lemprieri</i>             | Unknown     | Pair        | Indomalayan | [468]      | -- | -- | -- | -- |
| <i>C. superbus</i>              | Unknown     | Pair        | Indomalayan | [99]       | -- | -- | -- | -- |
| <i>C. caerulatus</i>            | Unknown     | Pair        | Indomalayan | --         | -- | -- | -- | -- |
| <i>C. turcosus</i>              | Unknown     | Pair        | Indomalayan | --         | -- | -- | -- | -- |
| <i>C. tickelliae</i>            | Unknown     | Pair        | Indomalayan | [468]      | -- | -- | -- | -- |
| <i>C. rufigaster</i>            | Unknown     | Pair        | Indomalayan | [467, 468] | -- | -- | -- | -- |
| <i>C. omissus</i>               | Unknown     | Pair        | Indomalayan | no source  | -- | -- | -- | -- |
| <i>Muscicapella hodgsoni</i>    | Unknown     | Pair        | Indomalayan | [513]      | -- | -- | -- | -- |
| <i>Pogonocichla stellata</i>    | Pair        | Pair        | Africa      | [777]      | -- | -- | -- | -- |
| <i>Swynnertonia swynnertoni</i> | Pair        | Pair        | Africa      | --         | -- | -- | -- | -- |
| <i>Stiphornis erythrothorax</i> | Pair        | Pair        | Africa      | --         | -- | -- | -- | -- |
| <i>Sheppardia poensis</i>       | Subspp      | Subspp      | Africa      | --         | -- | -- | -- | -- |
| <i>S. bocagei</i>               | Unknown     | Pair        | Africa      | --         | -- | -- | -- | -- |
| <i>S. cyornithopsis</i>         | Unknown     | Pair        | Africa      | --         | -- | -- | -- | -- |
| <i>S. aequatorialis</i>         | Pair        | Pair        | Africa      | --         | -- | -- | -- | -- |
| <i>S. sharpei</i>               | Unknown     | Pair        | Africa      | --         | -- | -- | -- | -- |
| <i>S. gunningi</i>              | Cooperation | Cooperation | Africa      | [777, 778] | -- | -- | -- | -- |
| <i>S. gabela</i>                | Unknown     | Pair        | Africa      | [777]      | -- | -- | -- | -- |
| <i>S. montana</i>               | Unknown     | Pair        | Africa      | --         | -- | -- | -- | -- |
| <i>S. lowei</i>                 | Unknown     | Pair        | Africa      | --         | -- | -- | -- | -- |
| <i>Erithacus rubecula</i>       | Occasional  | Pair        | Paelearctic | [615, 777] | -- | -- | -- | -- |
| <i>Luscinia akahige</i>         | Pair        | Pair        | Paelearctic | [777]      | -- | -- | -- | -- |
| <i>L. komadori</i>              | Pair        | Pair        | Paelearctic | --         | -- | -- | -- | -- |
| <i>L. sibilans</i>              | Pair        | Pair        | Paelearctic | --         | -- | -- | -- | -- |
| <i>L. luscinia</i>              | Pair        | Pair        | Paelearctic | --         | -- | -- | -- | -- |
| <i>L. megarhynchos</i>          | Pair        | Pair        | Paelearctic | --         | -- | -- | -- | -- |
| <i>L. calliope</i>              | Pair        | Pair        | Paelearctic | --         | -- | -- | -- | -- |
| <i>L. pectoralis</i>            | Pair        | Pair        | Paelearctic | --         | -- | -- | -- | -- |
| <i>L. svecica</i>               | Pair        | Pair        | Paelearctic | --         | -- | -- | -- | -- |
| <i>L. ruficeps</i>              | Unknown     | Pair        | Paelearctic | --         | -- | -- | -- | -- |
| <i>L. obscura</i>               | Unknown     | Pair        | Paelearctic | --         | -- | -- | -- | -- |
| <i>L. pectardens</i>            | Unknown     | Pair        | Paelearctic | --         | -- | -- | -- | -- |
| <i>L. brunnea</i>               | Pair        | Pair        | Paelearctic | --         | -- | -- | -- | -- |
| <i>L. cyane</i>                 | Pair        | Pair        | Paelearctic | --         | -- | -- | -- | -- |
| <i>Tarsiger cyanurus</i>        | Pair        | Pair        | Paelearctic | --         | -- | -- | -- | -- |
| <i>T. chrysaesus</i>            | Unknown     | Pair        | Paelearctic | --         | -- | -- | -- | -- |
| <i>T. indicus</i>               | Pair        | Pair        | Paelearctic | --         | -- | -- | -- | -- |
| <i>T. hyperythrus</i>           | Unknown     | Pair        | Paelearctic | --         | -- | -- | -- | -- |
| <i>T. johnstoniae</i>           | Unknown     | Pair        | Paelearctic | --         | -- | -- | -- | -- |
| <i>Irania gutturalis</i>        | Pair        | Pair        | Paelearctic | --         | -- | -- | -- | -- |
| <i>Cossypha isabellae</i>       | Unknown     | Pair        | Africa      | --         | -- | -- | -- | -- |
| <i>Cossyphicula roberti</i>     | Unknown     | Pair        | Africa      | --         | -- | -- | -- | -- |
| <i>Cossypha archeri</i>         | Unknown     | Pair        | Africa      | --         | -- | -- | -- | -- |

|                                    |             |             |             |                 |    |       |    |       |
|------------------------------------|-------------|-------------|-------------|-----------------|----|-------|----|-------|
| <i>C. anomala</i>                  | Pair        | Pair        | Africa      | --              | -- | --    | -- | --    |
| <i>C. caffra</i>                   | Pair        | Pair        | Africa      | --              | -- | --    | -- | --    |
| <i>C. humeralis</i>                | Pair        | Pair        | Africa      | --              | -- | --    | -- | --    |
| <i>C. cyanocampter</i>             | Pair        | Pair        | Africa      | --              | -- | --    | -- | --    |
| <i>Sheppardia polioptera</i>       | Unknown     | Pair        | Africa      | --              | -- | --    | -- | --    |
| <i>Cossypha semirufa</i>           | Pair        | Pair        | Africa      | --              | -- | --    | -- | --    |
| <i>C. heuglini</i>                 | Pair        | Pair        | Africa      | --              | -- | --    | -- | --    |
| <i>C. natalensis</i>               | Pair        | Pair        | Africa      | --              | -- | --    | -- | --    |
| <i>C. dichroa</i>                  | Pair        | Pair        | Africa      | --              | -- | --    | -- | --    |
| <i>C. heinrichi</i>                | Unknown     | Pair        | Africa      | --              | -- | --    | -- | --    |
| <i>C. niveicapilla</i>             | Pair        | Pair        | Africa      | --              | -- | --    | -- | --    |
| <i>C. albicapilla</i>              | Unknown     | Pair        | Africa      | --              | -- | --    | -- | --    |
| <i>Xenocopsychus ansorgei</i>      | Pair        | Pair        | Africa      | --              | -- | --    | -- | --    |
| <i>Cichladusa arquata</i>          | Pair        | Pair        | Africa      | --              | -- | --    | -- | --    |
| <i>C. ruficauda</i>                | Pair        | Pair        | Africa      | --              | -- | --    | -- | --    |
| <i>C. guttata</i>                  | Pair        | Pair        | Africa      | --              | -- | --    | -- | --    |
| <i>Erythropterygia leucosticta</i> | Unknown     | Pair        | Africa      | --              | -- | --    | a  | [756] |
| <i>E. quadrivirgata</i>            | Pair        | Pair        | Africa      | --              | -- | --    | -- | --    |
| <i>E. barbata</i>                  | Pair        | Pair        | Africa      | --              | -- | --    | -- | --    |
| <i>E. signata</i>                  | Pair        | Pair        | Africa      | --              | -- | --    | -- | --    |
| <i>E. hartlaubi</i>                | Pair        | Pair        | Africa      | --              | -- | --    | -- | --    |
| <i>E. leucophrys</i>               | Pair        | Pair        | Africa      | --              | -- | --    | -- | --    |
| <i>E. galactotes</i>               | Pair        | Pair        | Africa      | --              | -- | --    | -- | --    |
| <i>E. paena</i>                    | Pair        | Pair        | Africa      | --              | -- | --    | -- | --    |
| <i>E. coryphaeus</i>               | Cooperation | Cooperation | Africa      | [777, 779-781]  | -- | --    | -- | --    |
| <i>Cercotrichas podobe</i>         | Pair        | Pair        | Africa      | [777]           | -- | --    | -- | --    |
| <i>Namibornis herero</i>           | Pair        | Pair        | Africa      | [503]           | -- | [591] | -- | [591] |
| <i>Copsychus sechellarum</i>       | Cooperation | Cooperation | Africa      | [539, 777]      | -- | [756] | -- | [756] |
| <i>C. albospectularis</i>          | Pair        | Pair        | Africa      | [777]           | -- | --    | -- | --    |
| <i>C. saularis</i>                 | Pair        | Pair        | Indomalayan | --              | -- | --    | -- | --    |
| <i>C. malabaricus</i>              | Cooperation | Cooperation | Indomalayan | [777, 782, 783] | -- | --    | -- | --    |
| <i>C. stricklandii</i>             | Subspp      | Subspp      | Indomalayan | [777]           | -- | --    | -- | --    |
| <i>C. luzoniensis</i>              | Unknown     | Pair        | Indomalayan | --              | -- | --    | -- | --    |
| <i>C. niger</i>                    | Unknown     | Pair        | Indomalayan | --              | -- | --    | -- | --    |
| <i>C. cebuensis</i>                | Unknown     | Pair        | Indomalayan | --              | -- | --    | -- | --    |
| <i>Trichixos pyrropyga</i>         | Unknown     | Pair        | Indomalayan | --              | -- | --    | -- | --    |
| <i>Saxicoloides fulicata</i>       | Pair        | Pair        | Indomalayan | --              | -- | --    | -- | --    |
| <i>Phoenicurus alaschanicus</i>    | Unknown     | Pair        | Palaearctic | --              | -- | --    | b  | [756] |
| <i>P. erythronota</i>              | Pair        | Pair        | Palaearctic | --              | -- | --    | -- | --    |
| <i>P. caeruleocephalus</i>         | Pair        | Pair        | Palaearctic | --              | -- | --    | -- | --    |
| <i>P. ochruros</i>                 | Cooperation | Cooperation | Palaearctic | [615, 777, 784] | -- | --    | -- | --    |
| <i>P. phoenicurus</i>              | Pair        | Pair        | Palaearctic | [777]           | -- | --    | -- | --    |
| <i>P. hodgsoni</i>                 | Unknown     | Pair        | Palaearctic | --              | -- | --    | -- | --    |

|                                    |             |             |             |            |    |    |    |       |
|------------------------------------|-------------|-------------|-------------|------------|----|----|----|-------|
| <i>P. schisticeps</i>              | Pair        | Pair        | Palaearctic | --         | -- | -- | -- | --    |
| <i>P. aureus</i>                   | Pair        | Pair        | Palaearctic | --         | -- | -- | -- | --    |
| <i>P. moussieri</i>                | Pair        | Pair        | Palaearctic | --         | -- | -- | -- | --    |
| <i>P. erythrogaster</i>            | Pair        | Pair        | Palaearctic | --         | -- | -- | -- | --    |
| <i>P. frontalis</i>                | Pair        | Pair        | Palaearctic | --         | -- | -- | -- | --    |
| <i>Chaimarrornis leucocephalus</i> | Pair        | Pair        | Palaearctic | --         | -- | -- | -- | --    |
| <i>Rhyacornis fuliginosus</i>      | Pair        | Pair        | Palaearctic | --         | -- | -- | -- | --    |
| <i>R. bicolor</i>                  | Unknown     | Pair        | Indomalayan | --         | -- | -- | -- | --    |
| <i>Hodgsonius phaenicuroides</i>   | Pair        | Pair        | Indomalayan | --         | -- | -- | -- | --    |
| <i>Myiomela leucurum</i>           | Pair        | Pair        | Indomalayan | --         | -- | -- | -- | --    |
| <i>M. diana</i>                    | Unknown     | Pair        | Indomalayan | --         | -- | -- | -- | --    |
| <i>M. major</i>                    | Unknown     | Pair        | Indomalayan | --         | -- | -- | b  | [756] |
| <i>Cinclidium frontale</i>         | Unknown     | Pair        | Indomalayan | --         | -- | -- | -- | --    |
| <i>Grandala coelicolor</i>         | Pair        | Pair        | Palaearctic | --         | -- | -- | -- | --    |
| <i>Enicurus scouleri</i>           | Pair        | Pair        | Palaearctic | --         | -- | -- | b  | [756] |
| <i>E. velatus</i>                  | Unknown     | Pair        | Indomalayan | --         | -- | -- | -- | --    |
| <i>E. ruficapillus</i>             | Unknown     | Pair        | Indomalayan | --         | -- | -- | -- | --    |
| <i>E. immaculatus</i>              | Pair        | Pair        | Indomalayan | --         | -- | -- | -- | --    |
| <i>E. schistaceus</i>              | Pair        | Pair        | Indomalayan | --         | -- | -- | -- | --    |
| <i>E. leschenaulti</i>             | Pair        | Pair        | Indomalayan | --         | -- | -- | -- | --    |
| <i>E. maculatus</i>                | Pair        | Pair        | Indomalayan | --         | -- | -- | -- | --    |
| <i>Saxicola rubetra</i>            | Occasional  | Pair        | Palaearctic | [615, 777] | -- | -- | -- | --    |
| <i>S. macrorhyncha</i>             | Unknown     | Pair        | Indomalayan | [777]      | -- | -- | -- | --    |
| <i>S. insignis</i>                 | Pair        | Pair        | Palaearctic | --         | -- | -- | -- | --    |
| <i>S. dacotiae</i>                 | Cooperation | Cooperation | Palaearctic | [615, 777] | -- | -- | -- | --    |
| <i>S. torquata</i>                 | Pair        | Pair        | Palaearctic | --         | -- | -- | -- | --    |
| <i>S. tectes</i>                   | Pair        | Pair        | Africa      | [777]      | -- | -- | -- | --    |
| <i>S. leucura</i>                  | Pair        | Pair        | Indomalayan | --         | -- | -- | -- | --    |
| <i>S. caprata</i>                  | Pair        | Pair        | Indomalayan | --         | -- | -- | -- | --    |
| <i>S. jerdoni</i>                  | Unknown     | Pair        | Indomalayan | --         | -- | -- | -- | --    |
| <i>S. ferrea</i>                   | Pair        | Pair        | Indomalayan | --         | -- | -- | -- | --    |
| <i>S. gutturalis</i>               | Pair        | Pair        | Australia   | --         | -- | -- | -- | --    |
| <i>Campilicoides bifasciata</i>    | Cooperation | Cooperation | Africa      | [777, 785] | -- | -- | -- | --    |
| <i>Oenanthe leucopyga</i>          | Occasional  | Pair        | Palaearctic | [615, 777] | -- | -- | -- | --    |
| <i>O. monacha</i>                  | Pair        | Pair        | Palaearctic | [777]      | -- | -- | -- | --    |
| <i>O. alboniger</i>                | Pair        | Pair        | Palaearctic | --         | -- | -- | -- | --    |
| <i>O. leucura</i>                  | Pair        | Pair        | Palaearctic | --         | -- | -- | -- | --    |
| <i>O. monticola</i>                | Pair        | Pair        | Africa      | --         | -- | -- | -- | --    |
| <i>O. phillipsi</i>                | Pair        | Pair        | Africa      | --         | -- | -- | -- | --    |
| <i>O. oenanthe</i>                 | Occasional  | Pair        | Palaearctic | [615, 777] | -- | -- | -- | --    |
| <i>O. lugens</i>                   | Pair        | Pair        | Palaearctic | [777]      | -- | -- | -- | --    |
| <i>O. lugentoides</i>              | Subspp      | Subspp      | Palaearctic | --         | -- | -- | -- | --    |
| <i>O. lugubris</i>                 | Cooperation | Cooperation | Africa      | [503, 777] | -- | -- | -- | --    |

|                                     |             |             |             |                 |    |    |    |    |
|-------------------------------------|-------------|-------------|-------------|-----------------|----|----|----|----|
| <i>O. finschii</i>                  | Pair        | Pair        | Palaearctic | [777]           | -- | -- | -- | -- |
| <i>O. picata</i>                    | Pair        | Pair        | Indomalayan | --              | -- | -- | -- | -- |
| <i>O. moesta</i>                    | Pair        | Pair        | Palaearctic | --              | -- | -- | -- | -- |
| <i>O. hispanica</i>                 | Pair        | Pair        | Palaearctic | --              | -- | -- | -- | -- |
| <i>O. pleschanka</i>                | Pair        | Pair        | Palaearctic | --              | -- | -- | -- | -- |
| <i>O. cyprica</i>                   | Pair        | Pair        | Palaearctic | --              | -- | -- | -- | -- |
| <i>O. xanthoprymna</i>              | Unknown     | Pair        | Palaearctic | --              | -- | -- | -- | -- |
| <i>O. deserti</i>                   | Pair        | Pair        | Palaearctic | --              | -- | -- | -- | -- |
| <i>O. pileata</i>                   | Pair        | Pair        | Africa      | --              | -- | -- | -- | -- |
| <i>O. isabellina</i>                | Pair        | Pair        | Palaearctic | --              | -- | -- | -- | -- |
| <i>O. bottae</i>                    | Unknown     | Pair        | Africa      | --              | -- | -- | -- | -- |
| <i>O. heuglini</i>                  | Pair        | Pair        | Africa      | --              | -- | -- | -- | -- |
| <i>Cercomela sinuata</i>            | Pair        | Pair        | Africa      | --              | -- | -- | -- | -- |
| <i>C. schlegelii</i>                | Pair        | Pair        | Africa      | --              | -- | -- | -- | -- |
| <i>C. tractrac</i>                  | Pair        | Pair        | Africa      | --              | -- | -- | -- | -- |
| <i>C. familiaris</i>                | Pair        | Pair        | Africa      | --              | -- | -- | -- | -- |
| <i>C. scotocerca</i>                | Unknown     | Pair        | Africa      | --              | -- | -- | -- | -- |
| <i>C. fusca</i>                     | Pair        | Pair        | Indomalayan | --              | -- | -- | -- | -- |
| <i>C. dubia</i>                     | Unknown     | Pair        | Africa      | --              | -- | -- | -- | -- |
| <i>C. melanura</i>                  | Pair        | Pair        | Africa      | --              | -- | -- | -- | -- |
| <i>Pinarochroa sordida</i>          | Pair        | Pair        | Africa      | --              | -- | -- | -- | -- |
| <i>Myrmecocichla tholloni</i>       | Unknown     | Cooperation | Africa      | --              | -- | -- | -- | -- |
| <i>M. aethiops</i>                  | Cooperation | Cooperation | Africa      | [503, 777]      | -- | -- | -- | -- |
| <i>M. formicivora</i>               | Cooperation | Cooperation | Africa      | [503, 777, 786] | -- | -- | -- | -- |
| <i>M. nigra</i>                     | Unknown     | Cooperation | Africa      | [777]           | -- | -- | -- | -- |
| <i>M. melaena</i>                   | Unknown     | Cooperation | Africa      | --              | -- | -- | -- | -- |
| <i>M. albifrons</i>                 | Unknown     | Cooperation | Africa      | --              | -- | -- | -- | -- |
| <i>M. arnotti</i>                   | Cooperation | Cooperation | Africa      | [777, 787]      | -- | -- | -- | -- |
| <i>Thamnolaea cinnamomeiventris</i> | Pair        | Pair        | Africa      | [777]           | -- | -- | -- | -- |
| <i>T. coronata</i>                  | Subspp      | Subspp      | Africa      | --              | -- | -- | -- | -- |
| <i>T. semirufa</i>                  | Unknown     | Pair        | Africa      | --              | -- | -- | -- | -- |
| <i>Pinarornis plumosus</i>          | Pair        | Pair        | Africa      | --              | -- | -- | -- | -- |
| <i>Monticola sharpei</i>            | Unknown     | Pair        | Africa      | --              | -- | -- | -- | -- |
| <i>M. bensoni</i>                   | Unknown     | Pair        | Africa      | --              | -- | -- | -- | -- |
| <i>M. imerinus</i>                  | Unknown     | Pair        | Africa      | --              | -- | -- | -- | -- |
| <i>M. rupestris</i>                 | Pair        | Pair        | Africa      | --              | -- | -- | -- | -- |
| <i>M. explorator</i>                | Pair        | Pair        | Africa      | --              | -- | -- | -- | -- |
| <i>M. brevipes</i>                  | Pair        | Pair        | Africa      | --              | -- | -- | -- | -- |
| <i>M. pretoriae</i>                 | Subspp      | Subspp      | Africa      | --              | -- | -- | -- | -- |
| <i>M. angolensis</i>                | Pair        | Pair        | Africa      | --              | -- | -- | -- | -- |
| <i>M. saxatilis</i>                 | Occasional  | Pair        | Palaearctic | [615, 777]      | -- | -- | -- | -- |
| <i>M. rufocinereus</i>              | Pair        | Pair        | Africa      | [777]           | -- | -- | -- | -- |
| <i>M. cinclorhynchus</i>            | Pair        | Pair        | Palaearctic | --              | -- | -- | -- | -- |

|                                |         |        |             |            |                        |       |     |       |
|--------------------------------|---------|--------|-------------|------------|------------------------|-------|-----|-------|
| <i>M. gularis</i>              | Pair    | Pair   | Palaearctic | --         | --                     | --    | --  | --    |
| <i>M. rufiventris</i>          | Pair    | Pair   | Palaearctic | --         | --                     | --    | --  | --    |
| <i>M. solitarius</i>           | Pair    | Pair   | Palaearctic | --         | --                     | --    | --  | --    |
| <i>Myophonus blighi</i>        | Pair    | Pair   | Indomalayan | [455, 777] | --                     | --    | --  | --    |
| <i>M. melanurus</i>            | Unknown | Pair   | Indomalayan | [777]      | --                     | --    | --  | --    |
| <i>M. glaucinus</i>            | Unknown | Pair   | Indomalayan | --         | --                     | --    | --  | --    |
| <i>M. robinsoni</i>            | Unknown | Pair   | Indomalayan | --         | --                     | --    | --  | --    |
| <i>M. horsfieldii</i>          | Pair    | Pair   | Indomalayan | --         | --                     | --    | --  | --    |
| <i>M. caeruleus</i>            | Pair    | Pair   | Indomalayan | --         | --                     | --    | --  | --    |
| <i>M. insularis</i>            | Pair    | Pair   | Palaearctic | --         | --                     | --    | --  | --    |
| <i>Brachypteryx stellata</i>   | Unknown | Pair   | Indomalayan | --         | --                     | --    | --  | --    |
| <i>B. hyperythra</i>           | Unknown | Pair   | Indomalayan | --         | --                     | --    | --  | --    |
| <i>B. leucophrys</i>           | Pair    | Pair   | Indomalayan | --         | --                     | --    | --  | --    |
| <i>B. montana</i>              | Pair    | Pair   | Indomalayan | --         | --                     | --    | --  | --    |
| <i>Alethe poliocephala</i>     | Unknown | Pair   | Africa      | --         | --                     | --    | --  | --    |
| <i>A. poliophrys</i>           | Unknown | Pair   | Africa      | --         | --                     | --    | --  | --    |
| <i>A. fuelleborni</i>          | Pair    | Pair   | Africa      | --         | --                     | --    | --  | --    |
| <i>A. choloensis</i>           | Unknown | Pair   | Africa      | --         | --                     | --    | --  | --    |
| <i>A. diademata</i>            | Pair    | Pair   | Africa      | --         | --                     | --    | --  | --    |
| <i>A. castanea</i>             | Pair    | Pair   | Africa      | --         | --                     | --    | --  | --    |
| <b>Muscicapoidea: Turdidae</b> |         |        |             |            |                        |       |     |       |
| <i>Zoothera schistacea</i>     | Unknown | Pair   | Australia   | [777]      | bbbbbbbbbbbbbbbabbbbbb | [755] | aa  | [788] |
| <i>Z. wardii</i>               | Pair    | Pair   | Palaearctic | --         | --                     | --    | --  | --    |
| <i>Z. cinerea</i>              | Unknown | Pair   | Indomalayan | --         | --                     | --    | --  | --    |
| <i>Z. everetti</i>             | Unknown | Pair   | Indomalayan | --         | --                     | --    | --  | --    |
| <i>Z. sibirica</i>             | Pair    | Pair   | Palaearctic | --         | --                     | --    | --  | --    |
| <i>Z. spiloptera</i>           | Pair    | Pair   | Indomalayan | --         | --                     | --    | --  | --    |
| <i>Z. andromedae</i>           | Unknown | Pair   | Indomalayan | --         | --                     | --    | --  | --    |
| <i>Z. mollissima</i>           | Pair    | Pair   | Palaearctic | --         | --                     | --    | --  | --    |
| <i>Z. dixonii</i>              | Unknown | Pair   | Palaearctic | --         | --                     | --    | --  | --    |
| <i>Z. dauma</i>                | Pair    | Pair   | Palaearctic | --         | --                     | --    | --  | --    |
| <i>Z. major</i>                | Subspp  | Subspp | Palaearctic | --         | --                     | --    | --  | --    |
| <i>Z. horsfieldii</i>          | Unknown | Pair   | Indomalayan | --         | --                     | --    | --  | --    |
| <i>Z. machiki</i>              | Unknown | Pair   | Australia   | --         | --                     | --    | --  | --    |
| <i>Z. lunulata</i>             | Pair    | Pair   | Australia   | --         | --                     | --    | --  | --    |
| <i>Z. heinei</i>               | Pair    | Pair   | Australia   | --         | --                     | --    | --  | --    |
| <i>Z. talaseae</i>             | Unknown | Pair   | Australia   | --         | --                     | --    | --  | --    |
| <i>Z. margaretae</i>           | Unknown | Pair   | Australia   | --         | --                     | --    | --  | --    |
| <i>Z. monticola</i>            | Unknown | Pair   | Indomalayan | --         | --                     | --    | --  | --    |
| <i>Z. marginata</i>            | Pair    | Pair   | Indomalayan | --         | --                     | --    | --  | --    |
| <i>Ixoreus naevius</i>         | Pair    | Pair   | Nearctic    | --         | --                     | --    | aba | --    |
| <i>Ridgwayia pinicola</i>      | Unknown | Pair   | Neotropical | --         | --                     | --    | --  | --    |
| <i>Cichlopsis leucogenys</i>   | Unknown | Pair   | Neotropical | --         | --                     | --    | --  | --    |

|                                  |             |             |             |            |    |    |      |    |
|----------------------------------|-------------|-------------|-------------|------------|----|----|------|----|
| <i>Entomodestes leucotis</i>     | Unknown     | Pair        | Neotropical | --         | -- | -- | --   | -- |
| <i>E. coracinus</i>              | Unknown     | Pair        | Neotropical | --         | -- | -- | --   | -- |
| <i>Catharus gracilirostris</i>   | Unknown     | Pair        | Neotropical | --         | -- | -- | --   | -- |
| <i>C. aurantirostris</i>         | Unknown     | Pair        | Neotropical | --         | -- | -- | --   | -- |
| <i>C. fuscater</i>               | Unknown     | Pair        | Neotropical | --         | -- | -- | --   | -- |
| <i>C. occidentalis</i>           | Unknown     | Pair        | Neotropical | --         | -- | -- | --   | -- |
| <i>C. frantzii</i>               | Pair        | Pair        | Neotropical | --         | -- | -- | --   | -- |
| <i>C. mexicanus</i>              | Unknown     | Pair        | Neotropical | --         | -- | -- | --   | -- |
| <i>C. dryas</i>                  | Unknown     | Pair        | Neotropical | --         | -- | -- | --   | -- |
| <i>C. fuscescens</i>             | Pair        | Pair        | Nearctic    | --         | -- | -- | --   | -- |
| <i>C. minimus</i>                | Pair        | Pair        | Nearctic    | --         | -- | -- | --   | -- |
| <i>C. bicknelli</i>              | Cooperation | Cooperation | Nearctic    | [789, 790] | -- | -- | --   | -- |
| <i>C. ustulatus</i>              | Pair        | Pair        | Nearctic    | [777]      | -- | -- | --   | -- |
| <i>C. guttatus</i>               | Pair        | Pair        | Nearctic    | --         | -- | -- | --   | -- |
| <i>Hylocichla mustelinus</i>     | Pair        | Pair        | Nearctic    | --         | -- | -- | --   | -- |
| <i>Zoothera dumasi</i>           | Unknown     | Pair        | Australia   | --         | -- | -- | abba | -- |
| <i>Z. interpres</i>              | Pair        | Pair        | Indomalayan | --         | -- | -- | --   | -- |
| <i>Z. erythronota</i>            | Unknown     | Pair        | Australia   | --         | -- | -- | --   | -- |
| <i>Z. dohertyi</i>               | Unknown     | Pair        | Australia   | --         | -- | -- | --   | -- |
| <i>Z. peronii</i>                | Unknown     | Pair        | Australia   | --         | -- | -- | --   | -- |
| <i>Z. citrina</i>                | Pair        | Pair        | Indomalayan | --         | -- | -- | --   | -- |
| <i>Z. piaggiae</i>               | Pair        | Pair        | Africa      | --         | -- | -- | --   | -- |
| <i>Z. tanganjicae</i>            | Subspp      | Subspp      | Africa      | --         | -- | -- | --   | -- |
| <i>Z. crossleyi</i>              | Unknown     | Pair        | Africa      | --         | -- | -- | --   | -- |
| <i>Z. gurneyi</i>                | Pair        | Pair        | Africa      | --         | -- | -- | --   | -- |
| <i>Z. oberlaenderi</i>           | Unknown     | Pair        | Africa      | --         | -- | -- | --   | -- |
| <i>Z. cameronensis</i>           | Unknown     | Pair        | Africa      | --         | -- | -- | --   | -- |
| <i>Z. princei</i>                | Pair        | Pair        | Africa      | --         | -- | -- | --   | -- |
| <i>Z. kibalensis</i>             | Subspp      | Subspp      | Africa      | --         | -- | -- | --   | -- |
| <i>Z. guttata</i>                | Unknown     | Pair        | Africa      | --         | -- | -- | --   | -- |
| <i>Nesocichla eremita</i>        | Pair        | Pair        | Africa      | --         | -- | -- | abbb | -- |
| <i>Cichlherminia lherminieri</i> | Unknown     | Pair        | Neotropical | --         | -- | -- | --   | -- |
| <i>Psophocichla litsipsirupa</i> | Cooperation | Cooperation | Africa      | --         | -- | -- | --   | -- |
| <i>Turdus flavipes</i>           | Unknown     | Pair        | Neotropical | --         | -- | -- | --   | -- |
| <i>T. leucops</i>                | Unknown     | Pair        | Neotropical | --         | -- | -- | --   | -- |
| <i>T. pelios</i>                 | Pair        | Pair        | Africa      | --         | -- | -- | --   | -- |
| <i>T. tephronotus</i>            | Unknown     | Pair        | Africa      | --         | -- | -- | --   | -- |
| <i>T. libonyanus</i>             | Pair        | Pair        | Africa      | --         | -- | -- | --   | -- |
| <i>T. olivaceofuscus</i>         | Unknown     | Pair        | Africa      | --         | -- | -- | --   | -- |
| <i>T. olivaceus</i>              | Pair        | Pair        | Africa      | --         | -- | -- | --   | -- |
| <i>T. menachensis</i>            | Unknown     | Pair        | Palaearctic | --         | -- | -- | --   | -- |
| <i>T. bewsheri</i>               | Pair        | Pair        | Africa      | --         | -- | -- | --   | -- |
| <i>T. hortulorum</i>             | Pair        | Pair        | Palaearctic | --         | -- | -- | --   | -- |

|                          |         |        |             |    |    |    |    |    |
|--------------------------|---------|--------|-------------|----|----|----|----|----|
| <i>T. unicolor</i>       | Pair    | Pair   | Palaearctic | -- | -- | -- | -- | -- |
| <i>T. dissimilis</i>     | Pair    | Pair   | Palaearctic | -- | -- | -- | -- | -- |
| <i>T. cardis</i>         | Pair    | Pair   | Palaearctic | -- | -- | -- | -- | -- |
| <i>T. albocinctus</i>    | Pair    | Pair   | Palaearctic | -- | -- | -- | -- | -- |
| <i>T. torquatus</i>      | Pair    | Pair   | Palaearctic | -- | -- | -- | -- | -- |
| <i>T. boulboul</i>       | Pair    | Pair   | Palaearctic | -- | -- | -- | -- | -- |
| <i>T. merula</i>         | Pair    | Pair   | Palaearctic | -- | -- | -- | -- | -- |
| <i>T. poliocephalus</i>  | Pair    | Pair   | Indomalayan | -- | -- | -- | -- | -- |
| <i>T. rubrocanus</i>     | Pair    | Pair   | Palaearctic | -- | -- | -- | -- | -- |
| <i>T. kessleri</i>       | Unknown | Pair   | Palaearctic | -- | -- | -- | -- | -- |
| <i>T. feae</i>           | Pair    | Pair   | Palaearctic | -- | -- | -- | -- | -- |
| <i>T. obscurus</i>       | Pair    | Pair   | Palaearctic | -- | -- | -- | -- | -- |
| <i>T. pallidus</i>       | Pair    | Pair   | Palaearctic | -- | -- | -- | -- | -- |
| <i>T. chrysolaeus</i>    | Pair    | Pair   | Palaearctic | -- | -- | -- | -- | -- |
| <i>T. celaenops</i>      | Pair    | Pair   | Palaearctic | -- | -- | -- | -- | -- |
| <i>T. ruficollis</i>     | Pair    | Pair   | Palaearctic | -- | -- | -- | -- | -- |
| <i>T. naumanni</i>       | Pair    | Pair   | Palaearctic | -- | -- | -- | -- | -- |
| <i>T. pilaris</i>        | Pair    | Pair   | Palaearctic | -- | -- | -- | -- | -- |
| <i>T. iliacus</i>        | Pair    | Pair   | Palaearctic | -- | -- | -- | -- | -- |
| <i>T. philomelos</i>     | Pair    | Pair   | Palaearctic | -- | -- | -- | -- | -- |
| <i>T. mupinensis</i>     | Unknown | Pair   | Palaearctic | -- | -- | -- | -- | -- |
| <i>T. viscivorus</i>     | Pair    | Pair   | Palaearctic | -- | -- | -- | -- | -- |
| <i>T. aurantius</i>      | Pair    | Pair   | Neotropical | -- | -- | -- | -- | -- |
| <i>T. plumbeus</i>       | Pair    | Pair   | Neotropical | -- | -- | -- | -- | -- |
| <i>T. chiguanco</i>      | Unknown | Pair   | Neotropical | -- | -- | -- | -- | -- |
| <i>T. nigrescens</i>     | Unknown | Pair   | Neotropical | -- | -- | -- | -- | -- |
| <i>T. fuscater</i>       | Pair    | Pair   | Neotropical | -- | -- | -- | -- | -- |
| <i>T. infuscatus</i>     | Unknown | Pair   | Neotropical | -- | -- | -- | -- | -- |
| <i>T. serranus</i>       | Pair    | Pair   | Neotropical | -- | -- | -- | -- | -- |
| <i>T. nigriceps</i>      | Unknown | Pair   | Neotropical | -- | -- | -- | -- | -- |
| <i>T. subalaris</i>      | Subspp  | Subspp | Neotropical | -- | -- | -- | -- | -- |
| <i>T. reevei</i>         | Unknown | Pair   | Neotropical | -- | -- | -- | -- | -- |
| <i>T. olivater</i>       | Unknown | Pair   | Neotropical | -- | -- | -- | -- | -- |
| <i>T. maranonicus</i>    | Unknown | Pair   | Neotropical | -- | -- | -- | -- | -- |
| <i>T. fulviventris</i>   | Unknown | Pair   | Neotropical | -- | -- | -- | -- | -- |
| <i>T. rufiventris</i>    | Pair    | Pair   | Neotropical | -- | -- | -- | -- | -- |
| <i>T. falcklandii</i>    | Pair    | Pair   | Neotropical | -- | -- | -- | -- | -- |
| <i>T. leucomelas</i>     | Pair    | Pair   | Neotropical | -- | -- | -- | -- | -- |
| <i>T. amaurochalinus</i> | Pair    | Pair   | Neotropical | -- | -- | -- | -- | -- |
| <i>T. plebejus</i>       | Pair    | Pair   | Neotropical | -- | -- | -- | -- | -- |
| <i>T. ignobilis</i>      | Unknown | Pair   | Neotropical | -- | -- | -- | -- | -- |
| <i>T. lawrencii</i>      | Unknown | Pair   | Neotropical | -- | -- | -- | -- | -- |
| <i>T. obsoletus</i>      | Pair    | Pair   | Neotropical | -- | -- | -- | -- | -- |



|                                  |             |             |             |                 |             |                 |          |    |
|----------------------------------|-------------|-------------|-------------|-----------------|-------------|-----------------|----------|----|
| <i>T. fumigatus</i>              | Pair        | Pair        | Neotropical | --              | --          | --              | --       | -- |
| <i>T. hauxwelli</i>              | Unknown     | Pair        | Neotropical | --              | --          | --              | --       | -- |
| <i>T. grayi</i>                  | Pair        | Pair        | Neotropical | --              | --          | --              | --       | -- |
| <i>T. nudigenis</i>              | Pair        | Pair        | Neotropical | --              | --          | --              | --       | -- |
| <i>T. maculirostris</i>          | Unknown     | Pair        | Neotropical | --              | --          | --              | --       | -- |
| <i>T. haplochrous</i>            | Unknown     | Pair        | Neotropical | --              | --          | --              | --       | -- |
| <i>T. jamaicensis</i>            | Unknown     | Pair        | Neotropical | --              | --          | --              | --       | -- |
| <i>T. assimilis</i>              | Subspp      | Subspp      | Neotropical | --              | --          | --              | --       | -- |
| <i>T. albicollis</i>             | Pair        | Pair        | Neotropical | --              | --          | --              | --       | -- |
| <i>T. rufopalliatus</i>          | Unknown     | Pair        | Neotropical | --              | --          | --              | --       | -- |
| <i>T. graysoni</i>               | Subspp      | Subspp      | Neotropical | --              | --          | --              | --       | -- |
| <i>T. swalesi</i>                | Unknown     | Pair        | Neotropical | --              | --          | --              | --       | -- |
| <i>T. migratorius</i>            | Pair        | Pair        | Nearctic    | --              | --          | --              | --       | -- |
| <i>T. rufitorques</i>            | Unknown     | Pair        | Neotropical | --              | --          | --              | --       | -- |
| <i>Cochoa purpurea</i>           | Pair        | Pair        | Indomalayan | --              | --          | [756, 788]      | abbc     | -- |
| <i>C. viridis</i>                | Unknown     | Pair        | Indomalayan | --              | --          | --              | --       | -- |
| <i>C. beccarii</i>               | Unknown     | Pair        | Indomalayan | --              | --          | --              | --       | -- |
| <i>C. azurea</i>                 | Unknown     | Pair        | Indomalayan | --              | --          | --              | --       | -- |
| <i>Chlamydochaera jefferyi</i>   | Unknown     | Pair        | Indomalayan | --              | --          | [755]           | --       | -- |
| <i>Stizorhina finschii</i>       | Unknown     | Pair        | Africa      | --              | --          | --              | b        | -- |
| <i>S. fraseri</i>                | Pair        | Pair        | Africa      | --              | --          | --              | --       | -- |
| <i>Neocossyphus rufus</i>        | Pair        | Pair        | Africa      | --              | --          | --              | --       | -- |
| <i>N. poensis</i>                | Unknown     | Pair        | Africa      | --              | --          | --              | --       | -- |
| <i>Sialia sialis</i>             | Occasional  | Pair        | Nearctic    | [777, 791]      | --          | --              | --       | -- |
| <i>S. mexicana</i>               | Cooperation | Cooperation | Nearctic    | [777, 792, 793] | --          | --              | --       | -- |
| <i>S. currucoides</i>            | Occasional  | Pair        | Nearctic    | [777, 794]      | --          | --              | --       | -- |
| <i>Myadestes myadestinus</i>     | Unknown     | Pair        | Neotropical | [777]           | --          | --              | --       | -- |
| <i>M. lanaiensis</i>             | Unknown     | Pair        | Neotropical | --              | --          | --              | --       | -- |
| <i>M. obscurus</i>               | Pair        | Pair        | Neotropical | --              | --          | --              | --       | -- |
| <i>M. palmeri</i>                | Cooperation | Cooperation | Neotropical | [777, 795]      | --          | --              | --       | -- |
| <i>M. townsendi</i>              | Pair        | Pair        | Nearctic    | [777]           | --          | --              | --       | -- |
| <i>M. occidentalis</i>           | Unknown     | Pair        | Neotropical | --              | --          | --              | --       | -- |
| <i>M. elisabeth</i>              | Unknown     | Pair        | Neotropical | --              | --          | --              | --       | -- |
| <i>M. genibarbis</i>             | Unknown     | Pair        | Neotropical | --              | --          | --              | --       | -- |
| <i>M. melanops</i>               | Pair        | Pair        | Neotropical | --              | --          | --              | --       | -- |
| <i>M. coloratus</i>              | Unknown     | Pair        | Neotropical | --              | --          | --              | --       | -- |
| <i>M. ralloides</i>              | Unknown     | Pair        | Neotropical | --              | --          | --              | --       | -- |
| <i>M. unicolor</i>               | Unknown     | Pair        | Neotropical | --              | --          | --              | --       | -- |
| <i>Cataponera turdoides</i>      | Unknown     | Pair        | Indomalayan | --              | --          | --              | Untested | -- |
| <i>Geomalia heinrichi</i>        | Unknown     | Pair        | Australia   | --              | --          | --              | --       | -- |
| <i>Heinrichia calligyna</i>      | Unknown     | Pair        | Australia   | --              | --          | --              | --       | -- |
| <b>Passeroidea: Promeropidae</b> |             |             |             |                 |             |                 |          |    |
| <i>Modulatrix stictigula</i>     | Unknown     | Cooperation | Africa      | [503]           | bbdbbbbbbba | [433, 591, 796] |          |    |

|                               |         |        |             |       |                  |            |
|-------------------------------|---------|--------|-------------|-------|------------------|------------|
| <i>Arcanator orostruthus</i>  | Unknown | Pair   | Africa      | --    | --               | --         |
| <i>Promerops gurneyi</i>      | Pair    | Pair   | Africa      | [797] | --               | --         |
| <i>P. cafer</i>               | Pair    | Pair   | Africa      | --    | --               | --         |
| <b>Passeroidea: Dicaeidae</b> |         |        |             |       |                  |            |
| <i>Prionochilus olivaceus</i> | Unknown | Pair   | Indomalayan | [797] | bbdbbbbbbbbbbbba | [433, 796] |
| <i>P. maculatus</i>           | Unknown | Pair   | Indomalayan | --    | --               | --         |
| <i>P. percussus</i>           | Unknown | Pair   | Indomalayan | --    | --               | --         |
| <i>P. plateni</i>             | Unknown | Pair   | Indomalayan | --    | --               | --         |
| <i>P. xanthopygius</i>        | Unknown | Pair   | Indomalayan | --    | --               | --         |
| <i>P. thoracicus</i>          | Unknown | Pair   | Indomalayan | --    | --               | --         |
| <i>Dicaeum annae</i>          | Unknown | Pair   | Indomalayan | --    | --               | --         |
| <i>D. agile</i>               | Pair    | Pair   | Indomalayan | --    | --               | --         |
| <i>D. aeruginosum</i>         | Subspp  | Subspp | Indomalayan | --    | --               | --         |
| <i>D. everetti</i>            | Unknown | Pair   | Indomalayan | --    | --               | --         |
| <i>D. proprium</i>            | Unknown | Pair   | Indomalayan | --    | --               | --         |
| <i>D. chrysorrhoeum</i>       | Pair    | Pair   | Indomalayan | --    | --               | --         |
| <i>D. melanoxanthum</i>       | Unknown | Pair   | Indomalayan | --    | --               | --         |
| <i>D. vincens</i>             | Unknown | Pair   | Indomalayan | --    | --               | --         |
| <i>D. aureolimbatum</i>       | Unknown | Pair   | Indomalayan | --    | --               | --         |
| <i>D. nigrilore</i>           | Unknown | Pair   | Indomalayan | --    | --               | --         |
| <i>D. anthonyi</i>            | Unknown | Pair   | Indomalayan | --    | --               | --         |
| <i>D. bicolor</i>             | Unknown | Pair   | Indomalayan | --    | --               | --         |
| <i>D. quadricolor</i>         | Unknown | Pair   | Indomalayan | --    | --               | --         |
| <i>D. australe</i>            | Unknown | Pair   | Indomalayan | --    | --               | --         |
| <i>D. retrocinctum</i>        | Unknown | Pair   | Indomalayan | --    | --               | --         |
| <i>D. trigonostigma</i>       | Unknown | Pair   | Indomalayan | --    | --               | --         |
| <i>D. hypoleucum</i>          | Unknown | Pair   | Indomalayan | --    | --               | --         |
| <i>D. erythrorhynchos</i>     | Pair    | Pair   | Indomalayan | --    | --               | --         |
| <i>D. concolor</i>            | Pair    | Pair   | Indomalayan | --    | --               | --         |
| <i>D. pygmaeum</i>            | Unknown | Pair   | Indomalayan | --    | --               | --         |
| <i>D. nehrkorni</i>           | Unknown | Pair   | Indomalayan | --    | --               | --         |
| <i>D. erythrothorax</i>       | Unknown | Pair   | Indomalayan | --    | --               | --         |
| <i>D. vulneratum</i>          | Unknown | Pair   | Indomalayan | --    | --               | --         |
| <i>D. pectorale</i>           | Unknown | Pair   | Australia   | --    | --               | --         |
| <i>D. geelvinkianum</i>       | Unknown | Pair   | Australia   | --    | --               | --         |
| <i>D. nitidum</i>             | Unknown | Pair   | Australia   | --    | --               | --         |
| <i>D. eximium</i>             | Unknown | Pair   | Australia   | --    | --               | --         |
| <i>D. aeneum</i>              | Unknown | Pair   | Australia   | --    | --               | --         |
| <i>D. tristrami</i>           | Unknown | Pair   | Australia   | --    | --               | --         |
| <i>D. igniferum</i>           | Unknown | Pair   | Indomalayan | --    | --               | --         |
| <i>D. mauei</i>               | Unknown | Pair   | Indomalayan | --    | --               | --         |
| <i>D. ignipectus</i>          | Unknown | Pair   | Indomalayan | --    | --               | --         |
| <i>D. monticulum</i>          | Unknown | Pair   | Indomalayan | --    | --               | --         |

|                                   |             |             |             |            |             |            |
|-----------------------------------|-------------|-------------|-------------|------------|-------------|------------|
| <i>D. celebicum</i>               | Unknown     | Pair        | Indomalayan | --         | --          | --         |
| <i>D. sanguinolentum</i>          | Unknown     | Pair        | Indomalayan | --         | --          | --         |
| <i>D. hirundinaceum</i>           | Pair        | Pair        | Australia   | --         | --          | --         |
| <i>D. cruentatum</i>              | Pair        | Pair        | Indomalayan | --         | --          | --         |
| <i>D. trochileum</i>              | Unknown     | Pair        | Indomalayan | --         | --          | --         |
| <b>Passeroidea: Nectariniidae</b> |             |             |             |            |             |            |
| <i>Anthreptes fraseri</i>         | Pair        | Pair        | Africa      | [512, 797] | bbdbbbbbbba | [433, 796] |
| <i>A. axillaris</i>               | Subspp      | Subspp      | Africa      | --         | --          | --         |
| <i>A. reichenowi</i>              | Pair        | Pair        | Africa      | --         | --          | --         |
| <i>A. anchietae</i>               | Unknown     | Pair        | Africa      | --         | --          | --         |
| <i>A. simplex</i>                 | Unknown     | Pair        | Indomalayan | [797]      | --          | --         |
| <i>A. malacensis</i>              | Pair        | Pair        | Indomalayan | --         | --          | --         |
| <i>A. rhodolaema</i>              | Pair        | Pair        | Indomalayan | --         | --          | --         |
| <i>A. singalensis</i>             | Pair        | Pair        | Indomalayan | --         | --          | --         |
| <i>A. gabonicus</i>               | Pair        | Pair        | Africa      | [512, 797] | --          | --         |
| <i>A. longuemarei</i>             | Pair        | Pair        | Africa      | --         | --          | --         |
| <i>A. orientalis</i>              | Unknown     | Pair        | Africa      | --         | --          | --         |
| <i>A. neglectus</i>               | Pair        | Pair        | Africa      | --         | --          | --         |
| <i>A. aurantium</i>               | Pair        | Pair        | Africa      | --         | --          | --         |
| <i>A. pallidigaster</i>           | Pair        | Pair        | Africa      | --         | --          | --         |
| <i>A. rectirostris</i>            | Cooperation | Cooperation | Africa      | --         | --          | --         |
| <i>A. rubritorques</i>            | Female only | Female only | Africa      | --         | --          | --         |
| <i>A. collaris</i>                | Pair        | Pair        | Africa      | --         | --          | --         |
| <i>A. platurus</i>                | Pair        | Pair        | Africa      | --         | --          | --         |
| <i>A. metallicus</i>              | Pair        | Pair        | Africa      | --         | --          | --         |
| <i>Hypogramma hypogrammicum</i>   | Pair        | Pair        | Indomalayan | [797]      | --          | --         |
| <i>Nectarinia seimundi</i>        | Unknown     | Pair        | Africa      | [512, 797] | --          | --         |
| <i>N. batesi</i>                  | Unknown     | Pair        | Africa      | --         | --          | --         |
| <i>N. olivacea</i>                | Female only | Female only | Africa      | --         | --          | --         |
| <i>N. violacea</i>                | Pair        | Pair        | Africa      | --         | --          | --         |
| <i>N. veroxii</i>                 | Unknown     | Pair        | Africa      | --         | --          | --         |
| <i>N. reichenbachii</i>           | Pair        | Pair        | Africa      | --         | --          | --         |
| <i>N. hartlaubii</i>              | Unknown     | Pair        | Africa      | --         | --          | --         |
| <i>N. newtonii</i>                | Unknown     | Cooperation | Africa      | --         | --          | --         |
| <i>N. thomensis</i>               | Unknown     | Pair        | Africa      | --         | --          | --         |
| <i>N. oritis</i>                  | Pair        | Pair        | Africa      | --         | --          | --         |
| <i>N. alinae</i>                  | Pair        | Pair        | Africa      | --         | --          | --         |
| <i>N. verticalis</i>              | Pair        | Pair        | Africa      | --         | --          | --         |
| <i>N. bannermani</i>              | Unknown     | Pair        | Africa      | --         | --          | --         |
| <i>N. cyanolaema</i>              | Unknown     | Female only | Africa      | --         | --          | --         |
| <i>N. balfouri</i>                | Pair        | Pair        | Africa      | --         | --          | --         |
| <i>N. dussumieri</i>              | Cooperation | Cooperation | Africa      | [539, 797] | --          | --         |
| <i>N. fuliginosa</i>              | Unknown     | Female only | Africa      | [512, 797] | --          | --         |

|                        |             |             |             |            |    |    |
|------------------------|-------------|-------------|-------------|------------|----|----|
| <i>N. amethystina</i>  | Female only | Female only | Africa      | --         | -- | -- |
| <i>N. rubescens</i>    | Unknown     | Female only | Africa      | --         | -- | -- |
| <i>N. senegalensis</i> | Pair        | Pair        | Africa      | --         | -- | -- |
| <i>N. hunteri</i>      | Unknown     | Pair        | Africa      | --         | -- | -- |
| <i>N. adelberti</i>    | Unknown     | Pair        | Africa      | --         | -- | -- |
| <i>N. zeylonica</i>    | Occasional  | Pair        | Indomalayan | [797, 798] | -- | -- |
| <i>N. minima</i>       | Unknown     | Pair        | Indomalayan | [797]      | -- | -- |
| <i>N. sperata</i>      | Unknown     | Pair        | Indomalayan | --         | -- | -- |
| <i>N. aspasia</i>      | Unknown     | Pair        | Australia   | --         | -- | -- |
| <i>N. calcostetha</i>  | Unknown     | Pair        | Indomalayan | --         | -- | -- |
| <i>N. jugularis</i>    | Pair        | Pair        | Widespread  | --         | -- | -- |
| <i>N. buettikoferi</i> | Unknown     | Pair        | Indomalayan | --         | -- | -- |
| <i>N. solaris</i>      | Unknown     | Pair        | Indomalayan | --         | -- | -- |
| <i>N. sovimanga</i>    | Female only | Female only | Africa      | --         | -- | -- |
| <i>N. humbloti</i>     | Unknown     | Pair        | Africa      | --         | -- | -- |
| <i>N. comorensis</i>   | Unknown     | Pair        | Africa      | --         | -- | -- |
| <i>N. coquerellii</i>  | Unknown     | Pair        | Africa      | --         | -- | -- |
| <i>N. venusta</i>      | Pair        | Pair        | Africa      | [512, 797] | -- | -- |
| <i>N. ursulae</i>      | Pair        | Pair        | Africa      | --         | -- | -- |
| <i>N. talatala</i>     | Pair        | Pair        | Africa      | --         | -- | -- |
| <i>N. oustaleti</i>    | Unknown     | Pair        | Africa      | --         | -- | -- |
| <i>N. bouvieri</i>     | Unknown     | Pair        | Africa      | --         | -- | -- |
| <i>N. osea</i>         | Pair        | Pair        | Africa      | --         | -- | -- |
| <i>N. asiatica</i>     | Pair        | Pair        | Indomalayan | [797]      | -- | -- |
| <i>N. habessinica</i>  | Unknown     | Pair        | Africa      | [512, 797] | -- | -- |
| <i>N. lotenia</i>      | Pair        | Pair        | Indomalayan | [797]      | -- | -- |
| <i>N. manoensis</i>    | Pair        | Pair        | Africa      | [512, 797] | -- | -- |
| <i>N. chalybea</i>     | Pair        | Pair        | Africa      | --         | -- | -- |
| <i>N. ludovicensis</i> | Pair        | Pair        | Africa      | --         | -- | -- |
| <i>N. prigoginei</i>   | Unknown     | Pair        | Africa      | --         | -- | -- |
| <i>N. stuhlmanni</i>   | Unknown     | Pair        | Africa      | --         | -- | -- |
| <i>N. preussi</i>      | Pair        | Pair        | Africa      | --         | -- | -- |
| <i>N. afra</i>         | Pair        | Pair        | Africa      | --         | -- | -- |
| <i>N. mediocris</i>    | Pair        | Pair        | Africa      | --         | -- | -- |
| <i>N. neergaardi</i>   | Pair        | Pair        | Africa      | --         | -- | -- |
| <i>N. chloropygia</i>  | Pair        | Pair        | Africa      | --         | -- | -- |
| <i>N. minulla</i>      | Pair        | Pair        | Africa      | --         | -- | -- |
| <i>N. regia</i>        | Pair        | Pair        | Africa      | --         | -- | -- |
| <i>N. loveridgei</i>   | Pair        | Pair        | Africa      | --         | -- | -- |
| <i>N. moreaui</i>      | Unknown     | Pair        | Africa      | --         | -- | -- |
| <i>N. rockefelleri</i> | Unknown     | Pair        | Africa      | --         | -- | -- |
| <i>N. cuprea</i>       | Pair        | Pair        | Africa      | --         | -- | -- |
| <i>N. fusca</i>        | Pair        | Pair        | Africa      | --         | -- | -- |

|                                 |             |             |             |            |    |    |
|---------------------------------|-------------|-------------|-------------|------------|----|----|
| <i>N. rufipennis</i>            | Unknown     | Pair        | Africa      | --         | -- | -- |
| <i>N. tacazze</i>               | Pair        | Pair        | Africa      | --         | -- | -- |
| <i>N. purpureiventris</i>       | Unknown     | Pair        | Africa      | --         | -- | -- |
| <i>N. bocagii</i>               | Unknown     | Pair        | Africa      | --         | -- | -- |
| <i>N. kilimensis</i>            | Female only | Female only | Africa      | --         | -- | -- |
| <i>N. reichenowi</i>            | Unknown     | Female only | Africa      | --         | -- | -- |
| <i>N. famosa</i>                | Pair        | Pair        | Africa      | --         | -- | -- |
| <i>N. johnstoni</i>             | Female only | Female only | Africa      | --         | -- | -- |
| <i>N. shelleyi</i>              | Unknown     | Female only | Africa      | --         | -- | -- |
| <i>N. erythrocerca</i>          | Unknown     | Female only | Africa      | --         | -- | -- |
| <i>N. congensis</i>             | Unknown     | Female only | Africa      | --         | -- | -- |
| <i>N. mariquensis</i>           | Female only | Female only | Africa      | --         | -- | -- |
| <i>N. bifasciata</i>            | Pair        | Pair        | Africa      | --         | -- | -- |
| <i>N. pembae</i>                | Unknown     | Pair        | Africa      | --         | -- | -- |
| <i>N. notata</i>                | Female only | Female only | Africa      | [797]      | -- | -- |
| <i>N. coccinigaster</i>         | Unknown     | Pair        | Africa      | [512, 797] | -- | -- |
| <i>N. johannae</i>              | Unknown     | Pair        | Africa      | --         | -- | -- |
| <i>N. superba</i>               | Unknown     | Pair        | Africa      | --         | -- | -- |
| <i>N. pulchella</i>             | Unknown     | Pair        | Africa      | --         | -- | -- |
| <i>N. nectarinioides</i>        | Unknown     | Pair        | Africa      | --         | -- | -- |
| <i>Aethopyga primigenius</i>    | Unknown     | Pair        | Indomalayan | [797]      | -- | -- |
| <i>A. boltoni</i>               | Unknown     | Pair        | Indomalayan | --         | -- | -- |
| <i>A. flagrans</i>              | Unknown     | Pair        | Indomalayan | --         | -- | -- |
| <i>A. pulcherrima</i>           | Unknown     | Pair        | Indomalayan | --         | -- | -- |
| <i>A. duyvenbodei</i>           | Female only | Female only | Indomalayan | --         | -- | -- |
| <i>A. shelleyi</i>              | Unknown     | Pair        | Indomalayan | --         | -- | -- |
| <i>A. gouldiae</i>              | Unknown     | Pair        | Indomalayan | --         | -- | -- |
| <i>A. nipalensis</i>            | Unknown     | Pair        | Indomalayan | --         | -- | -- |
| <i>A. eximia</i>                | Unknown     | Pair        | Indomalayan | --         | -- | -- |
| <i>A. christinae</i>            | Unknown     | Pair        | Indomalayan | --         | -- | -- |
| <i>A. saturata</i>              | Pair        | Pair        | Indomalayan | --         | -- | -- |
| <i>A. siparaja</i>              | Unknown     | Pair        | Indomalayan | --         | -- | -- |
| <i>A. mystacalis</i>            | Unknown     | Pair        | Indomalayan | --         | -- | -- |
| <i>A. ignicauda</i>             | Unknown     | Pair        | Indomalayan | --         | -- | -- |
| <i>Arachnothera longirostra</i> | Pair        | Pair        | Indomalayan | --         | -- | -- |
| <i>A. crassirostris</i>         | Unknown     | Pair        | Indomalayan | --         | -- | -- |
| <i>A. robusta</i>               | Unknown     | Pair        | Indomalayan | --         | -- | -- |
| <i>A. flavigaster</i>           | Unknown     | Pair        | Indomalayan | --         | -- | -- |
| <i>A. chryso-genys</i>          | Unknown     | Pair        | Indomalayan | --         | -- | -- |
| <i>A. clarae</i>                | Unknown     | Pair        | Indomalayan | --         | -- | -- |
| <i>A. affinis</i>               | Unknown     | Pair        | Indomalayan | --         | -- | -- |
| <i>A. everetti</i>              | Unknown     | Pair        | Indomalayan | --         | -- | -- |
| <i>A. magna</i>                 | Pair        | Pair        | Indomalayan | --         | -- | -- |

|                                          |             |             |             |                 |                        |            |    |       |
|------------------------------------------|-------------|-------------|-------------|-----------------|------------------------|------------|----|-------|
| <i>A. juliae</i>                         | Unknown     | Pair        | Indomalayan | --              | --                     | --         |    |       |
| <b>Passeroidea: Irenidae</b>             |             |             |             |                 |                        |            |    |       |
| <i>Chloropsis flavipennis</i>            | Unknown     | Pair        | Indomalayan | [799]           | bbdbbbsbbsbbsbbsbbsbba | [433, 796] |    |       |
| <i>C. palawanensis</i>                   | Unknown     | Pair        | Indomalayan | --              | --                     | --         |    |       |
| <i>C. sonnerati</i>                      | Unknown     | Pair        | Indomalayan | --              | --                     | --         |    |       |
| <i>C. cyanopogon</i>                     | Unknown     | Pair        | Indomalayan | --              | --                     | --         |    |       |
| <i>C. cochinchinensis</i>                | Unknown     | Pair        | Indomalayan | --              | --                     | --         |    |       |
| <i>C. aurifrons</i>                      | Pair        | Pair        | Indomalayan | --              | --                     | --         |    |       |
| <i>C. hardwickii</i>                     | Unknown     | Pair        | Indomalayan | --              | --                     | --         |    |       |
| <i>C. venusta</i>                        | Unknown     | Pair        | Indomalayan | --              | --                     | --         |    |       |
| <i>Irena puella</i>                      | Pair        | Pair        | Indomalayan | [800]           | --                     | --         |    |       |
| <i>I. cyanogaster</i>                    | Unknown     | Pair        | Indomalayan | --              | --                     | --         |    |       |
| <b>Passeroidea: Prunellidae</b>          |             |             |             |                 |                        |            |    |       |
| <i>Prunella collaris</i>                 | Cooperation | Cooperation | Palaearctic | [801-803]       | bbdbbbsbbsbbsbbsbbsbba | [804]      |    |       |
| <i>P. himalayana</i>                     | Suspected   | Cooperation | Palaearctic | [803]           | --                     | --         |    |       |
| <i>P. rubeculoides</i>                   | Unknown     | Cooperation | Palaearctic | --              | --                     | --         |    |       |
| <i>P. strophliata</i>                    | Unknown     | Cooperation | Palaearctic | --              | --                     | --         |    |       |
| <i>P. montanella</i>                     | Unknown     | Cooperation | Palaearctic | --              | --                     | --         |    |       |
| <i>P. ocularis</i>                       | Unknown     | Cooperation | Palaearctic | --              | --                     | --         |    |       |
| <i>P. fagani</i>                         | Unknown     | Cooperation | Palaearctic | --              | --                     | --         |    |       |
| <i>P. fulvescens</i>                     | Cooperation | Cooperation | Palaearctic | --              | --                     | --         |    |       |
| <i>P. atrogularis</i>                    | Unknown     | Cooperation | Palaearctic | --              | --                     | --         |    |       |
| <i>P. koslowi</i>                        | Unknown     | Cooperation | Palaearctic | --              | --                     | --         |    |       |
| <i>P. modularis</i>                      | Cooperation | Cooperation | Palaearctic | --              | --                     | --         |    |       |
| <i>P. rubida</i>                         | Cooperation | Cooperation | Palaearctic | --              | --                     | --         |    |       |
| <i>P. immaculata</i>                     | Unknown     | Cooperation | Palaearctic | --              | --                     | --         |    |       |
| <b>Passeroidea: Peucedramidae</b>        |             |             |             |                 |                        |            |    |       |
| <i>Peucedramus taeniatus</i>             | Pair        | Pair        | Nearctic    | [805]           | bbdbbbsbbsbbsbbsbbsbab | [804]      |    |       |
| <b>Passeroidea: Ploceidae: Ploceinae</b> |             |             |             |                 |                        |            |    |       |
| <i>Bubalornis albirostris</i>            | Suspected   | Cooperation | Africa      | [775, 806, 807] | bbdbbbsbbsbbsbbsbbsbba | [804]      | a  | [808] |
| <i>B. niger</i>                          | Cooperation | Cooperation | Africa      | [807, 809]      | --                     | --         | -- | --    |
| <i>Dinemellia dinemelli</i>              | Suspected   | Cooperation | Africa      | [807, 810]      | --                     | --         | -- | --    |
| <i>Sporopipes frontalis</i>              | Unknown     | Cooperation | Africa      | [807]           | --                     | --         | -- | --    |
| <i>S. squamifrons</i>                    | Unknown     | Cooperation | Africa      | --              | --                     | --         | -- | --    |
| <i>Plocepasser mahali</i>                | Cooperation | Cooperation | Africa      | [807, 811, 812] | --                     | --         | -- | --    |
| <i>P. superciliosus</i>                  | Unknown     | Cooperation | Africa      | [807]           | --                     | --         | -- | --    |
| <i>P. rufoscapulatus</i>                 | Unknown     | Cooperation | Africa      | --              | --                     | --         | -- | --    |
| <i>P. donaldsoni</i>                     | Unknown     | Cooperation | Africa      | --              | --                     | --         | -- | --    |
| <i>Histurgops ruficauda</i>              | Unknown     | Cooperation | Africa      | --              | --                     | --         | -- | --    |
| <i>Pseudonigrita arnaudi</i>             | Cooperation | Cooperation | Africa      | [807, 813]      | --                     | --         | -- | --    |
| <i>P. cabanisi</i>                       | Unknown     | Cooperation | Africa      | [807]           | --                     | --         | -- | --    |
| <i>Philetairus socius</i>                | Cooperation | Cooperation | Africa      | [807, 814]      | --                     | --         | -- | --    |
| <i>Ploceus bannermani</i>                | Pair        | Pair        | Africa      | [807]           | --                     | --         | -- | --    |

|                          |             |             |        |                 |    |    |    |    |
|--------------------------|-------------|-------------|--------|-----------------|----|----|----|----|
| <i>P. batesi</i>         | Unknown     | Pair        | Africa | --              | -- | -- | -- | -- |
| <i>P. nigrimentum</i>    | Unknown     | Pair        | Africa | --              | -- | -- | -- | -- |
| <i>P. baglafecht</i>     | Pair        | Pair        | Africa | --              | -- | -- | -- | -- |
| <i>P. bertrandi</i>      | Pair        | Pair        | Africa | --              | -- | -- | -- | -- |
| <i>P. pelzelni</i>       | Pair        | Pair        | Africa | --              | -- | -- | -- | -- |
| <i>P. subpersonatus</i>  | Unknown     | Pair        | Africa | --              | -- | -- | -- | -- |
| <i>P. luteolus</i>       | Pair        | Pair        | Africa | --              | -- | -- | -- | -- |
| <i>P. intermedius</i>    | Pair        | Pair        | Africa | --              | -- | -- | -- | -- |
| <i>P. ocularis</i>       | Pair        | Pair        | Africa | --              | -- | -- | -- | -- |
| <i>P. nigricollis</i>    | Pair        | Pair        | Africa | --              | -- | -- | -- | -- |
| <i>P. melanogaster</i>   | Pair        | Pair        | Africa | --              | -- | -- | -- | -- |
| <i>P. alienus</i>        | Pair        | Pair        | Africa | --              | -- | -- | -- | -- |
| <i>P. temporalis</i>     | Unknown     | Pair        | Africa | --              | -- | -- | -- | -- |
| <i>P. capensis</i>       | Pair        | Pair        | Africa | --              | -- | -- | -- | -- |
| <i>P. subaureus</i>      | Unknown     | Pair        | Africa | --              | -- | -- | -- | -- |
| <i>P. xanthops</i>       | Pair        | Pair        | Africa | --              | -- | -- | -- | -- |
| <i>P. princeps</i>       | Pair        | Pair        | Africa | --              | -- | -- | -- | -- |
| <i>P. aurantius</i>      | Unknown     | Female only | Africa | --              | -- | -- | -- | -- |
| <i>P. bojeri</i>         | Unknown     | Female only | Africa | --              | -- | -- | -- | -- |
| <i>P. castaneiceps</i>   | Unknown     | Female only | Africa | --              | -- | -- | -- | -- |
| <i>P. xanthopterus</i>   | Female only | Female only | Africa | --              | -- | -- | -- | -- |
| <i>P. castanops</i>      | Pair        | Pair        | Africa | --              | -- | -- | -- | -- |
| <i>P. burnieri</i>       | Unknown     | Female only | Africa | --              | -- | -- | -- | -- |
| <i>P. galbula</i>        | Unknown     | Female only | Africa | --              | -- | -- | -- | -- |
| <i>P. heuglini</i>       | Female only | Female only | Africa | --              | -- | -- | -- | -- |
| <i>P. taeniopterus</i>   | Female only | Female only | Africa | --              | -- | -- | -- | -- |
| <i>P. vitellinus</i>     | Female only | Female only | Africa | --              | -- | -- | -- | -- |
| <i>P. velatus</i>        | Female only | Female only | Africa | --              | -- | -- | -- | -- |
| <i>P. katangae</i>       | Unknown     | Female only | Africa | --              | -- | -- | -- | -- |
| <i>P. ruweti</i>         | Unknown     | Female only | Africa | --              | -- | -- | -- | -- |
| <i>P. reichardi</i>      | Unknown     | Female only | Africa | --              | -- | -- | -- | -- |
| <i>P. cucullatus</i>     | Female only | Female only | Africa | [807, 815, 816] | -- | -- | -- | -- |
| <i>P. grandis</i>        | Unknown     | Pair        | Africa | [807]           | -- | -- | -- | -- |
| <i>P. spekei</i>         | Pair        | Pair        | Africa | --              | -- | -- | -- | -- |
| <i>P. spekeoides</i>     | Unknown     | Pair        | Africa | --              | -- | -- | -- | -- |
| <i>P. nigerrimus</i>     | Female only | Female only | Africa | [807, 815]      | -- | -- | -- | -- |
| <i>P. weynsi</i>         | Unknown     | Female only | Africa | [807]           | -- | -- | -- | -- |
| <i>P. golandi</i>        | Unknown     | Female only | Africa | --              | -- | -- | -- | -- |
| <i>P. melanocephalus</i> | Pair        | Pair        | Africa | --              | -- | -- | -- | -- |
| <i>P. dicrocephalus</i>  | Unknown     | Female only | Africa | --              | -- | -- | -- | -- |
| <i>P. jacksoni</i>       | Unknown     | Female only | Africa | --              | -- | -- | -- | -- |
| <i>P. badius</i>         | Unknown     | Pair        | Africa | --              | -- | -- | -- | -- |
| <i>P. rubiginosus</i>    | Female only | Female only | Africa | --              | -- | -- | -- | -- |

|                                   |             |             |             |                 |    |    |    |    |
|-----------------------------------|-------------|-------------|-------------|-----------------|----|----|----|----|
| <i>P. aureonucha</i>              | Unknown     | Pair        | Africa      | --              | -- | -- | -- | -- |
| <i>P. tricolor</i>                | Pair        | Pair        | Africa      | --              | -- | -- | -- | -- |
| <i>P. albinucha</i>               | Unknown     | Pair        | Africa      | --              | -- | -- | -- | -- |
| <i>P. nelicourvi</i>              | Pair        | Pair        | Africa      | [525]           | -- | -- | -- | -- |
| <i>P. sakalava</i>                | Pair        | Pair        | Africa      | --              | -- | -- | -- | -- |
| <i>P. benghalensis</i>            | Pair        | Pair        | Indomalayan | [658, 817]      | -- | -- | -- | -- |
| <i>P. manyar</i>                  | Pair        | Pair        | Indomalayan | [818]           | -- | -- | -- | -- |
| <i>P. philippinus</i>             | Female only | Female only | Indomalayan | [658, 817]      | -- | -- | -- | -- |
| <i>P. hypoxanthus</i>             | Female only | Female only | Indomalayan | [819]           | -- | -- | -- | -- |
| <i>P. megarhynchus</i>            | Pair        | Pair        | Indomalayan | [807]           | -- | -- | -- | -- |
| <i>P. bicolor</i>                 | Pair        | Pair        | Africa      | --              | -- | -- | -- | -- |
| <i>P. preussi</i>                 | Pair        | Pair        | Africa      | --              | -- | -- | -- | -- |
| <i>P. dorsomaculatus</i>          | Unknown     | Pair        | Africa      | --              | -- | -- | -- | -- |
| <i>P. nicolli</i>                 | Unknown     | Pair        | Africa      | --              | -- | -- | -- | -- |
| <i>P. olivaceiceps</i>            | Pair        | Pair        | Africa      | --              | -- | -- | -- | -- |
| <i>P. insignis</i>                | Pair        | Pair        | Africa      | --              | -- | -- | -- | -- |
| <i>P. angolensis</i>              | Unknown     | Pair        | Africa      | --              | -- | -- | -- | -- |
| <i>P. sanctithomae</i>            | Pair        | Pair        | Africa      | --              | -- | -- | -- | -- |
| <i>Pachyphantès superciliosus</i> | Unknown     | Pair        | Africa      | --              | -- | -- | -- | -- |
| <i>Malimbus flavipes</i>          | Unknown     | Pair        | Africa      | [807, 820]      | -- | -- | -- | -- |
| <i>M. coronatus</i>               | Suspected   | Cooperation | Africa      | [807, 821]      | -- | -- | -- | -- |
| <i>M. cassini</i>                 | Suspected   | Cooperation | Africa      | --              | -- | -- | -- | -- |
| <i>M. ballmanni</i>               | Cooperation | Cooperation | Africa      | [807, 822]      | -- | -- | -- | -- |
| <i>M. racheliae</i>               | Suspected   | Cooperation | Africa      | [807, 821]      | -- | -- | -- | -- |
| <i>M. scutatus</i>                | Suspected   | Cooperation | Africa      | [807]           | -- | -- | -- | -- |
| <i>M. ibadanensis</i>             | Pair        | Pair        | Africa      | [807, 823]      | -- | -- | -- | -- |
| <i>M. erythrogaster</i>           | Suspected   | Cooperation | Africa      | [807]           | -- | -- | -- | -- |
| <i>M. nitens</i>                  | Pair        | Pair        | Africa      | [807, 821, 824] | -- | -- | -- | -- |
| <i>M. malimbicus</i>              | Pair        | Pair        | Africa      | [807, 821]      | -- | -- | -- | -- |
| <i>M. rubricollis</i>             | Unknown     | Pair        | Africa      | [807]           | -- | -- | -- | -- |
| <i>Anaplectes rubriceps</i>       | Pair        | Pair        | Africa      | [807, 816]      | -- | -- | -- | -- |
| <i>Brachycope anomala</i>         | Unknown     | Pair        | Africa      | --              | -- | -- | -- | -- |
| <i>Quelea cardinalis</i>          | Female only | Female only | Africa      | --              | -- | -- | -- | -- |
| <i>Q. erythrops</i>               | Female only | Female only | Africa      | --              | -- | -- | -- | -- |
| <i>Q. quelea</i>                  | Pair        | Pair        | Africa      | --              | -- | -- | -- | -- |
| <i>Foudia madagascariensis</i>    | Pair        | Pair        | Africa      | [525]           | -- | -- | -- | -- |
| <i>F. eminentissima</i>           | Pair        | Pair        | Africa      | [539]           | -- | -- | -- | -- |
| <i>F. omissa</i>                  | Unknown     | Pair        | Africa      | [525]           | -- | -- | -- | -- |
| <i>F. rubra</i>                   | Occasional  | Pair        | Africa      | [825]           | -- | -- | -- | -- |
| <i>F. sechellarum</i>             | Occasional  | Pair        | Africa      | [539, 826]      | -- | -- | -- | -- |
| <i>F. flavicans</i>               | Unknown     | Pair        | Africa      | [827]           | -- | -- | -- | -- |
| <i>Euplectes afer</i>             | Female only | Female only | Africa      | [807]           | -- | -- | -- | -- |
| <i>E. diadematus</i>              | Unknown     | Female only | Africa      | --              | -- | -- | -- | -- |



|                              |             |             |        |            |    |    |    |    |
|------------------------------|-------------|-------------|--------|------------|----|----|----|----|
| <i>E. gjerowii</i>           | Female only | Female only | Africa | --         | -- | -- | -- | -- |
| <i>E. hordeaceus</i>         | Female only | Female only | Africa | --         | -- | -- | -- | -- |
| <i>E. franciscanus</i>       | Female only | Female only | Africa | --         | -- | -- | -- | -- |
| <i>E. orix</i>               | Female only | Female only | Africa | --         | -- | -- | -- | -- |
| <i>E. nigroventris</i>       | Female only | Female only | Africa | --         | -- | -- | -- | -- |
| <i>E. aureus</i>             | Female only | Female only | Africa | --         | -- | -- | -- | -- |
| <i>E. capensis</i>           | Female only | Female only | Africa | --         | -- | -- | -- | -- |
| <i>E. axillaris</i>          | Female only | Female only | Africa | --         | -- | -- | -- | -- |
| <i>E. macrourus</i>          | Female only | Female only | Africa | [828]      | -- | -- | -- | -- |
| <i>E. albonotatus</i>        | Female only | Female only | Africa | [807]      | -- | -- | -- | -- |
| <i>E. ardens</i>             | Female only | Female only | Africa | --         | -- | -- | -- | -- |
| <i>E. hartlaubi</i>          | Female only | Female only | Africa | --         | -- | -- | -- | -- |
| <i>E. psammocromius</i>      | Unknown     | Female only | Africa | --         | -- | -- | -- | -- |
| <i>E. progne</i>             | Female only | Female only | Africa | [807, 829] | -- | -- | -- | -- |
| <i>E. jacksoni</i>           | Female only | Female only | Africa | [830-832]  | -- | -- | -- | -- |
| <i>Amblyospiza albifrons</i> | Female only | Female only | Africa | [807, 816] | -- | -- | -- | -- |

**Passeroidea: Ploceidae: Estrildinae**

|                                |            |      |        |       |             |       |    |       |
|--------------------------------|------------|------|--------|-------|-------------|-------|----|-------|
| <i>Parmoptila rubrifrons</i>   | Pair       | Pair | Africa | [807] | bbdbbbbbbba | [804] | b  | [808] |
| <i>P. woodhousei</i>           | Pair       | Pair | Africa | --    | --          | --    | -- | --    |
| <i>Nigrita fusconota</i>       | Unknown    | Pair | Africa | --    | --          | --    | -- | --    |
| <i>N. bicolor</i>              | Unknown    | Pair | Africa | --    | --          | --    | -- | --    |
| <i>N. luteifrons</i>           | Pair       | Pair | Africa | --    | --          | --    | -- | --    |
| <i>N. canicapilla</i>          | Occasional | Pair | Africa | --    | --          | --    | -- | --    |
| <i>Nesocharis shelleyi</i>     | Unknown    | Pair | Africa | --    | --          | --    | -- | --    |
| <i>N. ansorgei</i>             | Pair       | Pair | Africa | --    | --          | --    | -- | --    |
| <i>N. capistrata</i>           | Unknown    | Pair | Africa | --    | --          | --    | -- | --    |
| <i>Pytilia phoenicoptera</i>   | Pair       | Pair | Africa | --    | --          | --    | -- | --    |
| <i>P. lineata</i>              | Unknown    | Pair | Africa | --    | --          | --    | -- | --    |
| <i>P. afra</i>                 | Pair       | Pair | Africa | --    | --          | --    | -- | --    |
| <i>P. melba</i>                | Pair       | Pair | Africa | --    | --          | --    | -- | --    |
| <i>P. hypogrammica</i>         | Pair       | Pair | Africa | --    | --          | --    | -- | --    |
| <i>Mandingoa nitidula</i>      | Pair       | Pair | Africa | --    | --          | --    | -- | --    |
| <i>Cryptospiza reichenovii</i> | Pair       | Pair | Africa | --    | --          | --    | -- | --    |
| <i>C. salvadorii</i>           | Unknown    | Pair | Africa | --    | --          | --    | -- | --    |
| <i>C. jacksoni</i>             | Unknown    | Pair | Africa | --    | --          | --    | -- | --    |
| <i>C. shelleyi</i>             | Unknown    | Pair | Africa | --    | --          | --    | -- | --    |
| <i>Pyrenestes sanguineus</i>   | Pair       | Pair | Africa | --    | --          | --    | -- | --    |
| <i>P. ostrinus</i>             | Pair       | Pair | Africa | --    | --          | --    | -- | --    |
| <i>P. minor</i>                | Pair       | Pair | Africa | --    | --          | --    | -- | --    |
| <i>Spermophaga poliogenys</i>  | Unknown    | Pair | Africa | --    | --          | --    | -- | --    |
| <i>S. haematina</i>            | Pair       | Pair | Africa | --    | --          | --    | -- | --    |
| <i>S. ruficapilla</i>          | Pair       | Pair | Africa | --    | --          | --    | -- | --    |
| <i>Clytospiza monteiri</i>     | Pair       | Pair | Africa | --    | --          | --    | -- | --    |

|                                 |         |        |             |            |    |    |    |    |
|---------------------------------|---------|--------|-------------|------------|----|----|----|----|
| <i>Hypargos niveoguttatus</i>   | Pair    | Pair   | Africa      | --         | -- | -- | -- | -- |
| <i>H. margaritatus</i>          | Unknown | Pair   | Africa      | --         | -- | -- | -- | -- |
| <i>Euschistospiza dybowskii</i> | Pair    | Pair   | Africa      | --         | -- | -- | -- | -- |
| <i>E. cinereovinacea</i>        | Pair    | Pair   | Africa      | --         | -- | -- | -- | -- |
| <i>Lagonosticta rufopicta</i>   | Pair    | Pair   | Africa      | --         | -- | -- | -- | -- |
| <i>L. nitidula</i>              | Pair    | Pair   | Africa      | --         | -- | -- | -- | -- |
| <i>L. senegala</i>              | Pair    | Pair   | Africa      | --         | -- | -- | -- | -- |
| <i>L. rara</i>                  | Pair    | Pair   | Africa      | --         | -- | -- | -- | -- |
| <i>L. rubricata</i>             | Pair    | Pair   | Africa      | --         | -- | -- | -- | -- |
| <i>L. landanae</i>              | Subspp  | Subspp | Africa      | --         | -- | -- | -- | -- |
| <i>L. virata</i>                | Pair    | Pair   | Africa      | --         | -- | -- | -- | -- |
| <i>L. umbrinodorsalis</i>       | Unknown | Pair   | Africa      | --         | -- | -- | -- | -- |
| <i>L. rhodopareia</i>           | Pair    | Pair   | Africa      | --         | -- | -- | -- | -- |
| <i>L. vinacea</i>               | Subspp  | Subspp | Africa      | --         | -- | -- | -- | -- |
| <i>L. larvata</i>               | Unknown | Pair   | Africa      | --         | -- | -- | -- | -- |
| <i>Uraeginthus angolensis</i>   | Pair    | Pair   | Africa      | --         | -- | -- | -- | -- |
| <i>U. bengalus</i>              | Pair    | Pair   | Africa      | --         | -- | -- | -- | -- |
| <i>U. cyanocephalus</i>         | Pair    | Pair   | Africa      | --         | -- | -- | -- | -- |
| <i>U. ianthinogaster</i>        | Pair    | Pair   | Africa      | --         | -- | -- | -- | -- |
| <i>U. granatina</i>             | Pair    | Pair   | Africa      | --         | -- | -- | -- | -- |
| <i>Estrilda caerulescens</i>    | Pair    | Pair   | Africa      | --         | -- | -- | -- | -- |
| <i>E. perreini</i>              | Pair    | Pair   | Africa      | --         | -- | -- | -- | -- |
| <i>E. thomensis</i>             | Pair    | Pair   | Africa      | --         | -- | -- | -- | -- |
| <i>E. quartinia</i>             | Pair    | Pair   | Africa      | --         | -- | -- | -- | -- |
| <i>E. melanotis</i>             | Pair    | Pair   | Africa      | --         | -- | -- | -- | -- |
| <i>E. poliopareia</i>           | Unknown | Pair   | Africa      | --         | -- | -- | -- | -- |
| <i>E. paludicola</i>            | Unknown | Pair   | Africa      | --         | -- | -- | -- | -- |
| <i>E. ochrogaster</i>           | Subspp  | Subspp | Africa      | --         | -- | -- | -- | -- |
| <i>E. melpoda</i>               | Pair    | Pair   | Africa      | --         | -- | -- | -- | -- |
| <i>E. rhodopyga</i>             | Pair    | Pair   | Africa      | --         | -- | -- | -- | -- |
| <i>E. rufibarba</i>             | Unknown | Pair   | Africa      | [833]      | -- | -- | -- | -- |
| <i>E. troglodytes</i>           | Pair    | Pair   | Africa      | [807]      | -- | -- | -- | -- |
| <i>E. astrild</i>               | Pair    | Pair   | Africa      | [807, 818] | -- | -- | -- | -- |
| <i>E. nigriloris</i>            | Unknown | Pair   | Africa      | [807]      | -- | -- | -- | -- |
| <i>E. nonnula</i>               | Pair    | Pair   | Africa      | --         | -- | -- | -- | -- |
| <i>E. atricapilla</i>           | Unknown | Pair   | Africa      | --         | -- | -- | -- | -- |
| <i>E. kandti</i>                | Unknown | Pair   | Africa      | --         | -- | -- | -- | -- |
| <i>E. erythronotos</i>          | Pair    | Pair   | Africa      | --         | -- | -- | -- | -- |
| <i>E. charmosyna</i>            | Unknown | Pair   | Africa      | --         | -- | -- | -- | -- |
| <i>Amandava amandava</i>        | Pair    | Pair   | Indomalayan | [807, 818] | -- | -- | -- | -- |
| <i>A. formosa</i>               | Pair    | Pair   | Indomalayan | [833]      | -- | -- | -- | -- |
| <i>A. subflava</i>              | Pair    | Pair   | Africa      | [807]      | -- | -- | -- | -- |
| <i>Ortygospiza atricollis</i>   | Pair    | Pair   | Africa      | --         | -- | -- | -- | -- |

|                                 |         |        |             |       |    |    |    |    |
|---------------------------------|---------|--------|-------------|-------|----|----|----|----|
| <i>O. gabonensis</i>            | Pair    | Pair   | Africa      | --    | -- | -- | -- | -- |
| <i>O. locustella</i>            | Pair    | Pair   | Africa      | --    | -- | -- | -- | -- |
| <i>Emblema pictum</i>           | Pair    | Pair   | Australia   | [510] | -- | -- | -- | -- |
| <i>Stagonopleura bella</i>      | Pair    | Pair   | Australia   | --    | -- | -- | -- | -- |
| <i>S. oculata</i>               | Pair    | Pair   | Australia   | --    | -- | -- | -- | -- |
| <i>S. guttata</i>               | Pair    | Pair   | Australia   | --    | -- | -- | -- | -- |
| <i>Oreostruthus fuliginosus</i> | Unknown | Pair   | Australia   | [434] | -- | -- | -- | -- |
| <i>Neochmia temporalis</i>      | Pair    | Pair   | Australia   | [510] | -- | -- | -- | -- |
| <i>N. phaeton</i>               | Pair    | Pair   | Australia   | --    | -- | -- | -- | -- |
| <i>N. ruficauda</i>             | Pair    | Pair   | Australia   | --    | -- | -- | -- | -- |
| <i>N. modesta</i>               | Pair    | Pair   | Australia   | --    | -- | -- | -- | -- |
| <i>Taeniopygia guttata</i>      | Pair    | Pair   | Australia   | --    | -- | -- | -- | -- |
| <i>T. bichenovii</i>            | Pair    | Pair   | Australia   | --    | -- | -- | -- | -- |
| <i>Poephila personata</i>       | Pair    | Pair   | Australia   | --    | -- | -- | -- | -- |
| <i>P. acuticauda</i>            | Pair    | Pair   | Australia   | --    | -- | -- | -- | -- |
| <i>P. cincta</i>                | Pair    | Pair   | Australia   | --    | -- | -- | -- | -- |
| <i>Erythrura hyperythra</i>     | Unknown | Pair   | Indomalayan | [468] | -- | -- | -- | -- |
| <i>E. prasina</i>               | Unknown | Pair   | Indomalayan | [833] | -- | -- | -- | -- |
| <i>E. viridifacies</i>          | Unknown | Pair   | Indomalayan | [455] | -- | -- | -- | -- |
| <i>E. tricolor</i>              | Unknown | Pair   | Australia   | [833] | -- | -- | -- | -- |
| <i>E. trichroa</i>              | Pair    | Pair   | Australia   | [510] | -- | -- | -- | -- |
| <i>E. coloria</i>               | Unknown | Pair   | Indomalayan | [468] | -- | -- | -- | -- |
| <i>E. papuana</i>               | Unknown | Pair   | Australia   | [434] | -- | -- | -- | -- |
| <i>E. psittacea</i>             | Pair    | Pair   | Australia   | [833] | -- | -- | -- | -- |
| <i>E. pealii</i>                | Pair    | Pair   | Australia   | [450] | -- | -- | -- | -- |
| <i>E. cyaneovirens</i>          | Pair    | Pair   | Australia   | [833] | -- | -- | -- | -- |
| <i>E. regia</i>                 | Pair    | Pair   | Australia   | --    | -- | -- | -- | -- |
| <i>E. kleinschmidti</i>         | Unknown | Pair   | Australia   | [450] | -- | -- | -- | -- |
| <i>Chloebia gouldiae</i>        | Pair    | Pair   | Australia   | [510] | -- | -- | -- | -- |
| <i>Lemuresthes nana</i>         | Pair    | Pair   | Africa      | [525] | -- | -- | -- | -- |
| <i>Lonchura cantans</i>         | Pair    | Pair   | Africa      | [807] | -- | -- | -- | -- |
| <i>L. malabarica</i>            | Pair    | Pair   | Indomalayan | [833] | -- | -- | -- | -- |
| <i>L. griseicapilla</i>         | Pair    | Pair   | Africa      | [807] | -- | -- | -- | -- |
| <i>L. cucullata</i>             | Pair    | Pair   | Africa      | --    | -- | -- | -- | -- |
| <i>L. bicolor</i>               | Pair    | Pair   | Africa      | --    | -- | -- | -- | -- |
| <i>L. nigriceps</i>             | Subspp  | Subspp | Africa      | [833] | -- | -- | -- | -- |
| <i>L. fringilloides</i>         | Pair    | Pair   | Africa      | [807] | -- | -- | -- | -- |
| <i>L. striata</i>               | Pair    | Pair   | Indomalayan | [833] | -- | -- | -- | -- |
| <i>L. leucogastroides</i>       | Unknown | Pair   | Indomalayan | --    | -- | -- | -- | -- |
| <i>L. fuscans</i>               | Unknown | Pair   | Indomalayan | --    | -- | -- | -- | -- |
| <i>L. molucca</i>               | Pair    | Pair   | Australia   | --    | -- | -- | -- | -- |
| <i>L. kelaarti</i>              | Pair    | Pair   | Indomalayan | --    | -- | -- | -- | -- |
| <i>L. punctulata</i>            | Pair    | Pair   | Indomalayan | [510] | -- | -- | -- | -- |

|                               |         |        |             |       |    |    |    |    |
|-------------------------------|---------|--------|-------------|-------|----|----|----|----|
| <i>L. leucogastra</i>         | Unknown | Pair   | Indomalayan | [833] | -- | -- | -- | -- |
| <i>L. tristissima</i>         | Unknown | Pair   | Australia   | [434] | -- | -- | -- | -- |
| <i>L. leucosticta</i>         | Unknown | Pair   | Australia   | [833] | -- | -- | -- | -- |
| <i>L. malacca</i>             | Pair    | Pair   | Indomalayan | --    | -- | -- | -- | -- |
| <i>L. ferruginosa</i>         | Unknown | Pair   | Indomalayan | --    | -- | -- | -- | -- |
| <i>L. quinticolor</i>         | Unknown | Pair   | Australia   | --    | -- | -- | -- | -- |
| <i>L. maja</i>                | Unknown | Pair   | Indomalayan | --    | -- | -- | -- | -- |
| <i>L. pallida</i>             | Unknown | Pair   | Australia   | --    | -- | -- | -- | -- |
| <i>L. grandis</i>             | Unknown | Pair   | Australia   | [434] | -- | -- | -- | -- |
| <i>L. vana</i>                | Unknown | Pair   | Australia   | [833] | -- | -- | -- | -- |
| <i>L. caniceps</i>            | Pair    | Pair   | Australia   | [434] | -- | -- | -- | -- |
| <i>L. nevermanni</i>          | Unknown | Pair   | Australia   | --    | -- | -- | -- | -- |
| <i>L. spectabilis</i>         | Pair    | Pair   | Australia   | --    | -- | -- | -- | -- |
| <i>L. hunsteini</i>           | Unknown | Pair   | Australia   | --    | -- | -- | -- | -- |
| <i>L. forbesi</i>             | Unknown | Pair   | Australia   | --    | -- | -- | -- | -- |
| <i>L. nigerrima</i>           | Subspp  | Subspp | Australia   | [833] | -- | -- | -- | -- |
| <i>L. flaviprymna</i>         | Pair    | Pair   | Australia   | [510] | -- | -- | -- | -- |
| <i>L. castaneothorax</i>      | Pair    | Pair   | Australia   | [434] | -- | -- | -- | -- |
| <i>L. stygia</i>              | Pair    | Pair   | Australia   | --    | -- | -- | -- | -- |
| <i>L. teerinki</i>            | Unknown | Pair   | Australia   | [833] | -- | -- | -- | -- |
| <i>L. montana</i>             | Unknown | Pair   | Australia   | [434] | -- | -- | -- | -- |
| <i>L. monticola</i>           | Unknown | Pair   | Australia   | --    | -- | -- | -- | -- |
| <i>L. melaena</i>             | Unknown | Pair   | Australia   | --    | -- | -- | -- | -- |
| <i>Heteromunia pectoralis</i> | Pair    | Pair   | Australia   | [510] | -- | -- | -- | -- |
| <i>Padda oryzivora</i>        | Pair    | Pair   | Indomalayan | [833] | -- | -- | -- | -- |
| <i>P. fuscata</i>             | Unknown | Pair   | Indomalayan | --    | -- | -- | -- | -- |
| <i>Amadina fasciata</i>       | Pair    | Pair   | Africa      | [807] | -- | -- | -- | -- |
| <i>A. erythrocephala</i>      | Pair    | Pair   | Africa      | --    | -- | -- | -- | -- |

**Passeroidea: Ploceidae: Viduinae**

|                              |                |                |        |            |           |       |    |       |
|------------------------------|----------------|----------------|--------|------------|-----------|-------|----|-------|
| <i>Anomalospiza imberbis</i> | Brood parasite | Brood parasite | Africa | [807, 808] | bbdbbbbbb | [804] | c  | [808] |
| <i>Vidua chalybeata</i>      | Brood parasite | Brood parasite | Africa | [807]      | --        | --    | -- | --    |
| <i>V. rariicola</i>          | Brood parasite | Brood parasite | Africa | --         | --        | --    | -- | --    |
| <i>V. larvaticola</i>        | Brood parasite | Brood parasite | Africa | --         | --        | --    | -- | --    |
| <i>V. funerea</i>            | Brood parasite | Brood parasite | Africa | --         | --        | --    | -- | --    |
| <i>V. codringtoni</i>        | Brood parasite | Brood parasite | Africa | --         | --        | --    | -- | --    |
| <i>V. purpurascens</i>       | Brood parasite | Brood parasite | Africa | --         | --        | --    | -- | --    |
| <i>V. wilsoni</i>            | Brood parasite | Brood parasite | Africa | --         | --        | --    | -- | --    |
| <i>V. hypocherina</i>        | Brood parasite | Brood parasite | Africa | --         | --        | --    | -- | --    |
| <i>V. fischeri</i>           | Brood parasite | Brood parasite | Africa | --         | --        | --    | -- | --    |
| <i>V. regia</i>              | Brood parasite | Brood parasite | Africa | --         | --        | --    | -- | --    |
| <i>V. macroura</i>           | Brood parasite | Brood parasite | Africa | --         | --        | --    | -- | --    |
| <i>V. orientalis</i>         | Brood parasite | Brood parasite | Africa | --         | --        | --    | -- | --    |
| <i>V. togoensis</i>          | Brood parasite | Brood parasite | Africa | --         | --        | --    | -- | --    |

|                      |                |                |        |    |    |    |    |    |
|----------------------|----------------|----------------|--------|----|----|----|----|----|
| <i>V. interjecta</i> | Brood parasite | Brood parasite | Africa | -- | -- | -- | -- | -- |
| <i>V. paradisaea</i> | Brood parasite | Brood parasite | Africa | -- | -- | -- | -- | -- |
| <i>V. obtusa</i>     | Brood parasite | Brood parasite | Africa | -- | -- | -- | -- | -- |

**Passeroidea: Passeridae**

|                                 |             |             |             |            |              |       |
|---------------------------------|-------------|-------------|-------------|------------|--------------|-------|
| <i>Passer ammodendri</i>        | Pair        | Pair        | Palaearctic | [834]      | bbdbbbbbbbaa | [804] |
| <i>P. domesticus</i>            | Cooperation | Cooperation | Holarctic   | [835]      | --           | --    |
| <i>P. hispaniolensis</i>        | Pair        | Pair        | Palaearctic | [807, 834] | --           | --    |
| <i>P. pyrrhonotus</i>           | Pair        | Pair        | Indomalayan | [834]      | --           | --    |
| <i>P. castanopterus</i>         | Pair        | Pair        | Africa      | [807, 834] | --           | --    |
| <i>P. rutilans</i>              | Pair        | Pair        | Indomalayan | [658]      | --           | --    |
| <i>P. flaveolus</i>             | Pair        | Pair        | Indomalayan | [834]      | --           | --    |
| <i>P. moabiticus</i>            | Pair        | Pair        | Palaearctic | [818]      | --           | --    |
| <i>P. iagoensis</i>             | Pair        | Pair        | Africa      | --         | --           | --    |
| <i>P. rufocinctus</i>           | Unknown     | Pair        | Africa      | [807]      | --           | --    |
| <i>P. insularis</i>             | Pair        | Pair        | Africa      | --         | --           | --    |
| <i>P. motitensis</i>            | Unknown     | Pair        | Africa      | [807, 816] | --           | --    |
| <i>P. melanurus</i>             | Pair        | Pair        | Africa      | --         | --           | --    |
| <i>P. griseus</i>               | Pair        | Pair        | Africa      | [807, 834] | --           | --    |
| <i>P. swainsonii</i>            | Unknown     | Pair        | Africa      | --         | --           | --    |
| <i>P. gongonensis</i>           | Unknown     | Pair        | Africa      | --         | --           | --    |
| <i>P. suahelicus</i>            | Unknown     | Pair        | Africa      | --         | --           | --    |
| <i>P. diffusus</i>              | Pair        | Pair        | Africa      | [807, 816] | --           | --    |
| <i>P. simplex</i>               | Pair        | Pair        | Africa      | [818]      | --           | --    |
| <i>P. montanus</i>              | Pair        | Pair        | Palaearctic | --         | --           | --    |
| <i>P. luteus</i>                | Cooperation | Cooperation | Africa      | [834, 836] | --           | --    |
| <i>P. euchlorus</i>             | Pair        | Pair        | Palaearctic | [807, 834] | --           | --    |
| <i>P. eminibey</i>              | Pair        | Pair        | Africa      | --         | --           | --    |
| <i>Petronia pyrgita</i>         | Pair        | Pair        | Africa      | [807]      | --           | --    |
| <i>P. xanthocollis</i>          | Pair        | Pair        | Indomalayan | [837]      | --           | --    |
| <i>P. superciliaris</i>         | Unknown     | Pair        | Africa      | [807]      | --           | --    |
| <i>P. dentata</i>               | Pair        | Pair        | Africa      | --         | --           | --    |
| <i>P. petronia</i>              | Pair        | Pair        | Palaearctic | [818]      | --           | --    |
| <i>Carpospiza brachydactyla</i> | Pair        | Pair        | Palaearctic | --         | --           | --    |
| <i>Montifringilla nivalis</i>   | Pair        | Pair        | Palaearctic | --         | --           | --    |
| <i>M. adamsi</i>                | Pair        | Pair        | Palaearctic | [837]      | --           | --    |
| <i>M. taczanowskii</i>          | Unknown     | Pair        | Palaearctic | --         | --           | --    |
| <i>M. davidiana</i>             | Unknown     | Pair        | Palaearctic | --         | --           | --    |
| <i>M. ruficollis</i>            | Pair        | Pair        | Palaearctic | --         | --           | --    |
| <i>M. blanfordi</i>             | Pair        | Pair        | Palaearctic | --         | --           | --    |
| <i>M. theresae</i>              | Unknown     | Pair        | Palaearctic | [838]      | --           | --    |

**Passeroidea: Fringillidae**

|                          |         |             |             |       |              |       |
|--------------------------|---------|-------------|-------------|-------|--------------|-------|
| <i>Fringilla coelebs</i> | Pair    | Pair        | Palaearctic | [818] | bbdbbbbbbbaa | [804] |
| <i>F. teydea</i>         | Unknown | Female only | Palaearctic | --    | --           | --    |

|                          |         |        |             |            |    |    |
|--------------------------|---------|--------|-------------|------------|----|----|
| <i>F. montifringilla</i> | Pair    | Pair   | Palaearctic | [818, 839] | -- | -- |
| <i>Serinus pusillus</i>  | Pair    | Pair   | Palaearctic | [818]      | -- | -- |
| <i>S. serinus</i>        | Pair    | Pair   | Palaearctic | --         | -- | -- |
| <i>S. syriacus</i>       | Pair    | Pair   | Palaearctic | --         | -- | -- |
| <i>S. canaria</i>        | Pair    | Pair   | Palaearctic | --         | -- | -- |
| <i>S. citrinella</i>     | Pair    | Pair   | Palaearctic | --         | -- | -- |
| <i>S. thibetanus</i>     | Unknown | Pair   | Palaearctic | [837]      | -- | -- |
| <i>S. canicollis</i>     | Pair    | Pair   | Africa      | [807]      | -- | -- |
| <i>S. nigriceps</i>      | Unknown | Pair   | Africa      | --         | -- | -- |
| <i>S. citrinelloides</i> | Pair    | Pair   | Africa      | --         | -- | -- |
| <i>S. frontalis</i>      | Unknown | Pair   | Africa      | --         | -- | -- |
| <i>S. hypostictus</i>    | Unknown | Pair   | Africa      | --         | -- | -- |
| <i>S. capistratus</i>    | Unknown | Pair   | Africa      | --         | -- | -- |
| <i>S. koliensis</i>      | Unknown | Pair   | Africa      | --         | -- | -- |
| <i>S. scotops</i>        | Pair    | Pair   | Africa      | --         | -- | -- |
| <i>S. leucopygius</i>    | Pair    | Pair   | Africa      | --         | -- | -- |
| <i>S. rothschildi</i>    | Unknown | Pair   | Palaearctic | [837]      | -- | -- |
| <i>S. flavigula</i>      | Unknown | Pair   | Africa      | [807]      | -- | -- |
| <i>S. xanthopygius</i>   | Unknown | Pair   | Africa      | --         | -- | -- |
| <i>S. reichenowi</i>     | Unknown | Pair   | Africa      | --         | -- | -- |
| <i>S. atrogularis</i>    | Pair    | Pair   | Africa      | --         | -- | -- |
| <i>S. citrinipectus</i>  | Pair    | Pair   | Africa      | --         | -- | -- |
| <i>S. mozambicus</i>     | Pair    | Pair   | Africa      | --         | -- | -- |
| <i>S. donaldsoni</i>     | Unknown | Pair   | Africa      | --         | -- | -- |
| <i>S. buchani</i>        | Unknown | Pair   | Africa      | --         | -- | -- |
| <i>S. dorsostriatus</i>  | Pair    | Pair   | Africa      | --         | -- | -- |
| <i>S. flaviventris</i>   | Pair    | Pair   | Africa      | --         | -- | -- |
| <i>S. sulphuratus</i>    | Pair    | Pair   | Africa      | --         | -- | -- |
| <i>S. albogularis</i>    | Pair    | Pair   | Africa      | --         | -- | -- |
| <i>S. canicapillus</i>   | Subspp  | Subspp | Africa      | --         | -- | -- |
| <i>S. reichardi</i>      | Unknown | Pair   | Africa      | --         | -- | -- |
| <i>S. gularis</i>        | Pair    | Pair   | Africa      | --         | -- | -- |
| <i>S. mennelli</i>       | Pair    | Pair   | Africa      | --         | -- | -- |
| <i>S. tristriatus</i>    | Pair    | Pair   | Africa      | --         | -- | -- |
| <i>S. menachensis</i>    | Pair    | Pair   | Palaearctic | [837]      | -- | -- |
| <i>S. ankoberensis</i>   | Unknown | Pair   | Africa      | [807]      | -- | -- |
| <i>S. striolatus</i>     | Pair    | Pair   | Africa      | --         | -- | -- |
| <i>S. whytii</i>         | Unknown | Pair   | Africa      | --         | -- | -- |
| <i>S. burtoni</i>        | Pair    | Pair   | Africa      | --         | -- | -- |
| <i>S. rufobrunneus</i>   | Unknown | Pair   | Africa      | --         | -- | -- |
| <i>S. melanochrous</i>   | Unknown | Pair   | Africa      | --         | -- | -- |
| <i>S. leucopterus</i>    | Pair    | Pair   | Africa      | --         | -- | -- |
| <i>S. totta</i>          | Pair    | Pair   | Africa      | --         | -- | -- |

|                                   |            |      |             |            |    |    |
|-----------------------------------|------------|------|-------------|------------|----|----|
| <i>S. symonsi</i>                 | Unknown    | Pair | Africa      | --         | -- | -- |
| <i>S. leucolaema</i>              | Unknown    | Pair | Africa      | --         | -- | -- |
| <i>S. alario</i>                  | Pair       | Pair | Africa      | --         | -- | -- |
| <i>S. estherae</i>                | Unknown    | Pair | Indomalayan | [468]      | -- | -- |
| <i>Neospiza concolor</i>          | Unknown    | Pair | Africa      | [807]      | -- | -- |
| <i>Linurgus olivaceus</i>         | Pair       | Pair | Africa      | --         | -- | -- |
| <i>Rhynchostruthus socotranus</i> | Unknown    | Pair | Africa      | --         | -- | -- |
| <i>Carduelis chloris</i>          | Pair       | Pair | Palaearctic | [818]      | -- | -- |
| <i>C. sinica</i>                  | Pair       | Pair | Palaearctic | [697, 840] | -- | -- |
| <i>C. spinoides</i>               | Pair       | Pair | Palaearctic | [837]      | -- | -- |
| <i>C. ambigua</i>                 | Unknown    | Pair | Palaearctic | --         | -- | -- |
| <i>C. monguilloti</i>             | Unknown    | Pair | Indomalayan | --         | -- | -- |
| <i>C. spinus</i>                  | Pair       | Pair | Palaearctic | [818]      | -- | -- |
| <i>C. pinus</i>                   | Pair       | Pair | Palaearctic | [841]      | -- | -- |
| <i>C. atriceps</i>                | Unknown    | Pair | Neotropical | [837]      | -- | -- |
| <i>C. spinescens</i>              | Unknown    | Pair | Neotropical | [79]       | -- | -- |
| <i>C. yarrellii</i>               | Unknown    | Pair | Neotropical | [380]      | -- | -- |
| <i>C. cucullata</i>               | Pair       | Pair | Neotropical | --         | -- | -- |
| <i>C. crassirostris</i>           | Unknown    | Pair | Neotropical | [384]      | -- | -- |
| <i>C. magellanica</i>             | Unknown    | Pair | Neotropical | [79]       | -- | -- |
| <i>C. siemiradzkii</i>            | Unknown    | Pair | Neotropical | [380]      | -- | -- |
| <i>C. olivacea</i>                | Unknown    | Pair | Neotropical | [837]      | -- | -- |
| <i>C. notata</i>                  | Unknown    | Pair | Neotropical | --         | -- | -- |
| <i>C. barbata</i>                 | Unknown    | Pair | Neotropical | [384]      | -- | -- |
| <i>C. xanthogastra</i>            | Unknown    | Pair | Neotropical | [480]      | -- | -- |
| <i>C. atrata</i>                  | Unknown    | Pair | Neotropical | [384]      | -- | -- |
| <i>C. uropygialis</i>             | Unknown    | Pair | Neotropical | --         | -- | -- |
| <i>C. tristis</i>                 | Pair       | Pair | Nearctic    | [842]      | -- | -- |
| <i>C. psaltria</i>                | Pair       | Pair | Neotropical | [843]      | -- | -- |
| <i>C. lawrencei</i>               | Occasional | Pair | Nearctic    | [844]      | -- | -- |
| <i>C. dominicensis</i>            | Unknown    | Pair | Neotropical | [837]      | -- | -- |
| <i>C. carduelis</i>               | Pair       | Pair | Palaearctic | [818]      | -- | -- |
| <i>C. hornemanni</i>              | Occasional | Pair | Holarctic   | --         | -- | -- |
| <i>C. flammea</i>                 | Occasional | Pair | Holarctic   | --         | -- | -- |
| <i>C. flavirostris</i>            | Pair       | Pair | Palaearctic | --         | -- | -- |
| <i>C. cannabina</i>               | Pair       | Pair | Palaearctic | --         | -- | -- |
| <i>C. yemenensis</i>              | Pair       | Pair | Palaearctic | [837]      | -- | -- |
| <i>C. johannis</i>                | Unknown    | Pair | Africa      | [807]      | -- | -- |
| <i>Leucosticte nemoricola</i>     | Unknown    | Pair | Palaearctic | [837]      | -- | -- |
| <i>L. brandti</i>                 | Pair       | Pair | Palaearctic | --         | -- | -- |
| <i>L. arctoa</i>                  | Pair       | Pair | Palaearctic | --         | -- | -- |
| <i>L. tephrocotis</i>             | Pair       | Pair | Nearctic    | [845]      | -- | -- |
| <i>L. atrata</i>                  | Pair       | Pair | Nearctic    | [846]      | -- | -- |

|                                      |            |      |             |       |    |    |
|--------------------------------------|------------|------|-------------|-------|----|----|
| <i>L. australis</i>                  | Pair       | Pair | Nearctic    | [847] | -- | -- |
| <i>Callacanthus burtoni</i>          | Pair       | Pair | Palaearctic | [837] | -- | -- |
| <i>Rhodopechys sanguinea</i>         | Pair       | Pair | Palaearctic | [818] | -- | -- |
| <i>R. githaginea</i>                 | Pair       | Pair | Palaearctic | --    | -- | -- |
| <i>R. mongolica</i>                  | Pair       | Pair | Palaearctic | --    | -- | -- |
| <i>R. obsoleta</i>                   | Pair       | Pair | Palaearctic | --    | -- | -- |
| <i>Uragus sibiricus</i>              | Pair       | Pair | Palaearctic | [837] | -- | -- |
| <i>Carpodacus rubescens</i>          | Unknown    | Pair | Palaearctic | --    | -- | -- |
| <i>C. nipalensis</i>                 | Unknown    | Pair | Palaearctic | --    | -- | -- |
| <i>C. purpureus</i>                  | Pair       | Pair | Nearctic    | [848] | -- | -- |
| <i>C. erythrinus</i>                 | Occasional | Pair | Palaearctic | [818] | -- | -- |
| <i>C. cassinii</i>                   | Pair       | Pair | Nearctic    | [849] | -- | -- |
| <i>C. mexicanus</i>                  | Pair       | Pair | Nearctic    | [850] | -- | -- |
| <i>C. pulcherrimus</i>               | Unknown    | Pair | Palaearctic | [837] | -- | -- |
| <i>C. eos</i>                        | Unknown    | Pair | Palaearctic | --    | -- | -- |
| <i>C. rodochrous</i>                 | Pair       | Pair | Palaearctic | --    | -- | -- |
| <i>C. vinaceus</i>                   | Pair       | Pair | Palaearctic | --    | -- | -- |
| <i>C. edwardsii</i>                  | Unknown    | Pair | Palaearctic | --    | -- | -- |
| <i>C. synoicus</i>                   | Unknown    | Pair | Palaearctic | [818] | -- | -- |
| <i>C. roseus</i>                     | Unknown    | Pair | Palaearctic | [837] | -- | -- |
| <i>C. trifasciatus</i>               | Unknown    | Pair | Palaearctic | --    | -- | -- |
| <i>C. rodopeplus</i>                 | Unknown    | Pair | Palaearctic | --    | -- | -- |
| <i>C. thura</i>                      | Pair       | Pair | Palaearctic | --    | -- | -- |
| <i>C. rhodochlamys</i>               | Unknown    | Pair | Palaearctic | --    | -- | -- |
| <i>C. rubicilloides</i>              | Unknown    | Pair | Palaearctic | --    | -- | -- |
| <i>C. rubicilla</i>                  | Pair       | Pair | Palaearctic | [818] | -- | -- |
| <i>C. puniceus</i>                   | Unknown    | Pair | Palaearctic | --    | -- | -- |
| <i>C. roborowskii</i>                | Unknown    | Pair | Palaearctic | --    | -- | -- |
| <i>Pinicola enucleator</i>           | Pair       | Pair | Holarctic   | --    | -- | -- |
| <i>P. subhimachalus</i>              | Unknown    | Pair | Palaearctic | [837] | -- | -- |
| <i>Haematospiza sipahi</i>           | Unknown    | Pair | Palaearctic | --    | -- | -- |
| <i>Loxia pytyopsittacus</i>          | Pair       | Pair | Palaearctic | [818] | -- | -- |
| <i>L. scotica</i>                    | Occasional | Pair | Palaearctic | [851] | -- | -- |
| <i>L. curvirostra</i>                | Occasional | Pair | Holarctic   | [818] | -- | -- |
| <i>L. leucoptera</i>                 | Pair       | Pair | Palaearctic | --    | -- | -- |
| <i>Pyrrhula nipalensis</i>           | Unknown    | Pair | Indomalayan | [837] | -- | -- |
| <i>P. leucogenis</i>                 | Unknown    | Pair | Indomalayan | [468] | -- | -- |
| <i>P. aurantiaca</i>                 | Unknown    | Pair | Palaearctic | [837] | -- | -- |
| <i>P. erythrocephala</i>             | Unknown    | Pair | Palaearctic | --    | -- | -- |
| <i>P. erythaca</i>                   | Pair       | Pair | Palaearctic | --    | -- | -- |
| <i>P. pyrrhula</i>                   | Pair       | Pair | Palaearctic | [818] | -- | -- |
| <i>Coccothraustes coccothraustes</i> | Pair       | Pair | Palaearctic | --    | -- | -- |
| <i>Eophona migratoria</i>            | Pair       | Pair | Palaearctic | [837] | -- | -- |



|                                  |             |             |             |                |                      |       |
|----------------------------------|-------------|-------------|-------------|----------------|----------------------|-------|
| <i>E. personata</i>              | Pair        | Pair        | Palaearctic | --             | --                   | --    |
| <i>Mycerobas icteroides</i>      | Pair        | Pair        | Palaearctic | --             | --                   | --    |
| <i>M. affinis</i>                | Unknown     | Pair        | Palaearctic | --             | --                   | --    |
| <i>M. melanozanthos</i>          | Unknown     | Pair        | Palaearctic | --             | --                   | --    |
| <i>M. carnipes</i>               | Pair        | Pair        | Palaearctic | --             | --                   | --    |
| <i>Hesperiphona vespertina</i>   | Occasional  | Pair        | Nearctic    | [852]          | --                   | --    |
| <i>H. abeillei</i>               | Pair        | Pair        | Nearctic    | [837]          | --                   | --    |
| <i>Pyrrhoptectes epauletta</i>   | Unknown     | Pair        | Palaearctic | --             | --                   | --    |
| <i>Telespiza ultima</i>          | Pair        | Pair        | Neotropical | [853, 854]     | --                   | --    |
| <i>T. cantans</i>                | Pair        | Pair        | Neotropical | --             | --                   | --    |
| <i>Psittirostra psittacea</i>    | Unknown     | Pair        | Neotropical | [854, 855]     | --                   | --    |
| <i>Loxioides bailleui</i>        | Cooperation | Cooperation | Neotropical | [854, 856]     | --                   | --    |
| <i>Pseudonestor xanthophrys</i>  | Pair        | Pair        | Neotropical | [854, 857]     | --                   | --    |
| <i>Viridonia stejnegeri</i>      | Unknown     | Pair        | Neotropical | [854, 858]     | --                   | --    |
| <i>V. virens</i>                 | Occasional  | Pair        | Neotropical | [854, 858]     | --                   | --    |
| <i>V. parva</i>                  | Pair        | Pair        | Neotropical | [854, 859]     | --                   | --    |
| <i>V. sagittirostris</i>         | Unknown     | Pair        | Neotropical | [858]          | --                   | --    |
| <i>Hemignathus wilsoni</i>       | Unknown     | Pair        | Neotropical | [854, 860]     | --                   | --    |
| <i>Oreomystis bairdi</i>         | Unknown     | Pair        | Neotropical | [854, 861]     | --                   | --    |
| <i>O. mana</i>                   | Pair        | Pair        | Neotropical | [854, 862-864] | --                   | --    |
| <i>Paroreomyza montana</i>       | Cooperation | Cooperation | Neotropical | [854, 865]     | --                   | --    |
| <i>P. flammea</i>                | Unknown     | Cooperation | Neotropical | --             | --                   | --    |
| <i>P. maculata</i>               | Unknown     | Cooperation | Neotropical | --             | --                   | --    |
| <i>Loxops caeruleirostris</i>    | Unknown     | Pair        | Neotropical | [866]          | --                   | --    |
| <i>L. coccineus</i>              | Pair        | Pair        | Neotropical | [854, 867]     | --                   | --    |
| <i>Vestiaria coccinea</i>        | Pair        | Pair        | Neotropical | [854, 868]     | --                   | --    |
| <i>Palmeria dolei</i>            | Unknown     | Cooperation | Neotropical | [854, 869]     | --                   | --    |
| <i>Himatione sanguinea</i>       | Pair        | Pair        | Neotropical | [854, 870]     | --                   | --    |
| <i>Melamprosops phaeosoma</i>    | Unknown     | Pair        | Neotropical | [854, 871]     | --                   | --    |
| <b>Passeroidea: Motacillidae</b> |             |             |             |                |                      |       |
| <i>Dendronanthus indicus</i>     | Pair        | Pair        | Palaearctic | [872]          | bbbbbbbbbbbbbbbbbbba | [804] |
| <i>Motacilla alba</i>            | Pair        | Pair        | Palaearctic | [615]          | --                   | --    |
| <i>M. lugens</i>                 | Subspp      | Subspp      | Nearctic    | [873]          | --                   | --    |
| <i>M. grandis</i>                | Pair        | Pair        | Palaearctic | [872, 874]     | --                   | --    |
| <i>M. madaraspatensis</i>        | Pair        | Pair        | Indomalayan | [875]          | --                   | --    |
| <i>M. aguimp</i>                 | Pair        | Pair        | Africa      | [503]          | --                   | --    |
| <i>M. capensis</i>               | Occasional  | Pair        | Africa      | [872]          | --                   | --    |
| <i>M. flaviventris</i>           | Occasional  | Pair        | Africa      | --             | --                   | --    |
| <i>M. citreola</i>               | Pair        | Pair        | Palaearctic | [615, 872]     | --                   | --    |
| <i>M. flava</i>                  | Pair        | Pair        | Palaearctic | --             | --                   | --    |
| <i>M. cinerea</i>                | Occasional  | Pair        | Palaearctic | --             | --                   | --    |
| <i>M. clara</i>                  | Pair        | Pair        | Africa      | [872]          | --                   | --    |
| <i>Tmetothylacus tenellus</i>    | Pair        | Pair        | Africa      | --             | --                   | --    |

|                             |            |        |             |            |    |    |
|-----------------------------|------------|--------|-------------|------------|----|----|
| <i>Macronyx croceus</i>     | Pair       | Pair   | Africa      | --         | -- | -- |
| <i>M. fuellebornii</i>      | Pair       | Pair   | Africa      | --         | -- | -- |
| <i>M. capensis</i>          | Pair       | Pair   | Africa      | --         | -- | -- |
| <i>M. flavicollis</i>       | Unknown    | Pair   | Africa      | --         | -- | -- |
| <i>M. ameliae</i>           | Pair       | Pair   | Africa      | --         | -- | -- |
| <i>M. aurantigula</i>       | Pair       | Pair   | Africa      | --         | -- | -- |
| <i>M. grimwoodi</i>         | Unknown    | Pair   | Africa      | --         | -- | -- |
| <i>Hemimacronyx sharpei</i> | Pair       | Pair   | Africa      | --         | -- | -- |
| <i>H. chloris</i>           | Pair       | Pair   | Africa      | --         | -- | -- |
| <i>Anthus lineiventris</i>  | Pair       | Pair   | Africa      | --         | -- | -- |
| <i>A. crenatus</i>          | Pair       | Pair   | Africa      | --         | -- | -- |
| <i>A. cinnamomeus</i>       | Pair       | Pair   | Africa      | --         | -- | -- |
| <i>A. cameroonensis</i>     | Subspp     | Subspp | Africa      | --         | -- | -- |
| <i>A. hoeschi</i>           | Pair       | Pair   | Africa      | --         | -- | -- |
| <i>A. richardi</i>          | Pair       | Pair   | Widespread  | --         | -- | -- |
| <i>A. rufulus</i>           | Pair       | Pair   | Indomalayan | --         | -- | -- |
| <i>A. novaeseelandiae</i>   | Pair       | Pair   | Australia   | --         | -- | -- |
| <i>A. leucophrys</i>        | Pair       | Pair   | Africa      | --         | -- | -- |
| <i>A. vaalensis</i>         | Unknown    | Pair   | Africa      | --         | -- | -- |
| <i>A. pallidiventris</i>    | Unknown    | Pair   | Africa      | --         | -- | -- |
| <i>A. melindae</i>          | Pair       | Pair   | Africa      | --         | -- | -- |
| <i>A. campestris</i>        | Pair       | Pair   | Palaearctic | --         | -- | -- |
| <i>A. godlewskii</i>        | Pair       | Pair   | Palaearctic | --         | -- | -- |
| <i>A. berthelotii</i>       | Pair       | Pair   | Palaearctic | --         | -- | -- |
| <i>A. bannermani</i>        | Subspp     | Subspp | Africa      | --         | -- | -- |
| <i>A. latistriatus</i>      | Unknown    | Pair   | Africa      | --         | -- | -- |
| <i>A. similis</i>           | Pair       | Pair   | Widespread  | --         | -- | -- |
| <i>A. nyassae</i>           | Pair       | Pair   | Africa      | --         | -- | -- |
| <i>A. brachyurus</i>        | Unknown    | Pair   | Africa      | --         | -- | -- |
| <i>A. caffer</i>            | Pair       | Pair   | Africa      | --         | -- | -- |
| <i>A. sokokensis</i>        | Unknown    | Pair   | Africa      | --         | -- | -- |
| <i>A. trivialis</i>         | Occasional | Pair   | Palaearctic | [615, 872] | -- | -- |
| <i>A. hodgsoni</i>          | Pair       | Pair   | Palaearctic | [872]      | -- | -- |
| <i>A. gustavi</i>           | Pair       | Pair   | Palaearctic | --         | -- | -- |
| <i>A. pratensis</i>         | Occasional | Pair   | Palaearctic | [615, 872] | -- | -- |
| <i>A. cervinus</i>          | Pair       | Pair   | Palaearctic | [872]      | -- | -- |
| <i>A. roseatus</i>          | Pair       | Pair   | Palaearctic | --         | -- | -- |
| <i>A. petrosus</i>          | Pair       | Pair   | Palaearctic | [615, 872] | -- | -- |
| <i>A. spinoletta</i>        | Pair       | Pair   | Palaearctic | --         | -- | -- |
| <i>A. rubescens</i>         | Pair       | Pair   | Holarctic   | [872, 876] | -- | -- |
| <i>A. sylvanus</i>          | Pair       | Pair   | Palaearctic | [872]      | -- | -- |
| <i>A. nilghiriensis</i>     | Unknown    | Pair   | Indomalayan | --         | -- | -- |
| <i>A. correndera</i>        | Pair       | Pair   | Neotropical | --         | -- | -- |

|                       |             |             |             |            |    |    |
|-----------------------|-------------|-------------|-------------|------------|----|----|
| <i>A. antarcticus</i> | Pair        | Pair        | Neotropical | --         | -- | -- |
| <i>A. spragueii</i>   | Female only | Female only | Nearctic    | [872, 877] | -- | -- |
| <i>A. furcatus</i>    | Female only | Female only | Neotropical | [872, 878] | -- | -- |
| <i>A. hellmayri</i>   | Unknown     | Pair        | Neotropical | [872]      | -- | -- |
| <i>A. bogotensis</i>  | Unknown     | Pair        | Neotropical | --         | -- | -- |
| <i>A. lutescens</i>   | Pair        | Pair        | Neotropical | --         | -- | -- |
| <i>A. chacoensis</i>  | Unknown     | Pair        | Neotropical | --         | -- | -- |
| <i>A. nattereri</i>   | Unknown     | Pair        | Neotropical | --         | -- | -- |
| <i>A. gutturalis</i>  | Unknown     | Pair        | Australia   | --         | -- | -- |

**Passeroidea: Calcarius/Plectrophenax**

|                              |             |             |           |       |                        |       |
|------------------------------|-------------|-------------|-----------|-------|------------------------|-------|
| <i>Calcarius mccownii</i>    | Pair        | Pair        | Nearctic  | [879] | bbdbbbbbbbbbbbbbbbbbba | [804] |
| <i>C. lapponicus</i>         | Pair        | Pair        | Holarctic | [880] | --                     | --    |
| <i>C. pictus</i>             | Cooperation | Cooperation | Nearctic  | [881] | --                     | --    |
| <i>C. ornatus</i>            | Pair        | Pair        | Nearctic  | [882] | --                     | --    |
| <i>Plectrophenax nivalis</i> | Pair        | Pair        | Holarctic | [883] | --                     | --    |
| <i>P. hyperboreus</i>        | Unknown     | Pair        | Nearctic  | [884] | --                     | --    |

**Passeroidea: Emberizidae**

|                                |           |             |             |            |                        |       |
|--------------------------------|-----------|-------------|-------------|------------|------------------------|-------|
| <i>Urocynchramus pylzowi</i>   | Unknown   | Pair        | Palaearctic | [648, 885] | bbdbbbbbbbbbbbbbbbbbba | [804] |
| <i>Melophus lathami</i>        | Pair      | Pair        | Palaearctic | [886]      | --                     | --    |
| <i>Latoucheornis siemsseni</i> | Unknown   | Pair        | Palaearctic | --         | --                     | --    |
| <i>Emberiza citrinella</i>     | Pair      | Pair        | Palaearctic | [883]      | --                     | --    |
| <i>E. leucocephalos</i>        | Pair      | Pair        | Palaearctic | --         | --                     | --    |
| <i>E. stewarti</i>             | Unknown   | Pair        | Palaearctic | [886]      | --                     | --    |
| <i>E. cirrus</i>               | Pair      | Pair        | Palaearctic | [883]      | --                     | --    |
| <i>E. koslowi</i>              | Unknown   | Pair        | Palaearctic | [886]      | --                     | --    |
| <i>E. cia</i>                  | Pair      | Pair        | Palaearctic | [883]      | --                     | --    |
| <i>E. godlewskii</i>           | Pair      | Pair        | Palaearctic | [886]      | --                     | --    |
| <i>E. cioides</i>              | Pair      | Pair        | Palaearctic | --         | --                     | --    |
| <i>E. jankowskii</i>           | Pair      | Pair        | Palaearctic | [455]      | --                     | --    |
| <i>E. buchani</i>              | Pair      | Pair        | Palaearctic | [883]      | --                     | --    |
| <i>E. cineracea</i>            | Unknown   | Pair        | Palaearctic | --         | --                     | --    |
| <i>E. hortulana</i>            | Pair      | Pair        | Palaearctic | --         | --                     | --    |
| <i>E. caesia</i>               | Pair      | Pair        | Palaearctic | --         | --                     | --    |
| <i>E. striolata</i>            | Pair      | Pair        | Palaearctic | [807, 883] | --                     | --    |
| <i>E. impetuani</i>            | Pair      | Pair        | Africa      | [807]      | --                     | --    |
| <i>E. tahapisi</i>             | Pair      | Pair        | Africa      | --         | --                     | --    |
| <i>E. socotrana</i>            | Unknown   | Pair        | Africa      | --         | --                     | --    |
| <i>E. capensis</i>             | Pair      | Pair        | Africa      | --         | --                     | --    |
| <i>E. tristrami</i>            | Unknown   | Pair        | Palaearctic | [886]      | --                     | --    |
| <i>E. fucata</i>               | Suspected | Cooperation | Palaearctic | [161]      | --                     | --    |
| <i>E. pusilla</i>              | Pair      | Pair        | Palaearctic | [883]      | --                     | --    |
| <i>E. chrysophrys</i>          | Pair      | Pair        | Palaearctic | [886]      | --                     | --    |
| <i>E. rustica</i>              | Pair      | Pair        | Palaearctic | [883]      | --                     | --    |

|                                  |             |             |             |            |    |    |
|----------------------------------|-------------|-------------|-------------|------------|----|----|
| <i>E. elegans</i>                | Unknown     | Pair        | Palaearctic | [886]      | -- | -- |
| <i>E. aureola</i>                | Pair        | Pair        | Palaearctic | [883]      | -- | -- |
| <i>E. rutila</i>                 | Pair        | Pair        | Palaearctic | [886]      | -- | -- |
| <i>E. flaviventris</i>           | Pair        | Pair        | Africa      | [807]      | -- | -- |
| <i>E. poliopleura</i>            | Unknown     | Pair        | Africa      | --         | -- | -- |
| <i>E. affinis</i>                | Unknown     | Pair        | Africa      | --         | -- | -- |
| <i>E. cabanisi</i>               | Pair        | Pair        | Africa      | --         | -- | -- |
| <i>E. melanocephala</i>          | Female only | Female only | Palaearctic | [883]      | -- | -- |
| <i>E. bruniceps</i>              | Female only | Female only | Palaearctic | --         | -- | -- |
| <i>E. sulphurata</i>             | Pair        | Pair        | Palaearctic | [886]      | -- | -- |
| <i>E. spodocephala</i>           | Pair        | Pair        | Palaearctic | --         | -- | -- |
| <i>E. variabilis</i>             | Pair        | Pair        | Palaearctic | --         | -- | -- |
| <i>E. pallasi</i>                | Pair        | Pair        | Palaearctic | [883]      | -- | -- |
| <i>E. schoeniclus</i>            | Pair        | Pair        | Palaearctic | --         | -- | -- |
| <i>E. yessoensis</i>             | Pair        | Pair        | Palaearctic | --         | -- | -- |
| <i>Miliaria calandra</i>         | Cooperation | Cooperation | Palaearctic | --         | -- | -- |
| <i>Calamospiza melanocorys</i>   | Cooperation | Cooperation | Nearctic    | [887]      | -- | -- |
| <i>Passerella iliaca</i>         | Pair        | Pair        | Nearctic    | [888]      | -- | -- |
| <i>Melospiza melodia</i>         | Pair        | Pair        | Nearctic    | [889]      | -- | -- |
| <i>M. lincolnii</i>              | Pair        | Pair        | Nearctic    | [890]      | -- | -- |
| <i>M. georgiana</i>              | Pair        | Pair        | Nearctic    | [891]      | -- | -- |
| <i>Zonotrichia capensis</i>      | Pair        | Pair        | Neotropical | [886]      | -- | -- |
| <i>Z. querula</i>                | Pair        | Pair        | Nearctic    | [892]      | -- | -- |
| <i>Z. albicollis</i>             | Pair        | Pair        | Nearctic    | [893]      | -- | -- |
| <i>Z. leucophrys</i>             | Pair        | Pair        | Nearctic    | [894]      | -- | -- |
| <i>Z. atricapilla</i>            | Pair        | Pair        | Nearctic    | [895]      | -- | -- |
| <i>Junco vulcani</i>             | Pair        | Pair        | Neotropical | [480]      | -- | -- |
| <i>J. hyemalis</i>               | Pair        | Pair        | Nearctic    | [896]      | -- | -- |
| <i>J. insularis</i>              | Unknown     | Pair        | Nearctic    | [886]      | -- | -- |
| <i>J. phaeonotus</i>             | Occasional  | Pair        | Nearctic    | [897]      | -- | -- |
| <i>Passerculus sandwichensis</i> | Pair        | Pair        | Nearctic    | [898]      | -- | -- |
| <i>P. rostratus</i>              | Subspp      | Subspp      | Nearctic    | [886]      | -- | -- |
| <i>Ammodramus maritimus</i>      | Pair        | Pair        | Nearctic    | [899]      | -- | -- |
| <i>A. caudacutus</i>             | Pair        | Pair        | Nearctic    | [900]      | -- | -- |
| <i>A. leconteii</i>              | Pair        | Pair        | Nearctic    | [901]      | -- | -- |
| <i>A. henslowii</i>              | Occasional  | Pair        | Nearctic    | [902]      | -- | -- |
| <i>A. bairdii</i>                | Pair        | Pair        | Nearctic    | [903]      | -- | -- |
| <i>A. savannarum</i>             | Cooperation | Cooperation | Nearctic    | [904, 905] | -- | -- |
| <i>A. humeralis</i>              | Unknown     | Pair        | Neotropical | [886]      | -- | -- |
| <i>A. aurifrons</i>              | Unknown     | Pair        | Neotropical | --         | -- | -- |
| <i>Xenospiza baileyi</i>         | Pair        | Pair        | Neotropical | [906]      | -- | -- |
| <i>Spizella arborea</i>          | Pair        | Pair        | Nearctic    | [907]      | -- | -- |
| <i>S. passerina</i>              | Suspected   | Cooperation | Nearctic    | [908]      | -- | -- |

|                                |             |             |             |            |    |    |
|--------------------------------|-------------|-------------|-------------|------------|----|----|
| <i>S. pallida</i>              | Pair        | Pair        | Nearctic    | [909]      | -- | -- |
| <i>S. taverneri</i>            | Pair        | Pair        | Nearctic    | [886]      | -- | -- |
| <i>S. breweri</i>              | Occasional  | Pair        | Nearctic    | [910, 911] | -- | -- |
| <i>S. pusilla</i>              | Pair        | Pair        | Nearctic    | [912]      | -- | -- |
| <i>S. wortheni</i>             | Pair        | Pair        | Neotropical | [913]      | -- | -- |
| <i>S. atrogularis</i>          | Pair        | Pair        | Nearctic    | [914]      | -- | -- |
| <i>Poocetes gramineus</i>      | Pair        | Pair        | Nearctic    | [915]      | -- | -- |
| <i>Chondestes grammacus</i>    | Pair        | Pair        | Nearctic    | [916]      | -- | -- |
| <i>Amphispiza bilineata</i>    | Pair        | Pair        | Nearctic    | [917]      | -- | -- |
| <i>A. belli</i>                | Pair        | Pair        | Nearctic    | [918]      | -- | -- |
| <i>Aimophila quinquestrata</i> | Pair        | Pair        | Neotropical | [919]      | -- | -- |
| <i>A. mystacalis</i>           | Unknown     | Pair        | Neotropical | [886]      | -- | -- |
| <i>A. humeralis</i>            | Unknown     | Pair        | Neotropical | --         | -- | -- |
| <i>A. ruficauda</i>            | Cooperation | Cooperation | Neotropical | --         | -- | -- |
| <i>A. sumichrasti</i>          | Unknown     | Pair        | Neotropical | --         | -- | -- |
| <i>A. strigiceps</i>           | Unknown     | Pair        | Neotropical | --         | -- | -- |
| <i>A. stolzmanni</i>           | Pair        | Pair        | Neotropical | --         | -- | -- |
| <i>A. aestivalis</i>           | Pair        | Pair        | Nearctic    | [920]      | -- | -- |
| <i>A. botterii</i>             | Pair        | Pair        | Neotropical | [921]      | -- | -- |
| <i>A. cassinii</i>             | Pair        | Pair        | Nearctic    | [922]      | -- | -- |
| <i>A. carpalis</i>             | Pair        | Pair        | Nearctic    | [923]      | -- | -- |
| <i>A. ruficeps</i>             | Pair        | Pair        | Nearctic    | [924]      | -- | -- |
| <i>A. notosticta</i>           | Unknown     | Pair        | Neotropical | [886]      | -- | -- |
| <i>A. rufescens</i>            | Pair        | Pair        | Neotropical | --         | -- | -- |
| <i>Torreornis inexpectata</i>  | Unknown     | Pair        | Neotropical | [380]      | -- | -- |
| <i>Oriturus superciliosus</i>  | Pair        | Pair        | Neotropical | [886]      | -- | -- |
| <i>Pipilo chlorurus</i>        | Pair        | Pair        | Nearctic    | [925]      | -- | -- |
| <i>P. ocai</i>                 | Unknown     | Pair        | Neotropical | [886]      | -- | -- |
| <i>P. erythrophthalmus</i>     | Pair        | Pair        | Nearctic    | [926, 927] | -- | -- |
| <i>P. aberti</i>               | Pair        | Pair        | Nearctic    | [928]      | -- | -- |
| <i>P. crissalis</i>            | Pair        | Pair        | Nearctic    | [929]      | -- | -- |
| <i>P. fuscus</i>               | Pair        | Pair        | Nearctic    | [930]      | -- | -- |
| <i>P. albicollis</i>           | Pair        | Pair        | Neotropical | [886]      | -- | -- |
| <i>Melozone kieneri</i>        | Pair        | Pair        | Neotropical | --         | -- | -- |
| <i>M. biarcuatum</i>           | Pair        | Pair        | Neotropical | --         | -- | -- |
| <i>M. leucotis</i>             | Pair        | Pair        | Neotropical | --         | -- | -- |
| <i>Arremon aurantirostris</i>  | Pair        | Pair        | Neotropical | [931]      | -- | -- |
| <i>A. schlegeli</i>            | Unknown     | Pair        | Neotropical | [932]      | -- | -- |
| <i>A. taciturnus</i>           | Pair        | Pair        | Neotropical | [79]       | -- | -- |
| <i>A. abeillei</i>             | Unknown     | Pair        | Neotropical | [481]      | -- | -- |
| <i>A. flavirostris</i>         | Pair        | Pair        | Neotropical | [933]      | -- | -- |
| <i>Arremonops rufivirgatus</i> | Pair        | Pair        | Neotropical | [934]      | -- | -- |
| <i>A. tocuyensis</i>           | Pair        | Pair        | Neotropical | [886]      | -- | -- |

|                               |         |      |             |            |    |    |
|-------------------------------|---------|------|-------------|------------|----|----|
| <i>A. chloronotus</i>         | Pair    | Pair | Neotropical | --         | -- | -- |
| <i>A. conirostris</i>         | Pair    | Pair | Neotropical | --         | -- | -- |
| <i>Atlapetes albinucha</i>    | Unknown | Pair | Neotropical | [935]      | -- | -- |
| <i>A. gutturalis</i>          | Unknown | Pair | Neotropical | [480]      | -- | -- |
| <i>A. pallidinucha</i>        | Unknown | Pair | Neotropical | [79]       | -- | -- |
| <i>A. rufinucha</i>           | Unknown | Pair | Neotropical | --         | -- | -- |
| <i>A. leucopis</i>            | Unknown | Pair | Neotropical | [936]      | -- | -- |
| <i>A. pileatus</i>            | Unknown | Pair | Neotropical | [935]      | -- | -- |
| <i>A. melanocephalus</i>      | Unknown | Pair | Neotropical | [370]      | -- | -- |
| <i>A. flaviceps</i>           | Unknown | Pair | Neotropical | [380]      | -- | -- |
| <i>A. fuscolivaceus</i>       | Unknown | Pair | Neotropical | [370]      | -- | -- |
| <i>A. tricolor</i>            | Unknown | Pair | Neotropical | --         | -- | -- |
| <i>A. albofrenatus</i>        | Unknown | Pair | Neotropical | [79]       | -- | -- |
| <i>A. schistaceus</i>         | Unknown | Pair | Neotropical | --         | -- | -- |
| <i>A. seebohmi</i>            | Unknown | Pair | Neotropical | [481]      | -- | -- |
| <i>A. nationi</i>             | Unknown | Pair | Neotropical | [384]      | -- | -- |
| <i>A. leucopterus</i>         | Unknown | Pair | Neotropical | --         | -- | -- |
| <i>A. albiceps</i>            | Unknown | Pair | Neotropical | [935]      | -- | -- |
| <i>A. pallidiceps</i>         | Pair    | Pair | Neotropical | [937]      | -- | -- |
| <i>A. rufigenis</i>           | Unknown | Pair | Neotropical | [384]      | -- | -- |
| <i>A. semirufus</i>           | Unknown | Pair | Neotropical | [79]       | -- | -- |
| <i>A. personatus</i>          | Unknown | Pair | Neotropical | --         | -- | -- |
| <i>A. fulviceps</i>           | Unknown | Pair | Neotropical | [384]      | -- | -- |
| <i>A. citrinellus</i>         | Unknown | Pair | Neotropical | --         | -- | -- |
| <i>A. brunneinucha</i>        | Pair    | Pair | Neotropical | [480]      | -- | -- |
| <i>A. virenticeps</i>         | Unknown | Pair | Neotropical | [935]      | -- | -- |
| <i>A. atricapillus</i>        | Pair    | Pair | Neotropical | [480]      | -- | -- |
| <i>A. torquatus</i>           | Pair    | Pair | Neotropical | [933]      | -- | -- |
| <i>Pezopetes capitalis</i>    | Pair    | Pair | Neotropical | [480]      | -- | -- |
| <i>Pselliophorus tibialis</i> | Unknown | Pair | Neotropical | --         | -- | -- |
| <i>P. luteoviridis</i>        | Unknown | Pair | Neotropical | [445]      | -- | -- |
| <i>Lysurus crassirostris</i>  | Unknown | Pair | Neotropical | [938, 939] | -- | -- |
| <i>L. castaneiceps</i>        | Unknown | Pair | Neotropical | [940]      | -- | -- |
| <i>Gubernatrix cristata</i>   | Unknown | Pair | Neotropical | [380]      | -- | -- |
| <i>Paroaria coronata</i>      | Unknown | Pair | Neotropical | [481]      | -- | -- |
| <i>P. dominicana</i>          | Unknown | Pair | Neotropical | --         | -- | -- |
| <i>P. gularis</i>             | Pair    | Pair | Neotropical | [941]      | -- | -- |
| <i>P. baeri</i>               | Unknown | Pair | Neotropical | [481]      | -- | -- |
| <i>P. capitata</i>            | Unknown | Pair | Neotropical | --         | -- | -- |
| <i>Coereba flaveola</i>       | Pair    | Pair | Neotropical | [480]      | -- | -- |
| <i>Conirostrum speciosum</i>  | Unknown | Pair | Neotropical | [79]       | -- | -- |
| <i>C. leucogenys</i>          | Unknown | Pair | Neotropical | --         | -- | -- |
| <i>C. bicolor</i>             | Pair    | Pair | Neotropical | [482]      | -- | -- |

|                                    |             |             |             |            |    |    |
|------------------------------------|-------------|-------------|-------------|------------|----|----|
| <i>C. margaritae</i>               | Unknown     | Pair        | Neotropical | [481]      | -- | -- |
| <i>C. cinereum</i>                 | Unknown     | Pair        | Neotropical | [384]      | -- | -- |
| <i>C. tamarugense</i>              | Unknown     | Pair        | Neotropical | [942]      | -- | -- |
| <i>C. ferrugineiventre</i>         | Unknown     | Pair        | Neotropical | [384]      | -- | -- |
| <i>C. rufum</i>                    | Unknown     | Pair        | Neotropical | [79]       | -- | -- |
| <i>C. sitticolor</i>               | Unknown     | Pair        | Neotropical | --         | -- | -- |
| <i>C. albifrons</i>                | Unknown     | Pair        | Neotropical | --         | -- | -- |
| <i>Oreomanes fraseri</i>           | Unknown     | Pair        | Neotropical | [943]      | -- | -- |
| <i>Orchesticus abeillei</i>        | Unknown     | Pair        | Neotropical | --         | -- | -- |
| <i>Schistochlamys ruficapillus</i> | Unknown     | Pair        | Neotropical | --         | -- | -- |
| <i>S. melanopis</i>                | Unknown     | Pair        | Neotropical | [79]       | -- | -- |
| <i>Neothraupis fasciata</i>        | Cooperation | Cooperation | Neotropical | [944]      | -- | -- |
| <i>Cypsnagra hirundinacea</i>      | Cooperation | Cooperation | Neotropical | [943]      | -- | -- |
| <i>Conothraupis speculigera</i>    | Unknown     | Pair        | Neotropical | --         | -- | -- |
| <i>C. mesoleuca</i>                | Unknown     | Pair        | Neotropical | [380]      | -- | -- |
| <i>Lamprospiza melanoleuca</i>     | Unknown     | Pair        | Neotropical | [943]      | -- | -- |
| <i>Cissopis leveriana</i>          | Unknown     | Pair        | Neotropical | --         | -- | -- |
| <i>Chlorornis riefferii</i>        | Unknown     | Pair        | Neotropical | --         | -- | -- |
| <i>Compsothraupis loricata</i>     | Suspected   | Cooperation | Neotropical | [943, 945] | -- | -- |
| <i>Sericossypha albocristata</i>   | Unknown     | Cooperation | Neotropical | [943]      | -- | -- |
| <i>Nesospingus speculiferus</i>    | Unknown     | Pair        | Neotropical | --         | -- | -- |
| <i>Chlorospingus ophthalmicus</i>  | Pair        | Pair        | Neotropical | --         | -- | -- |
| <i>C. tacarcunae</i>               | Unknown     | Pair        | Neotropical | --         | -- | -- |
| <i>C. inornatus</i>                | Unknown     | Pair        | Neotropical | --         | -- | -- |
| <i>C. semifuscus</i>               | Pair        | Pair        | Neotropical | [946]      | -- | -- |
| <i>C. pileatus</i>                 | Unknown     | Pair        | Neotropical | [943]      | -- | -- |
| <i>C. parvirostris</i>             | Unknown     | Pair        | Neotropical | --         | -- | -- |
| <i>C. flavigularis</i>             | Unknown     | Pair        | Neotropical | --         | -- | -- |
| <i>C. flavovirens</i>              | Unknown     | Pair        | Neotropical | [380]      | -- | -- |
| <i>C. canigularis</i>              | Unknown     | Pair        | Neotropical | [943]      | -- | -- |
| <i>Cnemoscopus rubrirostris</i>    | Unknown     | Pair        | Neotropical | --         | -- | -- |
| <i>Hemispingus atropileus</i>      | Unknown     | Pair        | Neotropical | --         | -- | -- |
| <i>H. calophrys</i>                | Unknown     | Pair        | Neotropical | --         | -- | -- |
| <i>H. parodii</i>                  | Unknown     | Pair        | Neotropical | --         | -- | -- |
| <i>H. superciliaris</i>            | Unknown     | Pair        | Neotropical | --         | -- | -- |
| <i>H. reyi</i>                     | Unknown     | Pair        | Neotropical | --         | -- | -- |
| <i>H. frontalis</i>                | Unknown     | Pair        | Neotropical | --         | -- | -- |
| <i>H. melanotis</i>                | Unknown     | Pair        | Neotropical | --         | -- | -- |
| <i>H. goeringi</i>                 | Unknown     | Pair        | Neotropical | [380]      | -- | -- |
| <i>H. rufosuperciliaris</i>        | Unknown     | Pair        | Neotropical | [445]      | -- | -- |
| <i>H. verticalis</i>               | Unknown     | Pair        | Neotropical | [943]      | -- | -- |
| <i>H. xanthophthalmus</i>          | Unknown     | Pair        | Neotropical | --         | -- | -- |
| <i>H. trifasciatus</i>             | Unknown     | Pair        | Neotropical | --         | -- | -- |

|                                  |             |             |             |            |    |    |
|----------------------------------|-------------|-------------|-------------|------------|----|----|
| <i>Pyrhocomma ruficeps</i>       | Unknown     | Pair        | Neotropical | --         | -- | -- |
| <i>Thlypopsis fulviceps</i>      | Unknown     | Pair        | Neotropical | --         | -- | -- |
| <i>T. ornata</i>                 | Unknown     | Pair        | Neotropical | --         | -- | -- |
| <i>T. pectoralis</i>             | Unknown     | Pair        | Neotropical | --         | -- | -- |
| <i>T. sordida</i>                | Unknown     | Pair        | Neotropical | --         | -- | -- |
| <i>T. inornata</i>               | Unknown     | Pair        | Neotropical | --         | -- | -- |
| <i>T. ruficeps</i>               | Unknown     | Pair        | Neotropical | --         | -- | -- |
| <i>Hemithraupis guira</i>        | Unknown     | Pair        | Neotropical | --         | -- | -- |
| <i>H. ruficapilla</i>            | Unknown     | Pair        | Neotropical | --         | -- | -- |
| <i>H. flavicollis</i>            | Unknown     | Pair        | Neotropical | --         | -- | -- |
| <i>Chrysothlypis chrysomelas</i> | Unknown     | Cooperation | Neotropical | [947]      | -- | -- |
| <i>C. salmoni</i>                | Cooperation | Cooperation | Neotropical | [943]      | -- | -- |
| <i>Nemosia pileata</i>           | Pair        | Pair        | Neotropical | --         | -- | -- |
| <i>N. rourei</i>                 | Unknown     | Cooperation | Neotropical | [380, 948] | -- | -- |
| <i>Phaenicophilus palmarum</i>   | Unknown     | Pair        | Neotropical | [943]      | -- | -- |
| <i>P. poliocephalus</i>          | Unknown     | Pair        | Neotropical | --         | -- | -- |
| <i>Calyptophilus frugivorus</i>  | Unknown     | Pair        | Neotropical | [380]      | -- | -- |
| <i>Rhodinocichla rosea</i>       | Pair        | Pair        | Neotropical | [943]      | -- | -- |
| <i>Mitrospingus cassinii</i>     | Cooperation | Cooperation | Neotropical | --         | -- | -- |
| <i>M. oleagineus</i>             | Unknown     | Cooperation | Neotropical | --         | -- | -- |
| <i>Chlorothraupis carmioli</i>   | Unknown     | Pair        | Neotropical | --         | -- | -- |
| <i>C. olivacea</i>               | Unknown     | Pair        | Neotropical | --         | -- | -- |
| <i>C. stolzmanni</i>             | Unknown     | Pair        | Neotropical | --         | -- | -- |
| <i>Orthogonys chloricterus</i>   | Unknown     | Pair        | Neotropical | --         | -- | -- |
| <i>Eucometis penicillata</i>     | Pair        | Pair        | Neotropical | --         | -- | -- |
| <i>Lanio fulvus</i>              | Unknown     | Pair        | Neotropical | --         | -- | -- |
| <i>L. versicolor</i>             | Unknown     | Pair        | Neotropical | [949]      | -- | -- |
| <i>L. aurantius</i>              | Unknown     | Pair        | Neotropical | [943]      | -- | -- |
| <i>L. leucothorax</i>            | Unknown     | Pair        | Neotropical | --         | -- | -- |
| <i>Creurgops verticalis</i>      | Unknown     | Pair        | Neotropical | --         | -- | -- |
| <i>C. dentata</i>                | Unknown     | Pair        | Neotropical | --         | -- | -- |
| <i>Heterospingus rubrifrons</i>  | Unknown     | Pair        | Neotropical | --         | -- | -- |
| <i>H. xanthopygius</i>           | Unknown     | Pair        | Neotropical | --         | -- | -- |
| <i>Tachyphonus cristatus</i>     | Unknown     | Pair        | Neotropical | --         | -- | -- |
| <i>T. rufiventer</i>             | Unknown     | Pair        | Neotropical | --         | -- | -- |
| <i>T. surinamus</i>              | Unknown     | Pair        | Neotropical | --         | -- | -- |
| <i>T. luctuosus</i>              | Unknown     | Pair        | Neotropical | --         | -- | -- |
| <i>T. delatrii</i>               | Unknown     | Pair        | Neotropical | --         | -- | -- |
| <i>T. coronatus</i>              | Pair        | Pair        | Neotropical | --         | -- | -- |
| <i>T. rufus</i>                  | Pair        | Pair        | Neotropical | --         | -- | -- |
| <i>T. phoenicius</i>             | Unknown     | Pair        | Neotropical | --         | -- | -- |
| <i>Trichothraupis melanops</i>   | Unknown     | Pair        | Neotropical | --         | -- | -- |
| <i>Habia rubica</i>              | Pair        | Pair        | Neotropical | [950]      | -- | -- |



|                                      |             |             |             |            |    |    |
|--------------------------------------|-------------|-------------|-------------|------------|----|----|
| <i>H. fuscicauda</i>                 | Cooperation | Cooperation | Neotropical | [943]      | -- | -- |
| <i>H. gutturalis</i>                 | Unknown     | Cooperation | Neotropical | --         | -- | -- |
| <i>H. atrimaxillaris</i>             | Unknown     | Cooperation | Neotropical | [445]      | -- | -- |
| <i>H. cristata</i>                   | Unknown     | Cooperation | Neotropical | [943]      | -- | -- |
| <i>Piranga bidentata</i>             | Unknown     | Pair        | Neotropical | --         | -- | -- |
| <i>P. flava</i>                      | Pair        | Pair        | Neotropical | [943, 951] | -- | -- |
| <i>P. rubra</i>                      | Pair        | Pair        | Nearctic    | [952]      | -- | -- |
| <i>P. roseogularis</i>               | Unknown     | Pair        | Neotropical | [943]      | -- | -- |
| <i>P. olivacea</i>                   | Pair        | Pair        | Nearctic    | [953]      | -- | -- |
| <i>P. ludoviciana</i>                | Pair        | Pair        | Nearctic    | [954]      | -- | -- |
| <i>P. leucoptera</i>                 | Unknown     | Pair        | Neotropical | [943]      | -- | -- |
| <i>P. erythrocephala</i>             | Unknown     | Pair        | Neotropical | --         | -- | -- |
| <i>P. rubriceps</i>                  | Unknown     | Pair        | Neotropical | --         | -- | -- |
| <i>Calochaetes coccineus</i>         | Unknown     | Cooperation | Neotropical | --         | -- | -- |
| <i>Ramphocelus sanguinolentus</i>    | Unknown     | Pair        | Neotropical | --         | -- | -- |
| <i>R. nigrogularis</i>               | Unknown     | Cooperation | Neotropical | --         | -- | -- |
| <i>R. dimidiatus</i>                 | Unknown     | Pair        | Neotropical | --         | -- | -- |
| <i>R. melanogaster</i>               | Unknown     | Cooperation | Neotropical | --         | -- | -- |
| <i>R. carbo</i>                      | Unknown     | Cooperation | Neotropical | [79]       | -- | -- |
| <i>R. bresilius</i>                  | Suspected   | Cooperation | Neotropical | [943, 945] | -- | -- |
| <i>R. passerinii</i>                 | Pair        | Pair        | Neotropical | [943]      | -- | -- |
| <i>R. flammigerus</i>                | Pair        | Pair        | Neotropical | --         | -- | -- |
| <i>Spindalis zena</i>                | Unknown     | Pair        | Neotropical | --         | -- | -- |
| <i>Thraupis episcopus</i>            | Pair        | Pair        | Neotropical | [955]      | -- | -- |
| <i>T. glaucocolpa</i>                | Unknown     | Pair        | Neotropical | [943]      | -- | -- |
| <i>T. sayaca</i>                     | Pair        | Pair        | Neotropical | --         | -- | -- |
| <i>T. cyanoptera</i>                 | Unknown     | Pair        | Neotropical | --         | -- | -- |
| <i>T. ornata</i>                     | Unknown     | Pair        | Neotropical | --         | -- | -- |
| <i>T. abbas</i>                      | Pair        | Pair        | Neotropical | --         | -- | -- |
| <i>T. palmarum</i>                   | Pair        | Pair        | Neotropical | --         | -- | -- |
| <i>T. cyanocephala</i>               | Unknown     | Pair        | Neotropical | --         | -- | -- |
| <i>T. bonariensis</i>                | Unknown     | Pair        | Neotropical | --         | -- | -- |
| <i>Cyanicterus cyanicterus</i>       | Unknown     | Pair        | Neotropical | --         | -- | -- |
| <i>Bangsia arcaei</i>                | Unknown     | Pair        | Neotropical | --         | -- | -- |
| <i>B. melanochlamys</i>              | Unknown     | Pair        | Neotropical | [380]      | -- | -- |
| <i>B. rothschildi</i>                | Unknown     | Pair        | Neotropical | [943]      | -- | -- |
| <i>B. edwardsi</i>                   | Unknown     | Pair        | Neotropical | [956]      | -- | -- |
| <i>B. aureocincta</i>                | Unknown     | Pair        | Neotropical | [943]      | -- | -- |
| <i>Buthraupis montana</i>            | Unknown     | Pair        | Neotropical | --         | -- | -- |
| <i>B. eximia</i>                     | Unknown     | Pair        | Neotropical | --         | -- | -- |
| <i>B. aureodorsalis</i>              | Unknown     | Pair        | Neotropical | --         | -- | -- |
| <i>B. wetmorei</i>                   | Unknown     | Pair        | Neotropical | --         | -- | -- |
| <i>Wetmorethraupis sterrhopteron</i> | Unknown     | Pair        | Neotropical | --         | -- | -- |

|                                     |           |             |             |       |    |    |
|-------------------------------------|-----------|-------------|-------------|-------|----|----|
| <i>Anisognathus melanogenys</i>     | Unknown   | Pair        | Neotropical | --    | -- | -- |
| <i>A. lacrymosus</i>                | Unknown   | Pair        | Neotropical | --    | -- | -- |
| <i>A. igniventris</i>               | Unknown   | Pair        | Neotropical | --    | -- | -- |
| <i>A. somptuosus</i>                | Unknown   | Pair        | Neotropical | [957] | -- | -- |
| <i>A. notabilis</i>                 | Unknown   | Pair        | Neotropical | --    | -- | -- |
| <i>Stephanophorus diadematus</i>    | Unknown   | Pair        | Neotropical | [943] | -- | -- |
| <i>Iridosornis porphyrocephala</i>  | Unknown   | Pair        | Neotropical | --    | -- | -- |
| <i>I. analis</i>                    | Unknown   | Pair        | Neotropical | --    | -- | -- |
| <i>I. jelskii</i>                   | Unknown   | Pair        | Neotropical | --    | -- | -- |
| <i>I. rufivertex</i>                | Unknown   | Pair        | Neotropical | --    | -- | -- |
| <i>I. reinhardti</i>                | Unknown   | Pair        | Neotropical | --    | -- | -- |
| <i>Dubusia taeniata</i>             | Unknown   | Pair        | Neotropical | --    | -- | -- |
| <i>Delothraupis castaneiventris</i> | Unknown   | Pair        | Neotropical | --    | -- | -- |
| <i>Pipraeidea melanonota</i>        | Pair      | Pair        | Neotropical | --    | -- | -- |
| <i>Euphonia jamaica</i>             | Unknown   | Pair        | Neotropical | --    | -- | -- |
| <i>E. plumbea</i>                   | Unknown   | Pair        | Neotropical | --    | -- | -- |
| <i>E. affinis</i>                   | Unknown   | Pair        | Neotropical | --    | -- | -- |
| <i>E. luteicapilla</i>              | Pair      | Pair        | Neotropical | --    | -- | -- |
| <i>E. chlorotica</i>                | Pair      | Pair        | Neotropical | --    | -- | -- |
| <i>E. trinitatis</i>                | Pair      | Pair        | Neotropical | --    | -- | -- |
| <i>E. concinna</i>                  | Unknown   | Pair        | Neotropical | --    | -- | -- |
| <i>E. saturata</i>                  | Unknown   | Pair        | Neotropical | --    | -- | -- |
| <i>E. finschi</i>                   | Unknown   | Pair        | Neotropical | --    | -- | -- |
| <i>E. violacea</i>                  | Pair      | Pair        | Neotropical | --    | -- | -- |
| <i>E. laniirostris</i>              | Suspected | Cooperation | Neotropical | --    | -- | -- |
| <i>E. hirundinacea</i>              | Pair      | Pair        | Neotropical | [958] | -- | -- |
| <i>E. chalybea</i>                  | Unknown   | Pair        | Neotropical | [943] | -- | -- |
| <i>E. elegantissima</i>             | Unknown   | Pair        | Neotropical | --    | -- | -- |
| <i>E. musica</i>                    | Unknown   | Pair        | Neotropical | --    | -- | -- |
| <i>E. cyanocephala</i>              | Unknown   | Pair        | Neotropical | --    | -- | -- |
| <i>E. imitans</i>                   | Pair      | Pair        | Neotropical | --    | -- | -- |
| <i>E. fulvicrissa</i>               | Unknown   | Pair        | Neotropical | --    | -- | -- |
| <i>E. gouldi</i>                    | Unknown   | Pair        | Neotropical | --    | -- | -- |
| <i>E. chrysopasta</i>               | Unknown   | Pair        | Neotropical | --    | -- | -- |
| <i>E. mesochrysa</i>                | Unknown   | Pair        | Neotropical | --    | -- | -- |
| <i>E. minuta</i>                    | Pair      | Pair        | Neotropical | --    | -- | -- |
| <i>E. anae</i>                      | Unknown   | Pair        | Neotropical | --    | -- | -- |
| <i>E. xanthogaster</i>              | Unknown   | Pair        | Neotropical | --    | -- | -- |
| <i>E. rufiventris</i>               | Unknown   | Pair        | Neotropical | --    | -- | -- |
| <i>E. cayennensis</i>               | Unknown   | Pair        | Neotropical | --    | -- | -- |
| <i>E. pectoralis</i>                | Unknown   | Pair        | Neotropical | [959] | -- | -- |
| <i>Chlorophonia flavirostris</i>    | Unknown   | Pair        | Neotropical | [943] | -- | -- |
| <i>C. cyanea</i>                    | Pair      | Pair        | Neotropical | --    | -- | -- |

|                                 |             |             |             |            |    |    |
|---------------------------------|-------------|-------------|-------------|------------|----|----|
| <i>C. pyrrhophrys</i>           | Unknown     | Pair        | Neotropical | --         | -- | -- |
| <i>C. occipitalis</i>           | Unknown     | Pair        | Neotropical | --         | -- | -- |
| <i>C. callophrys</i>            | Pair        | Pair        | Neotropical | --         | -- | -- |
| <i>Chlorochrysa phoenicotis</i> | Unknown     | Pair        | Neotropical | --         | -- | -- |
| <i>C. calliparaea</i>           | Unknown     | Pair        | Neotropical | --         | -- | -- |
| <i>C. nitidissima</i>           | Unknown     | Pair        | Neotropical | [380]      | -- | -- |
| <i>Tangara inornata</i>         | Cooperation | Cooperation | Neotropical | [943]      | -- | -- |
| <i>T. mexicana</i>              | Cooperation | Cooperation | Neotropical | --         | -- | -- |
| <i>T. cabanisi</i>              | Cooperation | Cooperation | Neotropical | [960]      | -- | -- |
| <i>T. palmeri</i>               | Unknown     | Cooperation | Neotropical | [943]      | -- | -- |
| <i>T. chilensis</i>             | Unknown     | Cooperation | Neotropical | [961]      | -- | -- |
| <i>T. fastuosa</i>              | Unknown     | Cooperation | Neotropical | [380]      | -- | -- |
| <i>T. seledon</i>               | Unknown     | Cooperation | Neotropical | [943]      | -- | -- |
| <i>T. cyanocephala</i>          | Unknown     | Cooperation | Neotropical | --         | -- | -- |
| <i>T. desmaresti</i>            | Unknown     | Cooperation | Neotropical | --         | -- | -- |
| <i>T. cyanoventris</i>          | Cooperation | Cooperation | Neotropical | --         | -- | -- |
| <i>T. johannae</i>              | Unknown     | Pair        | Neotropical | --         | -- | -- |
| <i>T. schrankii</i>             | Unknown     | Pair        | Neotropical | [962]      | -- | -- |
| <i>T. florida</i>               | Unknown     | Pair        | Neotropical | [943]      | -- | -- |
| <i>T. arthus</i>                | Unknown     | Pair        | Neotropical | --         | -- | -- |
| <i>T. icterocephala</i>         | Pair        | Pair        | Neotropical | --         | -- | -- |
| <i>T. xanthocephala</i>         | Unknown     | Pair        | Neotropical | --         | -- | -- |
| <i>T. chrysotis</i>             | Unknown     | Pair        | Neotropical | --         | -- | -- |
| <i>T. parzudakii</i>            | Unknown     | Pair        | Neotropical | --         | -- | -- |
| <i>T. xanthogastra</i>          | Unknown     | Pair        | Neotropical | --         | -- | -- |
| <i>T. punctata</i>              | Unknown     | Pair        | Neotropical | --         | -- | -- |
| <i>T. guttata</i>               | Cooperation | Cooperation | Neotropical | --         | -- | -- |
| <i>T. varia</i>                 | Unknown     | Cooperation | Neotropical | --         | -- | -- |
| <i>T. rufigula</i>              | Unknown     | Cooperation | Neotropical | --         | -- | -- |
| <i>T. gyrola</i>                | Pair        | Pair        | Neotropical | [482, 943] | -- | -- |
| <i>T. lavinia</i>               | Unknown     | Pair        | Neotropical | [947]      | -- | -- |
| <i>T. cayana</i>                | Unknown     | Pair        | Neotropical | [943]      | -- | -- |
| <i>T. cucullata</i>             | Unknown     | Pair        | Neotropical | --         | -- | -- |
| <i>T. peruviana</i>             | Unknown     | Pair        | Neotropical | [963]      | -- | -- |
| <i>T. preciosa</i>              | Unknown     | Pair        | Neotropical | [943]      | -- | -- |
| <i>T. vitriolina</i>            | Unknown     | Pair        | Neotropical | --         | -- | -- |
| <i>T. meyerdeschauenseei</i>    | Unknown     | Pair        | Neotropical | [380]      | -- | -- |
| <i>T. rufigenis</i>             | Unknown     | Pair        | Neotropical | [943]      | -- | -- |
| <i>T. ruficervix</i>            | Unknown     | Pair        | Neotropical | --         | -- | -- |
| <i>T. labradorides</i>          | Unknown     | Pair        | Neotropical | --         | -- | -- |
| <i>T. cyanotis</i>              | Unknown     | Pair        | Neotropical | --         | -- | -- |
| <i>T. cyanicollis</i>           | Unknown     | Pair        | Neotropical | --         | -- | -- |
| <i>T. larvata</i>               | Cooperation | Cooperation | Neotropical | --         | -- | -- |

|                                 |             |             |             |            |    |    |
|---------------------------------|-------------|-------------|-------------|------------|----|----|
| <i>T. nigrocincta</i>           | Unknown     | Pair        | Neotropical | --         | -- | -- |
| <i>T. dowii</i>                 | Unknown     | Pair        | Neotropical | --         | -- | -- |
| <i>T. fucosa</i>                | Unknown     | Cooperation | Neotropical | --         | -- | -- |
| <i>T. nigroviridis</i>          | Unknown     | Pair        | Neotropical | --         | -- | -- |
| <i>T. vassorii</i>              | Unknown     | Pair        | Neotropical | --         | -- | -- |
| <i>T. heinei</i>                | Unknown     | Pair        | Neotropical | --         | -- | -- |
| <i>T. phillipsi</i>             | Unknown     | Pair        | Neotropical | [380]      | -- | -- |
| <i>T. viridicollis</i>          | Unknown     | Pair        | Neotropical | [943]      | -- | -- |
| <i>T. argyrofenges</i>          | Unknown     | Pair        | Neotropical | --         | -- | -- |
| <i>T. cyanoptera</i>            | Unknown     | Pair        | Neotropical | --         | -- | -- |
| <i>T. velia</i>                 | Unknown     | Pair        | Neotropical | --         | -- | -- |
| <i>T. callophrys</i>            | Unknown     | Pair        | Neotropical | --         | -- | -- |
| <i>Iridophanes pulcherrima</i>  | Unknown     | Pair        | Neotropical | --         | -- | -- |
| <i>Pseudodacnis hartlaubi</i>   | Unknown     | Pair        | Neotropical | [380]      | -- | -- |
| <i>Dacnis albiventris</i>       | Unknown     | Pair        | Neotropical | [943]      | -- | -- |
| <i>D. lineata</i>               | Unknown     | Pair        | Neotropical | --         | -- | -- |
| <i>D. flaviventer</i>           | Unknown     | Pair        | Neotropical | --         | -- | -- |
| <i>D. nigripes</i>              | Unknown     | Pair        | Neotropical | [380]      | -- | -- |
| <i>D. venusta</i>               | Unknown     | Cooperation | Neotropical | [943]      | -- | -- |
| <i>D. cayana</i>                | Cooperation | Cooperation | Neotropical | --         | -- | -- |
| <i>D. viguieri</i>              | Unknown     | Pair        | Neotropical | --         | -- | -- |
| <i>D. berlepschi</i>            | Unknown     | Pair        | Neotropical | [380]      | -- | -- |
| <i>Chlorophanes spiza</i>       | Pair        | Pair        | Neotropical | [943]      | -- | -- |
| <i>Cyanerpes nitidus</i>        | Unknown     | Pair        | Neotropical | --         | -- | -- |
| <i>C. lucidus</i>               | Pair        | Pair        | Neotropical | --         | -- | -- |
| <i>C. caeruleus</i>             | Pair        | Pair        | Neotropical | --         | -- | -- |
| <i>C. cyaneus</i>               | Pair        | Pair        | Neotropical | --         | -- | -- |
| <i>Xenodacnis parina</i>        | Unknown     | Pair        | Neotropical | --         | -- | -- |
| <i>Tersina viridis</i>          | Pair        | Pair        | Neotropical | [943, 951] | -- | -- |
| <i>Catamblyrhynchus diadema</i> | Unknown     | Pair        | Neotropical | [370]      | -- | -- |
| <i>Oreothraupis arremonops</i>  | Unknown     | Pair        | Neotropical | [380]      | -- | -- |
| <i>Urothraupis stolzmanni</i>   | Unknown     | Pair        | Neotropical | [370]      | -- | -- |
| <i>Nephelornis oneilli</i>      | Unknown     | Pair        | Neotropical | [943]      | -- | -- |
| <i>Charitospiza eucosma</i>     | Unknown     | Pair        | Neotropical | [481]      | -- | -- |
| <i>Coryphasiza melanotis</i>    | Unknown     | Pair        | Neotropical | [445]      | -- | -- |
| <i>Saltatricula multicolor</i>  | Unknown     | Pair        | Neotropical | [481]      | -- | -- |
| <i>Coryphospingus pileatus</i>  | Unknown     | Pair        | Neotropical | [79]       | -- | -- |
| <i>C. cucullatus</i>            | Unknown     | Pair        | Neotropical | [481]      | -- | -- |
| <i>Rhodospingus cruentus</i>    | Pair        | Pair        | Neotropical | [417]      | -- | -- |
| <i>Phrygilus atriceps</i>       | Unknown     | Pair        | Neotropical | [384]      | -- | -- |
| <i>P. punensis</i>              | Unknown     | Pair        | Neotropical | --         | -- | -- |
| <i>P. gayi</i>                  | Unknown     | Pair        | Neotropical | [384, 951] | -- | -- |
| <i>P. patagonicus</i>           | Unknown     | Pair        | Neotropical | --         | -- | -- |

|                              |         |      |             |            |    |    |
|------------------------------|---------|------|-------------|------------|----|----|
| <i>P. fruticeti</i>          | Unknown | Pair | Neotropical | [384]      | -- | -- |
| <i>P. unicolor</i>           | Unknown | Pair | Neotropical | [370, 384] | -- | -- |
| <i>P. dorsalis</i>           | Unknown | Pair | Neotropical | [384]      | -- | -- |
| <i>P. erythronotus</i>       | Unknown | Pair | Neotropical | --         | -- | -- |
| <i>P. plebejus</i>           | Unknown | Pair | Neotropical | --         | -- | -- |
| <i>P. carbonarius</i>        | Unknown | Pair | Neotropical | [384, 951] | -- | -- |
| <i>P. alaudinus</i>          | Unknown | Pair | Neotropical | [481]      | -- | -- |
| <i>Melanodera melanodera</i> | Pair    | Pair | Neotropical | [384]      | -- | -- |
| <i>M. xanthogramma</i>       | Unknown | Pair | Neotropical | [384, 951] | -- | -- |
| <i>Haplospiza rustica</i>    | Unknown | Pair | Neotropical | [480]      | -- | -- |
| <i>H. unicolor</i>           | Unknown | Pair | Neotropical | [478]      | -- | -- |
| <i>Acanthidops bairdii</i>   | Unknown | Pair | Neotropical | [480]      | -- | -- |
| <i>Lophospingus pusillus</i> | Unknown | Pair | Neotropical | [481]      | -- | -- |
| <i>L. griseocristatus</i>    | Unknown | Pair | Neotropical | [384]      | -- | -- |
| <i>Donacospiza albifrons</i> | Unknown | Pair | Neotropical | [481]      | -- | -- |
| <i>Rowettia goughensis</i>   | Pair    | Pair | Neotropical | [445]      | -- | -- |
| <i>Nesospiza acunhae</i>     | Pair    | Pair | Neotropical | --         | -- | -- |
| <i>N. wilkinsi</i>           | Pair    | Pair | Neotropical | --         | -- | -- |
| <i>Diuca specularifera</i>   | Unknown | Pair | Neotropical | [384]      | -- | -- |
| <i>D. diuca</i>              | Pair    | Pair | Neotropical | [384, 951] | -- | -- |
| <i>Idiopsar brachyurus</i>   | Unknown | Pair | Neotropical | [384]      | -- | -- |
| <i>Piezorhina cinerea</i>    | Unknown | Pair | Neotropical | [481]      | -- | -- |
| <i>Xenospingus concolor</i>  | Unknown | Pair | Neotropical | [380]      | -- | -- |
| <i>Incaspiza pulchra</i>     | Unknown | Pair | Neotropical | [384]      | -- | -- |
| <i>I. personata</i>          | Unknown | Pair | Neotropical | --         | -- | -- |
| <i>I. ortizi</i>             | Unknown | Pair | Neotropical | [380]      | -- | -- |
| <i>I. laeta</i>              | Unknown | Pair | Neotropical | [481]      | -- | -- |
| <i>I. watkinsi</i>           | Unknown | Pair | Neotropical | --         | -- | -- |
| <i>Poospiza thoracica</i>    | Unknown | Pair | Neotropical | --         | -- | -- |
| <i>P. boliviana</i>          | Unknown | Pair | Neotropical | [384]      | -- | -- |
| <i>P. alticola</i>           | Unknown | Pair | Neotropical | [380]      | -- | -- |
| <i>P. hypochondria</i>       | Unknown | Pair | Neotropical | [384]      | -- | -- |
| <i>P. ornata</i>             | Unknown | Pair | Neotropical | [481]      | -- | -- |
| <i>P. erythrophrys</i>       | Pair    | Pair | Neotropical | [384]      | -- | -- |
| <i>P. whitii</i>             | Unknown | Pair | Neotropical | [481]      | -- | -- |
| <i>P. nigrorufa</i>          | Unknown | Pair | Neotropical | [384]      | -- | -- |
| <i>P. lateralis</i>          | Unknown | Pair | Neotropical | [481]      | -- | -- |
| <i>P. rubecula</i>           | Unknown | Pair | Neotropical | [380]      | -- | -- |
| <i>P. garleppi</i>           | Unknown | Pair | Neotropical | --         | -- | -- |
| <i>P. baeri</i>              | Unknown | Pair | Neotropical | [380, 964] | -- | -- |
| <i>P. caesar</i>             | Unknown | Pair | Neotropical | [384]      | -- | -- |
| <i>P. hispaniolensis</i>     | Pair    | Pair | Neotropical | [417]      | -- | -- |
| <i>P. torquata</i>           | Unknown | Pair | Neotropical | [384, 951] | -- | -- |

|                               |             |             |             |            |    |    |
|-------------------------------|-------------|-------------|-------------|------------|----|----|
| <i>P. melanoleuca</i>         | Unknown     | Pair        | Neotropical | [481]      | -- | -- |
| <i>P. cinerea</i>             | Unknown     | Pair        | Neotropical | [380]      | -- | -- |
| <i>Sicalis citrina</i>        | Pair        | Pair        | Neotropical | [79]       | -- | -- |
| <i>S. lutea</i>               | Unknown     | Pair        | Neotropical | [384]      | -- | -- |
| <i>S. uropygialis</i>         | Unknown     | Pair        | Neotropical | --         | -- | -- |
| <i>S. luteocephala</i>        | Unknown     | Pair        | Neotropical | --         | -- | -- |
| <i>S. auriventris</i>         | Unknown     | Pair        | Neotropical | [384, 951] | -- | -- |
| <i>S. olivascens</i>          | Unknown     | Pair        | Neotropical | --         | -- | -- |
| <i>S. lebruni</i>             | Unknown     | Pair        | Neotropical | [384]      | -- | -- |
| <i>S. columbiana</i>          | Pair        | Pair        | Neotropical | [79]       | -- | -- |
| <i>S. flaveola</i>            | Pair        | Pair        | Neotropical | --         | -- | -- |
| <i>S. luteola</i>             | Unknown     | Pair        | Neotropical | [480]      | -- | -- |
| <i>S. luteiventris</i>        | Subspp      | Subspp      | Neotropical | [481]      | -- | -- |
| <i>S. raimondii</i>           | Subspp      | Subspp      | Neotropical | --         | -- | -- |
| <i>S. taczanowskii</i>        | Unknown     | Pair        | Neotropical | --         | -- | -- |
| <i>Emberizoides herbicola</i> | Pair        | Pair        | Neotropical | [79, 480]  | -- | -- |
| <i>E. duidae</i>              | Unknown     | Pair        | Neotropical | [79]       | -- | -- |
| <i>E. ypiranganus</i>         | Unknown     | Pair        | Neotropical | [965]      | -- | -- |
| <i>Embernagra platensis</i>   | Unknown     | Pair        | Neotropical | [384]      | -- | -- |
| <i>E. longicauda</i>          | Unknown     | Pair        | Neotropical | [481]      | -- | -- |
| <i>Volatinia jacarina</i>     | Pair        | Pair        | Neotropical | [951, 966] | -- | -- |
| <i>Sporophila frontalis</i>   | Unknown     | Pair        | Neotropical | [380]      | -- | -- |
| <i>S. falcirostris</i>        | Unknown     | Pair        | Neotropical | --         | -- | -- |
| <i>S. schistacea</i>          | Female only | Female only | Neotropical | [79]       | -- | -- |
| <i>S. intermedia</i>          | Unknown     | Pair        | Neotropical | --         | -- | -- |
| <i>S. plumbea</i>             | Unknown     | Pair        | Neotropical | --         | -- | -- |
| <i>S. americana</i>           | Pair        | Pair        | Neotropical | [480]      | -- | -- |
| <i>S. torqueola</i>           | Pair        | Pair        | Neotropical | [967]      | -- | -- |
| <i>S. collaris</i>            | Unknown     | Pair        | Neotropical | [481]      | -- | -- |
| <i>S. bouvronides</i>         | Pair        | Pair        | Neotropical | [79]       | -- | -- |
| <i>S. lineola</i>             | Unknown     | Pair        | Neotropical | --         | -- | -- |
| <i>S. luctuosa</i>            | Pair        | Pair        | Neotropical | --         | -- | -- |
| <i>S. nigricollis</i>         | Pair        | Pair        | Neotropical | [480]      | -- | -- |
| <i>S. ardesiaca</i>           | Unknown     | Pair        | Neotropical | [481]      | -- | -- |
| <i>S. melanops</i>            | Unknown     | Pair        | Neotropical | [380]      | -- | -- |
| <i>S. caerulescens</i>        | Unknown     | Pair        | Neotropical | [370, 951] | -- | -- |
| <i>S. albogularis</i>         | Unknown     | Pair        | Neotropical | [481]      | -- | -- |
| <i>S. leucoptera</i>          | Unknown     | Pair        | Neotropical | --         | -- | -- |
| <i>S. peruviana</i>           | Unknown     | Pair        | Neotropical | --         | -- | -- |
| <i>S. simplex</i>             | Unknown     | Pair        | Neotropical | --         | -- | -- |
| <i>S. nigrorufa</i>           | Unknown     | Pair        | Neotropical | [380]      | -- | -- |
| <i>S. bouvreuil</i>           | Unknown     | Pair        | Neotropical | [481]      | -- | -- |
| <i>S. minuta</i>              | Unknown     | Pair        | Neotropical | [480]      | -- | -- |

|                                  |         |      |             |                 |    |    |
|----------------------------------|---------|------|-------------|-----------------|----|----|
| <i>S. hypoxantha</i>             | Unknown | Pair | Neotropical | [481, 951]      | -- | -- |
| <i>S. ruficollis</i>             | Unknown | Pair | Neotropical | --              | -- | -- |
| <i>S. palustris</i>              | Unknown | Pair | Neotropical | [380]           | -- | -- |
| <i>S. castaneiventris</i>        | Pair    | Pair | Neotropical | [79]            | -- | -- |
| <i>S. hypochroma</i>             | Unknown | Pair | Neotropical | [380]           | -- | -- |
| <i>S. cinnamomea</i>             | Unknown | Pair | Neotropical | [445, 951]      | -- | -- |
| <i>S. zelichi</i>                | Unknown | Pair | Neotropical | [380, 445, 951] | -- | -- |
| <i>S. melanogaster</i>           | Unknown | Pair | Neotropical | [481]           | -- | -- |
| <i>S. telasco</i>                | Unknown | Pair | Neotropical | [370]           | -- | -- |
| <i>S. insulata</i>               | Unknown | Pair | Neotropical | [380]           | -- | -- |
| <i>Oryzoborus nuttingi</i>       | Pair    | Pair | Neotropical | [480]           | -- | -- |
| <i>O. crassirostris</i>          | Unknown | Pair | Neotropical | [79]            | -- | -- |
| <i>O. atrirostris</i>            | Unknown | Pair | Neotropical | [481]           | -- | -- |
| <i>O. maximiliani</i>            | Unknown | Pair | Neotropical | [79]            | -- | -- |
| <i>O. angolensis</i>             | Pair    | Pair | Neotropical | [480]           | -- | -- |
| <i>Amaurospiza concolor</i>      | Unknown | Pair | Neotropical | --              | -- | -- |
| <i>A. moesta</i>                 | Unknown | Pair | Neotropical | [481]           | -- | -- |
| <i>Melopyrrha nigra</i>          | Unknown | Pair | Neotropical | [491]           | -- | -- |
| <i>Dolospingus fringilloides</i> | Unknown | Pair | Neotropical | [968]           | -- | -- |
| <i>Catamenia analis</i>          | Unknown | Pair | Neotropical | [370, 951]      | -- | -- |
| <i>C. inornata</i>               | Pair    | Pair | Neotropical | [79]            | -- | -- |
| <i>C. homochroa</i>              | Unknown | Pair | Neotropical | --              | -- | -- |
| <i>Tiaris obscura</i>            | Unknown | Pair | Neotropical | --              | -- | -- |
| <i>T. canora</i>                 | Pair    | Pair | Neotropical | [491]           | -- | -- |
| <i>T. olivacea</i>               | Pair    | Pair | Neotropical | [480]           | -- | -- |
| <i>T. bicolor</i>                | Unknown | Pair | Neotropical | [79]            | -- | -- |
| <i>T. fuliginosa</i>             | Unknown | Pair | Neotropical | --              | -- | -- |
| <i>Loxipasser anoxanthus</i>     | Pair    | Pair | Neotropical | [491]           | -- | -- |
| <i>Loxigilla portoricensis</i>   | Unknown | Pair | Neotropical | [491, 969]      | -- | -- |
| <i>L. violacea</i>               | Unknown | Pair | Neotropical | [491]           | -- | -- |
| <i>L. noctis</i>                 | Unknown | Pair | Neotropical | --              | -- | -- |
| <i>Diglossa baritula</i>         | Pair    | Pair | Neotropical | [943]           | -- | -- |
| <i>D. plumbea</i>                | Pair    | Pair | Neotropical | --              | -- | -- |
| <i>D. sittoides</i>              | Unknown | Pair | Neotropical | --              | -- | -- |
| <i>D. venezuelensis</i>          | Unknown | Pair | Neotropical | [380]           | -- | -- |
| <i>D. albilatera</i>             | Unknown | Pair | Neotropical | [943]           | -- | -- |
| <i>D. gloriosissima</i>          | Unknown | Pair | Neotropical | [445]           | -- | -- |
| <i>D. lafresnayii</i>            | Unknown | Pair | Neotropical | [943]           | -- | -- |
| <i>D. mystacalis</i>             | Unknown | Pair | Neotropical | --              | -- | -- |
| <i>D. gloriosa</i>               | Unknown | Pair | Neotropical | --              | -- | -- |
| <i>D. humeralis</i>              | Pair    | Pair | Neotropical | --              | -- | -- |
| <i>D. brunneiventris</i>         | Unknown | Pair | Neotropical | --              | -- | -- |
| <i>D. carbonaria</i>             | Unknown | Pair | Neotropical | --              | -- | -- |

|                                   |             |             |             |            |    |    |
|-----------------------------------|-------------|-------------|-------------|------------|----|----|
| <i>D. duidae</i>                  | Unknown     | Pair        | Neotropical | --         | -- | -- |
| <i>D. major</i>                   | Unknown     | Pair        | Neotropical | --         | -- | -- |
| <i>Diglossopis indigotica</i>     | Unknown     | Pair        | Neotropical | --         | -- | -- |
| <i>D. glauca</i>                  | Unknown     | Pair        | Neotropical | --         | -- | -- |
| <i>D. caerulescens</i>            | Unknown     | Pair        | Neotropical | --         | -- | -- |
| <i>D. cyanea</i>                  | Unknown     | Pair        | Neotropical | --         | -- | -- |
| <i>Euneornis campestris</i>       | Unknown     | Pair        | Neotropical | --         | -- | -- |
| <i>Melanospiza richardsoni</i>    | Pair        | Pair        | Neotropical | [970]      | -- | -- |
| <i>Geospiza magnirostris</i>      | Pair        | Pair        | Neotropical | [971]      | -- | -- |
| <i>G. fortis</i>                  | Cooperation | Cooperation | Neotropical | [972]      | -- | -- |
| <i>G. fuliginosa</i>              | Pair        | Pair        | Neotropical | [973]      | -- | -- |
| <i>G. difficilis</i>              | Pair        | Pair        | Neotropical | [971]      | -- | -- |
| <i>G. scandens</i>                | Cooperation | Cooperation | Neotropical | [972]      | -- | -- |
| <i>G. conirostris</i>             | Pair        | Pair        | Neotropical | [973]      | -- | -- |
| <i>Camarhynchus crassirostris</i> | Pair        | Pair        | Neotropical | [974]      | -- | -- |
| <i>C. psittacula</i>              | Pair        | Pair        | Neotropical | --         | -- | -- |
| <i>C. pauper</i>                  | Pair        | Pair        | Neotropical | --         | -- | -- |
| <i>C. parvulus</i>                | Pair        | Pair        | Neotropical | --         | -- | -- |
| <i>C. pallidus</i>                | Pair        | Pair        | Neotropical | --         | -- | -- |
| <i>C. heliobates</i>              | Pair        | Pair        | Neotropical | --         | -- | -- |
| <i>Certhidea olivacea</i>         | Pair        | Pair        | Neotropical | [971]      | -- | -- |
| <i>Pinaroloxias inornata</i>      | Pair        | Pair        | Neotropical | [480]      | -- | -- |
| <i>Spiza americana</i>            | Female only | Female only | Nearctic    | [975]      | -- | -- |
| <i>Pheucticus chrysopeplus</i>    | Unknown     | Pair        | Neotropical | [370]      | -- | -- |
| <i>P. chrysogaster</i>            | Unknown     | Pair        | Neotropical | [79]       | -- | -- |
| <i>P. tibialis</i>                | Pair        | Pair        | Neotropical | [480]      | -- | -- |
| <i>P. aureoventris</i>            | Pair        | Pair        | Neotropical | [481, 951] | -- | -- |
| <i>P. ludovicianus</i>            | Pair        | Pair        | Nearctic    | [976]      | -- | -- |
| <i>P. melanocephalus</i>          | Pair        | Pair        | Nearctic    | [977]      | -- | -- |
| <i>Cardinalis cardinalis</i>      | Occasional  | Pair        | Nearctic    | [978]      | -- | -- |
| <i>C. phoeniceus</i>              | Unknown     | Pair        | Neotropical | [370]      | -- | -- |
| <i>C. sinuatus</i>                | Pair        | Pair        | Neotropical | [979]      | -- | -- |
| <i>Caryothraustes poliogaster</i> | Cooperation | Cooperation | Neotropical | [980, 981] | -- | -- |
| <i>C. canadensis</i>              | Unknown     | Pair        | Neotropical | [982]      | -- | -- |
| <i>C. humeralis</i>               | Unknown     | Pair        | Neotropical | [370]      | -- | -- |
| <i>Rhodothraupis celaeno</i>      | Unknown     | Pair        | Neotropical | [478]      | -- | -- |
| <i>Periporphyrus erythromelas</i> | Unknown     | Pair        | Neotropical | [79]       | -- | -- |
| <i>Pitylus grossus</i>            | Pair        | Pair        | Neotropical | --         | -- | -- |
| <i>P. fuliginosus</i>             | Unknown     | Pair        | Neotropical | [481]      | -- | -- |
| <i>Saltator atriceps</i>          | Unknown     | Pair        | Neotropical | [478]      | -- | -- |
| <i>S. maximus</i>                 | Pair        | Pair        | Neotropical | [79, 931]  | -- | -- |
| <i>S. atripennis</i>              | Unknown     | Pair        | Neotropical | [370]      | -- | -- |
| <i>S. coerulescens</i>            | Cooperation | Cooperation | Neotropical | [79]       | -- | -- |



|                                   |             |             |             |       |                          |       |
|-----------------------------------|-------------|-------------|-------------|-------|--------------------------|-------|
| <i>S. similis</i>                 | Unknown     | Cooperation | Neotropical | [481] | --                       | --    |
| <i>S. orenocensis</i>             | Suspected   | Cooperation | Neotropical | [370] | --                       | --    |
| <i>S. nigriceps</i>               | Unknown     | Cooperation | Neotropical | [481] | --                       | --    |
| <i>S. aurantiirostris</i>         | Unknown     | Cooperation | Neotropical | [384] | --                       | --    |
| <i>S. maxilloso</i>               | Unknown     | Cooperation | Neotropical | [481] | --                       | --    |
| <i>S. cinctus</i>                 | Unknown     | Cooperation | Neotropical | [983] | --                       | --    |
| <i>S. atricollis</i>              | Cooperation | Cooperation | Neotropical | [984] | --                       | --    |
| <i>S. rufiventris</i>             | Unknown     | Pair        | Neotropical | [380] | --                       | --    |
| <i>S. albicollis</i>              | Pair        | Pair        | Neotropical | [931] | --                       | --    |
| <i>Cyanoloxia glaucocaerulea</i>  | Unknown     | Pair        | Neotropical | [481] | --                       | --    |
| <i>Cyanocompsa cyanoides</i>      | Pair        | Pair        | Neotropical | [480] | --                       | --    |
| <i>C. parellina</i>               | Unknown     | Pair        | Neotropical | [478] | --                       | --    |
| <i>C. brissonii</i>               | Unknown     | Pair        | Neotropical | [79]  | --                       | --    |
| <i>Guiraca caerulea</i>           | Pair        | Pair        | Neotropical | [985] | --                       | --    |
| <i>Passerina amoena</i>           | Pair        | Pair        | Nearctic    | [986] | --                       | --    |
| <i>P. cyanea</i>                  | Pair        | Pair        | Nearctic    | [987] | --                       | --    |
| <i>P. versicolor</i>              | Pair        | Pair        | Nearctic    | [988] | --                       | --    |
| <i>P. ciris</i>                   | Pair        | Pair        | Nearctic    | [989] | --                       | --    |
| <i>P. rositae</i>                 | Unknown     | Pair        | Neotropical | [478] | --                       | --    |
| <i>P. leclancherii</i>            | Unknown     | Pair        | Neotropical | --    | --                       | --    |
| <i>Porphyrospiza caerulescens</i> | Unknown     | Pair        | Neotropical | [481] | --                       | --    |
| <b>Passeroidea: Parulidae</b>     |             |             |             |       |                          |       |
| <i>Vermivora bachmanii</i>        | Unknown     | Pair        | Nearctic    | [990] | bbbbbbbbbbbbbbbbbbbbbbba | [804] |
| <i>V. pinus</i>                   | Occasional  | Pair        | Nearctic    | [991] | --                       | --    |
| <i>V. chrysoptera</i>             | Pair        | Pair        | Nearctic    | [990] | --                       | --    |
| <i>V. peregrina</i>               | Pair        | Pair        | Nearctic    | --    | --                       | --    |
| <i>V. celata</i>                  | Pair        | Pair        | Nearctic    | --    | --                       | --    |
| <i>V. ruficapilla</i>             | Pair        | Pair        | Nearctic    | --    | --                       | --    |
| <i>V. virginiae</i>               | Pair        | Pair        | Nearctic    | --    | --                       | --    |
| <i>V. crissalis</i>               | Pair        | Pair        | Nearctic    | --    | --                       | --    |
| <i>V. luciae</i>                  | Pair        | Pair        | Nearctic    | --    | --                       | --    |
| <i>Parula americana</i>           | Pair        | Pair        | Nearctic    | --    | --                       | --    |
| <i>P. pitiayumi</i>               | Pair        | Pair        | Neotropical | --    | --                       | --    |
| <i>P. superciliosa</i>            | Unknown     | Pair        | Neotropical | --    | --                       | --    |
| <i>P. gutturalis</i>              | Unknown     | Pair        | Neotropical | --    | --                       | --    |
| <i>Dendroica petechia</i>         | Pair        | Pair        | Nearctic    | --    | --                       | --    |
| <i>D. pensylvanica</i>            | Pair        | Pair        | Nearctic    | --    | --                       | --    |
| <i>D. magnolia</i>                | Pair        | Pair        | Nearctic    | --    | --                       | --    |
| <i>D. tigrina</i>                 | Pair        | Pair        | Nearctic    | --    | --                       | --    |
| <i>D. caerulescens</i>            | Pair        | Pair        | Nearctic    | --    | --                       | --    |
| <i>D. coronata</i>                | Pair        | Pair        | Nearctic    | --    | --                       | --    |
| <i>D. nigrescens</i>              | Pair        | Pair        | Nearctic    | --    | --                       | --    |
| <i>D. townsendi</i>               | Pair        | Pair        | Nearctic    | --    | --                       | --    |

|                                |             |             |             |            |    |    |
|--------------------------------|-------------|-------------|-------------|------------|----|----|
| <i>D. occidentalis</i>         | Pair        | Pair        | Nearctic    | --         | -- | -- |
| <i>D. virens</i>               | Pair        | Pair        | Nearctic    | --         | -- | -- |
| <i>D. chrysoparia</i>          | Pair        | Pair        | Nearctic    | --         | -- | -- |
| <i>D. fusca</i>                | Pair        | Pair        | Nearctic    | --         | -- | -- |
| <i>D. dominica</i>             | Pair        | Pair        | Nearctic    | --         | -- | -- |
| <i>D. graciae</i>              | Pair        | Pair        | Nearctic    | --         | -- | -- |
| <i>D. adelaidae</i>            | Pair        | Pair        | Neotropical | --         | -- | -- |
| <i>D. pityophila</i>           | Pair        | Pair        | Neotropical | --         | -- | -- |
| <i>D. pinus</i>                | Pair        | Pair        | Nearctic    | --         | -- | -- |
| <i>D. kirtlandii</i>           | Pair        | Pair        | Nearctic    | --         | -- | -- |
| <i>D. discolor</i>             | Occasional  | Pair        | Nearctic    | [992]      | -- | -- |
| <i>D. vitellina</i>            | Unknown     | Pair        | Neotropical | [990]      | -- | -- |
| <i>D. palmarum</i>             | Pair        | Pair        | Nearctic    | --         | -- | -- |
| <i>D. castanea</i>             | Pair        | Pair        | Nearctic    | --         | -- | -- |
| <i>D. striata</i>              | Occasional  | Pair        | Nearctic    | [993]      | -- | -- |
| <i>D. cerulea</i>              | Pair        | Pair        | Nearctic    | [990]      | -- | -- |
| <i>D. plumbea</i>              | Unknown     | Pair        | Neotropical | --         | -- | -- |
| <i>D. pharetra</i>             | Unknown     | Pair        | Neotropical | --         | -- | -- |
| <i>D. angelae</i>              | Unknown     | Pair        | Neotropical | --         | -- | -- |
| <i>Catharopeza bishopi</i>     | Unknown     | Pair        | Neotropical | --         | -- | -- |
| <i>Mniotilta varia</i>         | Pair        | Pair        | Nearctic    | --         | -- | -- |
| <i>Setophaga ruticilla</i>     | Pair        | Pair        | Nearctic    | --         | -- | -- |
| <i>Protonotaria citrea</i>     | Pair        | Pair        | Nearctic    | --         | -- | -- |
| <i>Helmitheros vermivorus</i>  | Pair        | Pair        | Nearctic    | --         | -- | -- |
| <i>Limnothlypis swainsonii</i> | Pair        | Pair        | Nearctic    | --         | -- | -- |
| <i>Seiurus aurocapillus</i>    | Cooperation | Cooperation | Nearctic    | [994]      | -- | -- |
| <i>S. noveboracensis</i>       | Pair        | Pair        | Nearctic    | [990]      | -- | -- |
| <i>S. motacilla</i>            | Pair        | Pair        | Nearctic    | --         | -- | -- |
| <i>Oporornis formosus</i>      | Pair        | Pair        | Nearctic    | --         | -- | -- |
| <i>O. agilis</i>               | Pair        | Pair        | Nearctic    | --         | -- | -- |
| <i>O. philadelphia</i>         | Pair        | Pair        | Nearctic    | --         | -- | -- |
| <i>O. tolmiei</i>              | Pair        | Pair        | Nearctic    | --         | -- | -- |
| <i>Geothlypis trichas</i>      | Pair        | Pair        | Nearctic    | --         | -- | -- |
| <i>G. beldingi</i>             | Unknown     | Pair        | Neotropical | --         | -- | -- |
| <i>G. flavovelata</i>          | Unknown     | Pair        | Neotropical | --         | -- | -- |
| <i>G. rostrata</i>             | Unknown     | Pair        | Neotropical | --         | -- | -- |
| <i>G. semiflava</i>            | Unknown     | Pair        | Neotropical | --         | -- | -- |
| <i>G. speciosa</i>             | Unknown     | Pair        | Neotropical | --         | -- | -- |
| <i>G. nelsoni</i>              | Unknown     | Pair        | Neotropical | --         | -- | -- |
| <i>G. aequinoctialis</i>       | Unknown     | Pair        | Neotropical | [951, 990] | -- | -- |
| <i>G. poliocephala</i>         | Unknown     | Pair        | Neotropical | [990]      | -- | -- |
| <i>Microligea palustris</i>    | Unknown     | Pair        | Neotropical | --         | -- | -- |
| <i>Teretistris fernandinae</i> | Unknown     | Pair        | Neotropical | --         | -- | -- |

|                              |            |      |             |       |    |    |
|------------------------------|------------|------|-------------|-------|----|----|
| <i>T. fornsi</i>             | Unknown    | Pair | Neotropical | [445] | -- | -- |
| <i>Leucopeza semperi</i>     | Occasional | Pair | Neotropical | [995] | -- | -- |
| <i>Wilsonia citrina</i>      | Pair       | Pair | Neotropical | [990] | -- | -- |
| <i>W. pusilla</i>            | Pair       | Pair | Neotropical | --    | -- | -- |
| <i>W. canadensis</i>         | Occasional | Pair | Neotropical | [996] | -- | -- |
| <i>Cardellina rubrifrons</i> | Unknown    | Pair | Neotropical | [990] | -- | -- |
| <i>Ergaticus ruber</i>       | Pair       | Pair | Neotropical | [445] | -- | -- |
| <i>E. versicolor</i>         | Pair       | Pair | Neotropical | [990] | -- | -- |
| <i>Myioborus pictus</i>      | Pair       | Pair | Neotropical | --    | -- | -- |
| <i>M. miniatus</i>           | Pair       | Pair | Neotropical | [997] | -- | -- |
| <i>M. castaneocapillus</i>   | Unknown    | Pair | Neotropical | [990] | -- | -- |
| <i>M. brunneiceps</i>        | Unknown    | Pair | Neotropical | [445] | -- | -- |
| <i>M. pariae</i>             | Unknown    | Pair | Neotropical | [990] | -- | -- |
| <i>M. albifacies</i>         | Unknown    | Pair | Neotropical | --    | -- | -- |
| <i>M. cardonai</i>           | Unknown    | Pair | Neotropical | --    | -- | -- |
| <i>M. torquatus</i>          | Unknown    | Pair | Neotropical | --    | -- | -- |
| <i>M. melanocephalus</i>     | Unknown    | Pair | Neotropical | --    | -- | -- |
| <i>M. ornatus</i>            | Unknown    | Pair | Neotropical | --    | -- | -- |
| <i>M. albifrons</i>          | Unknown    | Pair | Neotropical | --    | -- | -- |
| <i>M. flavivertex</i>        | Unknown    | Pair | Neotropical | --    | -- | -- |
| <i>Euthlypis lachrymosa</i>  | Unknown    | Pair | Neotropical | --    | -- | -- |
| <i>Basileuterus fraseri</i>  | Unknown    | Pair | Neotropical | --    | -- | -- |
| <i>B. bivittatus</i>         | Unknown    | Pair | Neotropical | --    | -- | -- |
| <i>B. chrysogaster</i>       | Unknown    | Pair | Neotropical | --    | -- | -- |
| <i>B. signatus</i>           | Unknown    | Pair | Neotropical | --    | -- | -- |
| <i>B. luteoviridis</i>       | Unknown    | Pair | Neotropical | --    | -- | -- |
| <i>B. nigrocristatus</i>     | Unknown    | Pair | Neotropical | [445] | -- | -- |
| <i>B. griseiceps</i>         | Unknown    | Pair | Neotropical | [990] | -- | -- |
| <i>B. basilicus</i>          | Unknown    | Pair | Neotropical | --    | -- | -- |
| <i>B. cinereicollis</i>      | Unknown    | Pair | Neotropical | --    | -- | -- |
| <i>B. conspicillatus</i>     | Unknown    | Pair | Neotropical | --    | -- | -- |
| <i>B. coronatus</i>          | Unknown    | Pair | Neotropical | --    | -- | -- |
| <i>B. culcivorus</i>         | Unknown    | Pair | Neotropical | --    | -- | -- |
| <i>B. trifasciatus</i>       | Unknown    | Pair | Neotropical | --    | -- | -- |
| <i>B. hypoleucus</i>         | Unknown    | Pair | Neotropical | --    | -- | -- |
| <i>B. rufifrons</i>          | Unknown    | Pair | Neotropical | --    | -- | -- |
| <i>B. belli</i>              | Unknown    | Pair | Neotropical | --    | -- | -- |
| <i>B. melanogenys</i>        | Unknown    | Pair | Neotropical | [445] | -- | -- |
| <i>B. ignotus</i>            | Unknown    | Pair | Neotropical | [990] | -- | -- |
| <i>B. tristriatus</i>        | Unknown    | Pair | Neotropical | --    | -- | -- |
| <i>B. leucoblepharus</i>     | Unknown    | Pair | Neotropical | --    | -- | -- |
| <i>B. leucophrys</i>         | Unknown    | Pair | Neotropical | --    | -- | -- |
| <i>B. flaveolus</i>          | Pair       | Pair | Neotropical | --    | -- | -- |

|                                 |             |             |             |       |           |       |     |        |
|---------------------------------|-------------|-------------|-------------|-------|-----------|-------|-----|--------|
| <i>B. fulvicauda</i>            | Unknown     | Pair        | Neotropical | --    | --        | --    |     |        |
| <i>B. rivularis</i>             | Pair        | Pair        | Neotropical | --    | --        | --    |     |        |
| <i>Zeledonia coronata</i>       | Pair        | Pair        | Neotropical | --    | --        | --    |     |        |
| <i>Icteria virens</i>           | Unknown     | Pair        | Neotropical | --    | --        | --    |     |        |
| <i>Granatellus venustus</i>     | Unknown     | Pair        | Neotropical | --    | --        | --    |     |        |
| <i>G. sallaei</i>               | Unknown     | Pair        | Neotropical | --    | --        | --    |     |        |
| <i>G. pelzelni</i>              | Unknown     | Pair        | Neotropical | [445] | --        | --    |     |        |
| <i>Xenoligea montana</i>        | Unknown     | Pair        | Neotropical | [990] | --        | --    |     |        |
| <b>Passeroidea: Icteridae</b>   |             |             |             |       |           |       |     |        |
| <i>Amblycercus holosericeus</i> | Unknown     | Pair        | Neotropical | [998] | bbdbbbbbb | [804] | a   | [999]  |
| <i>Ocyalus oseryi</i>           | Pair        | Pair        | Neotropical | --    | --        | --    | ba  | [1000] |
| <i>O. latirostris</i>           | Unknown     | Female only | Neotropical | --    | --        | --    | --  | --     |
| <i>Psarocolius decumanus</i>    | Unknown     | Female only | Neotropical | --    | --        | --    | --  | --     |
| <i>P. viridis</i>               | Female only | Female only | Neotropical | --    | --        | --    | --  | --     |
| <i>P. atrovirens</i>            | Unknown     | Female only | Neotropical | --    | --        | --    | --  | --     |
| <i>P. angustifrons</i>          | Female only | Female only | Neotropical | --    | --        | --    | --  | --     |
| <i>P. wagleri</i>               | Female only | Female only | Neotropical | --    | --        | --    | --  | --     |
| <i>P. montezuma</i>             | Female only | Female only | Neotropical | --    | --        | --    | --  | --     |
| <i>P. cassini</i>               | Unknown     | Female only | Neotropical | --    | --        | --    | --  | --     |
| <i>P. bifasciatus</i>           | Unknown     | Female only | Neotropical | --    | --        | --    | --  | --     |
| <i>P. guatimozinus</i>          | Unknown     | Female only | Neotropical | --    | --        | --    | --  | --     |
| <i>Cacicus cela</i>             | Female only | Female only | Neotropical | --    | --        | --    | --  | [999]  |
| <i>C. haemorrhous</i>           | Female only | Female only | Neotropical | --    | --        | --    | --  | --     |
| <i>C. uropygialis</i>           | Pair        | Pair        | Neotropical | --    | --        | --    | --  | --     |
| <i>C. koepckeae</i>             | Unknown     | Pair        | Neotropical | --    | --        | --    | --  | --     |
| <i>C. chrysopterus</i>          | Unknown     | Pair        | Neotropical | --    | --        | --    | --  | --     |
| <i>C. chrysonotus</i>           | Unknown     | Pair        | Neotropical | --    | --        | --    | --  | --     |
| <i>C. sclateri</i>              | Unknown     | Pair        | Neotropical | --    | --        | --    | --  | --     |
| <i>C. solitarius</i>            | Unknown     | Pair        | Neotropical | --    | --        | --    | --  | --     |
| <i>C. melanicterus</i>          | Unknown     | Pair        | Neotropical | --    | --        | --    | --  | --     |
| <i>Icterus chryscephalus</i>    | Pair        | Pair        | Neotropical | --    | --        | --    | bba | --     |
| <i>I. cayanensis</i>            | Pair        | Pair        | Neotropical | --    | --        | --    | --  | --     |
| <i>I. chrysater</i>             | Unknown     | Pair        | Neotropical | --    | --        | --    | --  | --     |
| <i>I. nigrogularis</i>          | Pair        | Pair        | Neotropical | --    | --        | --    | --  | --     |
| <i>I. leucopteryx</i>           | Pair        | Pair        | Neotropical | --    | --        | --    | --  | --     |
| <i>I. auratus</i>               | Unknown     | Pair        | Neotropical | --    | --        | --    | --  | --     |
| <i>I. mesomelas</i>             | Pair        | Pair        | Neotropical | --    | --        | --    | --  | --     |
| <i>I. auricapillus</i>          | Unknown     | Pair        | Neotropical | --    | --        | --    | --  | --     |
| <i>I. graceannae</i>            | Unknown     | Pair        | Neotropical | --    | --        | --    | --  | --     |
| <i>I. pectoralis</i>            | Pair        | Pair        | Neotropical | --    | --        | --    | --  | --     |
| <i>I. gularis</i>               | Pair        | Pair        | Neotropical | --    | --        | --    | --  | --     |
| <i>I. pustulatus</i>            | Pair        | Pair        | Neotropical | --    | --        | --    | --  | --     |
| <i>I. cucullatus</i>            | Pair        | Pair        | Neotropical | --    | --        | --    | --  | --     |

|                                      |             |             |             |              |    |    |                 |              |
|--------------------------------------|-------------|-------------|-------------|--------------|----|----|-----------------|--------------|
| <i>I. icterus</i>                    | Pair        | Pair        | Neotropical | --           | -- | -- | --              | --           |
| <i>I. jamacaii</i>                   | Unknown     | Pair        | Neotropical | --           | -- | -- | --              | --           |
| <i>I. galbula</i>                    | Suspected   | Cooperation | Nearctic    | [1001, 1002] | -- | -- | --              | --           |
| <i>I. spurius</i>                    | Occasional  | Pair        | Nearctic    | [1003]       | -- | -- | --              | --           |
| <i>I. wagleri</i>                    | Unknown     | Pair        | Neotropical | [998]        | -- | -- | --              | --           |
| <i>I. dominicensis</i>               | Pair        | Pair        | Neotropical | --           | -- | -- | --              | --           |
| <i>I. oberi</i>                      | Pair        | Pair        | Neotropical | --           | -- | -- | --              | --           |
| <i>I. bonana</i>                     | Unknown     | Pair        | Neotropical | --           | -- | -- | --              | --           |
| <i>I. laudabilis</i>                 | Unknown     | Pair        | Neotropical | --           | -- | -- | --              | --           |
| <i>I. graduacauda</i>                | Pair        | Pair        | Neotropical | [1004]       | -- | -- | --              | --           |
| <i>I. maculialatus</i>               | Unknown     | Pair        | Neotropical | [998]        | -- | -- | --              | --           |
| <i>I. parisorum</i>                  | Pair        | Pair        | Nearctic    | --           | -- | -- | --              | --           |
| <i>Dolichonyx oryzivorus</i>         | Cooperation | Cooperation | Neotropical | [1005]       | -- | -- | bbba            | --           |
| <i>Leistes militaris</i>             | Unknown     | Pair        | Neotropical | [998]        | -- | -- | --              | --           |
| <i>L. superciliaris</i>              | Unknown     | Pair        | Neotropical | --           | -- | -- | --              | --           |
| <i>Sturnella bellicosa</i>           | Unknown     | Pair        | Neotropical | --           | -- | -- | --              | --           |
| <i>S. militaris</i>                  | Pair        | Pair        | Neotropical | --           | -- | -- | --              | --           |
| <i>S. loyca</i>                      | Pair        | Pair        | Neotropical | --           | -- | -- | --              | --           |
| <i>S. magna</i>                      | Pair        | Pair        | Nearctic    | --           | -- | -- | --              | --           |
| <i>S. lillianae</i>                  | Unknown     | Pair        | Nearctic    | --           | -- | -- | --              | --           |
| <i>S. neglecta</i>                   | Pair        | Pair        | Nearctic    | --           | -- | -- | --              | --           |
| <i>Xanthocephalus xanthocephalus</i> | Pair        | Pair        | Nearctic    | --           | -- | -- | --              | --           |
| <i>Nesopsar nigerrimus</i>           | Pair        | Pair        | Neotropical | --           | -- | -- | bbbba           | --           |
| <i>Dives atrovioleacea</i>           | Unknown     | Pair        | Neotropical | --           | -- | -- | bbbbb           | --           |
| <i>D. dives</i>                      | Pair        | Pair        | Neotropical | --           | -- | -- | --              | --           |
| <i>D. warszewiczi</i>                | Unknown     | Pair        | Neotropical | --           | -- | -- | --              | --           |
| <i>Macroagelaius imthurni</i>        | Cooperation | Cooperation | Neotropical | --           | -- | -- | bbbbbaaa        | [1006, 1007] |
| <i>M. subalaris</i>                  | Suspected   | Cooperation | Neotropical | [998, 1008]  | -- | -- | bbbbbaab        | --           |
| <i>Gymnomystax mexicanus</i>         | Pair        | Pair        | Neotropical | [998]        | -- | -- | bbbbbbabaaa     | --           |
| <i>Hypopyrrhus pyrohypogaster</i>    | Cooperation | Cooperation | Neotropical | [1007]       | -- | -- | bbbbbbabaab     | --           |
| <i>Lamprosar tanagrinus</i>          | Unknown     | Pair        | Neotropical | [998]        | -- | -- | bbbbbbabab      | --           |
| <i>Xanthopsar flavus</i>             | Pair        | Pair        | Neotropical | [1009]       | -- | -- | bbbbbbabbaaaaa  | --           |
| <i>Pseudoleistes virescens</i>       | Cooperation | Cooperation | Neotropical | [1010]       | -- | -- | bbbbbbabbaaaaba | --           |
| <i>P. guirahuro</i>                  | Cooperation | Cooperation | Neotropical | [1011]       | -- | -- | bbbbbbabbaaaabb | --           |
| <i>Chrysomus icterocephalus</i>      | Pair        | Pair        | Neotropical | [998]        | -- | -- | bbbbbbabbaaaba  | --           |
| <i>Chrysomus ruficapillus</i>        | Female only | Female only | Neotropical | --           | -- | -- | bbbbbbabbaaabb  | --           |
| <i>Agelaioides badius</i>            | Cooperation | Cooperation | Neotropical | [1012, 1013] | -- | -- | bbbbbbabbaaaba  | --           |
| <i>Agelaioides bolivianus</i>        | Cooperation | Cooperation | Neotropical | [1013, 1014] | -- | -- | bbbbbbabbaabb   | --           |
| <i>Agelasticus xanthophthalmus</i>   | Unknown     | Pair        | Neotropical | [998]        | -- | -- | bbbbbbababaa    | --           |
| <i>A. cyanopus</i>                   | Unknown     | Pair        | Neotropical | --           | -- | -- | bbbbbbababab    | --           |
| <i>A. thilius</i>                    | Pair        | Pair        | Neotropical | --           | -- | -- | bbbbbbababb     | --           |
| <i>Ambylramphus holosericeus</i>     | Pair        | Pair        | Neotropical | --           | -- | -- | bbbbbbabbaa     | --           |
| <i>Curaeus curaeus</i>               | Cooperation | Cooperation | Neotropical | [1010]       | -- | -- | bbbbbbabbaba    | --           |

|                                |                |                |             |        |    |    |              |    |
|--------------------------------|----------------|----------------|-------------|--------|----|----|--------------|----|
| <i>C. forbesi</i>              | Cooperation    | Cooperation    | Neotropical | [1015] | -- | -- | bbbbbbabbabb | -- |
| <i>Gnorimopsar chopi</i>       | Unknown        | Cooperation    | Neotropical | [998]  | -- | -- | bbbbbbabbbb  | -- |
| <i>Quiscalus mexicanus</i>     | Female only    | Female only    | Neotropical | --     | -- | -- | bbbbbbba     | -- |
| <i>Q. major</i>                | Female only    | Female only    | Nearctic    | --     | -- | -- | --           | -- |
| <i>Q. nicaraguensis</i>        | Pair           | Pair           | Neotropical | --     | -- | -- | --           | -- |
| <i>Q. quiscula</i>             | Pair           | Pair           | Nearctic    | --     | -- | -- | --           | -- |
| <i>Q. niger</i>                | Pair           | Pair           | Neotropical | --     | -- | -- | --           | -- |
| <i>Q. lugubris</i>             | Pair           | Pair           | Neotropical | --     | -- | -- | --           | -- |
| <i>Euphagus carolinus</i>      | Pair           | Pair           | Nearctic    | --     | -- | -- | --           | -- |
| <i>E. cyanocephalus</i>        | Pair           | Pair           | Nearctic    | --     | -- | -- | --           | -- |
| <i>Agelaius phoeniceus</i>     | Pair           | Pair           | Nearctic    | --     | -- | -- | bbbbbbba     | -- |
| <i>A. tricolor</i>             | Pair           | Pair           | Nearctic    | --     | -- | -- | --           | -- |
| <i>A. humeralis</i>            | Pair           | Pair           | Neotropical | --     | -- | -- | --           | -- |
| <i>A. xanthomus</i>            | Pair           | Pair           | Neotropical | --     | -- | -- | --           | -- |
| <i>Molothrus rufoaxillaris</i> | Brood parasite | Brood parasite | Neotropical | --     | -- | -- | bbbbbbbbb    | -- |
| <i>M. bonariensis</i>          | Brood parasite | Brood parasite | Neotropical | --     | -- | -- | --           | -- |
| <i>M. aeneus</i>               | Brood parasite | Brood parasite | Nearctic    | --     | -- | -- | --           | -- |
| <i>M. ater</i>                 | Brood parasite | Brood parasite | Nearctic    | --     | -- | -- | --           | -- |
| <i>M. oryzivora</i>            | Brood parasite | Brood parasite | Neotropical | --     | -- | -- | --           | -- |

## References

- Bertram BCR (1992) *The ostrich communal nesting system*. Princeton University Press: Princeton.
- Kimwele CN, Graves JA (2003) A molecular genetic analysis of the communal nesting of the ostrich (*Struthio camelus*). *Molecular Ecology* **12**: 229-236.
- Sibley CG, Monroe BL (1990) *Distribution and taxonomy of birds of the world*. Yale University Press: New Haven & London.
- Codenotti TL, Alvarez F (1997) Cooperative breeding between males in the greater rhea *Rhea americana*. *Ibis* **139**: 568-571.
- Davies SJJF (2002) *Ratites and tinamous: Tinamidae, Rheidae, Dromaiidae, Casuariidae, Apterygidae, Struthionidae*. Oxford University Press: Oxford.
- Colbourne R (2002) Incubation behaviour and egg physiology of kiwi (*Apteryx* spp.) in natural habitats. *New Zealand Journal of Ecology* **26**: 129-138.
- Burbidge ML, Colbourne RM, Robertson HA, Baker AJ (2003) Molecular and other biological evidence supports the recognition of at least three species of brown kiwi. *Conservation Genetics* **4**: 167-177.
- Jones DN, Dekker RWRJ, Roselaar CS (1995) *The Megapodes: Megapodiidae*. Oxford University Press: Oxford.
- van Tuinen M, Dyke GJ (2004) Calibration of galliform molecular clocks using multiple fossils and genetic partitions. *Molecular Phylogenetics and Evolution* **30**: 74-86.
- Birks SM, Edwards SV (2002) A phylogeny of the megapodes (Aves: Megapodiidae) based on nuclear and mitochondrial DNA sequences. *Molecular Phylogenetics and Evolution* **23**: 408-421.

- 11 Göth A, Vogel U (2004) Is monogamy in the Polynesian megapode (*Megapodius pritchardii*) related to its high relative egg-weight. *Auk* **121**: 308-317.
- 12 del Hoyo J (1994) Family Cracidae (Chachalacas, guans and curassows). in *Handbook of the birds of the world. Vol. 2. New world vultures to guineafowl.* (ed. del Hoyo J, Elliott A, Saragatal J) p. 310-363. Lynx edicions: Barcelona.
- 13 Pereira SL, Baker AJ, Wajntal A (2002) Combined nuclear and mitochondrial DNA sequences resolve generic relationships within the Cracidae (Galliformes, Aves). *Systematic Biology* **51**: 946-958.
- 14 Peterson MJ (2001) Plain chachalaca. in *Birds of North America: Life Histories for the Twenty-First Century.* (ed. Poole A, Stettenheim P, Gill F) p. 1-24. American Ornithologist's Union and Academy of Natural Sciences, Philadelphia: Washington, D.C.
- 15 Madge S, McGowan P (2002) *Pheasants, partridges and grouse.* Christopher Helm: London.
- 16 Pope MD, Crawford JA (2001) Male incubation and biparental care in mountain quail. *Condor* **103**: 865-870.
- 17 Rodriguez-Teijeiro JD, Puigcerver M, Gallego S, Cordero PJ, Parkin DT (2003) Pair bonding and multiple paternity in the polygamous common quail *Coturnix coturnix*. *Ethology* **109**: 291-302.
- 18 Bush KL, Strobeck C (2003) Phylogenetic relationships of the Phasianidae reveals possible non-pheasant taxa. *Journal of Heredity* **94**: 472-489.
- 19 Lucchini V, Høglund J, Klaus S, Swenson J, Randi E (2001) Historical biogeography and a mitochondrial DNA phylogeny of grouse and ptarmigan. *Molecular Phylogenetics and Evolution* **20**: 149-162.
- 20 Andreev A, Hafner F, Klaus S, Gossow H (2001) Displaying behaviour and mating system in the Siberian Spruce Grouse (*Falcapennis falcapennis* Hartlaub 1855). *Journal fur Ornithologie* **142**: 404-424.
- 21 Carboneras C (1992) Family Anhimidae (Screamers). in *Handbook of the birds of the world. Vol. 1. Ostrich to ducks.* (ed. del Hoyo J, Elliott A, Saragatal J) p. 528-535. Lynx edicions: Barcelona.
- 22 Marchant S, Higgins PJ, eds. (1990) *Handbook of Australian, New Zealand and Antarctic Birds. Volume 1. Ratites to ducks.* Oxford University Press: Melbourne.
- 23 Carboneras C (1992) Family Anatidae (Ducks, geese and swans). in *Handbook of the birds of the world. Vol. 1. Ostrich to ducks.* (ed. del Hoyo J, Elliott A, Saragatal J) p. 536-628. Lynx edicions: Barcelona.
- 24 Hohman WL, Lee SA (2001) Fulvous whistling-duck. in *Birds of North America: Life Histories for the Twenty-First Century.* (ed. Poole A, Stettenheim P, Gill F) p. 1-24. American Ornithologist's Union and Academy of Natural Sciences, Philadelphia: Washington, D.C.
- 25 Kear J (2005) *Ducks, Geese and Swans Vol 1.* Oxford University Press: Oxford.
- 26 James JD, Thompson JE (2001) Black-bellied whistling duck. in *Birds of North America: Life Histories for the Twenty-First Century.* (ed. Poole A, Stettenheim P, Gill F) p. 1-20. American Ornithologist's Union and Academy of Natural Sciences, Philadelphia: Washington, D.C.
- 27 Eitner JC (1999) Masked duck. in *Birds of North America: Life Histories for the Twenty-First Century.* (ed. Poole A, Stettenheim P, Gill F) p. 1-12. American Ornithologist's Union and Academy of Natural Sciences, Philadelphia: Washington, D.C.
- 28 Johnsgard PA, Carbonell M (1996) *Ruddy ducks and other stifftails.* University of Oklahoma Press: Norman.
- 29 McCracken KG (2000) The 20-cm spiny penis of the Argentine lake duck (*Oxyura vittata*). *Auk* **117**: 820-825.
- 30 McCracken KG, Paton DC, Afton AD (2000) Sexual size dimorphism of the musk duck. *Wilson Bulletin* **112**: 457-466.

- 31 Wlodarczyk R, Kolacinski S (2001) "A helper" at the mute swan's nest? *Ornis Fennica* **78**: 135-138.
- 32 Johnsgard PA (1978) *Ducks, geese and swans of the world*. University of Nebraska Press: Lincoln.
- 33 Cramp S, ed. (1977) *The birds of the western Palearctic Vol. I. Ostrich to ducks*. Oxford University Press: Oxford.
- 34 Ely CR, Dzubin AX (1994) Greater white-fronted goose. in *Birds of North America: Life Histories for the Twenty-First Century*. (ed. Poole A, Stettenheim P, Gill F) p. 1-32. American Ornithologist's Union and Academy of Natural Sciences, Philadelphia: Washington, D.C.
- 35 Mowbray TB, Cooke F, Ganter B (2000) Snow goose. in *Birds of North America: Life Histories for the Twenty-First Century*. (ed. Poole A, Stettenheim P, Gill F) p. 1-40. American Ornithologist's Union and Academy of Natural Sciences, Philadelphia: Washington, D.C.
- 36 Ryder JP, Alisauskas RT (1995) Ross' goose. in *Birds of North America: Life Histories for the Twenty-First Century*. (ed. Poole A, Stettenheim P, Gill F) p. 1-28. American Ornithologist's Union and Academy of Natural Sciences, Philadelphia: Washington, D.C.
- 37 Petersen MR, Schmutz JA, Rockwell RF (1994) Emperor goose. in *Birds of North America: Life Histories for the Twenty-First Century*. (ed. Poole A, Stettenheim P, Gill F) p. 1-20. American Ornithologist's Union and Academy of Natural Sciences, Philadelphia: Washington, D.C.
- 38 Banko PC, Black JM, Banko WE (1999) Hawaiian goose (Nene). in *Birds of North America: Life Histories for the Twenty-First Century*. (ed. Poole A, Stettenheim P, Gill F) p. 1-32. American Ornithologist's Union and Academy of Natural Sciences, Philadelphia: Washington, D.C.
- 39 Reed A, Ward DH, Derksen DV, Sedinger JS (1998) Brant. in *Birds of North America: Life Histories for the Twenty-First Century*. (ed. Poole A, Stettenheim P, Gill F) p. 1-30. American Ornithologist's Union and Academy of Natural Sciences, Philadelphia: Washington, D.C.
- 40 Newman K (1982) Anatidae, swans, geese and ducks. in *Birds of Africa Volume 1*. (ed. Brown LH, Urban EK, Newman K) p. 220-293. Academic Press: London.
- 41 Hepp GR, Bellrose FC (1995) Wood duck. in *Birds of North America: Life Histories for the Twenty-First Century*. (ed. Poole A, Stettenheim P, Gill F) p. 1-24. American Ornithologist's Union and Academy of Natural Sciences, Philadelphia: Washington, D.C.
- 42 Leschack CR, McKnight SK, Hepp GR (1997) Gadwall. in *Birds of North America: Life Histories for the Twenty-First Century*. (ed. Poole A, Stettenheim P, Gill F) p. 1-28. American Ornithologist's Union and Academy of Natural Sciences, Philadelphia: Washington, D.C.
- 43 Kear J (2005) *Ducks, Geese and Swans Vol 2: Species accounts (Cairana to Mergus)*. Oxford University Press: Oxford.
- 44 Mowbray T (1999) American wigeon. in *Birds of North America: Life Histories for the Twenty-First Century*. (ed. Poole A, Stettenheim P, Gill F) p. 1-32. American Ornithologist's Union and Academy of Natural Sciences, Philadelphia: Washington, D.C.
- 45 Longcore JR, McAuley DG, Hepp GR, Rhymer JM (2000) American black duck. in *Birds of North America: Life Histories for the Twenty-First Century*. (ed. Poole A, Stettenheim P, Gill F) p. 1-36. American Ornithologist's Union and Academy of Natural Sciences, Philadelphia: Washington, D.C.
- 46 Moorman TE, Gray PN (1994) Mottled duck. in *Birds of North America: Life Histories for the Twenty-First Century*. (ed. Poole A, Stettenheim P, Gill F) p. 1-20. American Ornithologist's Union and Academy of Natural Sciences, Philadelphia: Washington, D.C.
- 47 Drilling N, Titman R, McKinney F (2002) Mallard. in *Birds of North America: Life Histories for the Twenty-First Century*. (ed. Poole A, Stettenheim P, Gill F) p. 1-44. American Ornithologist's Union and Academy of Natural Sciences, Philadelphia: Washington, D.C.
- 48 Engilis A, Uyehara KJ, Giffin JG (2002) Hawaiian duck. in *Birds of North America: Life Histories for the Twenty-First Century*. (ed. Poole A, Stettenheim P, Gill F) p. 1-20. American Ornithologist's Union and Academy of Natural Sciences, Philadelphia: Washington, D.C.
- 49 Moulton DW, Marshall AP (1996) Laysan duck. in *Birds of North America: Life Histories for the Twenty-First Century*. (ed. Poole A, Stettenheim P, Gill F) p. 1-20. American Ornithologist's Union and Academy of Natural Sciences, Philadelphia: Washington, D.C.
- 50 Rohwer FC, Johnson WP, Loos ER (2002) Blue-winged teal. in *Birds of North America: Life Histories for the Twenty-First Century*. (ed. Poole A, Stettenheim P, Gill F) p. 1-36. American Ornithologist's Union and Academy of Natural Sciences, Philadelphia: Washington, D.C.



- 51 Gammonley JH (1996) Cinnamon teal. in *Birds of North America: Life Histories for the Twenty-First Century*. (ed. Poole A, Stettenheim P, Gill F) p. 1-20. American Ornithologist's Union and Academy of Natural Sciences, Philadelphia: Washington, D.C.
- 52 Dubowoy PJ (1996) Northern shoveler. in *Birds of North America: Life Histories for the Twenty-First Century*. (ed. Poole A, Stettenheim P, Gill F) p. 1-24. American Ornithologist's Union and Academy of Natural Sciences, Philadelphia: Washington, D.C.
- 53 Austin JE, Miller MR (1995) Northern pintail. in *Birds of North America: Life Histories for the Twenty-First Century*. (ed. Poole A, Stettenheim P, Gill F) p. 1-32. American Ornithologist's Union and Academy of Natural Sciences, Philadelphia: Washington, D.C.
- 54 Johnson KP (1995) Green-winged teal. in *Birds of North America: Life Histories for the Twenty-First Century*. (ed. Poole A, Stettenheim P, Gill F) p. 1-20. American Ornithologist's Union and Academy of Natural Sciences, Philadelphia: Washington, D.C.
- 55 Mowbray TB (2002) Canvasback. in *Birds of North America: Life Histories for the Twenty-First Century*. (ed. Poole A, Stettenheim P, Gill F) p. 1-40. American Ornithologist's Union and Academy of Natural Sciences, Philadelphia: Washington, D.C.
- 56 Woodin MC, Michot TC (2002) Redhead. in *Birds of North America: Life Histories for the Twenty-First Century*. (ed. Poole A, Stettenheim P, Gill F) p. 1-40. American Ornithologist's Union and Academy of Natural Sciences, Philadelphia: Washington, D.C.
- 57 Hohman WL, Eberhardt RT (1998) Ring-necked duck. in *Birds of North America: Life Histories for the Twenty-First Century*. (ed. Poole A, Stettenheim P, Gill F) p. 1-32. American Ornithologist's Union and Academy of Natural Sciences, Philadelphia: Washington, D.C.
- 58 Kessel B, Rocque DA, Barclay JS (2002) Greater scaup. in *Birds of North America: Life Histories for the Twenty-First Century*. (ed. Poole A, Stettenheim P, Gill F) p. 1-32. American Ornithologist's Union and Academy of Natural Sciences, Philadelphia: Washington, D.C.
- 59 Austin JE, Custer CM, Afton AD (1998) Lesser scaup. in *Birds of North America: Life Histories for the Twenty-First Century*. (ed. Poole A, Stettenheim P, Gill F) p. 1-32. American Ornithologist's Union and Academy of Natural Sciences, Philadelphia: Washington, D.C.
- 60 Goudie RI, Robertson GJ, Reed A (2000) Common eider. in *Birds of North America: Life Histories for the Twenty-First Century*. (ed. Poole A, Stettenheim P, Gill F) p. 1-32. American Ornithologist's Union and Academy of Natural Sciences, Philadelphia: Washington, D.C.
- 61 Suydam RS (2000) King eider. in *Birds of North America: Life Histories for the Twenty-First Century*. (ed. Poole A, Stettenheim P, Gill F) p. 1-28. American Ornithologist's Union and Academy of Natural Sciences, Philadelphia: Washington, D.C.
- 62 Petersen MR, Grand JD, Dau CP (2000) Spectacled eider. in *Birds of North America: Life Histories for the Twenty-First Century*. (ed. Poole A, Stettenheim P, Gill F) p. 1-24. American Ornithologist's Union and Academy of Natural Sciences, Philadelphia: Washington, D.C.
- 63 Fredrickson LH (2001) Steller's eider. in *Birds of North America: Life Histories for the Twenty-First Century*. (ed. Poole A, Stettenheim P, Gill F) p. 1-24. American Ornithologist's Union and Academy of Natural Sciences, Philadelphia: Washington, D.C.
- 64 Robertson GJ, Goudie RI (2000) Harlequin duck. in *Birds of North America: Life Histories for the Twenty-First Century*. (ed. Poole A, Stettenheim P, Gill F) p. 1-32. American Ornithologist's Union and Academy of Natural Sciences, Philadelphia: Washington, D.C.
- 65 Robertson GJ, Savard J-PL (2002) Long-tailed duck. in *Birds of North America: Life Histories for the Twenty-First Century*. (ed. Poole A, Stettenheim P, Gill F) p. 1-28. American Ornithologist's Union and Academy of Natural Sciences, Philadelphia: Washington, D.C.
- 66 Bordage D, Savard J-PL (1995) Black scoter. in *Birds of North America: Life Histories for the Twenty-First Century*. (ed. Poole A, Stettenheim P, Gill F) p. 1-20. American Ornithologist's Union and Academy of Natural Sciences, Philadelphia: Washington, D.C.
- 67 Savard J-PL, Bordage D, Reed A (1998) Surf scoter. in *Birds of North America: Life Histories for the Twenty-First Century*. (ed. Poole A, Stettenheim P, Gill F) p. 1-28. American Ornithologist's Union and Academy of Natural Sciences, Philadelphia: Washington, D.C.
- 68 Brown PW, Fredrickson LH (1997) White-winged scoter. in *Birds of North America: Life Histories for the Twenty-First Century*. (ed. Poole A, Stettenheim P, Gill F) p. 1-28. American Ornithologist's Union and Academy of Natural Sciences, Philadelphia: Washington, D.C.
- 69 Eadie JM, Mallory ML, Lumsden HG (1995) Common goldeneye. in *Birds of North America: Life Histories for the Twenty-First Century*. (ed. Poole A, Stettenheim P, Gill F) p. 1-32. American Ornithologist's Union and Academy of Natural Sciences, Philadelphia: Washington, D.C.
- 70 Eadie JM, Savard J-PL, Mallory ML (2000) Barrow's goldeneye. in *Birds of North America: Life Histories for the Twenty-First Century*. (ed. Poole A, Stettenheim P, Gill F) p. 1-32. American Ornithologist's Union and Academy of Natural Sciences, Philadelphia: Washington, D.C.

- 71 Gauthier G (1993) Bufflehead. in *Birds of North America: Life Histories for the Twenty-First Century*. (ed. Poole A, Stettenheim P, Gill F) p. 1-24. American Ornithologist's Union and Academy of Natural Sciences, Philadelphia: Washington, D.C.
- 72 Dugger BD, Dugger KM, Fredrickson LH (1994) Hooded merganser. in *Birds of North America: Life Histories for the Twenty-First Century*. (ed. Poole A, Stettenheim P, Gill F) p. 1-24. American Ornithologist's Union and Academy of Natural Sciences, Philadelphia: Washington, D.C.
- 73 Titman RD (1999) Red-breasted merganser. in *Birds of North America: Life Histories for the Twenty-First Century*. (ed. Poole A, Stettenheim P, Gill F) p. 1-24. American Ornithologist's Union and Academy of Natural Sciences, Philadelphia: Washington, D.C.
- 74 Mallory M, Metz K (1999) Common merganser. in *Birds of North America: Life Histories for the Twenty-First Century*. (ed. Poole A, Stettenheim P, Gill F) p. 1-28. American Ornithologist's Union and Academy of Natural Sciences, Philadelphia: Washington, D.C.
- 75 Tobias JA, Züchner T, de Melo-Júnior TA (2002) Family Galbulidae (Jacamars). in *Handbook of the birds of the world. Vol. 7. Jacamars to woodpeckers*. (ed. del Hoyo J, Elliott A, Saragatal J) p. 74-101. Lynx edicions: Barcelona.
- 76 Johansson US, Irestedt M (2003) Molecular support for a sister group relationship between Pici and Galbulae (Piciformes *sensu* Wetmore 1960). *Journal of Avian Biology* **34**: 185-197.
- 77 Tobias JA, Seddon N (2003) Breeding, foraging, and vocal behavior of the white-throated jacamar (*Brachygalba albogularis*). *Wilson Bulletin* **115**: 237-240.
- 78 Langham GM (2003) personal communication.
- 79 Hilty SL (2003) *Birds of Venezuela*. Princeton University Press: Princeton.
- 80 Rasmussen PC, Collar NJ (2002) Family Bucconidae (Puffbirds). in *Handbook of the birds of the world. Vol. 7. Jacamars to woodpeckers*. (ed. del Hoyo J, Elliott A, Saragatal J) p. 102-139. Lynx edicions: Barcelona.
- 81 Short LL, Horne JFM (2001) *Toucans, barbets and honeyguides: Ramphastidae, Capitonidae and Indicatoridae*. Oxford University Press: Oxford.
- 82 Moyle RG (2004) Phylogenetics of barbets (Aves: Piciformes) based on nuclear and mitochondrial DNA sequence data. *Molecular Phylogenetics and Evolution* **36**: 187-200.
- 83 Restrepo C, Mondragon ML (1998) Cooperative breeding in the frugivorous toucan barbet (*Semnornis ramphastinus*). *Auk* **115**: 4-15.
- 84 Winkler H, Christie DA (2002) Family Picidae (Woodpeckers). in *Handbook of the birds of the world. Vol. 7. Jacamars to woodpeckers*. (ed. del Hoyo J, Elliott A, Saragatal J) p. 310-363. Lynx edicions: Barcelona.
- 85 Webb DM, Moore WS (2005) A phylogenetic analysis of woodpeckers and their allies using 12S, CytB, and COI nucleotide sequences (class Aves, order Piciformes). *Molecular Phylogenetics and Evolution* **36**: 233-248.
- 86 Tobalske BW (1997) Lewis' woodpecker. in *Birds of North America: Life Histories for the Twenty-First Century*. (ed. Poole A, Stettenheim P, Gill F) p. 1-28. American Ornithologist's Union and Academy of Natural Sciences, Philadelphia: Washington, D.C.
- 87 Trombino C (2000) Helping behavior within sapsuckers (*Sphyrapicus* spp.). *Wilson Bulletin* **112**: 273-275.
- 88 Dobbs RC, Martin TE, Conway CJ (1997) Williamson's sapsucker. in *Birds of North America: Life Histories for the Twenty-First Century*. (ed. Poole A, Stettenheim P, Gill F) p. 1-20. American Ornithologist's Union and Academy of Natural Sciences, Philadelphia: Washington, D.C.
- 89 Yamagami N (1992) [An observation of the Japanese pygmy woodpecker *Dendrocopos kizuki* and their helper]. *Strix* **11**: 336-338.
- 90 Wiktander U, Olsson O, Nilsson SG (2000) Parental care and social mating system in the lesser spotted woodpecker *Dendrocopos minor*. *Journal of Avian Biology* **31**: 447-456.

- 91 Pasinelli G (1993) Nachweis eines Helfers bei einer Brut des Mittelspechts *Dendrocopos medius*. *Ornithologische Beobachter* **90**: 303-304.
- 92 Kotaka N (1998) Classical polyandry in the great spotted woodpecker *Dendrocopos major*. *Ibis* **140**: 335-336.
- 93 Jackson JA, Ouellet HR (2002) Downy woodpecker. in *Birds of North America: Life Histories for the Twenty-First Century*. (ed. Poole A, Stettenheim P, Gill F) p. 1-32. American Ornithologist's Union and Academy of Natural Sciences, Philadelphia: Washington, D.C.
- 94 Ojeda VS (2004) Breeding biology and social behaviour of magellanic woodpeckers (*Campephilus magellanicus*) in Argentine Patagonia. *European Journal of Wildlife Research* **50**: 18-24.
- 95 Oatley T (2003) Going to ground. The life of a terrestrial woodpecker. *Africa Birds & Birding* **8**: 28-33.
- 96 Sudbeck P, Meinecke H (1992) Grauspecht-Weibchen *Picus canus* als Helfer an der Bruthöhle. *Journal für Ornithologie* **133**: 443-446.
- 97 Lammertink M (2004) Grouping and cooperative breeding in the great slaty woodpecker. *Condor* **106**: 309-319.
- 98 Kemp AC (1995) *The Hornbills*. Oxford University Press: Oxford.
- 99 Smythies BE, Davidson GWH (1999) *Birds of Borneo 4th ed*. Natural History Publications: Kinabalu.
- 100 Styring AR, Lomoljo RM, Bin Hussin MZ (2002) Observations of a bushy-crested hornbill (*Anorrhinus galeritus*) nest in a west Malaysian forest reserve: insights on feeding behaviour and group size. *Malayan Nature Journal* **56**: 169-173.
- 101 Martin-Vivaldi M, Gabriel Martinez J, Javier Palomino J, Soler M (2002) Extrapair paternity in the hoopoe *Upupa epops*: an exploration of the influence of interactions between breeding pairs, non-pair males and strophe length. *Ibis* **144**: 236-247.
- 102 Sibley CG, Ahlquist JE (1990) *Phylogeny and classification of birds: a study in molecular evolution*. Yale University Press: New Haven & London.
- 103 Skead CJ (1950) A study of the African hoopoe. *Ibis* **92**: 434-463.
- 104 Ligon JD (2001) Family Phoeniculidae (Woodhoopoes). in *Handbook of the birds of the world. Vol. 6. Mousebirds to hornbills*. (ed. del Hoyo J, Elliott A, Saragatal J) p. 412-435. Lynx edicions: Barcelona.
- 105 Collar NJ (2001) Family Trogonidae (Trogons). in *Handbook of the birds of the world. Vol. 6. Mousebirds to hornbills*. (ed. del Hoyo J, Elliott A, Saragatal J) p. 80-129. Lynx edicions: Barcelona.
- 106 Moyle RG (2005) Phylogeny and biogeographical history of Trogoniformes, a pantropical bird order. *Biological Journal of Linnaean Society* **84**: 725-738.
- 107 Aviles JM, Sanchez JM (1999) Uncommon helper behaviour in the roller *Coracias garrulus*. *Alauda* **67**: 75.
- 108 Balanca G, de Visscher M-N (1996) Observations sur la reproduction et les déplacements du rolrier d'Abyssinie *Coracias abyssinica*, du rolrier varie *C. naevia* et du rolle africain *Eurysomus glaucurus*, au nord du Burkina Faso. *Malimbus* **18**: 44-57.
- 109 Fry CH (2001) Family Coraciidae (Rollers). in *Handbook of the birds of the world. Vol. 6. Mousebirds to hornbills*. (ed. del Hoyo J, Elliott A, Saragatal J) p. 342-377. Lynx edicions: Barcelona.
- 110 Langrand O (2001) Family Brachypteracidae (Ground-rollers). in *Handbook of the birds of the world. Vol. 6. Mousebirds to hornbills*. (ed. del Hoyo J, Elliott A, Saragatal J) p. 378-389. Lynx edicions: Barcelona.

- 111 Goodman SM (2001) Family Leptosomidae (Cuckoo-roller). in *Handbook of the birds of the world. Vol. 6. Mousebirds to hornbills.* (ed. del Hoyo J, Elliott A, Saragatal J) p. 390-395. Lynx edicions: Barcelona.
- 112 Fry CH (2001) Family Meropidae (Bee-eaters). in *Handbook of the birds of the world. Vol. 6. Mousebirds to hornbills.* (ed. del Hoyo J, Elliott A, Saragatal J) p. 286-341. Lynx edicions: Barcelona.
- 113 Ligon JD, Burt DB (2004) Evolutionary origins. in *Ecology and evolution of cooperative breeding in birds.* (ed. Koenig WD, Dickinson JL) p. 5-34. Cambridge University Press: Cambridge.
- 114 Fry CH, Fry K, Harris A (1992) *Kingfishers, bee-eaters and rollers.* Princeton University Press: Princeton.
- 115 Douthwaite RJ (1986) Effects of drift sprays of endosulfan, applied for testse-fly control, on breeding little bee-eaters in Somalia. *Environmental Pollution (ser A)* **41**: 11-22.
- 116 Fry CH (1988) Meropidae, bee-eaters. in *The Birds of Africa. Vol III.* (ed. Fry CH, Keith S, Urban EK) p. 302-337. Academic Press: London.
- 117 Boland CRJ (2004) Breeding biology of rainbow bee-eaters (*Merops ornatus*): a migratory, colonial, cooperative bird. *Auk* **121**: 811-823.
- 118 Burt DB (2002) Social and breeding biology of bee-eaters in Thailand. *Wilson Bulletin* **114**: 275-279.
- 119 Sridhar S, Praveen Karanth K (1993) Helpers in cooperatively breeding small green bee-eater (*Merops orientalis*). *Current Science* **65**: 489-490.
- 120 Woodall PF (2001) Family Alcedinidae (Kingfishers). in *Handbook of the birds of the world. Vol. 6. Mousebirds to hornbills.* (ed. del Hoyo J, Elliott A, Saragatal J) p. 130-249. Lynx edicions: Barcelona.
- 121 Hams MJ (1994) Belted kingfisher. in *Birds of North America: Life Histories for the Twenty-First Century.* (ed. Poole A, Stettenheim P, Gill F) p. 1-16. American Ornithologist's Union and Academy of Natural Sciences, Philadelphia: Washington, D.C.
- 122 Reyer U (1980) Sexual dimorphism and cooperative breeding in the striped kingfisher. *Ostrich* **51**: 117-118.
- 123 Kesler DC, Haig SM (2005) Selection of arboreal termitaria for nesting by cooperatively breeding Micronesian kingfishers *Todiramphus cinnamominus reichenbachi*. *Ibis* **147**: 188-196.
- 124 Beckon WN (1987) Evidence of cooperative nest excavation by the white-collared kingfisher *Halcyon chloris* in Fiji. *Ibis* **129**: 391-392.
- 125 Hadden D (2004) *Birds and bird lore of Bougainville and the North Solomons.* Dove: Alderley, Queensland.
- 126 Snow DW (2001) Family Momotidae (Motmots). in *Handbook of the birds of the world. Vol. 6. Mousebirds to hornbills.* (ed. del Hoyo J, Elliott A, Saragatal J) p. 264-285. Lynx edicions: Barcelona.
- 127 Kepler AK (2001) Family Todidae (Todies). in *Handbook of the birds of the world. Vol. 6. Mousebirds to hornbills.* (ed. del Hoyo J, Elliott A, Saragatal J) p. 250-263. Lynx edicions: Barcelona.
- 128 Decoux JP (1988) Coliidae, mousebirds or colies. in *The Birds of Africa. Vol III.* (ed. Fry CH, Keith S, Urban EK) p. 197-242. Academic Press: London.
- 129 Payne RB (2005) *The cuckoos.* Oxford University Press: Oxford.
- 130 Sorenson MD, Payne RB (2005) A molecular genetic analysis of cuckoo phylogeny. in *The cuckoos.* (ed. Payne RB) p. 68-94. Oxford University Press: Oxford.

- 131 Goymann W, Wittenzeller A, Wingfield JC (2004) Competing females and caring males, polyandry and sex-role reversal in African black coucals, *Centropus grillii*. *Ethology* **110**: 807-823.
- 132 Ralph CP (1975) Life style of *Coccyzus pumilus*, a tropical cuckoo. *Condor* **77**: 60-72.
- 133 Hughes JM (1999) Yellow-billed cuckoo. in *Birds of North America: Life Histories for the Twenty-First Century*. (ed. Poole A, Stettenheim P, Gill F) p. 1-28. American Ornithologist's Union and Academy of Natural Sciences, Philadelphia: Washington, D.C.
- 134 Thomas BT (1996) Family Opisthocomidae (Hoatzin). in *Handbook of the birds of the world. Vol. 3. Hoatzin to auks*. (ed. del Hoyo J, Elliott A, Saragatal J) p. 24-33. Lynx edicions: Barcelona.
- 135 Johnson KP, Goodman SM, Lanyon SM (2000) A phylogenetic study of the Malagasy couas with insights into cuckoo relationships. *Molecular Phylogenetics and Evolution* **14**: 436-444.
- 136 Fain MG, Houde P (2004) Parallel radations in the primary clades of birds. *Evolution* **58**: 2558-2573.
- 137 Collar NJ (1997) Family Psittacidae (Parrots). in *Handbook of the birds of the world. Vol. 4. Sandgrouse to cuckoos*. (ed. del Hoyo J, Elliott A, Saragatal J) p. 280-479. Lynx edicions: Barcelona.
- 138 Juniper T, Parr M (1998) *Parrots: a guide to the parrots of the world*. Pica Press: Sussex.
- 139 Higgins PJ, ed. (1999) *Handbook of Australian, New Zealand and Antarctic Birds. Volume 4: Parrots to dollarbird*. Oxford University Press: Melbourne.
- 140 Rowley I (1997) Family Cacatuidae (Cockatoos). in *Handbook of the birds of the world. Vol. 4. Sandgrouse to cuckoos*. (ed. del Hoyo J, Elliott A, Saragatal J) p. 246-279. Lynx edicions: Barcelona.
- 141 Wilson PR, Karl BJ, Toft RJ, Beggs JR, Taylor RH (1998) The role of introduced predators and competitors in the decline of kaka (*Nestor meridionalis*) populations in New Zealand. *Biological Conservation* **83**: 175-185.
- 142 Bergman S (1960) The smallest parrots of the world. *Avicultural Magazine* **66**: 209-215.
- 143 Frith CB, Frith DW (1993) Notes on birds found nesting at Iron Range, Cape York Peninsula, November-December 1990. *Sunbird* **23**: 44-58.
- 144 Heinsohn R, Legge S (2003) Breeding biology of the reverse-dichromatic, co-operative parrot *Eclectus roratus*. *Journal of Zoology, London* **259**: 197-208.
- 145 Ekstrom J (2002) personal communication.
- 146 Wilkinson R, Birkhead TR (1995) Copulation behaviour in the vasa parrots *Coracopsis vasa* and *C. nigra*. *Ibis* **137**: 117-119.
- 147 Fry CH, Keith S, Urban EK, eds. (1988) *The Birds of Africa Vol III*. Academic Press: London.
- 148 Forshaw JM, Cooper WT (1973) *Parrots of the world*. Lansdowne: Melbourne.
- 149 Oren DC, Novaes FC (1986) Observations on the golden parakeet *Aratinga guarouba* in northern Brazil. *Biological Conservation* **36**: 329-337.
- 150 Brightsmith DJ (1999) Cooperative breeding in parrots and introduction to the column Wild Science. Bird Talk October 1999: <http://www.duke.edu/~djb4/>.

- 151 Brightsmith DJ (2005) Parrot nesting in southeastern Peru: seasonal patterns and keystone trees. *Wilson Bulletin* **117**: 296-305.
- 152 Bucher EH, Martin LF, Martella MB, Navarro JL (1990) Social behaviour and population dynamics of the monk parakeet. in *Acta 20 Congressus Internationalis Ornithologici. Christchurch, New Zealand 2-9 December 1990. Volume 2.* (ed. Bell BD, Cossee RO, Flux JEC, Heather BD, Hitchmough RA, Robertson CJR, Williams MJ) p. 681-689. New Zealand Ornithological Congress Trust Board, Wellington.:
- 153 Aramburu RM (1996) Nidadas supernormales en cotorra comun *Myiopsitta monachus monachus* (Aves: Psittacidae). *Ornitologia Neotropical* **7**: 155-156.
- 154 Eberhard JR (1998) Breeding biology of the monk parakeet. *Wilson Bulletin* **110**: 463-473.
- 155 Brightsmith D (1999) White-winged parakeet and yellow-chevroned parakeet. in *Birds of North America: Life Histories for the Twenty-First Century.* (ed. Poole A, Stettenheim P, Gill F) p. 1-24. American Ornithologist's Union and Academy of Natural Sciences, Philadelphia: Washington, D.C.
- 156 Chantler P (1999) Family Apodidae (Swifts). in *Handbook of the Birds of the World. Vol 5. Barn-Owls to Hummingbirds.* (ed. del Hoyo J, Elliott A, Sargatal J) p. 388-457. Lynx Editions: Barcelona.
- 157 Tarburton M (2003) The breeding biology of the mountain swiftlet, *Aerodramus hirundinaceus*, in Irian Jaya. *Emu* **103**: 177-182.
- 158 Brooke RK (1973) Distributional and biological notes on the mottled swift in Rhodesia. *Ostrich* **44**: 106-110.
- 159 Bull EL, Collins CT (1993) Vaux's swift. in *Birds of North America: Life Histories for the Twenty-First Century.* (ed. Poole A, Stettenheim P, Gill F) p. 1-12. American Ornithologist's Union and Academy of Natural Sciences, Philadelphia: Washington, D.C.
- 160 Woolfenden GE (1976) Co-operative breeding in American birds. in *Proceedings of the 16th International Ornithological Congress.* (ed. Frith HJ, Calaby JH) p. 674-684. Australian Academy of Science: Canberra.
- 161 Brown JL (1987) *Helping and communal breeding in birds: ecology and evolution.* Princeton University Press: Princeton.
- 162 Sick H (1958) Geselligkeit, schornstein-benutzung und überwinterung beim brasilianischen stachelschwanzsegler *Cheatura andrei*. *Die Vogelwarte* **19**: 248-253.
- 163 Sick H (1959) Notes on the biology of two Brazilian swifts, *Chaetura andrei* and *C. cinereiventris*. *Auk* **76**: 471-477.
- 164 Wells DR (1999) Family Hemiprocnidae (Tree-swifts). in *Handbook of the Birds of the World. Vol 5. Barn-Owls to Hummingbirds.* (ed. del Hoyo J, Elliott A, Sargatal J) p. 458-467. Lynx Editions: Barcelona.
- 165 Schuchmann KL (1999) Family Trochilidae (Hummingbirds). in *Handbook of the Birds of the World. Vol 5. Barn-Owls to Hummingbirds.* (ed. del Hoyo J, Elliott A, Sargatal J) p. 388-457. Lynx Editions: Barcelona.
- 166 Forshaw JM, Cooper WT (2002) *Turacos: a natural history of the Musophagidae.* Nokomis: Melbourne.
- 167 Veron G, Winney BJ (2000) Phylogenetic relationships within the turacos (Musophagidae). *Ibis* **142**: 446-456.
- 168 Berry RJ, Todd WW (2002) Turacos in aviculture. in *Turacos: a natural history of the Musophagidae.* (ed. Forshaw JM, Cooper WT) p. 35-45. Nokomis: Melbourne.
- 169 König C, Weick F, Becking J-H (1999) *Owls: a Guide to the Owls of the World.* Pica Press: Sussex.
- 170 Smith DG, Hiestand E (1990) Alloparenting at an eastern screech-owl nest. *Condor* **92**: 246-247.

- 171 Pitman CRS, Adamson J (1987) Notes on the ecology of the giant eagle owl *Bubo lactus*. *Honeyguide* **95**: 3-23.
- 172 Bull EL, Duncan JR (1993) Great gray owl. in *Birds of North America: Life Histories for the Twenty-First Century*. (ed. Poole A, Stettenheim P, Gill F) p. 1-20. American Ornithologist's Union and Academy of Natural Sciences, Philadelphia: Washington, D.C.
- 173 Johnson BS (1997) Reproductive success, relatedness, and mating patterns of colonial burrowing owls. *Raptor Research Report* **9**: 64-67.
- 174 Marks JS, Dickinson JL, Haydock J (2002) Serial polyandry and alloparenting in long-eared owls. *Condor* **104**: 202-204.
- 175 Holyoak DT, Woodcock M (2001) *Nightjars and the allies: the Caprimulgiformes*. Oxford University Press: Oxford.
- 176 Mariaux J, Braun MJ (1996) A molecular phylogenetic survey of the nightjars and allies (Caprimulgiformes) with special emphasis on the potoos (Nyctibiidae). *Molecular Phylogenetics and Evolution* **6**: 228-244.
- 177 Collar NJ (1996) Family Otidae (Bustards). in *Handbook of the birds of the world. Vol. 3. Hoatzin to auks*. (ed. del Hoyo J, Elliott A, Saragatal J) p. 240-275. Lynx edicions: Barcelona.
- 178 Pitra C, Lieckfeldt D, Frahnert S, Fickel J (2002) Phylogenetic relationships and ancestral areas of the bustards (Gruiformes : Otidae), inferred from mitochondrial DNA and nuclear intron sequences. *Molecular Phylogenetics and Evolution* **23**: 63-74.
- 179 Archibald GW, Meine CD (1996) Family Gruidae (Cranes). in *Handbook of the birds of the world. Vol. 3. Hoatzin to auks*. (ed. del Hoyo J, Elliott A, Saragatal J) p. 60-89. Lynx edicions: Barcelona.
- 180 Bertram BCR (1996) Family Heliornithidae (Finfoots). in *Handbook of the birds of the world. Vol. 3. Hoatzin to auks*. (ed. del Hoyo J, Elliott A, Saragatal J) p. 210-217. Lynx edicions: Barcelona.
- 181 Bryan DC (1996) Family Aramidae (Limpkin). in *Handbook of the birds of the world. Vol. 3. Hoatzin to auks*. (ed. del Hoyo J, Elliott A, Saragatal J) p. 90-95. Lynx edicions: Barcelona.
- 182 Sherman PT (1996) Family Psophiidae (Trumpeters). in *Handbook of the birds of the world. Vol. 3. Hoatzin to auks*. (ed. del Hoyo J, Elliott A, Saragatal J) p. 96-107. Lynx edicions: Barcelona.
- 183 Gonzaga LP (1996) Family Cariamidae (Seriemas). in *Handbook of the birds of the world. Vol. 3. Hoatzin to auks*. (ed. del Hoyo J, Elliott A, Saragatal J) p. 234-239. Lynx edicions: Barcelona.
- 184 Taylor B, von Perlo B (1998) *Rails: a guide to the rails, crakes, gallinules and coots of the world*. Pica Press: Sussex.
- 185 Ritter MW (1994) Notes on the nesting and growth of Mariana common moorhens on Guam. *Micronesica* **27**: 127-132.
- 186 Plumb WJ (1978) Co-operative feeding of young by adult and sub-adult red-knobbed coots. *East African Natural History Society Bulletin* 1978 (July-August): 88.
- 187 Carr G (1993) Juvenile common coot incubating eggs. *British Birds* **86**: 626-627.
- 188 Wood NA (1974) The breeding behaviour and biology of the moorhen. *British Birds* **67**: 137-158.
- 189 Hunt GR (1996) Family Rhynchotidae (Kagu). in *Handbook of the birds of the world. Vol. 3. Hoatzin to auks*. (ed. del Hoyo J, Elliott A, Saragatal J) p. 218-225. Lynx edicions: Barcelona.
- 190 Thomas BT (1996) Family Eurypygidae (Sunbittern). in *Handbook of the birds of the world. Vol. 3. Hoatzin to auks*. (ed. del Hoyo J, Elliott A, Saragatal J) p. 226-233. Lynx edicions: Barcelona.

- 191 Seddon N, Tobias JA, Butchart SHM (2003) Group living, breeding behaviour and territoriality in the subdesert mesite. *Ibis* **145**: 277-294.
- 192 Seddon N, Amos W, Mulder RA, Tobias JA (2004) Male heterozygosity predicts territory size, song structure and reproductive success in a cooperatively breeding bird. *Proceedings of the Royal Society of London Series B-Biological Sciences* **271**: 1823-1829.
- 193 Singh Kalsi R, Kalsi R (1992) Unusual nesting behaviour in the domestic pigeon *Columba livia* Gmelin. *Journal of the Bombay Natural History Society* **89**: 253-4.
- 194 Gibbs D, Barnes E, Cox J (2001) *Pigeons and doves: a guide to the pigeons and doves of the world*. Pica Press: Sussex.
- 195 Baptista LF, Trail PW, Horblit HM (1997) Family Columbidae (Pigeons and Doves). in *Handbook of the birds of the world. Vol. 4. Sandgrouse to cuckoos*. (ed. del Hoyo J, Elliott A, Saragatal J) p. 60-245. Lynx edicions: Barcelona.
- 196 Orenstein RI, Bruce MB (1976) Comments on the nesting and pumage of the orange dove *Ptilonopus victor*. *Bulletin of the British Ornithologists Club* **96**: 2-4.
- 197 Beckon WN (1982) A breeding record of the whistling dove of Kadavu, Fiji. *Notornis* **29**: 1-7.
- 198 van Tuinen M, Waterhouse D, Dyke GJ (2004) Avian molecular systematics on the rebound: a fresh look at modern shorebird phylogenetic relationships. *Journal of Avian Biology* **35**: 191-194.
- 199 Thomas GH, Wills MA, Székely T (2004) Phylogeny of shorebirds, gulls, and alcids (Aves: Charadrii) from the cytochrome-*b* gene: parsimony, Bayesian inference, minimum evolution, and quartet puzzling. *Molecular Phylogenetics and Evolution* **30**: 516-526.
- 200 Paton TA, Baker AJ, Groth JG, Barrowclough GF (2003) RAG-1 sequences resolve phylogenetic relationships within Charadriiform birds. *Molecular Phylogenetics and Evolution* **29**: 268-278.
- 201 Piersma T, van Gils J, Wiersma P (1996) Family Scolopacidae (Sandpipers, snipes and phalaropes). in *Handbook of the birds of the world. Vol. 3. Hoatzin to auks*. (ed. del Hoyo J, Elliott A, Saragatal J) p. 444-533. Lynx edicions: Barcelona.
- 202 Thomas GH, Wills MA, Székely T (2004) A supertree approach to shorebird phylogeny. *BMC Evolutionary Biology* **4**: 28.
- 203 Hussell DJT (2004) Incubation period and behavior at a bar-tailed godwit nest. *Wilson Bulletin* **116**: 177-178.
- 204 Jenni DA (1996) Family Jacanidae (Jacanas). in *Handbook of the birds of the world. Vol. 3. Hoatzin to auks*. (ed. del Hoyo J, Elliott A, Saragatal J) p. 276-291. Lynx edicions: Barcelona.
- 205 Whittingham LA, Sheldon FH, Emlen ST (2000) Molecular phylogeny of jacanas and its implications for morphologic and biogeographic evolution. *Auk* **117**: 22-32.
- 206 Kirwan GM (1996) Family Rostratulidae (Painted-snipes). in *Handbook of the birds of the world. Vol. 3. Hoatzin to auks*. (ed. del Hoyo J, Elliott A, Saragatal J) p. 292-301. Lynx edicions: Barcelona.
- 207 Fjeldså J (1996) Family Thinocoridae (Seedsnipes). in *Handbook of the birds of the world. Vol. 3. Hoatzin to auks*. (ed. del Hoyo J, Elliott A, Saragatal J) p. 538-545. Lynx edicions: Barcelona.
- 208 Burger J, Gochfeld M (1996) Family Laridae (Gulls). in *Handbook of the birds of the world. Vol. 3. Hoatzin to auks*. (ed. del Hoyo J, Elliott A, Saragatal J) p. 572-623. Lynx edicions: Barcelona.
- 209 Zusi RL (1996) Family Rynchopidae (Skimmers). in *Handbook of the birds of the world. Vol. 3. Hoatzin to auks*. (ed. del Hoyo J, Elliott A, Saragatal J) p. 668-677. Lynx edicions: Barcelona.
- 210 Gochfeld M, Burger J (1996) Family Sternidae (Terns). in *Handbook of the birds of the world. Vol. 3. Hoatzin to auks*. (ed. del Hoyo J, Elliott A, Saragatal J) p. 624-667. Lynx edicions: Barcelona.



- 211 Bridge ES, Jones AW, Baker AJ (2005) A phylogenetic framework for the terns (Sternini) inferred from mt DNA sequences: implications for taxonomy and plumage evolution. *Molecular Phylogenetics and Evolution* **35**: 459-469.
- 212 Niethammer KR, Patrick LB (1998) White tern. in *Birds of North America: Life Histories for the Twenty-First Century*. (ed. Poole A, Stettenheim P, Gill F) p. 1-20. American Ornithologist's Union and Academy of Natural Sciences, Philadelphia: Washington, D.C.
- 213 Schreiber EA, Feare CJ, Harrington BA, Murray BG, Robertson WB, Robertson MJ, Woolfenden GE (2002) Sooty tern. in *Birds of North America: Life Histories for the Twenty-First Century*. (ed. Poole A, Stettenheim P, Gill F) p. 1-32. American Ornithologist's Union and Academy of Natural Sciences, Philadelphia: Washington, D.C.
- 214 Gochfeld M, Burger J, Nisbet ICT (1998) Roseate tern. in *Birds of North America: Life Histories for the Twenty-First Century*. (ed. Poole A, Stettenheim P, Gill F) p. 1-32. American Ornithologist's Union and Academy of Natural Sciences, Philadelphia: Washington, D.C.
- 215 Nisbet ICT (2002) Common tern. in *Birds of North America: Life Histories for the Twenty-First Century*. (ed. Poole A, Stettenheim P, Gill F) p. 1-40. American Ornithologist's Union and Academy of Natural Sciences, Philadelphia: Washington, D.C.
- 216 Ludwigs J-D (2004) A case of cooperative polyandry in the common tern. *Waterbirds* **27**: 31-34.
- 217 Cullen JM (1957) Plumage, age and mortality in the Arctic tern. *Bird Study* **4**: 197-207.
- 218 Furness RW (1996) Family Stercorariidae (Skuas). in *Handbook of the birds of the world. Vol. 3. Hoatzin to auks*. (ed. del Hoyo J, Elliott A, Saragatal J) p. 556-571. Lynx edicions: Barcelona.
- 219 Elmberg J (1992) Cooperative nest defence by trios of arctic skuas *Stercorarius parasiticus*. *Ibis* **134**: 298.
- 220 Gaston AJ, Jones IL (1998) *The auks (Alcidae)*. Oxford University Press: Oxford.
- 221 Wanless S, Harris MP (1985) Two cases of guillemots *Uria aalge* helping to rear neighbours' chicks on the Isle of May. *Seabird* **8**: 5-8.
- 222 Tschanz B (1979) Helfer-Beziehungen bei Trottellummen. *Zeitschrift für Tierpsychologie* **49**: 10-34.
- 223 Kober K, Gaston AJ (2003) Social interactions among breeding Bruennich's guillemots *Uria lomvia* suggest constraints in relation to offspring vulnerability. *Ibis* **145**: 413-418.
- 224 Grimes J, Logan C (2001) Nest attendants in parakeet auklets. *Zoo Biology* **20**: 271-277.
- 225 Maclean GL (1996) Family Glareolidae (Coursers and pratincoles). in *Handbook of the birds of the world. Vol. 3. Hoatzin to auks*. (ed. del Hoyo J, Elliott A, Saragatal J) p. 364-383. Lynx edicions: Barcelona.
- 226 Rands MRW (1996) Family Dromadidae (Crab plover). in *Handbook of the birds of the world. Vol. 3. Hoatzin to auks*. (ed. del Hoyo J, Elliott A, Saragatal J) p. 302-307. Lynx edicions: Barcelona.
- 227 Piersma T, Wiersma T (1996) Family Charadriidae (Plovers). in *Handbook of the birds of the world. Vol. 3. Hoatzin to auks*. (ed. del Hoyo J, Elliott A, Saragatal J) p. 384-443. Lynx edicions: Barcelona.
- 228 Wallander J, Blomqvist D, Lifjeld JT (2001) Genetic and social monogamy - does it occur without mate guarding in the ringed plover? *Ethology* **107**: 561-572.
- 229 Walters J, Walters BF (1980) Co-operative breeding by southern lapwings *Vanellus chilensis*. *Ibis* **122**: 505-509.
- 230 Knystautas AJ (1996) Family Ibisbillidae (Ibisbill). in *Handbook of the birds of the world. Vol. 3. Hoatzin to auks*. (ed. del Hoyo J, Elliott A, Saragatal J) p. 326-331. Lynx edicions: Barcelona.

- 231 Pierce RJ (1996) Family Recurvirostridae (Stilts and Avocets). in *Handbook of the birds of the world. Vol. 3. Hoatzin to auks.* (ed. del Hoyo J, Elliott A, Saragatal J) p. 332-347. Lynx edicions: Barcelona.
- 232 Heg D, van Treuren R (1998) Female-female cooperation in polygynous oystercatchers. *Nature* **391**: 687-691.
- 233 Hockey PAR (1996) Family Haematopodidae (Oystercatchers). in *Handbook of the birds of the world. Vol. 3. Hoatzin to auks.* (ed. del Hoyo J, Elliott A, Saragatal J) p. 308-325. Lynx edicions: Barcelona.
- 234 Nol E, Humphrey RC (1994) American oystercatcher. in *Birds of North America: Life Histories for the Twenty-First Century.* (ed. Poole A, Stettenheim P, Gill F) p. 1-24. American Ornithologist's Union and Academy of Natural Sciences, Philadelphia: Washington, D.C.
- 235 Chapman BR (1983) An apparent instance of communal nesting by American oystercatchers. *Wilson Bulletin* **94**: 584.
- 236 Lauro B, Nol E, Vicari M (1992) Nesting density and communal breeding in American oystercatchers. *Condor* **94**: 286-289.
- 237 Hume RA (1996) Family Burhinidae (Thick-knees). in *Handbook of the birds of the world. Vol. 3. Hoatzin to auks.* (ed. del Hoyo J, Elliott A, Saragatal J) p. 348-363. Lynx edicions: Barcelona.
- 238 Burger AE (1996) Family Chionidae (Sheathbills). in *Handbook of the birds of the world. Vol. 3. Hoatzin to auks.* (ed. del Hoyo J, Elliott A, Saragatal J) p. 546-555. Lynx edicions: Barcelona.
- 239 Fisher PR, Newton SF, Tatwany HMA, Goldspink CR (2001) The status and breeding biology of the osprey *Pandion haliaetus* in the Middle East. *Vogelwelt* **122**: 191-204.
- 240 Poole AF (1994) Family Pandionidae (Osprey). in *Handbook of the birds of the world. Vol. 2. New world vultures to guineafowl.* (ed. del Hoyo J, Elliott A, Saragatal J) p. 42-51. Lynx edicions: Barcelona.
- 241 Ferguson-Lees J, Christie DA (2001) *Raptors of the world.* Christopher Helm: London.
- 242 Steiner H (1997) Ein Trio beim Wespenbussard (*Pernis apivorus*). *Egretta* **40**: 45-47.
- 243 Marchant S, Higgins PJ, eds. (1993) *Handbook of Australian, New Zealand and Antarctic Birds. Volume 2. Raptors to lapwings.* Oxford University Press: Melbourne.
- 244 Sykes PW, Rodgers JA, Bennetts RE (1995) Snail kite. in *Birds of North America: Life Histories for the Twenty-First Century.* (ed. Poole A, Stettenheim P, Gill F) p. 1-32. American Ornithologist's Union and Academy of Natural Sciences, Philadelphia: Washington, D.C.
- 245 Parker JW, Ports M (1982) Helping at the nest by yearling Mississippi kites. *Raptor Research* **16**: 14-17.
- 246 Kimball RT, Parker PG, Bednarz JC (2003) Occurrence and evolution of cooperative breeding among the diurnal raptors (Accipitridae and Falconidae). *Auk* **120**: 717-729.
- 247 Thiollay JM, White CM, Bierregard RO, Orta J, Meyburg BU, Kemp AC, Clark WS, Debus SJS (1994) Family Accipitridae (Hawks and Eagles). in *Handbook of the birds of the world. Vol. 2. New world vultures to guineafowl.* (ed. del Hoyo J, Elliott A, Saragatal J) p. 52-205. Lynx edicions: Barcelona.
- 248 Tingay RE, Culver M, Hallerman EM, Fraser JD, Watson RT (2002) Subordinate males sire offspring in Madagascar fish-eagle (*Haliaeetus vociferoides*) polyandrous breeding groups. *Journal of Raptor Research* **36**: 280-286.
- 249 Hopkins DA, Mersereau GS, Nordell AC (1999) A third adult again assists at a Connecticut bald eagle nest. *Connecticut Warbler* **19**: 26-27.
- 250 Garcelon DK, Slater GL, Danilson CD, Helm RC (1995) Cooperative nesting by a trio of bald eagles. *Journal of Raptor Research* **29**: 210-213.

- 251 Bertran J, Margalida A (2002) Social organization of a trio of bearded vultures (*Gypaetus barbatus*): sexual and parental roles. *Journal of Raptor Research* **36**: 66-70.
- 252 Heredia R, Donazar JA (1990) High frequency of polyandrous trios in an endangered population of lammergeiers *Gypaetus barbatus* in northern Spain. *Biological Conservation* **53**: 163-171.
- 253 Margalida A, Garcia D, Bertran J (1997) A possible case of a polyandrous quartet in the bearded vulture (*Gypaetus barbatus*). *Ardeola* **44**: 109-111.
- 254 Margalida A, Bertran J (2002) First replacement clutch by a polyandrous trio of bearded vultures (*Gypaetus barbatus*) in the Spanish Pyrenees. *Journal of Raptor Research* **36**: 154-155.
- 255 Tella JL (1993) Polyandrous trios in a population of Egyptian vultures (*Neophron percnopterus*). *Journal of Raptor Research* **27**: 119-120.
- 256 Perennou C, Fily M, Cantournet D (1987) Note sur un cas de polyandrie chez le Vautour percnoptere *Neophron percnopterus*. *Alauda* **55**: 73-75.
- 257 Brown LH (1982) Accipitridae, Osprey, cuckoo falcons, honey buzzards, kites, fish eagles, Old World vultures, snake eagles, harroers, hawks, buzzards and eagles. in *Birds of Africa Volume 1*. (ed. Brown LH, Urban EK, Newman K) p. 294-436. Academic Press: London.
- 258 Buczek T (1994) [An unusual case of breeding cooperation in the marsh harrier (*Circus aeruginosus*)]. *Notatki Ornitologiczne* **35**: 321-329.
- 259 Tryjanowski P, Winięcki A (1995) Polyandrie bei Weißen (*Circus spec.*). *Ornithologische Mitteilungen* **47**: 75.
- 260 Simmons R, Barnard P, MacWhirter B, Hansen GL (1986) The influence of microtines on polygyny, productivity, age and provisioning of breeding northern harriers: a 5-year study. *Canadian Journal of Zoology* **64**: 2447-2456.
- 261 Arroyo B (1996) A possible case of polyandry in Montagu's harrier. *Journal of Raptor Research* **30**: 100-102.
- 262 Arroyo BE, Garcia JT (2002) Alloparental care and kleptoparasitism in the semicolonial Montagu's harrier *Circus pygargus*. *Ibis* **144**: 676-679.
- 263 Cormier JP (1990) Un cas d'aide à l'élevage des jeunes de la part d'un mâle de deux ans chez le busard cendré *Circus pygargus* (L.). *Alauda* **58**: 203-204.
- 264 Malan G, Jenkins AR (1996) Territory and nest defence in polyandrous pale chanting goshawks: do co-breeders help? *South African Journal of Zoology* **31**: 170-176.
- 265 Bos J, van Kooten T (1993) Brood sharing of two female sparrowhawks *Accipter nisus*. *Limosa* **66**: 161-163.
- 266 Boal CW, Spaulding RL (2000) Helping at a Cooper's hawk nest. *Wilson Bulletin* **112**: 275-277.
- 267 Bednarz JC, Ligon JD (1988) A study of the ecological bases of cooperative breeding in the Harris' hawk. *Ecology* **69**: 1176-1187.
- 268 Dawson JW, Mannan RW (1991) Dominance hierarchies and helper contributions in Harris' hawks. *Auk* **108**: 649-660.
- 269 Dawson JW, Mannan RW (1991) The role of territoriality in the social organization of Harris' hawks. *Auk* **108**: 661-672.
- 270 Pavez EF (2001) Breeding biology of the black-chested eagle *Geranoaetus melanoleucus* (Aves: Accipitridae) in central Chile. *Revista Chilena de Historia Natural* **74**: 687-697.

- 271 England AS, Bechard MJ, Houston CS (1997) Swainson's hawk. in *Birds of North America: Life Histories for the Twenty-First Century*. (ed. Poole A, Stettenheim P, Gill F) p. 1-28. American Ornithologist's Union and Academy of Natural Sciences, Philadelphia: Washington, D.C.
- 272 Faaborg J, Parker PG, DeLay L, de Vries T, Bednarz JC, Paz SM, Naranjo J, Waite TA (1995) Confirmation of cooperative polyandry in the Galapagos hawk (*Buteo galapagoensis*). *Behavioral Ecology and Sociobiology* **36**: 83-90.
- 273 DeLay LS, Faaborg J, Naranjo J, Paz SM, de Vries T, Parker PG (1996) Paternal care in the cooperatively polyandrous Galapagos hawk. *Condor* **98**: 300-311.
- 274 Allan D (2000) Jackal buzzards crowded house. *Africa Birds & Birding* **5**: 64-69.
- 275 Salvo G (1993) Probabile caso di collaborazione nella riproduzione da parte di un'aquila reale, *Aquila chrysaetos*, immatura. *Rivista Italiana di Ornitologia* **63**: 102-103.
- 276 Bergo G (1988) Trios in the golden eagle *Aquila chrysaetos* (L.). *Fauna Norvegica Series C Cinclus* **11**: 40-44.
- 277 Domingo M (1995) Poliandria en l'aliga perdiuera *Hieraetus fasciatus*. *Butlletí del Grup Català d'Anellament* **11**: 83084.
- 278 Kemp AC (1994) Family Sagittaridae (Secretarybird). in *Handbook of the birds of the world. Vol. 2. New world vultures to guineafowl*. (ed. del Hoyo J, Elliott A, Saragatal J) p. 206-215. Lynx edicions: Barcelona.
- 279 White CM, Olsen PD, Kiff LF (1994) Family Falconidae (Falcons and caracaras). in *Handbook of the birds of the world. Vol. 2. New world vultures to guineafowl*. (ed. del Hoyo J, Elliott A, Saragatal J) p. 216-277. Lynx Edicions: Barcelona.
- 280 Griffiths CS, Barrowclough GF, Groth JG, Mertz L (2004) Phylogeny of the Falconidae (Aves): a comparison of the efficacy of morphological, mitochondrial, and nuclear data. *Molecular Phylogenetics and Evolution* **32**: 101-109.
- 281 Kemp A, Van Zyl A (1998) Co-operative breeding by collared falconets *Microhierax caerulescens*. *Forktail* **13**: 131-132.
- 282 Spottiswoode C, Herrmann E, Rasa OAE, Sapsford CW (2004) Co-operative breeding in the pygmy falcon *Polihierax semitorquatus*. *Ostrich* **75**: 322-324.
- 283 Thomsett S (1991) Polyandrous pygmy falcons? *Gabar* **6**: 73.
- 284 Cordero PJ, Aparico JM, Parkin DT (2002) Genetic evidence of alloparental care of a female lesser kestrel in an alien nest. *Journal of Raptor Research* **36**: 70-73.
- 285 Harper D (1991) Two male kestrels at same nest. *British Birds* **84**: 221-222.
- 286 Packham C (1985) Bigamy by the kestrel. *British Birds* **78**: 194.
- 287 Cosnette BL (1991) Apparent bigamy in merlins and co-operation of two females with large young. *North-East Scotland Bird Report* **1991**: 74-75.
- 288 James PC, Oliphant LW (1986) Extra birds and helpers at the nests of Richardson's merlin. *Condor* **88**: 533-534.
- 289 Zuberogoitia I, Martinez JA, Azkona A, Iraeta A, Castillo I, Alonso R, Hidalgo S (2003) Two cases of cooperative breeding in Eurasian hobbies. *Journal of Raptor Research* **37**: 342-344.
- 290 Steenhof K (1998) Prairie falcon. in *Birds of North America: Life Histories for the Twenty-First Century*. (ed. Poole A, Stettenheim P, Gill F) p. 1-28. American Ornithologist's Union and Academy of Natural Sciences, Philadelphia: Washington, D.C.

- 291 Monneret RJ (1983) L'aide a l'elevage chez le faucon pelerin. *Alauda* **51**: 241-250.
- 292 Walker DG (1987) Nest-help and possible polygyny by peregrines. *British Birds* **80**: 113.
- 293 Kurosawa T, Kurosawa R (2003) A helper at the nest of peregrine falcons in northern Japan. *Journal of Raptor Research* **37**: 340-342.
- 294 Thiollay JM (1991) Foraging, home range use and social behaviour of a group-living rainforest raptor, the red-throated caracara *Daptrius americanus*. *Ibis* **133**: 382-393.
- 295 Jones J (1999) Cooperative foraging in the mountain caracara in Peru. *Wilson Bulletin* **111**: 437-439.
- 296 Fjeldså J (2004) *The Grebes: Podicipedidae*. Oxford University Press: Oxford.
- 297 Lane R (1978) Co-operative breeding in the Australian little grebe. *Sunbird* **9**: 2.
- 298 Forbes MRL (1987) Extrapair feeding in pied-billed grebes. *Wilson Bulletin* **99**: 109-111.
- 299 Muller MJ, Storer RW (1999) Pied-billed grebe. in *Birds of North America: Life Histories for the Twenty-First Century*. (ed. Poole A, Stettenheim P, Gill F) p. 1-32. American Ornithologist's Union and Academy of Natural Sciences, Philadelphia: Washington, D.C.
- 300 Stout BE, Nuechterlein GL (1999) Red-necked grebe. in *Birds of North America: Life Histories for the Twenty-First Century*. (ed. Poole A, Stettenheim P, Gill F) p. 1-32. American Ornithologist's Union and Academy of Natural Sciences, Philadelphia: Washington, D.C.
- 301 Chance GR (2002) Double broods and sibling helpers in the Australasian crested grebe (*Podiceps cristatus australis*). *Notornis* **49**: 123-124.
- 302 Gipson P, Orton R (1992) First-brood juvenile great crested grebe 'helping' second-brood chicks. *British Birds* **85**: 376-377.
- 303 Lambe RP (1988) Three great crested grebes building a nesting platform. *British Birds* **81**: 233-235.
- 304 Waterbolk JN (1990) [Young of great crested grebe as nest helper.]. *Vogeljaar* **38**: 31.
- 305 Stedman SJ (2000) Horned grebe. in *Birds of North America: Life Histories for the Twenty-First Century*. (ed. Poole A, Stettenheim P, Gill F) p. 1-28. American Ornithologist's Union and Academy of Natural Sciences, Philadelphia: Washington, D.C.
- 306 Cullen SA, Jehl JR, Nuechterlein GL (1999) Eared grebe. in *Birds of North America: Life Histories for the Twenty-First Century*. (ed. Poole A, Stettenheim P, Gill F) p. 1-27. American Ornithologist's Union and Academy of Natural Sciences, Philadelphia: Washington, D.C.
- 307 Storer RW, Nuechterlein GL (1992) Western grebe. Clark's grebe. in *Birds of North America: Life Histories for the Twenty-First Century*. (ed. Poole A, Stettenheim P, Gill F) p. 1-22. American Ornithologist's Union and Academy of Natural Sciences, Philadelphia: Washington, D.C.
- 308 Orta J (1992) Family Phaethonidae (Tropicbirds). in *Handbook of the birds of the world. Vol. 1. Ostrich to ducks*. (ed. del Hoyo J, Elliott A, Saragatal J) p. 280-289. Lynx edicions: Barcelona.
- 309 Carboneras C (1992) Family Sulidae (Gannets and Boobies). in *Handbook of the birds of the world. Vol. 1. Ostrich to ducks*. (ed. del Hoyo J, Elliott A, Saragatal J) p. 312-325. Lynx edicions: Barcelona.
- 310 Orta J (1992) Family Anhingidae (Darters). in *Handbook of the birds of the world. Vol. 1. Ostrich to ducks*. (ed. del Hoyo J, Elliott A, Saragatal J) p. 354-361. Lynx edicions: Barcelona.

- 311 Brown LH (1982) Anhingidae (darters). in *Birds of Africa Volume 1*. (ed. Brown LH, Urban EK, Newman K) p. 120-121. Academic Press: London.
- 312 Orta J (1992) Family Phalacrocoracidae (Cormorants). in *Handbook of the birds of the world. Vol. 1. Ostrich to ducks*. (ed. del Hoyo J, Elliott A, Saragatal J) p. 326-353. Lynx edicions: Barcelona.
- 313 Hobson KA (1997) Pelagic cormorant. in *Birds of North America: Life Histories for the Twenty-First Century*. (ed. Poole A, Stettenheim P, Gill F) p. 1-28. American Ornithologist's Union and Academy of Natural Sciences, Philadelphia: Washington, D.C.
- 314 Kushlan JA, Hancock JA (2005) *Hérons*. Oxford University Press: Oxford.
- 315 Gentis S (1976) Cooperative nest building in hamerkops. *Honeyguide* **88**: 48.
- 316 Elliott A (1992) Family Scopidae (Hamerkop). in *Handbook of the birds of the world. Vol. 1. Ostrich to ducks*. (ed. del Hoyo J, Elliott A, Saragatal J) p. 430-435. Lynx edicions: Barcelona.
- 317 del Hoyo J (1992) Family Phoenicopteridae (Flamingoes). in *Handbook of the birds of the world. Vol. 1. Ostrich to ducks*. (ed. del Hoyo J, Elliott A, Saragatal J) p. 508-527. Lynx edicions: Barcelona.
- 318 Matheu E, del Hoyo J (1992) Family Threskiornithidae (Ibises and spoonbills). in *Handbook of the birds of the world. Vol. 1. Ostrich to ducks*. (ed. del Hoyo J, Elliott A, Saragatal J) p. 472-507. Lynx edicions: Barcelona.
- 319 Elliott A (1992) Family Balaenicipitidae (Shoebill). in *Handbook of the birds of the world. Vol. 1. Ostrich to ducks*. (ed. del Hoyo J, Elliott A, Saragatal J) p. 466-471. Lynx edicions: Barcelona.
- 320 Elliott A (1992) Family Pelecanidae (Pelicans). in *Handbook of the birds of the world. Vol. 1. Ostrich to ducks*. (ed. del Hoyo J, Elliott A, Saragatal J) p. 290-311. Lynx edicions: Barcelona.
- 321 Houston DC (1994) Family Cathartidae (New World vultures). in *Handbook of the birds of the world. Vol. 2. New world vultures to guineaowl*. (ed. del Hoyo J, Elliott A, Saragatal J) p. 24-41. Lynx edicions: Barcelona.
- 322 Hancock JA, Kushlan JA, Kahl MP (1992) *Storks, ibises and spoonbills of the world*. Academic Press: London.
- 323 Datta T, Pal BC (1995) Polygyny in the Asian openbill (*Anastomus oscitans*). *Auk* **112**: 257-260.
- 324 Orta J (1992) Family Fregatidae (Frigatebirds). in *Handbook of the birds of the world. Vol. 1. Ostrich to ducks*. (ed. del Hoyo J, Elliott A, Saragatal J) p. 362-375. Lynx edicions: Barcelona.
- 325 Williams TD (1995) *The Penguins: Spheniscidae*. Oxford University Press: Oxford.
- 326 Tamiya Y, Aoyanagi M (1982) The significance of reoccupation by non-breeding birds in the Adelie penguin *Pygoscelis adeliae* during their incubation, guard and creche periods. *Journal of the Yamashina Institute for Ornithology* **14**: 35-44.
- 327 Carboneras C (1992) Family Gaviidae (Divers). in *Handbook of the birds of the world. Vol. 1. Ostrich to ducks*. (ed. del Hoyo J, Elliott A, Saragatal J) p. 162-173. Lynx edicions: Barcelona.
- 328 Carboneras C (1992) Family Procellariidae (Petrels and Shearwaters). in *Handbook of the birds of the world. Vol. 1. Ostrich to ducks*. (ed. del Hoyo J, Elliott A, Saragatal J) p. 216-257. Lynx edicions: Barcelona.
- 329 Carboneras C (1992) Family Pelecanoididae (Diving-petrels). in *Handbook of the birds of the world. Vol. 1. Ostrich to ducks*. (ed. del Hoyo J, Elliott A, Saragatal J) p. 272-279. Lynx edicions: Barcelona.
- 330 Carboneras C (1992) Family Diomedidae (Albatrosses). in *Handbook of the birds of the world. Vol. 1. Ostrich to ducks*. (ed. del Hoyo J, Elliott A, Saragatal J) p. 198-215. Lynx edicions: Barcelona.

- 331 Carboneras C (1992) Family Hydrobatidae (Storm-petrels). in *Handbook of the birds of the world. Vol. 1. Ostrich to ducks.* (ed. del Hoyo J, Elliott A, Saragatal J) p. 258-271. Lynx edicions: Barcelona.
- 332 Higgins PJ, Peter JM, Steele WK, eds. (2001) *Handbook of Australian, New Zealand and Antarctic Birds. Volume 5: Tyrant-flycatchers to Chats.* Oxford University Press: Melbourne.
- 333 Barker FK, Barrowclough GF, Groth JG (2002) A phylogenetic hypothesis for passerine birds: taxonomic and biogeographic implications of an analysis of nuclear DNA sequence data. *Proceedings of the Royal Society of London Series B-Biological Sciences* **269**: 295-308.
- 334 Ericson PGP, Christidis L, Cooper A, Irestedt M, Jackson JA, Johansson US, Norman JA (2002) A Gondwanan origin of passerine birds supported by DNA sequences of the endemic New Zealand wrens. *Proceedings of the Royal Society Biological Sciences Series B* **269**: 235-241.
- 335 Lambert F, Woodcock M (1996) *Pittas, broadbills and asities.* Pica: Sussex.
- 336 Zimmerman UM, Noske RA (2003) Breeding biology of the rainbow pitta, *Pitta iris*, a species endemic to Australian monsoon-tropical rainforests. *Emu* **103**: 245-254.
- 337 Bruce MD (2003) Family Eurylaimidae (Broadbills). in *Handbook of the birds of the world. Vol. 8. Broadbills to tapaculos.* (ed. del Hoyo J, Elliott A, Christie D) p. 54-93. Lynx edicions: Barcelona.
- 338 Snow DW (2004) Family Pipridae (Manakins). in *Handbook of the birds of the world. Vol. 9. Cotingas to pipits and wagtails.* (ed. del Hoyo J, Elliott A, Christie D) p. 110-169. Lynx edicions: Barcelona.
- 339 Fjeldsø J, Zuccon M, Irestedt M, Johansson US, Ericson PGB (2003) *Sapayoa aenigma*: a New World representative of 'Old World suboscines. *Proceedings of the Royal Society Biological Sciences Series B* **270**: S238-S241.
- 340 Hawkins AFA (2003) Family Philepittidae (Asities). in *Handbook of the birds of the world. Vol. 8. Broadbills to tapaculos.* (ed. del Hoyo J, Elliott A, Christie D) p. 94-105. Lynx edicions: Barcelona.
- 341 Prum RO, Razafindratsita VR (1997) Lek behavior and natural history of the velvet asity (*Philepitta castanea*: Eurylaimidae). *Wilson Bulletin* **109**: 371-392.
- 342 Krabbe NK, Schulenberg TS (2003) Family Rhinocryptidae (Tapaculos). in *Handbook of the birds of the world. Vol. 8. Broadbills to tapaculos.* (ed. del Hoyo J, Elliott A, Christie D) p. 748-788. Lynx edicions: Barcelona.
- 343 Ericson PGB, Irestedt M, Johansson US (2003) Evolution, biogeography, and patterns of diversification in passerine birds. *Journal of Avian Biology* **34**: 3-15.
- 344 Chesser RT (2004) Molecular systematics of New World suboscine birds. *Molecular Phylogenetics and Evolution* **32**: 11-24.
- 345 Whitney BM (2003) Family Conopophagidae (Gnateaters). in *Handbook of the birds of the world. Vol. 8. Broadbills to tapaculos.* (ed. del Hoyo J, Elliott A, Christie D) p. 732-747. Lynx edicions: Barcelona.
- 346 Zimmer KJ, Isler ML (2003) Family Thamnophilidae (Typical Antbirds). in *Handbook of the birds of the world. Vol. 8. Broadbills to tapaculos.* (ed. del Hoyo J, Elliott A, Christie D) p. 448-681. Lynx edicions: Barcelona.
- 347 Armacost JW (2004) The nest, eggs, and nestlings of the Castelnau's antshrike (*Thamnophilus cryptoleucus*), with notes on its ecology and conservation. *Wilson Bulletin* **116**: 262-266.
- 348 Buehler DM, Castillo AI, Brawn JD (2004) First nest description for the ocellated antbird (*Phaenostictus mcleannani*). *Wilson Bulletin* **116**: 277-279.
- 349 Krabbe NK, Schulenberg TS (2003) Family Formicariidae (Ground-antbirds). in *Handbook of the birds of the world. Vol. 8. Broadbills to tapaculos.* (ed. del Hoyo J, Elliott A, Christie D) p. 682-731. Lynx edicions: Barcelona.
- 350 Remsen JV, Jr. (2003) Family Furnariidae (Ovenbirds). in *Handbook of the birds of the world. Vol. 8. Broadbills to tapaculos.* (ed. del Hoyo J, Elliott A, Christie D) p. 162-357. Lynx edicions: Barcelona.

- 351 Marantz CA, Aleixo A, Bevier LR, Patten MA (2003) Family Dendrocolaptidae (Woodcreepers). in *Handbook of the birds of the world. Vol. 8. Broadbills to tapaculos*. (ed. del Hoyo J, Elliott A, Christie D) p. 358-447. Lynx edicions: Barcelona.
- 352 Willis EO, Oniki Y (1995) On *Dendrocincla tyrannina*: morphology, behavior and conservation of a shy lek-type insectivore. *Caldasia* **18**: 131-140.
- 353 Vega Riviera JH, Ayala D, Haas CA (2003) Home range size, habitat use, and reproduction of the ivory-billed woodcreeper (*Xiphorhynchus flavigaster*) in dry forest of western Mexico. *Journal of Field Ornithology* **74**: 136-140.
- 354 Moreno J, Merino S, Vasquez RA, Armesto JJ (2005) Breeding biology of the thorn-tailed rayadito (Furnariidae) in south-temperate rainforests of Chile. *Condor* **107**: 69-77.
- 355 Rodrigues M, Carrara LA (2004) Co-operative breeding in the rufous-fronted thornbird *Phacellodomus rufifrons*: a Neotropical ovenbird. *Ibis* **146**: 351-354.
- 356 Fraga RA (1979) Helpers at the nest in passerines from Buenos Aires Province. *Auk* **96**: 608.
- 357 Masmaron DO (1971) Contribucion al estudio de las aves de San Luis. *El Hornero* **11**: 113-123.
- 358 Whitney BM, Pacheco JF, da Fonseca PSM, Barth RH, Jr. (1996) The nest and nesting ecology of *Acrobatornis fonsecai* (Furnariidae), with implications for intrafamilial relationships. *Wilson Bulletin* **108**: 434-448.
- 359 Zimmer KJ, Whittaker A (2000) The rufous cacholote (Furnariidae : *Pseudoseisura*) is two species. *Condor* **102**: 409-422.
- 360 Nores AI, Nores M (1994) Nest building and nesting behaviour of the brown cacholote. *Wilson Bulletin* **106**: 106-120.
- 361 Hudson WH (1920) *Birds of La Plata Volume I*. Dutton: New York.
- 362 Snow DW (2004) Family Cotingidae (Cotingas). in *Handbook of the birds of the world. Vol. 9. Cotingas to pipits and wagtails*. (ed. del Hoyo J, Elliott A, Christie D) p. 32-109. Lynx edicions: Barcelona.
- 363 Snow D (1982) *The cotingas: bellbirds, umbrellabirds and their allies*. British Museum (Natural History) & Oxford University Press: Oxford.
- 364 Samper K C (1992) Courtship feeding in the orange-breasted fruit-eater *Pipreola jucunda*. *Bulletin of the British Ornithologists' Club* **112**: 133-134.
- 365 Lopez-Lanus B (2000) Display and mechanical sound in dusky piha *Lipaugus fuscocinereus*. *Cotinga* **13**: 44-45.
- 366 Willis EO, Oniki Y (1998) One-parent nesting in cinnamon-vented pihás (*Lipaugus lanioides*, Cotinginae, Tyrannidae). *Ornitologia Neotropical* **9**: 129-159.
- 367 Walther BA (2004) Genus *Phytotoma*. in *Handbook of the birds of the world. Vol. 9. Cotingas to pipits and wagtails*. (ed. del Hoyo J, Elliott A, Christie D) p. 73-74. Lynx edicions: Barcelona.
- 368 Brooke MdL (2004) Genus *Oxyruncus*. in *Handbook of the birds of the world. Vol. 9. Cotingas to pipits and wagtails*. (ed. del Hoyo J, Elliott A, Christie D) p. 73. Lynx edicions: Barcelona.
- 369 Fitzpatrick JW, Bates JM, Bostwick KS, Caballero IC, Clock BM, Farnsworth A, Hosner PA, Joseph L, Langham GM, Lebbin DJ, Mobley JA, Robbins MB, Scholes E, Tello JG, Walther BA, Zimmer KJ (2004) Family Tyrannidae (Tyrant-flycatchers). in *Handbook of the birds of the world. Vol. 9. Cotingas to pipits and wagtails*. (ed. del Hoyo J, Elliott A, Christie D) p. 110-169. Lynx edicions: Barcelona.
- 370 Hilty SL, Brown WL (1986) *A guide to the birds of Colombia*. Princeton University Press: Princeton.



- 371 Skutch AF (1969) *Life histories of Central American Birds III Families Cotingidae, Pipridae, Formicariidae, Furnariidae, Dendrocolaptidae, and Picidae*. Cooper Ornithological Society: Berkeley.
- 372 Marini MA, Cavalcini RB (1993) Foraging behavior, diet, and possible monogamy of a sexually dichromatic manakin, *Antilopha galeata*. *Auk* **109**: 911-913.
- 373 Martin TE (2005) personal communication.
- 374 Westcott D, Smith JNM (1997) Lek size variation and its consequences in the ochre-bellied flycatcher, *Mionectes oleagineus*. *Behavioral Ecology* **8**: 396-403.
- 375 Westcott DA, Smith JNM (1994) Behavior and social organization during the breeding season in *Mionectes oleagineus*, a lekking flycatcher. *Condor* **96**: 672-683.
- 376 Willis EO, Wechsler D, Oniki Y (1978) On the behaviour and nesting of McConnell's flycatcher (*Pipromorpha macconnelli*): does female rejection lead to male promiscuity? *Auk* **95**: 1-8.
- 377 Moore RT (1944) Nesting of the brown-capped leucopogon in Mexico. *Condor* **46**: 6-8.
- 378 Skutch AF (1967) Life histories of central American highland birds. *Publications of the Nuttall Ornithological Club* **7**: 1-213.
- 379 Barnett JM, Kirwan GM, Pearman M, Naka LN, Tobias JA (2000) Rediscovery and subsequent observations of Kaempfer's tody-tyrant *Hemitriccus kaempferi* in Santa Catarina, Brazil, with notes on conservation, life history and plumage. *Bird Conservation International* **10**: 371-379.
- 380 Collar NJ, Gonzaga LP, Krabbe N, Madroño NA, Naranjo LG, Parker TA, Wege DC (1992) *Threatened birds of the Americas. The ICBP/IUCN Red Data Book. 3rd ed, part 2*. Smithsonian Institution Press: Washington DC.
- 381 Skutch AF (1960) *Life histories of Central American Birds II Families Vireonidae, Sylviidae, Turdidae, Troglodytidae, Paridae, Corvidae, Hirundinidae and Tyrannidae*. Cooper Ornithological Society: Berkeley.
- 382 Haverschmidt F (1978) The duration of parental care in the common tody flycatcher. *Auk* **95**: 199.
- 383 Woltmann S (2004) Group roosting behavior of yellow tyrannulets (*Capsiempis flaveola*). *Wilson Bulletin* **116**: 352-354.
- 384 Fjeldså J, Krabbe N (1990) *Birds of the high Andes*. University of Copenhagen and Apollo Books: Svenborg.
- 385 Fraga RM (1984) Notas sobre la conducta y nidificación de la mosqueta *Myiophobus fasciatus* en Buenos Aires, Argentina. *Hornero* **12**: 96-106.
- 386 Skutch AF (1981) New studies of tropical American birds. *Publications of the Nuttall Ornithological Club* **19**: 1-281.
- 387 Altman B, Sallabanks R (2000) Olive-sided flycatcher. in *Birds of North America: Life Histories for the Twenty-First Century*. (ed. Poole A, Stettenheim P, Gill F) p. 1-28. American Ornithologist's Union and Academy of Natural Sciences, Philadelphia: Washington, D.C.
- 388 Chace JF, Tweit RC (1999) Greater pewee. in *Birds of North America: Life Histories for the Twenty-First Century*. (ed. Poole A, Stettenheim P, Gill F) p. 1-12. American Ornithologist's Union and Academy of Natural Sciences, Philadelphia: Washington, D.C.
- 389 Bemis C, Rising JD (1999) Western wood-pewee. in *Birds of North America: Life Histories for the Twenty-First Century*. (ed. Poole A, Stettenheim P, Gill F) p. 1-20. American Ornithologist's Union and Academy of Natural Sciences, Philadelphia: Washington, D.C.
- 390 McCarty JP (1996) Eastern wood-pewee. in *Birds of North America: Life Histories for the Twenty-First Century*. (ed. Poole A, Stettenheim P, Gill F) p. 1-20. American Ornithologist's Union and Academy of Natural Sciences, Philadelphia: Washington, D.C.

- 391 Gross DA, Lowther PE (2001) Yellow-bellied flycatcher. in *Birds of North America: Life Histories for the Twenty-First Century*. (ed. Poole A, Stettenheim P, Gill F) p. 1-20. American Ornithologist's Union and Academy of Natural Sciences, Philadelphia: Washington, D.C.
- 392 Whitehead DR, Taylor T (2002) Acadian woodpecker. in *Birds of North America: Life Histories for the Twenty-First Century*. (ed. Poole A, Stettenheim P, Gill F) p. 1-24. American Ornithologist's Union and Academy of Natural Sciences, Philadelphia: Washington, D.C.
- 393 Lowther PE (1999) Alder flycatcher. in *Birds of North America: Life Histories for the Twenty-First Century*. (ed. Poole A, Stettenheim P, Gill F) p. 1-20. American Ornithologist's Union and Academy of Natural Sciences, Philadelphia: Washington, D.C.
- 394 Sedgwick JA (2000) Willow flycatcher. in *Birds of North America: Life Histories for the Twenty-First Century*. (ed. Poole A, Stettenheim P, Gill F) p. 1-32. American Ornithologist's Union and Academy of Natural Sciences, Philadelphia: Washington, D.C.
- 395 Briskie JV (1994) Least flycatcher. in *Birds of North America: Life Histories for the Twenty-First Century*. (ed. Poole A, Stettenheim P, Gill F) p. 1-24. American Ornithologist's Union and Academy of Natural Sciences, Philadelphia: Washington, D.C.
- 396 Sedgwick JA (1994) Hammond's flycatcher. in *Birds of North America: Life Histories for the Twenty-First Century*. (ed. Poole A, Stettenheim P, Gill F) p. 1-16. American Ornithologist's Union and Academy of Natural Sciences, Philadelphia: Washington, D.C.
- 397 Sterling JC (1999) Gray flycatcher. in *Birds of North America: Life Histories for the Twenty-First Century*. (ed. Poole A, Stettenheim P, Gill F) p. 1-16. American Ornithologist's Union and Academy of Natural Sciences, Philadelphia: Washington, D.C.
- 398 Sedgwick JA (1993) Dusky flycatcher. in *Birds of North America: Life Histories for the Twenty-First Century*. (ed. Poole A, Stettenheim P, Gill F) p. 1-20. American Ornithologist's Union and Academy of Natural Sciences, Philadelphia: Washington, D.C.
- 399 Lowther PE (2000) Pacific-slope flycatcher. Cordilleran flycatcher. in *Birds of North America: Life Histories for the Twenty-First Century*. (ed. Poole A, Stettenheim P, Gill F) p. 1-24. American Ornithologist's Union and Academy of Natural Sciences, Philadelphia: Washington, D.C.
- 400 Bowers RK, Dunning JB (1994) Buff-breasted flycatcher. in *Birds of North America: Life Histories for the Twenty-First Century*. (ed. Poole A, Stettenheim P, Gill F) p. 1-12. American Ornithologist's Union and Academy of Natural Sciences, Philadelphia: Washington, D.C.
- 401 Hams MJ (1994) Eastern phoebe. in *Birds of North America: Life Histories for the Twenty-First Century*. (ed. Poole A, Stettenheim P, Gill F) p. 1-20. American Ornithologist's Union and Academy of Natural Sciences, Philadelphia: Washington, D.C.
- 402 Schukman JM, Wolf BO (1998) Say's phoebe. in *Birds of North America: Life Histories for the Twenty-First Century*. (ed. Poole A, Stettenheim P, Gill F) p. 1-20. American Ornithologist's Union and Academy of Natural Sciences, Philadelphia: Washington, D.C.
- 403 Wolf BO (1997) Black phoebe. in *Birds of North America: Life Histories for the Twenty-First Century*. (ed. Poole A, Stettenheim P, Gill F) p. 1-20. American Ornithologist's Union and Academy of Natural Sciences, Philadelphia: Washington, D.C.
- 404 Mezquida ET (2002) Nidificación de ocho especies de Tyrannidae en La Reserva de Ñacuñáñ, Mendoza, Argentina. *Hornero* **17**: 31-40.
- 405 Wolf BO, Jones SL (2000) Vermilion flycatcher. in *Birds of North America: Life Histories for the Twenty-First Century*. (ed. Poole A, Stettenheim P, Gill F) p. 1-16. American Ornithologist's Union and Academy of Natural Sciences, Philadelphia: Washington, D.C.
- 406 Vuilleumier F (1994) Nesting behavior, distribution, and speciation of Patagonian and Andean ground tyrants (*Myiotheretes*, *Xolmis*, *Neoxolmis*, *Agriornis*, and *Muscisaxicola*). *Ornitología Neotropical* **5**: 1-55.
- 407 Cobos V, Miatello R (2001) Description of the nest, egg, and chick of the salinas monjita (*Neoxolmis salinarum*). *Hornero* **16**: 47-48.
- 408 Fontana CS (1994) História natural de *Heteroxolmis dominicana* (Vieillot, 1823) (Aves: Tyrannidae) com ênfase na relação ecológica com *Xanthopsar flavus* (Gmelin, 1788) (Aves Icteridae), no nordeste do Rio Grande do Sul, Brasil. thesis. Pontifícia Universidade Católica do Rio Grande do Sul, PUCRS.
- 409 Fontana CS, Joenck CM, Mahler JKF, Jr. (2000) Description of the nest and eggs of the shear-tailed gray-tyrant (*Muscipipra vetula*) and considerations on its historical ecology implications. *Ornitología Neotropical* **11**: 169-172.
- 410 Tweit RC, Tweit JC (2002) Dusky-capped flycatcher. in *Birds of North America: Life Histories for the Twenty-First Century*. (ed. Poole A, Stettenheim P, Gill F) p. 1-20. American Ornithologist's Union and Academy of Natural Sciences, Philadelphia: Washington, D.C.

- 411 Kattan GH, Alvarez-Lopez H, Gomez N, Cruz L (2000) Notes on the nesting biology of the apical flycatcher, a Colombian endemic. *Journal of Field Ornithology* **71**: 612-618.
- 412 Cardiff SW, Dittmann DL (2002) Ash-throated flycatcher. in *Birds of North America: Life Histories for the Twenty-First Century*. (ed. Poole A, Stettenheim P, Gill F) p. 1-32. American Ornithologist's Union and Academy of Natural Sciences, Philadelphia: Washington, D.C.
- 413 Simpkin JL, Gubanich AA (1991) Ash-throated flycatchers (*Myiarchus cinerascens*) raise mountain bluebird (*Sialia currucoides*) young. *Condor* **93**: 461-462.
- 414 Lanyon WE (1997) Great crested flycatcher. in *Birds of North America: Life Histories for the Twenty-First Century*. (ed. Poole A, Stettenheim P, Gill F) p. 1-20. American Ornithologist's Union and Academy of Natural Sciences, Philadelphia: Washington, D.C.
- 415 Cardiff SW, Dittmann DL (2000) Brown-chested flycatcher. in *Birds of North America: Life Histories for the Twenty-First Century*. (ed. Poole A, Stettenheim P, Gill F) p. 1-28. American Ornithologist's Union and Academy of Natural Sciences, Philadelphia: Washington, D.C.
- 416 Ervin S (1992) Nesting behavior of the large-billed flycatcher on Isla Santa Cruz. *Noticias de Galapagos* **51**: 17-19.
- 417 Marchant S (1960) The breeding of some S.W. Ecuadorian birds. *Ibis* **102**: 349-382, 584-599.
- 418 Stouffer PC, Chesser RT (1998) Tropical kingbird. in *Birds of North America: Life Histories for the Twenty-First Century*. (ed. Poole A, Stettenheim P, Gill F) p. 1-20. American Ornithologist's Union and Academy of Natural Sciences, Philadelphia: Washington, D.C.
- 419 Brush T (1999) Couch's kingbird. in *Birds of North America: Life Histories for the Twenty-First Century*. (ed. Poole A, Stettenheim P, Gill F) p. 1-12. American Ornithologist's Union and Academy of Natural Sciences, Philadelphia: Washington, D.C.
- 420 Tweit RC, Tweit JC (2000) Cassin's kingbird. in *Birds of North America: Life Histories for the Twenty-First Century*. (ed. Poole A, Stettenheim P, Gill F) p. 1-20. American Ornithologist's Union and Academy of Natural Sciences, Philadelphia: Washington, D.C.
- 421 Lowther PE (2002) Thick-billed kingbird. in *Birds of North America: Life Histories for the Twenty-First Century*. (ed. Poole A, Stettenheim P, Gill F) p. 1-12. American Ornithologist's Union and Academy of Natural Sciences, Philadelphia: Washington, D.C.
- 422 Gamble LR, Bergin TM (1996) Western kingbird. in *Birds of North America: Life Histories for the Twenty-First Century*. (ed. Poole A, Stettenheim P, Gill F) p. 1-20. American Ornithologist's Union and Academy of Natural Sciences, Philadelphia: Washington, D.C.
- 423 Regosin JV (1998) Scissor-tailed flycatcher. in *Birds of North America: Life Histories for the Twenty-First Century*. (ed. Poole A, Stettenheim P, Gill F) p. 1-20. American Ornithologist's Union and Academy of Natural Sciences, Philadelphia: Washington, D.C.
- 424 Rowe DL, Murphy MT, Fleischer RC, Wolf PG (2001) High frequency of extra-pair paternity in eastern kingbirds. *Condor* **103**: 845-851.
- 425 Murphy MT (1996) Eastern kingbird. in *Birds of North America: Life Histories for the Twenty-First Century*. (ed. Poole A, Stettenheim P, Gill F) p. 1-24. American Ornithologist's Union and Academy of Natural Sciences, Philadelphia: Washington, D.C.
- 426 Smith GA, Jackson JA (2002) Gray kingbird. in *Birds of North America: Life Histories for the Twenty-First Century*. (ed. Poole A, Stettenheim P, Gill F) p. 1-20. American Ornithologist's Union and Academy of Natural Sciences, Philadelphia: Washington, D.C.
- 427 Lowther PE, Stotz DF (2000) Sulphur-bellied flycatcher. in *Birds of North America: Life Histories for the Twenty-First Century*. (ed. Poole A, Stettenheim P, Gill F) p. 1-12. American Ornithologist's Union and Academy of Natural Sciences, Philadelphia: Washington, D.C.
- 428 Ricklefs RE (1980) 'Watch-dog' behaviour observed at the nest of a cooperative breeding bird, the rufous-margined flycatcher *Myiozetetes cayanensis*. *Ibis* **122**: 116-118.
- 429 Dyrzc A (2002) Breeding ecology of the social (*Myiozetetes similis*) and Rusty-margined (*M. cayanensis*) flycatchers at Barro Colorado Island, Republic of Panama. *Ornitologia Neotropical* **13**: 143-151.
- 430 Dyrzc A (2000) Observations at nests of the lesser kiskadee (*Philohydor lictor*) on Barro Colorado Island (Republic of Panama). *Ornitologia Neotropical* **11**: 359-362.

- 431 Brush T, Fitzpatrick JW (2002) Great kiskadee. in *Birds of North America: Life Histories for the Twenty-First Century*. (ed. Poole A, Stettenheim P, Gill F) p. 1-20. American Ornithologist's Union and Academy of Natural Sciences, Philadelphia: Washington, D.C.
- 432 Thomas BT (1979) Behavior and breeding of the white-bearded flycatcher (*Conopias inornata*). *Auk* **96**: 767-775.
- 433 Barker FK, Cibois A, Schikler P, Feinstein J, Cracraft J (2004) Phylogeny and diversification of the largest avian radiation. *Proceedings of the National Academy of Sciences of the United States of America* **101**: 11040-11045.
- 434 Coates BJ (1990) *The birds of Papua New Guinea including the Bismarck Archipelago and Bougainville. Vol. II. Passerines*. Dove Publications: Alderley, Queensland.
- 435 Frith CB, Frith DW (2004) *The bowerbirds Ptilonorhynchidae*. Oxford University Press: Oxford.
- 436 Kusmierski R, Borgia G, Crozier RH, Chan BY (1993) Molecular information on bowerbird phylogeny and the evolution of exaggerated male characteristics. *Journal of evolutionary biology* **6**: 737-752.
- 437 Rowley I, Russell E (1997) *Fairy-wrens and Grasswrens: Maluridae*. Oxford University Press: Oxford.
- 438 Maguire GS, Mulder RA (2004) Breeding biology and demography of the southern emu-wren (*Stipiturus malachurus*). *Australian Journal of Zoology* **52**: 583-604.
- 439 Noske RA (1992) The status and ecology of the white-throated grasswren *Amytornis woodwardi*. *Emu* **92**: 39-51.
- 440 Karubian J (2001) The social organization and mating system of the striated grasswren. *Condor* **103**: 412-417.
- 441 Freeman DJ (1970) The rediscovery of the black grass wren *Amytornis housei* with additional notes on the species. *Emu* **70**: 193-195.
- 442 Driskell AC, Christidis L (2003) Phylogeny and evolution of Australo-Papuan honeyeaters (Passeriformes, Meliphagidae). *Molecular Phylogenetics and Evolution* **31**: 943-960.
- 443 Tyson D (1993) Co-operative feeding of young in two species of honeyeater. *Wingspan* **9**: 29.
- 444 Christy MT (1995) Co-operative care in the singing honeyeater *Lichenostomus virescens*. *Corella* **19**: 115-117.
- 445 BirdLife International (2000) *Threatened birds of the world*. Lynx Edicions & Bird Life International: Barcelona & Cambridge.
- 446 Coates BJ, Bishop KD, Gardner D (1997) *A guide to the birds of Wallacea: Sulawesi, the Moluccas and Lesser Sunda Islands, Indonesia*. Dove Publications: Alderley, Queensland.
- 447 Hannecart F, Letocart Y (1980) *Oiseaux de Nouvelle Calédonie et des Loyautés. Tome 1 Volume 1*. Les Editions Cardinalis: Noumea.
- 448 Craig RJ (1996) Seasonal population surveys and natural history of a Micronesian bird community. *Wilson Bulletin* **108**: 246-267.
- 449 Bregulla H (1992) *Birds of Vanuatu*. Anthony Nelson: Shropshire.
- 450 Watling D (2001) *A guide to the birds of Fiji and Western Polynesia, including American Samoa, Niue, Samoa, Tokelau, Tonga, Tuvalu and Wallis & Futuna*. Environmental Consultants (Fiji): Suva.

- 451 Diamond J, Pimm SL, Gilpin ME, LeCroy M (1989) Rapid evolution of character displacement in myzomelid honeyeaters. *American Naturalist* **134**: 675-708.
- 452 Diamond J (2002) Dispersal, mimicry, and geographic variation in Northern Melanesian birds. *Pacific Science* **56**: 1-22.
- 453 Noske RA (1983) Communal behaviour of brown-headed honeyeaters. *Emu* **83**: 38-41.
- 454 Moffatt JD, Whitmore MJ, Date EM (1983) Communal breeding by striped honeyeaters. *Emu* **83**: 202-203.
- 455 Collar NJ, Andreev AV, Chan S, Crosby MJ, Surbramanya S, Tobias JA (2001) *Threatened birds of Asia: The Bird Life International Red Data Book Part B*. Bird Life International: Cambridge.
- 456 Castro I, Minot EO, Fordham RA, Birkhead TR (1996) Polygynandry, face-to-face copulation and sperm competition in the hihi *Notiomystis cincta* (Aves: Meliphagidae). *Ibis* **138**: 765-771.
- 457 Frith CB, Beehler BM (1998) *The Birds of Paradise: Paradisaeidae*. Oxford University Press: Oxford.
- 458 Cracraft J, Feinstein J (2000) What is not a bird of paradise? Molecular and morphological evidence places *Macgregoria* in the Meliphagidae and the Cnemophilinae near the base of the corvoid tree. *Proceedings of the Royal Society Biological Sciences Series B* **267**: 233-241.
- 459 Higgins PJ, Peter JM, eds. (2002) *Handbook of Australian, New Zealand and Antarctic Birds. Volume 6. Pardalotes to Figbird*. Oxford University Press: Melbourne.
- 460 Magrath RD, Whittingham LA (1997) Subordinate males are more likely to help if unrelated to the breeding female in cooperatively breeding white-browed scrubwrens. *Behavioral Ecology and Sociobiology* **41**: 185-192.
- 461 Magrath RD, Leedman AW, Gardner JL, Giannasca A, Nathan AC, Yezerinac SM, Nicholls JA (2000) Life in the slow lane: reproductive life history of the white-browed scrubwren, an Australian endemic. *Auk* **117**: 479-489.
- 462 Nicholls JA, Double MC, Rowell DM, Magrath RD (2000) The evolution of cooperative and pair breeding in thornbills *Acanthiza* (Pardalotidae). *Journal of Avian Biology* **31**: 165-176.
- 463 Gardner JL (2002) Breeding biology of the speckled warbler, *Chthonicola sagittata*. *Australian Journal of Zoology* **50**: 169-181.
- 464 Gardner JL, Magrath RD, Kokko H (2003) Stepping stones of life: Natal dispersal in the group-living but noncooperative speckled warbler. *Animal Behaviour* **66**: 521-530.
- 465 Nicholls JA (2003) Co-operative breeding in the mountain thornbill *Acanthiza katherina*. *Corella* **27**: 23.
- 466 Green DJ, Cockburn A (1999) Life history and demography of an uncooperative Australian passerine, the brown thornbill. *Australian Journal of Zoology* **47**: 633-649.
- 467 Lord Medway, Wells D (1976) *The birds of the Malay peninsula: a general account of the birds inhabiting the region from the isthmus of Kra to Singapore with the adjacent islands. V: Conclusion, and survey of every species*. HF & G Witherby: Hertfordshire.
- 468 Kennedy RS, Gonzales PC, Dickinson EC, Miranda HC, Fisher TH (2000) *A guide to the birds of the Phillipines*. Oxford University Press: Oxford.
- 469 Noske RA (2001) The breeding biology of the mangrove gerygone, *Gerygone laevigaster*, in the Darwin region, with notes on brood parasitism by the little bronze-cuckoo, *Chrysococcyx minutillus*. *Emu* **101**: 129-135.
- 470 Mackness B (1976) A helper at the nest of the brown warbler. *Sunbird* **7**: 79.

- 471 Hannecart F, Letocart Y (1980) Donnees sur la reproduction de *Gerygone flavolateralis*. *Oiseau et la Revue Francaise d'Ornithologie* **50**: 65-68.
- 472 Green DJ (2002) personal communication.
- 473 Frith CB, Frith DW, Jansen A (1997) Nesting biology of the chowchilla *Orthonyx spaldingii*. *Emu* **97**: 18-30.
- 474 Jansen A (1999) Home ranges and group-territoriality in chowchillas *Orthonyx spaldingii*. *Emu* **99**: 280-290.
- 475 Robertson CJR (1985) *Complete book of New Zealand birds*. Reader's Digest: Sydney.
- 476 Lack D (1968) *Ecological adaptations for breeding in birds*. Chapman & Hall: London.
- 477 Cibois A, Kalyakin MK, Lian-Xuan H, Pasquet E (2002) Molecular phylogenetics of babblers (Timaliidae): reevaluation of the genera *Yuhina* and *Stachyris*. *Journal of Avian Biology* **33**: 380-390.
- 478 Howell SNG, Webb S (1995) *A guide to the birds of Mexico and northern Central America*. Oxford University Press: Oxford.
- 479 Cicero C, Johnson NK (2001) Higher-level phylogeny of New World vireos (Aves: Vireonidae) based on sequences of multiple mitochondrial genes. *Molecular Phylogenetics and Evolution* **20**: 27-40.
- 480 Stiles FG, Skutch AF (1989) *A guide to the birds of Costa Rica*. Cornell University Press: Ithaca.
- 481 Ridgley RS, Tudor G (1989) *The birds of South America. Vol. I. The oscine passerines*. Oxford University Press: Oxford.
- 482 French R (1973) *A guide to the birds of Trinidad and Tobago*. Livingstone: Pennsylvania.
- 483 Stewart BG, Carter WA, Tyler JD (1988) Third known nest of the slaty vireo, *Vireo brevipennis* (Vireonidae), in Colima, Mexico. *Southwestern Naturalist* **33**: 252-253.
- 484 Brown BT (1993) Bell's vireo. in *Birds of North America: Life Histories for the Twenty-First Century*. (ed. Poole A, Stettenheim P, Gill F) p. 1-20. American Ornithologist's Union and Academy of Natural Sciences, Philadelphia: Washington, D.C.
- 485 Grzybowski JA (1995) Black-capped vireo. in *Birds of North America: Life Histories for the Twenty-First Century*. (ed. Poole A, Stettenheim P, Gill F) p. 1-24. American Ornithologist's Union and Academy of Natural Sciences, Philadelphia: Washington, D.C.
- 486 Davis JN (1995) Hutton's vireo. in *Birds of North America: Life Histories for the Twenty-First Century*. (ed. Poole A, Stettenheim P, Gill F) p. 1-20. American Ornithologist's Union and Academy of Natural Sciences, Philadelphia: Washington, D.C.
- 487 Hopp SL, Kirby A, Boone CA (2000) White-eyed vireo. in *Birds of North America: Life Histories for the Twenty-First Century*. (ed. Poole A, Stettenheim P, Gill F) p. 1-20. American Ornithologist's Union and Academy of Natural Sciences, Philadelphia: Washington, D.C.
- 488 Garrido OH, Kirkconnell A (2000) *Birds of Cuba*. Comstock: Ithaca, New York.
- 489 Barlow JC, Nash SV (1985) Behavior and nesting biology of the St. Andrew vireo. *Wilson Bulletin* **97**: 265-72.
- 490 Barlow JC, Leckie SN, Baril CT (1999) Gray vireo. in *Birds of North America: Life Histories for the Twenty-First Century*. (ed. Poole A, Stettenheim P, Gill F) p. 1-23. American Ornithologist's Union and Academy of Natural Sciences, Philadelphia: Washington, D.C.

- 491 Raffaele H, Wiley J, Garrido O, Keith A, Raffaele J (1998) *Birds of the West Indies*. Christopher Helm: London.
- 492 Woodworth BL, Faaborg J, Arendt WJ (1999) Survival and longevity of the Puerto Rican vireo. *Wilson Bulletin* **111**: 376-380.
- 493 Baicich PJ (1997) *A guide to the nests, eggs and nestlings of North American birds. 2nd ed.* Academic Press: San Diego.
- 494 Curson DR, Goguen CB (1998) Plumbeous vireo (*Vireo plumbeus*). in *Birds of North America: Life Histories for the Twenty-First Century*. (ed. Poole A, Stettenheim P, Gill F) p. 1-19. American Ornithologist's Union and Academy of Natural Sciences, Philadelphia: Washington, D.C.
- 495 James RD (1998) Blue-headed vireo *Vireo solitarius*. in *Birds of North America: Life Histories for the Twenty-First Century*. (ed. Poole A, Stettenheim P, Gill F) p. 1-24. American Ornithologist's Union and Academy of Natural Sciences, Philadelphia: Washington, D.C.
- 496 Rodewald PG, James RD (1996) Yellow-throated vireo. in *Birds of North America: Life Histories for the Twenty-First Century*. (ed. Poole A, Stettenheim P, Gill F) p. 1-20. American Ornithologist's Union and Academy of Natural Sciences, Philadelphia: Washington, D.C.
- 497 James RD (1996) Philadelphia vireo. in *Birds of North America: Life Histories for the Twenty-First Century*. (ed. Poole A, Stettenheim P, Gill F) p. 1-12. American Ornithologist's Union and Academy of Natural Sciences, Philadelphia: Washington, D.C.
- 498 Cimprich DA, Moore FR, Guilfoyle MP (2000) Red-eyed vireo. in *Birds of North America: Life Histories for the Twenty-First Century*. (ed. Poole A, Stettenheim P, Gill F) p. 1-24. American Ornithologist's Union and Academy of Natural Sciences, Philadelphia: Washington, D.C.
- 499 Olson SL (1994) The endemic vireo of Fernando de Noronha (*Vireo gracilirostris*). *Wilson Bulletin* **106**: 1-17.
- 500 Barlow JC, Bortolotti GR (1986) Adaptive divergence in morphology and behavior in some New World island birds, with special reference to *Vireo altiloquus*. in *Acta 19 Congressus Internationalis Ornithologici. Vol. 2.* (ed. Ouellet H) p. 1535-1549: Ottawa.
- 501 Gardali T, Ballard G (2000) Warbling vireo. in *Birds of North America: Life Histories for the Twenty-First Century*. (ed. Poole A, Stettenheim P, Gill F) p. 1-27. American Ornithologist's Union and Academy of Natural Sciences, Philadelphia: Washington, D.C.
- 502 Taylor PB (2005) Family Campephagidae (Cuckoo-shrikes). in *Handbook of the birds of the world. Vol. 10. Cuckoo-shrikes to thrushes.* (ed. del Hoyo J, Elliott A, Christie D) p. 40-122. Lynx edicions: Barcelona.
- 503 Keith S, Urban EK, Fry CH, eds. (1992) *The birds of Africa Vol IV.* Academic Press: London.
- 504 Bell HL (1982) Are the cuckoo-shrikes *Coracina boyeri*, *C. melaena* and *Campochaera sloetii* cooperative breeders. *PNG Bird Society Newsletter* **191-192**: 8-11.
- 505 Rane U (1984) Unusual communal nest-feeding in southern small minivet *Pericrocotus cinnamomeus cinnamomeus* Linne. *Journal of the Bombay Natural History Society* **81**: 473-474.
- 506 Clapp GE (1994) The nest of the mottled whistler (*Rhagologus leucostigma*). *Muruk* **6**: 16.
- 507 Rogers AC, Mulder RA (2004) Breeding ecology and social biology of an antiphonal duetter, the eastern whipbird (*Psophodes olivaceus*). *Australian Journal of Zoology* **52**: 417-435.
- 508 Robson C (2000) *A field guide to the birds of south-east Asia*. New Holland: London.
- 509 Clapp GE (1993) The nest and nestling of the crested berrypecker *Paramythia montium*. *Muruk* **6**: 43.
- 510 Strahan R (1996) *Finches, bowerbirds and other passerines*. Angus & Robertson: Sydney.

- 511 Cramp S, Perrins CM, eds. (1993) *The birds of the western Palearctic Vol. VII. Flycatchers to shrikes*. Oxford University Press: Oxford.
- 512 Fry CH, Keith S, Urban EK, eds. (2000) *The Birds of Africa Vol VI*. Academic Press: London.
- 513 Ali S, Ripley SD (1972) *Handbook of the birds of India and Pakistan. Vol. 7. Laughing thrushes to the mangrove whistler*. Oxford University Press: Bombay.
- 514 Ali S, Ripley SD (1972) *Handbook of the birds of India and Pakistan. Vol. 5. Larks to the grey hypocolius*. Oxford University Press: Bombay.
- 515 Woodall PF (1980) Communal breeding in the figbird. *Sunbird* **11**: 73-75.
- 516 Rowley I (1976) Co-operative breeding in Australian birds. in *Proceedings of the 16th International Ornithological Congress*. (ed. Frith HJ, Calaby JH) p. 657-666. Australian Academy of Science: Canberra.
- 517 Finn PG, Hughes JM (2001) Helping behaviour in Australian magpies, *Gymnorhina tibicen*. *Emu* **101**: 57-63.
- 518 Clunie F (1976) Behaviour and nesting of Fijian white-breasted woodswallows. *Notornis* **20**: 378-380.
- 519 Rowley I (1999) Co-operative breeding by black-faced woodswallows *Artamus cinereus*. *Corella* **23**: 63-66.
- 520 Rowley I (2000) Cooperative breeding by dusky woodswallows. *Canberra Bird Notes* **25**: 49-58.
- 521 Witt CC, Sheldon FH (1994) A review of the status and distribution of the Bornean bristlehead. *Kukila* **7**: 54-67.
- 522 Harris T, Franklin K (2000) *Shrikes and bush-shrikes including wood-shrikes, helmet-shrikes, flycatcher-shrikes, philentomas, batises and wattle-eyes*. Christopher Helm: London.
- 523 Fuchs J, Bowie RCK, Fjeldså J, Pasquet E (2004) Phylogenetic relationships of the African bush-shrikes and helmet-shrikes (Passeriformes: Malaconotidae). *Molecular Phylogenetics and Evolution* **33**: 428-439.
- 524 Urban EK, Fry CH, Keith S, eds. (1997) *The birds of Africa Vol V*. Academic Press: London.
- 525 Langrand O (1990) *Guide to the birds of Madagascar*. Yale University Press: New Haven.
- 526 Eguchi K, Yamagishi S, Asai S, Nagata H, Hino T (2002) Helping does not enhance reproductive success of cooperatively breeding rufous vanga in Madagascar. *Journal of Animal Ecology* **71**: 123-130.
- 527 Yamagishi S, Urano E, Eguchi K (1995) Group composition and contributions to breeding by rufous vangas *Schetba rufa* in Madagascar. *Ibis* **137**: 157-161.
- 528 Asai S, Yamagishi S, Eguchi K (2003) Mortality of fledgling females causes male bias in the sex ratio of rufous vangas (*Schetba rufa*) in Madagascar. *Auk* **120**: 700-705.
- 529 Rakotomanana H, Nakamura M, Yamagishi S (2001) Breeding ecology of the endemic hook-billed vanga, *Vanga curvirostris*, in Madagascar. *Journal of the Yamashina Institute for Ornithology* **33**: 25-35.
- 530 Mizuta T, Nakamura M, Yamagishi S (2001) Breeding ecology of Van Dam's vanga *Xenopirostris damii*, an endemic species in Madagascar. *Journal of the Yamashina Institute for Ornithology* **33**: 15-24.



- 531 Putnam MS (1996) Aspects of the breeding biology of Pollen's vanga (*Xenopirostris polleni*) in southeastern Madagascar. *Auk* **113**: 233-236.
- 532 Nakamura M, Yamagishi S, Nishiumi I (2001) Cooperative breeding of the white-headed vanga *Leptopterus viridis*, an endemic species in Madagascar. *Journal of the Yamashina Institute for Ornithology* **33**: 1-14.
- 533 Eguchi K, Amano HE, Yamagishi S (2001) Roosting, range use and foraging behaviour of the sickle-billed vanga, *Falcula palliata*, in Madagascar. *Ostrich* **72**: 127-133.
- 534 Appert O (1970) Zur biologie der Vangawürger (Vangidae) Südwest-Madagaskars. *Ornithologische Beobachter* **67**: 101-133.
- 535 Thorstrom R, Rene de Roland L-A (2001) First nest descriptions, nesting biology and food habits for Bernier's vanga, *Oriolia bernieri*, in Madagascar. *Ostrich* **72**: 165-168.
- 536 La Marca G, Thorstrom R (2000) Breeding biology, diet and vocalization of the helmet vanga, *Euryceros prevostii*, on the Masoala Peninsula, Madagascar. *Ostrich* **71**: 400-403.
- 537 Harris T, Arnott G (1988) *The shrikes of southern Africa*. Struik Winchester: Cape Town.
- 538 Wells DR (2005) Family Aegithidae (Ioras). in *Handbook of the birds of the world. Vol. 10. Cuckoo-shrikes to thrushes*. (ed. del Hoyo J, Elliott A, Christie D) p. 278-290. Lynx edicions: Barcelona.
- 539 Skerrett A, Bullock I, Disley T (2001) *Birds of the Seychelles*. Princeton University Press: Princeton.
- 540 Lovett R, Lovett V (2001) Defence of nest site by a group of fork-tailed drongos *Dicrurus adsimilis*. *Babbler* **38**: 23.
- 541 Thangamani A, Paramanandham K, Johnsingh AJT (1981) 'Helpers' among the black drongo (*Dicrurus adsimilis*). *Journal of the Bombay Natural History Society* **78**: 602-603.
- 542 Boles WE (1988) *The robins and flycatchers of Australia*. Angus & Robertson: North Ryde.
- 543 Heinsohn R, Dunn P, Legge S, Double M (2000) Coalitions of relatives and reproductive skew in cooperatively breeding white-winged choughs. *Proceedings of the Royal Society Biological Sciences Series B* **267**: 243-249.
- 544 Rowley I (1978) Communal activities among white-winged choughs *Corcorax melanorhamphos*. *Ibis* **120**: 178-97.
- 545 Woxvold IA (2004) Breeding ecology and group dynamics of the apostlebird. *Australian Journal of Zoology* **52**: 561-581.
- 546 Pasquet E, Cibois A, Baillon F, Erard C (2002) What are African monarchs (Aves, Passeriformes)? A phylogenetic analysis of mitochondrial genes. *Comptes Rendus Biologies* **325**: 107-118.
- 547 Mulder RA (2002) personal communication.
- 548 Mulder RA, Ramiarison R, Emahalala RE (2002) Ontogeny of male plumage dichromatism in Madagascar paradise flycatchers *Terpsiphone mutata*. *Journal of Avian Biology* **33**: 342-348.
- 549 Cheke AS (1987a) The ecology of the smaller land birds of Mauritius. in *Studies on Mascarene Birds*. (ed. Diamond AW) p. 151-207. Cambridge University Press: Cambridge.
- 550 Mizuta T, Yamagishi S (1998) Breeding biology of monogamous Asian paradise flycatcher *Terpsiphone paradisi* (Aves: Monarchinae): a special reference to colour dimorphism and exaggerated long tails in male. *Raffles Bulletin of Zoology* **46**: 101-112.

- 551 Mizuta T (1998) The breeding biology of the black paradise flycatcher *Terpsiphone atrocaudata*. *Japanese Journal of Ornithology* **47**: 25-28.
- 552 Vanderwerf EA (1998) 'Elepaio. in *Birds of North America: Life Histories for the Twenty-First Century*. (ed. Poole A, Stettenheim P, Gill F) p. 1-24. American Ornithologist's Union and Academy of Natural Sciences, Philadelphia: Washington, D.C.
- 553 Saul EK, Robertson HA, Tiraa A (1998) Breeding biology of the kakerori (*Pomarea dimidiata*) on Rarotonga, Cook Islands. *Notornis* **45**: 255-269.
- 554 Thibault J-C, Meyer J-Y (2001) Contemporary extinctions and population declines of the monarchs (*Pomarea* spp.) in French Polynesia, South Pacific. *Oryx* **35**: 73-80.
- 555 Lusk M, Hess S, Reynolds M, Johnston S (2000) Population status of the Tinian monarch (*Monarcha takatsukasae*) on Tinia, Commonwealth of the Northern Mariana Islands. *Micronesica* **32**: 181-190.
- 556 Frith C, Frith D, Watling D (1989) Notes on the nesting, parental care, and taxonomy of the silktail (*Lamprolia victoriae*) of Fiji. *Notornis* **36**: 96-98.
- 557 Hall ML, Magrath RD (2000) Duetting and mate-guarding in Australian magpie-larks (*Grallina cyanoleuca*). *Behavioral Ecology and Sociobiology* **47**: 180-187.
- 558 Lefranc N, Worfolk T (1997) *Shrikes: a guide to shrikes of the world*. Pica Press: Sussex.
- 559 Madge S, Burn H (1994) *Crows and jays: a guide to the crows, jays and magpies of the world*. Christopher Helm: London.
- 560 Ericson PGB, Jansén A-L, Johansson US, Ekman J (2005) Inter-generic relationships of the crows, magpies and allied groups (Aves:Corvidae) based on nucleotide sequence data. *Journal of Avian Biology* **36**: 222-234.
- 561 Severinghaus LL (1987) Flocking and cooperative breeding of Formosan blue magpie. *Bulletin of the Institute of Zoology, Academia Sinica* **26**: 27-37.
- 562 Tarvin KA, Woolfenden GE (1999) Blue jay. in *Birds of North America: Life Histories for the Twenty-First Century*. (ed. Poole A, Stettenheim P, Gill F) p. 1-32. American Ornithologist's Union and Academy of Natural Sciences, Philadelphia: Washington, D.C.
- 563 Peterson AT, Burt DB (1992) Phylogenetic history of social evolution and habitat use in the *Aphelocoma* jays. *Animal Behaviour* **44**: 859-866.
- 564 Curry RL, Peterson AT, Langen TA (2002) Western scrub-jay. in *Birds of North America: Life Histories for the Twenty-First Century*. (ed. Poole A, Stettenheim P, Gill F) p. 1-36. American Ornithologist's Union and Academy of Natural Sciences, Philadelphia: Washington, D.C.
- 565 Woolfenden GE, Fitzpatrick JW (1984) *The Florida Scrub Jay: Demography of a cooperative-breeding bird*. Princeton University Press: Princeton.
- 566 Webber T, Brown JL (1994) Natural history of the unicolorated jay. *Proc. Western Found. Vert. Zool.* **5**: 135-160.
- 567 Hornbuckle J (2001) Costa Rica trip report. [http://worldtwitch.virtualave.net/costa\\_rica\\_jh.htm](http://worldtwitch.virtualave.net/costa_rica_jh.htm).
- 568 Amaral MF, Macedo RHF (2003) Breeding patterns and habitat use in the endemic curl-crested jay of central Brazil. *Journal of Field Ornithology* **74**: 331-340.
- 569 Bosque C, Molina C (2002) Communal breeding and nest defense behavior of the cayenne jay (*Cyanocorax cayanus*). *Journal of Field Ornithology* **73**: 360-2.
- 570 Gayou DC (1995) Green jay. in *Birds of North America: Life Histories for the Twenty-First Century*. (ed. Poole A, Stettenheim P, Gill F) p. 1-12. American Ornithologist's Union and Academy of Natural Sciences, Philadelphia: Washington, D.C.

- 571 Langen TA (1996) The mating system of the white-throated magpie-jay *Calocitta formosa* and Greenwood's hypothesis for sex-biased dispersal. *Ibis* **138**: 506-513.
- 572 Ishida K, Takashi M, Ueta M (1998) A breeding record of Lidth's jay in a nest box at a natural forest of Kinsakubaru on Amami Island. *Strix* **16**: 148-151.
- 573 Ekman J, Bylin A, Tegelstrom H (2000) Parental nepotism enhances survival of retained offspring in the Siberian jay. *Behavioral Ecology* **11**: 416-420.
- 574 Jing Y, Sun Y-H, Fang Y (2003) Notes on the natural history of the Sichuan jay (*Perisoreus internigrans*). *Chinese Journal of Zoology* **38**: 91-92.
- 575 Waite TA, Strickland D (1997) Cooperative breeding in gray jays: philopatric offspring provision juvenile siblings. *Condor* **99**: 523-525.
- 576 Reynolds MD (1995) Yellow-billed magpie. in *Birds of North America: Life Histories for the Twenty-First Century*. (ed. Poole A, Stettenheim P, Gill F) p. 1-20. American Ornithologist's Union and Academy of Natural Sciences, Philadelphia: Washington, D.C.
- 577 Londei T (2005) The conspicuous bill coloration in the piapiac *Ptilostomus afer*: an infant signal from aggressive helpers? *Journal of Field Ornithology* **76**: 90-93.
- 578 Kenward BJ, Rutz C, Weir AAS, Chappell J, Kacelnik A (2004) Morphology and sexual dimorphism of the New Caledonian crow *Corvus moneduloides*, with notes on its behaviour and ecology. *Ibis* **146**: 652-660.
- 579 Verbeek NAM, Butler RW (1999) Northwestern crow. in *Birds of North America: Life Histories for the Twenty-First Century*. (ed. Poole A, Stettenheim P, Gill F) p. 1-24. American Ornithologist's Union and Academy of Natural Sciences, Philadelphia: Washington, D.C.
- 580 Verbeek NAM, Caffrey C (2002) American crow. in *Birds of North America: Life Histories for the Twenty-First Century*. (ed. Poole A, Stettenheim P, Gill F) p. 1-36. American Ornithologist's Union and Academy of Natural Sciences, Philadelphia: Washington, D.C.
- 581 McGowan KJ (2001) Fish crow: *Corvus ossifragus*. in *Birds of North America: Life Histories for the Twenty-First Century*. (ed. Poole A, Stettenheim P, Gill F) p. 1-27. American Ornithologist's Union and Academy of Natural Sciences, Philadelphia: Washington, D.C.
- 582 Baglione V, Marcos JM, Canestrari D (2002) Cooperatively breeding groups of carrion crow (*Corvus corone corone*) in northern Spain. *Auk* **119**: 790-799.
- 583 Banko PC, Ball DL, Banko WE (2002) Hawaiian crow. in *Birds of North America: Life Histories for the Twenty-First Century*. (ed. Poole A, Stettenheim P, Gill F) p. 1-28. American Ornithologist's Union and Academy of Natural Sciences, Philadelphia: Washington, D.C.
- 584 Frith CB, Frith DW (1990) Nesting biology and relationships of the lesser melampitta *Melampitta lugubris*. *Emu* **90**: 65-73.
- 585 Cibois A, Pasquet E, Schulenberg TS (1999) Molecular systematics of the Malagasy babblers (Passeriformes: Timaliidae) and warblers (Passeriformes: Sylviidae), based on cytochrome b and 16S rRNA sequences. *Molecular Phylogenetics and Evolution* **13**: 581-595.
- 586 Legge S, Heinsohn R (1996) Cooperative breeding in hooded pitohuis *Pitohui dichrous*. *Emu* **96**: 139-140.
- 587 Bell HL (1983) A bird community of lowland rainforest in New Guinea. 5. Mixed-species feeding flocks. *Emu* **82**: 256-275.
- 588 van Balen S, Nijman V (1996) Notes on the breeding of the crested jay *Platylophus galericulatus*. *Bulletin of the British Ornithologists Club* **116**: 173-174.
- 589 Cibois A (2003) Mitochondrial DNA phylogeny of babblers (Timaliidae). *Auk* **120**: 35-54.
- 590 Holmes RT, Frauenknecht BD, Du Plessis MA (2002) Breeding system of the cape rockjumper, a South African fynbos endemic. *Condor* **104**: 188-192.

- 591 Beresford P, Barker FK, Ryan PG, Crowe TM (2005) African endemics span the tree of songbirds (Passeri): molecular systematics of several evolutionary 'enigmas'. *Proceedings of the Royal Society of London - Series B: Biological Sciences* **272**: 849-858.
- 592 Thompson HS (1998) White-necked picathartes *Picathartes gymnocephalus*: its ecology and conservation. *RSPB Conservation Review* **12**: 93-96.
- 593 Thompson HS (2004) The reproductive biology of the White-necked Picathartes *Picathartes gymnocephalus*. *Ibis* **146**: 615-622.
- 594 Thompson HS (2004) Behaviour of the white-necked picathartes *Picathartes gymnocephalus*, at nest sites prior to breeding. *Malimbus* **26**: 24-30.
- 595 Thompson HS (2001) personal communication.
- 596 Russell EM, Brown RJ, M.N. B (2004) Life history of the white-breasted robin, *Eopsaltria georgiana* (Petroicidae), in south-western Australia. *Australian Journal of Zoology* **52**: 111-145.
- 597 Gill FB, Slikas B, Sheldon FH (2005) Phylogeny of titmice (Paridae): II. Species relationships based on sequences of the mitochondrial cytochrome-b gene. *Auk* **122**: 121-143.
- 598 Harrap S, Quinn D (1996) *Tits, nuthatches and treecreepers*. Christopher Helm: London.
- 599 James HJ, Ericson PGB, Slikas B, Lei F-M, Gill FB, Olson SL (2003) *Pseudopodoces humilis*, a misclassified terrestrial tit (Paridae) of the Tibetan plateau: evolutionary consequences of shifting adaptive zones. *Ibis* **145**: 185-202.
- 600 Boix-Hinzen C, Ludwig T, Turbe A (2002) Co-operative breeding in carp's tits (*Parus carpi*). *Lanioturdus* **35**: 15-18.
- 601 Nosedal J, Ficken MS (1998) Helpers in the bridled titmouse. *Southwestern Naturalist* **43**: 279-282.
- 602 Christman BJ, Gaulin SJC (1998) Unambiguous evidence of helping at the nest in bridled titmice. *Wilson Bulletin* **110**: 567-569.
- 603 Cicero C (2000) Oak titmouse. Juniper titmouse. in *Birds of North America: Life Histories for the Twenty-First Century*. (ed. Poole A, Stettenheim P, Gill F) p. 1-28. American Ornithologist's Union and Academy of Natural Sciences, Philadelphia: Washington, D.C.
- 604 Grubb TC, Jr., Pravousudov VV (1994) Tufted titmouse. in *Birds of North America: Life Histories for the Twenty-First Century*. (ed. Poole A, Stettenheim P, Gill F) p. 1-16. American Ornithologist's Union and Academy of Natural Sciences, Philadelphia: Washington, D.C.
- 605 Mostrom AM, Curry RL, Lohr B (2002) Carolina chickadee. in *Birds of North America: Life Histories for the Twenty-First Century*. (ed. Poole A, Stettenheim P, Gill F) p. 1-28. American Ornithologist's Union and Academy of Natural Sciences, Philadelphia: Washington, D.C.
- 606 Smith SM (1993) Black-capped chickadee. in *Birds of North America: Life Histories for the Twenty-First Century*. (ed. Poole A, Stettenheim P, Gill F) p. 1-20. American Ornithologist's Union and Academy of Natural Sciences, Philadelphia: Washington, D.C.
- 607 McCallum DA, Grundel R, Dahlsten DL (1999) Mountain chickadee. in *Birds of North America: Life Histories for the Twenty-First Century*. (ed. Poole A, Stettenheim P, Gill F) p. 1-27. American Ornithologist's Union and Academy of Natural Sciences, Philadelphia: Washington, D.C.
- 608 Ficken M, Nosedal J (1992) Mexican chickadee. in *Birds of North America: Life Histories for the Twenty-First Century*. (ed. Poole A, Stettenheim P, Gill F) p. 1-12. American Ornithologist's Union and Academy of Natural Sciences, Philadelphia: Washington, D.C.
- 609 Ficken MS, McLaren MA, Hailman JP (1996) Boreal chickadee. in *Birds of North America: Life Histories for the Twenty-First Century*. (ed. Poole A, Stettenheim P, Gill F) p. 1-24. American Ornithologist's Union and Academy of Natural Sciences, Philadelphia: Washington, D.C.
- 610 Dahlsten DL, Brennan LA, McCallum DA, Gaunt SLL (2002) Chestnut-backed chickadee. in *Birds of North America: Life Histories for the Twenty-First Century*. (ed. Poole A, Stettenheim P, Gill F) p. 1-20. American Ornithologist's Union and Academy of Natural Sciences, Philadelphia: Washington, D.C.

- 611 Schleicher B, Hoi H, Valera F, Hoi-Leitner M (1997) The importance of different paternity guards in the polygynandrous penduline tit (*Remiz pendulinus*). *Behaviour* **134**: 941-959.
- 612 de Juana E, Suaréz F, Ryan PG, Alström P, Donald PF (2004) Family Alaudidae (Larks). in *Handbook of the birds of the world. Vol. 9. Cotingas to pipits and wagtails*. (ed. del Hoyo J, Elliott A, Christie D) p. 496-601. Lynx edicions: Barcelona.
- 613 Alström P, Ericson PGB, Olsson U, Sundberg P (2005) Phylogeny and classification of the avian superfamily Sylvioidea. *Molecular Phylogenetics and Evolution* doi: 10:1016/j.ympev.2005.05.015.
- 614 Steyn P (1988) Cooperative breeding in the spike-headed lark. *Ostrich* **59**: 182.
- 615 Cramp S, ed. (1988) *The birds of the western Palearctic Vol. V. Tyrant flycatchers to thrushes*. Oxford University Press: Oxford.
- 616 Beason RC (1995) Horned lark. in *Birds of North America: Life Histories for the Twenty-First Century*. (ed. Poole A, Stettenheim P, Gill F) p. 1-24. American Ornithologist's Union and Academy of Natural Sciences, Philadelphia: Washington, D.C.
- 617 Beason RC (1984) Altruism in the horned lark *Eremophila alpestris*. *Journal of Field Ornithology* **55**: 489-490.
- 618 Turner AK (2004) Family Hirundinidae (Swallows and martins). in *Handbook of the birds of the world. Vol. 9. Cotingas to pipits and wagtails*. (ed. del Hoyo J, Elliott A, Christie D) p. 602-685. Lynx edicions: Barcelona.
- 619 Sheldon FH, Whittingham LA, Moyle RG, Slikas B, Winkler DW (2005) Phylogeny of swallows (Aves: Hirundinidae) estimated from nuclear and mitochondrial DNA sequences. *Molecular Phylogenetics and Evolution* **35**: 254-270.
- 620 Du Plessis MA, Siegfried WR, Armstrong AJ (1995) Ecological and life-history correlates of cooperative breeding in South African birds. *Oecologia* **102**: 180-188.
- 621 Brown CR, Brown MB (1995) Cliff swallow. in *Birds of North America: Life Histories for the Twenty-First Century*. (ed. Poole A, Stettenheim P, Gill F) p. 1-32. American Ornithologist's Union and Academy of Natural Sciences, Philadelphia: Washington, D.C.
- 622 West S (1995) Cave swallow. in *Birds of North America: Life Histories for the Twenty-First Century*. (ed. Poole A, Stettenheim P, Gill F) p. 1-20. American Ornithologist's Union and Academy of Natural Sciences, Philadelphia: Washington, D.C.
- 623 Robertson RJ, Stutchbury BJ, Cohen RR (1992) Tree swallow. in *Birds of North America: Life Histories for the Twenty-First Century*. (ed. Poole A, Stettenheim P, Gill F) p. 1-28. American Ornithologist's Union and Academy of Natural Sciences, Philadelphia: Washington, D.C.
- 624 Brown CR, Knott AM, Damrose EJ (1992) Violet-green swallow. in *Birds of North America: Life Histories for the Twenty-First Century*. (ed. Poole A, Stettenheim P, Gill F) p. 1-12. American Ornithologist's Union and Academy of Natural Sciences, Philadelphia: Washington, D.C.
- 625 Brown CR (1997) Purple martin. in *Birds of North America: Life Histories for the Twenty-First Century*. (ed. Poole A, Stettenheim P, Gill F) p. 1-32. American Ornithologist's Union and Academy of Natural Sciences, Philadelphia: Washington, D.C.
- 626 Turner A, Rose C (1989) *A handbook to the swallows and martins of the world*. Christopher Helm: London.
- 627 Dejong MJ (1996) Northern rough-winged swallow (*Stelgidopteryx serripennis*). in *Birds of North America: Life Histories for the Twenty-First Century*. (ed. Poole A, Stettenheim P, Gill F) p. 1-24. American Ornithologist's Union and Academy of Natural Sciences, Philadelphia: Washington, D.C.
- 628 Hoag DJ (2000) An instance of helping behavior in northern rough-winged swallows. *Wilson Bulletin* **112**: 281-282.
- 629 Garrison BA (1999) Bank swallow *Riparia riparia*. in *Birds of North America: Life Histories for the Twenty-First Century*. (ed. Poole A, Stettenheim P, Gill F) p. 1-27. American Ornithologist's Union and Academy of Natural Sciences, Philadelphia: Washington, D.C.
- 630 Hatchwell BJ, Ross DJ, Chaline N, Fowlie MK, Burke TA (2002) Parentage in the cooperative breeding system of long-tailed tits, *Aegithalos caudatus*. *Animal Behaviour* **64**: 55-63.

- 631 Hatchwell BJ, Anderson C, Ross DJ, Fowlie MK, Blackwell PG (2001) Social organization of cooperatively breeding long-tailed tits: kinship and spatial dynamics. *Journal of Animal Ecology* **70**: 820-830.
- 632 Sloane SA (2001) Bushtit: *Psaltriparus minimus*. in *Birds of North America: Life Histories for the Twenty-First Century*. (ed. Poole A, Stettenheim P, Gill F) p. 1-19. American Ornithologist's Union and Academy of Natural Sciences, Philadelphia: Washington, D.C.
- 633 Löhrl H, Thaler E (1992) Behavioural traits as an aid to solving taxonomic problems. *Bulletin of the British Ornithologists Club* **112A**: 199-208.
- 634 Sturmbauer C, Berger B, Dallinger R, Föger M (1998) Mitochondrial phylogeny of the genus *Regulus* and implications on the evolution of breeding behavior in sylvioid songbirds. *Molecular Phylogenetics and Evolution* **10**: 144-149.
- 635 Ali S, Ripley SD (1973) *Handbook of the birds of India and Pakistan. Vol. 8. Warblers to redstarts*. Oxford University Press: Bombay.
- 636 Fishpool LDC, Tobias JA (2005) Family Pycnonotidae (Bulbuls). in *Handbook of the birds of the world. Vol. 10. Cuckoo-shrikes to thrushes*. (ed. del Hoyo J, Elliott A, Christie D) p. 124-250. Lynx edicions: Barcelona.
- 637 Carlson A (1986) Group territoriality in the rattling cisticola, *Cisticola chiniana*. *Oikos* **47**: 181-189.
- 638 Hustler K (2000) The breeding biology of the chirping cisticola in north-western Zimbabwe. *Honeyguide* **46**: 4-12.
- 639 Parker ISC (1997) Co-operative breeding in two African warblers. *Scopus* **19**: 117.
- 640 Hustler K (2001) The breeding biology of the black-backed cisticola in north-west Zimbabwe with notes on song and specific status. *Honeyguide* **47**: 25-36.
- 641 Lewis MJ (2002) personal communication.
- 642 MacKinnon J, Phillips K (1993) *A field guide to the Birds of Borneo, Sumatra, Java and Bali*. Oxford University Press: Oxford.
- 643 Cramp S, ed. (1992) *The birds of the western Palearctic Vol. VI. Warblers*. Oxford University Press: Oxford.
- 644 Lin L, Alexander P, Severinghaus L (1998) Breeding ecology of tawny and yellow-bellied wren warblers (*Prinia subflava* and *P. flaviventris*). *Bulletin of the Institute of Zoology Academia Sinica (Taipei)* **27**: 57-66.
- 645 Atkinson P, Peet N, Alexander J (1991) The status and conservation of the endemic species of Sao Tomé and Príncipe, West Africa. *Bird Conservation International* **1**: 255-282.
- 646 Shirihai H, Gargallo G, Helbig AJ (2001) *Sylvia warblers: identification, taxonomy and phylogeny of the genus Sylvia*. Christopher Helm: Oxford.
- 647 Gaston AJ (1978) Social behaviour of the yellow-eyed babbler *Chrysomma sinensis*. *Ibis* **120**: 361-364.
- 648 MacKinnon J, Phillips K (2000) *A field guide to the birds of China*. Oxford University Press: Oxford.
- 649 Ali S, Ripley SD (1971) *Handbook of the birds of India and Pakistan. Vol. 6. Cuckoo-shrikes to babaxes*. Oxford University Press: Bombay.
- 650 Kim C-H, Yamagishi S, Won P-O (1992) Social organization of the crow tit *Paradoxornis webbiana* during the non-breeding season. *Japanese Journal of Ornithology* **40**: 93-107.

- 651 Kim C-H, Yamagishi S, Won P-O (1995) Egg-color dimorphism and breeding success in the crow tit (*Paradoxornis webbiana*). *Auk* **112**: 831-839.
- 652 Ma S (1988) Studies on the population ecology of the Chinese crowtit. *Zoological Research* **9**: 217-224.
- 653 Geupel GR, Ballard G (2002) Wrentit. in *Birds of North America: Life Histories for the Twenty-First Century*. (ed. Poole A, Stettenheim P, Gill F) p. 1-20. American Ornithologist's Union and Academy of Natural Sciences, Philadelphia: Washington, D.C.
- 654 Yuan H-W, Liu M, Shen S-F (2004) Joint-nesting in Taiwan yuhinas: a rare passerine case. *Condor* **106**: 862-872.
- 655 Covas R (2003) personal communication.
- 656 Gill FB (1971) Ecology and evolution of sympatric mascarene white eyes, *Zosterops borbonica* and *Zosterops olivacea*. *Auk* **88**: 35-60.
- 657 Cheke AS (1987b) The ecology of the surviving native land birds of Reunion. in *Studies on Mascarene Birds*. (ed. Diamond AW) p. 301-358. Cambridge University Press: Cambridge.
- 658 Ali S, Ripley SD (1974) *Handbook of the birds of India and Pakistan. Vol. 10. Flowerpeckers to buntings*. Oxford University Press: Bombay.
- 659 Radicke FL (1985) Der indische brillenvogel *Zosterops palebrosus*. *Neue Brehm-Buecherei* **672**: 1-119.
- 660 van Riper SG (2000) Japanese white-eye. in *Birds of North America: Life Histories for the Twenty-First Century*. (ed. Poole A, Stettenheim P, Gill F) p. 1-16. American Ornithologist's Union and Academy of Natural Sciences, Philadelphia: Washington, D.C.
- 661 Craig RJ (1989) Observations on the foraging ecology and social behavior of the bridled white-eye. *Condor* **91**: 187-192.
- 662 Lusk MR, Taisacan E (1997) Description of a bridled white-eye nest from Rota, Mariana Islands. *Micronesica* **30**: 183-185.
- 663 Amidon FA, Haas CA, Morton JM (2004) Breeding biology of the endangered Rota bridled white-eye. *Wilson Bulletin* **116**: 342-346.
- 664 Longmore W (1991) *Honeyeaters and their allies of Australia*. Angus & Robertson: North Ryde.
- 665 Noske RA (1999) Notes on the breeding biology of the tropical mangrove-dwelling yellow white-eye *Zosterops luteus*. *Australian Bird Watcher* **18**: 3-7.
- 666 Robertson BC, Degnan SM, Kikkawa J, Moritz CC (2001) Genetic monogamy in the absence of paternity guards: the Capricorn silvereye, *Zosterops lateralis chlorocephalus*, on Heron Island. *Behavioral Ecology* **12**: 666-673.
- 667 Pyle P, Engbring J (1988) First described nest and nest site activity of the truk greater white-eye (*Rukia ruki*). *Micronesica* **21**: 281-283.
- 668 Springer MS, Higuchi H, Ueda K, Minton J, Sibley CG (1995) Molecular evidence that the Bonin Islands 'honeyeater' is a white-eye. *Journal of the Yamashina Institute for Ornithology* **27**: 66-77.
- 669 Higuchi H, Nakane M, Maru T (1993) Home range and pair duration of the Bonin Islands honeyeater *Apalopteron familiare*. *Strix* **12**: 23-33.
- 670 Stinson CM, Stinson DW (1994) Nest sites, clutch size and incubation behavior in the golden white-eye. *Journal of Field Ornithology* **65**: 65-69.

- 671 Roberts TJ (1992) *The birds of Pakistan. Volume 2. Passeriformes, pittas to buntings*. Oxford University Press: Oxford.
- 672 Hails C (1987) *Birds of Singapore*. Times Editions: Singapore.
- 673 Duckworth JW (1997) Mobbing of a drongo cuckoo *Surniculus lugubris*. *Ibis* **139**: 190-192.
- 674 Pierce AJ, Poprasert K, Gale GA (2004) Breeding ecology and nesting success of Abbott's babbler (*Malacocincla abbottii*). *Wilson Bulletin* **116**: 275-277.
- 675 Sheldon FH, Moyle RG, Kennard J (2001) Ornithology of Sabah: history, gazetteer, annotated checklist, and bibliography. *Ornithological Monographs* **52**: 1-285.
- 676 Banks J, Banks J (1987) A note on the first discovery of the nest and eggs of the ashy-headed babbler *Garrulax cinereifrons*, an endemic species of Sri Lanka, in 1984. *Journal of the Bombay Natural History Society* **84**: 682-683.
- 677 Étchécopar RD, Hue F (1983) *Les oiseaux de Chine de Mongolie et de corée passereaux*. Societe Nouvelle des Éditions Boubée.
- 678 Young RA (1978) Co-operative breeding in the white-crested laughing thrush *Garrulax leucolophus* with notes on its hand rearing at Busch Bird Park, Houston. *International Zoo Yearbook* **18**: 106-109.
- 679 Mace ME (1991) Breeding and hand-rearing Tickell's laughing thrush *Garrulax strepitans* at the San Diego Wild Animal Park. *International Zoo Yearbook* **30**: 187-191.
- 680 Schneider H, Reul-Schneider M (2003) [Experiences on the care and breeding of the Chinese yellow-throated laughing thrush.]. *ZGAP Mitteilungen* **19**: 28-29.
- 681 Zacharias VJ (1997) Possible communal nesting in the Wynaad laughing thrush *Garrulax delesserti delesserti* (Jerdon). *Journal of the Bombay Natural History Society* **94**: 414.
- 682 Bi ZL, Gu Y, Jia CX, Jiang YX, Sun YH (2003) Nests, eggs, and nestling behavior of the snowy-cheeked laughingthrush (*Garrulax sukatschewi*) at Lianhuashan Natural Reserve, Gansu, China. *Wilson Bulletin* **115**: 474-477.
- 683 Islam MA (1994) Breeding habits of the Nilgiri laughing thrush *Garrulax cachinnans* (Jerdon). *Journal of the Bombay Natural History Society* **91**: 16-28.
- 684 Islam MA (1989) Nest destruction and cannibalistic behaviour of laughing thrushes, *Garrulax* spp. (Aves: Muscicapidae). *Bangladesh Journal of Zoology* **17**: 15-17.
- 685 Islam MA (1995) Breeding behaviour of the whitebreasted laughing thrush *Garrulax jerdoni* Blyth (Aves: Muscicapidae). *Bangladesh Journal of Zoology* **23**: 125-132.
- 686 Haines CM (1989) Breeding the red-tailed laughing-thrush *Garrulax milnei* at Padstow tropical bird gardens (Cornwall). *Avicultural Magazine* **95**: 10-13.
- 687 Gaston AJ (1978) Ecology of the common babbler *Turdoides caudatus*. *Ibis* **120**: 415-432.
- 688 Zahavi A (1990) Arabian babblers: the quest for social status in a cooperative breeder. in *Cooperative breeding in birds: long-term studies of ecology and behaviour*. (ed. Stacey PB, Koenig WD) p. 103-130. Cambridge University Press: Cambridge.
- 689 Huels TR (1982) Co-operative feeding of conspecific and *Clamator jacobinus* young by *Turdoides rubiginosus*. *Scopus* **6**: 33-35.
- 690 Gaston AJ (1978) Demography of the jungle babbler, *Turdoides striatus*. *Journal of Animal Ecology* **47**: 845-870.



- 691 Male TD, Fancy SG, Ralph CJ (1998) Red-billed leiothrix. in *Birds of North America: Life Histories for the Twenty-First Century*. (ed. Poole A, Stettenheim P, Gill F) p. 1-12. American Ornithologist's Union and Academy of Natural Sciences, Philadelphia: Washington, D.C.
- 692 Eames JC, Lambert FR, Nguyen C (1995) Rediscovery of the sooty babbler *Stachyris herberti* in central Vietnam. *Bird Conservation International* **5**: 129-135.
- 693 Fessl B, Kleindorfer S, Hoi H, Lorenz K (1996) Extra male parental behaviour: evidence for an alternative mating strategy in the moustached warbler *Acrocephalus melanopogon*. *Journal of Avian Biology* **27**: 88-91.
- 694 Hamao S, Ueda K (1998) Nest sharing by polygynously mated females in the black-browed reed warbler *Acrocephalus bistrigiceps*. *Ibis* **140**: 176-178.
- 695 Hamao S (2000) The cost of mate guarding in the black-browed reed warbler *Acrocephalus bistrigiceps*: when do males stop guarding their mates? *Journal of the Yamashina Institute for Ornithology* **32**: 1-12.
- 696 Eising CM, Komdeur J, Buys J, Reemer M, Richardson DS (2001) Islands in a desert: breeding ecology of the African Reed Warbler *Acrocephalus baeticatus* in Namibia. *Ibis* **143**: 482-493.
- 697 Brazil MA (1991) *The birds of Japan*. Smithsonian Institution Press: Washington DC.
- 698 Blakers M, Davies SJJF, Reilly PN (1984) *The atlas of Australian birds*. Melbourne University Press: Melbourne.
- 699 Morin MP, Conant S, Conant P (1997) Laysan and Nihoa millerbird. in *Birds of North America: Life Histories for the Twenty-First Century*. (ed. Poole A, Stettenheim P, Gill F) p. 1-20. American Ornithologist's Union and Academy of Natural Sciences, Philadelphia: Washington, D.C.
- 700 Milder SL, Sreiber RW (1982) A note on the mating behaviour of *Acrocephalus aequinoctialis*. *Bulletin of the British Ornithologists Club* **102**: 20-22.
- 701 Brooke MD, Hartley IR (1995) Nesting Henderson reed-warblers (*Acrocephalus vaughani taiti*) studied by DNA fingerprinting: unrelated coalitions in a stable habitat? *Auk* **112**: 77-86.
- 702 Cheke AS (1987c) Observations on the surviving endemic birds of Rodriguez. in *Studies on Mascarene Birds*. (ed. Diamond AW) p. 364-400. Cambridge University Press: Cambridge.
- 703 Komdeur J (1992) Importance of habitat saturation and territory quality for evolution of cooperative breeding in the Seychelles warbler. *Nature* **358**: 493-95.
- 704 Ohara H, Yamagishi S (1984) The first record of helping at the nest in the short-tailed bush warbler *Cettia squameiceps*. *Tori* **33**: 39-41.
- 705 Ohara H, Yamagishi S (1985) A helper at the nest of the short-tailed bush warbler *Cettia squameiceps*. *Journal of the Yamashina Institute for Ornithology* **17**: 67-73.
- 706 Hamao S (1992) Lack of pair-bond: a polygynous mating system of the Japanese bush warbler *Cettia diphone*. *Japanese Journal of Ornithology* **40**: 51-65.
- 707 Hamao S, Matsubara H, Kajita M, Mitamura A (2001) A record of a male bush warbler feeding its fledglings. *Strix* **19**: 187-189.
- 708 Wada M, Shimizu T, Kobayashi S, Yatani A, Sandaiji Y, Ishikawa T, Takemure E (1999) Behavioral and hormonal basis of polygynous breeding in male bush warblers (*Cettia diphone*). *General and Comparative Endocrinology* **116**: 422-432.
- 709 Cibois A, Slikas B, Schulenberg TS, Pasquet E (2001) An endemic radiation of Malagasy songbirds is revealed by mitochondrial DNA sequence data. *Evolution* **55**: 1198-1206.
- 710 Flint VE, Boehme RL, Kostin YV, Kuznetsov AA (1984) *A field guide to birds of the USSR including eastern Europe and central Asia*. Princeton University Press: Princeton.

- 711 Magrath MJL (2002) personal communication.
- 712 Nagata H (1988) An example of facultative polygyny in Middendorff's grasshopper warbler (*Locustella ochotensis*). *Ecological Research* **3**: 57-60.
- 713 Lawn MR (1996) Two male willow warblers at same nest. *British Birds* **89**: 319-320.
- 714 Forstmeier W, Leisler B, Kempnaers B (2001) Bill morphology reflects female independence from male parental help. *Proceedings Royal Society of London Series B Biological Sciences* **268**: 1583-1588.
- 715 Price T, Jamdar N (1992) Breeding of eight sympatric species of *Phylloscopus* warblers in Kashmir. *Journal of the Bombay Natural History Society* **88**: 242-255.
- 716 Cohen C, Spottiswoode C (2000) *Essential birding: western South Africa*. Struik: Cape Town.
- 717 Parkes DA, Masterson ANB (1998) The biology of Livingstone's flycatcher. *Honeyguide* **44**: 69-78.
- 718 Sefc KM, Payne RB, Sorenson MD (2003) Phylogenetic relationships of African sunbird-like warblers: moho (*Hypergerus atriceps*), green hylia (*Hylia prasina*) and tit-hylia (*Pholidornis rushiae*). *Ostrich* **74**: 8-17.
- 719 Fuchs J, Fjeldså J, Bowie RCK, Voelker G, Pasquet E (2005) The African warbler genus *Hyliota* as a lost lineage in the oscine songbird tree: molecular support for an African origin of the Passerida. *Molecular Phylogenetics and Evolution* **\*\*\*: \*\*\*\*-\*\*\***.
- 720 Prys-Jones R (1979) The ecology and conservation of the Aldabra brush warbler *Nesillas aldebranus*. *Philosophical Transactions of the Royal Society of London* **286**: 211-234.
- 721 Kiltie RA, Fitzpatrick JW (1984) Reproduction and social organization of the black-capped donacobius (*Donacobius atricapillus*) in southeastern Peru. *Auk* **101**: 804-811.
- 722 Ragusa-Netto J (1996) Nestling development, size and juvenile survival in *Donacobius atricapillus* (Passeriformes: Troglodytidae). *Ararajuba* **4**: 81-85.
- 723 Barker FK (2004) Monophyly and relationships of wrens (Aves : Troglodytidae): a congruence analysis of heterogeneous mitochondrial and nuclear DNA sequence data. *Molecular Phylogenetics and Evolution* **31**: 486-504.
- 724 Temple HJ (2005) Family Dulidae (Palmchat). in *Handbook of the birds of the world. Vol. 10. Cuckoo-shrikes to thrushes*. (ed. del Hoyo J, Elliott A, Christie D) p. 326-331. Lynx edicions: Barcelona.
- 725 Porter RF, Aspinall SJ (2005) Family Hypocoliidae (Hypocolius). in *Handbook of the birds of the world. Vol. 10. Cuckoo-shrikes to thrushes*. (ed. del Hoyo J, Elliott A, Christie D) p. 320-325. Lynx edicions: Barcelona.
- 726 Barker FK (1999) The evolution of cooperative breeding in *Campylorhynchus* wrens: a comparative approach. PhD thesis. University of Chicago.
- 727 Kroodsma DE, Brewer D (2005) Family Troglodytidae (Wrens). in *Handbook of the birds of the world. Vol. 10. Cuckoo-shrikes to thrushes*. (ed. del Hoyo J, Elliott A, Christie D) p. 356-447. Lynx edicions: Barcelona.
- 728 Jones SL, Dieni JS (1995) Canyon wren. in *Birds of North America: Life Histories for the Twenty-First Century*. (ed. Poole A, Stettenheim P, Gill F) p. 1-12. American Ornithologist's Union and Academy of Natural Sciences, Philadelphia: Washington, D.C.
- 729 Lowther PE, Kroodsma DE, Farley GH (2000) Rock wren. in *Birds of North America: Life Histories for the Twenty-First Century*. (ed. Poole A, Stettenheim P, Gill F) p. 1-20. American Ornithologist's Union and Academy of Natural Sciences, Philadelphia: Washington, D.C.
- 730 Christian DG, Roberts D (2000) First description of nest and nesting behavior of the nightingale wren. *Wilson Bulletin* **112**: 284-287.

- 731 Jullien M, Cariveau DP (2001) First description of the nest of the wing-banded wren in French Guiana. *Wilson Bulletin* **113**: 398-403.
- 732 Herkert JR, Kroodsma DE, Gibbs JP (2001) Sedge wren: *Cistothorus platensis*. in *Birds of North America: Life Histories for the Twenty-First Century*. (ed. Poole A, Stettenheim P, Gill F) p. 1-19. American Ornithologist's Union and Academy of Natural Sciences, Philadelphia: Washington, D.C.
- 733 Stiles FG, Caycedo P (2002) A new subspecies of Apolinar's wren (*Cistothorus apolinari*, Aves: Troglodytidae): an endangered Columbian endemic. *Caldasia* **24**: 191-199.
- 734 Kroodsma DE, Verner J (1997) Marsh wren (*Cistothorus palustris*). in *Birds of North America: Life Histories for the Twenty-First Century*. (ed. Poole A, Stettenheim P, Gill F) p. 1-32. American Ornithologist's Union and Academy of Natural Sciences, Philadelphia: Washington, D.C.
- 735 Johnson LS (1998) House wren *Troglodytes aedon*. in *Birds of North America: Life Histories for the Twenty-First Century*. (ed. Poole A, Stettenheim P, Gill F) p. 1-32. American Ornithologist's Union and Academy of Natural Sciences, Philadelphia: Washington, D.C.
- 736 Kennedy ED, White DW (1997) Bewick's wren (*Thryomanes bewickii*). in *Birds of North America: Life Histories for the Twenty-First Century*. (ed. Poole A, Stettenheim P, Gill F) p. 1-28. American Ornithologist's Union and Academy of Natural Sciences, Philadelphia: Washington, D.C.
- 737 Proudfoot GA, Sherry DA, Johnson S (2000) Cactus wren. in *Birds of North America: Life Histories for the Twenty-First Century*. (ed. Poole A, Stettenheim P, Gill F) p. 1-24. American Ornithologist's Union and Academy of Natural Sciences, Philadelphia: Washington, D.C.
- 738 Brewer D, MacKay BK (2001) *Wrens, dippers and thrashers*. Christopher Helm: London.
- 739 Arlow S (2004) Ecuador 22nd November to 8th December. A birding trip report. <http://www.surfbirds.com/mb/trips/ecuadorarlow03/ecuador-arlow03pt3.html>.
- 740 Ahumada JA (2001) Comparison of the reproductive biology of two Neotropical wrens in an unpredictable environment in northeastern Colombia. *Auk* **118**: 191-210.
- 741 Gill SA (2004) First record of cooperative breeding in a *Thryothorus* wren. *Wilson Bulletin* **116**: 337-341.
- 742 Robinson TR, Robinson WD, Edwards EC (2000) Breeding ecology and nest-site selection of song wrens in central Panama. *Auk* **117**: 345-354.
- 743 Haggerty TM, Morton ES (1995) Carolina wren. in *Birds of North America: Life Histories for the Twenty-First Century*. (ed. Poole A, Stettenheim P, Gill F) p. 1-20. American Ornithologist's Union and Academy of Natural Sciences, Philadelphia: Washington, D.C.
- 744 Webster MD (1999) Verdin. in *Birds of North America: Life Histories for the Twenty-First Century*. (ed. Poole A, Stettenheim P, Gill F) p. 1-20. American Ornithologist's Union and Academy of Natural Sciences, Philadelphia: Washington, D.C.
- 745 Ellison WG (1992) Blue-gray gnatcatcher. in *Birds of North America: Life Histories for the Twenty-First Century*. (ed. Poole A, Stettenheim P, Gill F) p. 1-20. American Ornithologist's Union and Academy of Natural Sciences, Philadelphia: Washington, D.C.
- 746 Atwood JL, Bontrager DR (2001) California gnatcatcher: *Polioptila californica*. in *Birds of North America: Life Histories for the Twenty-First Century*. (ed. Poole A, Stettenheim P, Gill F) p. 1-31. American Ornithologist's Union and Academy of Natural Sciences, Philadelphia: Washington, D.C.
- 747 Farquhar CG, Ritchie KL (2002) Black-tailed gnatcatcher. in *Birds of North America: Life Histories for the Twenty-First Century*. (ed. Poole A, Stettenheim P, Gill F) p. 1-24. American Ornithologist's Union and Academy of Natural Sciences, Philadelphia: Washington, D.C.
- 748 Willis EO, Bosso A (1997) A nest of the cream-bellied gnatcatcher, *Polioptila lactea*. *Ornitologia Neotropical* **8**: 75-76.
- 749 Kingery HE, Ghalambor CK (2001) Pygmy nuthatch: *Sitta pygmaea*. in *Birds of North America: Life Histories for the Twenty-First Century*. (ed. Poole A, Stettenheim P, Gill F) p. 1-31. American Ornithologist's Union and Academy of Natural Sciences, Philadelphia: Washington, D.C.
- 750 Withgott JH, Smith KG (1998) Brown-headed nuthatch. in *Birds of North America: Life Histories for the Twenty-First Century*. (ed. Poole A, Stettenheim P, Gill F) p. 1-24. American Ornithologist's Union and Academy of Natural Sciences, Philadelphia: Washington, D.C.

- 751 Ingold JL, Wallace GE (1994) Ruby-crowned kinglet. *Regulus calendula*. in *Birds of North America: Life Histories for the Twenty-First Century*. (ed. Poole A, Stettenheim P, Gill F) p. 1-24. American Ornithologist's Union and Academy of Natural Sciences, Philadelphia: Washington, D.C.
- 752 Löhrl H, Thaler E, Christie DA (1996) Status and behaviour of the Tenerife goldcrest. *British Birds* **89**: 376-386.
- 753 Ingold JL, Galati R (1997) Golden-crowned kinglet. in *Birds of North America: Life Histories for the Twenty-First Century*. (ed. Poole A, Stettenheim P, Gill F) p. 1-28. American Ornithologist's Union and Academy of Natural Sciences, Philadelphia: Washington, D.C.
- 754 Chu MC (2005) Family Ptilonotidae (Silky-flycatchers). in *Handbook of the birds of the world. Vol. 10. Cuckoo-shrikes to thrushes*. (ed. del Hoyo J, Elliott A, Christie D) p. 292-302. Lynx edicions: Barcelona.
- 755 Cibois A, Cracraft J (2004) Assessing the passerine "Tapestry": phylogenetic relationships of the Muscicapidae inferred from nuclear DNA sequences. *Molecular Phylogenetics and Evolution* **32**: 264-273.
- 756 Voelker G, Spellman GM (2004) Nuclear and mitochondrial DNA evidence of polyphyly in the avian superfamily Muscicapidae. *Molecular Phylogenetics and Evolution* **30**: 386-394.
- 757 Mountjoy DJ (2005) Family Bombycillidae (Waxwings). in *Handbook of the birds of the world. Vol. 10. Cuckoo-shrikes to thrushes*. (ed. del Hoyo J, Elliott A, Christie D) p. 304-318. Lynx edicions: Barcelona.
- 758 Feare C, Craig A (1998) *Starlings and mynas*. Christopher Helm: London.
- 759 Pinxten R, Eens M, Verheyen RF (1994) Communal breeding in the European starling: evidence from DNA fingerprinting. *Auk* **111**: 482-486.
- 760 Draffan R (1977) Notes on the yellow-faced myna: *Mino dumonti*. *PNG Bird Society Newsletter* **133**: 8-9.
- 761 Cimprich DA, Moore FR (1995) Gray catbird. in *Birds of North America: Life Histories for the Twenty-First Century*. (ed. Poole A, Stettenheim P, Gill F) p. 1-20. American Ornithologist's Union and Academy of Natural Sciences, Philadelphia: Washington, D.C.
- 762 Cody ML (2005) Family Mimidae (Mockingbirds and thrashers). in *Handbook of the birds of the world. Vol. 10. Cuckoo-shrikes to thrushes*. (ed. del Hoyo J, Elliott A, Christie D) p. 448-495. Lynx edicions: Barcelona.
- 763 Derrickson KC, Breitwisch R (1992) Northern mockingbird. in *Birds of North America: Life Histories for the Twenty-First Century*. (ed. Poole A, Stettenheim P, Gill F) p. 1-26. American Ornithologist's Union and Academy of Natural Sciences, Philadelphia: Washington, D.C.
- 764 Paredes M, Weir E, Gil K (2001) Reproduction of the bird *Mimus gilvus* (Passeriformes: Mimidae) in Maracaibo, Venezuela. *Rev. Biol. Trop.* **49**: 1143-1146.
- 765 Morton ES, Stutchbury BJM, Piper WH (2004) Cooperative breeding in the tropical mockingbird (*Mimus gilvus*) in the Panama Canal Zone. *Ornitologia Neotropical* **15**: 417-421.
- 766 Reynolds TD, Rich TD, Stephens DA (1999) Sage thrasher. in *Birds of North America: Life Histories for the Twenty-First Century*. (ed. Poole A, Stettenheim P, Gill F) p. 1-23. American Ornithologist's Union and Academy of Natural Sciences, Philadelphia: Washington, D.C.
- 767 Cavitt JF, Haas CA (2000) Brown thrasher. in *Birds of North America: Life Histories for the Twenty-First Century*. (ed. Poole A, Stettenheim P, Gill F) p. 1-28. American Ornithologist's Union and Academy of Natural Sciences, Philadelphia: Washington, D.C.
- 768 Tweit RC (1997) Long-billed thrasher (*Toxostoma longirostre*). in *Birds of North America: Life Histories for the Twenty-First Century*. (ed. Poole A, Stettenheim P, Gill F) p. 1-12. American Ornithologist's Union and Academy of Natural Sciences, Philadelphia: Washington, D.C.
- 769 England AS, Laudenslayer WF, Jr. (1993) Bendire's thrasher. in *Birds of North America: Life Histories for the Twenty-First Century*. (ed. Poole A, Stettenheim P, Gill F) p. 1-16. American Ornithologist's Union and Academy of Natural Sciences, Philadelphia: Washington, D.C.
- 770 Tweit RC (1996) Curve-billed thrasher (*Toxostoma curvirostre*). in *Birds of North America: Life Histories for the Twenty-First Century*. (ed. Poole A, Stettenheim P, Gill F) p. 1-20. American Ornithologist's Union and Academy of Natural Sciences, Philadelphia: Washington, D.C.

- 771 Sheppard JM (1996) Le Conte's thrasher (*Toxostoma lecontei*). in *Birds of North America: Life Histories for the Twenty-First Century*. (ed. Poole A, Stettenheim P, Gill F) p. 1-24. American Ornithologist's Union and Academy of Natural Sciences, Philadelphia: Washington, D.C.
- 772 Cody ML (1998) California thrasher. in *Birds of North America: Life Histories for the Twenty-First Century*. (ed. Poole A, Stettenheim P, Gill F) p. 1-24. American Ornithologist's Union and Academy of Natural Sciences, Philadelphia: Washington, D.C.
- 773 Cody ML (1999) Crissal thrasher *Toxostoma crissale*. in *Birds of North America: Life Histories for the Twenty-First Century*. (ed. Poole A, Stettenheim P, Gill F) p. 1-28. American Ornithologist's Union and Academy of Natural Sciences, Philadelphia: Washington, D.C.
- 774 Ormerod SJ, Tyler SJ (2005) Family Cinclidae (Dippers). in *Handbook of the birds of the world. Vol. 10. Cuckoo-shrikes to thrushes*. (ed. del Hoyo J, Elliott A, Christie D) p. 332-355. Lynx edicions: Barcelona.
- 775 Grimes LG (1976) The occurrence of cooperative breeding behaviour in African birds. *Ostrich* **47**: 1-15.
- 776 Lavrenchenko LA (1984) [Factors influencing the nesting success of the tricolor flycatcher (*Ficedula zanthopygia*)]. *Ornitologiya* **19**: 204-205.
- 777 Collar NJ (2005) Family Turdidae (Thrushes). in *Handbook of the birds of the world. Vol. 10. Cuckoo-shrikes to thrushes*. (ed. del Hoyo J, Elliott A, Christie D) p. 514-807. Lynx edicions: Barcelona.
- 778 Nemeth E, Fanshawe JH, Ngala D (2003) A first nest record and notes on the breeding behaviour and season of the East Coast akalat *Sheppardia gunningi* from Arabuko-Sokoke Forest in Kenya. *Scopus* **23**: 7-11.
- 779 Oatley T (2003) Observations on nesting success and cooperative breeding in the Karoo robin. *Bird Numbers* **12**: 41-49.
- 780 Steyn P (1983) Karoo scrub robin cooperative breeding. *Promerops* **157**: 12.
- 781 Longrigg TD (1983) Karoo scrub-robin cooperative breeding. *Promerops* **156**: 9.
- 782 Aguon CF, Conant S (1994) Breeding biology of the white-rumped shama on Oahu, Hawaii. *Wilson Bulletin* **106**: 311-328.
- 783 Roberts GE, Male TD, Conant S (1998) White-rumped shama *Copsychus malabaricus*. in *Birds of North America: Life Histories for the Twenty-First Century*. (ed. Poole A, Stettenheim P, Gill F) p. 1-12. American Ornithologist's Union and Academy of Natural Sciences, Philadelphia: Washington, D.C.
- 784 Andersson R (1996) Helping behaviour in black redstart *Phoenicurus ochruros*. *Ornis Svecica* **6**: 130-132.
- 785 Urquhart E, Bowley A (2002) *Stonechats: a guide to the genus Saxicola*. Christopher Helm: London.
- 786 Earle RA, Herholdt JJ (1986) Co-operative breeding in the anteating chat. *Ostrich* **57**: 188-189.
- 787 Edwards EA (1996) Breeding behaviour of Arnot's chat. *Honeyguide* **42**: 213-216.
- 788 Klicka J, Voelker G, Spellman GM (2005) A molecular phylogenetic analysis of the "true thrushes" (Aves: Turdinae). *Molecular Phylogenetics and Evolution* **34**: 486-500.
- 789 Rimmer CC, McFarland KP, Ellison WG, Goetz JE (2001) Bicknell's thrush: *Catharus bicknelli*. in *Birds of North America: Life Histories for the Twenty-First Century*. (ed. Poole A, Stettenheim P, Gill F) p. 1-27. American Ornithologist's Union and Academy of Natural Sciences, Philadelphia: Washington, D.C.
- 790 Goetz JE, McFarland KP, Rimmer CC (2003) Multiple paternity and multiple male feeders in Bicknell's thrush (*Catharus bicknelli*). *Auk* **120**: 1044-1053.

- 791 Gowaty PA, Plissner JH (1998) Eastern bluebird *Sialia sialis*. in *Birds of North America: Life Histories for the Twenty-First Century*. (ed. Poole A, Stettenheim P, Gill F) p. 1-32. American Ornithologist's Union and Academy of Natural Sciences, Philadelphia: Washington, D.C.
- 792 Dickinson JL, Akre JJ (1998) Extrapair paternity, inclusive fitness, and within-group benefits of helping in western bluebirds. *Molecular Ecology* **7**: 95-105.
- 793 Dickinson JL, Koenig WD, Pitelka FA (1996) Fitness consequences of helping behavior in the western bluebird. *Behavioral Ecology* **7**: 168-177.
- 794 Power HW, Lombardo MP (1996) Mountain bluebird. in *Birds of North America: Life Histories for the Twenty-First Century*. (ed. Poole A, Stettenheim P, Gill F) p. 1-24. American Ornithologist's Union and Academy of Natural Sciences, Philadelphia: Washington, D.C.
- 795 Snetsinger TJ, Wakelee KM, Fancy SG (1999) Puaiohi. in *Birds of North America: Life Histories for the Twenty-First Century*. (ed. Poole A, Stettenheim P, Gill F) p. 1-19. American Ornithologist's Union and Academy of Natural Sciences, Philadelphia: Washington, D.C.
- 796 Barker FK, Barrowclough GF, Groth JG (2002) A phylogenetic hypothesis for passerine birds: taxonomic and biogeographic implications of an analysis of nuclear DNA sequence data. *Proceedings of the Royal Society of London Series B-Biological Sciences* **269**: 295-308.
- 797 Cheke RA, Mann CF, Allen R (2001) *Sunbirds: a guide to the sunbirds, flowerpeckers, spiderhunters and sugarbirds of the world*. Christopher Helm: London.
- 798 Ganguly JK (1986) Co-operative feeding of chicks of the purple-rumped sunbird (*Nectarinia zeylonica*). *Journal of the Bombay Natural History Society* **83**: 447.
- 799 Wells DR (2005) Family Chloropseidae (Leafbirds). in *Handbook of the birds of the world. Vol. 10. Cuckoo-shrikes to thrushes*. (ed. del Hoyo J, Elliott A, Christie D) p. 252-266. Lynx edicions: Barcelona.
- 800 Wells DR (2005) Family Irenidae (Fairy-bluebirds). in *Handbook of the birds of the world. Vol. 10. Cuckoo-shrikes to thrushes*. (ed. del Hoyo J, Elliott A, Christie D) p. 268-277. Lynx edicions: Barcelona.
- 801 Nakamura M (1998) Multiple mating and cooperative breeding in polygynandrous alpine accentors. I. Competition among females. *Animal Behaviour* **55**: 257-73.
- 802 Nakamura M (1998) Multiple mating and cooperative breeding in polygynandrous alpine accentors. II. Male mating tactics. *Animal Behaviour* **55**: 275-87.
- 803 Hatchwell BJ (2005) Family Prunellidae (Accentors). in *Handbook of the birds of the world. Vol. 10. Cuckoo-shrikes to thrushes*. (ed. del Hoyo J, Elliott A, Christie D) p. 496-513. Lynx edicions: Barcelona.
- 804 Ericson PGB, Johansson US (2003) Phylogeny of Passerida (Aves: Passeriformes) based on nuclear and mitochondrial sequence data. *Molecular Phylogenetics and Evolution* **29**: 126-128.
- 805 Lowther PE, Nosedal J (1997) Olive warbler (*Peucedramus taeniatus*). in *Birds of North America: Life Histories for the Twenty-First Century*. (ed. Poole A, Stettenheim P, Gill F) p. 1-12. American Ornithologist's Union and Academy of Natural Sciences, Philadelphia: Washington, D.C.
- 806 Crook JH (1958) Études sur le comportement social de *Bubalornis a. albirostris*. *Alauda* **26**: 161-195.
- 807 Fry CH, Keith S, eds. (2004) *The Birds of Africa Vol. VII. Sparrows to buntings*. Christopher Helm: London.
- 808 Sorenson MD, Payne RB (2001) A single ancient origin of brood parasitism in African finches: implications for host-parasite coevolution. *Evolution* **55**: 2550-2567.
- 809 Winterbottom M, Burke T, Birkhead TR (2001) The phalloid organ, orgasm and sperm competition in a polygynandrous bird: the red-billed buffalo weaver (*Bubalornis niger*). *Behavioral Ecology and Sociobiology* **50**: 474-482.
- 810 Wilkinson R, McLeod W (1994) Breeding the white-headed (Bohm's) buffalo weaver and the Taveta golden weaver at Chester Zoo. *Avicultural Magazine* **100**: 24-28.

- 811 Lewis DM (1982) Cooperative breeding in a population of white-browed sparrow weavers *Plocepasser mahali*. *Ibis* **124**: 511-522.
- 812 Lewis DM (1981) Determinants of reproductive success of the white-browed sparrow weaver, *Plocepasser mahali*. *Behavioral Ecology and Sociobiology* **9**: 83-93.
- 813 Bennun L (1994) The contribution of helpers to feeding nestlings in gray-capped social weavers, *Pseudonigrita arnaudi*. *Animal Behaviour* **47**: 1047-1056.
- 814 Covas R, Brown CR, Anderson MD, Brown MB (2004) Juvenile and adult survival in the sociable weaver (*Philetairus socius*): a southern-temperate colonial cooperative breeder in Africa. *Auk* **121**: 1199-1207.
- 815 Din NA (1992) Pattern of nest destruction in two village weavers (*Ploceus cucullatus* and *P. nigerrimus*) at Ife, Nigeria. *African Journal of Ecology* **30**: 261-268.
- 816 Maclean GL (1993) *Roberts' birds of southern Africa. Sixth edition*. John Voelcker Bird Book Fund: Cape Town.
- 817 Kumar Sharma S (1992) Relationship between canopy density and breeding behaviour of *Ploceus philippinus* (Linn.) and *Ploceus benghalensis* (Linn.). *Journal of the Bombay Natural History Society* **89**: 78-83.
- 818 Cramp S, Perrins CM, eds. (1994) *The birds of the western Palearctic Vol. VIII. Crows to finches*. Oxford University Press: Oxford.
- 819 Crook JH (1964) The evolution of social organisation and visual communication in the weaver birds (Ploceinae). *Behaviour Supplement* **X**: 1-178.
- 820 Collar NJ, Stuart SN (1985) *Threatened birds of Africa and related islands. The ICBP/IUCN Red Data Book. pt 1 3rd ed*. ICBP & IUCN: Cambridge.
- 821 Brosset A (1978) Social organization and nest-building in the forest weaver birds of the genus *Malimbus* (Ploceinae). *Ibis* **120**: 27-27.
- 822 Gatter W, Gardner R (1993) The biology of the Gola malimbe *Malimbus ballmanni* Wolters 1974. *Bird Conservation International* **3**: 87-103.
- 823 Elgood JH (1975) *Malimbus ibadanensis*: a fresh statement of biology and status. *Bulletin of the British Ornithologists Club* **95**: 78-80.
- 824 Hudgens BR (1997) Nest predation avoidance by the blue-billed malimbe *Malimbus nitens* (Ploceinae). *Ibis* **139**: 692-694.
- 825 Safford RJ (1997) The annual cycle and breeding behaviour of the Mauritius fody *Foudia rubra*. *Ostrich* **68**: 58-67.
- 826 Kraaijeveld K, Komdeur J (2003) Observations on the breeding biology of the Seychelles fody on Cousine Island. *Ostrich* **74**: 117-124.
- 827 Impey AJ, Cote IM, Jones CG (2002) Population recovery of the threatened endemic Rodrigues fody (*Foudia flavicans*) (Aves, Ploceidae) following reforestation. *Biological Conservation* **107**: 299-305.
- 828 Savalli UM (1997) The role of male territories in the mating system of the yellow-shouldered widowbird *Euplectes macrourus*. *Ibis* **139**: 374-378.
- 829 Andersson M (1982) Female choice selects for extreme tail length in a widowbird. *Nature* **299**: 818-820.
- 830 Andersson S (1991) Bowers on the savanna: display courts and mate choice in a lekking widowbird. *Behavioral Ecology* **2**: 210-218.

- 831 Andersson S (1992) Female preference for long tails in lekking Jackson's widowbirds: experimental evidence. *Animal Behaviour* **43**: 379-386.
- 832 Andersson S (1993) Sexual dimorphism and modes of sexual selection in lekking Jackson's widowbirds *Euplectes jacksoni* (Ploceinae). *Biological Journal of Linnean Society* **49**: 1-17.
- 833 Goodwin D (1982) *Estrildid finches of the world*. Oxford University Press: Oxford.
- 834 Summers-Smith JD (1988) *The sparrows: a study of the genus Passer*. Poyser: Calton.
- 835 Sappington JN (1977) Breeding biology of house sparrows in north Mississippi. *Wilson Bulletin* **89**: 300-309.
- 836 Morel MY, Morel GJ (1973) Premiers observations sur la reproduction du Moineau doré *Passer luteus* (Licht) en zone semi-aride de l'ouest africain. *Oiseau et la Revue Francaise d'Ornithologie* **43**: 97-118.
- 837 Clement P, Harris A, Davis J (1993) *Finches and sparrows*. Christopher Helm: London.
- 838 Wood B, Madge SC, Waller CS (1978) Description, moult and measurements of *Montifringilla theresae*. *Bulletin of the British Ornithologists Club* **98**: 55-59.
- 839 Lohmus M, Silverin B (1999) Male aggressiveness and the possible occurrence of group territoriality in the brambling *Fringilla montifringilla*. *Ornis Svecica* **9**: 75-82.
- 840 Nakamura H (1991) Dispersal of the oriental greenfinch *Carduelis sinica* from communal display areas and social organization in breeding season (Aves: Fringillidae). *Journal of the Yamashina Institute for Ornithology* **22**: 9-55.
- 841 Dawson WR (1995) Pine siskin. in *Birds of North America: Life Histories for the Twenty-First Century*. (ed. Poole A, Stettenheim P, Gill F) p. 1-24. American Ornithologist's Union and Academy of Natural Sciences, Philadelphia: Washington, D.C.
- 842 Middleton ALA (1993) American goldfinch. in *Birds of North America: Life Histories for the Twenty-First Century*. (ed. Poole A, Stettenheim P, Gill F) p. 1-24. American Ornithologist's Union and Academy of Natural Sciences, Philadelphia: Washington, D.C.
- 843 Watt DJ, Willoughby EJ (1999) Lesser goldfinch. in *Birds of North America: Life Histories for the Twenty-First Century*. (ed. Poole A, Stettenheim P, Gill F) p. 1-24. American Ornithologist's Union and Academy of Natural Sciences, Philadelphia: Washington, D.C.
- 844 Davis JN (1999) Lawrence's goldfinch. in *Birds of North America: Life Histories for the Twenty-First Century*. (ed. Poole A, Stettenheim P, Gill F) p. 1-20. American Ornithologist's Union and Academy of Natural Sciences, Philadelphia: Washington, D.C.
- 845 MacDougall-Shackleton SA, Johnson RE, Hahn TP (2000) Gray-crowned rosy-finch. in *Birds of North America: Life Histories for the Twenty-First Century*. (ed. Poole A, Stettenheim P, Gill F) p. 1-16. American Ornithologist's Union and Academy of Natural Sciences, Philadelphia: Washington, D.C.
- 846 Johnson RE (2002) Black rosy-finch. in *Birds of North America: Life Histories for the Twenty-First Century*. (ed. Poole A, Stettenheim P, Gill F) p. 1-28. American Ornithologist's Union and Academy of Natural Sciences, Philadelphia: Washington, D.C.
- 847 Johnson RE, Hendricks P, Pattie DL, Hunter KB (2000) Brown-capped rosy-finch: *Leucosticte australis*. in *Birds of North America: Life Histories for the Twenty-First Century*. (ed. Poole A, Stettenheim P, Gill F) p. 1-24. American Ornithologist's Union and Academy of Natural Sciences, Philadelphia: Washington, D.C.
- 848 Wootton JT (1996) Purple finch. in *Birds of North America: Life Histories for the Twenty-First Century*. (ed. Poole A, Stettenheim P, Gill F) p. 1-20. American Ornithologist's Union and Academy of Natural Sciences, Philadelphia: Washington, D.C.
- 849 Hahn TP (1996) Cassin's finch (*Carpodacus cassinii*). in *Birds of North America: Life Histories for the Twenty-First Century*. (ed. Poole A, Stettenheim P, Gill F) p. 1-20. American Ornithologist's Union and Academy of Natural Sciences, Philadelphia: Washington, D.C.
- 850 Hill GE (1993) House finch. in *Birds of North America: Life Histories for the Twenty-First Century*. (ed. Poole A, Stettenheim P, Gill F) p. 1-24. American Ornithologist's Union and Academy of Natural Sciences, Philadelphia: Washington, D.C.



- 851 Nethersole-Thompson D (1975) *Pine crossbills: a Scottish contribution*. T & AD Poyser: London.
- 852 Gillihan SW, Byers B (2001) Evening grosbeak: *Coccothraustes vespertinus*. in *Birds of North America: Life Histories for the Twenty-First Century*. (ed. Poole A, Stettenheim P, Gill F) p. 1-23. American Ornithologist's Union and Academy of Natural Sciences, Philadelphia: Washington, D.C.
- 853 Morin MP, Conant S (2002) Laysan finch. Nihoa finch. in *Birds of North America: Life Histories for the Twenty-First Century*. (ed. Poole A, Stettenheim P, Gill F) p. 1-32. American Ornithologist's Union and Academy of Natural Sciences, Philadelphia: Washington, D.C.
- 854 Pratt HD (2005) *The Hawaiian honeycreepers: Drepanidinae*. Oxford University Press: Oxford.
- 855 Snetsinger TJ, Reynolds MH, Herrmann CM (1998) 'O'u. Lana'i hookbill. in *Birds of North America: Life Histories for the Twenty-First Century*. (ed. Poole A, Stettenheim P, Gill F) p. 1-20. American Ornithologist's Union and Academy of Natural Sciences, Philadelphia: Washington, D.C.
- 856 Banko PC, Johnson L, Lindsey GD, Fancy SG, Pratt TK, Jacobi JD, Banko WE (2002) Palila. in *Birds of North America: Life Histories for the Twenty-First Century*. (ed. Poole A, Stettenheim P, Gill F) p. 1-24. American Ornithologist's Union and Academy of Natural Sciences, Philadelphia: Washington, D.C.
- 857 Simon JC, Pratt TK, Berlin KE, Kowalsky JR (2000) Reproductive ecology of the Maui parrotbill. *Wilson Bulletin* **112**: 482-490.
- 858 Lindsey GD, Vanderwerf EA, Baker H, Baker PE (1998) Hawai'i 'amakihi. Kaua'i 'amakihi. O'ahu 'amakihi. Greater 'amakihi. in *Birds of North America: Life Histories for the Twenty-First Century*. (ed. Poole A, Stettenheim P, Gill F) p. 1-28. American Ornithologist's Union and Academy of Natural Sciences, Philadelphia: Washington, D.C.
- 859 Lepson JK (1997) 'Anianiau (*Hemignathus parvus*). in *Birds of North America: Life Histories for the Twenty-First Century*. (ed. Poole A, Stettenheim P, Gill F) p. 1-16. American Ornithologist's Union and Academy of Natural Sciences, Philadelphia: Washington, D.C.
- 860 Pratt TK, Fancy SG, Ralph CJ (2001) 'Akiapola'au: *Hemignathus munroi*. Nukupu'u: *Hemignathus lucidus*. in *Birds of North America: Life Histories for the Twenty-First Century*. (ed. Poole A, Stettenheim P, Gill F) p. 1-27. American Ornithologist's Union and Academy of Natural Sciences, Philadelphia: Washington, D.C.
- 861 Foster JT, Scott JM, Sykes PW, Jr. (2000) 'Akikiki. in *Birds of North America: Life Histories for the Twenty-First Century*. (ed. Poole A, Stettenheim P, Gill F) p. 1-16. American Ornithologist's Union and Academy of Natural Sciences, Philadelphia: Washington, D.C.
- 862 Lepson JK, Woodworth BL (2002) Hawai'i creeper. in *Birds of North America: Life Histories for the Twenty-First Century*. (ed. Poole A, Stettenheim P, Gill F) p. 1-21. American Ornithologist's Union and Academy of Natural Sciences, Philadelphia: Washington, D.C.
- 863 Woodworth BL, Nelson JT, Tweed EJ, Fancy SG, Moore MP, Cohen EB, Collins MS (2001) Breeding productivity and survival of the endangered Hawai'i creeper in a wet forest refuge on Mauna Kea, Hawai'i. *Studies in Avian Biology* **22**: 164-172.
- 864 VanderWerf EA (1998) Breeding biology and territoriality of the Hawaii creeper. *Condor* **100**: 541-545.
- 865 Baker PE, Baker H (2000) Maui 'alauahio. in *Birds of North America: Life Histories for the Twenty-First Century*. (ed. Poole A, Stettenheim P, Gill F) p. 1-27. American Ornithologist's Union and Academy of Natural Sciences, Philadelphia: Washington, D.C.
- 866 Lepson JK, Pratt HD (1997) Akekee. in *Birds of North America: Life Histories for the Twenty-First Century*. (ed. Poole A, Stettenheim P, Gill F) p. 1-16. American Ornithologist's Union and Academy of Natural Sciences, Philadelphia: Washington, D.C.
- 867 Lepson JK, Freed LA (1997) Akepa. in *Birds of North America: Life Histories for the Twenty-First Century*. (ed. Poole A, Stettenheim P, Gill F) p. 1-24. American Ornithologist's Union and Academy of Natural Sciences, Philadelphia: Washington, D.C.
- 868 Fancy SG, Ralph CJ (1998) 'I'iwi. in *Birds of North America: Life Histories for the Twenty-First Century*. (ed. Poole A, Stettenheim P, Gill F) p. 1-16. American Ornithologist's Union and Academy of Natural Sciences, Philadelphia: Washington, D.C.
- 869 Berlin KE, Vangelder EM (1999) 'Akohekohe. in *Birds of North America: Life Histories for the Twenty-First Century*. (ed. Poole A, Stettenheim P, Gill F) p. 1-16. American Ornithologist's Union and Academy of Natural Sciences, Philadelphia: Washington, D.C.
- 870 Fancy SG, Ralph CJ (1997) Apapane. in *Birds of North America: Life Histories for the Twenty-First Century*. (ed. Poole A, Stettenheim P, Gill F) p. 1-16. American Ornithologist's Union and Academy of Natural Sciences, Philadelphia: Washington, D.C.

- 871 Pratt TK, Kepler CB, Casey TLC (1997) Po'ouli. in *Birds of North America: Life Histories for the Twenty-First Century*. (ed. Poole A, Stettenheim P, Gill F) p. 1-16. American Ornithologist's Union and Academy of Natural Sciences, Philadelphia: Washington, D.C.
- 872 Tyler SJ (2004) Family Motacillidae (Pipits and wagtails). in *Handbook of the birds of the world. Vol. 9. Cotingas to pipits and wagtails*. (ed. del Hoyo J, Elliott A, Christie D) p. 686-786. Lynx edicions: Barcelona.
- 873 Badyaev AV, Gibson DD, Kessel B (1996) White wagtail (*Motacilla alba*) and black-backed wagtail (*Motacilla lugens*). in *Birds of North America: Life Histories for the Twenty-First Century*. (ed. Poole A, Stettenheim P, Gill F) p. 1-24. American Ornithologist's Union and Academy of Natural Sciences, Philadelphia: Washington, D.C.
- 874 Nakamura S (1985) Clutch size and breeding success of the Japanese wagtail *Motacilla grandis*, with a special reference to its habitat and mating system. *Journal of the Yamashina Institute for Ornithology* **17**: 84-104.
- 875 Ali S, Ripley SD (1973) *Handbook of the birds of India and Pakistan. Vol. 9. Robins to wagtails*. Oxford University Press: Bombay.
- 876 Verbeek NAM, Hendricks P (1994) American pipit. in *Birds of North America: Life Histories for the Twenty-First Century*. (ed. Poole A, Stettenheim P, Gill F) p. 1-24. American Ornithologist's Union and Academy of Natural Sciences, Philadelphia: Washington, D.C.
- 877 Robbins MB, Dale BC (1999) Sprague's pipit. in *Birds of North America: Life Histories for the Twenty-First Century*. (ed. Poole A, Stettenheim P, Gill F) p. 1-16. American Ornithologist's Union and Academy of Natural Sciences, Philadelphia: Washington, D.C.
- 878 Andors AV (1995) Breeding of *Anthus furcatus* (Aves: Motacillidae) in northern Patagonia, with a review of the breeding biology of the species. *Ornitologia Neotropical* **6**: 37-52.
- 879 With KA (1994) McCown's longspur. in *Birds of North America: Life Histories for the Twenty-First Century*. (ed. Poole A, Stettenheim P, Gill F) p. 1-24. American Ornithologist's Union and Academy of Natural Sciences, Philadelphia: Washington, D.C.
- 880 Hussell DJT, Montgomerie R (2002) Lapland longspur. in *Birds of North America: Life Histories for the Twenty-First Century*. (ed. Poole A, Stettenheim P, Gill F) p. 1-32. American Ornithologist's Union and Academy of Natural Sciences, Philadelphia: Washington, D.C.
- 881 Briskie JV (1994) Smith's longspur. in *Birds of North America: Life Histories for the Twenty-First Century*. (ed. Poole A, Stettenheim P, Gill F) p. 1-16. American Ornithologist's Union and Academy of Natural Sciences, Philadelphia: Washington, D.C.
- 882 Hill DP, Gould LK (1997) Chestnut-collared longspur. in *Birds of North America: Life Histories for the Twenty-First Century*. (ed. Poole A, Stettenheim P, Gill F) p. 1-20. American Ornithologist's Union and Academy of Natural Sciences, Philadelphia: Washington, D.C.
- 883 Cramp S, Perrins CM, eds. (1994b) *The birds of the western Palearctic Vol. IX. Buntings and New World Warblers*. Oxford University Press: Oxford.
- 884 Lyon B, Montgomerie R (1995) Snow bunting. McKay's bunting. in *Birds of North America: Life Histories for the Twenty-First Century*. (ed. Poole A, Stettenheim P, Gill F) p. 1-28. American Ornithologist's Union and Academy of Natural Sciences, Philadelphia: Washington, D.C.
- 885 Groth JG (2000) Molecular evidence for the systematic position of *Urocynchramus pylzowi*. *Auk* **117**: 787-791.
- 886 Byers C, Olsson U, Curson J (1995) *Buntings and sparrows: a guide to the buntings and North American sparrows*. Pica Press: Sussex.
- 887 Shane TG (2000) Lark bunting: *Calamospiza melanocorys*. in *Birds of North America: Life Histories for the Twenty-First Century*. (ed. Poole A, Stettenheim P, Gill F) p. 1-28. American Ornithologist's Union and Academy of Natural Sciences, Philadelphia: Washington, D.C.
- 888 Weckstein JD, Kroodsma DE, Faucett RC (2002) Fox sparrow. in *Birds of North America: Life Histories for the Twenty-First Century*. (ed. Poole A, Stettenheim P, Gill F) p. 1-28. American Ornithologist's Union and Academy of Natural Sciences, Philadelphia: Washington, D.C.
- 889 Arcese P, Sogge MK, Marr AB, Patten MA (2002) Song sparrow. in *Birds of North America: Life Histories for the Twenty-First Century*. (ed. Poole A, Stettenheim P, Gill F) p. 1-40. American Ornithologist's Union and Academy of Natural Sciences, Philadelphia: Washington, D.C.
- 890 Ammon EM (1995) Lincoln's sparrow. in *Birds of North America: Life Histories for the Twenty-First Century*. (ed. Poole A, Stettenheim P, Gill F) p. 1-20. American Ornithologist's Union and Academy of Natural Sciences, Philadelphia: Washington, D.C.

- 891 Mowbray TB (1997) Swamp sparrow. in *Birds of North America: Life Histories for the Twenty-First Century*. (ed. Poole A, Stettenheim P, Gill F) p. 1-24. American Ornithologist's Union and Academy of Natural Sciences, Philadelphia: Washington, D.C.
- 892 Norment CJ, Shackleton SA (1993) Harris' sparrow. in *Birds of North America: Life Histories for the Twenty-First Century*. (ed. Poole A, Stettenheim P, Gill F) p. 1-20. American Ornithologist's Union and Academy of Natural Sciences, Philadelphia: Washington, D.C.
- 893 Falls JB, Kopachena JG (1994) White-throated sparrow. in *Birds of North America: Life Histories for the Twenty-First Century*. (ed. Poole A, Stettenheim P, Gill F) p. 1-32. American Ornithologist's Union and Academy of Natural Sciences, Philadelphia: Washington, D.C.
- 894 Chilton G, Baker MC, Barrentine CD, Cunningham MA (1995) White-crowned sparrow. in *Birds of North America: Life Histories for the Twenty-First Century*. (ed. Poole A, Stettenheim P, Gill F) p. 1-28. American Ornithologist's Union and Academy of Natural Sciences, Philadelphia: Washington, D.C.
- 895 Norment CJ, Hendricks P, Santonocito R (1998) Golden-crowned sparrow. in *Birds of North America: Life Histories for the Twenty-First Century*. (ed. Poole A, Stettenheim P, Gill F) p. 1-20. American Ornithologist's Union and Academy of Natural Sciences, Philadelphia: Washington, D.C.
- 896 Nolan V, Jr., Ketterson ED, Cristol DA, Rogers CM, Clotfelter ED, Titus RC, Schoech SJ, Snajor E (2002) Dark-eyed junco. in *Birds of North America: Life Histories for the Twenty-First Century*. (ed. Poole A, Stettenheim P, Gill F) p. 1-44. American Ornithologist's Union and Academy of Natural Sciences, Philadelphia: Washington, D.C.
- 897 Sullivan KA (1999) Yellow-eyed junco. in *Birds of North America: Life Histories for the Twenty-First Century*. (ed. Poole A, Stettenheim P, Gill F) p. 1-23. American Ornithologist's Union and Academy of Natural Sciences, Philadelphia: Washington, D.C.
- 898 Wheelwright NT, Rising JD (1993) Savannah sparrow. in *Birds of North America: Life Histories for the Twenty-First Century*. (ed. Poole A, Stettenheim P, Gill F) p. 1-28. American Ornithologist's Union and Academy of Natural Sciences, Philadelphia: Washington, D.C.
- 899 Post W, Greenlaw JS (1994) Seaside sparrow. in *Birds of North America: Life Histories for the Twenty-First Century*. (ed. Poole A, Stettenheim P, Gill F) p. 1-28. American Ornithologist's Union and Academy of Natural Sciences, Philadelphia: Washington, D.C.
- 900 Greenlaw JS, Rising JD (1994) Sharp-tailed sparrow. in *Birds of North America: Life Histories for the Twenty-First Century*. (ed. Poole A, Stettenheim P, Gill F) p. 1-28. American Ornithologist's Union and Academy of Natural Sciences, Philadelphia: Washington, D.C.
- 901 Lowther PE (1996) Le Conte's sparrow. in *Birds of North America: Life Histories for the Twenty-First Century*. (ed. Poole A, Stettenheim P, Gill F) p. 1-16. American Ornithologist's Union and Academy of Natural Sciences, Philadelphia: Washington, D.C.
- 902 Guzy MJ, Ribic CA, Sample DW (2002) Helping at a Henslow's Sparrow nest in Wisconsin. *Wilson Bulletin* **114**: 407-409.
- 903 Green MT, Lowther PE, Jones SL, Davis SK, Dale BC (2002) Baird's sparrow. in *Birds of North America: Life Histories for the Twenty-First Century*. (ed. Poole A, Stettenheim P, Gill F) p. 1-20. American Ornithologist's Union and Academy of Natural Sciences, Philadelphia: Washington, D.C.
- 904 Kaspari M, O'Leary H (1988) Non-parental attendants in a north-temperate migrant. *Auk* **105**: 792-793.
- 905 Vickery PD (1996) Grasshopper sparrow (*Ammodramus savannarum*). in *Birds of North America: Life Histories for the Twenty-First Century*. (ed. Poole A, Stettenheim P, Gill F) p. 1-24. American Ornithologist's Union and Academy of Natural Sciences, Philadelphia: Washington, D.C.
- 906 Oliveras de Ita A, Gomez de Silva H, Grosselet M (2001) Population dynamics and natural history of the Sierra Madre sparrow *Xenospiza baileyi* at La Cima, Mexico. *Cotinga* **15**: 43-47.
- 907 Naugler CT (1993) American tree sparrow. in *Birds of North America: Life Histories for the Twenty-First Century*. (ed. Poole A, Stettenheim P, Gill F) p. 1-12. American Ornithologist's Union and Academy of Natural Sciences, Philadelphia: Washington, D.C.
- 908 Middleton ALA (1998) Chipping sparrow. in *Birds of North America: Life Histories for the Twenty-First Century*. (ed. Poole A, Stettenheim P, Gill F) p. 1-32. American Ornithologist's Union and Academy of Natural Sciences, Philadelphia: Washington, D.C.
- 909 Knapton RW (1994) Clay-colored sparrow. *Spizella pallida*. in *Birds of North America: Life Histories for the Twenty-First Century*. (ed. Poole A, Stettenheim P, Gill F) p. 1-16. American Ornithologist's Union and Academy of Natural Sciences, Philadelphia: Washington, D.C.
- 910 Gill MJ, Krannitz PG (1997) A case of helping behavior at a Brewer's Sparrow, *Spizella breweri*, nest. *Canadian Field Naturalist* **111**: 650-652.

- 911 Rotenberry JT, Patten MA, Preston KL (1999) Brewer's sparrow. in *Birds of North America: Life Histories for the Twenty-First Century*. (ed. Poole A, Stettenheim P, Gill F) p. 1-24. American Ornithologist's Union and Academy of Natural Sciences, Philadelphia: Washington, D.C.
- 912 Carey M, Berhans DE, Nelson DA (1994) Field sparrow. in *Birds of North America: Life Histories for the Twenty-First Century*. (ed. Poole A, Stettenheim P, Gill F) p. 1-20. American Ornithologist's Union and Academy of Natural Sciences, Philadelphia: Washington, D.C.
- 913 Wege DC, Howell SNG, Sada AM (1993) The distribution and status of Worthen's sparrow *Spizella wortheni*: a review. *Bird Conservation International* **3**: 211-220.
- 914 Tenney CR (1997) Black-chinned sparrow. in *Birds of North America: Life Histories for the Twenty-First Century*. (ed. Poole A, Stettenheim P, Gill F) p. 1-20. American Ornithologist's Union and Academy of Natural Sciences, Philadelphia: Washington, D.C.
- 915 Jones SL, Cornely JE (2002) Vesper sparrow. in *Birds of North America: Life Histories for the Twenty-First Century*. (ed. Poole A, Stettenheim P, Gill F) p. 1-28. American Ornithologist's Union and Academy of Natural Sciences, Philadelphia: Washington, D.C.
- 916 Martin JW, Parrish JR (2000) Lark sparrow. in *Birds of North America: Life Histories for the Twenty-First Century*. (ed. Poole A, Stettenheim P, Gill F) p. 1-20. American Ornithologist's Union and Academy of Natural Sciences, Philadelphia: Washington, D.C.
- 917 Johnson MJ, van Riper C, Pearson KM (2002) Black-throated sparrow. in *Birds of North America: Life Histories for the Twenty-First Century*. (ed. Poole A, Stettenheim P, Gill F) p. 1-20. American Ornithologist's Union and Academy of Natural Sciences, Philadelphia: Washington, D.C.
- 918 Martin JW, Carlson BA (1998) Sage sparrow. in *Birds of North America: Life Histories for the Twenty-First Century*. (ed. Poole A, Stettenheim P, Gill F) p. 1-20. American Ornithologist's Union and Academy of Natural Sciences, Philadelphia: Washington, D.C.
- 919 Groschupf K (1992) Five-striped sparrow. in *Birds of North America: Life Histories for the Twenty-First Century*. (ed. Poole A, Stettenheim P, Gill F) p. 1-12. American Ornithologist's Union and Academy of Natural Sciences, Philadelphia: Washington, D.C.
- 920 Dunning JB (1993) Bachman's sparrow. in *Birds of North America: Life Histories for the Twenty-First Century*. (ed. Poole A, Stettenheim P, Gill F) p. 1-16. American Ornithologist's Union and Academy of Natural Sciences, Philadelphia: Washington, D.C.
- 921 Webb EA, Bock CE (1996) Botteri's sparrow. in *Birds of North America: Life Histories for the Twenty-First Century*. (ed. Poole A, Stettenheim P, Gill F) p. 1-24. American Ornithologist's Union and Academy of Natural Sciences, Philadelphia: Washington, D.C.
- 922 Dunning JB, Jr., Bowers RK, Jr., Suter SJ, Bock CE (1999) Cassin's sparrow. in *Birds of North America: Life Histories for the Twenty-First Century*. (ed. Poole A, Stettenheim P, Gill F) p. 1-24. American Ornithologist's Union and Academy of Natural Sciences, Philadelphia: Washington, D.C.
- 923 Lowther PE, Groschupf KD, Russell SM (1999) Rufous-winged sparrow *Aimophila carpalis*. in *Birds of North America: Life Histories for the Twenty-First Century*. (ed. Poole A, Stettenheim P, Gill F) p. 1-20. American Ornithologist's Union and Academy of Natural Sciences, Philadelphia: Washington, D.C.
- 924 Collins PW (1999) Rufous-crowned sparrow. in *Birds of North America: Life Histories for the Twenty-First Century*. (ed. Poole A, Stettenheim P, Gill F) p. 1-28. American Ornithologist's Union and Academy of Natural Sciences, Philadelphia: Washington, D.C.
- 925 Dobbs RC, Martin PR, Martin TE (1998) Green-tailed towhee (*Pipilo chlorurus*). in *Birds of North America: Life Histories for the Twenty-First Century*. (ed. Poole A, Stettenheim P, Gill F) p. 1-23. American Ornithologist's Union and Academy of Natural Sciences, Philadelphia: Washington, D.C.
- 926 Greenlaw JS (1996) Spotted towhee. in *Birds of North America: Life Histories for the Twenty-First Century*. (ed. Poole A, Stettenheim P, Gill F) p. 1-32. American Ornithologist's Union and Academy of Natural Sciences, Philadelphia: Washington, D.C.
- 927 Greenlaw JS (1996) Eastern towhee. in *Birds of North America: Life Histories for the Twenty-First Century*. (ed. Poole A, Stettenheim P, Gill F) p. 1-32. American Ornithologist's Union and Academy of Natural Sciences, Philadelphia: Washington, D.C.
- 928 Tweit RC, Finch DM (1994) Abert's towhee. in *Birds of North America: Life Histories for the Twenty-First Century*. (ed. Poole A, Stettenheim P, Gill F) p. 1-20. American Ornithologist's Union and Academy of Natural Sciences, Philadelphia: Washington, D.C.
- 929 Kunzmann MR, Ellison K, Purcell KL, Johnson RR, Haight LT (2002) California towhee. in *Birds of North America: Life Histories for the Twenty-First Century*. (ed. Poole A, Stettenheim P, Gill F) p. 1-20. American Ornithologist's Union and Academy of Natural Sciences, Philadelphia: Washington, D.C.
- 930 Johnson RR, Haight LT (1996) Canyon towhee. in *Birds of North America: Life Histories for the Twenty-First Century*. (ed. Poole A, Stettenheim P, Gill F) p. 1-20. American Ornithologist's Union and Academy of Natural Sciences, Philadelphia: Washington, D.C.

- 931 Skutch AF (1954) *Life histories of Central American Birds I Families Fringillidae, Thraupidae, Icteridae, Parulidae and Corebidae*. Cooper Ornithological Society: Berkeley.
- 932 Tye H, Tye A (1992) First description of the eggs and nest of the golden-winged sparrow *Arremon schlegeli*. *Ornitologia Neotropical* **3**: 71.
- 933 Martin TE, Martin PR, Olson CR, Heidinger BJ, Fontaine JJ (2000) Parental care and clutch sizes in North and South American birds. *Science* **287**: 1482-1485.
- 934 Brush T (1998) Olive sparrow. in *Birds of North America: Life Histories for the Twenty-First Century*. (ed. Poole A, Stettenheim P, Gill F) p. 1-12. American Ornithologist's Union and Academy of Natural Sciences, Philadelphia: Washington, D.C.
- 935 Paynter RA, Jr. (1978) Biology and evolution of the avian genus *Atlapetes* (Emberizinae). *Bulletin of the Museum of Comparative Zoology* **148**: 323-369.
- 936 Salaman PGW, Davalos L, Kirwan GM (1998) The first breeding records of white-rimmed brush-finch *Atlapetes leucopsis* with ecological notes. *Cotinga* **9**: 24-26.
- 937 Oppel S, Schaefer HM, Schmidt V (2003) Description of the nest, eggs, and breeding behavior of the endangered pale-headed brush-finch (*Atlapetes pallidiceps*) in Ecuador. *Wilson Bulletin* **115**: 360-366.
- 938 Young BE, Zook JR (1999) Nesting of four poorly-known species on the Caribbean slope of Costa Rica. *Wilson Bulletin* **111**: 124-128.
- 939 Barrantes G (1994) First description of the nest and eggs of the sooty-faced finch. *Wilson Bulletin* **106**: 574.
- 940 Schulenberg TS, Gill FB (1987) First description of the nest of the olive finch, *Lysurus castaneiceps*. *Condor* **89**: 673-4.
- 941 Eason P (1992) Optimization of territory shape in heterogeneous habitats: a field study of the red-capped cardinal (*Paroaria gularis*). *Journal of Animal Ecology* **61**: 411-424.
- 942 Estades CF, Lopez-Calleja MV (1996) First nesting record of the tamarugo conebill (*Conirostrum tamarugense*). *Auk* **112**: 797-800.
- 943 Isler ML, Isler PR (1999) *Tanagers*. Christopher Helm: London.
- 944 Alves MAS (1990) Social system and helping behavior of the white-banded tanager (*Neothraupis fasciata*). *Condor* **92**: 470-474.
- 945 Sick H (1993) *Birds in Brazil: a natural history [translated by W. Belton]*. Princeton University Press: Princeton.
- 946 Bohórquez CI, Stiles FG (2002) The paradoxical social system of the dusky bush-tanager (*Chlorospingus semifuscus*): lekking in a nine-primaried oscine? *Journal of Field Ornithology* **73**: 281-291.
- 947 Marin AM, Schmitt NJ (1991) Nests and eggs of some Costa Rican birds. *Wilson Bulletin* **103**: 506-509.
- 948 Venturini AC, de Paz PR, Kirwan GM (2002) First breeding data for cherry-throated tanager *Nemosia rourei*. *Cotinga* **17**: 43-45.
- 949 Tello JG (1999) First description of nest and nestlings of white-winged shrike-tanager *Lanio versicolor*. *Cotinga* **11**: 81-82.
- 950 Foster MS, Lopez H NE, Escobar ME (1989) Observations of a nest of red-crowned ant-tanagers in Paraguay. *Journal of Field Ornithology* **60**: 459-468.

- 951 Chesser RT (1994) Migration in South America: an overview of the austral system. *Bird Conservation International* **4**: 91-107.
- 952 Robinson WD (1996) Summer tanager. in *Birds of North America: Life Histories for the Twenty-First Century*. (ed. Poole A, Stettenheim P, Gill F) p. 1-24. American Ornithologist's Union and Academy of Natural Sciences, Philadelphia: Washington, D.C.
- 953 Mowbray TB (1999) Scarlet tanager. in *Birds of North America: Life Histories for the Twenty-First Century*. (ed. Poole A, Stettenheim P, Gill F) p. 1-28. American Ornithologist's Union and Academy of Natural Sciences, Philadelphia: Washington, D.C.
- 954 Hudon J (1999) Western tanager. in *Birds of North America: Life Histories for the Twenty-First Century*. (ed. Poole A, Stettenheim P, Gill F) p. 1-28. American Ornithologist's Union and Academy of Natural Sciences, Philadelphia: Washington, D.C.
- 955 Gomez J, Monros JS, Gil-Delgado JA (2000) Notas sobre la biología de la tangara azuleja *Thraupis episcopus* in Santa Clara (Costa Rica). *Ardeola* **47**: 265-267.
- 956 Robbins MB, Glenn GS (1988) First description of the nest and eggs of the moss-backed tanager (*Buthraupis [Bangsia] edwardsi*). *Condor* **90**: 947-948.
- 957 Strewe R (2001) First breeding records of black-chinned mountain-tanager *Anisognathus notabilis* and first nesting records in the wild of blue-winged mountain-tanager *A. flavinucha* with ecological notes. *Cotinga* **15**: 38-42.
- 958 Sargent S (1993) Nesting biology of the yellow-throated euphonia: large clutch size in a Neotropical frugivore. *Wilson Bulletin* **105**: 285-300.
- 959 dos Anjos L, Schuchmann K-L (1999) Notes on the reproductive behaviour and the nest of the chestnut-bellied euphonia (*Euphonia pectoralis*). *Bulletin of the British Ornithologists Club* **119**: 133-135.
- 960 Long AJ, Heath MF (1994) Nesting ecology and helping behaviour in the azure-rumped tanager in Mexico. *Condor* **96**: 1095-1099.
- 961 Wood TM, Gallo F, Donahue PK (1992) Observations at a paradise tanager nest. *Wilson Bulletin* **104**: 360-362.
- 962 Marra PP (1990) Nest, eggs, and young of the green-and-gold tanager, with notes on timing of breeding. *Wilson Bulletin* **102**: 346-348.
- 963 Moraes VS, Krul R (1997) Notes on the black-backed tanager *Tangara peruviana* (Desmarest, 1806). *Bulletin of the British Ornithologists Club* **117**: 316-318.
- 964 Peris SJ (1997) Notes on the breeding biology and population density of the Tucuman mountain-finch (*Poospiza baeri*; Aves: Emberizidae) in Argentina, with description of nest and eggs. *Revista Chilena de Historia Natural* **70**: 221-224.
- 965 Di Giacomo AG (1998) First record of *Emberizoides ypiranganus* for Formosa Province, Argentina, and first description of its nest and eggs. *Hornero* **15**: 51-52.
- 966 Almeida JB, Macedo RH (2001) Lek-like mating system of the monogamous blue-black grassquit. *Auk* **118**: 404-411.
- 967 Eitniear JC (1997) White-collared seedeater. in *Birds of North America: Life Histories for the Twenty-First Century*. (ed. Poole A, Stettenheim P, Gill F) p. 1-12. American Ornithologist's Union and Academy of Natural Sciences, Philadelphia: Washington, D.C.
- 968 Newman J (2000) White-naped seedeater *Dolospingus fringilloides*. *Cotinga* **14**: 111-112.
- 969 Olson SL (1984) The last St. Kitts bullfinch *Loxigilla portoricensis grandis* (Emberizinae) and the extinction of its race. *Bulletin of the British Ornithologists Club* **104**: 121-123.
- 970 Trail PW, Baptista LF (1988) The behavior, status, and relationships of the endemic St. Lucia black finch. *National Geographic Research* **5**: 82-97.

- 971 Grant PR, Grant BR (1980) The breeding and feeding characteristics of Darwin's finches on Isla Genovesa, Galapagos. *Ecological Monographs* **50**: 381-410.
- 972 Price T, Millington S, Grant P (1983) Helping at the nest in Darwin's finches as misdirected parental care. *Auk* **100**: 192-194.
- 973 Downhower JF (1978) Observations on the nesting of the small ground finch *Geospiza fuliginosa* and the large cactus ground finch *G. conirostris* on Espanola, Galapagos. *Ibis* **120**: 340-346.
- 974 Grant PR (1986) *Ecology and evolution of Darwin's finches*. Princeton University Press: Princeton.
- 975 Temple SA (2002) Dickcissel. in *Birds of North America: Life Histories for the Twenty-First Century*. (ed. Poole A, Stettenheim P, Gill F) p. 1-24. American Ornithologist's Union and Academy of Natural Sciences, Philadelphia: Washington, D.C.
- 976 Wyatt VE, Francis CM (2002) Rose-breasted grosbeak. in *Birds of North America: Life Histories for the Twenty-First Century*. (ed. Poole A, Stettenheim P, Gill F) p. 1-24. American Ornithologist's Union and Academy of Natural Sciences, Philadelphia: Washington, D.C.
- 977 Hill GE (1995) Black-headed grosbeak. in *Birds of North America: Life Histories for the Twenty-First Century*. (ed. Poole A, Stettenheim P, Gill F) p. 1-20. American Ornithologist's Union and Academy of Natural Sciences, Philadelphia: Washington, D.C.
- 978 Halkin SL, Linville SU (1999) Northern cardinal. in *Birds of North America: Life Histories for the Twenty-First Century*. (ed. Poole A, Stettenheim P, Gill F) p. 1-32. American Ornithologist's Union and Academy of Natural Sciences, Philadelphia: Washington, D.C.
- 979 Tweit RC, Thompson CW (1999) Pyrrhuloxia. in *Birds of North America: Life Histories for the Twenty-First Century*. (ed. Poole A, Stettenheim P, Gill F) p. 1-20. American Ornithologist's Union and Academy of Natural Sciences, Philadelphia: Washington, D.C.
- 980 Skutch AF (1987) *Helpers at birds' nests: a worldwide survey of cooperative breeding and related behaviour*. Iowa University Press: Iowa City.
- 981 Moermond TC (1981) Cooperative feeding, defense of young, and flocking in the black-faced grosbeak. *Condor* **83**: 82-83.
- 982 Borges SH, Cardoso RM (1995) Ninho e ovos de *Caryothraustes canadensis* (Passeriformes: Emberizidae). *Ararajuba* **3**: 76.
- 983 Tobias JA, Williams RSR (1996) Notes on the behavior of the masked saltator in southern Ecuador. *Auk* **113**: 942-944.
- 984 Ragusa-Netto J (2001) Sentinels in *Saltator atricollis* (Passeriformes: Emberizidae). *Revista Brasileira de Biologia* **61**: 317-322.
- 985 Ingold JL (1993) Blue grosbeak. in *Birds of North America: Life Histories for the Twenty-First Century*. (ed. Poole A, Stettenheim P, Gill F) p. 1-16. American Ornithologist's Union and Academy of Natural Sciences, Philadelphia: Washington, D.C.
- 986 Greene E, Muehter VR, Davison W (1996) Lazuli bunting (*Passerina amoena*). in *Birds of North America: Life Histories for the Twenty-First Century*. (ed. Poole A, Stettenheim P, Gill F) p. 1-24. American Ornithologist's Union and Academy of Natural Sciences, Philadelphia: Washington, D.C.
- 987 Payne RB (1992) Indigo bunting. in *Birds of North America: Life Histories for the Twenty-First Century*. (ed. Poole A, Stettenheim P, Gill F) p. 1-24. American Ornithologist's Union and Academy of Natural Sciences, Philadelphia: Washington, D.C.
- 988 Groschupf KD, Thompson CW (1998) Varied bunting. in *Birds of North America: Life Histories for the Twenty-First Century*. (ed. Poole A, Stettenheim P, Gill F) p. 1-20. American Ornithologist's Union and Academy of Natural Sciences, Philadelphia: Washington, D.C.
- 989 Lowther PE, Lanyon SM, Thompson CW (1999) Painted bunting. in *Birds of North America: Life Histories for the Twenty-First Century*. (ed. Poole A, Stettenheim P, Gill F) p. 1-24. American Ornithologist's Union and Academy of Natural Sciences, Philadelphia: Washington, D.C.
- 990 Curson J, Quinn D, Beadle D (1994) *New World warblers*. Christopher Helm: London.

- 991 Gill FB, Canterbury RA, Confer JL (2001) Blue-winged warbler: *Vermivora pinus*. in *Birds of North America: Life Histories for the Twenty-First Century*. (ed. Poole A, Stettenheim P, Gill F) p. 1-23. American Ornithologist's Union and Academy of Natural Sciences, Philadelphia: Washington, D.C.
- 992 Nolan V, Jr., Ketterson ED, Buerkle CA (1999) Prairie warbler. in *Birds of North America: Life Histories for the Twenty-First Century*. (ed. Poole A, Stettenheim P, Gill F) p. 1-27. American Ornithologist's Union and Academy of Natural Sciences, Philadelphia: Washington, D.C.
- 993 Hunt PD, Eliason BC (1999) Blackpoll warbler. in *Birds of North America: Life Histories for the Twenty-First Century*. (ed. Poole A, Stettenheim P, Gill F) p. 1-24. American Ornithologist's Union and Academy of Natural Sciences, Philadelphia: Washington, D.C.
- 994 King DI, Champlin TB, Champlin PJ (2000) An observation of cooperative breeding in the ovenbird. *Wilson Bulletin* **112**: 287-288.
- 995 Tarof SA, Stutchbury BJ (1996) A case of cooperative breeding in the hooded warbler. *Wilson Bulletin* **108**: 382-384.
- 996 Conway CJ (1999) Canada warbler *Wilsonia canadensis*. in *Birds of North America: Life Histories for the Twenty-First Century*. (ed. Poole A, Stettenheim P, Gill F) p. 1-24. American Ornithologist's Union and Academy of Natural Sciences, Philadelphia: Washington, D.C.
- 997 Collins CT, Ryan TP (1994) Notes on the breeding biology of the slate-throated redstart (*Myioborus mineatus*) in Venezuela. *Ornitologia Neotropical* **5**: 125-134.
- 998 Jaramillo A, Burke P (1999) *New world blackbirds: the icterids*. Christopher Helm: London.
- 999 Lanyon SM, Omland KE (1999) A molecular phylogeny of the blackbirds (Icteridae): five lineages revealed by cytochrome-b sequence data. *Auk* **116**: 629-639.
- 1000 Price JJ, Lanyon SM (2002) A robust phylogeny of the oropendolas: polyphyly revealed by mitochondrial sequence data. *Auk* **119**: 335-348.
- 1001 Rising JD, Flood NJ (1998) Baltimore oriole *Icterus galbula*. in *Birds of North America: Life Histories for the Twenty-First Century*. (ed. Poole A, Stettenheim P, Gill F) p. 1-32. American Ornithologist's Union and Academy of Natural Sciences, Philadelphia: Washington, D.C.
- 1002 Rising JD, Williams PA (1999) Bullock's oriole *Icterus bullockii*. in *Birds of North America: Life Histories for the Twenty-First Century*. (ed. Poole A, Stettenheim P, Gill F) p. 1-19. American Ornithologist's Union and Academy of Natural Sciences, Philadelphia: Washington, D.C.
- 1003 Scharf WC, Kren J (1996) Orchard oriole. in *Birds of North America: Life Histories for the Twenty-First Century*. (ed. Poole A, Stettenheim P, Gill F) p. 1-24. American Ornithologist's Union and Academy of Natural Sciences, Philadelphia: Washington, D.C.
- 1004 Flood NJ, Rising JD, Brush T (2002) Audubon's oriole. in *Birds of North America: Life Histories for the Twenty-First Century*. (ed. Poole A, Stettenheim P, Gill F) p. 1-16. American Ornithologist's Union and Academy of Natural Sciences, Philadelphia: Washington, D.C.
- 1005 Beason RC, Trout LL (1984) Cooperative breeding in the bobolink. *Wilson Bulletin* **96**: 709-710.
- 1006 Johnson KP, Lanyon SM (1999) Molecular systematics of the grackles and allies, and the effect of additional sequence (cyt b and ND2). *Auk* **116**: 759-768.
- 1007 Cadena CD, Cuervo AM, Lanyon SM (2004) Phylogenetic relationships of the red-bellied grackle (Icteridae: *Hypopyrrhus pyrohypogaster*) inferred from mitochondrial DNA sequence data. *Condor* **106**: 664-670.
- 1008 Cadena CD, Devenish C, Silva N (2002) First observations on the nesting behavior of the Colombian mountain-grackle (*Macroagelaius subalaris*), a probable cooperative breeder. *Ornitologia Neotropical* **13**: 301-305.
- 1009 Dias RA, Mauricio GN (2002) Natural history notes and conservation of a saffron-cowled blackbird in the southern coastal plain of Rio Grande de Sul, Brazil. *Bird Conservation International* **12**: 255-268.
- 1010 Orians GH, Orians CE, Orians KJ (1977) Helpers at the nest in some Argentine blackbirds. in *Evolutionary Ecology*. (ed. Stonehouse B, Perrins CM) p. 137-151. University Park Press: Baltimore.



- 1011 Fraga RM, di Giacomo A (2004) Cooperative breeding of the yellow-rumped marshbird (Icteridae) in Argentina and Paraguay. *Condor* **106**: 671-673.
- 1012 Fraga RM (1991) The social system of a communal breeder, the bay-winged cowbird *Molothrus badius*. *Ethology* **89**: 195-210.
- 1013 Lowther PE (2001) New name for the Bolivian blackbird. *Bulletin of the British Ornithologists Club* **121**: 280-281.
- 1014 Orians GH, Erickmann L, Schultz JC (1977) Nesting and other habits of the Bolivian blackbird (*Oreopsar bolivianus*). *Condor* **79**: 250-256.
- 1015 Studer A, Vielliard J (1988) Premieres donnees etho-ecologiques sur l'icteride bresilien *Curaeus forbesi* (Sclater, 1886) (Aves, Passeriformes). *Revue Suisse de Zoologie* **95**: 1063-1077.
